# Supplementary material for: Stromal inflammation is a targetable driver of hematopoietic aging
Source: Research Square preprint supplement (doi:10.21203/rs.3.rs-1065222/v1), 2021-11-12
Supplement: Supplementary file 1 [file 9ba2835bc4562c07b3a2dceb.xlsx]

## Sheet: Mesenchymal cell distribution
Cell Type*:	Mesenchymal clusters and groups:
	M1	M2	M3	M4	M5	M6	M7	M8	M9	M10	M11	M12	M13	M14	M15	M16
	MSC-L like		OPr like			MSC-S like
Young MSC-L	39	12	0	0	2	0	0	0	0	0	0	0	0	0	0	0
Old MSC-L	33	23	0	0	2	0	0	0	0	0	0	0	0	0	0	0
Young MSC-S	0	0	0	1	8	3	9	4	0	0	0	13	0	2	5	14
Old MSC-S	0	0	0	1	5	2	6	3	10	0	0	10	0	1	0	21
Young OPr	3	0	15	7	14	0	0	0	0	0	0	0	0	0	5	0
Old OPr	7	3	1	3	15	0	0	0	0	0	0	0	0	0	0	0
Young mOPr	0	2	0	1	7	0	0	0	0	1	1	4	1	1	7	1
Old mOPr	4	10	0	0	12	0	0	0	0	0	0	0	0	0	0	0
Total:	86	50	16	13	65	5	15	7	10	1	1	27	1	4	17	36
*cell types identified by index sorting

## Sheet: Mesenchymal ICGS clusters
Gene Symbol	Row ID	M1	M2	M3	M4	M5	M6	M7	M8	M9	M10	M11	M12	M13	M14	M15	M16
Il1rn	A	4.85035	2.01432	0.321741	0.14782	0.902994	0	0.0793666	0	0	0	0	0.0282672	0	0	0	0.0196305
Thsd7a	A	6.05574	3.81739	-0.498229	-0.587116	0.489508	3.3818	0.599618	1.4843	1.70063	-0.636366	-0.636366	0.257298	-0.636366	-0.636366	0.180457	-0.157784
Svep1	A	4.39001	2.14464	-3.28025	-4.14786	-2.94359	1.60371	-1.49346	4.39234	0.22852	-3.19531	4.79238	0.110455	4.32686	-4.2647	-4.09582	-4.08336
Cxcl12	A	7.12857	5.64005	-5.11531	-5.2959	-3.1906	0.265282	-3.63296	1.17312	-3.00058	-2.92447	0.431794	-2.18312	1.12284	-3.08707	-4.93068	-2.85628
Cyp1b1	A	4.3162	2.72322	-4.91529	-4.9275	-3.88163	-2.21103	-2.62234	-1.11652	-4.35766	-5.08796	-5.08796	-4.44168	-5.08796	-4.73689	-4.85344	0.405227
Apoe	A	4.55658	2.92057	-2.36349	-0.0136465	-3.32497	2.35474	-5.93134	-3.4985	-6.18948	0.119381	2.34854	-4.15832	-1.08034	-4.15521	-5.5118	-6.17987
Gas6	A	3.71285	1.41811	-5.46342	-4.93378	-4.31259	1.32977	-2.83991	1.39994	1.44935	0.599129	-2.61927	-2.14968	-0.365397	0.432959	-3.44837	-5.84609
Ccbe1	A	5.95278	4.2989	0.114544	0	0.554679	2.56496	0.595679	2.45362	0.736977	2.42932	0	1.61383	0	0	0.0978743	0.0634827
Fmo2	A	7.76583	6.26125	0.0811907	0.082871	0.571025	6.16697	1.82829	0	4.33116	0	0	0.865327	0	0	0.101104	0.196898
Fbln5	A	3.39713	1.54727	-5.96226	-5.59252	-4.49065	1.91161	-2.16192	0.764405	-1.45834	-6.6812	-4.40629	-2.86814	-6.6812	-3.56449	-5.99643	-0.631304
Nrp1	A	3.38555	1.51805	-2.42133	-4.50252	-3.37355	1.97854	-0.93995	1.02111	-0.589692	-3.00477	-3.8882	-2.10382	0.530083	-4.16713	-5.23241	-3.29025
Ms4a4d	A	6.46142	4.05388	0.0490341	0	0.814021	7.19067	0.346849	2.68856	0	0	0	0.60361	1.41158	0	0.111691	0.019271
H2-K1	A	3.05733	1.59377	-1.98726	-4.75126	-2.73068	-1.03965	-1.53127	-1.24629	-1.11406	-1.12092	-0.368436	-2.18086	0.411933	-2.61499	-2.61424	-0.828942
Igfbp4	A	3.39119	1.35641	-7.80894	-6.20404	-4.271	1.16355	0.033888	-2.06559	1.62489	-0.787235	-0.237566	-2.44844	0.889181	-2.75016	-3.58095	-2.27057
Marcks	A	2.43475	1.74332	-4.35315	-4.55864	-2.12999	-1.34859	0.865009	0.267624	-2.73178	3.22456	2.09286	-1.36173	0.988307	0.465537	-4.86663	-4.62237
Cdc42ep1	A	4.41945	2.43498	-1.63273	-1.52742	-0.972309	0.573305	-1.71118	0.487843	0.23516	5.28361	-2.61923	-1.31436	-2.61923	-1.36565	-1.34088	-1.38007
Fzd5	A	3.34441	1.1291	-3.64032	-1.98272	-2.20905	0.794802	-1.04258	-1.55465	-0.155107	-3.64032	-2.09442	-1.57795	0.0175478	-1.62632	-0.965947	-1.6485
C2	A	4.61889	3.67645	0.0426936	0.143316	0.373316	3.46019	0.562235	2.37347	4.74972	4.69244	0	0.130872	0	0	0	0
B2m	A	1.68975	0.401483	-4.00391	-2.50616	-1.82546	0.579681	-0.611953	-0.411398	-0.575254	-0.347759	-0.631747	-0.937831	0.912535	-1.21323	-2.01959	-0.198218
1500009L16Rik	A	5.98174	2.85604	0.0895983	0.251473	0.225573	0	1.04193	0.773303	0.148321	0	0	0.410569	0	0	0.0987569	1.91105
Gm17366	A	2.33027	0.69956	0	0	0.0506814	0	0.258986	0.235419	0	0	0	0.1641	0	0	0	0.462984
Rbpms	A	4.7524	2.48153	-1.43071	-0.717663	-0.231853	1.31092	1.09883	-1.23383	2.22486	-1.52393	-1.52393	0.221134	7.24423	-1.52393	-1.25262	-0.883384
Slc40a1	A	6.0046	4.20681	0.208888	1.44822	1.11383	0.793168	0	1.01161	0	4.69244	4.98721	0.541171	0	0	0.416593	0
Fgd6	A	5.42539	3.59225	1.19621	2.23555	0.494953	0.530341	0.708897	0	0.0843322	0	0	0.563426	0	1.3423	0.257904	0.789239
Kalrn	A	4.17154	2.37898	-1.78207	-1.59087	-0.722438	-0.946867	-0.765835	-0.945678	-1.11865	-1.9303	-1.9303	-0.89017	-1.9303	0.547512	-0.0788641	0.916264
Runx2	A	2.75204	1.77592	1.53412	-2.5406	-2.39744	-3.23685	-4.41978	-2.76057	-2.33151	3.10459	-4.78052	-3.76725	-4.78052	0.477059	-3.40497	-3.68296
Hvcn1	A	4.52411	3.91991	0.196835	0.0515029	0.63171	0	0	0	0.687345	0	0	0.645236	0	0	0	0.134688
Cd1d1	A	5.42473	3.65382	0	0	0.66606	0	0.0793666	0	0	0	0	0.283318	0	0	0.338919	0.998274
Vezt	A	4.30351	2.91989	-0.395749	-0.868725	-1.89561	-1.91234	-0.865606	-2.02423	-1.96445	-2.80543	-2.80543	-1.08524	4.44331	-0.707627	-0.64573	-0.877518
Fhl2	A	6.30327	4.53387	2.56424	-0.734748	-0.327636	2.09856	0.196367	0.0280371	2.39304	6.19155	-1.13374	0.448788	-1.13374	2.93884	1.47187	-0.935192
Mylk	A	4.45568	3.26549	-1.80344	0.264865	-0.694387	-2.36933	-2.41911	-1.50707	-2.30025	6.22358	5.18776	-0.636291	5.81666	0.565572	1.21778	-2.65695
Fgf7	A	6.79089	4.64929	0.0497583	0	0.976984	4.90365	1.74391	6.27018	3.33426	0	0	0.384371	0	1.8776	0.191069	0
Spp1	A	6.00914	6.13203	-2.82693	2.86175	0.478325	-1.68968	-2.65781	-2.66733	-3.12122	-3.62994	5.76852	-2.17399	-3.62994	-1.46321	3.13876	-2.54338
Sept4	A	6.43633	3.5319	1.07499	0.365341	1.36996	0.884842	0.522784	1.78269	0.333623	0	7.64864	0.514325	0	1.25019	0.35358	0
Myo1b	A	5.00313	3.52518	-1.70391	-1.35037	-0.10608	0.151333	-0.9269	0.515911	-1.26345	1.35106	5.0831	0.115972	0.876439	2.35327	-0.386508	-0.93293
St5	A	4.89327	3.47542	-0.52373	-0.985606	-0.306321	0.963172	-0.568645	0.469541	-0.758913	-1.50515	0.0407479	-0.0300598	-1.50515	0.467605	-0.452236	-1.01858
Sema6d	A	6.41955	4.01559	0.307975	0.451663	1.12017	0	1.01138	1.80618	0.389645	0	0	0.630782	0	0.768064	0.530121	0.887433
Rftn1	A	5.5968	4.37746	0.124365	0.064402	0.15596	2.01244	1.36846	3.37305	1.6867	0	0	0.182583	0	0	0.312489	0.0450993
Angpt1	A	5.94016	3.52931	0	0.064402	0.412164	1.41226	0.887332	3.42557	0.148321	0	0	1.20017	0	0.230518	0	0
BC039771	A	4.89406	3.7772	1.27551	0.231867	0.226045	0	0.162548	0	0	0	0	0.0758322	0	0.68947	0.0518849	0.857604
Rai14	A	3.97237	3.63677	-1.17853	-0.667431	-0.828798	-1.22312	-0.714735	-1.66049	-1.47979	-2.14277	-2.14277	-0.372913	-2.14277	2.11802	-1.39171	-0.975034
Kcnip3	A	5.69446	2.7953	0.889922	0	0.318173	1.03806	0.266412	0	0	0	0	0.334901	0	1.90193	0	0.33388
H2-Q6	A	4.78344	3.97767	0.744297	-0.749219	-0.0365835	-1.09698	-0.926698	-0.830866	-0.435048	-1.09698	-1.09698	-0.694339	1.01424	-0.88592	-0.751721	-0.0379404
Eepd1	A	5.94989	2.5616	0.359593	0.177422	0.399133	0	0.306645	0.103052	0.0994206	0	0	0.392191	0	0.588836	0.157389	0.0492464
Arrdc4	A	5.83781	4.60411	-1.32584	-1.26389	-0.993994	0.623775	-0.289605	0.488227	0.0196777	-2.08323	-2.08323	-0.118222	-2.08323	-0.797405	-1.46876	-0.617742
Cxcl14	A	4.09419	2.58167	-3.16205	-2.85483	-3.61311	-1.55694	-4.98059	1.15542	0.156559	2.87671	-5.54594	-3.59314	0.456102	0.852426	-1.59701	-5.3078
Dlg5	A	3.73	2.58025	-2.45142	-1.99972	-2.81404	-2.41994	-0.924177	-1.85025	-0.396599	-3.93549	-3.93549	-2.5983	-3.93549	-1.80414	-2.50117	-1.50954
Plxna2	A	5.08848	3.96587	-1.95525	-0.333871	-1.04767	-1.54348	-0.524867	-2.89836	-2.40573	-2.89836	-2.89836	-1.21097	-2.89836	1.69536	-2.49628	-1.0335
Tnc	A	4.14518	3.18999	-6.0137	-6.27876	-3.45104	-5.72319	-5.27417	-5.94357	-4.40587	-4.81766	3.98936	-3.23062	1.82156	1.32024	-3.19311	-1.48253
Podnl1	A	6.1268	5.00337	2.04224	0.588987	0.392378	0	0.0659098	0	0	0	0	0.215799	0	2.59572	0.624644	0.050732
Igsf3	A	3.78648	2.57924	-1.02053	-1.9634	-2.58929	-1.5864	-3.08613	-0.876936	-1.11649	0.535633	-4.63794	-3.04558	-4.63794	-3.35019	-2.41045	-4.19241
H2-Q10	A	6.3847	4.13939	0.441499	0	1.12221	0	0.057298	0	0	1.29991	0	0.109811	1.41158	0	0.232835	0.0381654
Ptprd	A	4.06318	3.34031	-4.20712	-4.45107	-1.54644	-1.89168	-1.85891	-2.5268	-4.81706	1.38966	-5.43796	-2.34667	-5.43796	0.895499	-3.9206	-4.94916
Plxnd1	A	5.36533	3.58528	0.234964	-0.874053	-0.745728	-1.59289	-1.67837	-0.165147	-1.76368	1.97161	-1.99384	-0.358797	-1.99384	0.874308	-1.13193	-1.15794
Fgfr2	A	4.09225	3.11066	-2.44003	0.204132	-2.90706	-3.134	-4.14073	-2.54404	-4.75738	2.25594	-4.84186	-3.50731	-4.84186	3.78139	0.583845	-3.79991
Ibsp	A	7.97049	7.04707	-0.307291	3.16899	0.920503	-0.599658	-1.56577	-1.68193	-1.72356	-2.23044	-2.23044	-1.20883	-0.818863	5.74958	0.499802	-1.60708
Lepr	A	4.40005	2.99994	-5.89079	-2.20065	-4.50882	-5.94332	-3.48422	-0.417975	-0.23447	-3.23775	-6.52652	-2.70791	3.2066	-6.0526	-2.48845	-6.08197
Csmd1	A	7.26378	6.50101	-0.57013	-0.637479	0.182152	1.38439	0.160752	1.43702	4.91414	-0.742369	-0.742369	0.045003	-0.742369	-0.391299	-0.671017	-0.699942
Ggt5	A	7.50308	4.95712	0.124331	0.0679446	1.14382	5.28377	0.301813	0.545885	1.18452	0	0	0.333371	0	0	0.035837	0.213073
Cdh11	A	4.70704	3.69767	-4.36444	-2.72567	-2.41185	-0.282315	-3.91725	0.171614	-3.86891	3.79969	-3.62744	-2.93271	-5.17333	1.78117	-4.32882	-4.79162
Tnfrsf19	A	7.34541	6.35981	0.45959	0.34092	1.08065	0.673815	0	1.16145	0.0924365	0	0	0.173788	0	2.32357	0.168262	0
Wdr86	A	7.03289	3.878	0	0.488804	0.234279	0	0.0716772	0.766503	0	0	0	0.0437683	0	0	0.225006	0.0192188
Gpr116	A	7.40187	5.36568	1.09311	-0.0417635	-0.13292	0.0304761	0.364088	-0.743423	1.84206	-0.743423	-0.743423	-0.257931	-0.743423	-0.743423	-0.691538	-0.601242
Ebf3	A	5.97048	4.30033	-3.03306	-1.75304	-2.80772	-1.94905	-0.400614	-0.49021	-2.34436	-3.46859	-3.46859	-1.66905	0.526223	-2.06417	-1.59526	-1.69173
Cdh2	A	7.43091	5.47795	0.0993192	0.0515029	1.10068	0	0.17903	0	0	3.05497	0	0.377078	0	0.211056	0	0
Kitl	A	8.50053	6.58477	-0.916727	-1.14824	-0.234342	0.00111471	0.424732	-0.120403	-0.606095	-1.39728	-1.39728	-0.00726272	-1.39728	0.495097	-1.30241	-0.342545
Pappa	A	8.74878	7.0282	1.13145	-0.364374	0.0862344	1.04333	-0.847928	-0.655407	0.517248	-0.993652	-0.993652	-0.680485	-0.993652	-0.736392	0.669002	-0.913762
Gdpd2	A	8.83008	6.90714	-0.517383	-0.419842	0.220158	-0.245702	-0.656265	-0.457655	-0.580377	-0.656265	-0.656265	-0.364576	-0.656265	-0.439601	-0.36439	-0.549837
Zfp618	A	4.95315	3.32161	0.714494	0.0936106	0.666477	0.289778	1.2462	0.667373	0.489013	0	0	0.384403	0	0	0.813956	0.95676
Angptl4	A	5.90516	3.50469	-0.889532	-0.139182	0.568587	4.54141	0.239523	1.02387	0.018986	0.53465	0.10812	1.33783	7.37368	1.38715	-0.68622	-0.771043
Lmo7	A	5.02383	4.22667	3.37691	0.63811	0.259231	-1.18564	-1.12028	0.673552	-1.18564	3.33366	-1.18564	-0.566322	-1.18564	1.84269	0.22198	-1.16579
Rasgrp2	A	5.02378	3.6378	0.202345	0.342517	1.29934	1.66149	0.169417	1.62385	0.0844776	0	0	0.472442	0	0.211056	0.388338	0.291093
Lphn2	A	5.92412	3.99804	0.666847	2.48362	0.794441	3.85385	1.60358	3.28568	0.0844776	0	0	1.25912	0	1.47235	0.303834	0.521839
S1pr1	A	4.8679	3.02568	0.148521	0.464133	0.762756	0	0.133193	0.461591	0.171377	7.14328	1.54589	0.301716	0	1.90071	0.877671	0.0946271
Pawr	A	4.02669	2.46022	0.297853	0	0.569658	0	0.0793666	0	0	0	0	0	0	0.934732	0	0
Psmb8	A	5.51738	3.54036	0.181716	0.291006	1.23946	4.12582	1.88855	2.69553	0.0924365	1.29991	0	0.424581	0	0	0.224783	1.17003
Tle2	A	3.47608	2.67229	0.274321	-1.23553	-1.27238	-1.37085	-0.533949	-1.17492	-1.38924	-2.73098	-2.73098	-1.92714	5.44838	-1.23572	-0.299802	-0.999223
Rasa3	A	3.01659	0.565765	-0.911157	-2.80698	-2.19598	-1.681	-3.26191	-2.48891	-2.5618	-4.89245	2.64132	-2.2897	3.1207	-1.39605	-1.70341	-0.988579
Mmp23	A	6.22133	3.11206	0.901018	0.0492505	0.751847	7.24063	3.33758	2.01154	0.821028	0	0	1.24223	1.41158	0.230518	0.261765	0.450818
Clec2d	A	3.93787	2.95086	0	0.12586	0.51536	0	1.00178	1.25769	0	0	0	0.830262	0	0.370024	0	0
C4b	A	4.28785	2.11241	-1.01246	1.96356	-3.19407	-0.241772	-1.78869	-1.89392	-0.601216	-4.83771	-4.83771	-0.829	-4.83771	-3.37953	-3.75876	-3.17474
Gprin3	A	4.36543	1.59264	0.154975	0.512265	0.247702	0	0	0	0	3.05497	0	0.0434921	0	0	0.0518849	0
Cebpa	A	4.58364	1.51816	-0.608156	-0.191204	-0.546249	-0.415288	-0.271199	1.48891	-0.200329	3.44366	0.00292371	0.370444	-0.131392	0.347832	-0.88447	0.516587
St3gal6	A	4.98771	2.48913	1.625	0.526064	-0.721157	-1.03165	-1.45697	-1.85399	-1.79595	-0.0445171	-2.01694	-1.65829	-2.01694	1.00822	0.46955	0.131289
Serpina3c	A	6.40309	2.33571	0	0.170377	0.509146	2.46534	0.96686	2.70593	0.0843322	0	0	0.0688447	0	0	0.0825942	1.40079
Samhd1	A	3.65838	1.87823	-0.67877	-2.78671	-1.72649	-0.329725	-0.669498	-3.86152	-2.65065	-3.96468	6.16742	-2.37368	-3.96468	-2.3355	-2.67248	-1.61902
Gpr176	A	4.98799	1.98625	0.179598	0.0489976	0.0806108	0.530341	0	0	1.74584	0	0	0.548154	0	0.211056	0.0371289	0.0222436
F830016B08Rik	A	4.55193	2.31599	0.0399479	0	0.0120585	0	0	0	0.0786833	0	0	0.177964	0	0	0	0.0414487
Adcy2	A	4.29628	2.14477	-0.291502	0.549913	-2.19224	-1.90111	-1.92091	-0.0710548	-2.46518	3.31683	2.67483	-1.73409	1.0539	-0.768452	-1.31305	-2.38279
Lfng	A	5.57696	2.5735	0.85913	0.0515029	0.715979	0.562645	0.057298	0.105748	0.568031	3.05497	8.22196	0.163055	0	0.370024	0.312223	0.717
Epas1	A	3.41929	1.13286	-4.47328	-1.47429	-3.53138	-5.21531	-3.62698	-4.53636	-5.0728	-6.17831	-6.17831	-4.57584	0.214249	-5.29003	-0.227827	-0.297954
Marc1	A	4.93606	2.80096	0	0	0.16238	0	0	0	0	0	0	0.28463	0	0	0.0609557	0
Tns3	A	3.18578	2.32838	-0.563503	-1.38781	-3.73264	-5.37105	-4.49638	-1.55133	-4.28021	2.63846	2.36377	-2.59294	-1.37446	-0.796439	-0.889204	-3.20686
Phactr1	A	6.02125	4.0337	0.188119	1.09363	0.674173	3.28124	0.743301	1.14111	1.70942	0	0	1.16398	0	0	0.361962	0.677614
Steap4	A	6.82192	3.62873	0.891862	0.606342	0.449658	5.49338	0.596116	1.73721	0.968558	7.19777	-0.696238	0.907784	-0.696238	-0.696238	-0.696238	-0.660155
Il7	A	5.48149	2.93086	1.21599	0.0382457	0.126213	1.26464	0.854725	0.16295	1.16677	0	0	0.497715	0	0	0.0752961	0.669978
Bmp6	A	6.20264	2.26656	0.318603	-1.50909	-1.59738	-1.32974	-0.432423	-1.73069	-1.46982	-1.73069	-1.73069	0.0861042	-0.319107	-0.0959008	1.80766	1.30236
Shroom3	A	5.54967	2.92428	0.1937	0.801074	-0.22276	0.0109739	1.21355	-0.730281	-0.730281	-0.730281	-0.730281	-0.245947	-0.730281	0.582217	-0.266782	0.150555
Gpr88	A	5.63592	3.34544	0.163853	0	0.232104	0	0	0.65323	0	0	0	0.225657	0	1.12253	0	0.280807
Fst	A	7.28717	3.91841	0	0.268547	1.12108	2.42504	1.49247	5.86316	0.902132	1.29991	0	0.975575	0	0	0.741531	0.121613
Chrdl1	A	4.35222	1.90036	1.08883	-4.09988	-4.47455	-2.5498	-2.58878	-1.85465	4.32753	-5.65899	2.786	-2.14011	-5.65899	-5.65899	-5.12666	-5.38935
Vegfc	A	7.15596	3.58524	0.109118	0.0382457	0.361687	1.14056	2.0976	1.4905	1.67388	0	0	1.45139	2.93379	0.351071	0.0838495	1.30648
Hmgcll1	A	5.28621	3.83756	0.0490341	1.58264	0.0959053	0.289778	0.307173	0.68405	0	5.9295	0	0.243991	0	1.12859	0.118277	0.0198437
Il34	A	6.50433	3.43144	-0.189937	-0.404733	0.312894	-0.478213	0.549189	0.69742	0.678526	3.85739	-0.751079	0.572801	-0.751079	1.47539	-0.152301	0.302918
Itga1	A	5.63677	3.49217	1.01886	-0.771443	-0.146921	0.276828	-0.716304	-0.26567	-0.590883	-1.20216	-1.20216	0.147834	-1.20216	-1.20216	-0.557641	-0.534743
Dpep1	A	7.83665	4.70627	-1.40376	-1.46205	-0.0559058	4.38058	2.59931	2.79909	4.80419	-1.65164	-1.65164	-0.191139	-1.65164	-1.65164	-1.44999	-1.39391
Serpina3g	A	6.85606	3.71482	0.0495609	0.265203	0.451484	0.993417	0.318195	0.103159	0.137203	0	0	0.0573993	0	0	0.0992336	0.0625398
Tmem176b	A	4.31968	2.24749	-1.16499	-1.77799	-2.96889	-0.529494	-6.32127	-0.172598	-5.49455	0.530766	-2.77547	-4.34231	-6.62736	-4.04701	-3.59183	-4.33117
Tmem176a	A	4.51093	2.21702	-0.49126	-0.432356	-3.12406	-3.83612	-4.91258	-1.32439	-4.26532	-5.22084	-5.22084	-4.01747	-5.22084	-4.81496	-3.35872	-3.31677
Gm4951	A	6.55882	4.04725	0.0788412	0.0940652	0.252624	0.272866	0	0	0	0	0	0	0	0	0.126653	0
Grem1	A	6.82528	4.49851	0.0859559	0.0567142	0.498255	0	0	0	0	0	1.54589	0.139209	0	0	0.521508	0.175155
Speg	A	5.97273	4.94575	1.94568	0.0515029	0.813082	0	0	0	0	0	0	0.438228	0	1.46059	0.190871	0.245753
Mme	A	6.93873	5.41075	0.0271929	-0.120701	0.324579	-0.121927	0.620664	0.0792878	-0.268639	6.8263	-0.695438	0.659278	6.59979	2.20378	-0.336408	-0.672922
Agt	A	8.42653	3.49282	1.35817	-0.538847	0.268654	3.80792	-0.413036	1.07603	0.379184	-0.632458	-0.632458	-0.423825	-0.632458	-0.415794	2.3029	-0.455653
Notch3	A	8.02873	4.72223	0.126856	0.153624	0.858994	0.787473	0.616632	2.15163	0.304651	0	0	0.103473	0	1.84161	0.0429811	0.0949235
S1pr3	A	6.99134	5.34289	-0.230039	-0.398128	0.794531	-0.566096	-0.370056	-0.394505	-0.298305	-0.566096	-0.566096	-0.233531	-0.566096	0.622849	-0.265345	-0.465411
Lpl	A	8.4614	4.14206	-1.34831	-1.1908	0.500089	7.49201	-0.345067	3.23318	-1.24228	3.29379	-0.00733669	0.497104	-1.55323	-1.33657	-0.882667	-1.36125
H2-Q7	A	6.50395	4.47963	1.48209	0.353341	0.906983	0	0.131309	0.149641	0.164179	0	0	0	0	0	0.601841	0.851891
Ccrl1	A	8.00296	4.73653	-0.526908	-0.401875	-0.0139043	-0.102813	0.495099	-0.686013	-0.118151	0.613898	-0.686013	0.526516	8.75485	4.88355	0.245808	-0.583105
Kng2	A	8.2557	5.32504	0.0948747	0	0.162554	1.25247	0.0784873	0	3.526	0	0	0.214323	0	0	0.0429811	0.0176105
Vcam1	A	8.69316	6.81994	-1.20283	-1.2173	-0.349124	1.42938	-1.1722	1.10158	0.216662	-1.48425	-1.48425	0.209636	-1.48425	1.59918	-1.14092	0.4636
Slc26a7	A	7.97651	5.32537	0.256175	0.0489976	0.542584	0.40717	0.0755348	0	0.18513	0	0	0.196193	0	0.667768	0.0371289	0.0414764
Hp	A	10.1731	6.47676	0.326963	-0.908612	0.673249	-0.491878	-1.05721	-0.111713	-0.498196	-0.274399	-1.57431	-0.887812	-1.57431	-0.837696	-1.07799	-0.960656
Adipoq	A	9.19703	5.45033	-0.174137	-0.422968	0.00763103	-0.618265	-0.478931	-0.618265	-0.533933	-0.618265	-0.618265	-0.398186	-0.618265	-0.618265	-0.370073	-0.47622
Kng1	A	8.03861	4.66088	0.0877243	0.0872434	0.175519	0	0	0	0.0797012	0	0	0.0724507	0	0	0.156376	0.0389727
Esm1	A	9.37405	5.72466	-0.409785	-0.515279	-0.193075	0.0725489	-0.276403	-0.672257	-0.672257	9.04495	-0.672257	-0.187612	-0.672257	-0.1467	-0.316003	-0.476374
Chl1	A	4.84189	1.6722	0	0	0.353876	0	0.724997	0	0	0	0	0.139924	0	0	0.0403383	0.0198437
Soat1	A	3.58679	0.769283	-1.45744	-2.83327	-2.9983	-1.33539	-1.20734	-1.73345	-1.38476	2.55874	-4.04861	-1.56698	2.62773	-2.25957	-0.926711	-1.25755
Snai2	A	5.66813	2.22778	2.30159	0.329029	-0.540118	1.14247	0.156894	1.42729	-0.848784	5.12963	-1.47771	-0.0662798	-1.47771	1.64523	0.322404	0.137212
Ptx3	A	5.8068	1.6853	0.556201	0.495446	0.512775	0.182251	1.94048	0	2.29976	0	0	0.629541	0	0.525557	0	0.549816
Serpina3f	A	4.87621	1.81706	0	0.0816444	0.279276	0.565943	0	0.105748	0	0	1.54589	0.0334154	0	0	0.0398223	0.0397493
Gpm6b	A	5.72367	2.41645	0.13111	1.77626	0.735837	2.32079	-0.271917	1.50973	1.29827	8.69968	-0.689753	1.43014	-0.689753	2.91644	0.42214	-0.577277
Trf	A	4.65128	3.24141	0.293692	1.01208	0.87371	1.03303	0.0653623	0.728135	0	0	0	0.279812	0	0.832559	0.160557	0.0515103
Susd2	A	5.42086	2.26396	0.0943475	0.671933	0.3064	1.53907	0.131719	2.82513	0.689557	0	0	0.623222	0	0	0.0609557	0
Hnmt	A	3.76851	1.27609	0.406227	0	0.163456	0	0.246123	0	0	0	0	0.0815064	0	0	0	0.0461924
Pde2a	A	4.01954	1.82548	0.399424	0	0.652448	0	0.4631	0	0	0	0	0	0	0	0.0752961	0.041512
H2-Q5	A	2.66836	1.1265	0.137807	-0.541087	0.168813	-0.237634	-0.518681	-0.0836578	-0.306899	-0.724408	-0.724408	-0.388474	1.85594	-0.31852	-0.403224	0.0318584
Igfbp3	A	4.90966	2.43664	0.0950716	0.296292	0.393455	0.696948	0.387268	0	0.745301	0	0	0.981196	0	0.216664	0.086348	0.391476
Mdk	A	6.45331	4.10344	0.403217	1.24533	1.09314	1.33261	0.0615154	0.821195	0.155301	8.16046	0	0.650151	0	2.0659	0.35565	0.136203
Mdk-ps1	A	2.8426	1.83835	0.176514	0.240786	0.457679	0.701683	0	0.17159	0	4.84702	0	0.294935	0	1.20406	0	0.0954983
Slc16a4	B	1.13986	0.667139	4.84356	2.06027	0.40644	1.04273	0	0	0	6.90006	0	0.575189	0	0.995926	0.384001	0.231163
Kctd4	B	0.227143	0.0533659	3.05707	0.881516	0.279871	0	0.33692	0.693519	0	0	0	0.329476	0	0	0.181103	0.0509202
Slc13a5	B	0	0	5.42937	0.30268	0.278346	0	0	0	0	0	0	0	0	0	0	0
Slc6a1	B	0.107887	0.0636436	4.64129	0	0	0	0.0716772	0	0	0	0	0	0	0	0	0.017425
Panx3	B	0.059389	0.121289	7.02876	0.0382457	0.216147	0	0	0	0	0	0	0	0	0	0	0
Matn3	B	0.268416	0.186491	9.67204	3.25781	0.324026	0	0.0515136	0	0	0	0	0.0282672	0	0	0.138171	0
Wisp3	B	0.0523003	0	5.04977	0.082871	0.0314252	0	0.121123	0	0	0	0	0	0	0	0.0801694	0
Fxyd2	B	0.0350504	0.059288	8.84165	0.293373	0.170548	0	0	0	0	0	0	0.0786565	0	0	0	0.161562
Syt8	B	0.0165292	0.079734	5.8912	1.10242	0.109417	0	0.412067	0.105748	0.0786833	0	0	0	0	1.63315	0	0.0176105
Serpina1d	B	0.188445	0.255289	7.16302	0.117195	0.33821	0	0	0	0	0	0	0.0724507	0	0	0.035837	0.0217846
Serpina1a	B	0	0	5.49207	0	0.132596	0	0	0	0	0	0	0	0	0	0	0
Efcab1	B	0.187096	0.0681989	4.9635	1.48409	0.0281891	0	0	0	0	0	0	0	0	0	0.0713766	0
Gramd2	B	0.067494	0.0529507	6.94433	1.87142	0.151725	0	0	0	0	0	0	0.104602	0	2.11617	1.64554	0.435064
Prss50	B	0.00950414	0.0245856	4.56653	0.238374	0.128489	0	0	0	0	0	0	0.071862	0	0	0.0996244	0.224046
Rspo4	B	0.566506	0.291527	6.47962	0	0.0333825	0	0	0	0	0	0	0	0	0	0	0.99219
Epyc	B	0.0266897	0.0857252	8.04141	1.38449	0.178826	0.656325	0.64016	1.5515	0.91596	0	12.0108	1.1842	0	0	0.134594	0.0448666
Stc2	B	0.0313726	0.120248	3.99851	0.753681	0.158672	0	0	0	0	0	0	0	1.41158	1.52893	0	0
Gm13500	B	0.0534559	0	3.02621	0	0.171871	0	0.181256	0	0.208027	0	0	0.0979182	0	0.230518	0.253621	0.161092
Batf3	B	0.0294114	0.0468645	3.50371	0	0.238224	0	0	0	0	0	0	0.106243	0	0.216664	0.0675682	0.202467
Smim5	B	0.202655	0.0944981	4.59358	0.129782	0.420087	0	0	0.171436	0	0	0	0	0	0	0.0928123	0.12511
Ppa1	B	0.673067	0.47867	10.2568	3.40307	1.30452	3.77384	2.99767	0.381447	4.25703	1.80403	-0.168396	1.83697	-0.168396	1.26896	3.56926	3.9406
Kif26b	B	0.414124	0.117342	4.77203	1.56839	0.102752	0	0	0	0	0	0	0	0	0	0	0.0480209
Rap1gap	B	0.187653	0.298663	3.48593	0.0489976	0.516775	0	0	0	0	0	0	0	0	0.470368	0.0585081	0
Tnni2	B	0.0250729	0	2.66531	0.565849	0.0111354	0	0.284767	0	0	0	0	0	0	1.49683	0.375542	0
Gm12349	B	0	0.0299439	3.56099	0.161658	0.232476	0	0	0	0	0	0	0	0	0	0.506107	0.147564
Slc6a12	B	0.0169294	0	3.93823	0	0.161807	0	0	0.186949	0	0	0	0	0	0	1.70981	0.0764289
Cpa6	B	0.797325	0.408901	5.44308	0.274207	0.0738734	0	0	0	0	0	0	0	0	0	0.0403383	0
Wscd2	B	0.0945812	0.126728	4.92989	0.908453	0.188378	0	0	2.13178	0.168787	0	4.46717	0.533977	0	0	0.647955	0.139485
Fam89a	B	0.37176	0.147477	5.03485	0.933566	0.0921804	1.20124	0.151805	0	0	0	0	0	0	0	0.806278	0.017425
Nrtn	B	0.0240891	0.061761	4.07285	1.08491	0	1.3122	0	0	0.0843322	0	0	0	0	0	0.352601	0.272381
Tmie	B	0.0509291	0.350064	4.55048	0.119178	0.126797	0	0	0.290108	0	0	0	0.0941583	0	0.439884	0.713745	0.0624592
Rhbdl2	B	0.0276508	0.0234322	3.39897	0	0.280247	0	0	0	0	0	0	0.0402273	0	0	0.0472431	0
ENSMUSG00000103061	B	0	0	4.1459	0.862937	0.0152491	0	0	0.438012	0	0	0	0.27177	2.58035	0	0.549879	0
Smpd3	B	0.267982	0.157607	8.71708	0.623315	0.629657	0.514697	1.90154	0	0.336333	0	0	0.0985083	0	0	0.521823	1.61036
F5	B	0.673502	0.365455	6.67915	0.962121	0.657638	0	0.503427	1.06319	0.438278	0	0	0.196035	0	0.559985	0.747223	0.4286
Scrg1	B	0.0586575	0.0548634	8.27646	3.07492	0.436667	0	0	0	0	0	0	0	0	0	1.74452	0.237477
Foxa3	B	0.0171619	0.121497	5.19151	1.10676	0	0	0	0	0	0	0	0	0	0	0.972233	0
Car12	B	0.0710457	0.141936	6.62671	0	0.208024	0	0	0	0	0	0	0.0298203	0	0.216664	0.645409	0.0348147
Prkg2	B	0.13591	0.0543977	8.5305	0.0550524	0.0851402	0	0	0	0	0	0	0	0	0	0.682627	0.0948798
M1ap	B	0.276126	0.0564693	4.09075	0	0.0387999	0	0	1.56604	0	0	0	0.163743	6.83161	0	0.671345	0
Calml3	B	0.0126665	0.240041	2.98498	0.0421077	0.0841471	0	0	0	0	0	0	0.0812521	0	0	0.0403383	0.0178889
Steap1	B	0.0839797	0.196792	4.51814	0.453039	0.0965673	0	0.454571	0.103159	0	0	0	0.161315	0	0	1.15448	0.642589
ENSMUSG00000106121	B	0.398195	0.0931972	4.84438	0.0421077	0.115618	0	0.382738	0	0.7382	0	0	0.832158	0	0	0.0643253	0
Hs3st3b1	B	0.0870788	0.182934	4.12264	1.94219	0.0842099	0	0.430871	0.297848	0	0	0	0.438234	0	1.33731	0.859903	0.0178889
Ephb2	B	0.0703138	0.323287	4.50148	1.48456	0.213513	0.799488	0.057298	1.44289	0.889475	0	0	0.626056	0	1.03191	0.336849	0.13782
Unc5c	B	0.904288	0.344377	6.55773	2.68359	0.433928	2.63169	0.303746	0	0.0786833	0	0	0.140075	0	0.351071	0.684481	0.737057
1700088E04Rik	B	0.195651	0.114268	3.25452	0.24038	0.135098	0	0.362456	0	0.385983	0	0	0.0939844	0	0.790592	0.855135	0.338843
Batf	B	0.419447	0	3.70069	0.880859	0.0831402	0	0	0	0	0	0	0	0	1.07562	0.457302	0.0214189
Cbr2	B	0.0264523	0	2.34055	0.511332	0.0950917	0	0	0	0	0	0	0	0	0	0.826583	0.101052
Sfn	B	0.0375097	0.0770962	3.21168	0.864534	0.212168	1.12418	0	0	0	0	0	0.119682	0	1.01349	0.741665	0.107628
Tube1	B	0.075037	0.261436	2.76731	0.583324	0.0744673	0	0.073379	0	0.0926938	0	0	0.0560434	0	0	0.555164	0.0907634
Myh14	B	0.0405525	0.0908661	2.04846	0.608177	0.439704	0	0	0	0	0	1.54589	0.0353214	0	0	0	0.0231564
Chadl	C	0.543736	0.572723	8.64666	6.018	0.509307	1.40122	0.560119	0.149641	0.245661	0	0	0.087905	0	0	0.628267	0
Slc38a3	C	0.0895348	0.0898898	7.71667	4.84563	0.0259576	0	0	0	0	0	0	0	0	0	0	0
Ncmap	C	0.0831362	0	6.67282	5.00922	0.408913	0	0	0	0	0	0	0	0	0.216664	0.272047	0.054711
Extl1	C	0	0.0177436	4.00242	2.27407	0.0549038	0	0	0	0	0	0	0	0	0	0	0
Gjc3	C	0	0.0149075	3.51647	1.59681	0.200536	0	0	0	0	0	0	0	0	0	0.227752	0
Cmtm5	C	0.00717523	0.0242637	2.40257	2.42712	0.115658	0	0	0	0	0	0	0	0	0	0	0.0192051
Fxyd3	C	0	0	2.68997	3.67543	0.202136	0	0	0	0	0	0	0	0	0	0.431388	0
Vill	C	0.667573	0.244545	3.57932	4.54596	0.273201	1.22092	0	0.171436	0.786191	0	0	0.155858	0	0	0.39384	0.153773
Chi3l1	C	0.214928	0.27924	3.7279	6.72037	0.713814	0	0	0.16295	0	0	0	0.107475	0	0.405889	1.32583	0
Gpr3	C	0.0105999	0.0940657	2.23197	1.31238	0.056128	0	0	0	0	0	0	0.117994	0	0	0.362629	0.0504481
Nebl	C	0.230344	0.289886	2.66593	1.46172	0.224337	0	0	0	0.163016	0	0	0.203374	0	0	0.661941	0.0448529
Pitpnc1	C	2.20532	1.46655	5.11189	5.72867	1.31149	1.74772	0.0623417	0.105748	0.697207	0	0	0.520924	7.2007	1.98763	0.111133	0.629587
Mdfi	C	1.07961	0.626512	3.24545	2.32702	0.158942	0	0	0	0	0	0	0	0	0	1.0162	0.21284
Col27a1	C	2.371	1.45479	7.75493	5.88656	-0.150671	-0.355564	-1.51667	0.345247	-1.4981	5.53055	-1.58258	-0.114943	-1.58258	1.58803	3.71364	-0.652871
Notum	C	0.0639599	0	3.00977	2.11337	0.155851	0	0.164279	0	0.14867	0	0	0.371775	0	0.216664	0	0
Mcoln2	C	0.0295289	0.255887	2.87551	2.41962	0.012645	0.963004	0.271437	0	0	0	0	0	0	0	0	0
Sox8	C	0.0153195	0.0148358	3.45993	2.67821	0.22071	0.435439	0.127425	0.839182	0.338249	0	0	0.198565	2.11122	0	0.417152	0.0322294
Nrk	C	0.0451977	0.0545994	4.24746	1.98504	0.110004	0	0.492847	1.75072	0	0	0	0.208103	0	0.448764	2.30336	0
Rab27a	C	0.0506001	0.0538725	3.10605	2.70185	0.152855	0	0	0	0	0	0	0	0	0	0.861732	0.120735
Bmp7	C	0	0.102901	4.09042	2.13896	0.762723	0	0	0	0	0	0	0.0382156	0	0	0.501939	0.0742695
Scube1	C	0.16125	0.161415	4.33553	4.12413	0.704797	0	0.172878	0	0	0	0	0.492388	0	0	1.15592	0
Impa2	C	0.401041	0.484631	4.72809	2.92463	0.396534	0	0	0	0	0	0	0	0	1.49293	0.660849	0.162309
Prkcz	C	0.0143431	0.0293103	2.50382	2.70425	0.053543	0	0	0.105748	0.541533	0	0	0	0	0.216664	0.442619	0.0494183
Chad	C	0.228864	0.0762034	11.4254	11.3899	1.3248	-0.404083	-0.8177	2.64257	-1.02723	-1.39804	9.33821	1.17549	-1.39804	0.8972	4.47784	-0.724366
Pla2g5	C	0.0306887	0	5.39955	5.1512	0.369254	0	0	0	0	0	0	0.498865	0	0	1.03371	0
Ppp1r1b	C	0.0387783	0.0965256	5.76365	5.32762	0.076771	0	0	0	0	0	0	0.440134	0	0	2.79225	0
Col11a2	C	0.543303	0.476203	10.9387	8.79599	1.67698	0.893093	0.275857	0.465296	0	0	0	0.237878	0	0	3.03629	0.160917
Mia	C	0.116883	0.217475	7.0736	4.51405	0.207041	0.224918	0	0	0	0	0	0.132313	0	1.01426	0.542738	0
Col9a2	C	0.378867	0.239233	10.9083	8.52299	0.750744	0	0	0	0	7.37696	0	0	0	0	2.52001	0.0226973
Col2a1	C	1.05737	1.31985	14.1322	11.1744	1.98807	0.47203	0.206739	0	0.406234	0	0	0.489297	0	1.45853	4.84952	0.192652
3110079O15Rik	C	0.0975679	0.0759072	8.91144	6.33094	0.392581	0	0	0	0	0	0	0	0	0	1.22992	0.0185241
Lect1	C	0.535222	0.575014	12.0899	10.2301	1.17865	0	0.3436	0.103052	0	0	1.54589	0.0814298	0	1.48334	1.40875	0.0907695
Col9a3	C	0.359984	0.264064	11.464	8.00291	0.60288	0	0.443739	0	0.0844776	0	0	0.203805	0	0.351071	1.28644	0.0910239
Col9a1	C	0.191536	0.238933	10.6005	8.28654	0.355466	0	0.0653623	0	0	0	0	0.086171	0	0.230518	1.74742	0.0225158
Ldlrad3	C	0.546629	0.918061	6.25581	5.69817	0.992372	2.18806	1.35701	2.7265	1.06403	1.97243	0	2.18732	0	4.12991	3.76217	1.19612
Gm973	C	0.190481	0.106111	2.98757	1.94625	0.234376	0	0	0	0	3.82367	0	0.32138	0	0.762611	0.759287	0.0752093
Cybrd1	C	0.0352612	0.0207322	2.86235	1.50203	0.33843	0	0	0	0	0	0	0.795731	0	0	0.65247	0.106929
Igdcc4	C	0.669978	0.197785	4.5867	3.95809	0.357914	0.431406	2.06514	1.66599	0.489567	5.11391	0	0.893415	0	1.00475	1.28311	0.511512
Ifitm10	C	0.00974836	0	2.90321	2.9548	0.0691178	0	0	2.12945	0.0844776	0	0	0	0	1.17028	0.203985	0.903747
Wnk4	C	0.164498	0.363532	2.33076	2.83636	0.272355	1.15382	0	0	0	0	0	0.32323	0	0	0.41073	0.0736394
Tnfrsf10b	C	0.109071	0.0416265	2.71813	1.68397	0.270171	0.784651	0.691153	0	0.0760936	0	1.54589	0.634966	0	0	0.963967	0.441562
Lef1	C	0.318191	0.0805506	2.10056	2.33182	0.0403529	0	0	0	0	0	0	0	0	0.762611	0.0585081	0.0192051
Fgfr3	C	2.90279	3.20122	7.7676	6.75109	1.19756	0	0.275828	0.105748	0	0	0	0.964811	0	0	3.18954	0.691668
Lmcd1	C	1.50382	0.524349	6.20491	3.01428	0.415041	0	0.293606	2.17884	0.654505	4.51929	1.54589	1.12024	9.06056	0	1.26901	0.0505266
Peg3	D	1.16677	0.880548	7.77731	6.88737	2.22077	3.30855	2.97275	3.87471	1.34065	10.2839	9.53166	2.45365	8.56812	4.57038	6.35992	0.898846
Edil3	D	0.392014	0.214358	5.31803	5.59994	0.761333	0	0.394308	1.18488	0.0844776	7.64278	8.32919	2.38818	0	4.36705	3.84683	0.374433
9930013L23Rik	D	0.158796	0.480062	5.58514	6.6312	0.568792	0	0.191295	0.715739	0.445387	2.7758	5.55693	0.41198	0	2.19391	3.37513	1.7127
A830039N20Rik	D	0	0.0178746	2.58529	2.38277	0.145276	0	0.0515136	0	0	0	4.19209	0.471776	2.93379	0	2.68606	0
Sox9	D	0.367393	0.131583	8.25748	5.98557	1.00849	-0.417414	0.66447	-0.260112	-0.849523	6.85594	0.263665	1.2926	4.92825	3.54104	6.82093	2.17775
1500015O10Rik	D	2.01822	2.1408	7.74101	8.36062	1.68884	0	0.881376	4.00989	0.183753	8.85953	6.97488	3.80183	8.94867	7.67244	8.35983	0.348781
Rab11fip4	D	0.257198	0.239704	4.44684	6.32438	0.842591	0.97446	0.0653623	0.625536	0.14867	0	0	0.110993	0	1.4433	5.51594	0.0617961
Fam101a	D	0.0628783	0.0248653	4.10156	4.97781	0.337334	0	0.143234	0	0.0786833	0	0	0	0	1.49285	3.57746	0.494713
Fmod	D	-0.193524	-0.403716	8.44673	9.02572	0.574244	0.363612	0.15294	2.39835	1.92589	2.54074	10.6276	5.52677	6.28895	10.8641	9.59714	-0.831419
Kcnma1	D	0.129936	0.461494	7.30368	6.74237	2.09273	0.431406	1.00521	0.973021	1.91553	0	9.41478	3.37513	3.99481	4.84051	7.54508	0.308205
Crispld1	D	0.424348	0.378211	8.39893	6.49787	1.22712	3.06468	0.797639	1.27487	1.73047	7.12828	0	2.27302	0	3.37986	7.03965	0.0905798
Tspan13	D	0.263938	0.579623	6.16668	7.53037	1.06013	0	0.176928	0.385559	0.0843322	0	1.54589	0.0950582	0	4.04253	5.38157	0.230372
Trpv4	D	0.738248	0.379246	7.83501	4.40438	0.3257	0	0.140882	0.263908	0	0	0	0.106434	0	1.2223	5.09238	1.24693
2610018G03Rik	D	0.0898614	0.0453023	5.37754	5.02229	0.721785	0	0.272819	0	1.17289	0	0	0.423645	0	0	3.90504	0.179329
Col11a1	D	0.852191	1.07422	10.7435	8.38883	1.83954	0.289778	0.117423	2.77664	0.0843322	1.29991	8.38825	3.01694	8.54266	2.23894	7.74212	0.169843
Susd5	D	0.173783	0.143528	8.04763	8.54306	0.825797	0	0.0716772	0.186949	0	0	2.27492	0.165231	0	2.55661	5.41163	1.53703
Ucma	D	0.172605	0.221898	8.40746	6.98726	0.532441	0	0	0	0	0	0	0.0518439	0	0	4.59167	0.0480562
AC110520.1	D	0	0	4.30695	2.82032	0.115717	0	0	0	0	0	3.40589	0	0	1.79663	2.24121	0
Acan	D	0.374798	0.458813	11.3313	9.63024	1.31653	0.400948	0.0653989	0.364549	0	0	7.94685	0.540919	10.2737	8.46938	8.18162	0.130539
Hapln1	D	0.257365	0.269841	10.5854	8.06429	0.584731	0.562554	0	0	0	0	6.28159	0.658382	1.41158	4.62292	8.11867	0.323901
Capn6	D	0.0841624	0.320069	5.52522	2.62475	0.626273	0	0.495771	1.2486	0	0	0	0.854445	0	1.72563	3.999	0.210583
Gm11547	D	0.0136261	0	4.24513	3.20467	0.260934	0	0.33602	0.722676	1.71179	0	0	0.767869	0	2.18128	2.38804	0.796345
Camk4	D	0.21629	0.600457	4.54682	5.19756	0.99097	0	0.411886	0.19861	0.0844776	5.57859	0	0.869583	8.64792	6.56009	4.2425	0.0511529
Shisa2	D	0.291546	0.736584	5.74787	5.25593	0.928522	0	0.0659098	2.67316	0.130743	0	6.83632	1.28676	5.40963	4.90986	3.51732	1.4632
Sox6	D	0.0856006	0.245497	5.29142	4.56418	1.34413	0	0.537195	1.20582	0	0	8.27657	1.8189	4.49721	4.95765	5.39901	2.34308
Cspg4	D	-0.891489	-0.634293	7.31549	6.95515	1.1685	-1.23712	2.03506	4.11628	3.01236	4.94566	3.66001	3.13663	6.02728	3.21592	7.20789	6.24464
Nfatc2	D	0.133019	0.426499	6.50572	4.33708	1.13427	2.75645	1.58654	0	2.90933	0	0	2.46649	0	2.49239	5.96625	1.54801
Wwp2	D	-0.435896	-1.11863	5.46337	5.62573	-0.246295	-1.36628	-0.211001	-0.436093	-0.778432	-2.87855	2.34939	0.959194	1.81656	3.0592	3.45702	0.806084
Tmem56	D	0.0107296	0.235397	2.1156	3.81381	0.35791	0.182251	0.253247	0.16295	0.267516	6.67083	0	0.467936	0	1.54973	2.61918	0.108122
Gpr126	D	0.145264	0.263423	2.66917	5.56719	0.694111	0	0	0	1.9703	0	0	0.351716	0	0	2.48785	0.221058
Chst11	D	1.70339	-0.485965	6.86713	4.31915	-0.586233	-0.210944	-1.22613	-1.02772	0.60025	-0.561849	-0.315865	-0.0144183	-1.86176	1.25534	3.70349	2.27098
Ica1	D	0.234811	0.383735	4.57383	2.11579	0.290415	0	0	0	0.0994206	0	0	0.0793138	0	0.730904	3.6383	2.10593
Mfi2	D	0.110027	0.152383	8.11977	5.58859	0.638291	0	0	0	0.0758882	0	0	0.105666	0	0	9.0539	0.101752
Clec3a	D	0.0959694	0.128781	7.32045	3.57207	0.505908	0	0.0727028	0.186949	0	0	0	0.219437	0	0.447182	6.61031	0.0269814
Mall	D	0.0660897	0.0149075	2.95893	2.31059	0.141948	0	0.0653989	0	0	0	0	0	0	0	3.63733	0
Eps8l2	D	0.121199	0.111927	4.74838	3.65837	0.524598	0	0.297303	0.912843	0.0760936	0	0	0.539716	0	0	5.28511	0.360712
Cytl1	D	0.547596	1.01468	6.26548	9.67828	0.91243	2.67381	-0.0122684	-0.690519	-0.690519	-0.690519	-0.690519	-0.120592	0.72106	0.00387256	7.20926	0.0694222
Scin	D	0.0521852	0.0408477	3.76887	4.66843	0.260441	2.30784	0.436399	0.918134	0.286492	0	0	0.45487	0	0	4.2633	0.384788
Kcna6	D	0.0140545	0.0594606	2.98951	3.63061	0.274291	0	0	0	0	0	0	0	0	0	2.72016	0
Itih5l-ps	D	0.0788263	0.0521623	2.53348	4.89429	0.199285	0	0	0	0.0758882	0	0	0.0812521	0	0	4.56577	0.15135
Kif21a	D	0.0883267	0.0449959	4.32189	4.62646	0.589055	0.680036	1.34459	0.612479	3.05457	0	0	0.916109	0	2.92191	5.57891	2.29855
Ninj2	D	0	0	2.58055	0.847822	0.0686807	0	0	0	0	0	0	0	0	0	1.06087	0
Hhipl2	D	0.059185	0.016584	2.41433	0.976653	0.0745255	0	0	0	0	0	0	0	0	0	1.99648	0
Cobll1	D	0.378133	0.298631	5.15452	1.76768	0.6098	0.832355	0.199457	0	1.91855	0	0	0.739373	3.99481	1.34406	3.25512	0.593092
Mgat4a	D	0.970135	0.77977	6.22494	6.15341	1.38569	3.97847	0.778951	4.69905	1.2997	0	0	1.51439	0	1.99141	4.13835	1.69129
Zfp385b	E	0.239039	0.232053	4.73654	4.40814	0.488808	0.224918	0.883239	0.795326	0	0	0	0.637045	0	0.525557	4.32091	6.61323
Cpe	E	-1.04007	-0.417377	6.62163	6.87038	2.21958	-0.0184239	-0.350971	1.96524	3.09647	7.04281	-1.67361	1.54359	0.437612	3.62677	6.82407	8.04991
Hbegf	E	-0.255619	0.0440066	6.28238	4.10158	1.36652	0.281736	-0.623019	4.27872	-0.16086	4.88961	7.2183	1.72007	4.20871	0.573835	6.00912	8.81996
Sox5	E	0.0505403	-0.390881	4.35993	3.7375	-0.722088	-1.0037	0.302503	-0.680634	0.244893	-2.05463	6.57651	0.799371	1.39977	3.58832	5.09997	5.22983
Dusp14	E	0.0432238	0.0461805	2.49242	2.05792	0.401272	0.597097	1.90233	0	0	0	1.54589	0.524516	0	0.211056	3.76736	4.51551
Thrb	E	0.455792	0.517117	3.17965	1.90839	0.628736	1.64061	2.57449	2.63654	1.83753	4.42424	2.75693	2.34056	0	1.92884	2.86021	4.60514
Fxyd5	E	-1.65313	-1.75697	1.8614	4.84342	0.374266	0.917246	1.99737	-0.533459	0.912122	3.58473	-2.78821	3.92438	-2.78821	5.15345	5.73115	5.30705
Ninj1	E	0.057342	-0.33877	2.33406	2.63638	1.94062	0.936249	2.14297	1.41386	3.88946	-0.971354	6.88278	2.26654	7.04179	-0.740836	6.62163	5.83979
Gch1	E	0.0286349	0.0835067	1.83573	2.31538	1.02055	1.57359	1.22658	0.641114	4.02172	0	1.54589	1.20899	0	0	4.61076	4.07115
Higd1a	E	0.248023	-0.0681121	2.72155	0.731186	0.439447	0.602859	2.66372	0.708217	1.12077	-0.82061	0.725285	2.26463	-0.82061	1.54795	3.97541	4.51204
Gm9790	E	0.550327	0.462283	2.40458	1.1923	0.89568	0.289778	1.98625	0.639642	1.22299	0	0	1.60441	0	1.34807	3.09168	3.79537
Cdr2	E	0.743484	0.269093	2.8507	2.18717	1.13816	2.84417	2.09739	2.18494	3.64549	0	0	2.48108	0	0.211056	3.57441	5.52309
Ccbp2	E	0.0744557	0.101112	0.409245	0.57773	0.0526806	2.00219	3.90456	0	0.743967	0	0	0.761168	0	2.02107	3.80748	4.02422
Inhba	E	0.609139	0.389426	1.46938	0.248419	0.628234	1.571	2.72367	2.65306	2.59558	0	0	2.35503	0	1.88021	4.43007	5.55506
Apold1	E	0.17673	0.265365	0	0.128652	0.100896	0.289778	0.131272	0.103159	0	0	0	0.238608	0	0	0.956149	3.29467
Doc2b	E	0.0599201	0.0478342	0.133252	0.0679446	0.122352	0	0.280626	0	0.0994206	3.05497	5.30001	0	0	1.54973	0.43536	2.60324
Prg4	E	-1.10736	-1.70892	-2.06692	0.147769	-1.02112	2.0367	2.11119	4.48587	2.59087	4.76885	4.12553	3.63251	1.08323	-0.762806	7.23538	11.4002
Htra4	E	0.45231	0.519773	0.0893594	1.56376	1.11198	2.33878	1.03781	1.13296	1.30077	3.82367	1.54589	1.69424	0	0.838849	7.06135	10.6399
Aldh1a3	E	0.345991	0.217551	0.746204	1.45845	0.392783	2.39343	1.25522	0.941761	0.397513	0	0	0.991098	2.11122	2.02701	2.99553	6.76671
Gprc5a	E	0.191143	0.372544	2.52994	0.623939	0.531949	1.28915	1.72137	0.103052	1.60171	0	0	0.965006	0	0.216664	2.95641	6.12873
Pcsk6	E	-0.564033	-0.424412	3.44638	1.92485	0.670699	1.0743	6.97569	0.28135	3.75603	0.0956201	-1.20429	2.41697	-1.20429	-0.0219514	2.33246	8.6825
Barx1	E	0.0124059	0.0282805	0.0432623	0.957441	0.0104371	0	0	0	0.175309	7.18737	0	0.270479	0	0.25726	3.65449	3.08544
Stk32b	E	0.0438489	0.101283	1.1007	2.78889	0.145192	0.435439	2.13517	0.647339	0.664798	0	0	0.788391	0	1.36337	3.55105	3.55111
Rasgef1a	E	0.0417268	0.0980567	0.27402	0.248419	0.025994	0	1.10642	0.103159	0.552828	0	0	0.239886	0	0	1.89078	2.99673
Acp5	E	0.0709091	0.155534	0.206886	0.790784	0.7185	5.77884	0.33792	0.19861	0.779899	0	0	0.901794	0	3.20419	1.8979	4.38656
Cdr1	E	0	0	0.069933	0	0.153432	0	0	0.327439	1.01532	0	0	0.633122	0	0	1.36279	1.8893
Scara3	E	0.0020634	-3.35833	-4.39585	2.89228	-3.83846	-0.0636449	-0.579809	-0.374601	-1.46903	-2.33258	1.47921	-0.314752	3.5098	1.01289	2.62764	2.14078
A4galt	E	1.11034	0.666208	0.758167	1.20639	0.940893	1.22537	3.00383	3.46887	3.06669	3.96545	0	2.01503	7.96603	0	3.70833	5.59499
Lnx1	E	0.098969	0.352622	0.0795556	0.0421077	0.340697	0	2.20968	2.53705	0	0	0	1.29854	0	2.82523	2.05169	3.71885
Metrnl	E	0.0149555	0.179708	1.02224	0.531149	0.323875	0.988934	5.18191	0.0266745	2.50421	5.28838	2.6896	3.25867	-1.64657	-0.988314	2.25481	6.43866
Gnpnat1	E	1.00506	0.465261	1.61555	0.689484	0.991237	2.69916	4.67158	1.06453	2.72065	0	4.19209	1.12878	0	1.1182	2.26676	6.02185
Dok5	E	0.069792	0	0.215469	0	0.15107	0	0.668986	0.16295	0	0	0	0.037938	0	0	0.634592	3.3459
Rgs5	E	0.507486	0.246434	0.041583	0.241732	0.360619	0	0.151866	0.398792	0.37102	0	0	0.15014	0	0	0.0890138	5.48004
Gchfr	E	0.0154818	0	0.206635	0.0816444	0.314894	0.289778	0.0716772	0.103159	0	0	0	0	0	0	0	3.18363
Tmem196	E	0.0136261	0.0222517	0	0	0.0506504	0	0	0	0	0	0	0.0288822	0	0	0	3.5035
Col22a1	E	0.0923916	0.214991	0.0695061	0.11695	1.14741	0.673815	0.187234	0.321076	0.16881	0	0	0.102167	0	0	0.535112	8.14827
Megf10	E	1.1619	0.836508	0.280946	0.34999	0.872232	0	0	0.103159	0	0	0	1.09709	0	0	0.0838495	6.7902
Trhde	E	0.0251942	0	0	0.42488	0.252509	0	0.073379	2.22754	0	0	6.93015	0.168488	0	0	0	3.68343
Hid1	E	0.0584701	0.0574408	0.369763	0	0.415961	1.2634	0	0.304358	0	0	0	0.0811523	0	0	0.440609	3.49563
2210407C18Rik	E	0	0	0	0	0.0846076	0.272866	0	0	0.0844776	0	0	0.0518439	0	0	0	2.35316
Sdk1	E	0.0715263	0.0469682	0.169802	0	0.274375	0.890442	1.29351	1.1462	0	0	0	1.10711	0	0	0.0838495	3.71031
Kcnc2	E	0.028619	0.0428913	0.0670337	0.0550524	0.0691756	0.985292	0.674873	0	0.509679	0	0	0.296342	0	0	0.0371289	2.90917
Fam134b	E	0.226326	0.188616	0.98189	0.856041	0.746954	0	0.481832	0.266109	0.220318	5.89446	6.57096	1.81344	0	2.69898	1.90456	4.92515
Procr	E	0.256952	0.229024	0.830923	0.629528	0.295672	2.16519	5.87578	2.09767	6.34886	0	0	1.23205	0	0	1.99724	7.19365
Prune2	E	0.0865923	0	0.687512	0	0.363971	0.40717	2.1023	0.16295	2.17915	0	0	0.856275	0	0.849573	0.824433	5.20572
Grid2	E	0.0143304	0.183833	0.96379	0	0.15155	0	0	0	0	0	1.54589	0.0314376	0	0	0.244409	2.56484
Ttll7	E	0.197349	0.245784	0.354825	0.810784	0.236504	0	0	0.103052	0	0	0	0	0	0	0.385095	3.77063
Sv2c	E	0.209116	0.110377	0.0892811	0	0.0503617	0	2.91324	0.346731	0	0	0	0.88622	0	0	0	5.3239
Pkp1	E	0	0	0.363692	0	0.0382763	0	0	0	0.0844776	0	0	0.0291321	0	0	0	2.73934
Calcrl	E	0.398637	0.55888	0	0.0897486	0.855973	1.89629	1.82724	0.103159	1.15751	0	0	0.59179	0	0.211056	0	6.663
Dlx3	E	0.0746412	0.0245856	0.209337	0	0.248662	0	2.45356	0.103159	0	0	1.54589	0.518844	0	0	1.03082	4.36609
Gm17455	E	0.0171619	0	0.85519	0.892685	0.252486	2.05535	1.27985	0.103159	1.30917	0	1.54589	1.94498	0	0.211056	3.66371	5.56325
Cmtm8	E	0.022894	0.0382659	0.40673	0	0.100304	0	0	0.381406	0	0	0	0	0	0	0.0774126	2.64909
Matn4	E	0.134848	0.212375	2.18909	2.64747	0.461628	0.289778	0.406103	0	0.0994206	0	1.54589	0.0314376	0	3.54441	1.60977	6.10446
Sema3a	E	0.15615	0.0489664	0.0495609	0.478142	0.326272	0	1.7445	0.768022	0	1.29991	0	0.860414	1.41158	0	0.858675	5.18675
Itga6	E	0.390604	0.389843	2.63916	2.08668	0.591971	0.804878	0.841873	1.2071	2.109	0	0	2.36488	0	0.831099	1.38122	6.70333
Tmod1	E	0.0661404	0.119324	0.195427	0.129715	0.391252	0	0.168829	0	1.15956	0	0	0.21778	0	0	0.0838495	3.91613
Cystm1	E	0.223306	0.451818	1.71631	0.776743	1.06955	1.0689	0.690813	0	1.16577	0	0	0.178818	0	0.230518	1.52338	6.20174
Gpr1	E	0.111817	0.0842663	0	0.183321	0.0675633	0	3.18515	0.208908	0	1.29991	0	0	0	0	0.136783	4.82554
0610040J01Rik	E	0.0145368	0	0	0	0.144884	0	0	0	0	0	0	0	0	0	0.366524	3.31107
Rab37	E	0.10271	0.0420016	0.041583	0.0816444	0.127046	0	0.453203	0	0.0844776	0	0	0	0	0	0.0933288	4.48674
Sema3f	E	0.165827	0.268633	0.150072	0.474004	0.489205	0	0.301102	0.395857	0.210129	0	0	0.435381	0	0	0	4.56418
F13a1	E	0.342943	0.382782	2.51051	3.95586	0.866595	0.272866	1.85138	1.04295	0.849368	1.29991	0	0.581987	0	0.211056	0.204481	10.3866
Clic5	E	0.563329	0.746346	0	0.240702	0.332975	0	0.791063	0.321076	0.309096	0	0	0.334619	0	0.211056	0.0838495	8.0972
Tspan15	E	0.076248	0.282065	0.0836181	0.145777	0.449125	0	0.46038	0.30177	0.160426	1.29991	0	0.612316	0	0.211056	0.642979	8.13156
Gm12680	E	0	0	0	0	0	0.37295	0.364336	0.149641	0.137203	0	0	0	0	0	0	1.84691
Mfap3l	E	0.0328035	0.0655068	0.585746	0.245548	0.571018	1.2925	3.36976	0.255389	4.0834	0	0	1.05123	0	0	1.51144	4.8793
Khdrbs3	E	0.0892989	0.388875	1.25942	0.0382457	0.345256	0.701683	0	1.08905	0	0	0	0.546015	0	0	0.946707	3.21089
Efnb2	E	0.152886	0.0455694	1.31089	1.70254	0.769836	1.16798	1.29987	1.01422	0.0758882	4.32249	0	1.24681	5.56949	0	2.11449	4.51102
Sparcl1	E	-0.386714	0.898592	-0.372616	5.20877	1.69481	5.14247	-0.0652551	3.53159	3.28979	7.61551	0.315567	1.21132	-1.23033	3.4013	1.13584	8.48193
Serpinb1a	E	0.0154818	0.0287744	0	0	0.336532	3.32568	2.10641	2.16158	1.18807	0	0	1.27139	0	0	0	3.41602
Slc4a8	E	0.0105999	0.123627	0	0.564413	0.421235	0	0.509931	0	0.0797012	0	0	0.608273	0	0	0.732427	2.94323
Rgcc	E	0.0273856	-2.96221	0.952772	-2.41858	-3.17632	-3.33295	-3.23238	-1.85274	-0.0971277	-5.09405	-6.39396	-1.84205	3.663	-0.807454	2.62811	4.09616
Spsb4	E	0.0519908	0.0156922	0.55679	0.288027	0.118824	0	0.436329	0	1.56144	0	0	0.0923945	0	0	1.03693	2.31795
Aqp1	E	-0.194195	0.385519	-0.557115	-0.268716	1.39264	0.0424676	4.449	1.55315	1.27376	9.72904	9.89176	5.39537	9.38147	6.44235	2.19767	6.06341
Msn	F	-2.99239	-3.51327	-0.265438	-0.620286	-2.22593	-0.973815	0.982862	0.459823	1.04074	1.76963	-2.85816	1.41037	2.99076	1.98663	1.66751	1.3031
Tmbim1	F	-2.41113	-3.69894	1.44595	-0.312734	-2.67492	-0.432951	0.385877	-0.027163	1.74964	2.24028	3.28114	1.78763	4.24681	2.11575	1.51678	2.20931
Gpr64	F	0.343509	0.307303	2.68671	2.88477	0.346598	1.70517	5.00654	0.41516	5.40799	3.66643	8.05495	3.04392	5.84422	2.23686	5.71536	4.56995
Rcan1	F	-0.667146	-1.16868	7.52551	2.67686	0.754085	6.24139	4.38706	3.68455	5.26516	2.06304	7.37938	3.35823	7.29597	2.52676	6.48966	6.01998
Plec	F	-2.68335	-3.48001	0.839825	-0.249944	-2.45356	-0.116424	1.85315	1.04369	2.02139	1.25286	3.52748	1.83391	2.95979	2.43137	1.63616	1.64139
Prnp	F	-3.0093	-3.61893	2.5102	2.22647	-1.55312	1.12556	2.76577	3.53701	4.27964	2.71511	4.32224	2.79131	-4.57016	1.61331	2.42652	2.75119
Thbs3	F	-1.17468	-1.71949	5.689	0.608433	-0.052233	0.985709	4.55016	4.26246	5.90516	5.86313	2.76	3.67026	8.24057	4.75668	4.26206	3.65659
Fbln7	F	-0.442689	-0.436736	6.70888	2.08424	0.923236	4.70316	2.70989	2.3792	7.8539	-0.72796	7.69298	6.17795	9.21925	5.10627	3.67116	8.04647
Lgals3	F	-1.22722	-1.42001	5.98097	4.53316	0.897676	1.38321	5.47459	3.78617	6.75352	5.94068	8.08638	5.63	-1.93548	7.30918	6.80358	7.40408
Anxa8	F	-0.813985	-0.788242	6.24375	1.39551	0.266564	1.63963	6.7125	2.51134	3.8575	0.0293091	9.08934	4.98282	0.840618	7.45365	8.44146	5.86015
Fn1	F	-4.54614	-4.26265	4.15533	4.38515	-1.66743	1.30657	5.68431	-0.144884	5.43028	3.27313	3.14481	3.67925	2.8917	4.48778	4.8219	7.20402
Cd109	F	-1.22493	-1.29553	5.18547	2.89559	0.481046	2.17256	5.54891	3.03255	5.77961	-1.51045	7.08533	5.89758	5.78478	6.89044	6.46855	6.42614
Ugdh	F	-2.8561	-2.36053	1.48041	0.532405	-2.38231	2.67898	4.5764	-1.12908	4.7298	2.81292	2.52205	1.55179	4.80414	0.0857476	1.43838	4.34085
Mustn1	F	0.103868	0.0752725	1.22119	1.12899	1.02325	1.8658	5.58168	4.16398	5.47616	0	8.429	2.68318	0	3.04742	5.54973	3.91712
Camk1d	F	-0.381507	-0.505138	1.01307	0.659229	1.10246	-0.00352298	4.12031	2.6579	4.60793	4.22427	6.98174	4.06514	7.67816	5.48436	6.14178	2.81786
Ccdc109b	F	0.111742	0.016584	1.27265	0.142163	0.0776856	1.55308	4.83861	0.445505	4.43009	0	0	3.2636	0	0	3.26076	5.08564
Cav2	F	0.0859614	0.159783	3.1423	1.44629	0.672954	4.2444	3.87233	2.9207	3.04211	0	3.64606	3.02511	0	4.79081	2.84371	3.73619
4632428N05Rik	F	0.459882	0.801276	1.26536	3.34733	1.79156	1.70229	5.01295	2.50688	6.24072	3.48992	1.54589	3.84377	3.4544	1.45818	4.35382	5.80211
Uap1	F	-2.00961	-3.51052	0.701455	-0.0817698	-2.94697	2.19681	2.58905	0.74575	3.80516	2.64656	2.14837	0.420596	1.17416	-0.0310684	1.43337	2.55592
Hr	F	0.0670622	0.0528514	1.32648	3.54199	0.566352	2.2006	2.46831	1.64056	0.917142	3.48992	0	1.75681	0	2.58508	3.20937	3.89518
Ltbp3	F	-0.88358	-1.74098	-1.12589	-0.306136	-2.78093	1.98939	-1.75209	-0.73448	0.639577	2.39844	3.32395	0.972872	2.89209	-0.485502	1.5323	2.73865
Plp2	F	-1.75148	-1.99435	-0.353598	0.386255	-0.728787	1.48467	2.52629	-0.0855342	0.74923	2.20846	0.76733	2.43552	2.77107	1.76175	2.10398	2.55118
Gm6169	F	-0.0100328	-0.063432	1.02767	1.18335	0.897589	1.50336	3.31316	1.59268	1.9117	3.8505	-0.362507	2.99381	3.29536	2.63579	2.94838	3.22961
Tspo	F	-1.9162	-2.24172	-1.42048	-0.733177	-0.771604	1.58896	4.33456	0.830356	3.04727	2.62963	-3.86527	2.46577	2.87968	3.31023	1.8042	2.79028
Cyb5r3	F	-3.80686	-3.76568	-1.58322	-0.364159	-1.85786	0.467324	2.13371	-0.113198	3.22449	2.40825	5.12935	1.33245	2.16229	2.30902	1.48334	2.04748
S100a6	F	-3.49324	-3.46495	-1.44888	-1.64054	-0.349726	2.33876	3.13627	2.86885	3.04777	1.93968	3.32693	2.72415	3.10528	1.40823	1.9345	2.68168
Cdh13	F	-0.284845	-0.341998	-0.448551	-0.497579	0.649113	3.08709	6.45245	1.8287	5.6716	0.560373	9.59918	4.8074	6.906	5.54689	5.59156	7.99529
Crip1	F	-2.09046	-3.66054	-0.956016	-2.02765	-1.27352	2.28939	4.07113	2.13944	3.71516	-1.37156	1.08636	2.93653	1.88674	2.69052	2.4909	3.26978
Dnm1	F	-0.809795	-0.756469	2.49334	4.53718	0.728756	4.22747	6.79322	3.81406	5.79485	5.51876	4.68601	3.42127	2.00519	5.58496	5.61691	5.03418
Cav1	F	-1.05009	-0.703985	0.770557	0.344292	0.35334	5.6257	5.29481	4.64263	6.18844	0.409046	0.711539	6.20619	8.95856	5.82613	6.12184	6.54341
Ahnak2	F	0.154937	0.170563	1.45913	1.96749	1.48969	6.05645	7.50967	6.57688	7.22944	3.48992	7.4727	5.99629	0	2.41172	6.19921	5.91605
Nbl1	F	-1.74713	-1.05382	-1.81866	4.03454	1.28087	6.27121	6.85156	6.77578	8.71377	8.57058	7.88845	7.02536	8.52672	8.03147	5.06254	5.67293
5730416F02Rik	F	0.0459253	0.128307	0.823636	1.06221	0.825249	1.92233	3.09245	2.07993	3.181	3.96545	5.36866	2.99679	3.4544	3.14932	2.80767	3.297
Capg	F	-1.67649	-1.45616	2.01846	2.09939	0.453262	4.65463	6.39645	5.04667	6.48099	7.28793	8.21345	6.28595	6.3872	6.44537	5.45618	6.18515
S100a10	F	-2.59112	-4.15058	1.07003	-1.62162	-1.70907	2.86035	3.48576	2.03706	2.53141	-0.409858	0.959979	2.50909	2.64737	2.14175	1.50039	1.57462
S100a4	F	0.0678753	0.280099	0.522542	1.95779	2.00382	1.18287	6.54921	5.90891	3.45209	0	5.22794	7.2937	7.96603	7.29471	4.3446	3.37007
Ybx3	F	-2.31108	-3.11576	-1.0612	-1.52828	-1.45684	0.45604	2.52779	2.21775	1.88226	-3.10826	2.7493	1.37112	3.26252	-0.158322	1.12538	1.78704
Cd44	F	-0.765312	-1.68489	1.21784	-1.29664	0.436882	2.76569	5.01453	0.807836	6.29386	3.85439	-2.64051	3.33266	7.13696	4.89133	3.57289	5.45774
Fyn	F	0.551288	0.439135	1.73756	1.23006	1.50988	5.49465	7.34339	3.48177	5.98555	0	0	3.59624	0	4.16262	2.99349	4.82275
Aebp1	F	-0.958199	-1.35369	2.04111	0.245207	-0.593691	6.56899	4.53397	0.745283	5.20984	6.296	6.78435	4.19075	5.2155	4.33437	-0.712935	5.01943
Timp2	F	-0.956712	-3.02803	-1.73385	-0.313992	-2.20553	2.62502	2.80436	2.10941	2.54558	2.06611	2.09262	2.09674	2.67242	2.62564	0.660405	0.970414
Fam129a	F	-0.855447	-0.949609	-1.49671	-0.922289	0.687561	3.00379	3.53774	3.4272	3.09808	2.02636	1.7942	2.2975	6.34255	5.14312	2.69745	4.40618
Glud1	F	-1.48411	-3.08027	-0.75468	-2.9264	-1.95133	1.84019	1.8858	1.62647	2.0953	0.173193	0.948714	1.2593	4.73773	2.16704	1.50637	1.49862
Klf4	F	-3.81828	-3.23618	0.472967	1.20015	-0.318501	4.41839	3.56061	4.48098	4.12009	1.26007	2.9085	2.98859	5.09708	1.77095	3.60078	2.5975
Gem	F	-0.670784	-0.700832	0.564217	2.47304	1.70388	7.61003	5.31933	7.35722	7.44511	7.57355	0.334472	4.32111	10.9445	6.9249	4.26959	5.39975
Atf3	F	-1.43796	-0.882114	3.52505	0.872016	1.83926	6.90342	5.16639	7.1477	7.16401	8.67404	8.66404	3.86168	5.59659	5.57416	5.51727	3.21149
Lmna	F	-3.25503	-2.69139	0.353813	-0.355456	-1.56717	1.28635	0.944941	1.5957	2.43248	1.54451	2.8629	1.73113	3.23358	2.2526	1.27466	0.717421
Anxa2	F	-1.46982	-3.85187	0.306537	-1.7687	-3.08556	0.42787	2.35643	0.96915	2.03984	0.533127	-0.520039	1.97043	-1.72054	1.54853	0.543764	0.884269
Ndrg1	F	-1.5506	-2.12424	0.0600161	1.38704	-1.12903	1.3407	2.56652	2.0193	4.80211	0.902692	5.48257	2.17855	6.58573	1.73934	3.17663	2.91887
Htra1	F	-1.09461	-3.74644	-0.823595	-1.87535	-3.44517	1.67747	0.61467	-1.62322	1.90031	3.59944	2.10378	0.835466	3.04442	2.62975	1.06554	3.4687
Osr2	F	0.142785	0.0686429	1.16591	0.646735	1.19659	2.62521	3.38147	4.49753	2.95101	0	1.54589	1.93522	0	0.914778	4.64195	4.09817
Htra3	F	-2.15882	-3.75057	0.0310205	-0.916085	-2.55512	3.23105	1.47654	2.30411	-0.54715	1.12306	-5.87926	0.87018	2.63092	1.39835	2.30591	2.36215
Tspan5	F	0.56455	0.292203	0.982845	1.1241	0.718608	3.03952	3.11697	1.32162	4.10944	3.48992	0	2.87103	8.3134	2.79269	2.70465	3.79068
Vim	F	-1.39482	-3.99079	-1.55533	-2.77843	-2.30004	1.51272	2.23216	1.82709	2.09738	1.40941	1.52053	1.92655	2.11288	1.87861	-0.227138	1.46352
Ptrf	F	-1.40332	-3.32787	-1.15532	-1.19163	-2.87737	-0.0731977	2.9247	1.76894	2.2203	-1.51272	2.1088	1.83814	-1.33948	1.45028	0.0241086	1.31065
Anxa1	F	-0.602563	-3.90368	-3.18267	-2.81686	-3.1424	1.29137	2.28324	1.03583	1.69013	1.09759	1.62727	1.69105	0.624757	0.31752	0.200904	1.15531
Ecm1	F	-0.64429	-2.03379	-7.40869	-7.634	-4.58351	2.42412	2.73368	0.982023	2.36288	-1.60023	-6.74572	0.961325	-6.18039	2.60464	0.162342	1.33061
Tmem43	F	-1.15673	-2.5679	-0.370954	-1.92822	-2.29832	1.85672	3.14737	-0.535154	2.46032	4.28638	-2.54399	2.55739	2.68865	-0.4663	2.66646	2.51631
Cxcl1	F	0.694946	0.715813	0.100461	0.66166	2.37861	9.73362	6.16327	3.34803	9.25721	-0.184937	1.36096	3.75069	2.74885	5.79294	1.98626	3.85057
Nova1	F	0.0825928	0	0.673152	0.124021	0.530998	4.22173	4.79464	0.19861	2.59604	0	0	1.31168	0	1.55318	1.78276	2.07532
Dock11	F	0.0444372	0.44034	0.529409	1.97088	1.12344	1.60654	5.63823	2.89749	4.58961	1.29991	0	4.68653	3.65787	4.81128	2.39513	2.19773
Tubb6	F	-1.06085	-1.58368	3.86364	0.615707	-0.0945288	5.84962	3.01358	3.92957	4.20885	4.968	-2.65351	2.23859	7.44556	1.9946	3.39523	4.75625
Ndrg4	F	0.328085	0.162812	1.50777	0.714722	0.39773	0.706419	6.12017	3.47022	4.09627	0	0	2.79042	1.41158	2.11928	2.63985	4.58782
Pqlc3	F	1.07322	0.258028	1.81874	1.34	1.60942	2.58831	4.84156	5.54559	4.99421	0	0	4.37655	5.88533	2.38623	4.12737	6.24934
Anxa3	F	1.43984	0.875037	1.02093	1.12895	0.517683	3.30775	8.38868	2.89157	4.33855	1.29991	0	3.5764	1.41158	1.4313	2.77332	5.96998
Serpinb6a	F	-1.91928	-3.57205	-1.17017	-1.95486	-3.03863	2.97603	3.1003	-0.286282	1.48613	2.72546	-5.70944	1.99252	1.61598	0.0400178	1.94309	2.57854
Fez1	F	0.06885	0.0764892	0	1.33452	0.563828	3.14406	6.63921	2.13983	3.19802	0	0	2.53867	8.68331	2.8961	1.89033	2.29761
Sulf2	F	0.305891	0.511686	0.981288	2.73197	1.66281	4.67517	7.45549	2.24528	4.80808	7.42685	0	4.71837	7.02793	0.88828	4.35693	4.33214
Arl4a	F	-0.372265	-0.324955	1.63047	3.00495	1.22161	3.98353	3.33402	4.76768	5.06119	-1.04125	-1.04125	3.35185	6.86613	0.654982	4.08403	3.91181
Crip2	F	-2.06928	-2.63962	-2.1647	-1.44052	-2.49355	-0.56245	2.95006	3.07891	2.55967	-4.32993	2.33929	1.83415	2.19543	1.88132	2.69467	2.55382
Fhl1	F	-0.999032	-2.27944	-3.44694	-2.39585	-1.63831	2.84542	4.35975	2.7387	4.68362	3.03816	1.07108	2.41895	4.1567	0.609295	2.45131	1.15407
Pamr1	F	0.316019	0.246387	1.60296	0.184886	0.718668	2.6064	8.06928	3.68619	5.78205	1.29991	0	4.49333	10.5653	3.78257	3.07153	4.48364
Axl	F	-1.39395	-2.70958	-5.46756	-3.12982	-2.93022	1.22356	3.72295	0.998586	2.56628	0.295967	2.49236	1.40778	2.88721	2.02708	0.98625	2.61621
Col3a1	F	-2.80286	-3.01661	-5.61865	-3.78515	-1.56376	4.87089	4.97736	4.58527	2.98917	5.8585	3.71233	4.55444	4.45921	5.41282	0.0917786	1.60486
Dcn	F	-2.10926	-2.76465	-3.7911	0.818449	-2.26976	4.7877	3.3995	3.8851	4.16668	2.25762	6.0522	4.01317	5.21991	2.77083	2.81565	1.505
Fam124a	F	0.11603	0.0667393	0	0.154861	0.89888	4.7839	3.53958	1.97835	4.29352	1.29991	0	4.07964	9.31865	0	1.68311	4.43809
Steap3	F	0.532409	0.673959	0.877744	1.57747	1.94507	7.00621	7.0036	4.28045	6.86659	10.0272	0	5.9489	9.73874	4.95227	3.41993	5.56381
Sema3c	F	0.139654	0.295072	1.9146	2.13001	1.03142	4.66835	9.15739	3.07996	2.95353	0	9.83436	5.14717	7.58445	1.78365	4.07689	7.62455
Gfpt2	F	-3.30183	-2.845	3.47704	2.50462	-1.30541	4.23931	5.42272	3.11245	5.53888	1.91229	-4.51068	2.40721	4.35827	-3.81629	2.72387	5.13681
Sod3	F	-2.05187	-3.48098	-4.59446	-2.14126	-2.94393	4.21842	4.0267	0.557725	3.98801	4.06172	-2.87329	2.85982	5.68862	-0.378734	5.02116	3.37561
Gsn	F	-4.52264	-2.7381	-0.832753	2.62354	-0.0458111	6.95348	5.44279	6.48646	5.74313	5.46902	3.5256	4.83229	5.70356	3.34387	2.42904	1.47761
Ablim1	F	1.22814	0.596679	0.284911	0.0421077	1.07661	8.3053	8.72693	5.94088	8.28299	0	0	6.11392	8.96793	5.37683	5.20757	5.12133
Cdon	F	-1.13221	-1.53021	0.337044	2.15643	-0.204638	5.40503	5.502	5.07908	5.74069	-0.734431	5.57229	5.48077	8.05816	3.39119	6.20973	6.09493
Ssc5d	F	0.151132	0.207812	0.161834	0.0816444	1.00416	6.12857	6.4681	2.62802	5.70919	0	2.75693	5.96689	0	2.04816	3.15755	6.18046
Medag	F	0.0759912	0.221773	0.172586	0	0.92831	6.60896	6.38216	3.76083	6.34729	0	2.27492	4.92482	5.16454	0.25726	2.78817	5.61814
Tppp3	F	-0.00619205	0.0765745	-0.320039	-0.106613	1.28436	7.10312	9.49573	4.87481	9.43357	-0.782762	1.49216	6.13073	-0.782762	1.95379	5.07762	6.16173
Cxcr7	F	-0.560243	-0.493826	1.76806	-0.534814	0.330566	7.23475	8.74766	2.75901	7.96939	0.323501	0.569485	5.4091	9.34299	4.23772	5.20155	7.97141
Ntn1	F	-0.497708	-0.46552	-0.697323	0.860282	0.596559	6.40588	7.43802	4.39771	7.63581	-0.790343	-0.790343	5.46579	7.85159	3.69612	6.85691	6.00226
Tnxb	F	-0.336415	-0.329931	-0.146468	-0.199308	1.16544	8.67719	10.2838	7.86631	9.95234	0.623796	0.86978	7.49887	10.2235	3.38494	6.18835	6.95487
Cilp	F	-0.3158	-0.145899	1.60441	0.640521	0.671191	5.27574	2.21516	9.37825	10.5337	-1.32567	9.73624	7.00359	8.602	0.54458	8.39108	-0.0989673
Creb5	F	0.0691041	0.107403	1.08131	0.999221	0.825645	4.00097	5.65753	1.68154	4.5601	4.69244	0	2.80149	4.13773	1.57698	5.70977	6.78074
Sema3e	F	0.155261	0.197166	0.816399	0.860962	0.567727	0	5.23537	0	1.85222	0	0	2.55271	8.17936	1.15613	6.05661	5.43232
Ntn4	F	0.418715	0.203698	0.777507	2.25163	1.05258	5.01558	5.31736	3.80127	4.80653	0	0	1.63472	2.11122	2.21751	5.98829	5.63201
Arhgap44	F	0.0260572	0.0935984	0.976035	1.3182	0.560571	1.64485	3.34856	0	3.85618	1.29991	0	1.17491	0	1.30969	2.79215	3.44445
Radil	F	0.132677	0.0647861	0.126856	0.511627	0.538133	0.981979	3.77522	0	3.97276	2.42932	0	3.64171	0	0.25726	2.49314	1.08072
Mgll	F	0.336041	0.590704	0.967538	1.34274	1.27083	2.08434	5.90431	1.84812	6.35012	0	0	3.25346	0	3.63982	5.34958	3.08304
Fam126a	F	0.837341	0.793046	1.38116	0.15583	1.11695	3.655	5.22812	2.6842	5.69379	0	1.54589	3.83482	0	0	4.49391	3.63094
Sirpa	F	0.808219	0.594098	0.332819	0.629034	1.80642	4.67197	5.74005	2.17287	3.5155	0	8.80221	2.12748	0	3.36446	2.71471	5.69673
Gas1	F	-1.03483	-2.06107	-5.45465	-3.63182	-3.67845	2.58573	-0.690555	3.81767	1.29341	2.99176	2.56003	1.73032	2.59905	1.03187	3.26493	1.62349
Dpt	F	0.18729	0.166053	0	0.609104	1.74613	8.99107	7.93139	3.77558	7.4647	8.39785	8.27657	6.08217	0	5.97539	2.57154	6.41012
Hspb8	F	0.275349	0.297593	0.816349	0.351766	0.945599	10.0941	6.92812	3.46739	7.71257	6.82762	0	4.19879	0	0	4.69752	6.39866
Lrrn4cl	F	0.718353	0.717581	0.128402	1.23883	1.10575	8.88831	8.91405	7.59159	8.27866	4.32249	0	4.77474	2.58035	3.3947	3.03486	6.80363
Ly6a	F	-0.522828	-0.489046	0.0345348	0.21347	0.309842	8.75118	9.40301	7.49185	8.80979	0.0259161	0.2719	5.67555	-1.27399	3.74301	0.908474	6.69328
Ly6c1	F	0.429476	0.505943	1.0216	0.756726	1.61422	8.76155	9.60842	5.77739	8.54731	1.97243	0	5.59543	0	4.69761	2.73605	7.37873
Has1	F	-0.688894	-0.539155	0.594847	0.513783	0.217171	7.78831	6.531	5.06908	7.68496	-0.308737	-0.0627526	4.67821	3.48751	-1.02706	3.3392	8.64955
Pdpn	F	0.0715078	0.0712444	1.21201	1.52732	1.05963	4.7508	6.1123	3.94001	5.92241	2.7758	0	4.42725	3.65787	1.54676	0.383505	4.90183
Cd248	F	1.32986	0.808894	0	0.207504	0.76644	8.6812	9.5515	4.30926	7.16689	5.23087	2.27492	3.24319	0	0	0.143793	5.9356
Nov	F	0.0938929	0.053976	0.161019	0.217569	1.02316	3.72748	9.08511	4.49985	7.19494	2.42932	7.59235	3.08614	10.2986	0.211056	1.10941	4.28932
Vat1	F	-0.881324	-1.26028	-0.587464	-1.17695	-0.519227	3.21908	3.44542	2.20847	3.36471	-1.12114	4.0284	1.76987	-2.42105	1.5584	0.302548	2.42315
Cd55	F	0.369258	0.756999	0.471518	0.11695	0.598022	2.37533	6.74273	1.18098	5.22991	0	0	3.3119	1.41158	0	1.21793	6.9091
Emilin2	F	0.558877	0.375168	0.165383	0.0464716	0.960477	3.94947	7.09511	0.668978	5.23862	0	0	2.5635	0	0.211056	0.63886	6.03661
Gda	F	0.841387	0.437978	0	0	1.55717	4.92947	6.53771	1.47471	5.45365	1.29991	0	4.07712	0	1.80844	1.07887	5.69383
Pcolce2	F	0.289091	0.177356	8.90113	0.793487	0.833374	7.71848	9.49168	1.65558	5.96507	0	0	4.46593	7.81467	0	3.24802	4.50301
Tmem100	F	1.0089	0.572757	1.22715	0	0.67366	3.02453	7.92595	1.57201	7.05197	8.79925	0	1.88679	0	0.405889	1.72159	4.77903
Gprc5b	F	0.474681	0.515964	1.01652	0.474577	1.26878	6.43205	5.21137	2.80702	4.46398	0	0	2.58351	0	0.678813	0.496356	4.06565
Map6	F	0.313544	0.420516	0.0477764	0.566963	0.530358	3.68276	3.53462	4.55973	3.7898	0	8.8807	4.42775	0	0.211056	1.13324	4.43058
Mt2	F	-2.08053	-1.44129	0.333032	-1.92503	-1.03158	4.37812	2.80095	2.48142	3.59133	3.99349	4.22694	3.06889	-2.7331	2.34943	-0.108468	2.25364
5430435G22Rik	F	0.0754784	0.331031	1.10359	0.121116	0.691152	1.34289	5.8702	3.52478	3.6782	0	2.27492	3.95126	0	0.468316	0.582552	2.68245
Ppp1r14b	F	0.986963	0.635036	1.79271	0.275575	1.58918	1.4186	5.1302	1.70114	3.36483	0	0	2.87256	3.99481	2.94002	2.64726	4.14778
Gm7332	F	0.78997	0.464359	1.28149	0.14009	1.32865	0.530341	4.22068	1.73585	2.68094	0	0	2.48511	2.11122	2.19132	1.98942	3.41414
Dpp4	F	0.0466385	0.0928304	0.0436674	0	0.351728	0	7.6921	0	7.08137	0	0	1.43224	4.26777	0.211056	0.198147	0
Cadm3	F	0.0925038	0.187287	0	0	0.510469	6.5216	7.46405	4.58305	6.38336	0	1.54589	2.4829	0	1.27611	0.234731	0.703683
Cd34	F	0.429292	0.371005	0.211946	0.0666355	2.1433	10.3584	10.2629	6.98508	9.28248	1.97243	0	5.98147	8.52326	2.38804	1.41379	0.582044
Clec3b	F	0.0476903	0.0732566	0	0	0.788044	8.24173	8.34405	4.67697	6.8722	0	2.27492	3.67506	6.17776	0	0.415112	0.494127
Mfap5	F	0.777043	0.268946	0	0.0816444	1.63491	9.32777	9.66186	8.09491	8.01461	1.29991	10.6917	6.3812	2.11122	0.616944	0.259005	0.427232
Col14a1	F	0.188998	0.296336	0	0.466082	1.18478	7.76232	9.21056	5.04749	8.56458	0	1.54589	6.00055	9.41653	3.67523	0.884161	0.943806
Hmcn2	F	0.284959	0.518978	0.663841	0.0515029	1.08366	6.28614	6.33019	6.69914	10.2073	0	0	4.58729	0	0.698834	0.381816	0.636519
Gpr133	F	0.302755	0.752094	1.05059	0.0732165	1.43883	8.36279	8.2888	2.32219	7.29603	1.29991	0	3.73426	0	1.19533	0.436953	2.72005
Tmod2	F	0.99583	0.715634	0.272344	0	0.545613	5.39084	7.61449	4.45176	7.55282	0	0	3.49077	8.01315	1.58286	1.12368	1.30461
Igfbp6	F	-0.591664	-0.536893	-0.896175	-0.0895046	2.33655	8.82465	10.4283	8.94802	11.24	8.37856	10.313	9.48154	10.1775	6.46943	3.57491	3.35378
Fbln2	F	0.4988	0.30743	0	0.225257	2.17243	8.97831	8.93512	8.99607	10.4116	3.66643	7.57792	8.536	8.99635	3.89894	1.85199	1.84666
Ltbp4	F	-0.33085	-0.360781	-1.3906	1.12387	1.54282	8.95353	8.28743	7.55232	8.96029	5.99356	6.43276	6.3302	7.20864	5.44453	1.16561	3.45168
Itgbl1	F	0.066786	0.446164	0.041583	0.354537	1.52058	7.19301	4.92297	6.61515	7.65614	7.17282	11.9768	6.01238	6.65273	5.81575	1.04965	0.22469
Myoc	F	0.414848	0.46747	0.0426936	3.57276	1.97772	4.56536	8.9979	11.7443	10.9298	1.29991	10.8472	6.29046	0	0.343321	2.19838	0.463961
Tgfbi	F	-0.41468	-0.154638	3.82332	-0.650505	1.26822	7.85645	7.44331	5.72623	7.00155	-1.37868	8.84197	6.93949	9.86411	4.3544	3.02541	2.93685
Anpep	F	0.3837	0.417832	0.0490341	0.52731	0.372898	6.37475	5.50711	5.6478	6.17032	7.96326	5.43418	4.30715	5.35215	2.99712	0.600096	1.78003
Galnt15	F	0.234809	0.0658236	0.135811	1.67638	0.747411	5.90367	4.18025	3.41066	7.57386	6.90006	0	3.86584	7.52067	1.47803	3.65734	1.38037
Plat	F	0.203364	0.480531	0.0715505	0.399979	1.86641	7.04653	5.79965	2.80681	8.81433	0	2.27492	5.38678	8.96314	8.21212	4.71889	1.03312
Ppl	F	0.111808	0.146405	0	0.0515029	0.395519	4.7042	3.90644	4.59862	4.92652	6.18278	7.54863	4.09365	1.41158	2.69735	3.0123	0.391091
Rnase4	F	-0.180336	-3.57562	-6.19965	-2.42968	-3.47363	3.61862	2.86812	2.86043	2.83553	0.41674	2.33725	1.79799	-4.0516	0.392166	-1.86007	-0.277718
Gpnmb	F	0.126357	0.158125	0	0.916954	1.42024	7.10651	3.50543	5.77653	6.99817	9.41128	10.3829	5.80081	0	3.23072	0.0643253	3.16281

## Sheet: Mesenchymal ICGS groups
Gene Symbol	Row ID	MSC-L like	OPr like	MSC-S like
Il1rn	A	3.80769	0.699618	0.0214549
Thsd7a	A	5.23282	0.172488	0.428869
Svep1	A	3.56451	-3.16744	-1.66237
Cxcl12	A	6.58132	-3.80937	-2.69574
Cyp1b1	A	3.73054	-4.20221	-2.61161
Apoe	A	3.9551	-2.70336	-4.89729
Gas6	A	2.8692	-4.59438	-2.73736
Ccbe1	A	5.34474	0.403051	0.776267
Fmo2	A	7.21268	0.420138	1.07856
Fbln5	A	2.71703	-4.89352	-2.14707
Nrp1	A	2.69897	-3.3676	-2.34025
Ms4a4d	A	5.57629	0.571233	0.6474
H2-K1	A	2.51926	-2.88358	-1.55433
Igfbp4	A	2.64311	-5.14054	-1.70762
Marcks	A	2.18055	-2.84428	-2.39475
Cdc42ep1	A	3.68987	-1.16149	-1.05175
Fzd5	A	2.52995	-2.42137	-1.24752
C2	A	4.27241	0.285232	0.790903
B2m	A	1.21612	-2.2904	-0.698575
1500009L16Rik	A	4.83259	0.20601	0.839414
Gm17366	A	1.73075	0.0350457	0.214765
Rbpms	A	3.91752	-0.503099	-0.0998086
Slc40a1	A	5.34365	1.00604	0.3421
Fgd6	A	4.75144	0.855038	0.544413
Kalrn	A	3.51251	-1.0229	-0.242086
Runx2	A	2.39317	-1.74804	-3.40206
Hvcn1	A	4.30198	0.477447	0.235029
Cd1d1	A	4.77366	0.460573	0.407577
Vezt	A	3.79483	-1.4983	-1.06635
Fhl2	A	5.65276	0.108295	0.457391
Mylk	A	4.01811	-0.7505	-1.24454
Fgf7	A	6.00354	0.684043	1.20199
Spp1	A	6.05432	0.245352	-1.63261
Sept4	A	5.36853	1.18081	0.488936
Myo1b	A	4.45976	-0.550134	-0.34251
St5	A	4.37201	-0.43727	-0.437774
Sema6d	A	5.53574	0.889469	0.748173
Rftn1	A	5.14851	0.13792	0.668816
Angpt1	A	5.05382	0.293913	0.638387
BC039771	A	4.48345	0.405483	0.314511
Rai14	A	3.84898	-0.86601	-0.887445
Kcnip3	A	4.62859	0.37149	0.305292
H2-Q6	A	4.4872	-0.00222363	-0.541674
Eepd1	A	4.70419	0.361741	0.191195
Arrdc4	A	5.38424	-1.0878	-0.463305
Cxcl14	A	3.53812	-3.43146	-3.12007
Dlg5	A	3.30729	-2.6397	-1.84613
Plxna2	A	4.67576	-1.10343	-1.40475
Tnc	A	3.79401	-4.2783	-3.08064
Podnl1	A	5.71378	0.700397	0.239059
Igsf3	A	3.34264	-2.2357	-2.96616
H2-Q10	A	5.55922	0.851144	0.0957096
Ptprd	A	3.79742	-2.40102	-3.3652
Plxnd1	A	4.7109	-0.596548	-0.976352
Fgfr2	A	3.73137	-2.39729	-2.87931
Ibsp	A	7.63099	1.02248	-0.965902
Lepr	A	3.8853	-4.42483	-3.64828
Csmd1	A	6.98335	-0.0592491	0.236704
Ggt5	A	6.56706	0.821502	0.515268
Cdh11	A	4.33595	-2.78761	-3.3936
Tnfrsf19	A	6.98306	0.872637	0.236053
Wdr86	A	5.87301	0.229602	0.0978985
Gpr116	A	6.65327	0.0883723	-0.215634
Ebf3	A	5.35646	-2.70021	-1.53535
Cdh2	A	6.71291	0.785138	0.135208
Kitl	A	7.7962	-0.476883	-0.301672
Pappa	A	8.11621	0.201825	-0.42532
Gdpd2	A	8.12312	0.00610888	-0.480962
Zfp618	A	4.35332	0.595424	0.712605
Angptl4	A	5.02263	0.222513	0.354193
Lmo7	A	4.73076	0.842298	-0.605051
Rasgrp2	A	4.51423	0.980292	0.433401
Lphn2	A	5.216	1.00633	1.05649
S1pr1	A	4.19061	0.616907	0.400872
Pawr	A	3.45078	0.44461	0.0397534
Psmb8	A	4.79053	0.92825	1.02787
Tle2	A	3.18057	-1.00401	-1.08902
Rasa3	A	2.11555	-2.06178	-1.86659
Mmp23	A	5.07821	0.68007	1.33154
Clec2d	A	3.575	0.373772	0.384901
C4b	A	3.48805	-2.10944	-2.2251
Gprin3	A	3.34602	0.268507	0.0412201
Cebpa	A	3.45663	-0.507684	0.16568
St3gal6	A	4.06912	-0.149322	-0.726297
Serpina3c	A	4.90773	0.375631	0.808917
Samhd1	A	3.00392	-1.69478	-1.96886
Gpr176	A	3.88441	0.0930877	0.299891
F830016B08Rik	A	3.72989	0.015138	0.0571292
Adcy2	A	3.50528	-1.48947	-1.72919
Lfng	A	4.47274	0.648449	0.470746
Epas1	A	2.57869	-3.40721	-2.69688
Marc1	A	4.1511	0.112284	0.0703327
Tns3	A	2.87056	-2.86893	-2.8072
Phactr1	A	5.29054	0.64945	0.924295
Steap4	A	5.64795	0.546596	0.404706
Il7	A	4.54376	0.299541	0.570887
Bmp6	A	4.75555	-1.25905	0.288936
Shroom3	A	4.58446	-0.0102789	0.00181887
Gpr88	A	4.79383	0.188388	0.203746
Fst	A	6.04866	0.812355	1.04194
Chrdl1	A	3.4508	-3.47577	-3.15652
Vegfc	A	5.84319	0.273965	1.26067
Hmgcll1	A	4.75362	0.293539	0.246787
Il34	A	5.37459	0.128059	0.399615
Itga1	A	4.84831	-0.0348602	-0.40551
Dpep1	A	6.68578	-0.479796	0.298186
Serpina3g	A	5.70119	0.357309	0.139696
Tmem176b	A	3.55785	-2.49714	-4.13634
Tmem176a	A	3.66758	-2.30367	-3.7475
Gm4951	A	5.63545	0.201116	0.0283664
Grem1	A	5.96985	0.367012	0.165127
Speg	A	5.59516	0.90054	0.240052
Mme	A	6.37697	0.212379	0.128799
Agt	A	6.61266	0.342427	0.25734
Notch3	A	6.81311	0.636824	0.367766
S1pr3	A	6.38529	0.455194	-0.329869
Lpl	A	6.87341	-0.0483776	-0.0944206
H2-Q7	A	5.75972	0.928305	0.367405
Ccrl1	A	6.80206	-0.15488	0.214102
Kng2	A	7.17825	0.128554	0.402024
Vcam1	A	8.00448	-0.614502	0.0349975
Slc26a7	A	7.00183	0.425572	0.121877
Hp	A	8.81414	0.395539	-0.868836
Adipoq	A	7.81957	-0.0828591	-0.471424
Kng1	A	6.7968	0.148367	0.0549564
Esm1	A	8.03236	-0.274522	-0.287783
Chl1	A	3.67656	0.244701	0.12946
Soat1	A	2.55094	-2.7132	-1.30648
Snai2	A	4.40329	0.0637781	0.217379
Ptx3	A	4.29154	0.51777	0.741204
Serpina3f	A	3.75152	0.204408	0.0655324
Gpm6b	A	4.50778	0.776793	0.605405
Trf	A	4.13295	0.79412	0.215416
Susd2	A	4.26024	0.320859	0.437144
Hnmt	A	2.85218	0.182173	0.060931
Pde2a	A	3.2129	0.519148	0.0783949
H2-Q5	A	2.1015	0.0653578	-0.239408
Igfbp3	A	4.00046	0.329229	0.481184
Mdk	A	5.58938	0.996751	0.482376
Mdk-ps1	A	2.47339	0.379825	0.207855
Slc16a4	B	0.966068	1.39042	0.374818
Kctd4	B	0.163255	0.835792	0.191259
Slc13a5	B	0	1.15848	0
Slc6a1	B	0.0916208	0.790007	0.0137295
Panx3	B	0.0821465	1.35114	0
Matn3	B	0.238296	2.32091	0.0313293
Wisp3	B	0.0330722	0.892727	0.0256429
Fxyd2	B	0.0439613	1.66347	0.0640319
Syt8	B	0.0397662	1.23088	0.119957
Serpina1d	B	0.21302	1.46931	0.0270133
Serpina1a	B	0	1.02651	0
Efcab1	B	0.143384	1.06959	0.0097855
Gramd2	B	0.0621472	1.54574	0.442947
Prss50	B	0.0150488	0.899097	0.0943512
Rspo4	B	0.46541	1.126	0.288055
Epyc	B	0.048394	1.68388	0.651546
Stc2	B	0.0640473	0.894549	0.060704
Gm13500	B	0.033803	0.633947	0.148999
Batf3	B	0.035828	0.761105	0.098167
Smim5	B	0.162891	1.09032	0.0587245
Ppa1	B	0.601598	3.11854	2.96577
Kif26b	B	0.305013	1.10022	0.0139415
Rap1gap	B	0.228465	0.957471	0.0231944
Tnni2	B	0.0158549	0.539626	0.134218
Gm12349	B	0.0110088	0.789238	0.112227
Slc6a12	B	0.0107054	0.782224	0.267152
Cpa6	B	0.654522	1.01549	0.00553025
Wscd2	B	0.1064	1.09503	0.415577
Fam89a	B	0.289303	1.04985	0.182398
Nrtn	B	0.0379391	0.843293	0.187131
Tmie	B	0.160905	0.878711	0.167055
Rhbdl2	B	0.0260999	0.772337	0.015236
ENSMUSG00000103061	B	0	0.835571	0.180098
Smpd3	B	0.227403	2.00536	0.838418
F5	B	0.560249	1.72469	0.443886
Scrg1	B	0.0572626	2.13597	0.308113
Foxa3	B	0.0555205	1.03672	0.13329
Car12	B	0.0971082	1.2718	0.112073
Prkg2	B	0.105942	1.51849	0.121132
M1ap	B	0.19537	0.723127	0.271192
Calml3	B	0.0962599	0.572092	0.0284158
Steap1	B	0.125455	0.898474	0.44077
ENSMUSG00000106121	B	0.286064	0.910347	0.295846
Hs3st3b1	B	0.12232	1.02856	0.33058
Ephb2	B	0.163319	1.11916	0.448153
Unc5c	B	0.698438	1.7874	0.498855
1700088E04Rik	B	0.165731	0.680624	0.336551
Batf	B	0.265239	0.809216	0.10361
Cbr2	B	0.0167272	0.534863	0.14266
Sfn	B	0.0520636	0.812944	0.23701
Tube1	B	0.143566	0.603198	0.131017
Myh14	B	0.0590501	0.736834	0.0268807
Chadl	C	0.554393	2.65623	0.25779
Slc38a3	C	0.0896653	2.00156	0
Ncmap	C	0.0525714	2.11132	0.0601698
Extl1	C	0.00652339	1.03373	0
Gjc3	C	0.00548069	0.958052	0.0312241
Cmtm5	C	0.0134578	0.824589	0.00557568
Fxyd3	C	0	1.10595	0.0591419
Vill	C	0.512048	1.42686	0.254886
Chi3l1	C	0.238572	2.05754	0.227461
Gpr3	C	0.0412859	0.600221	0.0900538
Nebl	C	0.252235	0.811054	0.161201
Pitpnc1	C	1.93371	2.56925	0.573843
Mdfi	C	0.913028	0.984145	0.20111
Col27a1	C	2.03415	2.0299	0.0657293
Notum	C	0.0404452	0.912345	0.119802
Mcoln2	C	0.112749	0.83282	0.0716659
Sox8	C	0.0151416	1.11193	0.234433
Nrk	C	0.0486542	1.07356	0.534022
Rab27a	C	0.0518032	1.00805	0.153193
Bmp7	C	0.0378312	1.51947	0.0986975
Scube1	C	0.161311	1.79568	0.286599
Impa2	C	0.431773	1.48345	0.185881
Prkcz	C	0.0198457	0.837198	0.13166
Chad	C	0.172739	4.43603	0.692379
Pla2g5	C	0.0194061	1.88681	0.250342
Ppp1r1b	C	0.060009	1.77093	0.478644
Col11a2	C	0.518634	4.23799	0.610427
Mia	C	0.153865	1.97147	0.145005
Col9a2	C	0.327531	3.55457	0.411566
Col2a1	C	1.15387	5.32561	0.951178
3110079O15Rik	C	0.0896044	2.66386	0.173996
Lect1	C	0.549851	4.28768	0.344916
Col9a3	C	0.324719	3.47499	0.318986
Col9a1	C	0.208961	3.19615	0.280209
Ldlrad3	C	0.683185	2.53908	1.98055
Gm973	C	0.159462	0.939753	0.251345
Cybrd1	C	0.0299196	0.928957	0.29376
Igdcc4	C	0.496378	1.5756	0.993341
Ifitm10	C	0.0061644	0.950601	0.455119
Wnk4	C	0.237672	0.977319	0.194595
Tnfrsf10b	C	0.0842752	0.88237	0.532461
Lef1	C	0.230823	0.70793	0.0381973
Fgfr3	C	3.0125	3.08391	0.887498
Lmcd1	C	1.14372	1.76002	0.76585
Peg3	D	1.06154	3.81194	2.86334
Edil3	D	0.326699	2.20611	1.54718
9930013L23Rik	D	0.276909	2.26106	1.28709
A830039N20Rik	D	0.00657153	0.870038	0.534673
Sox9	D	0.280698	2.93068	2.04057
1500015O10Rik	D	2.06329	3.64169	2.87035
Rab11fip4	D	0.250766	2.2142	0.939386
Fam101a	D	0.048903	1.61982	0.705913
Fmod	D	-0.270801	3.08306	3.109
Kcnma1	D	0.251832	3.62273	2.47148
Crispld1	D	0.407386	3.17679	2.08444
Tspan13	D	0.379998	2.82415	1.01822
Trpv4	D	0.606262	2.16795	1.1547
2610018G03Rik	D	0.0734794	2.109	0.807267
Col11a1	D	0.933818	4.26086	2.17633
Susd5	D	0.16266	3.12233	1.34417
Ucma	D	0.190728	2.76556	0.654744
AC110520.1	D	0	1.20316	0.392685
Acan	D	0.405685	4.17093	1.74216
Hapln1	D	0.261951	3.32138	1.58429
Capn6	D	0.170893	1.73652	0.981559
Gm11547	D	0.00861649	1.34621	1.01564
Camk4	D	0.357528	2.17798	1.18002
Shisa2	D	0.455163	2.34731	1.61376
Sox6	D	0.144386	2.46134	2.21248
Cspg4	D	-0.796932	3.01508	4.37746
Nfatc2	D	0.240916	2.4915	2.42253
Wwp2	D	-0.6869	1.53765	0.857883
Tmem56	D	0.093328	1.13503	0.664906
Gpr126	D	0.188705	1.70423	0.640733
Chst11	D	0.898482	1.36083	1.01588
Ica1	D	0.289562	1.27195	1.15906
Mfi2	D	0.125599	2.59635	1.29993
Clec3a	D	0.108033	2.08987	0.99564
Mall	D	0.0472727	0.921354	0.506578
Eps8l2	D	0.11779	1.67693	1.04045
Cytl1	D	0.719318	3.03589	0.988729
Scin	D	0.048017	1.46724	1.01602
Kcna6	D	0.0307479	1.20063	0.372925
Itih5l-ps	D	0.0690233	1.2459	0.693705
Kif21a	D	0.0723962	1.7828	2.19689
Ninj2	D	0	0.603987	0.145442
Hhipl2	D	0.0435229	0.597552	0.273711
Cobll1	D	0.348905	1.5435	1.06743
Mgat4a	D	0.900148	2.86876	2.07709
Zfp385b	E	0.23647	1.75386	2.82883
Cpe	E	-0.81114	3.61206	4.09001
Hbegf	E	-0.145462	2.58152	4.07365
Sox5	E	-0.111747	0.759688	2.53254
Dusp14	E	0.0443108	0.986322	2.21513
Thrb	E	0.478338	1.23991	3.03348
Fxyd5	E	-1.69131	1.24547	3.65321
Ninj1	E	-0.0882873	2.10381	3.86777
Gch1	E	0.0488084	1.33837	2.66213
Higd1a	E	0.131797	0.868236	2.86751
Gm9790	E	0.517958	1.19354	2.30527
Cdr2	E	0.569076	1.57473	3.4263
Ccbp2	E	0.0842559	0.185986	2.53431
Inhba	E	0.528362	0.718881	3.54546
Apold1	E	0.209317	0.087561	1.17294
Doc2b	E	0.0554767	0.116683	0.9748
Prg4	E	-1.32852	-1.03747	5.94819
Htra4	E	0.477112	1.0004	4.88507
Aldh1a3	E	0.298771	0.60032	3.00699
Gprc5a	E	0.257835	0.884755	2.79693
Pcsk6	E	-0.512701	1.3166	4.55335
Barx1	E	0.0182422	0.146993	1.53609
Stk32b	E	0.0649643	0.67345	2.09945
Rasgef1a	E	0.0624363	0.0989721	1.36572
Acp5	E	0.102021	0.641414	2.18143
Cdr1	E	0	0.118	0.973565
Scara3	E	-1.23338	-3.00249	0.754996
A4galt	E	0.947058	0.946509	3.52364
Lnx1	E	0.192224	0.254953	2.14535
Metrnl	E	0.0755263	0.471411	3.77732
Gnpnat1	E	0.806605	1.05577	3.32815
Dok5	E	0.0441332	0.141139	1.15677
Rgs5	E	0.411511	0.289873	1.70668
Gchfr	E	0.00978994	0.264209	0.950459
Tmem196	E	0.0167973	0.0350242	1.02343
Col22a1	E	0.137465	0.821423	2.54279
Megf10	E	1.04227	0.699362	2.22755
Trhde	E	0.0159316	0.233368	1.29658
Hid1	E	0.0580917	0.350571	1.16106
2210407C18Rik	E	0	0.0585053	0.712279
Sdk1	E	0.0624976	0.21863	1.58683
Kcnc2	E	0.0338662	0.0668578	1.07668
Fam134b	E	0.212462	0.80203	2.36452
Procr	E	0.246684	0.43295	4.05907
Prune2	E	0.0547569	0.368706	2.29388
Grid2	E	0.0766476	0.268845	0.797452
Ttll7	E	0.215156	0.336066	1.15331
Sv2c	E	0.172815	0.0500213	2.1106
Pkp1	E	0	0.0883726	0.80845
Calcrl	E	0.45755	0.604308	2.46676
Dlx3	E	0.0562384	0.207579	1.83696
Gm17455	E	0.0108524	0.443612	2.9093
Cmtm8	E	0.0285454	0.13859	0.801235
Matn4	E	0.163351	1.05796	2.19543
Sema3a	E	0.116744	0.300176	2.08715
Itga6	E	0.390324	1.14714	3.04975
Tmod1	E	0.085693	0.32175	1.30979
Cystm1	E	0.307317	1.13914	2.27641
Gpr1	E	0.101688	0.0720722	1.82729
0610040J01Rik	E	0.00919238	0.100186	1.01153
Rab37	E	0.0803905	0.10622	1.37703
Sema3f	E	0.203623	0.429378	1.4956
F13a1	E	0.35759	1.57365	3.54984
Clic5	E	0.630614	0.263537	2.58071
Tspan15	E	0.151916	0.344959	2.68521
Gm12680	E	0	0	0.614824
Mfap3l	E	0.0448268	0.528513	2.65615
Khdrbs3	E	0.199437	0.458399	1.27065
Efnb2	E	0.113431	0.99092	2.21851
Sparcl1	E	0.0858247	1.82888	3.70986
Serpinb1a	E	0.0203687	0.232709	1.87533
Slc4a8	E	0.0521539	0.369337	1.15546
Rgcc	E	-1.07173	-2.3687	0.42144
Spsb4	E	0.0386457	0.216772	1.01394
Aqp1	E	0.018935	0.831007	4.40844
Msn	F	-3.18389	-1.67017	1.18297
Tmbim1	F	-2.88459	-1.64681	1.55441
Gpr64	F	0.330198	1.09594	4.12087
Rcan1	F	-0.851534	2.17258	5.00014
Plec	F	-2.97624	-1.58823	1.68243
Prnp	F	-3.23343	-0.338781	2.73588
Thbs3	F	-1.37498	1.01637	4.04153
Fbln7	F	-0.4405	2.06859	5.76496
Lgals3	F	-1.2981	2.2657	6.1179
Anxa8	F	-0.804521	1.44009	5.59533
Fn1	F	-4.44192	0.160736	4.94358
Cd109	F	-1.25089	1.61573	5.74664
Ugdh	F	-2.67391	-1.32173	2.85919
Mustn1	F	0.0933552	1.07157	4.07572
Camk1d	F	-0.426959	1.02594	3.8944
Ccdc109b	F	0.0767575	0.290001	3.66449
Cav2	F	0.113102	1.20022	3.36699
4632428N05Rik	F	0.585394	1.91715	4.55368
Uap1	F	-2.56142	-1.92971	1.82801
Hr	F	0.0618377	1.10726	2.61881
Ltbp3	F	-1.1988	-2.15696	1.1492
Plp2	F	-1.84077	-0.510717	2.08366
Gm6169	F	-0.0296648	0.959251	2.83894
Tspo	F	-2.03588	-0.876737	2.59541
Cyb5r3	F	-3.79172	-1.60454	1.77123
S100a6	F	-3.48284	-0.715333	2.6313
Cdh13	F	-0.305857	0.303692	5.91677
Crip1	F	-2.66769	-1.32377	3.03507
Dnm1	F	-0.790189	1.55581	4.93004
Cav1	F	-0.922845	0.423104	5.98805
Ahnak2	F	0.160682	1.55056	6.14624
Nbl1	F	-1.49223	1.13412	6.49825
5730416F02Rik	F	0.0762126	0.857746	3.02491
Capg	F	-1.59549	0.947335	6.06587
S100a10	F	-3.16445	-1.22393	2.1602
S100a4	F	0.145899	1.74532	4.9558
Ybx3	F	-2.60692	-1.39938	1.59112
Cd44	F	-1.10339	0.330069	4.29642
Fyn	F	0.510055	1.50994	4.51701
Aebp1	F	-1.1036	-0.0291968	3.83494
Timp2	F	-1.71823	-1.86365	1.73806
Fam129a	F	-0.890066	0.0931321	3.38954
Glud1	F	-2.07093	-1.88249	1.59608
Klf4	F	-3.60427	0.0262437	3.22446
Gem	F	-0.681831	1.61627	5.43539
Atf3	F	-1.23361	1.99244	4.77896
Lmna	F	-3.04781	-1.07262	1.34668
Anxa2	F	-2.34557	-2.32607	1.31802
Ndrg1	F	-1.7615	-0.57867	2.78378
Htra1	F	-2.06955	-2.78184	1.69403
Osr2	F	0.115527	1.11532	3.29632
Htra3	F	-2.74402	-1.88825	1.6142
Tspan5	F	0.464422	0.819664	3.18737
Vim	F	-2.34922	-2.23944	1.51781
Ptrf	F	-2.11087	-2.35112	1.4546
Anxa1	F	-1.81621	-3.10424	1.29147
Ecm1	F	-1.15514	-5.48627	1.25918
Tmem43	F	-1.67554	-1.91908	2.29745
Cxcl1	F	0.702618	1.75339	4.49901
Nova1	F	0.0522278	0.498911	2.15343
Dock11	F	0.18999	1.13953	3.46258
Tubb6	F	-1.25307	0.677426	3.63848
Ndrg4	F	0.267323	0.630513	3.67627
Pqlc3	F	0.773517	1.60779	4.86343
Anxa3	F	1.23219	0.687878	4.62146
Serpinb6a	F	-2.52692	-2.57071	2.03784
Fez1	F	0.0716585	0.574442	2.95104
Sulf2	F	0.381551	1.69467	4.63254
Arl4a	F	-0.354872	1.53784	3.72638
Crip2	F	-2.27896	-2.29194	2.28699
Fhl1	F	-1.46977	-2.05093	2.45858
Pamr1	F	0.290419	0.795366	4.67449
Axl	F	-1.87763	-3.38971	2.07547
Col3a1	F	-2.88145	-2.56117	3.05637
Dcn	F	-2.35021	-2.10162	3.0549
Fam124a	F	0.0979084	0.642983	3.57218
Steap3	F	0.58445	1.71256	5.62375
Sema3c	F	0.196793	1.33368	5.79932
Gfpt2	F	-3.13388	0.0355448	3.7293
Sod3	F	-2.57728	-3.11386	3.34464
Gsn	F	-3.86656	0.189408	3.8087
Ablim1	F	0.995983	0.798782	6.17173
Cdon	F	-1.27853	0.214094	5.66081
Ssc5d	F	0.171971	0.733202	5.25309
Medag	F	0.129587	0.671293	4.91667
Tppp3	F	0.0242368	0.818905	6.35342
Cxcr7	F	-0.535825	0.455565	6.57278
Ntn1	F	-0.485874	0.412796	6.0647
Tnxb	F	-0.334031	0.753396	7.54463
Cilp	F	-0.253336	0.825795	4.661
Creb5	F	0.0831845	0.893167	4.79186
Sema3e	F	0.170668	0.650608	3.84924
Ntn4	F	0.339665	1.17158	4.34826
Arhgap44	F	0.0508885	0.736067	2.47373
Radil	F	0.107717	0.464463	2.29306
Mgll	F	0.429667	1.22915	3.86903
Fam126a	F	0.821056	1.029	3.90823
Sirpa	F	0.729498	1.39276	3.95774
Gas1	F	-1.41213	-3.97433	1.73528
Dpt	F	0.179482	1.29167	6.00224
Hspb8	F	0.283527	0.841473	5.53383
Lrrn4cl	F	0.718069	0.957794	6.12906
Ly6a	F	-0.510408	0.249653	6.04016
Ly6c1	F	0.457589	1.39476	6.43416
Has1	F	-0.633843	0.322477	5.98959
Pdpn	F	0.071411	1.15024	4.17245
Cd248	F	1.13833	0.558683	4.83638
Nov	F	0.0792176	0.765	4.32361
Vat1	F	-1.02065	-0.621803	2.12715
Cd55	F	0.51181	0.509958	4.30523
Emilin2	F	0.491337	0.698737	3.8829
Gda	F	0.693075	1.07676	4.27022
Pcolce2	F	0.248012	2.20109	4.82199
Tmem100	F	0.848551	0.674705	3.85656
Gprc5b	F	0.489858	1.11601	3.24106
Map6	F	0.352872	0.453279	3.6233
Mt2	F	-1.84552	-0.922867	2.37274
5430435G22Rik	F	0.169432	0.68252	3.01231
Ppp1r14b	F	0.857578	1.44215	3.36484
Gm7332	F	0.67026	1.15625	2.73892
Dpp4	F	0.0636208	0.250649	1.88183
Cadm3	F	0.127351	0.352984	2.77012
Cd34	F	0.407863	1.52736	4.62897
Clec3b	F	0.0570896	0.544924	3.22867
Mfap5	F	0.590242	1.14181	4.33084
Col14a1	F	0.228461	0.883721	4.31157
Hmcn2	F	0.370996	0.869455	3.47909
Gpr133	F	0.467953	1.18388	3.77111
Tmod2	F	0.892817	0.423642	3.40747
Igfbp6	F	-0.571527	1.45078	6.99873
Fbln2	F	0.428443	1.53337	5.72805
Ltbp4	F	-0.341854	0.985576	5.38671
Itgbl1	F	0.206263	1.10757	3.7904
Myoc	F	0.434194	1.86895	4.73179
Tgfbi	F	-0.319076	1.43777	5.16372
Anpep	F	0.396249	0.339127	3.52445
Galnt15	F	0.172682	0.771783	3.45495
Plat	F	0.305264	1.3581	4.33033
Ppl	F	0.124528	0.28062	2.94615
Rnase4	F	-1.4286	-3.79326	0.941058
Gpnmb	F	0.138036	1.10889	4.05504

## Sheet: Endothelial cell distribution
Cell type*:	Endothelial clusters and groups:
	E1	E2	E3	E4	E5	E6	E7
	Doublets	Pericytes	AEC like		Arterial	Transition	SEC like
Young AEC	1	4	24	26	19	8	2
Old AEC	0	3	34	27	16	2	0
Young SEC	9	0	0	0	0	2	59
Old SEC	4	1	2	6	2	12	44
Total:	14	8	60	59	37	24	105
*cell types identified by index sorting

## Sheet: Endothelial ICGS clusters
Gene Symbol	Row ID	E1	E2	E3	E4	E5	E6	E7
Gnai1	a	4.49468	0.22719	0.226288	0.472344	0.331931	0.410323	0.476861
Gpr153	a	4.26444	0.542118	0.267345	0.387527	0.210317	0.806929	0.33485
Csmd1	a	5.43036	1.4603	0.0684972	0.0985914	0.205045	0.0931617	0.346841
Chl1	a	3.39557	0	0.0267264	0.13209	0.0232031	0.0669547	0.0206167
Cldn10	a	4.31775	0	0.0421136	0.154946	0	0.0904507	0.24433
Efemp1	a	4.62421	0	0.126942	0.241439	0.0593875	0	0.0244186
Ptprd	a	6.7593	0.216366	-0.381113	0.0537458	0.148084	0.3639	0.391583
Adcy2	a	5.49394	0.353955	0.178673	0.287399	0.31796	0.242402	0.459485
Maob	a	3.44183	0	0.0290334	0.256279	0.0412095	0.0573285	0.163843
Gpm6b	a	5.38977	0	0.098208	0.273304	0.017902	0.0540364	0.483196
Kcnip3	a	4.44074	0	0.0386018	0.0550005	0.0580888	0	0.236932
Tnfrsf19	a	5.79255	0.147652	0.0493719	0.0946772	0.0718284	0.0464316	0.295754
Serpina3c	a	4.48568	0	0.041762	0.0358464	0	0	0.101144
Plekhh2	a	5.07881	0.49288	0.08114	0.294786	0.0880825	0.0669547	0.175464
Ccrl1	a	7.33157	0	0.113256	0.245089	0.233093	0.288771	0.365771
Pappa	a	7.32428	0.309598	0.195152	0.455702	0.403213	0.186025	0.556754
Slc26a7	a	6.53166	0	0.100123	0.132194	0.0462253	0	0.327927
G0s2	a	3.34404	0	0.114589	0.171478	0	0.0451735	0.131547
Podn	a	4.03216	0.359793	0.0610476	0.234832	0.443214	0.21652	0.361023
Epb4.1l4b	a	4.14668	0	0.0402276	0.225216	0.278451	0.132639	0.314644
C2	a	3.80509	0.984863	0.0304808	0.272021	0.390959	0.25494	0.348063
Col5a3	a	4.03314	0	0.154877	0.3751	0.268395	0.272391	0.518677
Rspo3	a	2.46161	0	0.0704524	0.148584	0.0981216	0.0448615	0.111656
Mrc2	a	3.29802	0.388169	0.13767	0.190892	0.0232031	0.0577252	0.0978093
Negr1	a	2.94587	0.162368	0.0146895	0.0245743	0	0	0.133092
Srpx	a	3.28079	0.111459	0.0433586	0.0908761	0.184104	0.145508	0.239797
Apod	a	3.09089	0	0.115681	0.429535	0.0949753	0.178629	0.314569
Cfh	a	7.35881	1.10206	0.327032	0.717829	0.198529	0.117799	0.598364
C4b	a	7.69906	1.26333	0.409911	0.365993	0.154177	0.130875	0.685602
Hp	a	9.40857	0.381137	0.0243913	0.209186	0.127113	-0.174497	0.784681
Tnc	a	8.86302	1.19172	0.597057	1.03812	0.414307	0.211881	0.696129
Chrdl1	a	8.03132	0	0.292327	0.493063	0.122018	0.0346906	0.589512
Cdh11	a	7.94589	0.446639	0.348684	0.933106	0.284194	0.0785372	0.608701
Cxcl14	a	7.58559	0	0.25005	0.495731	0.280884	0.20261	0.695981
Agt	a	7.32301	0.281122	0.213051	0.376433	0.151174	0.166069	0.474589
Fgf7	a	4.3586	0.118753	0.0945384	0.212393	0.0596831	0	0.153275
Ogn	a	6.56693	2.36419	0.204447	0.403223	0.0965902	0.0997277	0.405269
Fgfr2	a	7.40862	0.287703	0.396358	0.748632	0.377629	0.39209	0.580379
Grem1	a	5.54545	0	0.0530068	0.419863	0.0732065	0	0.4648
Gpx3	a	9.66771	-0.454311	0.221177	1.15333	0.103066	-0.61221	1.11559
Pdgfra	a	6.14026	0.0882405	0.274472	0.650591	0.269817	0.189363	0.291964
Mdk	a	4.19652	0	0.0250426	0.264239	0.255323	0.232845	0.290143
Islr	a	7.71618	2.72372	0.408274	0.64879	0.177044	0	0.550634
Plxdc2	a	7.21705	1.15385	0.299443	0.744195	0.163942	0.042704	0.5008
Epdr1	a	6.74645	1.10553	0.0747287	0.635134	0.0385263	0.0346906	0.338759
H2-Q10	a	5.35464	0.133448	0.421674	0.488394	0.20299	0.473702	0.56079
Ccbe1	a	3.75562	0	0.0839533	0.012889	0.100226	0.0506677	0.270958
Esm1	a	7.74647	0.337394	0.281918	1.35254	0.709507	0.0939073	0.590072
Ms4a4d	a	4.94106	0	0.167626	0.234759	0.236511	0.0265221	0.0947268
ENSMUSG00000103441	a	2.9242	0	0	0.193656	0.017902	0.0358332	0.289378
Lepr	a	9.01841	-0.325606	0.668378	0.755697	0.18504	-0.446519	1.83282
Shox2	a	2.9458	1.53134	0.0799383	0.353657	0.269296	0.146401	0.377814
Cp	a	8.27626	1.10968	3.52148	2.93519	0.781219	1.13975	0.95568
Lox	a	5.35867	1.64175	2.82121	0.45414	0.0333206	0	0.226588
Mgp	a	6.60828	3.03679	4.91332	1.18165	0.237565	-0.244818	1.1505
Angptl1	a	2.87546	0	0.096634	0.136191	0.103526	0	0.0594894
Fbln1	a	3.38239	0.118753	0.189582	0.117341	0	0.0346906	0.0154237
Cpxm1	a	4.4723	0	0.0460014	0.179634	0.129676	0	0.331132
Runx2	a	4.30027	0.450071	0.222877	0.354788	0.361744	0.790563	0.314205
Cdh2	a	5.49931	0.727518	0.0286853	0.196436	0.0866712	0.0265221	0.627231
Egfr	a	6.00276	1.98494	0.295397	0.582332	0.41398	0.584982	0.501916
Igsf3	a	5.94039	0.133448	0.616346	0.717509	0.1562	0.0858801	0.365819
Wisp2	a	5.41812	0	0.14441	0.166268	0.208413	0.0996824	0.500874
Cldn1	a	3.6584	0.118753	0	0	0	0.042704	0
Podnl1	a	5.46869	0	0.117207	0.259352	0.331779	0.0519453	0.47663
Fhl2	a	5.60464	0.246402	0.114871	0.375118	0.0385263	0.0487338	0.138664
C3	a	5.44772	0.273008	0.313863	0.245154	0.449603	0.198386	0.481753
Enpp1	a	4.60676	0	0.229092	0.197104	0.0190643	0	0.284621
Gpx8	a	6.11439	2.43263	0.106561	0.598306	0.092747	0.0933831	0.202502
Abca8a	a	4.79591	0	0.1048	0.197324	0.0446653	0	0.00859536
Hmgcll1	a	3.67457	0	0	0.032009	0.0869121	0	0.0204099
Scara5	a	4.36752	0	0.170704	0.163755	0.179096	0.0442532	0.160721
Ltbp2	a	5.57982	0.154255	0.147699	0.211288	0.41907	0.0333095	0.0899313
Abi3bp	a	5.95623	0	0.343174	0.477937	0.350612	0.215311	0.290451
Smoc1	a	5.25574	0.118753	0.0200063	0.0779519	0.226315	0.242135	0.349559
Spp1	a	7.21743	0.0882405	0.636931	0.862577	0.261918	0.0752559	0.695303
Ibsp	a	9.83954	0.620874	0.339243	0.685925	0.541864	0.616438	1.51182
P2rx2	a	4.66689	0	0.0100021	0.0170147	0	0	0.0601078
Cyp1b1	a	7.94744	0.154255	0.219899	0.659471	0.405085	0.350281	0.405173
Loxl1	a	6.09621	1.75951	0.12375	0.261553	0.228485	0.0861306	0.382705
Mme	a	6.47306	0.592297	0.114095	0.21245	0.269473	0.0949209	0.562633
Sfrp4	a	8.35366	0.118753	0.725296	0.659414	0.365509	0.114004	0.680108
Adipoq	a	8.41813	0.189742	0.286906	0.394511	0.108003	0.335843	0.682093
Kng1	a	5.90218	0	0.0730581	0.0612948	0.15046	0	0.225573
Gdpd2	a	8.52613	0.118753	0.20684	0.459716	0.343051	0.108787	0.742827
Svep1	a	7.05903	0.281122	0.236809	0.0689104	0.352381	0.242904	0.302414
Dpep1	a	8.11867	0.240547	0.173439	0.209024	0.233464	0	0.478099
Kng2	a	5.91208	0.118753	0.121807	0.114179	0.0368879	0.0464316	0.227785
Ddr2	a	6.6936	4.42143	0.30718	1.39734	0.621579	0.280407	0.672944
Susd2	a	5.48139	3.78327	0.0427872	0.316751	0	0.504362	0.288004
Clmp	a	5.26043	0.154255	0.08774	0.696714	0.257107	0.171389	0.782593
Loxl3	a	3.68132	1.25967	0.136678	0.33597	0.0802427	0.0865009	0.267639
Pcolce	a	7.20131	3.45182	0.597441	0.816923	1.44646	0.43825	0.719286
Igf1	a	5.0143	0.132061	0.268738	0.490928	0.691536	0.111722	0.637792
Colec12	a	7.21282	0.1997	0.168415	1.54932	0.409281	2.14554	1.68914
BC039771	a	3.18067	0	0.0760073	0.238494	0.0653118	0.206609	0.207711
Lbp	a	6.9569	0.154255	0.406111	1.84783	0.595213	2.26161	2.31045
Cygb	b	3.57527	3.63966	0.269814	0.406549	0.0578345	0	0.605362
Olfml2b	b	4.65072	1.70877	0.168475	0.565148	0.165589	0.0931616	0.127626
Daam2	b	3.94324	4.26742	0.15372	0.283676	0.0882015	0.0752559	0.404658
Adamts2	b	7.87475	2.20184	0.357179	0.717056	0.919787	0.278553	1.11909
Irs1	b	4.57691	3.02824	0.314036	0.490497	0.250306	0.225367	0.43985
Col1a2	b	7.78972	3.253	0.796829	1.14007	0.531872	0.160144	0.797933
Zfhx4	b	5.36835	2.42676	0.193964	0.466057	0.0946578	0.0598316	0.0942186
Il34	b	5.83163	5.07093	0.0855711	0.211536	0.0232031	0.0423539	0.379516
Lrp1	b	8.21975	6.24235	1.02304	1.3006	0.605718	0.463043	0.58246
S1pr3	b	5.97187	7.86279	0.346291	0.47088	0.354238	0.15023	0.386593
Thsd4	b	6.24137	6.62638	0.210217	0.30154	0.176272	0.0752896	0.383636
Notch3	b	6.8578	9.95425	0.473316	0.824015	1.0271	0.407791	0.668307
Lhfp	b	7.26302	5.78534	0.222697	0.618024	0.0746163	0	0.3382
Pdgfrb	b	8.00821	7.26912	0.306736	0.619196	0.108317	0.0600736	0.350556
Rbms3	b	4.73463	4.6355	0.326619	0.878872	0.0232031	0.285986	0.266807
Ptpn13	b	4.15913	0.834948	0.073952	0.438413	0.28962	0.272093	0.332164
Sdc2	b	4.84159	3.40759	0.236964	1.00551	0.465723	0.279514	0.33276
Ggt5	b	4.7925	2.69019	0.155399	0.110881	0.183378	0	0.337619
Serpine2	b	9.70873	6.81279	0.0223607	0.723452	0.822513	0.113215	1.11272
Serping1	b	9.45707	7.68955	1.28244	1.21942	0.309885	-0.500881	0.716584
Igfbp5	b	9.06857	8.6181	0.0604361	0.861492	0.156924	0.234321	1.10849
Bmp5	b	2.66186	1.29268	0.149054	0.147798	0.0808985	0	0.0980492
Runx1	b	6.09972	4.15355	0.634593	0.995677	0.457496	1.16958	0.73934
Fap	b	4.6746	1.33532	0.154794	0.878861	0.334836	0.322022	0.206443
Speg	b	4.205	4.23976	0.160921	0.476198	0.297139	0.905838	0.711746
Col6a2	b	5.85585	3.95615	0.310299	0.786668	0.385005	0.282164	0.554077
Col6a1	b	7.02254	4.18419	0.283959	0.557223	0.277817	0	0.390501
Dock7	b	4.33764	2.10744	0.0753653	0.205035	0.345017	0.166217	0.283375
Arhgap42	b	3.82095	2.7186	0.122152	0.252733	0.124687	0.17687	0.0931311
1500009L16Rik	b	4.09039	3.17254	0.148566	0.389443	0.415168	0.569898	0.483465
Tusc5	b	2.49256	1.87377	0.0598235	0.108349	0	0	0.0267961
Steap4	b	6.40638	3.20586	0.136924	0.494795	0.017902	0.0705238	0.16509
Gpc6	b	4.40311	3.41758	0.0999932	0.334264	0.15116	0.0692261	0.203503
Arhgap24	b	3.7914	2.94776	0.197801	0.213183	0	0.0358332	0.0213531
Heyl	b	3.25847	2.77274	0.153279	0.289756	0.187437	0.089434	0.171056
Gas1	b	4.11136	2.18041	0.240557	0.611484	0.395248	0.361974	0.329062
Pcdh18	b	2.56917	2.18626	0.0949345	0.233719	0	0	0
Fst	b	4.41665	1.3594	0.0168998	0.155802	0.0975273	0	0.256451
Pid1	b	4.09749	3.22808	0.0815677	0.104562	0.063453	0.0588943	0.144493
Sema5a	b	4.08705	3.41085	0.103526	0.432715	0.0533506	0	0.278177
Kirrel	b	5.31047	6.71791	0.268223	0.378918	0.156135	0.238044	0.693904
Ednra	b	4.02517	7.08397	0.088308	0.345527	0.073742	0.204024	0.315151
C1s	b	4.89095	7.27004	0.257537	0.574233	0.0369941	0.129957	0.224028
Fxyd1	b	4.07357	6.23863	0.225807	0.492351	0	0	0.181543
Fat1	b	6.65353	7.28143	0.345381	0.772611	0.267549	0.201095	0.317935
Arhgef17	b	4.86759	6.97887	0.301866	0.564691	0.35148	0.161889	0.407019
Plce1	b	2.52358	5.6552	0.172651	0.332033	0.225618	0.0861306	0.163371
Prrx1	b	3.61596	2.8521	0.0818571	0.410418	0.175864	0.14133	0.223505
Arhgef10l	b	2.78222	4.25744	0.152879	0.345972	0.232437	0.129429	0.401426
Antxr1	b	5.77381	4.35666	0.718407	0.716816	0.32301	0	0.649236
Ptprs	b	4.38773	5.6931	0.461451	1.11891	0.800696	0.803102	0.683819
Gpc1	b	2.97125	2.53827	0.1888	0.211607	0.19871	0.33952	0.380535
Lpl	b	7.26903	4.34958	-0.331987	-0.0236051	4.0916	0.383748	2.1209
Plxnb1	b	3.13558	4.56254	0.266242	0.702696	0.515917	0.188365	0.350122
Arhgef25	b	2.97773	5.33523	0.432643	0.787271	1.01105	0.581269	0.375437
Sntb1	b	1.83391	4.12939	0.154867	0.347989	0.619687	0.120735	0.132805
AC158608.1	c	0.348933	4.47862	1.34544	2.53	0.276998	0.627035	0.440308
Mir22hg	c	1.6807	5.18559	2.6019	4.08555	0.380681	0.920929	1.14019
Il6	c	0.524494	4.39725	1.67736	2.99086	0.449381	0.990472	0.159435
Tnfrsf12a	c	0.138617	3.6501	2.41263	3.04994	0.679048	1.31417	0.592008
Uap1	c	1.74432	4.76804	4.11031	3.83731	-0.243554	0.663406	-0.393692
Emp1	c	0.845824	-2.82808	2.13943	2.55986	-2.05721	0.180583	-3.04922
Lmna	c	-1.08422	3.96108	2.32289	2.53824	-0.262105	-1.32461	-3.53897
Azin1	c	-0.92204	1.7936	2.32225	1.97742	-1.17415	-2.74539	-2.74279
Slc20a1	c	-0.68299	2.34462	3.14672	3.76469	0.747323	1.11517	-0.58349
Hbegf	c	1.35782	4.28245	2.22791	4.91381	0.792683	2.05321	0.462272
Sqstm1	c	-1.06031	1.70552	0.300233	1.42643	-2.09152	-0.801929	-1.94352
ENSMUSG00000104126	c	-0.609096	1.69013	0.26231	0.672527	-0.653163	-0.449022	-0.688479
Gm12346	c	-1.32722	2.10304	0.915688	1.60878	-0.877442	-0.0433545	-0.959948
Neat1	c	-0.767024	3.74312	1.24292	2.21043	-1.18672	-1.2987	-2.56099
Gadd45b	c	-0.393783	6.83138	2.43267	3.69573	-0.371048	0.903035	-0.960131
Irf1	c	-0.901383	2.54144	0.776787	2.03037	-2.15803	-0.959404	-2.3284
Ier3	c	-1.85616	1.70591	0.880218	1.81648	-2.06711	-1.47298	-2.23541
Ppp1r15a	c	-2.45918	2.09043	0.900894	1.2659	-3.70393	-2.22421	-2.57771
Atf3	c	-1.39144	4.49564	2.27257	2.76874	-2.50998	-1.73618	-2.78004
Arid5a	c	-0.682511	3.13268	0.816108	1.97271	-1.49296	-0.816145	-1.27128
Slc25a25	c	0.566394	4.96511	2.64743	3.06421	-0.208251	0.599155	0.583394
Ubc	c	-0.648903	1.43116	0.488353	1.09323	-1.60816	-0.533524	-0.629901
Nfkbia	c	-2.37531	1.26214	0.04438	1.10784	-2.00429	-0.904702	-1.33081
Slc38a2	c	-1.12947	1.90335	0.501005	1.53054	-2.36708	-0.317036	-1.83095
Zfand5	c	-1.37294	1.21878	-0.23634	0.905034	-2.21596	-0.876158	-1.16226
Mafk	c	-0.0159398	5.06763	2.84684	3.0656	0.483863	0.896503	-0.422548
Rel	c	1.09595	2.93217	2.50522	3.98797	0.764167	1.73369	0.600637
Nr4a1	c	-2.73809	3.47231	-0.339291	1.50809	-4.52542	-2.06625	-1.86996
Fosb	c	-2.32318	2.43526	-0.192821	0.528883	-3.53492	-2.75528	-1.65733
Nr4a2	c	-1.04877	4.26442	2.11364	2.85491	-1.49617	-0.362616	-0.464502
Bhlhe40	c	-2.97504	-0.650488	0.192985	0.714205	-3.34522	-2.45141	-1.63871
Hes1	c	-0.850165	1.87814	1.37555	1.43046	-0.591671	-1.2258	-1.22705
Erf	c	-2.3435	1.76529	-0.0887133	1.57587	-2.39042	-0.336854	-1.41554
Hspa1b	c	-2.26902	1.99788	2.05724	2.38583	-0.522614	-0.529368	-1.75519
Chka	c	1.39399	4.65139	2.40587	4.34975	-0.0850226	1.23532	0.409335
Ifrd1	c	-1.66222	3.15483	-0.173481	1.49739	-3.05033	-1.01053	-1.80691
Csrnp1	c	-1.07329	2.47185	1.36038	2.74768	-2.45726	-0.753207	-0.171118
Cdkn1a	c	-2.19221	1.50979	-0.166133	1.74651	-2.59925	-1.03516	-1.88803
Gm17024	c	0.603078	3.64397	1.69368	2.39176	0.43317	1.4621	1.03448
Nr4a3	c	0.802681	6.42019	2.60943	3.70421	0.404334	1.58886	1.26197
1700064E03Rik	c	1.12046	3.32857	2.19155	3.15936	0.422218	1.01057	1.19153
Kdm6b	c	-1.30047	1.24022	-0.235109	1.20056	-2.05016	-1.42144	-1.32329
Pde4b	c	-1.15679	5.19642	1.93553	3.08558	0.264453	1.2969	-1.18672
Litaf	c	-2.86799	0.309263	-0.599444	0.965617	-1.76744	-0.300948	-1.53546
Adamts9	c	-1.81466	2.14019	-0.730048	0.830583	-2.16808	-0.392526	-1.18774
Skil	c	-1.06902	-1.46925	0.720419	1.55946	-2.01249	0.606164	-2.18888
Map2k3	c	-1.07094	2.32556	-0.00112841	1.91469	-2.37198	-1.22899	-1.08218
Gm5424	d	0.117552	0.628819	2.05538	1.02892	0.62913	0.0498168	0.143139
Ass1	d	0.210567	0.498989	1.57429	0.999937	0.830696	0.548407	0.225716
Gja5	d	0.104769	1.43618	4.70486	1.38398	0.443574	0.441561	0.188402
Sulf1	d	3.9842	2.49723	4.97663	1.24444	0.551649	-0.630252	-0.146366
Nuak1	d	1.02324	1.14061	3.90223	1.81064	0.965029	0.228098	0.187439
Col5a2	d	5.02293	1.97769	3.79493	1.12396	0.218575	0.0420024	0.10811
Emp3	d	4.10281	3.1304	3.6683	2.7667	1.39253	0.957465	0.0564723
Tmem100	d	0.0617345	1.82047	2.40764	0.478499	0	0.0318578	0
Ptprr	d	0.070316	1.12633	3.32117	1.81596	1.63856	0.152374	0.0168556
Mall	d	0	0	4.09755	1.51472	1.52138	0.243367	0.111649
Klf12	d	0.537875	1.19336	2.26411	2.85361	0.434526	0.13647	0.0500359
Ssu2	d	0.492163	0.147652	3.25654	2.57601	1.59477	0.386384	0.0119675
Cst3	d	1.65014	1.1637	1.75939	0.0475583	0.33139	-1.5469	-1.36939
Fbn1	d	7.30302	0.972786	5.20348	3.52519	2.07179	0.0442532	0.436023
Syt11	d	0.0651623	2.5402	2.8877	1.55678	0.420475	0.204058	0.032885
Edn1	d	0	0.62042	4.32775	1.75034	0.421032	0.509325	0.0761929
Epha4	d	0	1.98798	3.60437	3.61091	1.3308	0.651256	0.392943
Kcnn4	d	0.474658	1.05334	4.33703	0.689178	0.776968	0.3788	0.349827
Prdm16	d	0.660783	4.3405	4.25871	1.74542	1.83915	0.988275	0.390651
Bmx	d	0.361567	0.875943	3.80414	1.02475	0.604268	0.0265221	0.0566912
Itpr3	d	-0.0791184	-0.568829	3.10457	1.96138	0.982004	-0.0934169	-0.520796
Arhgef28	d	0.139584	1.41731	3.83596	3.37236	1.64717	0.858168	0.256152
Fhl1	d	1.97627	1.92725	5.36212	2.81989	2.74805	0.467461	0.437415
Clu	d	6.49571	0.837006	7.4658	2.56101	0.992623	-1.05457	-0.900152
Itgb4	d	-0.14453	0.460822	4.00249	3.38436	0.704087	-0.360142	-0.526411
Prune2	d	0	0.491306	3.06193	1.45654	0.275972	0.286565	0.0318341
Cd24a	d	0.0795792	1.96236	4.8491	2.66235	0.394988	0.480917	0.049993
Gprc5a	d	0.138617	0.111459	5.18093	2.89472	0.962319	0.66638	0.153472
Col8a1	d	5.44637	1.43006	5.40609	2.65748	0.825974	0.0752896	0.176341
Vegfc	d	4.73673	1.02881	6.09617	3.94931	1.72497	0.0820255	0.245989
Eps8l2	d	0.221445	1.37736	5.38874	1.68272	1.13758	0.358949	0.374655
Cdk19	d	-1.339	0.0376163	3.90839	2.17162	0.0292034	0.0924862	-0.965566
Atp2a3	d	-0.851902	6.18634	6.36341	2.03594	2.60038	-0.152483	-0.573895
Mecom	d	0.0692578	1.29121	4.96133	4.4862	3.13287	1.35751	0.202919
Ace	d	2.2356	1.33837	6.46531	3.16347	1.61199	0.182385	-0.669216
St8sia6	d	0.101103	0.133448	5.1873	2.31767	1.34703	0.239432	0.0577412
S100a4	d	0	1.70907	3.82557	1.57858	0.829552	0	0
Alpl	d	1.47858	1.16743	6.38725	1.83409	1.14596	-0.441204	-0.525152
Stmn2	d	0	2.17193	7.1273	3.93437	2.14492	0.295575	0.0259178
Fn1	d	-0.78025	2.33307	7.23841	3.36916	1.6581	-0.778963	-1.22975
Ptprj	d	0.876136	1.67102	2.8698	0.766211	0.720365	-0.189386	-0.259453
Ccnd2	d	0.283853	2.82244	2.97533	1.81299	-0.771171	-1.22415	-1.96918
Ssfa2	d	-1.13966	1.36643	1.58601	0.634728	-1.34778	-0.785816	-2.24229
Tox2	d	0.247347	2.33114	2.81344	1.66236	0.523731	0.655589	0.382287
Amd1	d	0.336821	1.37	2.65057	2.41005	0.903042	0.734549	0.528732
5730416F02Rik	d	0.0617345	0.209298	1.41141	0.755317	0.553921	0.303008	0.0694432
Scd1	d	0.816571	0	1.96998	0.791825	0.140679	0.368655	0.0265223
Cd9-ps	d	0.0581347	0.187564	1.4158	-0.0353338	0.0952258	-1.1514	-0.778364
Plat	d	0.4929	2.04146	3.96098	3.52508	0.979686	1.19046	0.170138
Nod2	d	0	1.06139	3.30042	3.53814	1.21609	0.786702	0.119838
Ankrd33b	d	0.529755	0.687312	3.49262	4.41715	1.02305	2.21417	0.256282
Cyth3	d	-0.0859546	1.03589	2.38223	1.69345	-1.37655	-0.439504	-1.50279
Fgfr3	d	1.15927	1.09914	5.00408	3.61423	1.52152	0.714678	0.537238
Rhpn2	d	0.147955	0	3.48626	1.76971	0.414795	0.214058	0.0901124
Trpv4	d	0.915273	2.02959	4.25142	3.55913	1.07863	0.667947	0.18911
Atp13a3	d	1.88934	0.98245	2.12831	1.40391	-2.06923	-1.88394	-2.61501
Lama3	d	-0.404798	0.0683312	4.09139	3.46806	0.753352	0.508777	-0.629638
Slc6a6	d	2.4252	-1.38028	1.97447	2.54978	-1.51781	-0.89702	-3.43763
Car7	d	0.275175	1.15159	3.9172	4.44858	0.867047	1.75687	0.415778
Fbln5	d	3.86218	-2.73734	3.39909	2.05241	-3.23644	-2.90959	-2.29145
Plcg2	d	0.437281	1.41245	5.39395	2.46689	0.500813	0.918052	0.315044
Nebl	d	0.594179	0.287703	5.16986	3.48802	1.28363	0.290034	0.199728
Gja4	d	0.0692578	6.10797	5.66893	4.80707	0.907014	1.07384	0.055626
Aif1l	d	0	1.27659	4.59515	2.87701	0.587257	0	0.0106112
Pcsk5	d	1.48693	1.92134	5.73961	4.37739	0.852412	0.427308	0.380608
Sema3g	d	-0.379034	1.36393	7.14149	4.93229	1.32642	2.2855	-0.525206
Hey1	d	0.852331	1.36953	3.95675	2.47645	1.01921	0.30558	0.0372444
Tgfb2	d	0.46585	2.63484	2.71474	2.61803	0.776463	0.331154	0.21561
Egfl8	d	0.320207	1.65168	2.45641	1.89293	0.201443	0	0.133911
Cecr2	d	0.261684	0.955225	3.39498	1.90261	0.926823	1.12491	0.354733
Sh3bp4	d	-0.672415	-1.25161	2.42171	2.99555	0.759255	-0.786312	-0.44929
Ptplad2	d	0.327495	0.154255	2.89861	1.87494	1.72304	0.232028	0.117314
Pitpnm3	d	0	1.45855	2.27088	1.39332	0.661942	0.242363	0.0274929
Gpr30	d	0.58054	1.86398	4.94832	0.340445	0.127348	0.0358332	0.145123
Igf2	d	1.72902	5.63831	7.17632	0.703026	1.33417	0.137887	0.290497
Scara3	d	4.53071	2.96375	4.42351	0.870931	0.760081	0.220419	0.188436
Htra1	d	3.22208	6.20673	5.37452	1.35243	1.10354	0.258469	0.454437
Atp2b2	d	0.127407	0.14723	3.21631	0.624256	0.263485	0.0752896	0.202073
Tppp3	d	0	3.53886	5.31843	1.37282	2.8887	0.0441754	0.0345311
Jag1	d	-1.02901	1.97879	2.42338	-0.672163	-2.45696	-2.73325	-0.965204
Apba1	d	0.260237	0	3.60282	0.904999	1.08348	0.89781	0.690917
Fam107a	d	0.173559	0.716002	2.76063	1.09667	0.711455	0.12089	0.0675397
F2rl1	d	0.0651623	0.899194	1.68767	0.0573248	0	0	0.0285855
Kcnn3	d	0.36323	1.62707	3.07729	0.780013	1.06243	0.657435	0.619418
Myrip	d	0.23541	0	3.06778	0.895905	0.557437	0	0.125536
Gcnt1	d	0	0	1.34374	0.0140483	0.0206243	0.212179	0.00901638
Kcne3	d	0	0.734651	1.77176	0.175783	0.0274649	0.292746	0.169666
Megf6	d	0.103693	0.154255	1.81143	0.31958	0.214005	0.325874	0.473
Samd12	d	0.135713	0.450848	2.60077	1.30317	0.919774	0.415732	0.264219
Dkk2	d	0	0	1.5417	0.804115	0.0232031	0	0
Cmklr1	d	0	0.824964	2.07833	0.741377	0.0550539	0.532709	0.0180654
Gata6	d	0	0	1.19901	0	0.0912936	0.1042	0
Cytl1	d	0.154853	1.37716	3.68104	0.574535	0.455724	0	0.0119675
Gkn3	d	0	1.0733	4.41331	0.147095	0.414737	0	0.00767977
Pthlh	d	0	0	1.84624	0.151861	0.0687654	0	0
Adra2c	d	0	0	1.84468	0.0863341	0.11777	0.0862133	0.117769
Klk10	d	0	0	1.05007	0.0133515	0	0	0.0203992
Plek2	d	0	0.828397	1.65046	0.301775	0.0489362	0.0423539	0
Emp2	d	4.48955	1.46666	4.8196	2.3363	1.76618	0.334162	0.177178
Tmem158	d	0.142487	0	2.06855	0.829778	0.708913	0.725905	0.572579
4933423P22Rik	d	0.362276	0	1.52825	0.217818	0.0198293	0.119062	0.0212942
Klk11	d	0	0	0.825531	0.0136043	0.210828	0	0.00873384
Irf6	d	0	0	1.19208	0.0302018	0.0232031	0	0.0162621
Eln	d	-0.244785	1.53241	3.99553	2.47032	0.942725	0.416697	0.204035
Anpep	d	0.415348	2.01109	0.972579	0.414471	0.107013	0	0.0757799
Trpm6	d	0.25402	0	1.26713	0.0788128	0	0	0.0111151
Vwf	e	-0.158879	0.965896	3.5191	0.84622	2.21468	0.675315	-0.364621
ENSMUSG00000104079	e	0	0	2.5151	0.820757	1.48448	0.090777	0
ENSMUSG00000103738	e	0	0.189742	2.52816	0.903251	1.09258	0.18029	0
mt-Rnr2	e	-0.591983	0.597449	0.570258	0.486766	0.350291	-0.224085	-0.342331
4930452L02Rik	e	0	0.416933	1.06863	0.711409	0.987767	0.180529	0
Spata13	e	-0.132905	-0.657694	3.25142	3.3652	1.35041	2.30194	-0.505948
Smad7	e	-0.801789	0.237491	1.00554	1.87809	-0.859728	0.309918	-2.06132
Ptprm	e	-2.57932	-3.74256	1.29144	0.519011	-0.470165	-0.714492	-2.4563
Entpd1	e	-3.25989	0.152548	1.40738	0.778176	-1.4662	-0.666383	-3.08004
P2ry2	e	0.360113	0.259111	4.0495	5.08387	3.16132	0.0441754	0.039889
Tm4sf1	e	-2.34943	-2.01444	1.31927	0.979843	-0.586236	-1.42426	-2.56836
Heg1	e	-2.00044	-3.3643	1.19856	0.935337	-0.906067	-0.259947	-1.83483
Epas1	e	-0.4621	0.694607	1.32304	0.825267	-0.329011	-0.720942	-1.14322
Nos3	e	-2.37609	-3.60256	1.9378	1.34507	-0.855278	-1.29981	-2.57153
Gm8995	e	0.276769	1.36418	5.24238	4.88326	2.57491	1.65218	0.26279
Sema7a	e	0.501857	-0.0146081	3.97893	5.04395	3.10289	2.25273	-1.31926
Ceacam1	e	-0.556783	0.888233	4.52299	3.65971	2.9057	1.76378	-0.403709
Pkn3	e	-2.07385	-1.5615	2.5303	1.95575	1.29335	-0.0835358	-2.36592
Efnb2	e	-2.26636	0.640047	2.44023	2.44943	0.589401	0.689395	-2.96929
Slc9a3r2	e	-2.25297	-3.17644	1.12366	1.17158	-0.00420392	-0.953179	-2.64836
Fxyd5	e	-4.3397	-3.07106	1.66746	1.35344	-1.07051	-0.219819	-4.23172
Plcb1	e	-0.508816	-0.782661	2.73797	4.40144	1.49476	2.46835	-1.89884
Jag2	e	-1.40234	-0.149545	4.38374	3.66429	2.58745	0.704909	-1.182
Ly6a	e	-4.77391	-5.32497	1.35093	1.01331	0.433278	-0.0737321	-3.68056
Ltbp4	e	-3.73937	-3.68975	2.24676	1.29525	0.49497	-1.18172	-4.7602
Ly6c1	e	-4.4104	-5.25333	1.20179	1.10074	0.854135	0.127196	-5.79401
Fbln2	e	-3.7886	-1.81806	4.71552	3.16881	1.21048	-1.22066	-4.37889
Podxl	e	-5.79193	-3.38879	2.49139	1.6581	0.783323	-1.72357	-5.83981
Pecam1	e	-3.27546	-6.36402	0.893466	0.277547	-0.00492726	0.125008	-1.27794
Adam15	e	-2.39481	-3.39118	0.928051	0.486088	-1.01518	-0.405272	-2.41989
Col18a1	e	0.882365	5.01034	3.30442	4.31653	0.0772882	2.22925	-0.902757
Gm9581	e	0.903398	0.880118	3.81415	3.41049	2.97996	1.00412	0.710398
Pdgfd	e	-0.0988313	2.13289	3.47194	3.21796	1.66828	0.267125	0.0468813
Epb4.1l4a	e	0.765251	1.2379	3.40775	2.56654	2.31535	0.389116	0.160066
Rnf125	e	2.06168	1.56015	3.47513	3.91206	2.66874	1.79101	0.299747
Unc13b	e	0.922784	0.183189	3.29786	2.77972	1.77854	0.474194	-0.398405
Rtn4	e	-1.17865	-1.5037	0.80394	1.71404	-1.23953	-0.74979	-1.86933
Palmd	e	-2.46147	-3.13111	0.510604	1.44712	-0.22704	-0.486031	-1.96757
Sox7	e	-2.282	-3.83059	1.24836	1.44413	-0.698901	-0.0867558	-1.91305
Nedd9	e	-1.21348	-1.17225	0.539011	2.13295	0.0254626	-0.225798	-2.12284
Akap2	e	-0.420775	-0.585971	1.41705	1.49393	1.08138	0.320436	-0.45028
Ptma	e	-0.651416	0.486392	1.02702	0.825563	-0.110875	-0.335344	-0.945648
Plec	e	-1.53832	1.47834	1.39817	1.11885	-1.03225	-0.12406	-1.70327
Myo1d	e	-0.256041	3.31173	2.90639	2.01495	1.75042	1.48188	-0.732242
Ly6c2	e	-0.622426	-0.234865	0.533386	0.436633	0.383927	-0.0162687	-0.755502
Prnp	e	1.01828	2.84143	3.9842	3.29574	3.61515	2.0203	0.292487
Gm2830	e	0.346058	3.1999	2.46208	1.16931	1.116	0.784896	0.221674
Tspan13	e	-3.35872	-2.80124	1.20509	0.4151	2.49942	-1.10093	-2.26876
Pls3	e	-1.90118	2.15346	1.08148	0.795731	0.165703	-1.28621	-2.43185
Cxcr7	e	0	2.64302	5.48494	2.21156	2.5138	1.53091	0.116656
Myadm	e	0.290744	2.39075	0.631395	1.014	1.23077	-1.39757	-3.14672
Tmem255b	e	0	2.51733	4.06348	2.82769	3.06111	0.803204	0.00809409
Cd97	e	-1.30216	0.361281	1.19199	2.01935	0.410878	1.06933	-2.77868
Tmtc1	e	0.486508	3.05278	2.43628	2.69156	2.66231	1.23777	-0.731799
Ptrf	e	-1.69276	1.95089	1.32642	0.238944	1.533	-2.27946	-2.17919
Myo1e	e	-0.838018	2.09539	2.85277	2.5183	1.45737	-0.104853	-1.44646
Sox13	e	-1.64434	1.19486	3.94285	3.27662	1.20065	1.14223	-1.1041
4930578C19Rik	e	0	0.784834	3.14223	4.05295	3.90794	2.20165	0.0575644
Pcdh1	e	-0.811081	1.4234	2.08579	3.10567	1.30459	0.858528	-1.54807
Mast4	e	-1.85778	1.12035	1.67721	1.68334	-0.216218	-0.160014	-2.83301
Syne2	e	-0.785847	2.59063	1.29819	0.394974	0.208181	-1.97239	-3.56992
Ebf1	e	2.21711	2.35192	1.18262	2.08343	-0.339115	-1.05036	-4.04183
Utrn	e	-1.91234	1.01823	1.3514	0.331065	0.102985	-0.444814	-2.14859
Akap13	e	-1.76076	-0.37817	1.05302	1.25617	-0.50725	-0.185528	-3.35533
Itpkb	e	-2.19965	-0.368056	0.165511	1.00251	0.829697	-0.210493	-3.04729
Sptbn1	e	-1.34334	-0.422771	0.639796	0.724257	0.773619	0.11315	-1.25334
Lims2	e	-1.27911	1.64107	3.17632	2.82086	4.07721	1.86204	-0.915915
Mgll	e	-4.28915	-1.67203	0.697095	1.1314	0.273579	-0.218267	-3.80782
Vim	e	-1.23189	1.47527	1.9945	1.5553	0.123382	-1.11132	-4.02538
Clic5	e	0.722621	0.539776	4.36935	4.30309	4.92218	0.766361	0.0586815
Cd200	e	-2.79959	-0.334242	0.406688	1.62859	1.16663	-0.448626	-3.97065
Kitl	e	2.37909	1.58944	0.852704	1.47728	1.5386	-2.26646	-4.68449
Ahnak	e	-0.799644	0.118661	0.774478	0.806773	0.581835	-0.534489	-2.52893
Cd34	e	-2.84529	-3.70656	2.05468	3.3471	2.69055	4.0973	-3.34596
Ptprg	e	-1.30202	-1.94257	1.10282	1.51929	0.574727	-1.85685	-3.95935
Syne1	e	-2.22369	2.47477	1.93684	2.01217	1.45341	-1.18851	-3.84263
Rasgrf2	e	-2.05487	-2.28131	3.12348	1.38681	1.53781	-1.46853	-3.56739
Crip1	e	-1.57439	4.70458	3.15988	1.45334	1.32763	-2.32602	-3.45604
Cav2	e	-3.81993	0.200658	1.10239	0.429975	1.02245	-1.08301	-3.73326
Cdh13	e	-1.21034	-1.05582	6.36232	4.18905	4.37707	0.117284	-1.70719
Bcam	e	-3.96705	2.93077	2.49487	0.682165	1.12738	-0.749825	-4.25347
S100a6	e	-1.53757	3.13425	3.13517	1.96891	2.59897	-1.89705	-3.02344
Sparcl1	e	-1.22621	9.32356	6.57774	4.10975	6.69674	1.76406	-1.68441
Jam2	e	-3.97644	-2.31896	1.61456	1.70686	1.88341	-0.498602	-5.00079
Cav1	e	-6.92809	0.399201	2.0757	0.679286	1.75273	-2.0067	-7.35545
Tspan2	e	0.614527	2.38045	4.31458	1.96446	5.27429	0.41095	0.60834
C1qtnf9	e	0	1.80805	3.3954	1.15912	4.76848	0.325174	0
Meox2	e	0.259996	2.58367	3.44481	1.04855	4.07222	0.0973977	0.0216567
Cep85l	e	-0.0415902	1.32074	2.79962	2.23912	2.22333	0.579021	-0.616194
Ehd4	e	0.357835	1.75977	3.12078	3.3028	1.59313	0.209561	-0.792296
Lmo7	e	4.09638	2.68315	4.06508	2.55752	3.89042	0.422161	0.278286
Capg	e	0.786222	1.66229	5.04589	2.89052	2.68245	1.43337	0.741337
Ecm2	e	1.70234	3.45158	3.57403	1.68665	2.94832	0.366609	0.18604
Cyb561	e	1.28768	0.858111	4.10601	2.25513	2.88637	1.91911	0.741816
S100a10	e	-1.70306	-3.5874	0.584673	0.8782	0.838142	-0.678404	-2.26669
Fstl1	e	5.56432	2.97656	3.10713	2.21061	1.17267	-0.686064	-1.57321
Pdlim1	e	-0.855684	0.53157	2.47657	0.724098	2.30221	-1.94775	-1.80069
ENSMUSG00000107211	e	0.503295	1.51744	2.64492	1.56471	3.09484	0.0949779	-0.250052
Stxbp6	e	1.89465	1.84326	0.153167	0.307889	2.24542	0	0
Col15a1	e	0.064924	0.0882405	0.253436	2.61489	3.2634	2.49629	0.105747
Piezo2	e	0.234066	0	0.036448	1.28675	0.669537	2.91146	0.183402
Rnd2	f	0.491685	4.62604	0.396115	0.759056	0.079433	0.679642	0.37947
Fgl2	f	1.03757	4.04212	0.278996	0.37739	0.239264	0.15987	0.124133
Ncs1	f	0.586012	3.26014	0	0.158248	0.108025	0.0800864	0.0481075
Adamtsl1	f	0.100072	4.75693	0.0434135	0.615779	0.255807	0.155618	0.0940157
Pde5a	f	3.42677	6.26475	0.508513	1.01405	1.06663	0.364225	0.617092
Pln	f	0	5.16219	0.914448	0.644118	0.506567	0.458286	0.1435
Bmpr1a	f	1.98348	4.46875	0.291289	0.68902	0.020689	0.373128	0.234036
Pip5k1b	f	0	3.04213	0.426772	0.0891153	0	0	0
Fmod	f	0.339113	3.91655	0.489335	0.530846	0.678558	0	0
Mlf1	f	0.146228	3.46852	0.0586423	0.262577	0.173157	0	0
Etnk2	f	0	3.82813	0.260412	0.48829	0.143967	0.161755	0
Kcnq4	f	0.12019	4.0147	0.0945158	0.07753	0.243485	0.484897	0.178929
Gdf15	f	0	5.12787	0.202381	0.358479	0.0333585	0.35978	0.0249147
Cacna2d1	f	0.525361	4.60656	0.104836	0.366767	0.247787	0	0.278745
Map2	f	0.0617345	3.50781	0.143951	0.442022	0.436433	0	0
Mustn1	f	0	8.07993	1.26901	0.992476	2.15503	0.0498168	0.0363957
Trpv2	f	1.194	5.29938	0.354536	0.519127	0.60262	0.322176	0.677186
Kcnab1	f	0.770054	4.51896	0.274745	0.688501	0.290168	0.102633	0.137616
Cpe	f	0.598579	6.61477	0.461742	1.41084	0.86594	0.333302	0.236537
Akap6	f	0.0910452	5.59147	0.971926	0.279497	0	0	0.00873384
Gm2301	f	0	3.28903	0.281372	0.252118	0.235845	0	0.0092438
Myl9	f	5.1887	10.7423	1.37798	1.48206	1.43313	0.527685	0.428797
Fgf1	f	1.0543	6.17536	0.0441159	0.513259	0.250397	0.530851	0.324928
Kcnt1	f	1.61506	5.29931	0.184429	0.271006	0.30509	0.452374	0.373231
Tbx2	f	1.53541	5.85001	0.14283	0.564502	0.509316	0.401389	0.514762
Mark1	f	3.21038	6.33524	0.144039	0.535672	0.210882	0.114896	0.310724
Ppp1r14a	f	0.104769	4.47327	0.380943	0.129009	0.248789	0	0.05388
Gucy1a3	f	1.57193	8.11296	1.26105	0.576149	0.242437	0.107004	0.0305068
Foxs1	f	0.310041	3.05108	0.0686492	0.0483056	0	0	0.00892662
Atp1b2	f	1.21702	7.22006	0.206133	0.770182	0.481185	0.606389	0.511949
Gucy1a2	f	0	4.27164	0.0417589	0.509986	0	0	0.0462131
Synpo2	f	2.44004	7.42619	0.153692	0.0737202	0.0893607	0.0845074	0.228712
Slc4a3	f	1.2347	6.30956	0.369348	0.416266	0.0735932	0.0727007	0.0703024
Tagln	f	0.898554	10.7296	0.958649	1.00278	0.564776	0.584261	0.444123
Mrvi1	f	0.914572	7.90817	0.226245	0.642612	0.686179	0.165608	0.296757
Rbpms2	f	0.277828	6.16321	0.253235	0.32502	0.592499	0.223265	0.356012
Pdlim3	f	0	5.79357	0.734587	0.238368	0.0378785	0	0.0210895
Tpm2	f	1.51949	10.033	1.01493	0.543137	0.828982	0.381689	0.0792542
Gucy1b3	f	0.183302	5.91563	0.397155	0.319228	0.443185	0.0442532	0.0226382
Scn4b	f	0.0795792	3.83244	0.134364	0.130706	0	0.0265221	0.114861
Cacna1c	f	2.51457	7.43797	0.600169	0.439691	0.722342	0.59992	0.490603
Cox4i2	f	0	4.47363	0.276862	0.258704	0.196286	0.0546175	0
Ebf2	f	1.06255	5.99854	0.197592	0.363638	0.381128	0.296816	0.222119
Rgs7bp	f	0.850665	5.04135	0.119234	0.119956	0.0333206	0.235902	0.03203
Hopx	f	0	3.73109	0.024363	0.0853697	0.194609	0	0
Rasl12	f	0.90625	6.49757	0.0972752	0.110087	0.0398729	0.0766787	0.0842096
Des	f	1.30766	8.57907	0.313909	0.658534	0.619921	0.885193	0.596293
Aspn	f	0.155238	7.02817	0.401298	0.580574	0.137427	0.0318578	0.0260693
Ntrk2	f	0.20992	6.78825	0.238654	0.283047	0.251278	0.184686	0.221598
Olfr558	f	0	5.32207	0.168199	0.0620887	0	0	0.0079015
Acta2	f	0.300778	12.0847	1.44406	0.758369	0.633823	0.313868	0.254849
Myh11	f	0.803721	10.8536	0.427772	0.593466	0.272559	0.579256	0.104375
Lmod1	f	0	6.54494	0.166693	0.175504	0	0.191815	0
Myom1	f	0.0732293	6.48672	0.0702704	0.242616	0.302024	0	0.102677
Slc38a11	f	0	5.13476	0.135338	0.204127	0	0	0
Crispld2	f	0.0795792	8.89719	0.233031	0.554004	0.0446418	0.154258	0.0514808
Ndufa4l2	f	0.528282	6.31594	0.0808798	0.350225	0.0333206	0	0
Cryab	f	0	6.35977	0.0949619	0.174221	0	0	0.00790905
Npy1r	f	0	6.47364	0.0543593	0.208102	0.0587203	0	0
Aoc3	f	0.119522	8.10587	0.114432	0.260896	0.0395044	0	0.0104743
Tuba1c	f	3.01261	6.07424	1.07523	1.53115	0.486002	0.296893	0.46214
Sgip1	f	0	3.5522	0.106383	0.491873	0.214681	0.378997	0.234766
Gsn	f	3.129	7.69266	1.3694	1.2656	1.20402	-0.237487	-0.669294
Lrig1	f	1.92191	5.13091	0.365933	0.593078	0.644699	0.998642	0.707601
Smarcd3	f	2.55755	4.96132	0.586357	0.34909	0.076401	0.337901	0.266725
Rcan2	f	2.17134	8.57605	0.221307	0.861544	0.353433	1.61455	2.0823
Prkg1	f	2.2947	5.60343	0.5069	0.874267	0.213941	0.641782	0.585945
Nfatc4	f	1.43586	4.36283	0.21892	0.302881	0.229255	0	0.284013
C1qtnf7	f	1.12998	4.01258	0.0338692	0.0702093	0.280742	0	0.00810176
Epb4.1l1	f	1.86364	5.79058	0.399477	0.577063	0.225442	0.0548228	0.359733
Pde1a	f	1.99271	5.05226	0.168324	0.361031	0.112012	0.0982472	0.152186
Higd1b	f	0	2.55819	0.024363	0.197687	0.131209	0	0
Ano1	f	0.146897	5.48096	0.144317	0.368528	0.0689853	0.0442532	0.0799262
Casq2	f	0.119522	6.39732	0.139979	0.366182	0.313144	0.22995	0.0290535
Cspg4	f	0	5.13015	0.144656	0.516895	0.109239	0.0451735	0.00986698
Vtn	f	0	3.47872	0.0723892	0.17184	0.0607855	0	0.0109312
Lin7a	f	0.617092	2.9995	0.104295	0.192841	0	0.0540364	0
Rgs5	f	0.491377	7.06214	0.477427	1.67428	1.44304	0.667872	0.0824523
Egflam	f	0	2.79904	0.078026	0.292663	0.0206243	0.230364	0.174151
Sobp	f	0.962072	2.58254	0.277654	0.298278	0.249532	0.225737	0.323039
Serpini1	f	0	4.8079	1.33195	0.604532	0.121129	0.343053	0.0156211
Slc6a9	f	0.588499	3.40888	0.122845	0.252526	0.0720206	0	0.184886
Etv1	f	0.696436	1.73559	0.0823242	0.377103	0.185304	0.168461	0.0315688
Gm5454	f	0.568189	1.43901	0.061943	0.283434	0.0570043	0.158226	0.0660212
Rasl11a	f	0	6.98812	1.00879	1.19038	0.358408	0.254991	0.0346951
Sod3	f	2.6104	7.38698	0.508104	0.321733	0.26655	0	0.69362
Ccdc3	f	0.424644	5.35282	0.779167	0.27121	0.327166	0.282176	0.184494
Mamdc2	f	0	4.56375	0.292316	0.253734	0.017902	0	0.00790905
Fam65b	f	0.139574	4.07704	0.119179	0.202109	0.278281	0.683546	0.255661
Adcy5	f	0.674515	5.23747	0.255324	0.309148	0.710111	0.835379	0.6339
Asb2	f	0.699627	4.53043	0.297021	0.328437	0.738494	0.576486	0.551013
Ndrg2	f	2.87912	7.15045	0.4847	0.289002	0.122213	0.0790926	0.214402
Col4a6	f	0	3.46627	0.00953635	0.157982	0.0325325	0	0.0626052
Ngf	f	1.3754	4.3398	0.12172	0.0620054	0.0587203	0.0581292	0
Irs2	f	2.01115	7.40704	0.937472	0.746964	0.310799	0.616034	0.173251
Kcne4	f	0.503543	4.74826	0.0885229	0.0649126	0	0	0.0311284
Spdya	f	0	2.74252	0.124041	0.0844044	0	0	0.0702681
Cnn1	f	0	4.71604	0.110139	0.0450243	0.0258894	0	0.0553069
Wnk2	f	0.233532	3.8669	0.167638	0.104354	0.298445	0.148368	0.306156
Gm13861	f	0.249749	3.54251	0.0706018	0.137108	0	0	0
Cacnb2	f	0.0732293	4.43522	0.191228	0.111129	0	0.25237	0.0581115
Grip2	f	0	5.31656	0.181996	0.386409	0.0274649	0.20757	0.0116541
Gm3470	f	0	3.35967	0.0472593	0.0726031	0.218022	0	0.0210945
Ctnna3	f	0.100072	4.51172	0.199481	0.176626	0.078669	0	0.0110616
Slc2a4	f	0.429604	5.89079	0.0524543	0.209313	0.0258894	0.0464316	0.0710077
Hspb2	f	0	3.82037	0.0517466	0.0185492	0	0	0
Xirp1	f	0.0624834	4.96122	0.150222	0.0180729	0.0963197	0.0939478	0.0675149
Parm1	f	0.0795792	5.73179	0.0331441	0	0.0390245	0.09407	0.0482421
Atp1a2	f	0.0732293	5.69784	0.151659	0.130891	0.0736874	0	0.0251917
Pde3a	f	0.762596	8.21752	0.316423	0.491592	0.330276	0.322991	0.17932
Nrip2	f	1.08381	8.82162	0.142274	0.312203	0.0365297	0.30774	0.0626049
Cap2	f	0	6.51295	0.0686492	0	0.0889985	0	0.0602637
Itga7	f	0	5.73304	0.0972752	0.121464	0.0319911	0	0.0109312
Tesc	f	0.0732293	4.98645	0.126248	0.133023	0	0.199765	0.0295039
Slc6a17	f	0.0732293	6.45145	0.123176	0.0872645	0.1677	0.042704	0.080836
Dgkb	f	0	6.25081	0.0743825	0.0652824	0	0.0548228	0.00820816
Cacna1h	f	0.369576	4.76633	0.352738	0.321249	0.978669	0.760126	0.747797
Sox5	f	0.922854	3.37876	0.0769618	0.526561	0.101125	0.0420024	0.103674
P2rx1	f	0	3.89723	0.0762869	0.371757	0.30682	0.324048	0.0185357
Usp2	f	0.119522	4.93772	0.934244	0.900063	0.192091	0.0982895	0.205727
Tgfb3	f	3.17171	5.51397	0.180928	0.376516	0.0395044	0.252891	0.309267
Dmd	f	0.881801	7.90153	2.24948	0.648404	1.18844	0.867844	0.822044
Gm13889	f	1.28922	7.31976	0.329077	1.3119	0.211701	2.06145	1.74583
Jph2	f	-0.457077	3.16786	-0.196254	-0.125386	0.0115158	0.059329	-0.115231
Dmpk	f	3.33399	7.15551	0.276721	0.607698	0.195177	0.711553	1.92497
Rrad	f	0.755803	7.99868	1.24945	2.49642	0.335523	0.551112	0.358161
Pi15	f	2.1583	4.09739	0.0529108	0.217096	0	0	0.0490098
RP23-202I21.2	f	0.58928	2.48913	0.0135105	0.178548	0	0	0
Ildr2	f	1.42423	2.13015	0.0622313	0.273766	0.168805	0.0800864	0.0758393
Dzip1l	f	0.847249	2.89178	0.08996	0.359438	0.322353	0.248889	0.374113
Mutyh	f	0.488999	2.5299	0.0324128	0.126938	0.0923571	0.180742	0.154804
Itga8	f	1.88841	4.20126	0.168497	0.342169	0.017902	0.257129	0.515883
Cd63	g	2.48216	0.632623	-2.00398	-1.38077	-3.58908	-0.366177	0.45422
Cd63-ps	g	2.57821	0.2818	-1.88399	-1.37547	-3.46782	-0.175104	0.580707
Mylk	g	1.87126	4.45722	-1.67313	-2.33767	-3.04678	-1.78098	1.29973
Prelp	g	6.50212	2.79442	-0.885701	-0.0385977	-0.336684	-0.0803044	4.86862
Rarres2	g	5.76701	5.47451	0.0958461	0.370227	0.0739173	0.383261	3.04841
Bgn	g	2.72932	-1.1042	-3.22262	-2.44639	-5.16419	-1.39595	0.871432
Axl	g	4.53353	7.00022	0.414981	0.930721	0.0318123	0.72524	3.91551
Rtn4rl1	g	3.87066	4.29051	0.0934855	0.372099	0.0581435	0.153028	2.68525
Lbh	g	2.8959	5.09945	-0.451644	0.350407	-0.535786	1.51231	2.46539
Map1b	g	2.0568	3.13655	-2.35165	-0.430092	-1.71697	-0.18561	2.05718
Tmem176a	g	2.41228	-3.2043	-3.29536	-1.72046	-4.15391	-1.21138	0.943932
Tgfbr3	g	1.86095	-2.24861	-3.25296	-1.17978	-2.28942	-0.114726	1.10882
Vstm4	g	3.40028	2.18274	0.169929	0.661367	0.143517	0.92119	3.70711
Smap2	g	0.570128	-1.38029	-2.02664	-0.693161	-2.36351	-0.462037	1.45148
Cd302	g	6.53493	0	0.292659	1.37217	0.330898	0.872753	4.06289
Cotl1	g	3.06249	0.471707	0.30127	2.03667	0.187045	3.49448	4.3706
Dapk2	g	3.00618	-0.901113	-0.88128	-0.0162916	-0.155329	3.40468	3.37994
Dock8	g	2.65743	1.9651	-1.50512	-0.297777	-1.63862	1.25575	2.93928
Nid1	g	0.90811	-4.66864	-3.38719	-1.2116	-3.34895	-0.0633689	1.18654
Slc7a2	g	2.65738	3.41355	0.141373	0.439954	0.242363	1.62084	4.24214
Ly96	g	1.70514	0.486987	0.489619	1.05286	0.0768771	2.06781	3.86989
Ap2s1	g	1.13007	-3.02222	-2.74619	-2.30217	-1.83354	-0.667129	1.35486
Xbp1	g	0.555754	-2.74332	-3.60703	-1.81215	-4.64699	-0.231701	1.34147
Nr2f2	g	0.00749032	1.47826	-3.64981	-1.56933	-2.24369	-0.358636	2.03205
Igfbp4	g	2.19065	-0.869155	-2.66332	-2.85219	-6.49197	0.0608055	1.14101
Trf	g	4.32275	0	0.108105	0.491669	0.0875319	1.16491	3.02705
C1qtnf1	g	1.45568	0.541864	-2.22879	-1.42577	-3.09156	-0.585704	2.87009
Rcn3	g	1.89036	-2.50448	-3.49966	-2.65327	-4.57623	-0.0118845	1.34567
Ctsl	g	1.67054	-1.80063	-4.07765	-1.62817	-2.35898	0.125118	2.63526
Rnase4	g	2.42611	-2.83899	-2.61351	-1.88631	-3.77633	0.238979	3.10544
Stab1	g	0.100001	-6.381	-4.24478	-2.50461	-4.29621	0.793148	1.95568
Irf8	g	3.65258	0.071247	-1.06915	0.47299	-0.473826	1.2359	4.5888
Mafb	g	1.67598	-2.31784	-3.66644	-1.20131	-3.42023	1.55762	3.8959
Kcnj8	g	4.72997	0.888907	0.0953426	0.716779	0.0937387	3.7364	6.26713
Chst2	g	3.63604	-1.35954	-1.42031	-0.254086	-1.10812	2.71475	5.278
Abcc9	g	4.93025	-0.326449	-2.08072	-0.973313	-1.90687	4.03219	6.62218
Serpina3f	g	4.84947	0.162368	0.0467132	0.281514	0.11113	1.73295	3.90637
Man2a1	g	0.437352	-2.95539	-2.80122	-1.57016	-2.74699	-0.0453037	1.0067
Slc29a1	g	1.79406	-1.759	-2.9165	-2.09905	-4.03012	-0.393462	0.803517
Tns3	g	5.7636	0.736809	-1.44304	0.5208	-1.24774	0.777116	2.61353
Armcx4	g	4.06625	0.111459	0.184351	1.08758	0.300095	1.58744	3.73367
Arrb1	g	0.327031	-1.57432	-2.50775	-1.55318	-2.8551	0.577986	1.26325
Ugcg	g	0.486742	-1.31471	-1.90114	-1.48595	-3.28773	-1.33302	0.936323
Fscn1	g	0.878641	-2.72466	-2.45626	-1.171	0.0250233	1.43781	1.32562
Mgat4b	g	0.734241	-3.31668	-3.66711	-0.726558	-2.99862	0.404976	1.08437
Tcn2	g	0.313638	-4.84244	-4.58759	-1.85671	-4.21056	0.334935	1.36964
Cmtm3	g	0.156873	-4.22199	-3.66304	-1.1273	-2.55456	1.7152	2.03805
Pde2a	g	0.431915	-6.08868	-5.98396	-1.21192	-2.47959	0.601319	1.19471
Maf	g	2.74689	-0.892202	-1.92608	-0.105419	-1.62997	0.747542	2.78183
Lgmn	g	0.433497	-4.33544	-4.31044	-2.14461	-5.67133	0.223414	1.65982
Sepp1	g	1.45857	-4.97966	-2.95277	-1.3316	-2.53582	0.399087	2.11996
Lrg1	g	-0.518143	-7.67339	-6.73142	-1.05424	-6.27726	-0.787165	1.86341
Fam167b	g	2.95413	-1.0855	-1.06859	0.903806	-1.03588	3.79502	5.09035
Tfpi	g	1.75795	-5.87955	-6.05927	-2.41796	-5.59127	0.742402	3.43927
Apoe	g	2.31882	-6.622	-5.4819	-2.40901	-3.20406	0.121867	1.64199
Srgap1	g	0.835008	-1.48106	-1.16529	0.166667	-1.23932	1.79283	2.87669
Fcgrt	g	0.545356	-3.6772	-4.0341	-1.52062	-3.36778	0.0903986	0.944743
Exoc3l2	g	0.770007	-3.59701	-3.13694	0.364839	-2.53964	0.289664	1.55465
Fam124a	g	3.1326	1.06956	-0.768009	0.248615	-0.941479	2.2977	3.07964
Tmem176b	g	2.46048	-4.24718	-2.91946	-1.7502	-4.01039	-0.86371	0.796286
Angptl4	g	5.59567	-0.179395	-0.757927	1.5962	-0.40432	2.28736	3.88684
Mtss1l	g	3.81627	1.95778	-0.892572	0.210067	-0.176278	2.40847	3.27237
Meis2	g	2.02827	1.96809	0.0544345	0.244864	0	0.2632	1.53123
Vegfb	g	2.26954	2.08006	0.12019	0.506659	0.235021	0.736541	2.23247
Aplnr	g	0.872298	0	0.154387	2.22032	3.30622	5.7215	2.22726
Cdk18	g	2.02923	0.657609	0.0417589	0.73027	0.0786361	0.666454	3.35424
Tgfbi	g	4.16487	0.328787	0.167099	0.438219	0.272806	1.99649	3.923
Ltc4s	g	2.26347	0	0.125808	0.640086	0.0277058	2.08898	3.04056
Slc16a9	g	2.81565	0.657639	0.177442	0.2395	0.493079	0.497854	3.28391
Wdr17	g	1.60137	0	0.00814551	0.174942	0	0.793434	2.23808
Epor	g	2.58675	0.162368	0.154628	0.295918	0.460132	2.32614	4.04326
Slc39a8	g	2.79326	0.118753	0.185608	0.756326	0.212144	1.6389	3.80691
1810011H11Rik	g	2.43159	0.246402	0.074334	0.102951	0.157306	0.581898	3.42359
Zfp521	g	1.98553	1.61603	-1.88515	-0.506755	-1.08097	0.665403	3.23024
Sult1a1	g	0.602912	-2.87772	-3.78758	-3.8872	-0.803608	-1.03908	1.64076
Thrsp	g	2.12085	-3.70383	-3.11427	-1.89049	-1.28816	0.362751	2.64047
Gm10800	g	1.26596	-0.959067	-1.66895	-1.3302	-0.200555	-0.619865	2.75622
Serpina3g	g	5.2201	0.118753	0.086273	0.803558	0.118838	2.03497	5.14192
Ralgapa2	g	0.415495	0.366504	-3.46578	-2.18129	-3.70026	-0.119207	1.53638
Crygn	g	1.241	0	0.0173951	0.0412682	0	0.747608	3.43018
Gpr160	g	3.09597	0	0.361333	1.50531	0.195021	4.08465	5.64454
Snx8	g	3.7137	0.299953	0.439468	0.935575	0.265779	3.10995	4.68319
Glis3	g	3.04749	0.162368	0.0752381	0.140495	0.131184	0.700143	3.46492
Adh6b	g	3.44351	0	0	0.23932	0.0570073	1.41248	4.7044
Hivep3	g	2.09881	-0.879443	-0.561947	0.120244	-0.718079	1.05582	4.02459
Gm16270	g	1.57004	0	0	0.103065	0	0.622635	3.67966
Myo7a	g	2.15057	-1.07582	-1.55468	-0.392674	0.354347	2.82023	4.05449
Dclk1	g	4.78487	0	0.0320722	0.119531	0.196576	0.337762	4.56993
Ston2	g	1.70985	0	0.0340289	0.0969772	0.323517	0.291668	4.97919
Tmem106a	g	3.39645	-1.31703	-0.646017	0.192982	-1.07793	2.42299	4.43243
Ap1b1	g	2.56389	-0.791652	-1.97716	-2.24331	-1.94478	-0.589145	3.13879
Mmrn1	g	3.50798	0.133448	0.12501	0.27191	0.214259	1.07758	4.8477
Flt4	g	-0.702096	-6.0734	-3.49994	-2.27506	-3.90868	-0.0983992	2.43277
Cxadr	g	4.26821	0.33474	0.291675	0.64564	0.247745	0.904065	5.52783
Gpr97	g	2.80367	-1.30218	-1.28495	0.156845	-1.22542	2.38648	4.72868
Col6a3	g	3.55842	4.07979	-0.964478	-0.729233	-0.74442	0.781069	4.98593
Gm1673	g	2.24297	0.154255	0	0.410972	0.315301	2.84264	4.20388
Cyp4b1	g	1.0217	-5.41886	-4.76991	-3.67618	-3.35436	-1.0324	2.78309
Rgs4	g	5.64661	6.50902	0.158085	0.468914	0.27078	1.14262	7.52714
Sema3a	g	3.5882	0.23616	0.00814551	0.286795	0.0594522	0.305207	5.67156
Clca1	g	5.17643	0.162368	0.574475	0.989857	0.375495	1.89447	6.59386
Sirpa	g	4.07472	0.394054	0.359913	0.464736	0.186675	2.20462	6.55885
Adamts5	g	5.89527	1.95792	0.0805616	0.774579	0.252043	1.9304	7.47844
Ubd	g	4.59666	0	0.0183162	0.181308	0.0255513	1.60255	6.07508
Dnase1l3	g	2.2299	-1.93578	-3.57117	-3.22571	-1.82808	0.229773	3.34296
Aldob	g	4.69556	0.111459	0.0175616	0.0427316	0.0904447	0.414232	7.29524
Gpr182	g	3.54587	-1.3714	-1.49387	-0.714646	-0.874052	4.04898	6.05296
F8	g	2.77426	-2.87114	-2.69133	-1.6155	-2.84906	2.16849	4.78359
Lipg	g	5.03604	0	0.0200063	0.23971	0.166929	2.1773	7.10299
Mrc1	g	4.37334	-1.0162	-0.966227	-0.107879	-0.904152	3.52435	6.68657
Stab2	g	5.84354	-1.00072	-1.63701	-1.49623	-1.70932	3.89883	8.83952
Nrcam	g	2.4986	0	0.072806	0.567382	0.0390245	2.65366	3.73904
Nat8l	g	1.6327	1.19552	0.0381067	0.0405376	0.0600871	1.50712	2.85503
Cdkl1	g	2.35875	0	0	0.0788666	0	0.223481	3.07749
Tmem37	g	4.72514	0.369536	0.117027	0.527633	0.295554	0.940706	3.61173
Ccdc69	g	1.7054	0.154255	0.112733	0.0165685	0.305201	0.191053	2.76521
Ptges	g	3.28589	0.118753	0.0292511	0.338945	0.138453	0.797412	2.67863
Tkt	g	1.16152	-0.682822	-0.911908	-0.76601	-1.54642	-0.528718	2.30993
Cfd	g	2.82989	0	0.03717	0.103843	0.0719813	0.0982472	2.62127
Afap1l2	g	1.06213	-0.41842	-0.292012	-1.89642	-3.72507	-3.07487	1.64022
Tmem132e	g	1.92459	0	0.0471566	0.105599	0.136315	0.420503	2.9401
Cadm3	g	1.54395	0.488821	0.131823	1.99526	0.687662	1.64042	4.71219
Il6st	g	0.497936	-3.39794	-1.3098	-0.755593	-3.65779	-0.790683	1.53405
Il13ra2	g	1.60111	0	0	0.115617	0.081857	1.17135	3.65166
Bend4	g	2.72508	0	0.0926486	1.12949	0.306418	3.00747	4.23528
Aebp1	g	2.14351	-0.68956	-0.923315	0.13671	-0.993288	2.23301	3.33279
Ctnnal1	g	3.74555	0.578721	0.603353	1.35771	0.255907	2.40268	4.6052
Cd55	g	3.54924	0	0.645801	1.09748	0.27844	0.990741	5.13461
Darc	g	6.09991	0.570802	0.0740386	1.09891	0.436656	1.82287	7.38181
Vcam1	g	4.62984	-4.00313	-3.13181	-2.96155	-3.75611	-0.107338	4.52599
Gpr126	g	3.209	1.4518	0.0809232	0.192616	0.0974913	1.16533	6.00842
Sele	g	6.26199	0.259111	0.101814	0.90822	0.207205	1.29638	7.45761
Selp	g	4.23331	-0.899788	-0.872242	0.31926	-0.86354	2.00272	5.87253
Gpm6a	g	5.67662	0	0.146535	0.894638	0.198758	3.35021	7.33984
Bok	g	1.7957	-1.37842	-2.40378	-0.552313	-0.703102	1.51263	2.97012
C5ar2	g	2.31097	0	0.0447708	0.204173	0.101047	1.10449	2.83805
Fblim1	g	1.78137	0.267917	0.216691	0.190785	-0.772286	2.19774	3.74955
Ptger2	g	1.53996	0.552837	0.0246916	0.0148929	0.0365297	0	2.79193
ENSMUSG00000106633	g	0.518786	0	0	0.0215416	0	0	1.10065
Mpp1	g	1.78982	0.841481	-0.0532318	0.400494	-0.202233	0.981522	3.12087
Actn1	g	1.17642	2.15235	-1.80478	-0.874899	-1.71548	-1.48768	1.26293
Adh1	g	5.42587	0.99551	0.399357	0.307447	2.86372	0.733877	3.60808
Gpr88	g	4.262	0.801996	0.164222	0.09067	0.317923	0.531965	1.78362

## Sheet: Endothelial ICGS groups
Gene Symbol	Row ID	Doublets	Pericytes	AEC-like	Arterial	Transition	SEC-like
Gnai1	a	4.49468	0.22719	0.348282	0.331931	0.410323	0.476861
Gpr153	a	4.26444	0.542118	0.326931	0.210317	0.806929	0.33485
Csmd1	a	5.43036	1.4603	0.0834179	0.205045	0.0931617	0.346841
Chl1	a	3.39557	0	0.0789652	0.0232031	0.0669547	0.0206167
Cldn10	a	4.31775	0	0.0980558	0	0.0904507	0.24433
Efemp1	a	4.62421	0	0.183709	0.0593875	0	0.0244186
Ptprd	a	6.7593	0.216366	-0.165511	0.148084	0.3639	0.391583
Adcy2	a	5.49394	0.353955	0.232579	0.31796	0.242402	0.459485
Maob	a	3.44183	0	0.141701	0.0412095	0.0573285	0.163843
Gpm6b	a	5.38977	0	0.18502	0.017902	0.0540364	0.483196
Kcnip3	a	4.44074	0	0.0467322	0.0580888	0	0.236932
Tnfrsf19	a	5.79255	0.147652	0.0718342	0.0718284	0.0464316	0.295754
Serpina3c	a	4.48568	0	0.038829	0	0	0.101144
Plekhh2	a	5.07881	0.49288	0.187065	0.0880825	0.0669547	0.175464
Ccrl1	a	7.33157	0	0.178619	0.233093	0.288771	0.365771
Pappa	a	7.32428	0.309598	0.324332	0.403213	0.186025	0.556754
Slc26a7	a	6.53166	0	0.116024	0.0462253	0	0.327927
G0s2	a	3.34404	0	0.142794	0	0.0451735	0.131547
Podn	a	4.03216	0.359793	0.147209	0.443214	0.21652	0.361023
Epb4.1l4b	a	4.14668	0	0.131945	0.278451	0.132639	0.314644
C2	a	3.80509	0.984863	0.150236	0.390959	0.25494	0.348063
Col5a3	a	4.03314	0	0.264063	0.268395	0.272391	0.518677
Rspo3	a	2.46161	0	0.10919	0.0981216	0.0448615	0.111656
Mrc2	a	3.29802	0.388169	0.164057	0.0232031	0.0577252	0.0978093
Negr1	a	2.94587	0.162368	0.0195904	0	0	0.133092
Srpx	a	3.28079	0.111459	0.0669177	0.184104	0.145508	0.239797
Apod	a	3.09089	0	0.271289	0.0949753	0.178629	0.314569
Cfh	a	7.35881	1.10206	0.520788	0.198529	0.117799	0.598364
C4b	a	7.69906	1.26333	0.388136	0.154177	0.130875	0.685602
Hp	a	9.40857	0.381137	0.116012	0.127113	-0.174497	0.784681
Tnc	a	8.86302	1.19172	0.815735	0.414307	0.211881	0.696129
Chrdl1	a	8.03132	0	0.391852	0.122018	0.0346906	0.589512
Cdh11	a	7.94589	0.446639	0.63844	0.284194	0.0785372	0.608701
Cxcl14	a	7.58559	0	0.371858	0.280884	0.20261	0.695981
Agt	a	7.32301	0.281122	0.294056	0.151174	0.166069	0.474589
Fgf7	a	4.3586	0.118753	0.152971	0.0596831	0	0.153275
Ogn	a	6.56693	2.36419	0.303	0.0965902	0.0997277	0.405269
Fgfr2	a	7.40862	0.287703	0.571014	0.377629	0.39209	0.580379
Grem1	a	5.54545	0	0.234893	0.0732065	0	0.4648
Gpx3	a	9.66771	-0.454311	0.683335	0.103066	-0.61221	1.11559
Pdgfra	a	6.14026	0.0882405	0.460951	0.269817	0.189363	0.291964
Mdk	a	4.19652	0	0.143636	0.255323	0.232845	0.290143
Islr	a	7.71618	2.72372	0.527522	0.177044	0	0.550634
Plxdc2	a	7.21705	1.15385	0.51995	0.163942	0.042704	0.5008
Epdr1	a	6.74645	1.10553	0.352577	0.0385263	0.0346906	0.338759
H2-Q10	a	5.35464	0.133448	0.454754	0.20299	0.473702	0.56079
Ccbe1	a	3.75562	0	0.0487197	0.100226	0.0506677	0.270958
Esm1	a	7.74647	0.337394	0.812731	0.709507	0.0939073	0.590072
Ms4a4d	a	4.94106	0	0.20091	0.236511	0.0265221	0.0947268
ENSMUSG00000103441	a	2.9242	0	0.0960144	0.017902	0.0358332	0.289378
Lepr	a	9.01841	-0.325606	0.711671	0.18504	-0.446519	1.83282
Shox2	a	2.9458	1.53134	0.215648	0.269296	0.146401	0.377814
Cp	a	8.27626	1.10968	3.2308	0.781219	1.13975	0.95568
Lox	a	5.35867	1.64175	1.64762	0.0333206	0	0.226588
Mgp	a	6.60828	3.03679	3.06316	0.237565	-0.244818	1.1505
Angptl1	a	2.87546	0	0.116246	0.103526	0	0.0594894
Fbln1	a	3.38239	0.118753	0.153765	0	0.0346906	0.0154237
Cpxm1	a	4.4723	0	0.112256	0.129676	0	0.331132
Runx2	a	4.30027	0.450071	0.288278	0.361744	0.790563	0.314205
Cdh2	a	5.49931	0.727518	0.111856	0.0866712	0.0265221	0.627231
Egfr	a	6.00276	1.98494	0.437659	0.41398	0.584982	0.501916
Igsf3	a	5.94039	0.133448	0.666503	0.1562	0.0858801	0.365819
Wisp2	a	5.41812	0	0.155248	0.208413	0.0996824	0.500874
Cldn1	a	3.6584	0.118753	0	0	0.042704	0
Podnl1	a	5.46869	0	0.187682	0.331779	0.0519453	0.47663
Fhl2	a	5.60464	0.246402	0.243901	0.0385263	0.0487338	0.138664
C3	a	5.44772	0.273008	0.279797	0.449603	0.198386	0.481753
Enpp1	a	4.60676	0	0.213232	0.0190643	0	0.284621
Gpx8	a	6.11439	2.43263	0.350367	0.092747	0.0933831	0.202502
Abca8a	a	4.79591	0	0.150673	0.0446653	0	0.00859536
Hmgcll1	a	3.67457	0	0.01587	0.0869121	0	0.0204099
Scara5	a	4.36752	0	0.167258	0.179096	0.0442532	0.160721
Ltbp2	a	5.57982	0.154255	0.179226	0.41907	0.0333095	0.0899313
Abi3bp	a	5.95623	0	0.40999	0.350612	0.215311	0.290451
Smoc1	a	5.25574	0.118753	0.0487356	0.226315	0.242135	0.349559
Spp1	a	7.21743	0.0882405	0.748806	0.261918	0.0752559	0.695303
Ibsp	a	9.83954	0.620874	0.511128	0.541864	0.616438	1.51182
P2rx2	a	4.66689	0	0.013479	0	0	0.0601078
Cyp1b1	a	7.94744	0.154255	0.437838	0.405085	0.350281	0.405173
Loxl1	a	6.09621	1.75951	0.192073	0.228485	0.0861306	0.382705
Mme	a	6.47306	0.592297	0.162859	0.269473	0.0949209	0.562633
Sfrp4	a	8.35366	0.118753	0.692632	0.365509	0.114004	0.680108
Adipoq	a	8.41813	0.189742	0.340256	0.108003	0.335843	0.682093
Kng1	a	5.90218	0	0.0672259	0.15046	0	0.225573
Gdpd2	a	8.52613	0.118753	0.332216	0.343051	0.108787	0.742827
Svep1	a	7.05903	0.281122	0.153565	0.352381	0.242904	0.302414
Dpep1	a	8.11867	0.240547	0.191082	0.233464	0	0.478099
Kng2	a	5.91208	0.118753	0.118025	0.0368879	0.0464316	0.227785
Ddr2	a	6.6936	4.42143	0.84768	0.621579	0.280407	0.672944
Susd2	a	5.48139	3.78327	0.178618	0	0.504362	0.288004
Clmp	a	5.26043	0.154255	0.389668	0.257107	0.171389	0.782593
Loxl3	a	3.68132	1.25967	0.235487	0.0802427	0.0865009	0.267639
Pcolce	a	7.20131	3.45182	0.70626	1.44646	0.43825	0.719286
Igf1	a	5.0143	0.132061	0.378899	0.691536	0.111722	0.637792
Colec12	a	7.21282	0.1997	0.853065	0.409281	2.14554	1.68914
BC039771	a	3.18067	0	0.156568	0.0653118	0.206609	0.207711
Lbp	a	6.9569	0.154255	1.12091	0.595213	2.26161	2.31045
Cygb	b	3.57527	3.63966	0.337607	0.0578345	0	0.605362
Olfml2b	b	4.65072	1.70877	0.365145	0.165589	0.0931616	0.127626
Daam2	b	3.94324	4.26742	0.218152	0.0882015	0.0752559	0.404658
Adamts2	b	7.87475	2.20184	0.535606	0.919787	0.278553	1.11909
Irs1	b	4.57691	3.02824	0.401525	0.250306	0.225367	0.43985
Col1a2	b	7.78972	3.253	0.967007	0.531872	0.160144	0.797933
Zfhx4	b	5.36835	2.42676	0.328867	0.0946578	0.0598316	0.0942186
Il34	b	5.83163	5.07093	0.148025	0.0232031	0.0423539	0.379516
Lrp1	b	8.21975	6.24235	1.16066	0.605718	0.463043	0.58246
S1pr3	b	5.97187	7.86279	0.408062	0.354238	0.15023	0.386593
Thsd4	b	6.24137	6.62638	0.255495	0.176272	0.0752896	0.383636
Notch3	b	6.8578	9.95425	0.647192	1.0271	0.407791	0.668307
Lhfp	b	7.26302	5.78534	0.4187	0.0746163	0	0.3382
Pdgfrb	b	8.00821	7.26912	0.461653	0.108317	0.0600736	0.350556
Rbms3	b	4.73463	4.6355	0.600425	0.0232031	0.285986	0.266807
Ptpn13	b	4.15913	0.834948	0.254651	0.28962	0.272093	0.332164
Sdc2	b	4.84159	3.40759	0.618008	0.465723	0.279514	0.33276
Ggt5	b	4.7925	2.69019	0.133327	0.183378	0	0.337619
Serpine2	b	9.70873	6.81279	0.36996	0.822513	0.113215	1.11272
Serping1	b	9.45707	7.68955	1.2512	0.309885	-0.500881	0.716584
Igfbp5	b	9.06857	8.6181	0.457598	0.156924	0.234321	1.10849
Bmp5	b	2.66186	1.29268	0.148431	0.0808985	0	0.0980492
Runx1	b	6.09972	4.15355	0.813618	0.457496	1.16958	0.73934
Fap	b	4.6746	1.33532	0.513785	0.334836	0.322022	0.206443
Speg	b	4.205	4.23976	0.317235	0.297139	0.905838	0.711746
Col6a2	b	5.85585	3.95615	0.546482	0.385005	0.282164	0.554077
Col6a1	b	7.02254	4.18419	0.419443	0.277817	0	0.390501
Dock7	b	4.33764	2.10744	0.139655	0.345017	0.166217	0.283375
Arhgap42	b	3.82095	2.7186	0.186894	0.124687	0.17687	0.0931311
1500009L16Rik	b	4.09039	3.17254	0.267993	0.415168	0.569898	0.483465
Tusc5	b	2.49256	1.87377	0.0838824	0	0	0.0267961
Steap4	b	6.40638	3.20586	0.314356	0.017902	0.0705238	0.16509
Gpc6	b	4.40311	3.41758	0.216144	0.15116	0.0692261	0.203503
Arhgap24	b	3.7914	2.94776	0.205427	0	0.0358332	0.0213531
Heyl	b	3.25847	2.77274	0.220944	0.187437	0.089434	0.171056
Gas1	b	4.11136	2.18041	0.424462	0.395248	0.361974	0.329062
Pcdh18	b	2.56917	2.18626	0.163744	0	0	0
Fst	b	4.41665	1.3594	0.0857671	0.0975273	0	0.256451
Pid1	b	4.09749	3.22808	0.0929683	0.063453	0.0588943	0.144493
Sema5a	b	4.08705	3.41085	0.266738	0.0533506	0	0.278177
Kirrel	b	5.31047	6.71791	0.323106	0.156135	0.238044	0.693904
Ednra	b	4.02517	7.08397	0.215837	0.073742	0.204024	0.315151
C1s	b	4.89095	7.27004	0.414554	0.0369941	0.129957	0.224028
Fxyd1	b	4.07357	6.23863	0.35796	0	0	0.181543
Fat1	b	6.65353	7.28143	0.557201	0.267549	0.201095	0.317935
Arhgef17	b	4.86759	6.97887	0.432174	0.35148	0.161889	0.407019
Plce1	b	2.52358	5.6552	0.251673	0.225618	0.0861306	0.163371
Prrx1	b	3.61596	2.8521	0.244757	0.175864	0.14133	0.223505
Arhgef10l	b	2.78222	4.25744	0.248614	0.232437	0.129429	0.401426
Antxr1	b	5.77381	4.35666	0.717619	0.32301	0	0.649236
Ptprs	b	4.38773	5.6931	0.78742	0.800696	0.803102	0.683819
Gpc1	b	2.97125	2.53827	0.200108	0.19871	0.33952	0.380535
Lpl	b	7.26903	4.34958	-0.179092	4.0916	0.383748	2.1209
Plxnb1	b	3.13558	4.56254	0.482635	0.515917	0.188365	0.350122
Arhgef25	b	2.97773	5.33523	0.608467	1.01105	0.581269	0.375437
Sntb1	b	1.83391	4.12939	0.250617	0.619687	0.120735	0.132805
AC158608.1	c	0.348933	4.47862	1.93274	0.276998	0.627035	0.440308
Mir22hg	c	1.6807	5.18559	3.33749	0.380681	0.920929	1.14019
Il6	c	0.524494	4.39725	2.32859	0.449381	0.990472	0.159435
Tnfrsf12a	c	0.138617	3.6501	2.72861	0.679048	1.31417	0.592008
Uap1	c	1.74432	4.76804	3.97496	-0.243554	0.663406	-0.393692
Emp1	c	0.845824	-2.82808	2.34788	-2.05721	0.180583	-3.04922
Lmna	c	-1.08422	3.96108	2.42966	-0.262105	-1.32461	-3.53897
Azin1	c	-0.92204	1.7936	2.15128	-1.17415	-2.74539	-2.74279
Slc20a1	c	-0.68299	2.34462	3.45311	0.747323	1.11517	-0.58349
Hbegf	c	1.35782	4.28245	3.55958	0.792683	2.05321	0.462272
Sqstm1	c	-1.06031	1.70552	0.858598	-2.09152	-0.801929	-1.94352
ENSMUSG00000104126	c	-0.609096	1.69013	0.465695	-0.653163	-0.449022	-0.688479
Gm12346	c	-1.32722	2.10304	1.25932	-0.877442	-0.0433545	-0.959948
Neat1	c	-0.767024	3.74312	1.72261	-1.18672	-1.2987	-2.56099
Gadd45b	c	-0.393783	6.83138	3.05889	-0.371048	0.903035	-0.960131
Irf1	c	-0.901383	2.54144	1.39831	-2.15803	-0.959404	-2.3284
Ier3	c	-1.85616	1.70591	1.34442	-2.06711	-1.47298	-2.23541
Ppp1r15a	c	-2.45918	2.09043	1.08186	-3.70393	-2.22421	-2.57771
Atf3	c	-1.39144	4.49564	2.51857	-2.50998	-1.73618	-2.78004
Arid5a	c	-0.682511	3.13268	1.38955	-1.49296	-0.816145	-1.27128
Slc25a25	c	0.566394	4.96511	2.85407	-0.208251	0.599155	0.583394
Ubc	c	-0.648903	1.43116	0.78825	-1.60816	-0.533524	-0.629901
Nfkbia	c	-2.37531	1.26214	0.571642	-2.00429	-0.904702	-1.33081
Slc38a2	c	-1.12947	1.90335	1.01144	-2.36708	-0.317036	-1.83095
Zfand5	c	-1.37294	1.21878	0.329551	-2.21596	-0.876158	-1.16226
Mafk	c	-0.0159398	5.06763	2.9553	0.483863	0.896503	-0.422548
Rel	c	1.09595	2.93217	3.24036	0.764167	1.73369	0.600637
Nr4a1	c	-2.73809	3.47231	0.576635	-4.52542	-2.06625	-1.86996
Fosb	c	-2.32318	2.43526	0.164999	-3.53492	-2.75528	-1.65733
Nr4a2	c	-1.04877	4.26442	2.48116	-1.49617	-0.362616	-0.464502
Bhlhe40	c	-2.97504	-0.650488	0.451405	-3.34522	-2.45141	-1.63871
Hes1	c	-0.850165	1.87814	1.40278	-0.591671	-1.2258	-1.22705
Erf	c	-2.3435	1.76529	0.736585	-2.39042	-0.336854	-1.41554
Hspa1b	c	-2.26902	1.99788	2.22016	-0.522614	-0.529368	-1.75519
Chka	c	1.39399	4.65139	3.36964	-0.0850226	1.23532	0.409335
Ifrd1	c	-1.66222	3.15483	0.654936	-3.05033	-1.01053	-1.80691
Csrnp1	c	-1.07329	2.47185	2.0482	-2.45726	-0.753207	-0.171118
Cdkn1a	c	-2.19221	1.50979	0.782154	-2.59925	-1.03516	-1.88803
Gm17024	c	0.603078	3.64397	2.03979	0.43317	1.4621	1.03448
Nr4a3	c	0.802681	6.42019	3.15222	0.404334	1.58886	1.26197
1700064E03Rik	c	1.12046	3.32857	2.67139	0.422218	1.01057	1.19153
Kdm6b	c	-1.30047	1.24022	0.476691	-2.05016	-1.42144	-1.32329
Pde4b	c	-1.15679	5.19642	2.50572	0.264453	1.2969	-1.18672
Litaf	c	-2.86799	0.309263	0.17651	-1.76744	-0.300948	-1.53546
Adamts9	c	-1.81466	2.14019	0.0437101	-2.16808	-0.392526	-1.18774
Skil	c	-1.06902	-1.46925	1.13641	-2.01249	0.606164	-2.18888
Map2k3	c	-1.07094	2.32556	0.948729	-2.37198	-1.22899	-1.08218
Gm5424	d	0.117552	0.628819	1.54646	0.62913	0.0498168	0.143139
Ass1	d	0.210567	0.498989	1.28953	0.830696	0.548407	0.225716
Gja5	d	0.104769	1.43618	3.05838	0.443574	0.441561	0.188402
Sulf1	d	3.9842	2.49723	3.12622	0.551649	-0.630252	-0.146366
Nuak1	d	1.02324	1.14061	2.86522	0.965029	0.228098	0.187439
Col5a2	d	5.02293	1.97769	2.47067	0.218575	0.0420024	0.10811
Emp3	d	4.10281	3.1304	3.22129	1.39253	0.957465	0.0564723
Tmem100	d	0.0617345	1.82047	1.45117	0	0.0318578	0
Ptprr	d	0.070316	1.12633	2.57489	1.63856	0.152374	0.0168556
Mall	d	0	0	2.81699	1.52138	0.243367	0.111649
Klf12	d	0.537875	1.19336	2.55638	0.434526	0.13647	0.0500359
Ssu2	d	0.492163	0.147652	2.91914	1.59477	0.386384	0.0119675
Cst3	d	1.65014	1.1637	0.910668	0.33139	-1.5469	-1.36939
Fbn1	d	7.30302	0.972786	4.37139	2.07179	0.0442532	0.436023
Syt11	d	0.0651623	2.5402	2.22783	0.420475	0.204058	0.032885
Edn1	d	0	0.62042	3.04987	0.421032	0.509325	0.0761929
Epha4	d	0	1.98798	3.60761	1.3308	0.651256	0.392943
Kcnn4	d	0.474658	1.05334	2.52843	0.776968	0.3788	0.349827
Prdm16	d	0.660783	4.3405	3.01262	1.83915	0.988275	0.390651
Bmx	d	0.361567	0.875943	2.42612	0.604268	0.0265221	0.0566912
Itpr3	d	-0.0791184	-0.568829	2.53778	0.982004	-0.0934169	-0.520796
Arhgef28	d	0.139584	1.41731	3.60611	1.64717	0.858168	0.256152
Fhl1	d	1.97627	1.92725	4.10168	2.74805	0.467461	0.437415
Clu	d	6.49571	0.837006	5.03402	0.992623	-1.05457	-0.900152
Itgb4	d	-0.14453	0.460822	3.69602	0.704087	-0.360142	-0.526411
Prune2	d	0	0.491306	2.26598	0.275972	0.286565	0.0318341
Cd24a	d	0.0795792	1.96236	3.76491	0.394988	0.480917	0.049993
Gprc5a	d	0.138617	0.111459	4.04743	0.962319	0.66638	0.153472
Col8a1	d	5.44637	1.43006	4.04333	0.825974	0.0752896	0.176341
Vegfc	d	4.73673	1.02881	5.03176	1.72497	0.0820255	0.245989
Eps8l2	d	0.221445	1.37736	3.5513	1.13758	0.358949	0.374655
Cdk19	d	-1.339	0.0376163	3.04731	0.0292034	0.0924862	-0.965566
Atp2a3	d	-0.851902	6.18634	4.21785	2.60038	-0.152483	-0.573895
Mecom	d	0.0692578	1.29121	4.72576	3.13287	1.35751	0.202919
Ace	d	2.2356	1.33837	4.82826	1.61199	0.182385	-0.669216
St8sia6	d	0.101103	0.133448	3.76454	1.34703	0.239432	0.0577412
S100a4	d	0	1.70907	2.71152	0.829552	0	0
Alpl	d	1.47858	1.16743	4.12981	1.14596	-0.441204	-0.525152
Stmn2	d	0	2.17193	5.54425	2.14492	0.295575	0.0259178
Fn1	d	-0.78025	2.33307	5.32004	1.6581	-0.778963	-1.22975
Ptprj	d	0.876136	1.67102	1.82685	0.720365	-0.189386	-0.259453
Ccnd2	d	0.283853	2.82244	2.39904	-0.771171	-1.22415	-1.96918
Ssfa2	d	-1.13966	1.36643	1.11437	-1.34778	-0.785816	-2.24229
Tox2	d	0.247347	2.33114	2.24274	0.523731	0.655589	0.382287
Amd1	d	0.336821	1.37	2.53132	0.903042	0.734549	0.528732
5730416F02Rik	d	0.0617345	0.209298	1.08612	0.553921	0.303008	0.0694432
Scd1	d	0.816571	0	1.38585	0.140679	0.368655	0.0265223
Cd9-ps	d	0.0581347	0.187564	0.696331	0.0952258	-1.1514	-0.778364
Plat	d	0.4929	2.04146	3.74486	0.979686	1.19046	0.170138
Nod2	d	0	1.06139	3.41828	1.21609	0.786702	0.119838
Ankrd33b	d	0.529755	0.687312	3.951	1.02305	2.21417	0.256282
Cyth3	d	-0.0859546	1.03589	2.04073	-1.37655	-0.439504	-1.50279
Fgfr3	d	1.15927	1.09914	4.31499	1.52152	0.714678	0.537238
Rhpn2	d	0.147955	0	2.6352	0.414795	0.214058	0.0901124
Trpv4	d	0.915273	2.02959	3.90819	1.07863	0.667947	0.18911
Atp13a3	d	1.88934	0.98245	1.76916	-2.06923	-1.88394	-2.61501
Lama3	d	-0.404798	0.0683312	3.78234	0.753352	0.508777	-0.629638
Slc6a6	d	2.4252	-1.38028	2.25971	-1.51781	-0.89702	-3.43763
Car7	d	0.275175	1.15159	4.18066	0.867047	1.75687	0.415778
Fbln5	d	3.86218	-2.73734	2.73141	-3.23644	-2.90959	-2.29145
Plcg2	d	0.437281	1.41245	3.94272	0.500813	0.918052	0.315044
Nebl	d	0.594179	0.287703	4.336	1.28363	0.290034	0.199728
Gja4	d	0.0692578	6.10797	5.24162	0.907014	1.07384	0.055626
Aif1l	d	0	1.27659	3.7433	0.587257	0	0.0106112
Pcsk5	d	1.48693	1.92134	5.06423	0.852412	0.427308	0.380608
Sema3g	d	-0.379034	1.36393	6.04617	1.32642	2.2855	-0.525206
Hey1	d	0.852331	1.36953	3.22282	1.01921	0.30558	0.0372444
Tgfb2	d	0.46585	2.63484	2.66679	0.776463	0.331154	0.21561
Egfl8	d	0.320207	1.65168	2.17704	0.201443	0	0.133911
Cecr2	d	0.261684	0.955225	2.65507	0.926823	1.12491	0.354733
Sh3bp4	d	-0.672415	-1.25161	2.70622	0.759255	-0.786312	-0.44929
Ptplad2	d	0.327495	0.154255	2.39107	1.72304	0.232028	0.117314
Pitpnm3	d	0	1.45855	1.83579	0.661942	0.242363	0.0274929
Gpr30	d	0.58054	1.86398	2.66375	0.127348	0.0358332	0.145123
Igf2	d	1.72902	5.63831	3.96687	1.33417	0.137887	0.290497
Scara3	d	4.53071	2.96375	2.66215	0.760081	0.220419	0.188436
Htra1	d	3.22208	6.20673	3.38037	1.10354	0.258469	0.454437
Atp2b2	d	0.127407	0.14723	1.93117	0.263485	0.0752896	0.202073
Tppp3	d	0	3.53886	3.3622	2.8887	0.0441754	0.0345311
Jag1	d	-1.02901	1.97879	0.888615	-2.45696	-2.73325	-0.965204
Apba1	d	0.260237	0	2.26525	1.08348	0.89781	0.690917
Fam107a	d	0.173559	0.716002	1.93564	0.711455	0.12089	0.0675397
F2rl1	d	0.0651623	0.899194	0.879346	0	0	0.0285855
Kcnn3	d	0.36323	1.62707	1.9383	1.06243	0.657435	0.619418
Myrip	d	0.23541	0	1.99097	0.557437	0	0.125536
Gcnt1	d	0	0	0.684483	0.0206243	0.212179	0.00901638
Kcne3	d	0	0.734651	0.980478	0.0274649	0.292746	0.169666
Megf6	d	0.103693	0.154255	1.07177	0.214005	0.325874	0.473
Samd12	d	0.135713	0.450848	1.95742	0.919774	0.415732	0.264219
Dkk2	d	0	0	1.17601	0.0232031	0	0
Cmklr1	d	0	0.824964	1.41547	0.0550539	0.532709	0.0180654
Gata6	d	0	0	0.604543	0.0912936	0.1042	0
Cytl1	d	0.154853	1.37716	2.14084	0.455724	0	0.0119675
Gkn3	d	0	1.0733	2.29813	0.414737	0	0.00767977
Pthlh	d	0	0	1.00617	0.0687654	0	0
Adra2c	d	0	0	0.972895	0.11777	0.0862133	0.117769
Klk10	d	0	0	0.536069	0	0	0.0203992
Plek2	d	0	0.828397	0.981786	0.0489362	0.0423539	0
Emp2	d	4.48955	1.46666	3.58838	1.76618	0.334162	0.177178
Tmem158	d	0.142487	0	1.45437	0.708913	0.725905	0.572579
4933423P22Rik	d	0.362276	0	0.878542	0.0198293	0.119062	0.0212942
Klk11	d	0	0	0.422979	0.210828	0	0.00873384
Irf6	d	0	0	0.616022	0.0232031	0	0.0162621
Eln	d	-0.244785	1.53241	3.23933	0.942725	0.416697	0.204035
Anpep	d	0.415348	2.01109	0.69587	0.107013	0	0.0757799
Trpm6	d	0.25402	0	0.677964	0	0	0.0111151
Vwf	e	-0.158879	0.965896	2.19389	2.21468	0.675315	-0.364621
ENSMUSG00000104079	e	0	0	1.67505	1.48448	0.090777	0
ENSMUSG00000103738	e	0	0.189742	1.72253	1.09258	0.18029	0
mt-Rnr2	e	-0.591983	0.597449	0.528863	0.350291	-0.224085	-0.342331
4930452L02Rik	e	0	0.416933	0.891519	0.987767	0.180529	0
Spata13	e	-0.132905	-0.657694	3.30783	1.35041	2.30194	-0.505948
Smad7	e	-0.801789	0.237491	1.43815	-0.859728	0.309918	-2.06132
Ptprm	e	-2.57932	-3.74256	0.908469	-0.470165	-0.714492	-2.4563
Entpd1	e	-3.25989	0.152548	1.09542	-1.4662	-0.666383	-3.08004
P2ry2	e	0.360113	0.259111	4.56234	3.16132	0.0441754	0.039889
Tm4sf1	e	-2.34943	-2.01444	1.15098	-0.586236	-1.42426	-2.56836
Heg1	e	-2.00044	-3.3643	1.06806	-0.906067	-0.259947	-1.83483
Epas1	e	-0.4621	0.694607	1.07625	-0.329011	-0.720942	-1.14322
Nos3	e	-2.37609	-3.60256	1.64392	-0.855278	-1.29981	-2.57153
Gm8995	e	0.276769	1.36418	5.06433	2.57491	1.65218	0.26279
Sema7a	e	0.501857	-0.0146081	4.50697	3.10289	2.25273	-1.31926
Ceacam1	e	-0.556783	0.888233	4.09498	2.9057	1.76378	-0.403709
Pkn3	e	-2.07385	-1.5615	2.24544	1.29335	-0.0835358	-2.36592
Efnb2	e	-2.26636	0.640047	2.44479	0.589401	0.689395	-2.96929
Slc9a3r2	e	-2.25297	-3.17644	1.14742	-0.00420392	-0.953179	-2.64836
Fxyd5	e	-4.3397	-3.07106	1.51177	-1.07051	-0.219819	-4.23172
Plcb1	e	-0.508816	-0.782661	3.56272	1.49476	2.46835	-1.89884
Jag2	e	-1.40234	-0.149545	4.02704	2.58745	0.704909	-1.182
Ly6a	e	-4.77391	-5.32497	1.18354	0.433278	-0.0737321	-3.68056
Ltbp4	e	-3.73937	-3.68975	1.77501	0.49497	-1.18172	-4.7602
Ly6c1	e	-4.4104	-5.25333	1.15169	0.854135	0.127196	-5.79401
Fbln2	e	-3.7886	-1.81806	3.94866	1.21048	-1.22066	-4.37889
Podxl	e	-5.79193	-3.38879	2.07825	0.783323	-1.72357	-5.83981
Pecam1	e	-3.27546	-6.36402	0.588094	-0.00492726	0.125008	-1.27794
Adam15	e	-2.39481	-3.39118	0.708926	-1.01518	-0.405272	-2.41989
Col18a1	e	0.882365	5.01034	3.80622	0.0772882	2.22925	-0.902757
Gm9581	e	0.903398	0.880118	3.61402	2.97996	1.00412	0.710398
Pdgfd	e	-0.0988313	2.13289	3.34602	1.66828	0.267125	0.0468813
Epb4.1l4a	e	0.765251	1.2379	2.99068	2.31535	0.389116	0.160066
Rnf125	e	2.06168	1.56015	3.69176	2.66874	1.79101	0.299747
Unc13b	e	0.922784	0.183189	3.04097	1.77854	0.474194	-0.398405
Rtn4	e	-1.17865	-1.5037	1.25517	-1.23953	-0.74979	-1.86933
Palmd	e	-2.46147	-3.13111	0.974929	-0.22704	-0.486031	-1.96757
Sox7	e	-2.282	-3.83059	1.34542	-0.698901	-0.0867558	-1.91305
Nedd9	e	-1.21348	-1.17225	1.32928	0.0254626	-0.225798	-2.12284
Akap2	e	-0.420775	-0.585971	1.45517	1.08138	0.320436	-0.45028
Ptma	e	-0.651416	0.486392	0.927136	-0.110875	-0.335344	-0.945648
Plec	e	-1.53832	1.47834	1.25968	-1.03225	-0.12406	-1.70327
Myo1d	e	-0.256041	3.31173	2.46441	1.75042	1.48188	-0.732242
Ly6c2	e	-0.622426	-0.234865	0.485416	0.383927	-0.0162687	-0.755502
Prnp	e	1.01828	2.84143	3.64287	3.61515	2.0203	0.292487
Gm2830	e	0.346058	3.1999	1.82113	1.116	0.784896	0.221674
Tspan13	e	-3.35872	-2.80124	0.813415	2.49942	-1.10093	-2.26876
Pls3	e	-1.90118	2.15346	0.939809	0.165703	-1.28621	-2.43185
Cxcr7	e	0	2.64302	3.862	2.5138	1.53091	0.116656
Myadm	e	0.290744	2.39075	0.821089	1.23077	-1.39757	-3.14672
Tmem255b	e	0	2.51733	3.45078	3.06111	0.803204	0.00809409
Cd97	e	-1.30216	0.361281	1.60219	0.410878	1.06933	-2.77868
Tmtc1	e	0.486508	3.05278	2.56285	2.66231	1.23777	-0.731799
Ptrf	e	-1.69276	1.95089	0.787249	1.533	-2.27946	-2.17919
Myo1e	e	-0.838018	2.09539	2.68694	1.45737	-0.104853	-1.44646
Sox13	e	-1.64434	1.19486	3.61254	1.20065	1.14223	-1.1041
4930578C19Rik	e	0	0.784834	3.59377	3.90794	2.20165	0.0575644
Pcdh1	e	-0.811081	1.4234	2.59144	1.30459	0.858528	-1.54807
Mast4	e	-1.85778	1.12035	1.68025	-0.216218	-0.160014	-2.83301
Syne2	e	-0.785847	2.59063	0.850377	0.208181	-1.97239	-3.56992
Ebf1	e	2.21711	2.35192	1.62924	-0.339115	-1.05036	-4.04183
Utrn	e	-1.91234	1.01823	0.845519	0.102985	-0.444814	-2.14859
Akap13	e	-1.76076	-0.37817	1.15374	-0.50725	-0.185528	-3.35533
Itpkb	e	-2.19965	-0.368056	0.580496	0.829697	-0.210493	-3.04729
Sptbn1	e	-1.34334	-0.422771	0.681671	0.773619	0.11315	-1.25334
Lims2	e	-1.27911	1.64107	3.00008	4.07721	1.86204	-0.915915
Mgll	e	-4.28915	-1.67203	0.912421	0.273579	-0.218267	-3.80782
Vim	e	-1.23189	1.47527	1.77674	0.123382	-1.11132	-4.02538
Clic5	e	0.722621	0.539776	4.3365	4.92218	0.766361	0.0586815
Cd200	e	-2.79959	-0.334242	1.01251	1.16663	-0.448626	-3.97065
Kitl	e	2.37909	1.58944	1.16237	1.5386	-2.26646	-4.68449
Ahnak	e	-0.799644	0.118661	0.79049	0.581835	-0.534489	-2.52893
Cd34	e	-2.84529	-3.70656	2.69546	2.69055	4.0973	-3.34596
Ptprg	e	-1.30202	-1.94257	1.3093	0.574727	-1.85685	-3.95935
Syne1	e	-2.22369	2.47477	1.97419	1.45341	-1.18851	-3.84263
Rasgrf2	e	-2.05487	-2.28131	2.26244	1.53781	-1.46853	-3.56739
Crip1	e	-1.57439	4.70458	2.31378	1.32763	-2.32602	-3.45604
Cav2	e	-3.81993	0.200658	0.769006	1.02245	-1.08301	-3.73326
Cdh13	e	-1.21034	-1.05582	5.28481	4.37707	0.117284	-1.70719
Bcam	e	-3.96705	2.93077	1.59613	1.12738	-0.749825	-4.25347
S100a6	e	-1.53757	3.13425	2.55694	2.59897	-1.89705	-3.02344
Sparcl1	e	-1.22621	9.32356	5.35412	6.69674	1.76406	-1.68441
Jam2	e	-3.97644	-2.31896	1.66032	1.88341	-0.498602	-5.00079
Cav1	e	-6.92809	0.399201	1.38336	1.75273	-2.0067	-7.35545
Tspan2	e	0.614527	2.38045	3.1494	5.27429	0.41095	0.60834
C1qtnf9	e	0	1.80805	2.28666	4.76848	0.325174	0
Meox2	e	0.259996	2.58367	2.25675	4.07222	0.0973977	0.0216567
Cep85l	e	-0.0415902	1.32074	2.52173	2.22333	0.579021	-0.616194
Ehd4	e	0.357835	1.75977	3.21103	1.59313	0.209561	-0.792296
Lmo7	e	4.09638	2.68315	3.31763	3.89042	0.422161	0.278286
Capg	e	0.786222	1.66229	3.97726	2.68245	1.43337	0.741337
Ecm2	e	1.70234	3.45158	2.63827	2.94832	0.366609	0.18604
Cyb561	e	1.28768	0.858111	3.18835	2.88637	1.91911	0.741816
S100a10	e	-1.70306	-3.5874	0.730203	0.838142	-0.678404	-2.26669
Fstl1	e	5.56432	2.97656	2.66263	1.17267	-0.686064	-1.57321
Pdlim1	e	-0.855684	0.53157	1.6077	2.30221	-1.94775	-1.80069
ENSMUSG00000107211	e	0.503295	1.51744	2.10935	3.09484	0.0949779	-0.250052
Stxbp6	e	1.89465	1.84326	0.229878	2.24542	0	0
Col15a1	e	0.064924	0.0882405	1.42424	3.2634	2.49629	0.105747
Piezo2	e	0.234066	0	0.656345	0.669537	2.91146	0.183402
Rnd2	f	0.491685	4.62604	0.57606	0.079433	0.679642	0.37947
Fgl2	f	1.03757	4.04212	0.32778	0.239264	0.15987	0.124133
Ncs1	f	0.586012	3.26014	0.0784591	0.108025	0.0800864	0.0481075
Adamtsl1	f	0.100072	4.75693	0.327192	0.255807	0.155618	0.0940157
Pde5a	f	3.42677	6.26475	0.759157	1.06663	0.364225	0.617092
Pln	f	0	5.16219	0.780419	0.506567	0.458286	0.1435
Bmpr1a	f	1.98348	4.46875	0.488483	0.020689	0.373128	0.234036
Pip5k1b	f	0	3.04213	0.259362	0	0	0
Fmod	f	0.339113	3.91655	0.509916	0.678558	0	0
Mlf1	f	0.146228	3.46852	0.159753	0.173157	0	0
Etnk2	f	0	3.82813	0.373393	0.143967	0.161755	0
Kcnq4	f	0.12019	4.0147	0.0860943	0.243485	0.484897	0.178929
Gdf15	f	0	5.12787	0.279774	0.0333585	0.35978	0.0249147
Cacna2d1	f	0.525361	4.60656	0.234701	0.247787	0	0.278745
Map2	f	0.0617345	3.50781	0.291734	0.436433	0	0
Mustn1	f	0	8.07993	1.1319	2.15503	0.0498168	0.0363957
Trpv2	f	1.194	5.29938	0.43614	0.60262	0.322176	0.677186
Kcnab1	f	0.770054	4.51896	0.479885	0.290168	0.102633	0.137616
Cpe	f	0.598579	6.61477	0.932302	0.86594	0.333302	0.236537
Akap6	f	0.0910452	5.59147	0.62862	0	0	0.00873384
Gm2301	f	0	3.28903	0.266868	0.235845	0	0.0092438
Myl9	f	5.1887	10.7423	1.42958	1.43313	0.527685	0.428797
Fgf1	f	1.0543	6.17536	0.276716	0.250397	0.530851	0.324928
Kcnt1	f	1.61506	5.29931	0.227354	0.30509	0.452374	0.373231
Tbx2	f	1.53541	5.85001	0.351894	0.509316	0.401389	0.514762
Mark1	f	3.21038	6.33524	0.33821	0.210882	0.114896	0.310724
Ppp1r14a	f	0.104769	4.47327	0.256035	0.248789	0	0.05388
Gucy1a3	f	1.57193	8.11296	0.921479	0.242437	0.107004	0.0305068
Foxs1	f	0.310041	3.05108	0.0585629	0	0	0.00892662
Atp1b2	f	1.21702	7.22006	0.485787	0.481185	0.606389	0.511949
Gucy1a2	f	0	4.27164	0.273905	0	0	0.0462131
Synpo2	f	2.44004	7.42619	0.114042	0.0893607	0.0845074	0.228712
Slc4a3	f	1.2347	6.30956	0.39261	0.0735932	0.0727007	0.0703024
Tagln	f	0.898554	10.7296	0.980528	0.564776	0.584261	0.444123
Mrvi1	f	0.914572	7.90817	0.432679	0.686179	0.165608	0.296757
Rbpms2	f	0.277828	6.16321	0.288826	0.592499	0.223265	0.356012
Pdlim3	f	0	5.79357	0.488563	0.0378785	0	0.0210895
Tpm2	f	1.51949	10.033	0.781016	0.828982	0.381689	0.0792542
Gucy1b3	f	0.183302	5.91563	0.358519	0.443185	0.0442532	0.0226382
Scn4b	f	0.0795792	3.83244	0.13255	0	0.0265221	0.114861
Cacna1c	f	2.51457	7.43797	0.520604	0.722342	0.59992	0.490603
Cox4i2	f	0	4.47363	0.267859	0.196286	0.0546175	0
Ebf2	f	1.06255	5.99854	0.279918	0.381128	0.296816	0.222119
Rgs7bp	f	0.850665	5.04135	0.119592	0.0333206	0.235902	0.03203
Hopx	f	0	3.73109	0.05461	0.194609	0	0
Rasl12	f	0.90625	6.49757	0.103627	0.0398729	0.0766787	0.0842096
Des	f	1.30766	8.57907	0.484774	0.619921	0.885193	0.596293
Aspn	f	0.155238	7.02817	0.490183	0.137427	0.0318578	0.0260693
Ntrk2	f	0.20992	6.78825	0.260664	0.251278	0.184686	0.221598
Olfr558	f	0	5.32207	0.115589	0	0	0.0079015
Acta2	f	0.300778	12.0847	1.1041	0.633823	0.313868	0.254849
Myh11	f	0.803721	10.8536	0.509922	0.272559	0.579256	0.104375
Lmod1	f	0	6.54494	0.171062	0	0.191815	0
Myom1	f	0.0732293	6.48672	0.155719	0.302024	0	0.102677
Slc38a11	f	0	5.13476	0.169443	0	0	0
Crispld2	f	0.0795792	8.89719	0.392169	0.0446418	0.154258	0.0514808
Ndufa4l2	f	0.528282	6.31594	0.214421	0.0333206	0	0
Cryab	f	0	6.35977	0.134259	0	0	0.00790905
Npy1r	f	0	6.47364	0.130585	0.0587203	0	0
Aoc3	f	0.119522	8.10587	0.187048	0.0395044	0	0.0104743
Tuba1c	f	3.01261	6.07424	1.30127	0.486002	0.296893	0.46214
Sgip1	f	0	3.5522	0.297508	0.214681	0.378997	0.234766
Gsn	f	3.129	7.69266	1.31794	1.20402	-0.237487	-0.669294
Lrig1	f	1.92191	5.13091	0.478551	0.644699	0.998642	0.707601
Smarcd3	f	2.55755	4.96132	0.46872	0.076401	0.337901	0.266725
Rcan2	f	2.17134	8.57605	0.538736	0.353433	1.61455	2.0823
Prkg1	f	2.2947	5.60343	0.68904	0.213941	0.641782	0.585945
Nfatc4	f	1.43586	4.36283	0.260548	0.229255	0	0.284013
C1qtnf7	f	1.12998	4.01258	0.0518865	0.280742	0	0.00810176
Epb4.1l1	f	1.86364	5.79058	0.487524	0.225442	0.0548228	0.359733
Pde1a	f	1.99271	5.05226	0.263868	0.112012	0.0982472	0.152186
Higd1b	f	0	2.55819	0.110297	0.131209	0	0
Ano1	f	0.146897	5.48096	0.25548	0.0689853	0.0442532	0.0799262
Casq2	f	0.119522	6.39732	0.25213	0.313144	0.22995	0.0290535
Cspg4	f	0	5.13015	0.329211	0.109239	0.0451735	0.00986698
Vtn	f	0	3.47872	0.121697	0.0607855	0	0.0109312
Lin7a	f	0.617092	2.9995	0.148196	0	0.0540364	0
Rgs5	f	0.491377	7.06214	1.07083	1.44304	0.667872	0.0824523
Egflam	f	0	2.79904	0.184443	0.0206243	0.230364	0.174151
Sobp	f	0.962072	2.58254	0.28788	0.249532	0.225737	0.323039
Serpini1	f	0	4.8079	0.971296	0.121129	0.343053	0.0156211
Slc6a9	f	0.588499	3.40888	0.187141	0.0720206	0	0.184886
Etv1	f	0.696436	1.73559	0.228475	0.185304	0.168461	0.0315688
Gm5454	f	0.568189	1.43901	0.171758	0.0570043	0.158226	0.0660212
Rasl11a	f	0	6.98812	1.09883	0.358408	0.254991	0.0346951
Sod3	f	2.6104	7.38698	0.415702	0.26655	0	0.69362
Ccdc3	f	0.424644	5.35282	0.527323	0.327166	0.282176	0.184494
Mamdc2	f	0	4.56375	0.273187	0.017902	0	0.00790905
Fam65b	f	0.139574	4.07704	0.160296	0.278281	0.683546	0.255661
Adcy5	f	0.674515	5.23747	0.28201	0.710111	0.835379	0.6339
Asb2	f	0.699627	4.53043	0.312597	0.738494	0.576486	0.551013
Ndrg2	f	2.87912	7.15045	0.387673	0.122213	0.0790926	0.214402
Col4a6	f	0	3.46627	0.0831355	0.0325325	0	0.0626052
Ngf	f	1.3754	4.3398	0.0921135	0.0587203	0.0581292	0
Irs2	f	2.01115	7.40704	0.843019	0.310799	0.616034	0.173251
Kcne4	f	0.503543	4.74826	0.0768169	0	0	0.0311284
Spdya	f	0	2.74252	0.104389	0	0	0.0702681
Cnn1	f	0	4.71604	0.0778555	0.0258894	0	0.0553069
Wnk2	f	0.233532	3.8669	0.136262	0.298445	0.148368	0.306156
Gm13861	f	0.249749	3.54251	0.103576	0	0	0
Cacnb2	f	0.0732293	4.43522	0.151515	0	0.25237	0.0581115
Grip2	f	0	5.31656	0.283344	0.0274649	0.20757	0.0116541
Gm3470	f	0	3.35967	0.0598247	0.218022	0	0.0210945
Ctnna3	f	0.100072	4.51172	0.188149	0.078669	0	0.0110616
Slc2a4	f	0.429604	5.89079	0.130225	0.0258894	0.0464316	0.0710077
Hspb2	f	0	3.82037	0.0352874	0	0	0
Xirp1	f	0.0624834	4.96122	0.0847025	0.0963197	0.0939478	0.0675149
Parm1	f	0.0795792	5.73179	0.0167113	0.0390245	0.09407	0.0482421
Atp1a2	f	0.0732293	5.69784	0.141362	0.0736874	0	0.0251917
Pde3a	f	0.762596	8.21752	0.403272	0.330276	0.322991	0.17932
Nrip2	f	1.08381	8.82162	0.226525	0.0365297	0.30774	0.0626049
Cap2	f	0	6.51295	0.034613	0.0889985	0	0.0602637
Itga7	f	0	5.73304	0.109268	0.0319911	0	0.0109312
Tesc	f	0.0732293	4.98645	0.129607	0	0.199765	0.0295039
Slc6a17	f	0.0732293	6.45145	0.105371	0.1677	0.042704	0.080836
Dgkb	f	0	6.25081	0.0698707	0	0.0548228	0.00820816
Cacna1h	f	0.369576	4.76633	0.337125	0.978669	0.760126	0.747797
Sox5	f	0.922854	3.37876	0.299872	0.101125	0.0420024	0.103674
P2rx1	f	0	3.89723	0.22278	0.30682	0.324048	0.0185357
Usp2	f	0.119522	4.93772	0.917297	0.192091	0.0982895	0.205727
Tgfb3	f	3.17171	5.51397	0.2779	0.0395044	0.252891	0.309267
Dmd	f	0.881801	7.90153	1.45567	1.18844	0.867844	0.822044
Gm13889	f	1.28922	7.31976	0.81636	0.211701	2.06145	1.74583
Jph2	f	-0.457077	3.16786	-0.161118	0.0115158	0.059329	-0.115231
Dmpk	f	3.33399	7.15551	0.440819	0.195177	0.711553	1.92497
Rrad	f	0.755803	7.99868	1.86769	0.335523	0.551112	0.358161
Pi15	f	2.1583	4.09739	0.134314	0	0	0.0490098
RP23-202I21.2	f	0.58928	2.48913	0.0953358	0	0	0
Ildr2	f	1.42423	2.13015	0.16711	0.168805	0.0800864	0.0758393
Dzip1l	f	0.847249	2.89178	0.223567	0.322353	0.248889	0.374113
Mutyh	f	0.488999	2.5299	0.079278	0.0923571	0.180742	0.154804
Itga8	f	1.88841	4.20126	0.254603	0.017902	0.257129	0.515883
Cd63	g	2.48216	0.632623	-1.69499	-3.58908	-0.366177	0.45422
Cd63-ps	g	2.57821	0.2818	-1.63187	-3.46782	-0.175104	0.580707
Mylk	g	1.87126	4.45722	-2.00261	-3.04678	-1.78098	1.29973
Prelp	g	6.50212	2.79442	-0.465709	-0.336684	-0.0803044	4.86862
Rarres2	g	5.76701	5.47451	0.231884	0.0739173	0.383261	3.04841
Bgn	g	2.72932	-1.1042	-2.83777	-5.16419	-1.39595	0.871432
Axl	g	4.53353	7.00022	0.670684	0.0318123	0.72524	3.91551
Rtn4rl1	g	3.87066	4.29051	0.231622	0.0581435	0.153028	2.68525
Lbh	g	2.8959	5.09945	-0.0539885	-0.535786	1.51231	2.46539
Map1b	g	2.0568	3.13655	-1.39894	-1.71697	-0.18561	2.05718
Tmem176a	g	2.41228	-3.2043	-2.51453	-4.15391	-1.21138	0.943932
Tgfbr3	g	1.86095	-2.24861	-2.22508	-2.28942	-0.114726	1.10882
Vstm4	g	3.40028	2.18274	0.413583	0.143517	0.92119	3.70711
Smap2	g	0.570128	-1.38029	-1.3655	-2.36351	-0.462037	1.45148
Cd302	g	6.53493	0	0.82788	0.330898	0.872753	4.06289
Cotl1	g	3.06249	0.471707	1.16168	0.187045	3.49448	4.3706
Dapk2	g	3.00618	-0.901113	-0.45242	-0.155329	3.40468	3.37994
Dock8	g	2.65743	1.9651	-0.906521	-1.63862	1.25575	2.93928
Nid1	g	0.90811	-4.66864	-2.30854	-3.34895	-0.0633689	1.18654
Slc7a2	g	2.65738	3.41355	0.289409	0.242363	1.62084	4.24214
Ly96	g	1.70514	0.486987	0.768875	0.0768771	2.06781	3.86989
Ap2s1	g	1.13007	-3.02222	-2.52605	-1.83354	-0.667129	1.35486
Xbp1	g	0.555754	-2.74332	-2.71713	-4.64699	-0.231701	1.34147
Nr2f2	g	0.00749032	1.47826	-2.61831	-2.24369	-0.358636	2.03205
Igfbp4	g	2.19065	-0.869155	-2.75696	-6.49197	0.0608055	1.14101
Trf	g	4.32275	0	0.298275	0.0875319	1.16491	3.02705
C1qtnf1	g	1.45568	0.541864	-1.83065	-3.09156	-0.585704	2.87009
Rcn3	g	1.89036	-2.50448	-3.08002	-4.57623	-0.0118845	1.34567
Ctsl	g	1.67054	-1.80063	-2.8632	-2.35898	0.125118	2.63526
Rnase4	g	2.42611	-2.83899	-2.25297	-3.77633	0.238979	3.10544
Stab1	g	0.100001	-6.381	-3.382	-4.29621	0.793148	1.95568
Irf8	g	3.65258	0.071247	-0.30456	-0.473826	1.2359	4.5888
Mafb	g	1.67598	-2.31784	-2.44423	-3.42023	1.55762	3.8959
Kcnj8	g	4.72997	0.888907	0.40345	0.0937387	3.7364	6.26713
Chst2	g	3.63604	-1.35954	-0.8421	-1.10812	2.71475	5.278
Abcc9	g	4.93025	-0.326449	-1.53167	-1.90687	4.03219	6.62218
Serpina3f	g	4.84947	0.162368	0.163127	0.11113	1.73295	3.90637
Man2a1	g	0.437352	-2.95539	-2.19086	-2.74699	-0.0453037	1.0067
Slc29a1	g	1.79406	-1.759	-2.51121	-4.03012	-0.393462	0.803517
Tns3	g	5.7636	0.736809	-0.469374	-1.24774	0.777116	2.61353
Armcx4	g	4.06625	0.111459	0.632171	0.300095	1.58744	3.73367
Arrb1	g	0.327031	-1.57432	-2.03448	-2.8551	0.577986	1.26325
Ugcg	g	0.486742	-1.31471	-1.69529	-3.28773	-1.33302	0.936323
Fscn1	g	0.878641	-2.72466	-1.81903	0.0250233	1.43781	1.32562
Mgat4b	g	0.734241	-3.31668	-2.20919	-2.99862	0.404976	1.08437
Tcn2	g	0.313638	-4.84244	-3.23362	-4.21056	0.334935	1.36964
Cmtm3	g	0.156873	-4.22199	-2.40582	-2.55456	1.7152	2.03805
Pde2a	g	0.431915	-6.08868	-3.61799	-2.47959	0.601319	1.19471
Maf	g	2.74689	-0.892202	-1.0234	-1.62997	0.747542	2.78183
Lgmn	g	0.433497	-4.33544	-3.23663	-5.67133	0.223414	1.65982
Sepp1	g	1.45857	-4.97966	-2.149	-2.53582	0.399087	2.11996
Lrg1	g	-0.518143	-7.67339	-3.91668	-6.27726	-0.787165	1.86341
Fam167b	g	2.95413	-1.0855	-0.0906804	-1.03588	3.79502	5.09035
Tfpi	g	1.75795	-5.87955	-4.25391	-5.59127	0.742402	3.43927
Apoe	g	2.31882	-6.622	-3.95836	-3.20406	0.121867	1.64199
Srgap1	g	0.835008	-1.48106	-0.504908	-1.23932	1.79283	2.87669
Fcgrt	g	0.545356	-3.6772	-2.78792	-3.36778	0.0903986	0.944743
Exoc3l2	g	0.770007	-3.59701	-1.40076	-2.53964	0.289664	1.55465
Fam124a	g	3.1326	1.06956	-0.263969	-0.941479	2.2977	3.07964
Tmem176b	g	2.46048	-4.24718	-2.33974	-4.01039	-0.86371	0.796286
Angptl4	g	5.59567	-0.179395	0.409243	-0.40432	2.28736	3.88684
Mtss1l	g	3.81627	1.95778	-0.345886	-0.176278	2.40847	3.27237
Meis2	g	2.02827	1.96809	0.148849	0	0.2632	1.53123
Vegfb	g	2.26954	2.08006	0.311801	0.235021	0.736541	2.23247
Aplnr	g	0.872298	0	1.17867	3.30622	5.7215	2.22726
Cdk18	g	2.02923	0.657609	0.383122	0.0786361	0.666454	3.35424
Tgfbi	g	4.16487	0.328787	0.30152	0.272806	1.99649	3.923
Ltc4s	g	2.26347	0	0.380786	0.0277058	2.08898	3.04056
Slc16a9	g	2.81565	0.657639	0.20821	0.493079	0.497854	3.28391
Wdr17	g	1.60137	0	0.0908431	0	0.793434	2.23808
Epor	g	2.58675	0.162368	0.22468	0.460132	2.32614	4.04326
Slc39a8	g	2.79326	0.118753	0.468569	0.212144	1.6389	3.80691
1810011H11Rik	g	2.43159	0.246402	0.0885224	0.157306	0.581898	3.42359
Zfp521	g	1.98553	1.61603	-1.20174	-1.08097	0.665403	3.23024
Sult1a1	g	0.602912	-2.87772	-3.83697	-0.803608	-1.03908	1.64076
Thrsp	g	2.12085	-3.70383	-2.50752	-1.28816	0.362751	2.64047
Gm10800	g	1.26596	-0.959067	-1.501	-0.200555	-0.619865	2.75622
Serpina3g	g	5.2201	0.118753	0.441902	0.118838	2.03497	5.14192
Ralgapa2	g	0.415495	0.366504	-2.82893	-3.70026	-0.119207	1.53638
Crygn	g	1.241	0	0.0292313	0	0.747608	3.43018
Gpr160	g	3.09597	0	0.928513	0.195021	4.08465	5.64454
Snx8	g	3.7137	0.299953	0.685437	0.265779	3.10995	4.68319
Glis3	g	3.04749	0.162368	0.107592	0.131184	0.700143	3.46492
Adh6b	g	3.44351	0	0.118654	0.0570073	1.41248	4.7044
Hivep3	g	2.09881	-0.879443	-0.223718	-0.718079	1.05582	4.02459
Gm16270	g	1.57004	0	0.0510993	0	0.622635	3.67966
Myo7a	g	2.15057	-1.07582	-0.97856	0.354347	2.82023	4.05449
Dclk1	g	4.78487	0	0.0754339	0.196576	0.337762	4.56993
Ston2	g	1.70985	0	0.0652386	0.323517	0.291668	4.97919
Tmem106a	g	3.39645	-1.31703	-0.230042	-1.07793	2.42299	4.43243
Ap1b1	g	2.56389	-0.791652	-2.10912	-1.94478	-0.589145	3.13879
Mmrn1	g	3.50798	0.133448	0.197843	0.214259	1.07758	4.8477
Flt4	g	-0.702096	-6.0734	-2.89265	-3.90868	-0.0983992	2.43277
Cxadr	g	4.26821	0.33474	0.46717	0.247745	0.904065	5.52783
Gpr97	g	2.80367	-1.30218	-0.570112	-1.22542	2.38648	4.72868
Col6a3	g	3.55842	4.07979	-0.847844	-0.74442	0.781069	4.98593
Gm1673	g	2.24297	0.154255	0.203759	0.315301	2.84264	4.20388
Cyp4b1	g	1.0217	-5.41886	-4.22764	-3.35436	-1.0324	2.78309
Rgs4	g	5.64661	6.50902	0.312193	0.27078	1.14262	7.52714
Sema3a	g	3.5882	0.23616	0.1463	0.0594522	0.305207	5.67156
Clca1	g	5.17643	0.162368	0.780421	0.375495	1.89447	6.59386
Sirpa	g	4.07472	0.394054	0.411884	0.186675	2.20462	6.55885
Adamts5	g	5.89527	1.95792	0.424654	0.252043	1.9304	7.47844
Ubd	g	4.59666	0	0.0991271	0.0255513	1.60255	6.07508
Dnase1l3	g	2.2299	-1.93578	-3.39989	-1.82808	0.229773	3.34296
Aldob	g	4.69556	0.111459	0.0300409	0.0904447	0.414232	7.29524
Gpr182	g	3.54587	-1.3714	-1.10753	-0.874052	4.04898	6.05296
F8	g	2.77426	-2.87114	-2.15793	-2.84906	2.16849	4.78359
Lipg	g	5.03604	0	0.128935	0.166929	2.1773	7.10299
Mrc1	g	4.37334	-1.0162	-0.54066	-0.904152	3.52435	6.68657
Stab2	g	5.84354	-1.00072	-1.56721	-1.70932	3.89883	8.83952
Nrcam	g	2.4986	0	0.318016	0.0390245	2.65366	3.73904
Nat8l	g	1.6327	1.19552	0.0393119	0.0600871	1.50712	2.85503
Cdkl1	g	2.35875	0	0.0391019	0	0.223481	3.07749
Tmem37	g	4.72514	0.369536	0.320605	0.295554	0.940706	3.61173
Ccdc69	g	1.7054	0.154255	0.065055	0.305201	0.191053	2.76521
Ptges	g	3.28589	0.118753	0.182797	0.138453	0.797412	2.67863
Tkt	g	1.16152	-0.682822	-0.839572	-1.54642	-0.528718	2.30993
Cfd	g	2.82989	0	0.0702264	0.0719813	0.0982472	2.62127
Afap1l2	g	1.06213	-0.41842	-1.08748	-3.72507	-3.07487	1.64022
Tmem132e	g	1.92459	0	0.076132	0.136315	0.420503	2.9401
Cadm3	g	1.54395	0.488821	1.05571	0.687662	1.64042	4.71219
Il6st	g	0.497936	-3.39794	-1.03503	-3.65779	-0.790683	1.53405
Il13ra2	g	1.60111	0	0.0573226	0.081857	1.17135	3.65166
Bend4	g	2.72508	0	0.606711	0.306418	3.00747	4.23528
Aebp1	g	2.14351	-0.68956	-0.397757	-0.993288	2.23301	3.33279
Ctnnal1	g	3.74555	0.578721	0.977363	0.255907	2.40268	4.6052
Cd55	g	3.54924	0	0.869742	0.27844	0.990741	5.13461
Darc	g	6.09991	0.570802	0.582166	0.436656	1.82287	7.38181
Vcam1	g	4.62984	-4.00313	-3.0474	-3.75611	-0.107338	4.52599
Gpr126	g	3.209	1.4518	0.1363	0.0974913	1.16533	6.00842
Sele	g	6.26199	0.259111	0.501629	0.207205	1.29638	7.45761
Selp	g	4.23331	-0.899788	-0.281497	-0.86354	2.00272	5.87253
Gpm6a	g	5.67662	0	0.517443	0.198758	3.35021	7.33984
Bok	g	1.7957	-1.37842	-1.48583	-0.703102	1.51263	2.97012
C5ar2	g	2.31097	0	0.123802	0.101047	1.10449	2.83805
Fblim1	g	1.78137	0.267917	0.203847	-0.772286	2.19774	3.74955
Ptger2	g	1.53996	0.552837	0.0198334	0.0365297	0	2.79193
ENSMUSG00000106633	g	0.518786	0	0.0106803	0	0	1.10065
Mpp1	g	1.78982	0.841481	0.171725	-0.202233	0.981522	3.12087
Actn1	g	1.17642	2.15235	-1.34375	-1.71548	-1.48768	1.26293
Adh1	g	5.42587	0.99551	0.353788	2.86372	0.733877	3.60808
Gpr88	g	4.262	0.801996	0.127755	0.317923	0.531965	1.78362
