# Supplementary material for: Stromal inflammation is a targetable driver of hematopoietic aging
Source: Research Square preprint supplement (doi:10.21203/rs.3.rs-1065222/v1), 2021-11-12
Supplement: Supplementary file 2 [file af66fbf056649349e7fe67ce.xlsx]

## Sheet: MSC-L like DEG
Ensembl ID	baseMean	log2Fold Change	lfcSE	stat	P-value	Padj	Gene Symbol
ENSMUSG00000044349	93.8915	-5.24656	0.61258	-8.5647	1.08357e-17	1.0127e-13	Snhg11
ENSMUSG00000049336	7.96565	-6.35613	0.947816	-6.70608	1.9992e-11	9.34225e-08	Tenm2
ENSMUSG00000029309	5.70329	-4.107	0.638649	-6.43077	1.26958e-10	3.95515e-07	Sparcl1
ENSMUSG00000028681	9.33785	-4.08573	0.696357	-5.86728	4.42989e-09	1.03504e-05	Ptch2
ENSMUSG00000040488	4.35168	-3.79998	0.657191	-5.78215	7.37535e-09	1.15524e-05	Ltbp4
ENSMUSG00000062098	5.56271	5.20667	0.900619	5.78121	7.41649e-09	1.15524e-05	Btbd3
ENSMUSG00000045102	10.8681	-5.48662	0.957597	-5.72957	1.00683e-08	1.34426e-05	Poln
ENSMUSG00000021943	64.637	-3.4535	0.625709	-5.51934	3.40276e-08	3.53358e-05	Gdf10
ENSMUSG00000050010	13.281	-4.91606	0.889524	-5.52662	3.26462e-08	3.53358e-05	Shisa3
ENSMUSG00000027463	12.266	-4.90567	0.93983	-5.21974	1.79171e-07	0.000167453	Slc52a3
ENSMUSG00000020077	4.01066	-2.687	0.547711	-4.90587	9.30147e-07	0.000790287	Srgn
ENSMUSG00000035713	15.3893	-4.67695	0.964141	-4.8509	1.22905e-06	0.000883589	Usp35
ENSMUSG00000092274	608.963	-1.47619	0.303925	-4.8571	1.19116e-06	0.000883589	Neat1
ENSMUSG00000031788	9.00353	-3.65123	0.770048	-4.74156	2.12079e-06	0.00141578	Kifc3
ENSMUSG00000006205	99.5152	2.00172	0.425964	4.69927	2.6109e-06	0.00162677	Htra1
ENSMUSG00000097574	6.79353	-1.51571	0.323461	-4.68592	2.78706e-06	0.00162799	C920006O11Rik
ENSMUSG00000052911	148.405	-1.55088	0.332591	-4.66302	3.11603e-06	0.00171308	Lamb2
ENSMUSG00000064339	3997.86	-0.788953	0.172034	-4.58603	4.51751e-06	0.00234559	mt-Rnr2
ENSMUSG00000027339	4.53642	-4.44428	0.972042	-4.57211	4.82845e-06	0.00237509	Rassf2
ENSMUSG00000037679	4.60407	-3.74863	0.825484	-4.54113	5.59548e-06	0.00261477	Inf2
ENSMUSG00000027750	3.41068	-4.85668	1.08777	-4.46481	8.01398e-06	0.0035666	Postn
ENSMUSG00000044468	4.7966	-4.29451	0.96742	-4.43914	9.03203e-06	0.00383697	Fam46c
ENSMUSG00000047875	8.38499	-3.66472	0.828507	-4.42328	9.72139e-06	0.00395026	Gpr157
ENSMUSG00000022463	22.0176	-2.59926	0.59192	-4.39123	1.12713e-05	0.00420807	Srebf2
ENSMUSG00000029306	1627.67	1.36408	0.311222	4.38298	1.17066e-05	0.00420807	Ibsp
ENSMUSG00000030218	549.525	-1.61287	0.36749	-4.38888	1.13935e-05	0.00420807	Mgp
ENSMUSG00000031825	1.65339	-3.58035	0.820908	-4.36145	1.29206e-05	0.00447244	Crispld2
ENSMUSG00000030729	8.36361	-4.43077	1.01916	-4.34748	1.37713e-05	0.00459668	Pgm2l1
ENSMUSG00000003032	2.43133	-3.12389	0.722151	-4.32582	1.51967e-05	0.00489754	Klf4
ENSMUSG00000033066	7.35432	-3.83654	0.891865	-4.30171	1.69484e-05	0.00528	Gas7
ENSMUSG00000073542	4.97515	-4.77659	1.11868	-4.26983	1.95622e-05	0.00589768	Cep76
ENSMUSG00000005774	5.08416	-3.77959	0.892238	-4.23609	2.27451e-05	0.00644168	Rfx5
ENSMUSG00000063450	183.137	-1.36986	0.32317	-4.23883	2.24691e-05	0.00644168	Syne2
ENSMUSG00000034656	2.6512	-4.14891	0.984849	-4.21274	2.52291e-05	0.00693504	Cacna1a
ENSMUSG00000018143	3.53647	-3.78666	0.90338	-4.19165	2.76928e-05	0.0071229	Mafk
ENSMUSG00000030249	11.2116	3.61641	0.86361	4.18754	2.8199e-05	0.0071229	Abcc9
ENSMUSG00000032076	26.6863	-3.73741	0.890292	-4.19795	2.69336e-05	0.0071229	Cadm1
ENSMUSG00000009566	7.1976	-3.71698	0.894292	-4.15634	3.23391e-05	0.00774978	Fpgs
ENSMUSG00000040712	35.9887	-1.7308	0.416112	-4.15945	3.19011e-05	0.00774978	Camta2
ENSMUSG00000025340	10.2306	-2.87026	0.69334	-4.13976	3.47674e-05	0.00812339	Rabgef1
ENSMUSG00000032232	4.23686	-3.60868	0.885026	-4.07748	4.55259e-05	0.010158	Cgnl1
ENSMUSG00000034810	8.06197	-3.4022	0.835638	-4.07138	4.6736e-05	0.010158	Scn7a
ENSMUSG00000097572	3.07659	-4.12029	1.01172	-4.07257	4.64968e-05	0.010158	Gm26797
ENSMUSG00000048078	22.2319	-3.10036	0.764014	-4.05798	4.9498e-05	0.0105138	Tenm4
ENSMUSG00000057329	43.2699	-2.46671	0.615468	-4.00786	6.12721e-05	0.0127255	Bcl2
ENSMUSG00000062515	5.58584	-3.39075	0.848297	-3.99713	6.41155e-05	0.0127494	Fabp4
ENSMUSG00000092341	6181.75	-0.741674	0.18555	-3.99717	6.41043e-05	0.0127494	Malat1
ENSMUSG00000035202	2784.21	-0.750729	0.188455	-3.98359	6.78815e-05	0.0132171	Lars2
ENSMUSG00000021313	19.8901	-3.7772	0.952147	-3.96703	7.27738e-05	0.0138805	Ryr2
ENSMUSG00000052566	4.03971	-3.88249	0.98351	-3.94759	7.89419e-05	0.0147558	Hook2
ENSMUSG00000031843	4.34979	3.60893	0.916358	3.93834	8.2048e-05	0.0150357	Mphosph6
ENSMUSG00000060924	283.138	-1.08516	0.276378	-3.92638	8.62344e-05	0.015499	Csmd1
ENSMUSG00000056310	16.8925	3.20185	0.818973	3.90959	9.24541e-05	0.0163033	Tyw1
ENSMUSG00000025982	186.255	-1.08332	0.281513	-3.84822	0.00011898	0.0202179	Sf3b1
ENSMUSG00000028063	76.206	-1.61817	0.420272	-3.85028	0.000117984	0.0202179	Lmna
ENSMUSG00000023827	11.1363	-3.10239	0.810917	-3.82578	0.000130359	0.0213744	Agpat4
ENSMUSG00000029416	11.4719	-3.08535	0.806316	-3.82647	0.000129994	0.0213744	Slc15a4
ENSMUSG00000068036	55.4235	-1.67346	0.441574	-3.78976	0.000150792	0.0242983	Afdn
ENSMUSG00000025558	2.69181	3.6781	0.973733	3.77732	0.000158523	0.0248101	Dock9
ENSMUSG00000029165	2.46369	-3.86461	1.02453	-3.77209	0.000161889	0.0248101	Agbl5
ENSMUSG00000034826	6.09417	-3.4287	0.909962	-3.76796	0.000164586	0.0248101	Nup54
ENSMUSG00000064368	37.1129	-1.2365	0.327837	-3.7717	0.000162136	0.0248101	mt-Nd6
ENSMUSG00000031626	88.0822	-1.50429	0.402038	-3.74167	0.0001828	0.0266946	Sorbs2
ENSMUSG00000039232	2.37704	-1.7322	0.462602	-3.74448	0.000180771	0.0266946	Stx11
ENSMUSG00000008398	12.8157	-2.8249	0.757676	-3.72837	0.000192721	0.0271159	Elk3
ENSMUSG00000030123	134.694	-1.02419	0.274437	-3.73195	0.000190004	0.0271159	Plxnd1
ENSMUSG00000054814	18.58	-2.42612	0.651099	-3.7262	0.00019439	0.0271159	Usp46
ENSMUSG00000022037	596.057	1.00178	0.269626	3.71545	0.000202844	0.0278791	Clu
ENSMUSG00000087363	8.19773	-3.38965	0.914545	-3.70638	0.000210243	0.0284772	Gm16347
ENSMUSG00000026875	2.55846	-3.86209	1.04674	-3.68964	0.000224568	0.029983	Traf1
ENSMUSG00000021282	50.8913	-1.57576	0.428186	-3.68008	0.000233164	0.030281	Eif5
ENSMUSG00000047878	10.6441	-4.09362	1.11338	-3.67674	0.000236231	0.030281	A4galt
ENSMUSG00000068631	4.23836	0.821466	0.223441	3.67643	0.00023652	0.030281	Gm7676
ENSMUSG00000020027	16.7164	-1.97067	0.543233	-3.62767	0.000285991	0.0348356	Socs2
ENSMUSG00000020140	40.5238	-2.88401	0.794092	-3.63184	0.000281412	0.0348356	Lgr5
ENSMUSG00000020674	2.65305	-3.80502	1.04809	-3.63044	0.000282935	0.0348356	Pxdn
ENSMUSG00000052397	4.34809	-3.75225	1.0346	-3.62676	0.000287004	0.0348356	Ezr
ENSMUSG00000021134	165.264	-0.882461	0.244642	-3.60716	0.00030957	0.0361655	Srsf5
ENSMUSG00000028248	180.44	-1.19225	0.330516	-3.60724	0.000309471	0.0361655	Pnisr
ENSMUSG00000055067	20.1555	-2.16009	0.598308	-3.61033	0.000305809	0.0361655	Smyd3
ENSMUSG00000027981	53.719	-2.30519	0.640613	-3.59841	0.000320174	0.0369143	Rnpc3
ENSMUSG00000029313	80.1931	-1.31112	0.364911	-3.59298	0.000326915	0.0369143	Aff1
ENSMUSG00000040723	9.84565	-3.16974	0.882381	-3.59226	0.000327829	0.0369143	Rcsd1
ENSMUSG00000031633	117.168	1.07577	0.300861	3.57563	0.000349379	0.0387381	Slc25a4
ENSMUSG00000037773	16.9446	-2.54594	0.713025	-3.57062	0.000356137	0.0387381	Pced1a
ENSMUSG00000040037	20.4559	1.88127	0.527358	3.56735	0.000360605	0.0387381	Negr1
ENSMUSG00000065037	95.1586	-0.784101	0.219794	-3.56744	0.00036049	0.0387381	Rn7sk
ENSMUSG00000001138	8.27353	2.65297	0.747591	3.54869	0.000387148	0.0403706	Cnnm3
ENSMUSG00000020422	395.958	-0.637251	0.179629	-3.5476	0.00038876	0.0403706	Tns3
ENSMUSG00000029263	9.39224	3.23831	0.911624	3.55224	0.000381963	0.0403706	Pigg
ENSMUSG00000001435	14.3622	-2.4546	0.693097	-3.54149	0.000397874	0.0408629	Col18a1
ENSMUSG00000006262	24.7606	-2.23867	0.635711	-3.52152	0.000429081	0.043589	Mob1b
ENSMUSG00000035011	25.0637	-1.66821	0.474907	-3.51271	0.000443562	0.0445756	Zbtb7a
ENSMUSG00000021699	27.6429	-2.28193	0.651436	-3.50292	0.000460181	0.0457537	Pde4d
ENSMUSG00000031980	298.951	1.22488	0.352624	3.47362	0.000513491	0.0499905	Agt
ENSMUSG00000074622	47.2982	-2.33432	0.671938	-3.47401	0.000512742	0.0499905	Mafb
ENSMUSG00000059013	11.7824	2.53717	0.731835	3.46686	0.000526571	0.0507354	Sh2d3c
ENSMUSG00000037071	16.7687	-2.68328	0.775057	-3.46204	0.000536106	0.051127	Scd1
ENSMUSG00000025085	5.76258	-3.22235	0.932147	-3.45692	0.000546392	0.0515816	Ablim1
ENSMUSG00000001025	21.4945	-1.63165	0.472456	-3.45354	0.000553281	0.0517097	S100a6
ENSMUSG00000049305	10.4098	2.80188	0.813338	3.44492	0.000571227	0.0524141	Ccdc71
ENSMUSG00000060636	3.30713	-1.96614	0.570799	-3.44454	0.000572035	0.0524141	Rpl35a
ENSMUSG00000041997	16.0046	-1.99324	0.579198	-3.44138	0.000578749	0.0525144	Tlk1
ENSMUSG00000021250	1471.78	-1.76929	0.516319	-3.42673	0.000610896	0.0543756	Fos
ENSMUSG00000033392	29.2056	-1.40388	0.409595	-3.42749	0.0006092	0.0543756	Clasp2
ENSMUSG00000037408	15.7083	-1.97403	0.576768	-3.42257	0.000620323	0.0546938	Cnnm4
ENSMUSG00000026628	3.4484	-1.74596	0.510662	-3.41901	0.000628502	0.054897	Atf3
ENSMUSG00000086782	3.01556	-3.12177	0.914573	-3.41336	0.000641673	0.0555285	E130102H24Rik
ENSMUSG00000070576	1.87773	-3.09242	0.908003	-3.40574	0.000659845	0.0562401	Mn1
ENSMUSG00000086324	981.689	-0.576758	0.169392	-3.40488	0.000661932	0.0562401	Gm15564
ENSMUSG00000005087	6.10201	-2.10989	0.620258	-3.40163	0.000669841	0.0563994	Cd44
ENSMUSG00000043702	21.6049	-2.87608	0.847005	-3.39558	0.000684821	0.0571459	Pde12
ENSMUSG00000023224	1897.39	0.665443	0.196416	3.38793	0.000704219	0.0572315	Serping1
ENSMUSG00000024750	60.9579	-1.6126	0.475651	-3.3903	0.000698164	0.0572315	Zfand5
ENSMUSG00000028410	67.6736	-1.4463	0.426888	-3.388	0.00070404	0.0572315	Dnaja1
ENSMUSG00000027966	3.02752	2.50676	0.742844	3.37454	0.000739396	0.0590632	Col11a1
ENSMUSG00000038608	62.4178	-1.76687	0.523227	-3.37687	0.00073315	0.0590632	Dock10
ENSMUSG00000009741	31.9279	-1.4228	0.422775	-3.36539	0.000764367	0.0597374	Ubp1
ENSMUSG00000032175	27.2752	-2.11027	0.626636	-3.36763	0.000758185	0.0597374	Tyk2
ENSMUSG00000103733	2.98367	-2.71876	0.808088	-3.36443	0.000767011	0.0597374	Gm6162
ENSMUSG00000022246	105.301	-1.06883	0.318321	-3.35772	0.00078588	0.0603225	Rai14
ENSMUSG00000027661	7.23424	-2.82893	0.842653	-3.35717	0.000787433	0.0603225	Slc2a10
ENSMUSG00000060675	8.12223	-2.76394	0.828967	-3.33419	0.000855475	0.0650022	Pla2g16
ENSMUSG00000106106	21567.2	-0.469101	0.140908	-3.32913	0.000871191	0.0656625	CT010467.1
ENSMUSG00000020424	4.30616	-3.23636	0.976567	-3.31401	0.000919671	0.068762	Gatsl3
ENSMUSG00000089706	27.1156	-2.25112	0.680032	-3.31032	0.000931904	0.0691236	B230216N24Rik
ENSMUSG00000039840	57.6377	-1.66005	0.501876	-3.3077	0.000940649	0.0692228	Epg5
ENSMUSG00000023886	32.7881	-2.30044	0.699715	-3.28768	0.00101017	0.0737579	Smoc2
ENSMUSG00000037300	4.77669	-3.17459	0.96698	-3.28299	0.00102711	0.0738413	Ttc13
ENSMUSG00000038301	7.1025	-2.87504	0.875214	-3.28496	0.00101998	0.0738413	Snx10
ENSMUSG00000021770	35.0262	-1.72306	0.528962	-3.25744	0.0011242	0.0797643	Samd8
ENSMUSG00000037876	113.855	-1.14437	0.351374	-3.25685	0.00112657	0.0797643	Jmjd1c
ENSMUSG00000031502	135.658	1.06718	0.329779	3.23605	0.00121195	0.0851642	Col4a1
ENSMUSG00000019278	435.772	0.901441	0.278923	3.23186	0.00122987	0.0857787	Dpep1
ENSMUSG00000033149	55.0171	-1.38975	0.430554	-3.22781	0.00124741	0.0863581	Phldb2
ENSMUSG00000037993	5.12118	-2.68422	0.832173	-3.22555	0.0012573	0.0864021	Dhx38
ENSMUSG00000032289	95.5685	-1.35416	0.421551	-3.21232	0.00131669	0.0891724	Thsd4
ENSMUSG00000064337	618.521	-0.610962	0.190164	-3.21281	0.00131442	0.0891724	mt-Rnr1
ENSMUSG00000020363	6.60499	-2.27882	0.711014	-3.20503	0.00135049	0.0905247	Gfpt2
ENSMUSG00000020738	3.89387	-2.18248	0.681205	-3.20385	0.00135603	0.0905247	Sumo2
ENSMUSG00000032193	18.5282	-2.77727	0.871283	-3.18756	0.00143478	0.0951022	Ldlr
ENSMUSG00000086859	17.1246	-2.35305	0.741083	-3.17514	0.00149762	0.0985686	Snhg20
ENSMUSG00000022053	5.30685	3.15901	0.996759	3.16928	0.00152815	0.0998113	Ebf2
ENSMUSG00000071984	41.8027	-2.67547	0.844678	-3.16744	0.00153786	0.0998113	Fndc1
ENSMUSG00000090877	5.63156	-2.75514	0.870819	-3.16385	0.00155697	0.100355	Hspa1b
ENSMUSG00000024754	77.3773	-1.46194	0.463444	-3.15451	0.00160769	0.102914	Tmem2
ENSMUSG00000021901	12.0249	-2.49004	0.790351	-3.15055	0.00162963	0.103609	Bap1
ENSMUSG00000027751	44.7077	-1.52659	0.485915	-3.14168	0.00167983	0.106079	Supt20
ENSMUSG00000037416	36.5483	-1.33743	0.426682	-3.13448	0.00172157	0.106555	Dmxl1
ENSMUSG00000041408	30.3682	-1.60873	0.512841	-3.13691	0.00170741	0.106555	Wapl
ENSMUSG00000073405	1.90552	-1.49075	0.475426	-3.13562	0.00171493	0.106555	H2-T-ps
ENSMUSG00000012609	17.2958	-1.97613	0.634407	-3.11493	0.00183992	0.113131	Ttll5
ENSMUSG00000105733	4.07609	-3.09617	0.994776	-3.11243	0.00185551	0.113344	Gm42973
ENSMUSG00000040565	37.4418	-1.71982	0.553278	-3.10842	0.00188088	0.114148	Btaf1
ENSMUSG00000060126	16.7952	-1.19231	0.3843	-3.10255	0.00191858	0.115684	Tpt1
ENSMUSG00000026743	33.6948	-1.17886	0.380791	-3.09583	0.00196266	0.117583	Mllt10
ENSMUSG00000031765	44.0195	-1.53946	0.49856	-3.08782	0.00201633	0.120029	Mt1
ENSMUSG00000019997	238.446	-1.46488	0.475079	-3.08346	0.0020461	0.121031	Ctgf
ENSMUSG00000021508	540.478	-0.673638	0.218834	-3.0783	0.00208186	0.122371	Cxcl14
ENSMUSG00000031722	1865.71	0.868057	0.28329	3.0642	0.00218256	0.127489	Hp
ENSMUSG00000021948	29.8292	-1.81996	0.595056	-3.05847	0.00222467	0.129142	Prkcd
ENSMUSG00000020262	106.951	-1.1562	0.379589	-3.04593	0.00231962	0.133042	Adarb1
ENSMUSG00000020716	93.5449	-1.02689	0.33738	-3.04373	0.00233669	0.133042	Nf1
ENSMUSG00000021319	569.353	0.96292	0.316237	3.04493	0.00232735	0.133042	Sfrp4
ENSMUSG00000024943	39.6311	-1.9192	0.631243	-3.04035	0.00236304	0.133042	Smc5
ENSMUSG00000096255	1.57357	1.7285	0.568494	3.0405	0.00236189	0.133042	Dynlt1
ENSMUSG00000022878	545.009	0.942324	0.311553	3.0246	0.0024896	0.138499	Adipoq
ENSMUSG00000040249	525.078	-0.526209	0.173974	-3.02465	0.00248921	0.138499	Lrp1
ENSMUSG00000024965	1.53039	-1.78935	0.592805	-3.01845	0.00254072	0.13968	Fermt3
ENSMUSG00000031503	132.47	0.816617	0.27044	3.01958	0.00253124	0.13968	Col4a2
ENSMUSG00000022678	12.4415	-2.33701	0.775069	-3.01523	0.00256787	0.140347	Nde1
ENSMUSG00000003541	4.42084	-2.09959	0.698503	-3.00585	0.00264841	0.143075	Ier3
ENSMUSG00000070729	31.3967	-0.855533	0.284607	-3.00602	0.00264692	0.143075	Gm12966
ENSMUSG00000023118	15.3325	-1.66348	0.554213	-3.00151	0.00268643	0.144096	Sympk
ENSMUSG00000037905	4.90863	2.89946	0.966425	3.00019	0.00269814	0.144096	Bri3bp
ENSMUSG00000025366	38.3523	-1.33994	0.448388	-2.98835	0.00280488	0.148339	Esyt1
ENSMUSG00000095041	52.3242	-0.867756	0.290427	-2.98787	0.00280933	0.148339	AC149090.1
ENSMUSG00000024593	7.60933	-3.2427	1.08758	-2.98158	0.00286763	0.148827	Megf10
ENSMUSG00000027358	9.05968	-2.75006	0.92283	-2.98002	0.00288227	0.148827	Bmp2
ENSMUSG00000037270	111.647	-1.00205	0.336119	-2.98124	0.00287084	0.148827	4932438A13Rik
ENSMUSG00000052727	115.479	-1.61182	0.540093	-2.98435	0.00284185	0.148827	Map1b
ENSMUSG00000019923	35.2062	1.83241	0.616392	2.9728	0.00295101	0.149484	Zwint
ENSMUSG00000024878	7.24423	-3.17517	1.06809	-2.97275	0.00295146	0.149484	Cbwd1
ENSMUSG00000031762	18.3442	-1.8618	0.626467	-2.9719	0.00295964	0.149484	Mt2
ENSMUSG00000032186	2.30509	-2.97903	1.00294	-2.97031	0.00297496	0.149484	Tmod2
ENSMUSG00000073700	7.47092	-2.41724	0.812383	-2.97549	0.00292517	0.149484	Klhl21
ENSMUSG00000061411	8.08907	-2.20053	0.744321	-2.95643	0.00311222	0.155545	Nol4l
ENSMUSG00000069833	400.334	-0.546555	0.185253	-2.95032	0.0031745	0.157813	Ahnak
ENSMUSG00000027460	114.604	-1.9193	0.651812	-2.94456	0.00323411	0.158251	Angpt4
ENSMUSG00000034574	15.7443	-1.70795	0.579674	-2.9464	0.00321499	0.158251	Daam1
ENSMUSG00000034640	17.7427	-2.33118	0.791499	-2.94527	0.00322668	0.158251	Tiparp
ENSMUSG00000028108	228.729	-0.930878	0.317171	-2.93494	0.00333613	0.160851	Ecm1
ENSMUSG00000031171	12.3177	-2.59122	0.88209	-2.93759	0.00330772	0.160851	Ftsj1
ENSMUSG00000074415	91.4539	-0.965953	0.329151	-2.93468	0.00333887	0.160851	2610203C20Rik
ENSMUSG00000025492	264.488	0.608126	0.207368	2.93259	0.00336143	0.161107	Ifitm3
ENSMUSG00000053825	16.1467	-2.30298	0.786086	-2.92967	0.00339317	0.161799	Ppfia2
ENSMUSG00000071369	46.1429	-1.23094	0.420871	-2.92476	0.00344727	0.163544	Map3k5
ENSMUSG00000037822	57.405	-1.05242	0.360077	-2.92277	0.00346935	0.16376	Smim14
ENSMUSG00000082691	11.2218	1.18882	0.407291	2.91884	0.00351335	0.165004	Dynlt1-ps1
ENSMUSG00000030089	11.7182	-3.11129	1.06923	-2.90984	0.0036161	0.16898	Slc41a3
ENSMUSG00000030020	12.8967	2.62604	0.903225	2.9074	0.00364442	0.169456	Prickle2
ENSMUSG00000028444	6.93145	-2.4507	0.844418	-2.90224	0.00370504	0.171098	Cntfr
ENSMUSG00000040147	37.8882	1.75565	0.605129	2.90129	0.00371633	0.171098	Maob
ENSMUSG00000032525	184.71	-0.799898	0.276336	-2.89465	0.00379577	0.17305	Nktr
ENSMUSG00000062270	26.066	-1.08839	0.375872	-2.89565	0.00378375	0.17305	Morf4l1
ENSMUSG00000032264	15.824	-2.31116	0.798929	-2.89283	0.00381789	0.173214	Zw10
ENSMUSG00000015085	12.1187	-2.12645	0.736216	-2.88835	0.00387272	0.174852	Entpd2
ENSMUSG00000028788	33.1616	-1.00128	0.347248	-2.88347	0.00393322	0.176138	Ptp4a2
ENSMUSG00000046491	2.95087	-3.26089	1.13166	-2.88151	0.00395774	0.176138	C1qtnf2
ENSMUSG00000090841	19.2258	0.700148	0.24297	2.88162	0.00395633	0.176138	Myl6
ENSMUSG00000022836	134.019	-0.761039	0.265563	-2.86576	0.0041601	0.184267	Mylk
ENSMUSG00000020263	85.1699	-1.19177	0.417042	-2.85768	0.00426751	0.186374	Appl2
ENSMUSG00000021244	57.4248	-1.0846	0.37937	-2.85895	0.0042504	0.186374	Ylpm1
ENSMUSG00000026004	30.7509	-1.43283	0.501248	-2.85852	0.00425616	0.186374	Kansl1l
ENSMUSG00000026365	432.629	-0.557353	0.195259	-2.85442	0.0043115	0.18739	Cfh
ENSMUSG00000036617	7.93981	2.65933	0.932115	2.853	0.00433087	0.18739	Etl4
ENSMUSG00000073867	44.7591	-0.612452	0.214786	-2.85145	0.00435197	0.187435	AA474408
ENSMUSG00000022533	189.215	-0.753965	0.264576	-2.84972	0.00437582	0.187598	Atp13a3
ENSMUSG00000031885	25.6751	-1.77099	0.621956	-2.84745	0.00440711	0.188077	Cbfb
ENSMUSG00000017446	16.3854	-1.90734	0.673459	-2.83216	0.00462348	0.190632	C1qtnf1
ENSMUSG00000027820	179.648	0.797576	0.28166	2.8317	0.00463015	0.190632	Mme
ENSMUSG00000030518	2.91181	-2.73506	0.965014	-2.83422	0.00459373	0.190632	Fam189a1
ENSMUSG00000038784	42.9144	-1.29991	0.458876	-2.8328	0.00461419	0.190632	Cnot4
ENSMUSG00000055723	8.95543	-2.11062	0.742982	-2.84074	0.00450093	0.190632	Rras2
ENSMUSG00000063458	5.03252	-2.25254	0.794796	-2.83411	0.0045953	0.190632	Lrmda
ENSMUSG00000073411	1942.92	0.52065	0.183642	2.83513	0.00458069	0.190632	H2-D1
ENSMUSG00000075014	5.65862	-1.5523	0.547563	-2.83493	0.00458354	0.190632	Gm10800
ENSMUSG00000058486	8.52673	-2.68426	0.948984	-2.82856	0.00467581	0.19083	Wdr91
ENSMUSG00000079499	17.2595	-1.88892	0.667607	-2.82939	0.00466375	0.19083	6530402F18Rik
ENSMUSG00000031371	10.9171	-3.13403	1.10916	-2.8256	0.00471922	0.191765	Haus7
ENSMUSG00000020120	2.68983	-1.55674	0.55133	-2.8236	0.0047487	0.192127	Plek
ENSMUSG00000020827	4.18847	-1.95373	0.692753	-2.82024	0.00479882	0.193318	Mink1
ENSMUSG00000048118	30.2724	-1.61876	0.574942	-2.81551	0.00486999	0.195343	Arid4a
ENSMUSG00000039782	1.93331	-2.89947	1.03153	-2.81085	0.0049411	0.197348	Cpeb2
ENSMUSG00000024298	54.3936	-1.37314	0.489954	-2.80259	0.00506949	0.201615	Zfp871
ENSMUSG00000055204	110.507	-0.973321	0.347952	-2.79729	0.00515339	0.204083	Ankrd17
ENSMUSG00000022012	4.32433	-2.59901	0.930991	-2.79166	0.00524379	0.206787	Enox1
ENSMUSG00000018593	809.932	0.511867	0.183538	2.7889	0.00528879	0.207685	Sparc
ENSMUSG00000040170	275.661	-0.95781	0.344358	-2.78144	0.00541182	0.211627	Fmo2
ENSMUSG00000003119	38.7319	-1.26042	0.454376	-2.77396	0.00553789	0.21393	Cdk12
ENSMUSG00000008384	21.1434	-2.07722	0.749131	-2.77285	0.00555684	0.21393	Sertad1
ENSMUSG00000020023	17.5712	-1.63492	0.589076	-2.7754	0.00551331	0.21393	Tmcc3
ENSMUSG00000107019	6.33746	-3.00007	1.08207	-2.77253	0.00556228	0.21393	Gm43682
ENSMUSG00000056749	6.43889	-2.63228	0.950173	-2.77032	0.00560015	0.214504	Nfil3
ENSMUSG00000064373	831.16	0.578988	0.209295	2.76637	0.00566838	0.216231	Selenop
ENSMUSG00000028800	16.8587	-1.22441	0.442877	-2.76468	0.00569786	0.216472	Hdac1
ENSMUSG00000028229	14.1633	-1.79614	0.650078	-2.76297	0.00572786	0.216731	Rmdn1
ENSMUSG00000043415	6.54196	2.50069	0.905636	2.76125	0.0057581	0.216997	Otud1
ENSMUSG00000056220	10.8702	-2.54743	0.924802	-2.75457	0.00587697	0.220587	Pla2g4a
ENSMUSG00000022016	51.7257	-1.36216	0.495016	-2.75175	0.00592777	0.220775	Akap11
ENSMUSG00000078794	1.8972	1.37057	0.498085	2.75167	0.00592922	0.220775	Dact3
ENSMUSG00000028517	428.679	0.624394	0.227206	2.74814	0.00599337	0.222278	Plpp3
ENSMUSG00000001870	215.327	0.655717	0.238945	2.74422	0.00606551	0.222307	Ltbp1
ENSMUSG00000050954	2.55631	-2.5202	0.918113	-2.74498	0.00605145	0.222307	Zfp169
ENSMUSG00000087604	3.21574	-0.930041	0.338727	-2.74569	0.00603836	0.222307	Cdrt4os1
ENSMUSG00000003153	31.6819	-1.66401	0.606864	-2.74199	0.00610684	0.222947	Slc2a3
ENSMUSG00000021567	44.3201	-1.41343	0.515773	-2.74042	0.00613614	0.223146	Nkd2
ENSMUSG00000027827	7.50233	-2.79741	1.02204	-2.73708	0.00619865	0.223711	Kcnab1
ENSMUSG00000061119	4.73807	-3.12344	1.14118	-2.73704	0.00619956	0.223711	Prcp
ENSMUSG00000003665	1.50571	-1.62581	0.595338	-2.7309	0.00631609	0.223975	Has1
ENSMUSG00000026806	1.92956	-2.91828	1.06814	-2.73213	0.00629265	0.223975	Ddx31
ENSMUSG00000027215	36.436	-1.64937	0.604479	-2.72858	0.00636077	0.223975	Cd82
ENSMUSG00000028957	135.146	-0.956633	0.35069	-2.72786	0.00637464	0.223975	Per3
ENSMUSG00000037652	115.243	-0.939391	0.344337	-2.72812	0.00636969	0.223975	Phc3
ENSMUSG00000044026	4.33084	-2.94803	1.07918	-2.73172	0.00630038	0.223975	Slc35g1
ENSMUSG00000079297	3.24019	-2.51683	0.922181	-2.72922	0.00634841	0.223975	Gm2223
ENSMUSG00000020385	69.6379	-1.15176	0.423478	-2.71976	0.00653291	0.225236	Clk4
ENSMUSG00000027849	11.1284	-2.57553	0.952119	-2.70505	0.00682936	0.225236	Syt6
ENSMUSG00000029104	49.7896	-1.19266	0.440574	-2.70705	0.0067885	0.225236	Htt
ENSMUSG00000029472	199.496	-0.748017	0.275344	-2.71666	0.00659441	0.225236	Anapc5
ENSMUSG00000032018	18.4537	-1.95556	0.721387	-2.71084	0.0067114	0.225236	Sc5d
ENSMUSG00000032252	2.64357	2.72117	1.0071	2.70199	0.00689253	0.225236	Glce
ENSMUSG00000034120	81.7514	-0.878509	0.323814	-2.71301	0.00666753	0.225236	Srsf2
ENSMUSG00000036863	11.9454	-2.132	0.788824	-2.70276	0.0068767	0.225236	Syde2
ENSMUSG00000038489	1.62373	1.69573	0.626548	2.70646	0.00680038	0.225236	Polr2l
ENSMUSG00000038910	15.2248	-2.38878	0.882477	-2.7069	0.00679137	0.225236	Plcl2
ENSMUSG00000039542	87.7733	-1.68369	0.623076	-2.70222	0.00688785	0.225236	Ncam1
ENSMUSG00000040651	58.32	-1.08666	0.40148	-2.70664	0.00679686	0.225236	Fam208a
ENSMUSG00000040785	87.8138	-0.898856	0.331351	-2.7127	0.00667378	0.225236	Ttc3
ENSMUSG00000041078	3.73772	-2.65383	0.978266	-2.71279	0.00667186	0.225236	Grid1
ENSMUSG00000049807	27.4877	-1.22985	0.452797	-2.71611	0.00660533	0.225236	Arhgap23
ENSMUSG00000054150	14.5334	-1.79712	0.663269	-2.70949	0.0067386	0.225236	Syne3
ENSMUSG00000059195	3.61853	-0.807054	0.296717	-2.71995	0.00652927	0.225236	Gm12715
ENSMUSG00000071649	12.92	2.06714	0.762629	2.71055	0.00671723	0.225236	B3gat3
ENSMUSG00000095253	7.53156	-2.67892	0.984783	-2.72031	0.00652206	0.225236	Zfp799
ENSMUSG00000095687	3.39158	0.916735	0.337695	2.71469	0.00663387	0.225236	Rnaset2a
ENSMUSG00000025958	31.4281	-1.11562	0.413232	-2.69975	0.00693913	0.225562	Creb1
ENSMUSG00000034765	2.11412	-2.22683	0.825671	-2.69699	0.00699689	0.225562	Dusp5
ENSMUSG00000048583	26.0744	-2.13288	0.790515	-2.69809	0.00697377	0.225562	Igf2
ENSMUSG00000057457	79.8626	-1.55675	0.577238	-2.69689	0.00699904	0.225562	Phex
ENSMUSG00000035597	26.0685	-1.29872	0.482396	-2.69222	0.00709787	0.227961	Prpf39
ENSMUSG00000030096	684.107	-0.678505	0.252409	-2.68812	0.0071856	0.22948	Slc6a6
ENSMUSG00000054843	41.8112	-1.41007	0.524634	-2.68772	0.00719426	0.22948	Atrnl1
ENSMUSG00000001119	220.077	0.731983	0.272943	2.68182	0.00732232	0.23247	Col6a1
ENSMUSG00000024068	8.67672	2.08032	0.776006	2.68081	0.00734446	0.23247	Spast
ENSMUSG00000061950	28.5495	-1.25344	0.467703	-2.67998	0.00736263	0.23247	Ppp4r1
ENSMUSG00000039765	25.5771	-1.48345	0.553812	-2.67861	0.00739287	0.232639	Cc2d2a
ENSMUSG00000022548	34.8155	1.65887	0.619946	2.67583	0.00745446	0.23379	Apod
ENSMUSG00000042254	1.67025	1.32105	0.494716	2.67032	0.00757795	0.236868	Cilp
ENSMUSG00000031634	16.1325	-2.25589	0.845567	-2.66791	0.00763258	0.23778	Ufsp2
ENSMUSG00000070031	3.83238	-1.63313	0.613768	-2.66083	0.00779488	0.24203	Sp140
ENSMUSG00000029004	180.51	-0.650834	0.244803	-2.6586	0.00784668	0.242831	Kmt2e
ENSMUSG00000033540	28.2116	-1.82097	0.685556	-2.65619	0.00790291	0.243764	Idua
ENSMUSG00000037075	49.4716	-1.43747	0.542434	-2.65004	0.00804815	0.247428	Rnf139
ENSMUSG00000034247	3.10959	1.9662	0.743661	2.64394	0.00819466	0.251106	Plekhm1
ENSMUSG00000030726	11.3703	-2.52181	0.956166	-2.63741	0.0083541	0.252242	Pold3
ENSMUSG00000031360	23.1116	1.51102	0.572141	2.64098	0.00826654	0.252242	Ctps2
ENSMUSG00000034973	47.7093	-1.26584	0.479686	-2.63889	0.00831769	0.252242	Dopey1
ENSMUSG00000035992	28.5823	-1.30709	0.495691	-2.6369	0.00836669	0.252242	Fnip1
ENSMUSG00000051323	11.8673	2.47544	0.938718	2.63704	0.0083633	0.252242	Pcdh19
ENSMUSG00000026110	3.61455	-2.6609	1.0111	-2.63169	0.00849622	0.254505	Mgat4a
ENSMUSG00000087502	1.45394	-2.54184	0.965758	-2.63197	0.00848919	0.254505	Gm16091
ENSMUSG00000027660	38.4142	-1.30232	0.495359	-2.62904	0.00856263	0.255675	Skil
ENSMUSG00000006362	8.47199	2.56989	0.97845	2.62649	0.0086271	0.25678	Cbfa2t3
ENSMUSG00000022142	19.8811	-2.07618	0.792208	-2.62074	0.00877379	0.260317	Nup155
ENSMUSG00000026430	7.54881	2.65248	1.01255	2.6196	0.00880326	0.260365	Rassf5
ENSMUSG00000068706	7.67099	0.987981	0.378348	2.6113	0.0090198	0.265928	Gm10250
ENSMUSG00000018171	65.7756	-1.19522	0.458484	-2.60689	0.00913678	0.266288	Vmp1
ENSMUSG00000037103	7.00889	-2.26804	0.870486	-2.60548	0.0091745	0.266288	Dcaf15
ENSMUSG00000041540	19.4277	-1.83342	0.703599	-2.60578	0.00916664	0.266288	Sox5
ENSMUSG00000074238	22.7491	-1.76521	0.676498	-2.60934	0.00907168	0.266288	Ap1ar
ENSMUSG00000103220	10.5394	-2.06535	0.791975	-2.60784	0.00911143	0.266288	Gm37728
ENSMUSG00000021102	13.4861	1.76296	0.677328	2.60282	0.00924601	0.266707	Glrx5
ENSMUSG00000042745	10.4204	-2.57786	0.990196	-2.60339	0.00923072	0.266707	Id1
ENSMUSG00000081306	3.19942	-0.651032	0.25045	-2.59945	0.00933731	0.268512	Gm15266
ENSMUSG00000038085	1.55844	2.32386	0.894756	2.5972	0.00939869	0.269448	Cnbd2
ENSMUSG00000042035	256.777	-0.585382	0.225952	-2.59073	0.00957714	0.273725	Igsf3
ENSMUSG00000028706	19.4583	-1.91872	0.740987	-2.58941	0.00961394	0.273939	Nsun4
ENSMUSG00000038241	31.8374	-1.44448	0.558164	-2.58791	0.00965595	0.274299	Cep250
ENSMUSG00000033444	46.0387	1.10408	0.427761	2.58106	0.00984964	0.275671	Specc1l
ENSMUSG00000035901	53.4289	-0.859551	0.333126	-2.58026	0.00987255	0.275671	Dennd5a
ENSMUSG00000039004	155.883	0.869551	0.336707	2.58252	0.00980823	0.275671	Bmp6
ENSMUSG00000052798	11.1516	2.33681	0.905753	2.57996	0.00988122	0.275671	Nup107
ENSMUSG00000066406	87.5501	-1.00504	0.389264	-2.58189	0.009826	0.275671	Akap13
ENSMUSG00000076258	78.1418	-0.449855	0.174179	-2.58272	0.00980243	0.275671	Gm23935
ENSMUSG00000026674	227.795	-0.605228	0.235055	-2.57484	0.0100287	0.278953	Ddr2
ENSMUSG00000022841	14.4704	-1.06816	0.41536	-2.57165	0.0101216	0.280703	Ap2m1
ENSMUSG00000069565	30.6946	-0.91121	0.354568	-2.56992	0.0101723	0.281272	Dazap1
ENSMUSG00000040462	70.4622	1.04855	0.408185	2.5688	0.0102052	0.281351	Os9
ENSMUSG00000038175	13.828	2.0208	0.788151	2.56397	0.0103481	0.284452	Mylip
ENSMUSG00000021831	8.16523	-2.28809	0.893294	-2.5614	0.010425	0.284731	Ero1l
ENSMUSG00000026193	10.8852	0.969815	0.37845	2.5626	0.0103893	0.284731	Fn1
ENSMUSG00000031668	8.5761	-2.14684	0.83842	-2.56058	0.0104497	0.284731	Eif2ak3
ENSMUSG00000010097	66.8636	-0.821972	0.32222	-2.55097	0.0107424	0.28977	Nxf1
ENSMUSG00000021037	15.3957	1.87687	0.736072	2.54984	0.0107771	0.28977	Ahsa1
ENSMUSG00000031948	19.7316	1.84444	0.723716	2.54857	0.0108167	0.28977	Kars
ENSMUSG00000047888	62.7304	-0.859569	0.337293	-2.54844	0.0108207	0.28977	Tnrc6b
ENSMUSG00000067629	4.10563	-1.60919	0.631337	-2.54887	0.0108074	0.28977	Syngap1
ENSMUSG00000090399	10.874	1.6295	0.638163	2.55343	0.0106668	0.28977	Gm38399
ENSMUSG00000027722	25.2518	-1.64101	0.645024	-2.54411	0.0109558	0.291717	Spata5
ENSMUSG00000085787	2.57682	-1.36785	0.537595	-2.54439	0.010947	0.291717	Gm13092
ENSMUSG00000018334	26.2438	-1.2625	0.497286	-2.53877	0.0111242	0.294525	Ksr1
ENSMUSG00000025656	8.18603	-2.39347	0.942642	-2.53911	0.0111136	0.294525	Arhgef9
ENSMUSG00000004637	19.0708	-1.58552	0.625414	-2.53514	0.0112401	0.296751	Wwox
ENSMUSG00000043633	1.5417	0.969494	0.38259	2.53403	0.0112759	0.296859	Fam221b
ENSMUSG00000020464	13.8666	-1.62519	0.642067	-2.53118	0.011368	0.297144	Pnpt1
ENSMUSG00000031974	2.553	-2.01867	0.797659	-2.53074	0.0113822	0.297144	Abcb10
ENSMUSG00000037331	23.0347	-1.37852	0.544362	-2.53236	0.0113297	0.297144	Larp1
ENSMUSG00000036545	271.265	0.669445	0.264711	2.52897	0.0114398	0.297818	Adamts2
ENSMUSG00000038467	5.27817	1.29972	0.514677	2.52532	0.0115592	0.30009	Chmp4b
ENSMUSG00000038679	55.4501	-1.13818	0.451213	-2.52248	0.011653	0.301686	Trps1
ENSMUSG00000045294	13.3106	-1.81158	0.719179	-2.51896	0.0117703	0.303881	Insig1
ENSMUSG00000031712	17.6788	1.58548	0.630528	2.51453	0.011919	0.306872	Il15
ENSMUSG00000002985	1773.2	0.439407	0.175264	2.50712	0.0121721	0.307602	Apoe
ENSMUSG00000021713	6.12082	-2.20355	0.878975	-2.50695	0.0121777	0.307602	Ppwd1
ENSMUSG00000025437	28.5712	-1.19315	0.475256	-2.51053	0.0120549	0.307602	Usp33
ENSMUSG00000025586	25.3706	-1.56272	0.622485	-2.51045	0.0120577	0.307602	Cpeb1
ENSMUSG00000029823	105.898	-0.771324	0.307464	-2.50866	0.0121189	0.307602	Luc7l2
ENSMUSG00000038844	5.15553	1.95636	0.780182	2.50757	0.0121565	0.307602	Kif16b
ENSMUSG00000042712	23.4116	-1.56455	0.623896	-2.50772	0.0121514	0.307602	Tceal9
ENSMUSG00000060036	32.4272	-0.969353	0.387192	-2.50355	0.0122956	0.30891	Rpl3
ENSMUSG00000103869	6.34252	2.34889	0.937899	2.50442	0.0122654	0.30891	Gm37420
ENSMUSG00000013663	215.772	-0.596147	0.239315	-2.49105	0.0127365	0.314078	Pten
ENSMUSG00000018001	58.6184	-0.916586	0.367237	-2.4959	0.012564	0.314078	Cyth3
ENSMUSG00000025261	197.921	-0.714215	0.286271	-2.49489	0.0125997	0.314078	Huwe1
ENSMUSG00000027667	12.235	-1.8157	0.728749	-2.49153	0.0127195	0.314078	Zfp639
ENSMUSG00000030094	8.79222	-2.15061	0.863212	-2.4914	0.0127242	0.314078	Xpc
ENSMUSG00000057666	2.32248	-1.52294	0.610658	-2.49394	0.0126334	0.314078	Gapdh
ENSMUSG00000099697	24.8269	-1.58065	0.633817	-2.49386	0.0126362	0.314078	Gm37494
ENSMUSG00000038342	58.6093	-1.11397	0.448686	-2.48273	0.0130379	0.320664	Mlxip
ENSMUSG00000036478	43.3745	-1.13659	0.458197	-2.48057	0.0131173	0.320716	Btg1
ENSMUSG00000079012	2.22853	2.04559	0.824876	2.47987	0.013143	0.320716	Serpina3m
ENSMUSG00000106918	12.7592	-1.22716	0.494732	-2.48046	0.0131214	0.320716	Mrpl33
ENSMUSG00000032609	35.7842	-1.44545	0.585169	-2.47014	0.0135061	0.327864	Klhdc8b
ENSMUSG00000096991	7.03956	-2.25303	0.912016	-2.47038	0.0134968	0.327864	Gm26789
ENSMUSG00000044042	9.25561	-1.7319	0.701919	-2.46738	0.0136106	0.329546	Fmn1
ENSMUSG00000010453	61.2437	-0.962509	0.390532	-2.46461	0.0137162	0.330564	Kansl3
ENSMUSG00000029012	15.9254	-1.78636	0.72513	-2.4635	0.0137588	0.330564	Orc5
ENSMUSG00000086228	3.03852	-1.46569	0.594807	-2.46415	0.013734	0.330564	Ubap1l
ENSMUSG00000017831	29.2834	-1.0527	0.427735	-2.46111	0.0138508	0.331922	Rab5a
ENSMUSG00000068196	230.682	-1.04037	0.422921	-2.45997	0.0138949	0.332126	Col8a1
ENSMUSG00000031539	7.24293	2.60387	1.05947	2.45772	0.0139824	0.333366	Ap3m2
ENSMUSG00000026723	4.84459	-2.38282	0.971722	-2.45217	0.0141999	0.334288	Trdmt1
ENSMUSG00000026750	16.5655	1.31741	0.537202	2.45235	0.0141926	0.334288	Psmb7
ENSMUSG00000029673	50.682	-0.788474	0.321391	-2.45332	0.0141544	0.334288	Auts2
ENSMUSG00000034707	102.484	-0.650929	0.265109	-2.45532	0.0140758	0.334288	Gns
ENSMUSG00000048402	3.27283	2.06114	0.83978	2.45438	0.0141128	0.334288	Gli2
ENSMUSG00000003778	82.3307	-0.862009	0.352913	-2.44255	0.0145838	0.342462	Brd8
ENSMUSG00000097147	3.12105	-2.51812	1.03171	-2.44072	0.0146582	0.343346	Gm26780
ENSMUSG00000038156	86.9392	-1.06723	0.437475	-2.43951	0.0147071	0.343631	Spon1
ENSMUSG00000032727	34.2715	-1.4944	0.613022	-2.43775	0.014779	0.343754	Mier3
ENSMUSG00000037375	17.7442	-1.9844	0.814084	-2.43758	0.0147859	0.343754	Hhat
ENSMUSG00000027678	33.2716	-0.990327	0.406668	-2.43522	0.0148827	0.344292	Ncoa3
ENSMUSG00000036932	5.14415	-2.3186	0.951814	-2.43598	0.0148516	0.344292	Aifm1
ENSMUSG00000039908	6.91406	2.46073	1.01104	2.43386	0.0149386	0.344732	Slc26a11
ENSMUSG00000000628	3.24928	-2.18886	0.904859	-2.41901	0.0155628	0.353647	Hk2
ENSMUSG00000001441	19.1816	-1.2241	0.506537	-2.41662	0.0156655	0.353647	Npepps
ENSMUSG00000006740	44.9512	-1.11965	0.462663	-2.42002	0.0155197	0.353647	Kif5b
ENSMUSG00000020264	62.5213	-1.64391	0.680158	-2.41695	0.0156512	0.353647	Slc36a2
ENSMUSG00000020305	15.0668	-1.61083	0.665567	-2.42024	0.0155104	0.353647	Asb3
ENSMUSG00000020859	115.051	-0.744702	0.307564	-2.42129	0.0154655	0.353647	Spag9
ENSMUSG00000029016	13.432	-1.95465	0.807525	-2.42054	0.0154974	0.353647	Clcn6
ENSMUSG00000031161	6.95399	-2.66649	1.10169	-2.42037	0.0155047	0.353647	Hdac6
ENSMUSG00000034723	20.8431	-1.81141	0.749309	-2.41744	0.0156299	0.353647	Tmx4
ENSMUSG00000106671	7.73745	-1.77078	0.733508	-2.41412	0.0157732	0.355221	Gm42900
ENSMUSG00000022961	438.561	-0.472241	0.195791	-2.41196	0.0158668	0.356469	Son
ENSMUSG00000038481	14.1061	1.61081	0.668531	2.40948	0.0159752	0.358043	Cdk19
ENSMUSG00000021665	20.6265	-1.56769	0.652027	-2.40433	0.0162022	0.35883	Hexb
ENSMUSG00000024014	5.97842	-1.80849	0.751766	-2.40565	0.0161437	0.35883	Pim1
ENSMUSG00000029304	1418.49	-0.77276	0.321313	-2.40501	0.0161721	0.35883	Spp1
ENSMUSG00000042379	503.267	0.634976	0.264045	2.40481	0.016181	0.35883	Esm1
ENSMUSG00000048271	51.183	-1.10358	0.458546	-2.40669	0.0160979	0.35883	Rbm33
ENSMUSG00000028582	9.3437	-2.02494	0.842597	-2.40321	0.0162518	0.359076	Cc2d1b
ENSMUSG00000032308	6.58718	-1.81131	0.755079	-2.39883	0.0164473	0.36254	Ulk3
ENSMUSG00000089855	5.06817	-0.641144	0.267621	-2.39572	0.0165878	0.364775	Gm15662
ENSMUSG00000034621	46.1082	-0.943306	0.394192	-2.39301	0.0167106	0.366614	Gpatch8
ENSMUSG00000021650	7.67321	2.27691	0.952291	2.39098	0.0168034	0.367786	Ptcd2
ENSMUSG00000006732	6.72264	-1.79194	0.750239	-2.38849	0.0169177	0.368064	Mettl1
ENSMUSG00000029101	5.31419	-1.97274	0.826059	-2.38813	0.0169342	0.368064	Rgs12
ENSMUSG00000064351	317.26	-0.433005	0.181299	-2.38834	0.0169245	0.368064	mt-Co1
ENSMUSG00000012076	13.7845	2.15389	0.903586	2.38371	0.0171391	0.370555	Brms1l
ENSMUSG00000022995	104.99	-0.82521	0.346646	-2.38056	0.0172865	0.370555	Enah
ENSMUSG00000027875	30.5735	-1.92525	0.808519	-2.3812	0.0172562	0.370555	Hmgcs2
ENSMUSG00000033538	20.4004	-1.61018	0.676462	-2.38029	0.017299	0.370555	Casp4
ENSMUSG00000039682	10.7342	-2.09627	0.880893	-2.37971	0.0173264	0.370555	Lap3
ENSMUSG00000047126	83.3283	-0.839807	0.352617	-2.38164	0.0172358	0.370555	Cltc
ENSMUSG00000085687	6.02973	-2.22823	0.935241	-2.38251	0.0171948	0.370555	Gm16153
ENSMUSG00000021254	6.2183	-1.8366	0.772749	-2.3767	0.0174682	0.370817	Gpatch2l
ENSMUSG00000028599	49.3357	-1.10558	0.464857	-2.37833	0.0173912	0.370817	Tnfrsf1b
ENSMUSG00000035441	13.0499	-1.51821	0.638954	-2.37609	0.0174973	0.370817	Myo1d
ENSMUSG00000073096	2.94143	-2.46792	1.03836	-2.37675	0.0174657	0.370817	Lrrc61
ENSMUSG00000018501	105.925	-0.583231	0.245631	-2.37442	0.0175768	0.371657	Ncor1
ENSMUSG00000017713	5.74959	-2.61281	1.10185	-2.3713	0.0177255	0.373115	Tha1
ENSMUSG00000038612	66.6859	-0.985362	0.415401	-2.37207	0.0176886	0.373115	Mcl1
ENSMUSG00000054252	50.2142	-1.52495	0.643802	-2.36866	0.0178527	0.374946	Fgfr3
ENSMUSG00000047996	13.8414	-2.16243	0.913587	-2.36697	0.0179345	0.375495	Prrg1
ENSMUSG00000050315	50.1579	-1.67338	0.707122	-2.36646	0.0179591	0.375495	Synpo2
ENSMUSG00000039234	38.5447	-0.943918	0.399344	-2.36367	0.0180949	0.377488	Sec24d
ENSMUSG00000027253	63.919	-1.33726	0.566103	-2.36222	0.0181659	0.378126	Lrp4
ENSMUSG00000028820	118.546	-0.616336	0.261133	-2.36024	0.0182631	0.378464	Sfpq
ENSMUSG00000040594	16.9805	-1.75338	0.742802	-2.36049	0.0182506	0.378464	Ranbp17
ENSMUSG00000020427	81.3829	1.35159	0.572988	2.35884	0.0183319	0.379049	Igfbp3
ENSMUSG00000036552	6.21614	-1.75928	0.746374	-2.3571	0.0184185	0.379998	Ermard
ENSMUSG00000038253	8.72316	-1.48899	0.632127	-2.35552	0.0184969	0.380776	Hoxa5
ENSMUSG00000029090	22.9854	1.24379	0.528479	2.35353	0.0185961	0.381977	Adgra3
ENSMUSG00000020114	25.1431	-1.33557	0.568611	-2.34882	0.0188328	0.38599	Cand1
ENSMUSG00000093559	8.85124	-2.15717	0.919511	-2.346	0.018976	0.388073	Gm20705
ENSMUSG00000004789	53.4015	-1.26716	0.540759	-2.34331	0.0191136	0.389952	Dlst
ENSMUSG00000019715	11.7956	2.22661	0.950826	2.34176	0.019193	0.389952	Gle1
ENSMUSG00000019943	116.967	-0.703834	0.300455	-2.34256	0.019152	0.389952	Atp2b1
ENSMUSG00000062329	2.77621	1.20733	0.515774	2.34082	0.0192415	0.390089	Cytl1
ENSMUSG00000040591	16.2236	-1.77372	0.759353	-2.33584	0.0194998	0.394471	1110051M20Rik
ENSMUSG00000051674	11.221	1.9915	0.853522	2.33327	0.019634	0.39571	Dcun1d4
ENSMUSG00000071862	4.20527	-2.42376	1.03888	-2.33304	0.0196458	0.39571	Lrrtm2
ENSMUSG00000039523	7.12896	-2.04899	0.878815	-2.33153	0.0197252	0.396456	Cep104
ENSMUSG00000011171	17.3535	2.14759	0.922027	2.3292	0.0198484	0.396466	Vipr2
ENSMUSG00000026721	85.3413	-0.917929	0.394175	-2.32873	0.0198733	0.396466	Rabgap1l
ENSMUSG00000039450	6.41435	2.45199	1.05312	2.32831	0.0198954	0.396466	Dcxr
ENSMUSG00000054737	15.4023	-1.8359	0.788272	-2.32902	0.0198579	0.396466	Zfp182
ENSMUSG00000024483	60.4748	-0.991818	0.426891	-2.32335	0.0201603	0.400891	Ankhd1
ENSMUSG00000021022	2.03559	-2.40184	1.03535	-2.31983	0.0203502	0.401679	Ppp2r3c
ENSMUSG00000022483	5.00645	1.67952	0.723814	2.32037	0.0203207	0.401679	Col2a1
ENSMUSG00000066571	28.2784	-1.0579	0.455711	-2.32142	0.020264	0.401679	4931406P16Rik
ENSMUSG00000104963	3.54359	-1.48015	0.638152	-2.31943	0.0203719	0.401679	Gm42974
ENSMUSG00000097971	1670.13	-0.505533	0.21841	-2.31461	0.0206344	0.405998	Gm26917
ENSMUSG00000034591	18.4549	-1.42762	0.617103	-2.31343	0.0206993	0.406419	Slc41a2
ENSMUSG00000034786	3.95595	-1.96964	0.852538	-2.31033	0.0208699	0.40891	Gpsm3
ENSMUSG00000024563	30.7764	-1.2057	0.522986	-2.30541	0.0211435	0.413403	Smad2
ENSMUSG00000016918	74.493	1.07316	0.465831	2.30376	0.0212362	0.414349	Sulf1
ENSMUSG00000085342	1.69001	0.84286	0.366386	2.30047	0.0214215	0.417095	Gm12254
ENSMUSG00000060798	2.70795	-2.30337	1.00191	-2.29897	0.0215067	0.417882	Intu
ENSMUSG00000024240	33.5776	-1.08488	0.472809	-2.29454	0.0217595	0.421044	Epc1
ENSMUSG00000085314	2.36989	-2.38663	1.0398	-2.29529	0.0217165	0.421044	Gm14866
ENSMUSG00000044167	19.3344	-1.3999	0.611352	-2.28985	0.02203	0.424521	Foxo1
ENSMUSG00000063652	8.82755	-1.75192	0.764963	-2.2902	0.0220098	0.424521	Slc22a21
ENSMUSG00000034429	1.54647	2.54969	1.11386	2.28906	0.022076	0.424531	Zfp707
ENSMUSG00000020241	142.847	0.736473	0.322338	2.28478	0.0223256	0.425827	Col6a2
ENSMUSG00000028649	287.108	-0.552937	0.241986	-2.28499	0.0223132	0.425827	Macf1
ENSMUSG00000039929	23.4127	-1.87718	0.82084	-2.2869	0.0222014	0.425827	Urb1
ENSMUSG00000063663	9.29255	-1.78392	0.780781	-2.28479	0.0223254	0.425827	Brwd3
ENSMUSG00000022914	103.684	-0.843885	0.370001	-2.28076	0.0225625	0.427727	Brwd1
ENSMUSG00000025499	14.6086	1.81423	0.795327	2.28111	0.0225421	0.427727	Hras
ENSMUSG00000049690	6.06568	-2.27998	0.999398	-2.28135	0.0225275	0.427727	Nckap5
ENSMUSG00000060275	13.3671	-1.47119	0.645496	-2.27916	0.0226573	0.428654	Nrg2
ENSMUSG00000059669	11.3128	-1.66914	0.732829	-2.27767	0.0227464	0.429471	Taf1b
ENSMUSG00000024855	13.7105	1.72643	0.758698	2.27551	0.0228753	0.430165	Pacs1
ENSMUSG00000081769	24.2667	-1.51026	0.663575	-2.27595	0.022849	0.430165	Gm12216
ENSMUSG00000027284	11.5208	-1.59256	0.700373	-2.27388	0.0229732	0.431139	Cdan1
ENSMUSG00000016024	230.813	0.830986	0.366527	2.26719	0.0233788	0.43439	Lbp
ENSMUSG00000025283	51.2632	-1.00816	0.444432	-2.26841	0.0233041	0.43439	Sat1
ENSMUSG00000030301	6.19364	2.15466	0.949207	2.26996	0.0232098	0.43439	Ccdc91
ENSMUSG00000037936	18.5291	-1.51001	0.665899	-2.26763	0.0233516	0.43439	Scarb1
ENSMUSG00000055172	115.753	0.574045	0.25308	2.26824	0.0233146	0.43439	C1ra
ENSMUSG00000000056	7.79718	-2.02318	0.892949	-2.26573	0.0234682	0.435185	Narf
ENSMUSG00000026977	52.9512	-0.994421	0.439636	-2.26192	0.0237023	0.438657	Marchf7
ENSMUSG00000027340	41.7152	-1.26409	0.559487	-2.25937	0.0238603	0.438748	Slc23a2
ENSMUSG00000028990	9.24017	2.02327	0.895503	2.25936	0.0238607	0.438748	Lzic
ENSMUSG00000035890	5.32702	1.89836	0.840424	2.25881	0.023895	0.438748	Rnf126
ENSMUSG00000037750	7.57957	1.67844	0.742775	2.25969	0.0238403	0.438748	Fam222b
ENSMUSG00000042292	8.63781	1.56431	0.692953	2.25745	0.0239798	0.439442	Mkl1
ENSMUSG00000038418	428.382	-1.26217	0.560214	-2.25302	0.0242581	0.443672	Egr1
ENSMUSG00000022811	33.9894	-1.06607	0.473842	-2.24985	0.0244587	0.445596	Zfp148
ENSMUSG00000023909	3.27602	-2.30852	1.02597	-2.25009	0.0244432	0.445596	Paqr4
ENSMUSG00000057637	32.9304	-1.04928	0.466979	-2.24696	0.0246428	0.448076	Prdm2
ENSMUSG00000000532	22.8835	-1.22834	0.54718	-2.24485	0.0247776	0.448782	Acvr1b
ENSMUSG00000002771	1.62166	-2.14744	0.95656	-2.24496	0.0247709	0.448782	Grin2d
ENSMUSG00000020473	10.324	-1.39451	0.622675	-2.23954	0.0251205	0.450626	Aebp1
ENSMUSG00000021048	3.98234	1.95235	0.871279	2.24078	0.0250402	0.450626	Mthfd1
ENSMUSG00000028809	99.6581	-0.635391	0.283659	-2.23998	0.025092	0.450626	Srrm1
ENSMUSG00000036199	24.5949	0.953876	0.425622	2.24113	0.0250174	0.450626	Ndufa13
ENSMUSG00000041112	54.4256	-1.27053	0.566866	-2.24133	0.0250047	0.450626	Elmo1
ENSMUSG00000056501	45.288	-1.12413	0.502358	-2.2377	0.0252406	0.451914	Cebpb
ENSMUSG00000024238	36.3748	-1.15049	0.514508	-2.23609	0.0253458	0.452928	Zeb1
ENSMUSG00000030232	18.2525	1.31066	0.5866	2.23434	0.025461	0.454119	Aebp2
ENSMUSG00000037239	4.52957	-2.4841	1.11359	-2.23072	0.0256996	0.457503	Spred3
ENSMUSG00000057990	2.17412	-1.8317	0.822255	-2.22765	0.0259036	0.460257	E030024N20Rik
ENSMUSG00000022749	17.453	1.23318	0.55398	2.22604	0.0260116	0.461299	Tbc1d23
ENSMUSG00000037664	17.8762	-1.41195	0.635677	-2.22118	0.0263385	0.466212	Cdkn1c
ENSMUSG00000020740	21.2062	1.29097	0.581641	2.21954	0.02645	0.466419	Gga3
ENSMUSG00000092998	60.2345	-0.587543	0.26466	-2.21999	0.0264192	0.466419	Mir5099
ENSMUSG00000032440	44.7111	-1.2037	0.543088	-2.21639	0.0266647	0.469318	Tgfbr2
ENSMUSG00000027907	18.433	0.521371	0.23543	2.21455	0.0267909	0.470315	S100a11
ENSMUSG00000095123	29.5576	-1.96427	0.887164	-2.2141	0.026822	0.470315	Gm21781
ENSMUSG00000021830	9.79935	-2.00523	0.906194	-2.21281	0.026911	0.470993	Txndc16
ENSMUSG00000040850	55.6514	-0.866233	0.391781	-2.21101	0.0270351	0.47228	Psme4
ENSMUSG00000031880	8.8712	-2.15931	0.978593	-2.20654	0.027346	0.475932	Rrad
ENSMUSG00000062604	34.9059	-1.03397	0.468441	-2.20726	0.0272956	0.475932	Srpk2
ENSMUSG00000005566	24.3919	-1.23104	0.558901	-2.20261	0.0276225	0.476484	Trim28
ENSMUSG00000005621	41.6711	-1.27781	0.581571	-2.19717	0.0280083	0.476484	Zfp592
ENSMUSG00000007880	73.2844	-0.661552	0.300223	-2.20354	0.0275569	0.476484	Arid1a
ENSMUSG00000021514	11.2537	-1.80974	0.822402	-2.20056	0.0277674	0.476484	Zfp369
ENSMUSG00000021840	12.7469	-1.31001	0.594992	-2.20172	0.0276849	0.476484	Mapk1ip1l
ENSMUSG00000022555	22.4125	-1.31859	0.598706	-2.20239	0.0276375	0.476484	Dgat1
ENSMUSG00000028879	28.0474	1.33786	0.609226	2.19601	0.0280915	0.476484	Stx12
ENSMUSG00000031729	58.3151	-0.916564	0.417306	-2.19638	0.0280645	0.476484	Ist1
ENSMUSG00000034848	5.71406	2.01331	0.913125	2.20486	0.0274643	0.476484	Ttc21b
ENSMUSG00000040524	13.358	-1.31934	0.600237	-2.19803	0.0279469	0.476484	Zfp609
ENSMUSG00000040782	25.9033	-1.00009	0.455081	-2.1976	0.0279775	0.476484	Cop1
ENSMUSG00000052299	32.944	-1.26497	0.57397	-2.2039	0.0275315	0.476484	Ltn1
ENSMUSG00000057409	9.32467	-1.82316	0.829354	-2.19829	0.0279282	0.476484	Zfp53
ENSMUSG00000061897	1.90043	-1.6147	0.733948	-2.20003	0.0278051	0.476484	Gm14292
ENSMUSG00000030452	12.4224	-1.41825	0.646384	-2.19413	0.0282263	0.477863	Nipa2
ENSMUSG00000047407	4.16939	-1.87023	0.852642	-2.19345	0.028275	0.477863	Tgif1
ENSMUSG00000024516	18.6213	1.49366	0.681822	2.19068	0.0284747	0.48037	Sec11c
ENSMUSG00000020387	40.7793	-1.13827	0.520754	-2.18581	0.0288295	0.485478	Jade2
ENSMUSG00000063895	7.57391	1.71787	0.786478	2.18426	0.028943	0.486514	Nupl1
ENSMUSG00000027848	436.037	-0.735765	0.337102	-2.18262	0.0290639	0.486795	Olfml3
ENSMUSG00000029469	12.084	-1.7942	0.822026	-2.18265	0.0290616	0.486795	Ift81
ENSMUSG00000005514	67.43	-1.07361	0.492226	-2.18114	0.0291734	0.487221	Por
ENSMUSG00000026469	12.5307	1.65652	0.75957	2.18086	0.0291936	0.487221	Xpr1
ENSMUSG00000022604	5.13484	-2.06945	0.949713	-2.17903	0.0293298	0.487876	Cep97
ENSMUSG00000028796	32.5078	-0.963971	0.442425	-2.17883	0.029344	0.487876	Phc2
ENSMUSG00000035835	25.3131	-1.10793	0.508793	-2.17756	0.0294389	0.487876	Plppr3
ENSMUSG00000038264	59.358	-1.05987	0.486732	-2.17752	0.0294417	0.487876	Sema7a
ENSMUSG00000009585	27.1828	-1.38915	0.638728	-2.17487	0.02964	0.490293	Apobec3
ENSMUSG00000005312	30.1591	1.04841	0.482716	2.1719	0.0298632	0.492264	Ubqln1
ENSMUSG00000031577	3.29759	-2.01427	0.927638	-2.17139	0.0299015	0.492264	Tti2
ENSMUSG00000064370	1432.83	-0.433236	0.199539	-2.17119	0.0299172	0.492264	mt-Cytb
ENSMUSG00000028124	10.6464	-1.54798	0.713218	-2.17042	0.0299752	0.492353	Gclm
ENSMUSG00000028945	34.4248	1.05164	0.485454	2.1663	0.0302881	0.493061	Rheb
ENSMUSG00000030539	17.9419	-1.34833	0.622103	-2.16737	0.0302063	0.493061	Sema4b
ENSMUSG00000031903	21.0109	1.59564	0.736554	2.16636	0.0302834	0.493061	Pla2g15
ENSMUSG00000038024	30.0489	-1.17186	0.541245	-2.16511	0.0303792	0.493061	Dennd4c
ENSMUSG00000044617	7.92365	-2.16866	1.00169	-2.165	0.0303877	0.493061	Zbtb39
ENSMUSG00000063884	15.6661	-1.46938	0.677964	-2.16734	0.0302091	0.493061	Ptcd3
ENSMUSG00000078238	3.71977	0.581973	0.268394	2.16836	0.0301316	0.493061	Gm12854
ENSMUSG00000000711	3.52002	1.31723	0.610735	2.1568	0.0310214	0.493911	Rab5b
ENSMUSG00000002718	16.2974	-1.37923	0.638673	-2.15952	0.0308097	0.493911	Cse1l
ENSMUSG00000005034	31.933	-1.18577	0.548378	-2.16232	0.0305933	0.493911	Prkacb
ENSMUSG00000021843	35.4146	-0.932496	0.431058	-2.16327	0.0305203	0.493911	Ktn1
ENSMUSG00000025790	24.7722	1.28277	0.593554	2.16116	0.030683	0.493911	Slco3a1
ENSMUSG00000028032	26.6081	1.52616	0.707179	2.15809	0.0309207	0.493911	Papss1
ENSMUSG00000028134	31.1713	-1.03618	0.480046	-2.1585	0.0308893	0.493911	Ptbp2
ENSMUSG00000048000	34.6649	-1.1605	0.537126	-2.16057	0.0307288	0.493911	Gigyf2
ENSMUSG00000049106	20.6996	-1.54308	0.714961	-2.15827	0.0309069	0.493911	Dcaf5
ENSMUSG00000053332	50.8661	-0.862602	0.399397	-2.15976	0.0307912	0.493911	Gas5
ENSMUSG00000063972	7.96783	1.85569	0.860176	2.15734	0.0309792	0.493911	Nr6a1
ENSMUSG00000002897	27.1744	-1.16624	0.542108	-2.15131	0.0314518	0.494396	Il17ra
ENSMUSG00000003134	3.38235	-2.27587	1.05936	-2.14834	0.0316866	0.494396	Tbc1d8
ENSMUSG00000005873	44.5699	0.820513	0.381896	2.14853	0.0316719	0.494396	Reep5
ENSMUSG00000022673	7.23348	-1.90436	0.88517	-2.15141	0.0314439	0.494396	Mcm4
ENSMUSG00000029427	25.3499	-1.31888	0.61332	-2.15039	0.0315242	0.494396	Zcchc8
ENSMUSG00000032405	30.058	1.15563	0.537766	2.14895	0.0316385	0.494396	Pias1
ENSMUSG00000035649	66.2046	-0.934561	0.433771	-2.1545	0.0312007	0.494396	Zcchc7
ENSMUSG00000042333	4.90896	-2.17387	1.00907	-2.15433	0.0312139	0.494396	Tnfrsf14
ENSMUSG00000046324	51.5716	-1.05132	0.488662	-2.15143	0.0314426	0.494396	Ermp1
ENSMUSG00000060591	43.2222	0.601853	0.279193	2.15568	0.0311083	0.494396	Ifitm2
ENSMUSG00000067203	2.025	-1.23628	0.574943	-2.15026	0.0315347	0.494396	H2-K2
ENSMUSG00000067780	23.2942	-1.72762	0.80395	-2.14892	0.031641	0.494396	Pi15
ENSMUSG00000098178	105.578	-0.437886	0.204052	-2.14595	0.0318767	0.496533	Gm42418
ENSMUSG00000020228	7.68525	-2.05565	0.959303	-2.14286	0.0321245	0.499559	Helb
ENSMUSG00000032802	7.66802	1.46682	0.684839	2.14185	0.0322053	0.499985	Srxn1
ENSMUSG00000004880	15.7458	-1.37063	0.641886	-2.13531	0.0327356	0.500488	Lbr
ENSMUSG00000005043	7.45569	1.65367	0.772579	2.14046	0.0323179	0.500488	Sgsh
ENSMUSG00000022858	29.7645	-0.801375	0.374917	-2.13748	0.0325594	0.500488	Tra2b
ENSMUSG00000028088	9.31625	-1.72023	0.805482	-2.13565	0.0327078	0.500488	Fmo5
ENSMUSG00000039630	70.0846	-0.753536	0.352967	-2.13486	0.0327725	0.500488	Hnrnpu
ENSMUSG00000041734	115.062	-0.568584	0.265828	-2.13892	0.0324424	0.500488	Kirrel
ENSMUSG00000057738	68.8046	-0.862227	0.403742	-2.13559	0.0327131	0.500488	Sptan1
ENSMUSG00000061589	20.9692	-1.1995	0.561868	-2.13485	0.0327732	0.500488	Dot1l
ENSMUSG00000078670	37.6096	1.52683	0.71479	2.13606	0.0326748	0.500488	Fam174b
ENSMUSG00000096780	2.82327	1.34689	0.629526	2.13952	0.0323934	0.500488	Tmem181b-ps
ENSMUSG00000034055	13.3872	-1.57206	0.737221	-2.13241	0.0329729	0.502716	Phka1
ENSMUSG00000019961	32.0314	-1.2487	0.587058	-2.12705	0.0334158	0.507326	Tmpo
ENSMUSG00000029714	30.2175	-1.02819	0.48345	-2.12678	0.0334382	0.507326	Gigyf1
ENSMUSG00000035168	42.1169	-1.08015	0.507685	-2.1276	0.0333704	0.507326	Tanc1
ENSMUSG00000015766	13.2927	-1.48659	0.699911	-2.12398	0.0336721	0.510048	Eps8
ENSMUSG00000038518	26.6793	-1.06924	0.503676	-2.12287	0.0337648	0.510624	Jarid2
ENSMUSG00000046230	12.4542	-1.35683	0.639561	-2.1215	0.0338798	0.511194	Vps13a
ENSMUSG00000059447	13.23	-1.11871	0.527417	-2.12112	0.0339119	0.511194	Hadhb
ENSMUSG00000026880	3.27883	-2.17425	1.02542	-2.12036	0.0339755	0.511329	Stom
ENSMUSG00000028634	40.5348	-1.18997	0.562588	-2.11517	0.0344154	0.515481	Hivep3
ENSMUSG00000031216	13.9374	1.54853	0.732218	2.11485	0.034443	0.515481	Stard8
ENSMUSG00000037805	9.30695	-0.825857	0.390352	-2.11567	0.0343726	0.515481	Rpl10a
ENSMUSG00000079065	15.8774	1.59027	0.752077	2.11451	0.034472	0.515481	BC005561
ENSMUSG00000098470	2.13125	0.739533	0.350077	2.11248	0.034645	0.517239	C1rb
ENSMUSG00000019433	5.6262	2.22351	1.05398	2.10963	0.0348901	0.51924	Gipc1
ENSMUSG00000031465	28.0021	-1.44966	0.686986	-2.11018	0.0348429	0.51924	Angpt2
ENSMUSG00000013646	4.06019	2.38658	1.13359	2.10532	0.0352632	0.519827	Sh3bp5l
ENSMUSG00000030861	37.1425	-1.15376	0.547218	-2.1084	0.0349962	0.519827	Acadsb
ENSMUSG00000032097	75.747	-0.664083	0.315244	-2.10656	0.0351553	0.519827	Ddx6
ENSMUSG00000040795	8.37539	-1.999	0.949353	-2.10565	0.035235	0.519827	Iqcc
ENSMUSG00000046372	1.47113	1.12767	0.535433	2.10609	0.0351966	0.519827	Gm5590
ENSMUSG00000063628	2.66419	0.678366	0.322095	2.1061	0.0351955	0.519827	Gm7665
ENSMUSG00000023007	17.4775	-1.31609	0.625493	-2.10408	0.0353711	0.519972	Prpf40b
ENSMUSG00000061028	8.42374	-1.3498	0.641559	-2.10393	0.0353844	0.519972	Clasrp
ENSMUSG00000014846	2.64413	-1.94927	0.927408	-2.10185	0.0355666	0.521023	Tppp3
ENSMUSG00000069520	30.4391	1.20221	0.571981	2.10184	0.0355674	0.521023	Tmem19
ENSMUSG00000007613	20.7329	-1.49071	0.710218	-2.09895	0.0358213	0.521494	Tgfbr1
ENSMUSG00000019951	27.2174	1.36805	0.651886	2.0986	0.0358518	0.521494	Uhrf1bp1l
ENSMUSG00000058152	5.88288	-1.87327	0.892757	-2.0983	0.0358785	0.521494	Chsy3
ENSMUSG00000064363	159.378	-0.478014	0.227707	-2.09925	0.0357952	0.521494	mt-Nd4
ENSMUSG00000074733	44.3559	-1.04956	0.499937	-2.09939	0.0357827	0.521494	Zfp950
ENSMUSG00000024006	61.1185	-0.928157	0.443034	-2.095	0.036171	0.522896	Stk38
ENSMUSG00000031654	24.1264	1.33966	0.639427	2.0951	0.0361621	0.522896	Cbln1
ENSMUSG00000035493	4.36577	1.9766	0.942964	2.09615	0.0360686	0.522896	Tgfbi
ENSMUSG00000091509	3.39494	-1.50993	0.720836	-2.09469	0.0361987	0.522896	Gm17066
ENSMUSG00000022307	34.6638	-1.12236	0.536042	-2.09378	0.0362795	0.523254	Oxr1
ENSMUSG00000038274	2.69472	-1.27208	0.607983	-2.09229	0.0364126	0.523557	Fau
ENSMUSG00000060548	198.318	-0.668767	0.31962	-2.09238	0.0364045	0.523557	Tnfrsf19
ENSMUSG00000027940	29.6033	-0.805874	0.385437	-2.09081	0.0365454	0.524083	Tpm3
ENSMUSG00000038056	87.6929	-0.679722	0.325128	-2.09063	0.0365613	0.524083	Kmt2c
ENSMUSG00000002602	46.7571	-1.08414	0.518978	-2.08899	0.0367083	0.525383	Axl
ENSMUSG00000027274	12.2403	-1.86668	0.894009	-2.08799	0.036799	0.525827	Mkks
ENSMUSG00000027363	23.3745	0.985255	0.47227	2.08621	0.0369593	0.525827	Usp8
ENSMUSG00000029202	69.2447	-0.853767	0.409253	-2.08616	0.0369643	0.525827	Pds5a
ENSMUSG00000067235	103.605	-0.794995	0.381009	-2.08655	0.0369286	0.525827	H2-Q10
ENSMUSG00000048537	14.7171	-1.26123	0.604787	-2.08542	0.0370315	0.525983	Phldb1
ENSMUSG00000013089	4.02671	-1.97885	0.95	-2.083	0.037251	0.527211	Etv5
ENSMUSG00000029650	6.5996	2.06463	0.99137	2.08261	0.0372872	0.527211	Slc46a3
ENSMUSG00000034708	167.43	0.60555	0.290742	2.08278	0.0372713	0.527211	Grn
ENSMUSG00000021112	2.28035	2.03189	0.978084	2.07742	0.0377628	0.528341	Mpp5
ENSMUSG00000021969	35.4417	-0.915132	0.440385	-2.07803	0.0377068	0.528341	Zdhhc20
ENSMUSG00000023018	23.3839	-1.29216	0.621467	-2.07921	0.0375982	0.528341	Smarcd1
ENSMUSG00000024018	2.07178	-2.22847	1.07095	-2.08084	0.0374486	0.528341	Ccdc167
ENSMUSG00000027346	18.3435	-1.37014	0.659258	-2.07831	0.037681	0.528341	Gpcpd1
ENSMUSG00000045005	99.4009	-0.613817	0.295146	-2.07971	0.0375525	0.528341	Fzd5
ENSMUSG00000079442	69.0478	-1.09284	0.526001	-2.07763	0.0377431	0.528341	St6galnac4
ENSMUSG00000022419	53.0146	-1.07175	0.516415	-2.07537	0.037952	0.528612	Deptor
ENSMUSG00000037902	1.52234	1.99838	0.962731	2.07575	0.0379175	0.528612	Sirpa
ENSMUSG00000044783	64.2493	-0.947846	0.456469	-2.07647	0.0378501	0.528612	Hjurp
ENSMUSG00000004267	2.77147	-2.19293	1.05873	-2.07128	0.0383324	0.529963	Eno2
ENSMUSG00000041841	3.68653	-0.758419	0.365991	-2.07223	0.0382437	0.529963	Rpl37
ENSMUSG00000056185	4.76045	-1.89349	0.913402	-2.07301	0.0381717	0.529963	Snx32
ENSMUSG00000058013	194.881	-0.606552	0.292626	-2.07279	0.0381922	0.529963	Sept11
ENSMUSG00000103593	62.5822	-1.1626	0.56116	-2.07178	0.0382864	0.529963	Gm37352
ENSMUSG00000045763	6.09277	1.37703	0.665744	2.06841	0.0386011	0.532889	Basp1
ENSMUSG00000063888	19.1947	1.25568	0.607373	2.06739	0.0386978	0.533436	Rpl7l1
ENSMUSG00000015087	21.7554	1.08396	0.524864	2.06522	0.0389017	0.534826	Rabl6
ENSMUSG00000020459	5.45852	-1.82588	0.884157	-2.06511	0.0389131	0.534826	Mtif2
ENSMUSG00000057863	1.40817	-1.87958	0.910529	-2.06427	0.0389921	0.535125	Rpl36
ENSMUSG00000020359	26.8137	-1.42807	0.692324	-2.06272	0.0391394	0.536359	Phykpl
ENSMUSG00000041763	48.5349	-0.928124	0.450314	-2.06106	0.0392975	0.537737	Tpp2
ENSMUSG00000019066	7.22882	-1.90432	0.925185	-2.05831	0.0395606	0.537948	Rab3d
ENSMUSG00000031925	11.6437	1.25439	0.60955	2.05789	0.0396007	0.537948	Maml2
ENSMUSG00000034858	17.1869	-1.34291	0.652322	-2.05866	0.0395271	0.537948	Fam214a
ENSMUSG00000053819	60.8532	-0.829022	0.402691	-2.0587	0.0395226	0.537948	Camk2d
ENSMUSG00000067931	6.56979	-1.64485	0.799257	-2.05797	0.0395927	0.537948	Zfp948
ENSMUSG00000026207	67.8141	-0.629551	0.306506	-2.05396	0.0399795	0.539955	Speg
ENSMUSG00000026219	86.794	-0.671713	0.326945	-2.05452	0.0399258	0.539955	Trip12
ENSMUSG00000027639	165.877	0.588264	0.286189	2.05551	0.0398299	0.539955	Samhd1
ENSMUSG00000034258	2.56611	1.90978	0.929529	2.05457	0.0399206	0.539955	Flvcr2
ENSMUSG00000002265	6.09649	2.02128	0.986824	2.04827	0.0405336	0.541567	Peg3
ENSMUSG00000014850	19.6061	-1.66394	0.812331	-2.04835	0.0405261	0.541567	Msh3
ENSMUSG00000019899	85.6518	-1.12241	0.548949	-2.04466	0.0408886	0.541567	Lama2
ENSMUSG00000021413	35.5974	-0.886547	0.433638	-2.04444	0.0409101	0.541567	Prpf4b
ENSMUSG00000024983	7.52586	-1.60151	0.782338	-2.04708	0.0406504	0.541567	Vti1a
ENSMUSG00000028557	14.8408	1.28532	0.626906	2.05026	0.0403393	0.541567	Rnf11
ENSMUSG00000031314	17.4146	-1.25931	0.615885	-2.04471	0.0408833	0.541567	Taf1
ENSMUSG00000031887	6.81347	-1.9392	0.947225	-2.04725	0.0406338	0.541567	Tradd
ENSMUSG00000032966	39.6286	0.904488	0.441903	2.0468	0.0406773	0.541567	Fkbp1a
ENSMUSG00000035575	12.9699	-1.63856	0.800355	-2.04729	0.0406293	0.541567	Utp6
ENSMUSG00000036432	5.31894	-2.0258	0.987739	-2.05095	0.040272	0.541567	Siah2
ENSMUSG00000040506	24.1114	-1.06456	0.520556	-2.04505	0.0408501	0.541567	Ambra1
ENSMUSG00000043929	7.83514	-1.89977	0.928628	-2.04578	0.0407784	0.541567	Klhl15
ENSMUSG00000061535	18.215	-1.8804	0.918695	-2.04682	0.040676	0.541567	C1qtnf7
ENSMUSG00000025255	211.519	-0.572677	0.280367	-2.0426	0.0410924	0.542577	Zfhx4
ENSMUSG00000037266	240.74	-0.571944	0.280043	-2.04235	0.0411173	0.542577	Rsrp1
ENSMUSG00000044709	17.4175	1.26803	0.621003	2.04191	0.0411606	0.542577	Gemin7
ENSMUSG00000017897	39.3711	-1.05818	0.518869	-2.0394	0.0414099	0.542884	Eya2
ENSMUSG00000031565	85.1833	-0.497501	0.243789	-2.04071	0.0412801	0.542884	Fgfr1
ENSMUSG00000042997	10.8641	-2.00609	0.983977	-2.03876	0.0414743	0.542884	Nhlrc3
ENSMUSG00000050737	15.3029	-1.72877	0.847851	-2.03901	0.0414495	0.542884	Ptges
ENSMUSG00000089797	6.37589	-1.90572	0.934707	-2.03884	0.0414656	0.542884	Gm16118
ENSMUSG00000029380	1.86237	-1.55044	0.760968	-2.03745	0.0416048	0.543321	Cxcl1
ENSMUSG00000034412	13.1582	-1.74668	0.857368	-2.03726	0.041624	0.543321	Tbc1d10a
ENSMUSG00000005469	13.2547	-1.17577	0.580334	-2.02602	0.042763	0.545688	Prkaca
ENSMUSG00000016427	10.3018	1.12891	0.557822	2.02378	0.0429928	0.545688	Ndufa1
ENSMUSG00000020231	30.1813	-0.933444	0.461391	-2.02311	0.0430621	0.545688	Dip2a
ENSMUSG00000020898	6.91004	-1.77968	0.876755	-2.02985	0.0423719	0.545688	Ctc1
ENSMUSG00000021036	27.3343	-1.20598	0.594758	-2.02768	0.0425927	0.545688	Sptlc2
ENSMUSG00000022682	17.5857	1.27724	0.629442	2.02915	0.0424426	0.545688	Rrn3
ENSMUSG00000024383	21.5843	-1.04152	0.513985	-2.02636	0.042728	0.545688	Map3k2
ENSMUSG00000026349	78.4535	-0.81959	0.403169	-2.03287	0.0420658	0.545688	Ccnt2
ENSMUSG00000026516	17.5959	1.25251	0.617247	2.02918	0.0424397	0.545688	Nvl
ENSMUSG00000027650	15.3931	-1.8152	0.896878	-2.02391	0.0429795	0.545688	Tti1
ENSMUSG00000028580	41.4154	-0.76445	0.375961	-2.03332	0.0420202	0.545688	Pum1
ENSMUSG00000030795	111.87	-0.529591	0.26087	-2.0301	0.0423465	0.545688	Fus
ENSMUSG00000032194	25.9069	1.08523	0.536553	2.0226	0.0431142	0.545688	Kank2
ENSMUSG00000033953	17.8123	1.15387	0.568154	2.03091	0.0422645	0.545688	Ppp3r1
ENSMUSG00000037608	92.9017	-0.713136	0.350849	-2.0326	0.0420931	0.545688	Bclaf1
ENSMUSG00000037833	4.19653	2.0582	1.01724	2.02332	0.04304	0.545688	Sh2d4b
ENSMUSG00000041096	15.4382	-1.3989	0.690642	-2.02551	0.0428152	0.545688	Tspyl2
ENSMUSG00000042178	17.006	1.55986	0.76954	2.027	0.0426623	0.545688	Armc5
ENSMUSG00000058470	15.1846	-1.6372	0.809013	-2.02371	0.0430004	0.545688	Gm8369
ENSMUSG00000060992	42.5147	1.31415	0.648169	2.02748	0.0426134	0.545688	Copz1
ENSMUSG00000069094	8.64543	-1.72247	0.848565	-2.02987	0.0423701	0.545688	Pde7a
ENSMUSG00000069729	34.2687	0.911203	0.450584	2.02227	0.0431482	0.545688	Arid1b
ENSMUSG00000103674	19.8476	-1.66233	0.818218	-2.03164	0.0421898	0.545688	Gm37699
ENSMUSG00000036672	4.53146	-1.95096	0.965074	-2.02157	0.0432211	0.545871	Cenpt
ENSMUSG00000022614	34.1472	1.20234	0.595714	2.01831	0.0435589	0.546052	Lmf2
ENSMUSG00000038042	12.5873	-1.39191	0.689113	-2.01986	0.0433984	0.546052	Ptpdc1
ENSMUSG00000043991	85.5725	-0.66824	0.330675	-2.02084	0.0432968	0.546052	Pura
ENSMUSG00000059005	10.5578	-0.863571	0.427693	-2.01914	0.0434728	0.546052	Hnrnpa3
ENSMUSG00000060467	7.84971	0.499585	0.247381	2.0195	0.0434354	0.546052	Gm10080
ENSMUSG00000071655	26.269	-1.36038	0.674107	-2.01805	0.043586	0.546052	Ubxn1
ENSMUSG00000056211	52.704	-0.780621	0.387012	-2.01705	0.0436905	0.546628	R3hdm1
ENSMUSG00000024811	68.4022	-0.806536	0.400104	-2.01581	0.0438195	0.54751	Tnks2
ENSMUSG00000024782	185.526	0.656603	0.326059	2.01375	0.0440353	0.548738	Ak3
ENSMUSG00000033416	6.68956	1.83392	0.910485	2.01422	0.0439866	0.548738	Gucd1
ENSMUSG00000023106	12.3782	1.26908	0.630848	2.01171	0.0442509	0.550691	Denr
ENSMUSG00000001082	30.2533	1.31325	0.653884	2.00838	0.0446024	0.552648	Mfsd10
ENSMUSG00000009470	47.373	-0.837783	0.417225	-2.00799	0.0446446	0.552648	Tnpo1
ENSMUSG00000029068	97.4589	-0.682822	0.339853	-2.00917	0.0445189	0.552648	Ccnl2
ENSMUSG00000041769	19.1493	-1.15583	0.575514	-2.00835	0.0446064	0.552648	Ppp2r2d
ENSMUSG00000030029	8.33358	-1.49706	0.746183	-2.00629	0.0448251	0.552685	Lrig1
ENSMUSG00000054309	26.9939	-1.23984	0.617855	-2.00669	0.0447825	0.552685	Cpsf3
ENSMUSG00000060073	14.9727	-0.757426	0.37733	-2.00733	0.0447146	0.552685	Psma3
ENSMUSG00000064358	3.47681	-0.635145	0.316734	-2.00529	0.0449318	0.553271	mt-Co3
ENSMUSG00000042826	1.37109	-2.01686	1.00683	-2.00319	0.0451569	0.555311	Fgf11
ENSMUSG00000029661	502.206	0.374508	0.187011	2.00259	0.0452212	0.555371	Col1a2
ENSMUSG00000010830	39.5952	1.22392	0.611527	2.00142	0.0453473	0.55548	Kdelr3
ENSMUSG00000049728	7.46274	-1.62301	0.810936	-2.0014	0.045349	0.55548	Zfp668
ENSMUSG00000052748	26.3619	-1.0354	0.517542	-2.00062	0.0454334	0.555786	Swt1
ENSMUSG00000039316	73.5692	-0.775096	0.387625	-1.9996	0.0455434	0.556403	Rftn1
ENSMUSG00000019944	7.57993	-1.57223	0.78703	-1.99768	0.0457514	0.557945	Rhobtb1
ENSMUSG00000090952	2.22064	-1.841	0.92173	-1.99733	0.045789	0.557945	Gm17251
ENSMUSG00000004233	5.48024	-2.15206	1.07896	-1.99458	0.0460891	0.560871	Wars2
ENSMUSG00000031812	89.2617	0.729663	0.366384	1.99153	0.0464229	0.562495	Map1lc3b
ENSMUSG00000032712	61.6323	-0.90662	0.455258	-1.99144	0.0464322	0.562495	2810474O19Rik
ENSMUSG00000033287	3.73836	1.60184	0.804052	1.99221	0.0463477	0.562495	Kctd17
ENSMUSG00000039536	49.6361	-0.864928	0.434596	-1.99019	0.04657	0.562495	Stau1
ENSMUSG00000042677	15.4771	-1.20691	0.606286	-1.99067	0.0465175	0.562495	Zc3h12a
ENSMUSG00000060680	1.82195	0.734517	0.369092	1.99007	0.0465837	0.562495	Gm8894
ENSMUSG00000044308	62.6301	-0.76588	0.385174	-1.9884	0.0467674	0.562533	Ubr3
ENSMUSG00000049658	18.7371	-1.07981	0.543048	-1.98842	0.046765	0.562533	Bdp1
ENSMUSG00000068040	40.4648	-0.942802	0.473967	-1.98917	0.0466821	0.562533	Tm9sf4
ENSMUSG00000031446	22.0682	1.11518	0.561379	1.9865	0.0469775	0.564333	Cul4a
ENSMUSG00000034300	8.76462	-1.39981	0.704874	-1.98591	0.0470436	0.564402	Fam53c
ENSMUSG00000026851	9.40129	-1.43919	0.725019	-1.98504	0.0471406	0.564841	BC005624
ENSMUSG00000020451	14.4426	-1.49599	0.754152	-1.98368	0.0472918	0.564986	Limk2
ENSMUSG00000039967	55.7785	-1.00331	0.505704	-1.98399	0.0472574	0.564986	Zfp292
ENSMUSG00000042675	42.4992	0.819694	0.413411	1.98276	0.0473945	0.564986	Ypel3
ENSMUSG00000066152	3.02423	-2.17486	1.0966	-1.98327	0.0473369	0.564986	Slc31a2
ENSMUSG00000015143	41.3714	-0.696292	0.35193	-1.9785	0.0478728	0.566152	Actn1
ENSMUSG00000022010	170.986	0.633921	0.320802	1.97605	0.048149	0.566152	Tsc22d1
ENSMUSG00000024084	7.99223	-1.72507	0.871984	-1.97833	0.0478918	0.566152	Qpct
ENSMUSG00000027002	39.4435	-0.723196	0.365859	-1.97671	0.0480747	0.566152	Nckap1
ENSMUSG00000028164	16.7537	-1.59346	0.806364	-1.9761	0.0481429	0.566152	Manba
ENSMUSG00000038260	6.82992	-1.91902	0.969216	-1.97997	0.0477069	0.566152	Trpm4
ENSMUSG00000044573	5.4728	1.65715	0.837677	1.97827	0.0478987	0.566152	Acp1
ENSMUSG00000049521	122.226	-0.630936	0.319305	-1.97597	0.0481586	0.566152	Cdc42ep1
ENSMUSG00000054263	462.752	-0.586401	0.296536	-1.9775	0.0479847	0.566152	Lifr
ENSMUSG00000068742	41.7708	-1.08667	0.549754	-1.97664	0.0480823	0.566152	Cry2
ENSMUSG00000068917	36.5116	-1.04949	0.531008	-1.97642	0.0481072	0.566152	Clk2
ENSMUSG00000018395	13.0434	-1.75934	0.893415	-1.96923	0.0489264	0.568033	Kif3a
ENSMUSG00000020604	2.20933	-2.17476	1.10416	-1.96961	0.0488834	0.568033	Arsg
ENSMUSG00000026042	83.1643	0.840112	0.425606	1.97392	0.0483909	0.568033	Col5a2
ENSMUSG00000026283	22.3313	-1.48758	0.75398	-1.97297	0.0484989	0.568033	Ing5
ENSMUSG00000029426	36.3457	-1.04816	0.532021	-1.97015	0.0488212	0.568033	Scarb2
ENSMUSG00000032350	10.0601	-2.12051	1.07643	-1.96994	0.0488453	0.568033	Gclc
ENSMUSG00000034435	10.1562	-1.59796	0.810681	-1.97113	0.0487093	0.568033	Tmem30b
ENSMUSG00000041702	29.2753	-0.865986	0.439549	-1.97017	0.0488187	0.568033	Btbd7
ENSMUSG00000070632	2.46012	-1.69069	0.856982	-1.97284	0.0485138	0.568033	Btbd8
ENSMUSG00000080966	12.731	-0.617064	0.312989	-1.97152	0.0486647	0.568033	Gm6263
ENSMUSG00000005698	29.8646	-0.988354	0.502198	-1.96806	0.0490616	0.56819	Ctcf
ENSMUSG00000056258	19.171	1.65327	0.83983	1.96858	0.0490013	0.56819	Kcnq3
ENSMUSG00000029372	1.71829	-0.793824	0.403575	-1.96698	0.0491858	0.568678	Ppbp
ENSMUSG00000082286	2.468	-0.926036	0.470873	-1.96663	0.0492254	0.568678	Pisd-ps1
ENSMUSG00000023259	6.07416	-1.97382	1.00403	-1.96589	0.0493116	0.568971	Slc26a6
ENSMUSG00000026727	49.9311	0.77936	0.397037	1.96294	0.0496533	0.57066	Rsu1
ENSMUSG00000038836	9.1772	-1.54061	0.784637	-1.96347	0.0495911	0.57066	Agbl3
ENSMUSG00000040483	12.0662	1.47267	0.750133	1.96322	0.0496209	0.57066	Xaf1
ENSMUSG00000054770	11.691	1.61101	0.82089	1.96252	0.0497023	0.57066	Kctd18
ENSMUSG00000020340	2.92175	-2.1158	1.08046	-1.95824	0.0502022	0.572885	Cyfip2
ENSMUSG00000022052	16.5205	1.04755	0.534643	1.95935	0.0500713	0.572885	Ppp2r2a
ENSMUSG00000025408	11.5046	-1.6093	0.821782	-1.9583	0.0501945	0.572885	Ddit3
ENSMUSG00000032320	54.2038	-0.84054	0.429159	-1.95858	0.0501624	0.572885	Rcn2
ENSMUSG00000050812	73.321	-0.594574	0.303628	-1.95823	0.0502026	0.572885	AI314180
ENSMUSG00000022773	3.29136	-2.11565	1.08077	-1.95753	0.050285	0.572954	Ypel1
ENSMUSG00000050017	18.5979	-1.19969	0.612983	-1.95714	0.0503312	0.572954	Pitpnb
ENSMUSG00000033819	11.6833	-2.0158	1.03078	-1.9556	0.0505125	0.573024	Ppp1r16a
ENSMUSG00000054280	42.6348	-1.00532	0.513971	-1.956	0.0504657	0.573024	Prr14l
ENSMUSG00000057388	12.0044	1.47283	0.753164	1.95552	0.0505213	0.573024	Mrpl18
ENSMUSG00000012848	131.456	0.622852	0.318766	1.95395	0.0507077	0.573746	Rps5
ENSMUSG00000036825	12.7272	-1.57202	0.804443	-1.95417	0.0506811	0.573746	Ssx2ip
ENSMUSG00000041632	4.4174	-2.13323	1.09228	-1.953	0.05082	0.574321	Mrps27
ENSMUSG00000023572	15.3057	1.64512	0.845057	1.94676	0.0515638	0.578852	Ccndbp1
ENSMUSG00000024400	48.9983	-0.928449	0.476866	-1.94698	0.0515367	0.578852	Wdr33
ENSMUSG00000037204	11.5397	1.76788	0.907336	1.94843	0.051364	0.578852	Atg101
ENSMUSG00000060657	31.711	-0.954482	0.490197	-1.94714	0.0515178	0.578852	Marf1
ENSMUSG00000062762	21.1909	1.26808	0.651631	1.946	0.0516544	0.578852	Ei24
ENSMUSG00000071640	2.51922	-1.627	0.836035	-1.9461	0.0516431	0.578852	Stxbp3-ps
ENSMUSG00000073664	116.501	-0.677627	0.347904	-1.94774	0.051446	0.578852	Nbeal1
ENSMUSG00000019795	35.8392	-0.960905	0.494995	-1.94124	0.052229	0.580043	Pcmt1
ENSMUSG00000021270	20.7346	-1.03249	0.532007	-1.94075	0.0522881	0.580043	Hsp90aa1
ENSMUSG00000022672	58.6321	-0.986836	0.508323	-1.94136	0.0522151	0.580043	Prkdc
ENSMUSG00000022969	41.8815	0.895341	0.460722	1.94334	0.0519748	0.580043	Il10rb
ENSMUSG00000023175	143.054	0.520364	0.267632	1.94432	0.0518563	0.580043	Bsg
ENSMUSG00000025584	11.2253	-1.32964	0.684053	-1.94376	0.0519239	0.580043	Pde8a
ENSMUSG00000027999	4.55617	-2.00815	1.03466	-1.94088	0.0522728	0.580043	Pla2g12a
ENSMUSG00000053641	27.4066	-1.10822	0.571101	-1.9405	0.0523193	0.580043	Dennd4a
ENSMUSG00000056708	22.0912	-1.38568	0.713677	-1.94161	0.0521843	0.580043	Ier5
ENSMUSG00000005054	23.6147	-0.993607	0.514323	-1.93188	0.0533749	0.583217	Cstb
ENSMUSG00000018417	113.727	-0.618574	0.319574	-1.93562	0.0529142	0.583217	Myo1b
ENSMUSG00000020677	16.5346	-1.57411	0.816093	-1.92883	0.0537518	0.583217	Ddx52
ENSMUSG00000020908	1.44929	-1.46831	0.758785	-1.93508	0.0529801	0.583217	Myh3
ENSMUSG00000021754	14.3231	-1.30434	0.673593	-1.93639	0.0528204	0.583217	Map3k1
ENSMUSG00000021962	14.933	-1.35296	0.701214	-1.92945	0.0536748	0.583217	Dcp1a
ENSMUSG00000022947	13.9537	1.42107	0.737131	1.92783	0.0538758	0.583217	Cbr3
ENSMUSG00000024866	9.78467	1.58065	0.816087	1.93687	0.0527618	0.583217	Acy3
ENSMUSG00000025357	11.5529	1.31711	0.680589	1.93525	0.0529592	0.583217	Dgka
ENSMUSG00000025453	22.1385	1.15953	0.601122	1.92894	0.0537388	0.583217	Nnt
ENSMUSG00000029802	33.9853	1.10038	0.569838	1.93104	0.0534778	0.583217	Abcg2
ENSMUSG00000031239	51.2289	1.12782	0.585343	1.92678	0.0540076	0.583217	Itm2a
ENSMUSG00000032612	51.3931	-0.896545	0.464116	-1.93173	0.0533933	0.583217	Usp4
ENSMUSG00000033364	28.6132	-1.04821	0.54317	-1.9298	0.053632	0.583217	Usp37
ENSMUSG00000034042	6.1199	1.04289	0.54015	1.93075	0.0535141	0.583217	Gpbp1l1
ENSMUSG00000034401	17.3324	-1.4184	0.734154	-1.93201	0.0533578	0.583217	Spata6
ENSMUSG00000036810	12.9467	-1.3111	0.680734	-1.92601	0.0541033	0.583217	Cnep1r1
ENSMUSG00000040265	2.84403	-2.08019	1.07795	-1.92976	0.053637	0.583217	Dnm3
ENSMUSG00000041115	8.04803	1.49516	0.773002	1.93423	0.0530854	0.583217	Iqsec2
ENSMUSG00000050064	1.99205	-2.14056	1.10755	-1.93269	0.0532741	0.583217	Zfp697
ENSMUSG00000063480	2.87497	1.02078	0.52991	1.92632	0.0540641	0.583217	Snu13
ENSMUSG00000073609	4.55068	-1.7567	0.911058	-1.9282	0.0538298	0.583217	D2hgdh
ENSMUSG00000075700	17.8277	-0.766812	0.396189	-1.93547	0.0529324	0.583217	Selenot
ENSMUSG00000100215	1.59298	0.929955	0.482697	1.92658	0.0540317	0.583217	Gm8292
ENSMUSG00000024098	17.9178	0.954208	0.495866	1.92433	0.0543136	0.584809	Twsg1
ENSMUSG00000002748	85.4444	-0.666647	0.346616	-1.9233	0.0544425	0.585026	Baz1b
ENSMUSG00000068284	22.3451	1.11313	0.578801	1.92317	0.0544588	0.585026	Usf3
ENSMUSG00000025364	21.3634	-1.15108	0.599069	-1.92145	0.0546746	0.585538	Pa2g4
ENSMUSG00000027435	7.93695	1.48162	0.771274	1.921	0.0547313	0.585538	Cd93
ENSMUSG00000037935	15.9587	0.880615	0.458304	1.92147	0.0546729	0.585538	Smarce1
ENSMUSG00000051920	58.6498	1.02861	0.535512	1.9208	0.0547572	0.585538	Rspo2
ENSMUSG00000038290	29.3514	-0.99405	0.517842	-1.9196	0.0549081	0.586482	Smg6
ENSMUSG00000027746	11.2095	1.21621	0.634076	1.91809	0.0551002	0.587861	Ufm1
ENSMUSG00000038525	8.45232	-1.81728	0.948012	-1.91694	0.0552451	0.588065	Armc10
ENSMUSG00000072235	64.5611	0.607174	0.316695	1.91722	0.0552102	0.588065	Tuba1a
ENSMUSG00000021520	4.66615	0.823649	0.429851	1.91613	0.0553488	0.588498	Uqcrb
ENSMUSG00000020525	10.6219	-1.726	0.901492	-1.9146	0.0555431	0.589804	Ppm1d
ENSMUSG00000026566	75.052	0.832008	0.434656	1.91417	0.0555978	0.589804	Mpzl1
ENSMUSG00000022425	46.1715	-1.07114	0.559855	-1.91325	0.0557167	0.590395	Enpp2
ENSMUSG00000013858	8.13	1.44155	0.75535	1.90845	0.0563332	0.590556	Tmem259
ENSMUSG00000024436	3.0822	1.8582	0.973792	1.90821	0.0563638	0.590556	Mrps18b
ENSMUSG00000026782	27.4679	-0.977258	0.511152	-1.91187	0.0558926	0.590556	Abi2
ENSMUSG00000033760	38.337	-0.952892	0.498383	-1.91197	0.0558806	0.590556	Rbm4b
ENSMUSG00000040520	15.8356	-1.5232	0.797219	-1.91064	0.0560513	0.590556	Manea
ENSMUSG00000041355	73.395	0.849991	0.445014	1.91003	0.0561289	0.590556	Ssr2
ENSMUSG00000055782	26.417	-1.55762	0.815986	-1.90888	0.0562773	0.590556	Abcd2
ENSMUSG00000058503	27.5591	-1.07857	0.565121	-1.90857	0.0563182	0.590556	Fam133b
ENSMUSG00000061353	15094.8	0.215947	0.112976	1.91144	0.0559477	0.590556	Cxcl12
ENSMUSG00000071637	166.34	-1.00619	0.526737	-1.91023	0.0561038	0.590556	Cebpd
ENSMUSG00000083544	1.4909	-0.861007	0.451657	-1.90633	0.0566078	0.592449	Oat-rs1
ENSMUSG00000024949	74.5056	-0.582938	0.305916	-1.90555	0.0567086	0.59284	Sf1
ENSMUSG00000090957	3.29248	-1.30955	0.687861	-1.9038	0.0569363	0.594555	Gm7535
ENSMUSG00000046618	191.612	-0.660504	0.347115	-1.90284	0.0570614	0.595196	Olfml2a
ENSMUSG00000020620	14.7356	-1.57405	0.827821	-1.90144	0.0572442	0.595773	Abca8b
ENSMUSG00000089991	1.56594	-0.991763	0.521519	-1.90168	0.0572126	0.595773	Gm16332
ENSMUSG00000030257	26.4277	-1.46265	0.769762	-1.90014	0.0574148	0.596884	Srgap3
ENSMUSG00000047423	10.1683	1.38291	0.728607	1.89801	0.0576942	0.599122	AI837181
ENSMUSG00000006191	22.9283	-0.957319	0.50538	-1.89425	0.0581914	0.599338	Cdkal1
ENSMUSG00000020211	11.0645	-1.44145	0.761092	-1.89392	0.0582358	0.599338	Sf3a2
ENSMUSG00000021140	52.1048	-0.674034	0.356198	-1.8923	0.0584507	0.599338	Pcnx
ENSMUSG00000021546	75.6396	-0.47556	0.250885	-1.89553	0.0580218	0.599338	Hnrnpk
ENSMUSG00000025993	102.544	0.786482	0.414778	1.89615	0.0579404	0.599338	Slc40a1
ENSMUSG00000026034	180.68	-0.517353	0.273713	-1.89013	0.058741	0.599338	Clk1
ENSMUSG00000030259	12.523	-1.49616	0.79037	-1.89298	0.0583605	0.599338	Rassf8
ENSMUSG00000033763	46.3391	-0.67102	0.354643	-1.8921	0.0584776	0.599338	Mtss1l
ENSMUSG00000034868	43.6913	0.61833	0.326533	1.89362	0.0582754	0.599338	Myl12b
ENSMUSG00000036856	41.4959	1.12439	0.593055	1.89593	0.0579696	0.599338	Wnt4
ENSMUSG00000039298	16.2588	-1.14444	0.605242	-1.89088	0.0586406	0.599338	Cdk5rap2
ENSMUSG00000041390	36.9171	0.853778	0.451268	1.89195	0.0584973	0.599338	Mdfic
ENSMUSG00000048970	7.88683	1.96232	1.03761	1.89119	0.0585985	0.599338	C1galt1c1
ENSMUSG00000055866	21.4494	-1.10915	0.585325	-1.89493	0.058102	0.599338	Per2
ENSMUSG00000056167	39.0884	-0.93923	0.495336	-1.89615	0.0579405	0.599338	Cnot10
ENSMUSG00000060012	77.7569	-0.713544	0.377448	-1.89044	0.0586987	0.599338	Kif13b
ENSMUSG00000015597	39.7313	-1.20964	0.64104	-1.887	0.059161	0.600127	Zfp318
ENSMUSG00000025189	20.5827	1.19519	0.633448	1.8868	0.0591873	0.600127	Cnnm1
ENSMUSG00000026017	5.75935	-1.58707	0.841065	-1.88698	0.0591637	0.600127	Carf
ENSMUSG00000029126	25.1457	-0.974906	0.516875	-1.88616	0.0592741	0.600127	Nsg1
ENSMUSG00000029312	11.7005	1.47214	0.780327	1.88657	0.0592188	0.600127	Klhl8
ENSMUSG00000037062	72.0732	-0.645129	0.342081	-1.8859	0.0593088	0.600127	Sh3glb1
ENSMUSG00000037890	4.59201	1.90199	1.00736	1.8881	0.059012	0.600127	Wdr19
ENSMUSG00000074925	18.5449	-1.62183	0.860054	-1.88572	0.0593321	0.600127	Ptar1
ENSMUSG00000037926	127.561	-0.587036	0.311549	-1.88425	0.0595309	0.601487	Ssh2
ENSMUSG00000063052	5.41811	-1.82187	0.967253	-1.88355	0.0596259	0.601797	Lrrc40
ENSMUSG00000035722	10.8209	-1.45845	0.774869	-1.88219	0.0598107	0.603011	Abca7
ENSMUSG00000002847	41.1582	-1.10917	0.589737	-1.8808	0.0599996	0.603706	Pla1a
ENSMUSG00000003038	6.30961	-0.855313	0.454778	-1.88073	0.0600089	0.603706	Hmgn2
ENSMUSG00000038539	3.36369	1.33256	0.70894	1.87965	0.0601559	0.603885	Atf5
ENSMUSG00000041592	49.0385	-0.898957	0.478189	-1.87992	0.0601191	0.603885	Sdk2
ENSMUSG00000020894	40.7712	-0.725577	0.386218	-1.87867	0.0602895	0.604577	Vamp2
ENSMUSG00000070047	328.643	-0.453155	0.241341	-1.87765	0.0604289	0.605326	Fat1
ENSMUSG00000003865	8.26928	1.61156	0.86292	1.86757	0.0618219	0.605647	Gys1
ENSMUSG00000006498	50.7354	-0.645827	0.345559	-1.86893	0.0616323	0.605647	Ptbp1
ENSMUSG00000013622	60.6166	0.797399	0.425648	1.87338	0.0610165	0.605647	Atraid
ENSMUSG00000015165	55.9984	-0.596385	0.318825	-1.87057	0.0614043	0.605647	Hnrnpl
ENSMUSG00000015968	8.99126	-1.90567	1.01743	-1.87302	0.061065	0.605647	Cacna1d
ENSMUSG00000020869	39.349	1.18072	0.631953	1.86836	0.061712	0.605647	Lrrc59
ENSMUSG00000023990	1.9915	1.57084	0.838251	1.87395	0.0609369	0.605647	Tfeb
ENSMUSG00000025019	20.0329	-1.16041	0.620078	-1.87139	0.0612909	0.605647	Lcor
ENSMUSG00000025151	110.505	0.622997	0.332954	1.87112	0.0613281	0.605647	Maged1
ENSMUSG00000026276	71.8126	-0.5871	0.313866	-1.87054	0.0614089	0.605647	Sept2
ENSMUSG00000026433	4.32944	-1.81032	0.966574	-1.87292	0.0610793	0.605647	Rab29
ENSMUSG00000028330	13.5976	-1.38964	0.743384	-1.86934	0.0615755	0.605647	Ncbp1
ENSMUSG00000028618	231.124	0.447725	0.239596	1.86867	0.0616694	0.605647	Tmem59
ENSMUSG00000029217	6.67888	-1.70563	0.910484	-1.87332	0.0610238	0.605647	Tec
ENSMUSG00000029575	5.55473	-2.07398	1.10729	-1.87303	0.0610649	0.605647	Mmab
ENSMUSG00000029729	26.5462	-1.16555	0.624082	-1.86762	0.0618148	0.605647	Zkscan1
ENSMUSG00000045573	9.71109	-2.10079	1.12004	-1.87564	0.0607042	0.605647	Penk
ENSMUSG00000064341	439.801	-0.413495	0.220311	-1.87687	0.0605356	0.605647	mt-Nd1
ENSMUSG00000073131	12.2325	-1.15118	0.616101	-1.86849	0.0616942	0.605647	Vma21
ENSMUSG00000079478	4.98591	1.92629	1.02768	1.8744	0.0608749	0.605647	Sssca1
ENSMUSG00000091512	9.77856	1.10591	0.592045	1.86796	0.0617682	0.605647	Lamtor3
ENSMUSG00000017418	16.8434	-1.26576	0.679142	-1.86376	0.0623553	0.610233	Arl5b
ENSMUSG00000029287	275.452	-0.298235	0.160079	-1.86305	0.0624555	0.610575	Tgfbr3
ENSMUSG00000002020	288.921	-0.766847	0.411898	-1.86174	0.0626394	0.611184	Ltbp2
ENSMUSG00000102543	5.25266	-1.86304	1.00073	-1.86168	0.0626487	0.611184	Pcdhgc5
ENSMUSG00000043065	2.89737	-1.92583	1.03514	-1.86046	0.0628199	0.611514	Spice1
ENSMUSG00000046139	10.7867	-1.26483	0.679738	-1.86076	0.0627783	0.611514	Patl1
ENSMUSG00000069874	28.0371	-1.3012	0.69955	-1.86005	0.0628788	0.611514	Irgm2
ENSMUSG00000003500	17.5657	1.65195	0.888657	1.85892	0.063038	0.6121	Impdh1
ENSMUSG00000037443	4.07932	-1.79576	0.966137	-1.8587	0.06307	0.6121	Cep85
ENSMUSG00000018547	2.96115	1.53552	0.826755	1.85728	0.0632711	0.612302	Pip4k2b
ENSMUSG00000020828	7.72999	-1.88525	1.01512	-1.85717	0.0632873	0.612302	Pld2
ENSMUSG00000027951	11.0213	-1.1403	0.613977	-1.85723	0.0632783	0.612302	Adar
ENSMUSG00000027878	179.134	-0.474353	0.255492	-1.85663	0.0633643	0.612412	Notch2
ENSMUSG00000021302	12.7973	-1.32884	0.716975	-1.85339	0.0638259	0.6156	Ggps1
ENSMUSG00000032666	14.6449	1.31248	0.707995	1.85379	0.0637689	0.6156	1700025G04Rik
ENSMUSG00000067567	3.13979	1.85435	1.0011	1.85232	0.0639793	0.616444	Hdac8
ENSMUSG00000001440	30.9394	-0.888499	0.479837	-1.85167	0.0640736	0.616716	Kpnb1
ENSMUSG00000044700	11.6367	-1.37267	0.741601	-1.85096	0.0641756	0.617063	Tmem201
ENSMUSG00000019978	91.2539	-0.549308	0.296924	-1.85	0.064314	0.617758	Epb41l2
ENSMUSG00000047747	4.41169	1.16775	0.631391	1.84949	0.0643875	0.617829	Rnf150
ENSMUSG00000040435	58.5415	-1.31616	0.712547	-1.84713	0.064729	0.619833	Ppp1r15a
ENSMUSG00000083992	7.77257	0.523071	0.283117	1.84754	0.0646687	0.619833	Gm11478
ENSMUSG00000073702	1.74629	-1.64549	0.891187	-1.8464	0.0648345	0.620208	Rpl31
ENSMUSG00000002808	164.715	0.61752	0.334652	1.84526	0.0649997	0.620649	Epdr1
ENSMUSG00000046546	16.4175	1.14469	0.620373	1.84517	0.0650134	0.620649	Fam43a
ENSMUSG00000035048	5.76409	1.0547	0.571865	1.84432	0.0651372	0.621196	Anapc13
ENSMUSG00000082588	1.44963	-1.62243	0.88013	-1.8434	0.0652705	0.621833	Gm15443
ENSMUSG00000000392	162.11	-0.486734	0.264185	-1.8424	0.0654167	0.622591	Fap
ENSMUSG00000026558	5.05881	1.78562	0.970791	1.83934	0.065865	0.62622	Uck2
ENSMUSG00000032024	145.254	-0.484408	0.263477	-1.83852	0.0659858	0.62633	Clmp
ENSMUSG00000042804	72.7209	-0.931101	0.506487	-1.83835	0.0660106	0.62633	Gpr153
ENSMUSG00000041959	13.7905	0.955036	0.519732	1.83756	0.0661278	0.626806	S100a10
ENSMUSG00000032228	53.5673	-0.670258	0.364997	-1.83634	0.0663078	0.627239	Tcf12
ENSMUSG00000040033	31.4207	-0.990417	0.539214	-1.83678	0.0662427	0.627239	Stat2
ENSMUSG00000029387	6.08431	1.74446	0.950485	1.83533	0.0664564	0.62801	Gtf2h3
ENSMUSG00000027207	34.1173	-1.0756	0.587507	-1.83078	0.067133	0.632181	Galk2
ENSMUSG00000029614	13.3587	-0.729663	0.398703	-1.83009	0.067236	0.632181	Rpl6
ENSMUSG00000032883	6.94525	-1.56722	0.856165	-1.83051	0.0671738	0.632181	Acsl3
ENSMUSG00000034157	6.21962	-1.82123	0.994901	-1.83057	0.0671654	0.632181	Cipc
ENSMUSG00000036646	20.8546	-1.02101	0.557822	-1.83035	0.0671975	0.632181	Man1b1
ENSMUSG00000000346	57.7001	0.829171	0.455979	1.81844	0.0689967	0.633157	Dazap2
ENSMUSG00000004100	10.8203	-1.72714	0.952971	-1.81238	0.0699276	0.633157	Ppan
ENSMUSG00000007817	85.3991	-0.625657	0.344729	-1.81492	0.0695358	0.633157	Zmiz1
ENSMUSG00000020423	42.0419	-1.31983	0.72311	-1.82521	0.0679687	0.633157	Btg2
ENSMUSG00000021556	14.7825	-1.39076	0.764151	-1.82001	0.0687571	0.633157	Golm1
ENSMUSG00000022893	165.212	-0.948496	0.523352	-1.81235	0.0699326	0.633157	Adamts1
ENSMUSG00000023170	27.6806	-1.1201	0.613213	-1.82661	0.067758	0.633157	Gps2
ENSMUSG00000024164	280.123	-0.762506	0.418437	-1.82227	0.0684135	0.633157	C3
ENSMUSG00000024474	43.4884	0.915231	0.505127	1.81188	0.0700043	0.633157	Ik
ENSMUSG00000025316	6.01427	1.40677	0.773987	1.81757	0.0691305	0.633157	Banp
ENSMUSG00000025580	31.9711	0.82254	0.452922	1.81608	0.0693588	0.633157	Eif4a3
ENSMUSG00000026208	11.1296	-1.39772	0.766794	-1.82281	0.0683321	0.633157	Des
ENSMUSG00000026313	26.8971	-1.05951	0.584852	-1.81159	0.0700497	0.633157	Hdac4
ENSMUSG00000026812	15.83	-1.29002	0.709442	-1.81836	0.0690097	0.633157	Tsc1
ENSMUSG00000027088	4.30907	-1.93047	1.06456	-1.8134	0.0697698	0.633157	Phospho2
ENSMUSG00000028104	4.03558	-1.23571	0.678987	-1.81994	0.0687689	0.633157	Polr3gl
ENSMUSG00000028184	79.2553	-0.70235	0.384748	-1.82548	0.0679287	0.633157	Adgrl2
ENSMUSG00000028920	18.5421	-1.36982	0.754232	-1.81617	0.0693438	0.633157	Fbxo42
ENSMUSG00000029629	23.8556	-0.985831	0.540417	-1.8242	0.0681213	0.633157	Phf14
ENSMUSG00000029657	10.4939	-1.64413	0.899409	-1.82801	0.0675485	0.633157	Hsph1
ENSMUSG00000031935	7.1757	1.62069	0.894392	1.81206	0.0699771	0.633157	Med17
ENSMUSG00000032279	13.4613	1.65621	0.912108	1.8158	0.0694008	0.633157	Idh3a
ENSMUSG00000032375	5.71641	1.88807	1.04076	1.81412	0.0696597	0.633157	Aph1b
ENSMUSG00000032397	10.1651	1.59881	0.876785	1.82349	0.0682296	0.633157	Tipin
ENSMUSG00000032470	15.3994	-1.08693	0.599583	-1.81281	0.0698611	0.633157	Mras
ENSMUSG00000033684	33.2578	0.906468	0.496659	1.82513	0.0679812	0.633157	Qsox1
ENSMUSG00000036450	16.8276	-1.64046	0.900048	-1.82264	0.0683579	0.633157	Hif1an
ENSMUSG00000038205	27.1353	-1.06574	0.585434	-1.82043	0.0686939	0.633157	Prkab2
ENSMUSG00000041328	39.4705	-0.76424	0.418319	-1.82693	0.0677104	0.633157	Pcf11
ENSMUSG00000041773	11.4773	1.49125	0.818645	1.8216	0.0685152	0.633157	Enc1
ENSMUSG00000043683	28.8347	-1.33477	0.731816	-1.82391	0.068165	0.633157	Fem1a
ENSMUSG00000047539	9.26645	1.60593	0.882987	1.81875	0.0689494	0.633157	Fbxo28
ENSMUSG00000047766	6.61124	1.51738	0.836608	1.81373	0.0697197	0.633157	Lrrc49
ENSMUSG00000052214	2.43156	-1.85275	1.01863	-1.81887	0.0689314	0.633157	Opa3
ENSMUSG00000052726	4.08024	-1.69686	0.935547	-1.81376	0.0697144	0.633157	Kcnt2
ENSMUSG00000059555	13.046	-2.03704	1.1187	-1.8209	0.0686218	0.633157	Tor4a
ENSMUSG00000061838	4.87813	1.52428	0.839837	1.81497	0.069528	0.633157	Suclg2
ENSMUSG00000085784	23.7504	-0.710613	0.392129	-1.81219	0.069957	0.633157	Gm12158
ENSMUSG00000103037	3.10604	-2.18321	1.1944	-1.82787	0.0675689	0.633157	Pcdhgb1
ENSMUSG00000103996	8.34834	-1.83355	1.00857	-1.81798	0.0690679	0.633157	4833421G17Rik
ENSMUSG00000074305	111.85	-0.645507	0.356462	-1.81087	0.0701606	0.633547	Peak1
ENSMUSG00000027184	56.4242	-0.805709	0.445635	-1.808	0.0706062	0.633895	Caprin1
ENSMUSG00000041596	7.8423	-1.57603	0.871906	-1.80757	0.0706739	0.633895	Nlrp5-ps
ENSMUSG00000042659	265.387	-0.553281	0.306041	-1.80787	0.0706275	0.633895	Arrdc4
ENSMUSG00000051375	3.89417	1.60323	0.886853	1.80777	0.0706418	0.633895	Pcdh1
ENSMUSG00000061232	1155.79	0.275441	0.152368	1.80774	0.0706471	0.633895	H2-K1
ENSMUSG00000062825	1.92882	-0.884685	0.488928	-1.80944	0.0703829	0.633895	Actg1
ENSMUSG00000067928	5.15275	1.22669	0.678526	1.80788	0.0706257	0.633895	Zfp760
ENSMUSG00000001930	3.76042	-0.813991	0.450702	-1.80605	0.0709106	0.635408	Vwf
ENSMUSG00000020863	56.848	-0.783104	0.43391	-1.80476	0.0711123	0.635996	Luc7l3
ENSMUSG00000030208	104.998	-0.587723	0.325576	-1.80518	0.071047	0.635996	Emp1
ENSMUSG00000028898	22.6694	1.18585	0.657865	1.80258	0.0714542	0.637833	Trnau1ap
ENSMUSG00000037957	16.2849	-1.21859	0.675998	-1.80265	0.0714439	0.637833	Wdr20
ENSMUSG00000051355	16.7779	-1.02524	0.569237	-1.80107	0.0716915	0.63934	Commd1
ENSMUSG00000002778	37.2254	0.695545	0.386875	1.79785	0.0722004	0.641248	Kdelr1
ENSMUSG00000008348	72.1135	-0.524118	0.291436	-1.7984	0.0721144	0.641248	Ubc
ENSMUSG00000022639	9.34107	1.30421	0.725351	1.79804	0.0721703	0.641248	Dubr
ENSMUSG00000031146	2.43341	-1.72143	0.957538	-1.79776	0.0722147	0.641248	Plp2
ENSMUSG00000034863	2.1414	-1.52361	0.847606	-1.79755	0.0722485	0.641248	Ano8
ENSMUSG00000023932	13.816	-0.906209	0.504818	-1.79512	0.0726344	0.641626	Cdc5l
ENSMUSG00000024841	10.6856	-1.60686	0.894747	-1.79588	0.0725138	0.641626	Eif1ad
ENSMUSG00000025260	16.2169	1.55319	0.865056	1.79548	0.0725778	0.641626	Hsd17b10
ENSMUSG00000033813	5.08054	-0.972133	0.541202	-1.79625	0.0724554	0.641626	Tcea1
ENSMUSG00000038685	20.5467	-1.43449	0.798387	-1.79674	0.0723772	0.641626	Rtel1
ENSMUSG00000010051	2.59484	-1.91232	1.06612	-1.79372	0.0728572	0.641894	Hyal1
ENSMUSG00000024137	18.3047	-1.32974	0.741541	-1.79321	0.0729394	0.641894	E4f1
ENSMUSG00000035614	14.2406	-1.18056	0.658333	-1.79326	0.0729316	0.641894	Togaram1
ENSMUSG00000056608	67.4448	-0.619809	0.345505	-1.79392	0.0728253	0.641894	Chd9
ENSMUSG00000002949	14.4321	1.24608	0.695167	1.79249	0.0730545	0.641959	Timm44
ENSMUSG00000058388	3.89155	-1.66253	0.927818	-1.79188	0.0731528	0.641959	Phtf1
ENSMUSG00000059796	28.3446	-0.846268	0.472257	-1.79196	0.0731388	0.641959	Eif4a1
ENSMUSG00000060038	10.3177	-1.69217	0.945028	-1.79061	0.0733562	0.64314	Dhps
ENSMUSG00000019558	4.32462	-1.58433	0.886388	-1.7874	0.0738727	0.645405	Slc6a8
ENSMUSG00000024169	9.60136	1.62079	0.906843	1.78729	0.0738908	0.645405	Ift140
ENSMUSG00000032352	4.44532	1.8328	1.02544	1.78733	0.0738834	0.645405	Lrrc1
ENSMUSG00000033208	31.6824	-1.23326	0.690014	-1.78729	0.0738904	0.645405	S100b
ENSMUSG00000021785	32.8237	0.967239	0.541651	1.78572	0.0741442	0.645808	Ngly1
ENSMUSG00000024319	16.8499	-1.22584	0.68632	-1.7861	0.0740825	0.645808	Vps52
ENSMUSG00000027263	12.2054	1.36213	0.762754	1.7858	0.0741317	0.645808	Tubgcp4
ENSMUSG00000017009	23.8207	-0.788114	0.441507	-1.78506	0.0742523	0.646147	Sdc4
ENSMUSG00000015656	73.5271	-0.624303	0.349924	-1.78411	0.0744057	0.646279	Hspa8
ENSMUSG00000039899	8.45685	-1.28008	0.717348	-1.78446	0.0743495	0.646279	Fgl2
ENSMUSG00000064325	6.68188	-2.00332	1.12332	-1.78339	0.0745224	0.646691	Hhip
ENSMUSG00000079197	6.32389	0.844551	0.473744	1.78272	0.0746324	0.647044	Psme2
ENSMUSG00000005949	6.35441	-1.37989	0.775989	-1.77823	0.0753655	0.647499	Ctns
ENSMUSG00000019907	45.8764	-0.723306	0.407062	-1.7769	0.0755854	0.647499	Ppp1r12a
ENSMUSG00000020232	5.17308	1.31022	0.737229	1.77723	0.075531	0.647499	Hmg20b
ENSMUSG00000021493	27.2152	-0.978825	0.550444	-1.77825	0.0753632	0.647499	Pdlim7
ENSMUSG00000022708	288.713	-0.409909	0.23025	-1.78028	0.0750301	0.647499	Zbtb20
ENSMUSG00000025373	24.9915	1.20103	0.67493	1.77949	0.0751594	0.647499	Rnf41
ENSMUSG00000027646	11.7313	-1.13672	0.638391	-1.7806	0.0749781	0.647499	Src
ENSMUSG00000029528	2.9674	1.48092	0.832127	1.77968	0.0751291	0.647499	Pxn
ENSMUSG00000031534	11.0269	1.72239	0.968371	1.77865	0.0752972	0.647499	Smim19
ENSMUSG00000033152	13.8455	-1.10107	0.619631	-1.77698	0.0755707	0.647499	Podxl2
ENSMUSG00000034254	10.5907	-1.13441	0.638297	-1.77724	0.0755279	0.647499	Agpat1
ENSMUSG00000036570	36.9999	0.511232	0.287062	1.78091	0.0749273	0.647499	Fxyd1
ENSMUSG00000102523	29.8315	-1.1864	0.665859	-1.78176	0.0747885	0.647499	Gm37783
ENSMUSG00000002108	6.5237	1.85058	1.04204	1.77592	0.0757464	0.64769	Nr1h3
ENSMUSG00000015647	17.7122	-1.26676	0.713214	-1.77613	0.0757109	0.64769	Lama5
ENSMUSG00000021327	45.4058	-0.915228	0.515569	-1.77518	0.0758684	0.64814	Zkscan3
ENSMUSG00000035629	7.44794	-1.53792	0.866711	-1.77443	0.0759925	0.648608	Rubcn
ENSMUSG00000035284	44.2006	-0.799739	0.45103	-1.77314	0.0762054	0.649832	Vps13c
ENSMUSG00000017764	2.45384	1.86134	1.05066	1.77158	0.0764636	0.650892	Zswim1
ENSMUSG00000021775	54.4967	-0.64352	0.363449	-1.77059	0.0766288	0.650892	Nr1d2
ENSMUSG00000033467	5.09169	1.54619	0.873011	1.7711	0.0765444	0.650892	Crlf2
ENSMUSG00000034647	80.6238	-0.579633	0.327421	-1.7703	0.0766779	0.650892	Ankrd12
ENSMUSG00000104369	5.07077	-2.06401	1.16559	-1.77079	0.0765962	0.650892	Gm38082
ENSMUSG00000040043	25.0611	0.864223	0.488719	1.76834	0.0770035	0.653062	Rbms2
ENSMUSG00000017978	64.1004	0.197704	0.111865	1.76735	0.0771688	0.653871	Cadps2
ENSMUSG00000054414	36.0617	-0.764644	0.432861	-1.76649	0.0773139	0.654507	Slc30a7
ENSMUSG00000016382	10.7109	1.04992	0.594791	1.76518	0.0775332	0.65456	Pls3
ENSMUSG00000017707	346.056	0.43591	0.246917	1.76541	0.0774952	0.65456	Serinc3
ENSMUSG00000020849	54.2403	-0.54217	0.307735	-1.76181	0.0781019	0.65456	Ywhae
ENSMUSG00000020864	16.4368	-1.49077	0.84486	-1.76452	0.0776444	0.65456	Ankrd40
ENSMUSG00000024661	472.994	0.337707	0.191579	1.76276	0.0779416	0.65456	Fth1
ENSMUSG00000027671	15.2829	1.38182	0.782915	1.76497	0.0775686	0.65456	Actl6a
ENSMUSG00000029422	67.6963	-0.666126	0.378167	-1.76146	0.0781606	0.65456	Rsrc2
ENSMUSG00000031748	29.3019	-0.925671	0.52536	-1.76197	0.0780737	0.65456	Gnao1
ENSMUSG00000039684	6.85026	1.07717	0.611025	1.76288	0.07792	0.65456	Gm5422
ENSMUSG00000045098	71.3445	-0.686678	0.389552	-1.76273	0.0779452	0.65456	Kmt5b
ENSMUSG00000084098	1.90854	-1.33986	0.760233	-1.76243	0.077997	0.65456	Gm13422
ENSMUSG00000090119	3.01259	0.771519	0.437899	1.76187	0.0780919	0.65456	Gm8185
ENSMUSG00000009733	11.4951	-1.14564	0.651321	-1.75894	0.0785875	0.656371	Tfcp2
ENSMUSG00000023411	13.9689	1.15892	0.658722	1.75934	0.0785195	0.656371	Nfatc4
ENSMUSG00000025006	10.3243	-1.24346	0.706656	-1.75964	0.0784681	0.656371	Sorbs1
ENSMUSG00000001473	7.58416	1.35397	0.771849	1.75419	0.0793979	0.656797	Tubb6
ENSMUSG00000014956	35.698	-0.785931	0.447662	-1.75564	0.0791507	0.656797	Ppp1cb
ENSMUSG00000020627	13.783	0.983498	0.560986	1.75316	0.0795747	0.656797	Klhl29
ENSMUSG00000024104	19.1966	0.954069	0.543796	1.75446	0.0793517	0.656797	Washc2
ENSMUSG00000030057	178.288	0.510472	0.291219	1.75288	0.0796224	0.656797	Cnbp
ENSMUSG00000030761	3.91765	-1.89662	1.08167	-1.75343	0.0795287	0.656797	Myo7a
ENSMUSG00000033308	3.01241	-1.82504	1.039	-1.75654	0.0789961	0.656797	Dpyd
ENSMUSG00000034165	54.312	-0.751618	0.427824	-1.75684	0.078945	0.656797	Ccnd3
ENSMUSG00000039747	21.7629	-1.05532	0.600458	-1.75752	0.0788286	0.656797	Orai2
ENSMUSG00000040297	27.418	-0.942949	0.537746	-1.75352	0.0795122	0.656797	Suco
ENSMUSG00000049516	22.7476	-1.09058	0.620355	-1.75799	0.0787493	0.656797	Spty2d1
ENSMUSG00000083126	2.12095	-1.18823	0.676794	-1.75568	0.0791434	0.656797	Gm14109
ENSMUSG00000094936	11.5803	1.19936	0.684117	1.75316	0.0795753	0.656797	Rbm4
ENSMUSG00000099597	7.3885	1.3152	0.749748	1.75419	0.0793975	0.656797	Gm28933
ENSMUSG00000014905	23.307	-1.16213	0.663789	-1.75076	0.0799881	0.657056	Dnajb9
ENSMUSG00000021461	44.2874	-0.986175	0.563576	-1.74985	0.0801441	0.657056	Fancc
ENSMUSG00000025351	132.805	0.395187	0.225599	1.75172	0.079822	0.657056	Cd63
ENSMUSG00000032579	4.22908	-1.81996	1.0389	-1.7518	0.0798074	0.657056	Hemk1
ENSMUSG00000036644	29.4794	0.886802	0.506909	1.74943	0.0802163	0.657056	Tbc1d9b
ENSMUSG00000051627	3.42382	-1.54469	0.882576	-1.75021	0.0800817	0.657056	Hist1h1e
ENSMUSG00000059901	52.3442	-0.886713	0.506492	-1.75069	0.0799986	0.657056	Adamts14
ENSMUSG00000063281	5.74402	1.90722	1.09018	1.74945	0.0802126	0.657056	Zfp35
ENSMUSG00000036819	5.9021	-1.57299	0.899608	-1.74852	0.0803733	0.657191	Jmjd4
ENSMUSG00000038658	47.9954	-0.865461	0.494898	-1.74877	0.0803312	0.657191	Ric1
ENSMUSG00000027167	4.52712	1.62972	0.932402	1.74787	0.0804864	0.657541	Elp4
ENSMUSG00000097048	9.34696	-1.48037	0.847392	-1.74697	0.0806419	0.658235	1600020E01Rik
ENSMUSG00000026626	11.8648	1.06908	0.612362	1.74583	0.0808409	0.659284	Ppp2r5a
ENSMUSG00000042406	89.727	-0.821945	0.471099	-1.74474	0.0810302	0.659676	Atf4
ENSMUSG00000044496	12.9273	-1.37381	0.787258	-1.74506	0.0809745	0.659676	2510039O18Rik
ENSMUSG00000005881	83.278	0.669458	0.383796	1.74431	0.0811059	0.659718	Ergic3
ENSMUSG00000031226	7.20945	-1.55896	0.893967	-1.74387	0.0811817	0.65976	Pbdc1
ENSMUSG00000026484	27.0637	-1.00584	0.576998	-1.74323	0.0812936	0.660096	Rnf2
ENSMUSG00000030747	5.38302	-1.70064	0.975996	-1.74247	0.0814269	0.660535	Dgat2
ENSMUSG00000039599	13.3365	1.19988	0.68875	1.74211	0.0814891	0.660535	Fam149b
ENSMUSG00000021929	8.56876	-1.47365	0.846733	-1.74039	0.0817898	0.662399	Kpna3
ENSMUSG00000035545	154.072	-0.536518	0.308375	-1.73982	0.0818901	0.662636	Leng8
ENSMUSG00000022228	35.6889	-0.883564	0.508218	-1.73855	0.0821133	0.663553	Zscan26
ENSMUSG00000029559	11.2513	1.59801	0.919257	1.73837	0.0821454	0.663553	2210016L21Rik
ENSMUSG00000031103	30.9733	-0.992191	0.570903	-1.73793	0.0822228	0.663605	Elf4
ENSMUSG00000028180	62.2533	-0.693758	0.399722	-1.7356	0.0826343	0.666351	Zranb2
ENSMUSG00000068566	59.1952	0.671888	0.387343	1.73461	0.08281	0.667192	Myadm
ENSMUSG00000014554	14.0319	1.34693	0.777814	1.73168	0.0833305	0.670807	Dguok
ENSMUSG00000016534	241.355	-0.330907	0.191221	-1.7305	0.0835416	0.671611	Lamp2
ENSMUSG00000017754	57.6006	-0.674338	0.389811	-1.72991	0.0836459	0.671611	Pltp
ENSMUSG00000028923	57.0868	-0.874339	0.50541	-1.72996	0.0836373	0.671611	Necap2
ENSMUSG00000054509	12.8742	0.967843	0.559608	1.7295	0.0837195	0.671625	Parp4
ENSMUSG00000013236	58.9212	-0.662427	0.383255	-1.72842	0.0839128	0.672226	Ptprs
ENSMUSG00000040760	41.9301	-0.814682	0.471383	-1.72828	0.0839383	0.672226	Appl1
ENSMUSG00000060475	14.6476	-0.41231	0.238655	-1.72764	0.0840529	0.672567	Wtap
ENSMUSG00000023977	60.2209	-0.655724	0.379801	-1.72649	0.0842591	0.673486	Ubr2
ENSMUSG00000037447	46.86	-0.92206	0.534281	-1.7258	0.0843839	0.673486	Arid5a
ENSMUSG00000097707	7.41092	-1.5754	0.912817	-1.72587	0.084371	0.673486	Gm26742
ENSMUSG00000032340	55.401	-0.837103	0.485363	-1.72469	0.0845826	0.674325	Neo1
ENSMUSG00000037674	16.7546	1.18414	0.68685	1.72401	0.0847055	0.674325	Rfx7
ENSMUSG00000052331	38.7211	-0.879474	0.510108	-1.72409	0.0846912	0.674325	Ankrd44
ENSMUSG00000021192	20.2831	0.992936	0.576341	1.72283	0.0849201	0.675458	Golga5
ENSMUSG00000039531	11.5877	1.17229	0.680674	1.72224	0.0850256	0.675722	Zufsp
ENSMUSG00000089989	6.81953	-1.18214	0.686637	-1.72164	0.0851341	0.67601	Gm45713
ENSMUSG00000042492	20.4547	-1.30922	0.760673	-1.72113	0.0852275	0.676177	Tbc1d10b
ENSMUSG00000025736	12.0467	0.832457	0.484017	1.71989	0.0854524	0.677386	Jmjd8
ENSMUSG00000002345	14.8108	1.23984	0.721396	1.71866	0.085676	0.678583	Borcs8
ENSMUSG00000042208	9.53124	-1.40978	0.820552	-1.71809	0.0857805	0.678835	0610010F05Rik
ENSMUSG00000029780	16.2355	1.24581	0.725417	1.71737	0.0859109	0.679292	Nt5c3
ENSMUSG00000060376	14.1449	1.58385	0.922663	1.7166	0.0860515	0.679829	Bckdha
ENSMUSG00000029484	8.31724	-1.56338	0.911344	-1.71547	0.08626	0.6809	Anxa3
ENSMUSG00000031563	23.1971	-0.802695	0.468216	-1.71437	0.0864607	0.681333	Wwc2
ENSMUSG00000039108	7.43791	-1.13997	0.664828	-1.71469	0.0864023	0.681333	Lsm14b
ENSMUSG00000019338	16.3429	-1.22748	0.71619	-1.71391	0.0865456	0.681428	Zfp687
ENSMUSG00000020091	19.1733	0.989506	0.577508	1.71341	0.0866376	0.681579	Eif4ebp2
ENSMUSG00000026142	7.1297	-1.4931	0.871969	-1.71233	0.0868364	0.681791	Rhbdd1
ENSMUSG00000028567	8.8853	1.36422	0.797011	1.71168	0.0869565	0.681791	Txndc12
ENSMUSG00000038280	17.655	-1.18226	0.690593	-1.71195	0.086905	0.681791	Ostm1
ENSMUSG00000104476	6.20647	1.78413	1.04204	1.71214	0.0868703	0.681791	Gm38211
ENSMUSG00000022967	56.6954	-0.820231	0.479479	-1.71067	0.0871419	0.681929	Ifnar1
ENSMUSG00000023885	79.5277	-0.927352	0.542139	-1.71054	0.0871653	0.681929	Thbs2
ENSMUSG00000025730	6.95425	1.78206	1.04253	1.70936	0.0873834	0.681929	Rab40c
ENSMUSG00000031750	126.886	0.607166	0.355217	1.70928	0.0873987	0.681929	Il34
ENSMUSG00000062822	25.4195	-0.861399	0.503877	-1.70954	0.0873507	0.681929	4833420G17Rik
ENSMUSG00000063455	6.46192	1.77768	1.0403	1.70882	0.0874848	0.681929	D630045J12Rik
ENSMUSG00000068823	122.736	-0.53271	0.311735	-1.70885	0.087478	0.681929	Csde1
ENSMUSG00000030499	9.70246	-1.40848	0.824575	-1.70812	0.0876132	0.682167	Kctd15
ENSMUSG00000056131	6.90301	-1.87194	1.09607	-1.70787	0.0876613	0.682167	Pgm3
ENSMUSG00000030917	47.3699	0.918709	0.538313	1.70664	0.0878881	0.682385	Tmem159
ENSMUSG00000032253	139.774	-0.568778	0.333141	-1.70732	0.087763	0.682385	Phip
ENSMUSG00000079555	20.9045	-1.21949	0.714601	-1.70654	0.0879083	0.682385	Haus3
ENSMUSG00000000776	6.91867	1.50039	0.882166	1.7008	0.0889808	0.682479	Polr3d
ENSMUSG00000005360	25.5109	-1.42497	0.835945	-1.70463	0.0882641	0.682479	Slc1a3
ENSMUSG00000019467	43.5115	-0.948135	0.556847	-1.70268	0.0886272	0.682479	Arhgef25
ENSMUSG00000020275	10.6473	-1.38038	0.809271	-1.70571	0.0880621	0.682479	Rel
ENSMUSG00000020594	30.807	-0.689751	0.405805	-1.69971	0.0891855	0.682479	Pum2
ENSMUSG00000022892	211.592	0.314285	0.184714	1.70147	0.0888544	0.682479	App
ENSMUSG00000025203	25.216	-1.00537	0.591444	-1.69986	0.0891564	0.682479	Scd2
ENSMUSG00000027341	5.06593	-1.34068	0.789578	-1.69796	0.0895146	0.682479	Tmem230
ENSMUSG00000029587	11.6947	-1.45075	0.854483	-1.69781	0.0895429	0.682479	Zfp12
ENSMUSG00000030083	5.26645	-1.55379	0.913803	-1.70035	0.0890647	0.682479	Abtb1
ENSMUSG00000030967	30.6778	-0.776312	0.457129	-1.69823	0.0894637	0.682479	Zranb1
ENSMUSG00000031715	12.5309	-0.977722	0.575429	-1.69912	0.0892968	0.682479	Smarca5
ENSMUSG00000031924	27.7929	0.856989	0.502621	1.70504	0.0881866	0.682479	Cyb5b
ENSMUSG00000032497	19.7923	-1.01907	0.598872	-1.70165	0.0888219	0.682479	Lrrfip2
ENSMUSG00000032571	22.0202	1.08052	0.636311	1.6981	0.0894887	0.682479	Pik3r4
ENSMUSG00000032788	12.7754	1.3632	0.803056	1.69751	0.0896001	0.682479	Pdxk
ENSMUSG00000033916	26.7858	0.675077	0.396352	1.70322	0.0885261	0.682479	Chmp2a
ENSMUSG00000033972	2.78921	-1.57549	0.924804	-1.70359	0.0884581	0.682479	Zfp944
ENSMUSG00000057963	22.973	1.11663	0.655242	1.70414	0.0883541	0.682479	Itpk1
ENSMUSG00000061882	6.82845	-1.40856	0.826383	-1.70449	0.0882902	0.682479	Ccdc62
ENSMUSG00000098973	2083.75	-0.165479	0.0972932	-1.70082	0.0889759	0.682479	Mir6236
ENSMUSG00000102939	1.79893	1.69482	0.996536	1.70072	0.0889962	0.682479	Gm38111
ENSMUSG00000106798	4.72343	-1.5696	0.924175	-1.69838	0.0894366	0.682479	Gm43275
ENSMUSG00000015127	6.3185	-1.29409	0.763736	-1.69442	0.0901855	0.683242	Unkl
ENSMUSG00000024155	3.57458	-1.74015	1.02754	-1.69351	0.0903581	0.683242	Meiob
ENSMUSG00000029406	4.46012	1.59588	0.941529	1.69499	0.0900781	0.683242	Pitpnm2
ENSMUSG00000029454	1.67782	-1.48965	0.879546	-1.69365	0.090331	0.683242	Mapkapk5
ENSMUSG00000030166	5.43012	1.67403	0.986916	1.69623	0.0898426	0.683242	Rad52
ENSMUSG00000033960	8.84716	1.28598	0.759181	1.6939	0.0902837	0.683242	Jcad
ENSMUSG00000036087	17.1904	-0.912648	0.53861	-1.69445	0.0901795	0.683242	Slain2
ENSMUSG00000037236	67.6726	-0.55364	0.32652	-1.69558	0.0899661	0.683242	Matr3
ENSMUSG00000051950	7.1738	-1.54997	0.914461	-1.69495	0.0900842	0.683242	B3glct
ENSMUSG00000038967	26.1189	1.38191	0.816679	1.6921	0.0906263	0.684547	Pdk2
ENSMUSG00000078153	12.338	0.839638	0.496288	1.69184	0.0906772	0.684547	Psme2b
ENSMUSG00000003847	158.489	-0.449098	0.265703	-1.69023	0.0909842	0.685209	Nfat5
ENSMUSG00000022404	29.4511	0.83733	0.495508	1.68984	0.0910582	0.685209	Slc25a17
ENSMUSG00000022844	23.624	1.22958	0.727547	1.69003	0.091022	0.685209	Pdia5
ENSMUSG00000023980	6.85061	1.68608	0.997583	1.69016	0.0909966	0.685209	Taf8
ENSMUSG00000020492	5.46006	-1.34147	0.794127	-1.68924	0.0911733	0.685411	Ska2
ENSMUSG00000029754	3.66624	-1.45522	0.861731	-1.68872	0.0912726	0.685411	Dlx6
ENSMUSG00000048911	11.5748	0.951906	0.563741	1.68855	0.091305	0.685411	Rnf24
ENSMUSG00000003308	12.6003	-1.11673	0.661853	-1.68727	0.0915511	0.686605	Keap1
ENSMUSG00000024142	5.02094	-1.58171	0.93761	-1.68696	0.091611	0.686605	Mlst8
ENSMUSG00000053768	18.4836	-1.13159	0.671384	-1.68546	0.0919002	0.688221	Chchd3
ENSMUSG00000004945	8.4807	1.29444	0.768315	1.68477	0.0920328	0.688662	Tmem242
ENSMUSG00000033526	2.94623	-1.91706	1.13818	-1.68432	0.0921201	0.688763	Ppip5k1
ENSMUSG00000026103	40.8616	-0.736632	0.437529	-1.68362	0.0922552	0.689222	Gls
ENSMUSG00000029009	24.8294	-1.03431	0.614611	-1.68287	0.0924007	0.689758	Mthfr
ENSMUSG00000028292	11.4462	1.30452	0.775371	1.68244	0.092483	0.689822	Rars2
ENSMUSG00000001173	27.9948	-0.98846	0.588739	-1.67895	0.0931627	0.689935	Ocrl
ENSMUSG00000022064	18.8557	-1.07953	0.642059	-1.68135	0.0926947	0.689935	Pibf1
ENSMUSG00000022109	8.79504	1.43367	0.852838	1.68106	0.092752	0.689935	Med4
ENSMUSG00000027361	6.74478	-1.48179	0.882108	-1.67982	0.0929919	0.689935	Gabpb1
ENSMUSG00000028057	41.0982	1.0713	0.637149	1.6814	0.0926852	0.689935	Rit1
ENSMUSG00000038126	5.92886	1.65438	0.98512	1.67937	0.0930803	0.689935	Mphosph9
ENSMUSG00000041567	17.95	-1.02406	0.609809	-1.67932	0.0930907	0.689935	Serpina12
ENSMUSG00000049191	2.88487	-1.45378	0.864938	-1.68079	0.092803	0.689935	Rtl5
ENSMUSG00000106386	4.69259	-1.86387	1.10965	-1.6797	0.0930155	0.689935	Gm42991
ENSMUSG00000002012	41.6902	-0.199801	0.119306	-1.67469	0.0939946	0.69049	Pnck
ENSMUSG00000012640	5.79086	-1.7279	1.03027	-1.67714	0.0935157	0.69049	Zfp715
ENSMUSG00000018068	7.77069	-1.56636	0.933816	-1.67738	0.0934689	0.69049	Ints2
ENSMUSG00000020284	5.72017	-1.74157	1.04143	-1.67229	0.0944667	0.69049	1810043G02Rik
ENSMUSG00000025289	89.3688	0.582589	0.348101	1.67362	0.0942054	0.69049	Prdx4
ENSMUSG00000030882	3.51066	-1.4859	0.888715	-1.67196	0.0945321	0.69049	Dnhd1
ENSMUSG00000032402	9.943	-1.45566	0.87012	-1.67294	0.0943385	0.69049	Smad3
ENSMUSG00000037286	49.1689	-0.662888	0.395302	-1.67692	0.093559	0.69049	Stag1
ENSMUSG00000037295	65.9621	-0.690342	0.413029	-1.67141	0.0946403	0.69049	Ldlrap1
ENSMUSG00000038740	4.54604	-1.55754	0.928266	-1.6779	0.0933671	0.69049	Mvb12b
ENSMUSG00000040054	65.9288	-0.737191	0.440157	-1.67484	0.0939666	0.69049	Baz2a
ENSMUSG00000046822	6.96778	-1.69896	1.01603	-1.67216	0.0944933	0.69049	Slc39a3
ENSMUSG00000047193	32.4399	-1.1309	0.676615	-1.67141	0.0946414	0.69049	Dync2h1
ENSMUSG00000048175	8.2273	1.69151	1.01108	1.67296	0.0943347	0.69049	Asb8
ENSMUSG00000059995	12.7303	-1.22531	0.732107	-1.67368	0.0941944	0.69049	Atxn7l3
ENSMUSG00000062867	3.69073	-1.12255	0.670151	-1.67506	0.0939215	0.69049	Impdh2
ENSMUSG00000079491	3.6637	-0.970709	0.579752	-1.67435	0.094061	0.69049	H2-T10
ENSMUSG00000081888	7.04588	-0.897427	0.536509	-1.67271	0.0943837	0.69049	Spcs2-ps
ENSMUSG00000095908	2.91732	0.778196	0.46448	1.67541	0.0938529	0.69049	Gm5576
ENSMUSG00000002107	2.24011	-1.48056	0.88956	-1.66438	0.0960372	0.691429	Celf2
ENSMUSG00000006403	1.36026	1.60316	0.963022	1.66472	0.0959686	0.691429	Adamts4
ENSMUSG00000006678	7.6655	-1.67313	1.00448	-1.66567	0.0957787	0.691429	Pola1
ENSMUSG00000021589	10.9398	1.2167	0.729243	1.66844	0.0952285	0.691429	Rhobtb3
ENSMUSG00000021972	19.9966	-0.969429	0.582571	-1.66405	0.0961017	0.691429	Hmbox1
ENSMUSG00000022000	18.112	-1.03067	0.618882	-1.66537	0.0958382	0.691429	Zc3h13
ENSMUSG00000024713	30.1114	0.96262	0.576852	1.66875	0.0951675	0.691429	Pcsk5
ENSMUSG00000025880	22.1768	-0.668226	0.400648	-1.66786	0.0953429	0.691429	Smad7
ENSMUSG00000026827	9.54169	-1.29777	0.777238	-1.66972	0.0949742	0.691429	Gpd2
ENSMUSG00000027673	15.4926	-1.07191	0.644051	-1.66433	0.0960469	0.691429	Ndufb5
ENSMUSG00000030811	2.72255	-1.34085	0.804161	-1.66738	0.095438	0.691429	Fbxl19
ENSMUSG00000032407	55.4934	-0.628053	0.376744	-1.66706	0.0955031	0.691429	U2surp
ENSMUSG00000034525	29.821	-0.836619	0.501485	-1.66828	0.0952592	0.691429	Ice1
ENSMUSG00000038708	25.3807	-0.879208	0.52812	-1.66479	0.0959554	0.691429	Golga4
ENSMUSG00000039501	35.5871	0.796858	0.478829	1.66418	0.0960764	0.691429	Znfx1
ENSMUSG00000041483	19.7656	-1.17523	0.705246	-1.66641	0.0956322	0.691429	Zfp281
ENSMUSG00000042807	3.72797	-1.72669	1.03661	-1.66571	0.095771	0.691429	Hecw2
ENSMUSG00000048450	6.01975	1.75242	1.04933	1.67005	0.0949098	0.691429	Msx1
ENSMUSG00000026197	6.23831	-1.40891	0.847338	-1.66275	0.0963622	0.692766	Zfand2b
ENSMUSG00000041559	3.38067	0.792919	0.476977	1.66238	0.0964357	0.692766	Fmod
ENSMUSG00000002980	3.12958	-1.54324	0.930218	-1.65901	0.0971133	0.693527	Bcam
ENSMUSG00000006395	8.58886	1.42867	0.860337	1.6606	0.0967942	0.693527	Hyi
ENSMUSG00000021975	5.43834	1.47122	0.886726	1.65916	0.0970839	0.693527	Ints9
ENSMUSG00000022476	8.76687	-1.63335	0.984565	-1.65895	0.0971253	0.693527	Polr3h
ENSMUSG00000024346	8.10331	1.34426	0.809218	1.66118	0.0966766	0.693527	Pfdn1
ENSMUSG00000037487	129.503	-0.423828	0.255253	-1.66042	0.0968292	0.693527	Ubr5
ENSMUSG00000038346	15.5438	-0.924783	0.557467	-1.6589	0.0971354	0.693527	Zfp384
ENSMUSG00000048120	4.19929	1.38852	0.836532	1.65986	0.096943	0.693527	Entpd1
ENSMUSG00000031657	5.17862	-1.55222	0.936284	-1.65786	0.0973462	0.694502	Heatr3
ENSMUSG00000037411	3.85845	-1.58345	0.955656	-1.65693	0.0975346	0.695315	Serpine1
ENSMUSG00000005198	61.6252	-0.569419	0.344161	-1.65451	0.098023	0.695903	Polr2a
ENSMUSG00000007659	11.4471	-1.13732	0.687252	-1.65489	0.0979474	0.695903	Bcl2l1
ENSMUSG00000015659	3.14778	-1.82748	1.10457	-1.65447	0.0980312	0.695903	Serac1
ENSMUSG00000019359	437.968	0.370444	0.223696	1.65601	0.0977193	0.695903	Gdpd2
ENSMUSG00000021994	5.71394	-1.61352	0.974549	-1.65565	0.0977918	0.695903	Wnt5a
ENSMUSG00000053964	17.2429	-1.28656	0.777703	-1.65431	0.0980638	0.695903	Lgals4
ENSMUSG00000037104	35.3132	-0.914214	0.553073	-1.65297	0.0983367	0.696782	Socs5
ENSMUSG00000043631	10.6316	-1.24416	0.752679	-1.65298	0.0983356	0.696782	Ecm2
ENSMUSG00000005142	36.1491	0.843863	0.510771	1.65213	0.0985073	0.697461	Man2b1
ENSMUSG00000010277	60.7531	-0.796546	0.482411	-1.65118	0.0987027	0.698316	2610507B11Rik
ENSMUSG00000034485	5.65267	1.59033	0.963367	1.6508	0.0987788	0.698326	Uaca
ENSMUSG00000022019	22.7745	0.883187	0.536352	1.64666	0.0996288	0.698742	Tdrd3
ENSMUSG00000023571	7.83407	1.48552	0.90127	1.64825	0.0993013	0.698742	C1qtnf12
ENSMUSG00000023942	139.56	0.50858	0.308885	1.6465	0.0996601	0.698742	Slc29a1
ENSMUSG00000029810	983.576	0.293868	0.178151	1.64955	0.099036	0.698742	Tmem176b
ENSMUSG00000030706	3.81803	-1.219	0.740158	-1.64694	0.0995699	0.698742	Mrpl48
ENSMUSG00000031737	4.26429	-1.73956	1.05477	-1.64922	0.0991016	0.698742	Irx5
ENSMUSG00000032998	31.7356	-0.768529	0.465895	-1.64958	0.0990298	0.698742	Foxj3
ENSMUSG00000037490	2.44907	1.81928	1.10461	1.64699	0.0995596	0.698742	Slc2a12
ENSMUSG00000038047	3.12444	-1.81046	1.09931	-1.6469	0.0995782	0.698742	Haus6
ENSMUSG00000062312	10.5854	-1.21079	0.73484	-1.64769	0.099416	0.698742	Erbb2
ENSMUSG00000097296	9.40455	-1.44383	0.875761	-1.64866	0.099217	0.698742	Gm26532
ENSMUSG00000015536	47.5341	-0.972529	0.590817	-1.64608	0.0997482	0.698836	Mocs2
ENSMUSG00000024646	72.8422	0.589139	0.358575	1.643	0.100383	0.70118	Cyb5a
ENSMUSG00000036879	17.2932	0.914111	0.55629	1.64323	0.100336	0.70118	Phkb
ENSMUSG00000037326	3.5995	-1.56132	0.950188	-1.64317	0.100348	0.70118	Capn15
ENSMUSG00000074165	5.31246	-1.68389	1.02466	-1.64337	0.100307	0.70118	Zfp788
ENSMUSG00000039911	60.7643	-0.851385	0.518328	-1.64256	0.100474	0.70129	Spsb1
ENSMUSG00000054648	12.3475	1.4122	0.860156	1.6418	0.100632	0.701873	Zfp869
ENSMUSG00000047965	2.55379	0.60113	0.366275	1.6412	0.100756	0.702215	Rpl9-ps7
ENSMUSG00000026917	26.6447	1.12728	0.687276	1.64022	0.10096	0.70311	Wdr5
ENSMUSG00000019471	26.6351	0.890679	0.543242	1.63956	0.101096	0.703533	Cdc37
ENSMUSG00000022337	53.5908	0.60206	0.367466	1.63841	0.101336	0.704675	Emc2
ENSMUSG00000026640	266.938	-0.479031	0.292512	-1.63765	0.101495	0.704733	Plxna2
ENSMUSG00000085133	5.24462	1.70755	1.04267	1.63768	0.101489	0.704733	B930095G15Rik
ENSMUSG00000030816	13.1013	1.16905	0.714718	1.63568	0.101907	0.707071	Rnf40
ENSMUSG00000002820	4.36051	-1.73502	1.06208	-1.63361	0.102342	0.707982	Atg4d
ENSMUSG00000031605	2.01895	-1.53144	0.937461	-1.63361	0.102341	0.707982	Klhl2
ENSMUSG00000060703	179.061	0.443812	0.271518	1.63456	0.102141	0.707982	Cd302
ENSMUSG00000071317	10.0034	-1.65562	1.01315	-1.63414	0.10223	0.707982	Bves
ENSMUSG00000004105	34.463	1.09563	0.671464	1.6317	0.102742	0.708953	Angptl2
ENSMUSG00000022875	171.278	0.523536	0.320893	1.6315	0.102785	0.708953	Kng1
ENSMUSG00000041560	16.5615	-1.02259	0.626629	-1.6319	0.102702	0.708953	Nop53
ENSMUSG00000102784	5.79014	1.62603	0.99609	1.63241	0.102594	0.708953	Gm38251
ENSMUSG00000033429	3.67139	1.28697	0.789198	1.63073	0.102948	0.709551	Mcee
ENSMUSG00000001211	53.0998	-0.671814	0.412613	-1.62819	0.103484	0.710101	Agpat3
ENSMUSG00000031508	29.7105	0.883744	0.542719	1.62837	0.103447	0.710101	Ankrd10
ENSMUSG00000031592	57.3059	-0.644194	0.395566	-1.62854	0.103411	0.710101	Pcm1
ENSMUSG00000049553	9.89576	-1.37547	0.844383	-1.62897	0.10332	0.710101	Polr1a
ENSMUSG00000054716	13.5499	1.36901	0.839911	1.62994	0.103114	0.710101	Zfp771
ENSMUSG00000078941	3.20812	1.475	0.905454	1.62901	0.10331	0.710101	Ak6
ENSMUSG00000024143	17.9804	-0.870743	0.535309	-1.62662	0.103818	0.711317	Rhoq
ENSMUSG00000062542	1.94537	1.50148	0.923425	1.62599	0.103952	0.711317	Syt9
ENSMUSG00000072612	4.18238	-1.2618	0.776053	-1.62593	0.103965	0.711317	Gm10382
ENSMUSG00000090021	9.42219	-0.927863	0.570564	-1.62622	0.103902	0.711317	Gm6493
ENSMUSG00000026037	7.27694	1.38154	0.850459	1.62446	0.104277	0.712299	Orc2
ENSMUSG00000029110	29.8923	0.825155	0.508267	1.62347	0.10449	0.712299	Rnf4
ENSMUSG00000036781	10.4484	0.74385	0.458116	1.62372	0.104436	0.712299	Rps27l
ENSMUSG00000052698	143.364	-0.506865	0.312084	-1.62413	0.104348	0.712299	Tln2
ENSMUSG00000105728	7.83042	-1.52386	0.938247	-1.62415	0.104343	0.712299	Gm42819
ENSMUSG00000026987	77.5186	-0.608082	0.374722	-1.62275	0.104642	0.712818	Baz2b
ENSMUSG00000001627	49.5628	-0.884438	0.546115	-1.61951	0.105338	0.714092	Ifrd1
ENSMUSG00000002221	22.6851	-1.03578	0.641605	-1.61435	0.106451	0.714092	Paxip1
ENSMUSG00000006005	56.0973	-0.667575	0.412022	-1.62024	0.10518	0.714092	Tpr
ENSMUSG00000006276	21.4603	-0.8504	0.526683	-1.61463	0.10639	0.714092	Eps15l1
ENSMUSG00000009079	43.6792	-0.500493	0.310455	-1.61213	0.106935	0.714092	Ewsr1
ENSMUSG00000009281	71.3298	0.463002	0.286218	1.61765	0.105737	0.714092	Rarres2
ENSMUSG00000017765	78.6026	-0.629553	0.390398	-1.6126	0.106832	0.714092	Slc12a4
ENSMUSG00000018849	3.8413	1.56555	0.969633	1.61458	0.106402	0.714092	Wwc1
ENSMUSG00000020899	5.11399	-1.37612	0.850099	-1.61878	0.105495	0.714092	Pfas
ENSMUSG00000021276	3.91371	-1.53477	0.950595	-1.61453	0.106412	0.714092	Cinp
ENSMUSG00000022451	16.8696	-0.869254	0.536557	-1.62006	0.105219	0.714092	Twf1
ENSMUSG00000022574	5.13118	-1.67506	1.03359	-1.62062	0.105099	0.714092	Naprt
ENSMUSG00000027287	29.6388	0.914956	0.566269	1.61576	0.106146	0.714092	Snap23
ENSMUSG00000027634	21.1615	0.921742	0.571128	1.6139	0.106549	0.714092	Ndrg3
ENSMUSG00000028035	36.6425	-0.905335	0.55996	-1.61679	0.105924	0.714092	Dnajb4
ENSMUSG00000028073	8.06793	1.14559	0.710077	1.61333	0.106672	0.714092	Pear1
ENSMUSG00000028243	7.74496	1.42368	0.882579	1.61309	0.106724	0.714092	Ubxn2b
ENSMUSG00000028917	11.6964	-1.17841	0.730067	-1.61411	0.106503	0.714092	Plekhm2
ENSMUSG00000030527	46.108	-0.603575	0.373313	-1.61681	0.10592	0.714092	Crtc3
ENSMUSG00000030717	102.245	-0.544092	0.337493	-1.61216	0.106928	0.714092	Nupr1
ENSMUSG00000031511	14.3697	1.04887	0.650674	1.61197	0.106969	0.714092	Arhgef7
ENSMUSG00000031979	27.4493	0.894882	0.552221	1.62051	0.105122	0.714092	Cog2
ENSMUSG00000033542	17.1844	1.45883	0.904359	1.61311	0.106721	0.714092	Arhgef5
ENSMUSG00000037965	77.3779	-0.583965	0.36096	-1.61781	0.105704	0.714092	Zc3h7a
ENSMUSG00000041180	20.1385	-0.920644	0.570482	-1.6138	0.106571	0.714092	Hectd2
ENSMUSG00000061731	30.4092	-0.970653	0.598682	-1.62132	0.10495	0.714092	Ext1
ENSMUSG00000095403	3.45823	-0.640301	0.39559	-1.6186	0.105534	0.714092	Gm21092
ENSMUSG00000097139	9.9155	-1.18561	0.733911	-1.61547	0.10621	0.714092	Gm26626
ENSMUSG00000020430	8.0825	-1.09308	0.678573	-1.61085	0.107212	0.714697	Pes1
ENSMUSG00000022305	4.77073	1.46913	0.911965	1.61095	0.107191	0.714697	Lrp12
ENSMUSG00000020372	84.8085	-0.628875	0.390513	-1.61038	0.107315	0.714871	Rack1
ENSMUSG00000022537	3.68529	-1.65589	1.02904	-1.60916	0.107581	0.715621	Tmem44
ENSMUSG00000041846	27.581	-0.845878	0.525658	-1.60918	0.107577	0.715621	Ppp4r3a
ENSMUSG00000018378	15.9307	0.717039	0.446114	1.6073	0.107989	0.716805	Cuedc1
ENSMUSG00000045064	5.90511	1.66023	1.03292	1.60731	0.107985	0.716805	Zc2hc1c
ENSMUSG00000045671	13.0487	-0.79669	0.495556	-1.60767	0.107907	0.716805	Spred2
ENSMUSG00000085385	5.8449	-1.68504	1.04994	-1.6049	0.108516	0.719794	Snhg17
ENSMUSG00000020354	35.2027	-0.751108	0.468737	-1.60241	0.109065	0.720194	Sgcd
ENSMUSG00000021013	3.62273	-1.63658	1.02298	-1.59982	0.10964	0.720194	Ttc8
ENSMUSG00000022130	10.0108	1.37768	0.860397	1.60121	0.10933	0.720194	Tgds
ENSMUSG00000022761	25.893	-1.01219	0.632038	-1.60146	0.109274	0.720194	Lztr1
ENSMUSG00000026659	3.32275	1.57352	0.9822	1.60204	0.109147	0.720194	Dusp12
ENSMUSG00000027806	38.1797	-0.731788	0.456644	-1.60253	0.109038	0.720194	Tsc22d2
ENSMUSG00000029401	5.5711	1.7162	1.07255	1.60011	0.109574	0.720194	Rilpl2
ENSMUSG00000031065	35.3815	0.794185	0.496147	1.60071	0.109442	0.720194	Cdk16
ENSMUSG00000033004	317.788	-0.423627	0.264813	-1.59972	0.109661	0.720194	Mycbp2
ENSMUSG00000033295	54.9395	0.846369	0.528934	1.60014	0.109567	0.720194	Ptprf
ENSMUSG00000034248	7.39274	-1.24516	0.776512	-1.60353	0.108819	0.720194	Slc25a37
ENSMUSG00000036057	17.4071	-0.868754	0.542375	-1.60176	0.109209	0.720194	Ptpn23
ENSMUSG00000040128	38.8377	-0.728511	0.455491	-1.5994	0.109732	0.720194	Pnrc1
ENSMUSG00000060802	632.208	0.246516	0.153814	1.60269	0.109003	0.720194	B2m
ENSMUSG00000099757	7.64081	-1.77962	1.11081	-1.6021	0.109133	0.720194	BE692007
ENSMUSG00000046879	41.8873	-0.952603	0.595892	-1.59862	0.109906	0.720322	Irgm1
ENSMUSG00000096188	22.1971	-1.03969	0.650339	-1.59869	0.109889	0.720322	Cmtm4
ENSMUSG00000019505	69.2154	0.341854	0.213943	1.59787	0.110071	0.720902	Ubb
ENSMUSG00000029598	70.5064	-0.855847	0.536192	-1.59616	0.110453	0.722412	Plbd2
ENSMUSG00000107362	14.3747	-1.15145	0.721394	-1.59614	0.110456	0.722412	Gm40309
ENSMUSG00000010067	15.7785	-1.15416	0.72413	-1.59386	0.110968	0.724742	Rassf1
ENSMUSG00000053580	8.22543	-1.32736	0.832687	-1.59406	0.110922	0.724742	Tanc2
ENSMUSG00000001156	4.18048	-1.17975	0.741301	-1.59147	0.111505	0.724942	Mxd1
ENSMUSG00000012117	9.91963	-1.23903	0.778505	-1.59155	0.111486	0.724942	Dhdds
ENSMUSG00000013465	20.293	1.08935	0.684863	1.59061	0.111697	0.724942	Nelfb
ENSMUSG00000022204	7.97494	1.48838	0.934662	1.59243	0.111288	0.724942	Ngdn
ENSMUSG00000026192	8.27264	1.38948	0.87341	1.59086	0.11164	0.724942	Atic
ENSMUSG00000034593	26.4165	-0.931475	0.58525	-1.59158	0.111478	0.724942	Myo5a
ENSMUSG00000035845	4.87088	-1.73128	1.08748	-1.59202	0.111381	0.724942	Alg12
ENSMUSG00000071054	33.5298	-0.867723	0.545479	-1.59075	0.111665	0.724942	Safb
ENSMUSG00000078350	11.2833	1.08506	0.681642	1.59183	0.111424	0.724942	Smim1
ENSMUSG00000001995	2.35975	-1.55147	0.976289	-1.58915	0.112026	0.725087	Sipa1l2
ENSMUSG00000023272	21.428	-1.22554	0.771344	-1.58884	0.112096	0.725087	Creld2
ENSMUSG00000036061	12.3788	1.5614	0.982756	1.58879	0.112107	0.725087	Smug1
ENSMUSG00000049775	274.874	0.318681	0.200464	1.58972	0.111899	0.725087	Tmsb4x
ENSMUSG00000107283	11.9533	1.2607	0.793339	1.58911	0.112037	0.725087	Mpv17
ENSMUSG00000094724	5.21679	0.471883	0.297244	1.58753	0.112393	0.726434	Rnaset2b
ENSMUSG00000032096	48.0471	-0.60971	0.384204	-1.58694	0.112526	0.726791	Arcn1
ENSMUSG00000022698	13.0617	-1.02992	0.649163	-1.58654	0.112617	0.726879	Naa50
ENSMUSG00000042446	30.7942	-0.756743	0.477107	-1.58611	0.112715	0.727005	Zmym4
ENSMUSG00000004661	3.31837	-1.33696	0.846225	-1.57991	0.114126	0.727019	Arid3b
ENSMUSG00000005823	34.0319	0.867488	0.549924	1.57747	0.114687	0.727019	Gpr108
ENSMUSG00000006058	17.3303	-1.07667	0.681311	-1.58029	0.114041	0.727019	Snf8
ENSMUSG00000007480	6.51416	1.41443	0.895941	1.5787	0.114404	0.727019	Mc5r
ENSMUSG00000011877	13.9831	-1.08242	0.684624	-1.58104	0.113869	0.727019	Git1
ENSMUSG00000018672	38.5641	0.795016	0.504162	1.57691	0.114817	0.727019	Copz2
ENSMUSG00000019487	26.3606	-0.841309	0.533186	-1.57789	0.114591	0.727019	Trip10
ENSMUSG00000021957	27.3022	-1.00505	0.635946	-1.5804	0.114015	0.727019	Tkt
ENSMUSG00000023973	29.0931	-1.12929	0.712222	-1.58559	0.112832	0.727019	Cnpy3
ENSMUSG00000024135	4.09815	1.56979	0.9904	1.585	0.112965	0.727019	Srbd1
ENSMUSG00000026434	44.9138	-0.692269	0.43756	-1.58211	0.113624	0.727019	Nucks1
ENSMUSG00000029385	15.2076	1.14965	0.726291	1.5829	0.113444	0.727019	Ccng2
ENSMUSG00000030222	2.49992	-1.722	1.08992	-1.57993	0.114123	0.727019	Rerg
ENSMUSG00000031918	22.1948	-0.879861	0.55596	-1.5826	0.113514	0.727019	Mtmr2
ENSMUSG00000032560	49.3914	-0.768191	0.485144	-1.58343	0.113323	0.727019	Dnajc13
ENSMUSG00000033705	2.4001	1.53901	0.974814	1.57877	0.114389	0.727019	Stard9
ENSMUSG00000033855	18.2688	-0.909212	0.574999	-1.58124	0.113823	0.727019	Ston1
ENSMUSG00000034252	35.1353	-0.760355	0.479881	-1.58447	0.113088	0.727019	Senp6
ENSMUSG00000034566	11.4449	0.615268	0.389422	1.57995	0.114119	0.727019	Atp5h
ENSMUSG00000042557	28.3824	0.824778	0.522899	1.57732	0.114722	0.727019	Sin3a
ENSMUSG00000042626	41.056	-0.571496	0.362094	-1.57831	0.114495	0.727019	Shc1
ENSMUSG00000043587	21.842	1.04232	0.659981	1.57931	0.114265	0.727019	Pxylp1
ENSMUSG00000053477	88.5484	-0.517482	0.32703	-1.58237	0.113565	0.727019	Tcf4
ENSMUSG00000055240	6.92534	-1.57949	1.00152	-1.5771	0.114773	0.727019	Zfp101
ENSMUSG00000067608	4.15259	1.13654	0.718582	1.58164	0.113732	0.727019	Pcna-ps2
ENSMUSG00000083367	3.0014	0.848983	0.536046	1.58379	0.113242	0.727019	Gm8806
ENSMUSG00000093402	2.75108	-0.993992	0.627649	-1.58368	0.113268	0.727019	Gm18588
ENSMUSG00000039069	6.83393	1.65773	1.05262	1.57487	0.115286	0.728509	Mtg2
ENSMUSG00000040339	21.529	0.868787	0.551495	1.57533	0.11518	0.728509	Fam102b
ENSMUSG00000095742	8.28215	0.42436	0.269426	1.57506	0.115244	0.728509	CAAA01147332.1
ENSMUSG00000024293	12.6832	-1.1953	0.76028	-1.57218	0.115908	0.72899	Esco1
ENSMUSG00000025915	11.5724	-1.28279	0.815726	-1.57258	0.115816	0.72899	Sgk3
ENSMUSG00000026153	23.8274	-0.888438	0.564895	-1.57275	0.115777	0.72899	Fam135a
ENSMUSG00000031367	14.1361	-0.451611	0.28694	-1.57389	0.115514	0.72899	Ap1s2
ENSMUSG00000036352	14.8872	-1.41768	0.901118	-1.57324	0.115662	0.72899	Ubac1
ENSMUSG00000051242	38.5155	-1.42071	0.903179	-1.57301	0.115717	0.72899	Pcdhb9
ENSMUSG00000103851	3.55513	-1.47135	0.935849	-1.57221	0.115902	0.72899	Gm37606
ENSMUSG00000001774	16.5933	-1.12258	0.714858	-1.57035	0.116333	0.72921	Chordc1
ENSMUSG00000020311	25.5083	0.767251	0.488347	1.57112	0.116155	0.72921	Erlec1
ENSMUSG00000028080	65.7816	-0.698321	0.444612	-1.57063	0.116269	0.72921	Lrba
ENSMUSG00000053080	17.6154	-0.798029	0.508059	-1.57074	0.116242	0.72921	2700081O15Rik
ENSMUSG00000054091	11.1281	0.793427	0.505093	1.57085	0.116217	0.72921	1810037I17Rik
ENSMUSG00000024926	5.46911	-1.51798	0.967002	-1.56978	0.116466	0.72953	Kat5
ENSMUSG00000027603	7.51563	-1.29303	0.824048	-1.56913	0.116619	0.72953	Ggt7
ENSMUSG00000068758	8.26254	1.22983	0.783631	1.5694	0.116556	0.72953	Il3ra
ENSMUSG00000016933	61.6435	-0.676934	0.431503	-1.56878	0.116699	0.729542	Plcg1
ENSMUSG00000031505	41.865	0.881842	0.562627	1.56736	0.117029	0.730145	Naxd
ENSMUSG00000036323	38.2952	-0.834382	0.532196	-1.56781	0.116925	0.730145	Srp72
ENSMUSG00000089735	4.72736	1.29441	0.825843	1.56738	0.117026	0.730145	Gm8428
ENSMUSG00000006456	13.0027	-1.06885	0.682284	-1.56658	0.117213	0.730317	Rbm14
ENSMUSG00000042404	10.4549	-1.16879	0.745998	-1.56674	0.117175	0.730317	Dennd4b
ENSMUSG00000022500	32.8729	0.854234	0.545471	1.56605	0.117337	0.730602	Litaf
ENSMUSG00000022956	22.3327	0.641671	0.409937	1.56529	0.117514	0.730731	Atp5o
ENSMUSG00000034910	12.9827	1.17931	0.753372	1.56537	0.117496	0.730731	Pygo1
ENSMUSG00000032580	159.912	-0.48377	0.309284	-1.56416	0.11778	0.731874	Rbm5
ENSMUSG00000081643	2.88427	0.806966	0.516015	1.56384	0.117855	0.731874	Gm11605
ENSMUSG00000042202	15.3789	-1.15849	0.741149	-1.5631	0.118029	0.732467	Slc35e2
ENSMUSG00000024381	23.8374	-0.920485	0.589036	-1.5627	0.118124	0.732574	Bin1
ENSMUSG00000007610	7.72999	-1.55235	0.995338	-1.55962	0.11885	0.735794	Gtpbp3
ENSMUSG00000015961	13.0831	1.13716	0.729358	1.55913	0.118967	0.735794	Adss
ENSMUSG00000018196	9.74101	-1.32434	0.849519	-1.55892	0.119014	0.735794	Glrx2
ENSMUSG00000036104	28.7926	-0.918333	0.589481	-1.55787	0.119265	0.735794	Rab3gap1
ENSMUSG00000037373	47.3602	0.748298	0.480088	1.55867	0.119074	0.735794	Ctbp1
ENSMUSG00000038894	21.0356	-1.13417	0.727409	-1.55919	0.118952	0.735794	Irs2
ENSMUSG00000058254	5.32869	1.66993	1.07241	1.55717	0.119431	0.735794	Tspan7
ENSMUSG00000060935	20.9525	0.945194	0.606761	1.55777	0.119288	0.735794	Tmem263
ENSMUSG00000070426	14.2999	-1.16522	0.748212	-1.55734	0.119389	0.735794	Rnf121
ENSMUSG00000106864	17.1438	-0.790675	0.507763	-1.55718	0.119429	0.735794	Gtf3c2
ENSMUSG00000084289	20.1849	0.277998	0.178581	1.55671	0.11954	0.735981	Gm6977
ENSMUSG00000054455	17.2303	1.0199	0.655538	1.55582	0.11975	0.736307	Vapb
ENSMUSG00000105179	4.25481	-1.60186	1.02938	-1.55613	0.119676	0.736307	Gm42866
ENSMUSG00000003068	16.058	1.00618	0.652541	1.54194	0.123088	0.737445	Stk11
ENSMUSG00000004455	9.34561	-0.844277	0.544525	-1.55048	0.121025	0.737445	Ppp1cc
ENSMUSG00000005682	13.0103	-1.24292	0.805853	-1.54237	0.122985	0.737445	Pan2
ENSMUSG00000005732	12.8839	-1.09064	0.701789	-1.55408	0.120165	0.737445	Ranbp1
ENSMUSG00000006763	3.63718	-1.78184	1.15826	-1.53838	0.123956	0.737445	Saal1
ENSMUSG00000008859	13.8118	0.919104	0.597135	1.53919	0.123758	0.737445	Rala
ENSMUSG00000017132	17.6655	-1.07704	0.699948	-1.53874	0.123867	0.737445	Cyth1
ENSMUSG00000018899	110.953	-0.628276	0.40548	-1.54946	0.12127	0.737445	Irf1
ENSMUSG00000019842	10.2886	1.16201	0.751153	1.54697	0.121871	0.737445	Traf3ip2
ENSMUSG00000020064	35.1018	-0.760317	0.489641	-1.55281	0.120469	0.737445	Herc4
ENSMUSG00000021981	6.62086	1.2652	0.814925	1.55253	0.120535	0.737445	Cab39l
ENSMUSG00000022822	142.205	0.499292	0.323169	1.54499	0.12235	0.737445	Abcc5
ENSMUSG00000023066	8.2489	-1.31479	0.850303	-1.54627	0.12204	0.737445	Rttn
ENSMUSG00000024665	7.71102	-1.16549	0.753588	-1.54658	0.121964	0.737445	Fads2
ENSMUSG00000025223	33.6642	-0.598324	0.388114	-1.54162	0.123166	0.737445	Ldb1
ENSMUSG00000025888	26.6724	-1.14324	0.738018	-1.54906	0.121367	0.737445	Casp1
ENSMUSG00000026280	30.3091	-0.890508	0.578945	-1.53816	0.12401	0.737445	Atg4b
ENSMUSG00000026427	11.9986	1.13685	0.736231	1.54415	0.122551	0.737445	Eif2d
ENSMUSG00000027854	21.7387	1.15818	0.751103	1.54197	0.123082	0.737445	Sike1
ENSMUSG00000028522	55.2374	-0.707161	0.459861	-1.53777	0.124104	0.737445	Mier1
ENSMUSG00000028989	2.18177	-1.1764	0.765028	-1.53772	0.124117	0.737445	Angptl7
ENSMUSG00000029775	15.593	-1.11224	0.721662	-1.54122	0.123262	0.737445	Klhdc10
ENSMUSG00000030279	11.0105	-1.15475	0.746214	-1.54748	0.121748	0.737445	C2cd5
ENSMUSG00000030852	8.03451	-1.30653	0.84273	-1.55035	0.121057	0.737445	Tacc2
ENSMUSG00000031109	3.45741	1.56534	1.01529	1.54177	0.123128	0.737445	Enox2
ENSMUSG00000031652	16.3388	1.17767	0.761702	1.5461	0.12208	0.737445	N4bp1
ENSMUSG00000032412	31.3404	0.884791	0.572876	1.54447	0.122474	0.737445	Atp1b3
ENSMUSG00000033417	12.7723	-1.089	0.703208	-1.54862	0.121473	0.737445	Cacul1
ENSMUSG00000034664	1.6102	-0.72107	0.467103	-1.54371	0.122659	0.737445	Itga2b
ENSMUSG00000034957	52.9155	0.538107	0.347213	1.54979	0.121192	0.737445	Cebpa
ENSMUSG00000038174	11.095	-1.31447	0.850206	-1.54605	0.122091	0.737445	Fam126b
ENSMUSG00000038181	27.0329	-0.793256	0.510364	-1.55429	0.120114	0.737445	Chpf2
ENSMUSG00000038393	191.438	-0.558426	0.36279	-1.53926	0.123742	0.737445	Txnip
ENSMUSG00000038619	31.2343	0.913603	0.589996	1.54849	0.121504	0.737445	Ensa
ENSMUSG00000039835	7.73402	1.32662	0.855944	1.54989	0.121169	0.737445	Nhsl1
ENSMUSG00000040260	44.176	-0.593542	0.384906	-1.54204	0.123063	0.737445	Daam2
ENSMUSG00000040569	194.674	0.496649	0.320131	1.55139	0.120807	0.737445	Slc26a7
ENSMUSG00000042770	5.06216	-1.26359	0.820686	-1.53968	0.123639	0.737445	Hebp1
ENSMUSG00000042772	37.034	-0.821066	0.532986	-1.5405	0.123438	0.737445	Smg7
ENSMUSG00000048154	215.434	-0.471545	0.304179	-1.55022	0.121088	0.737445	Kmt2d
ENSMUSG00000054072	59.7161	-1.0051	0.647517	-1.55223	0.120607	0.737445	Iigp1
ENSMUSG00000059475	11.8835	-1.20093	0.77481	-1.54997	0.121148	0.737445	Zfp426
ENSMUSG00000062908	38.3949	0.660066	0.428097	1.54186	0.123108	0.737445	Acadm
ENSMUSG00000064354	1.41699	-0.74665	0.485326	-1.53845	0.123939	0.737445	mt-Co2
ENSMUSG00000064357	2.24874	-0.585309	0.378504	-1.54638	0.122014	0.737445	mt-Atp6
ENSMUSG00000070730	3.56418	1.65868	1.06847	1.55238	0.12057	0.737445	Rmdn3
ENSMUSG00000071454	22.22	-0.859512	0.558208	-1.53977	0.123616	0.737445	Dtnb
ENSMUSG00000071645	12.058	-1.38936	0.903396	-1.53793	0.124066	0.737445	Tut1
ENSMUSG00000075010	25.7054	1.04719	0.679377	1.5414	0.123221	0.737445	AW112010
ENSMUSG00000081277	5.15641	0.907984	0.585411	1.55102	0.120897	0.737445	Gm15285
ENSMUSG00000086370	16.2289	-1.08071	0.699164	-1.54571	0.122174	0.737445	Ftx
ENSMUSG00000097491	15.313	-1.54783	1.00271	-1.54364	0.122676	0.737445	Gm2366
ENSMUSG00000106427	6.44623	-1.63095	1.0545	-1.54665	0.121947	0.737445	Gm42820
ENSMUSG00000064043	3.37036	1.524	0.991392	1.53723	0.124237	0.737687	Trerf1
ENSMUSG00000020386	23.0772	1.08889	0.708514	1.53687	0.124326	0.737746	Sar1b
ENSMUSG00000052512	14.5254	-1.18513	0.771521	-1.5361	0.124514	0.737922	Nav2
ENSMUSG00000082809	2.35174	0.47961	0.312207	1.53619	0.124491	0.737922	Gm14150
ENSMUSG00000060681	19.317	-0.91718	0.597722	-1.53446	0.124916	0.739841	Slc9a6
ENSMUSG00000009828	20.7	0.876426	0.571369	1.5339	0.125053	0.739982	Ick
ENSMUSG00000020719	291.418	-0.304682	0.198697	-1.5334	0.125178	0.739982	Ddx5
ENSMUSG00000026222	38.6775	-0.765248	0.498998	-1.53357	0.125136	0.739982	Sp100
ENSMUSG00000037206	394.219	0.448197	0.292437	1.53263	0.125368	0.740167	Islr
ENSMUSG00000049872	12.854	-1.37913	0.899729	-1.53283	0.125318	0.740167	Fam26e
ENSMUSG00000043051	3.56592	-1.47412	0.962225	-1.53199	0.125525	0.740627	Disc1
ENSMUSG00000087594	47.8399	-0.60716	0.396505	-1.53128	0.1257	0.741194	BC039771
ENSMUSG00000018858	12.8718	1.17471	0.769702	1.52619	0.126962	0.741495	Mrpl58
ENSMUSG00000020290	30.0183	-0.858762	0.562769	-1.52596	0.12702	0.741495	Xpo1
ENSMUSG00000020956	9.32133	1.38441	0.904462	1.53064	0.125858	0.741495	Dtd2
ENSMUSG00000021111	55.644	-0.671645	0.43992	-1.52674	0.126825	0.741495	Papola
ENSMUSG00000023832	6.05412	-1.17359	0.768296	-1.52752	0.126632	0.741495	Acat2
ENSMUSG00000025156	7.72038	-1.03224	0.675627	-1.52782	0.126557	0.741495	Gps1
ENSMUSG00000025358	3.60054	-1.51985	0.993505	-1.52978	0.126071	0.741495	Cdk2
ENSMUSG00000031379	12.5474	1.31752	0.86261	1.52736	0.126671	0.741495	Pir
ENSMUSG00000031537	33.4398	-0.946215	0.618962	-1.52871	0.126336	0.741495	Ikbkb
ENSMUSG00000035933	16.7395	-0.942163	0.617146	-1.52665	0.126849	0.741495	Cog5
ENSMUSG00000036737	4.51021	-1.3748	0.89973	-1.52802	0.126509	0.741495	Oxsr1
ENSMUSG00000037709	27.4556	0.932363	0.610831	1.52638	0.126914	0.741495	Fam13a
ENSMUSG00000039826	9.8158	-1.49721	0.98052	-1.52696	0.126771	0.741495	Trub2
ENSMUSG00000040428	2	-1.69707	1.11203	-1.52611	0.126983	0.741495	Plekha4
ENSMUSG00000087892	2.83453	-1.44013	0.942296	-1.52832	0.126433	0.741495	Gm25278
ENSMUSG00000097081	1.34529	-1.47924	0.969248	-1.52618	0.126966	0.741495	Gm10425
ENSMUSG00000051149	2.27672	-0.991533	0.65013	-1.52513	0.127227	0.742025	Adnp
ENSMUSG00000097242	2.81632	-1.71413	1.12405	-1.52496	0.12727	0.742025	Gm16907
ENSMUSG00000003518	3.57965	-1.43058	0.93897	-1.52356	0.127619	0.743131	Dusp3
ENSMUSG00000024772	43.4095	-0.90411	0.593384	-1.52365	0.127596	0.743131	Ehd1
ENSMUSG00000022538	5.26662	1.32415	0.86954	1.52282	0.127803	0.743742	Lsg1
ENSMUSG00000026786	4.05947	-1.64006	1.07737	-1.52228	0.12794	0.744071	Apbb1ip
ENSMUSG00000032198	17.1226	-0.736255	0.483965	-1.5213	0.128185	0.744112	Dock6
ENSMUSG00000089849	16.2548	0.781267	0.513396	1.52176	0.128068	0.744112	Runx2os2
ENSMUSG00000107383	6.53776	0.839343	0.551651	1.52151	0.128132	0.744112	Gm4366
ENSMUSG00000029122	28.9204	-0.910529	0.598751	-1.52071	0.128332	0.744223	Evc
ENSMUSG00000036678	11.8779	-1.51737	0.997887	-1.52059	0.128364	0.744223	Aaas
ENSMUSG00000106772	3.15741	1.52521	1.00384	1.51937	0.12867	0.745536	Gm43794
ENSMUSG00000027132	5.01704	-1.28376	0.845403	-1.51852	0.128884	0.74598	Katnbl1
ENSMUSG00000045576	47.5991	-0.84064	0.55374	-1.51811	0.128986	0.74598	St7l
ENSMUSG00000046562	20.0751	1.00926	0.66477	1.5182	0.128963	0.74598	Unc119b
ENSMUSG00000025786	18.4524	-0.940765	0.620284	-1.51667	0.129351	0.7464	Zdhhc3
ENSMUSG00000026455	21.2307	-1.20918	0.797092	-1.517	0.129268	0.7464	Klhl12
ENSMUSG00000028161	24.08	0.732966	0.483308	1.51656	0.129378	0.7464	Ppp3ca
ENSMUSG00000039701	13.1562	-1.28158	0.844627	-1.51733	0.129183	0.7464	Usp53
ENSMUSG00000010358	25.3185	-0.884704	0.583833	-1.51534	0.129687	0.746409	Ifi35
ENSMUSG00000021420	10.0603	1.27784	0.843103	1.51564	0.129609	0.746409	Fars2
ENSMUSG00000024908	54.5167	-0.604114	0.398679	-1.51529	0.129699	0.746409	Ppp6r3
ENSMUSG00000025474	15.528	-0.985165	0.649961	-1.51573	0.129588	0.746409	Tubgcp2
ENSMUSG00000021725	7.09939	-1.3055	0.862108	-1.51431	0.129946	0.74737	Parp8
ENSMUSG00000031467	33.6229	0.833425	0.550513	1.51391	0.130049	0.747503	Agpat5
ENSMUSG00000029761	140.271	-0.393178	0.259849	-1.5131	0.130254	0.747762	Cald1
ENSMUSG00000085042	3.10555	-1.55899	1.03026	-1.5132	0.130229	0.747762	Abhd11os
ENSMUSG00000002064	26.1114	-0.995805	0.661268	-1.5059	0.132092	0.747871	Sdf2
ENSMUSG00000008140	23.1458	0.750291	0.500244	1.49985	0.133654	0.747871	Emc10
ENSMUSG00000017493	2783.55	0.269284	0.179669	1.49878	0.133929	0.747871	Igfbp4
ENSMUSG00000017679	22.1303	-1.09847	0.728987	-1.50685	0.13185	0.747871	Ttpal
ENSMUSG00000017686	26.1796	-0.795925	0.52785	-1.50786	0.13159	0.747871	Rhot1
ENSMUSG00000018446	8.88746	1.28363	0.85077	1.50878	0.131354	0.747871	C1qbp
ENSMUSG00000020092	8.00043	-1.08273	0.720055	-1.50368	0.132665	0.747871	Pald1
ENSMUSG00000020564	14.5296	0.9631	0.637176	1.51151	0.130658	0.747871	Atxn7l1
ENSMUSG00000020888	10.6118	-1.1034	0.73288	-1.50557	0.132177	0.747871	Dvl2
ENSMUSG00000021709	59.0016	0.434012	0.288029	1.50684	0.131853	0.747871	Erbin
ENSMUSG00000022139	65.827	-0.535138	0.354803	-1.50827	0.131486	0.747871	Mbnl2
ENSMUSG00000022181	35.1001	1.08732	0.719225	1.51179	0.130586	0.747871	C6
ENSMUSG00000022350	20.7083	-0.997383	0.664233	-1.50156	0.133212	0.747871	Washc5
ENSMUSG00000022462	112.811	-0.614375	0.407655	-1.5071	0.131786	0.747871	Slc38a2
ENSMUSG00000024063	11.3525	0.895121	0.593439	1.50836	0.131462	0.747871	Lbh
ENSMUSG00000024236	31.7833	-0.790062	0.526061	-1.50184	0.133137	0.747871	Svil
ENSMUSG00000024245	18.312	1.07857	0.713138	1.51243	0.130423	0.747871	Tmem178
ENSMUSG00000025854	4.23034	1.50112	0.999919	1.50125	0.133292	0.747871	Fam20c
ENSMUSG00000026000	28.478	-0.986509	0.658006	-1.49924	0.133811	0.747871	Lancl1
ENSMUSG00000026021	7.55089	0.758012	0.505355	1.49996	0.133625	0.747871	Sumo1
ENSMUSG00000026239	14.4363	0.993727	0.660653	1.50416	0.13254	0.747871	Pde6d
ENSMUSG00000027852	21.6443	-0.978765	0.653035	-1.49879	0.133927	0.747871	Nras
ENSMUSG00000028799	12.7199	0.935494	0.623051	1.50147	0.133233	0.747871	Zfp362
ENSMUSG00000028967	465.267	-0.451712	0.300141	-1.505	0.132324	0.747871	Errfi1
ENSMUSG00000029175	14.6542	-1.28862	0.857953	-1.50197	0.133104	0.747871	Slc35f6
ENSMUSG00000029405	27.7361	-0.863648	0.571426	-1.51139	0.130688	0.747871	G3bp2
ENSMUSG00000030554	23.5425	-1.04104	0.694192	-1.49965	0.133705	0.747871	Synm
ENSMUSG00000033808	28.5721	-0.744506	0.495773	-1.50171	0.133172	0.747871	Tmem87a
ENSMUSG00000034160	366.032	-0.325603	0.21541	-1.51155	0.130649	0.747871	Ogt
ENSMUSG00000035293	6.89894	1.285	0.85135	1.50936	0.131206	0.747871	G2e3
ENSMUSG00000037405	35.7327	-0.863106	0.57475	-1.50171	0.133173	0.747871	Icam1
ENSMUSG00000037997	19.4958	-0.990921	0.658924	-1.50385	0.132621	0.747871	Parp11
ENSMUSG00000038369	35.1749	-0.672641	0.44616	-1.50762	0.131651	0.747871	Ncoa6
ENSMUSG00000038855	15.2587	-0.901604	0.59938	-1.50423	0.132523	0.747871	Itpkb
ENSMUSG00000040028	44.9425	-0.66652	0.441174	-1.51079	0.130843	0.747871	Elavl1
ENSMUSG00000040183	10.5488	1.29471	0.863095	1.50008	0.133593	0.747871	Ankrd6
ENSMUSG00000042594	27.6805	-0.405519	0.270583	-1.49869	0.133954	0.747871	Sh2b3
ENSMUSG00000049470	106.034	-0.428488	0.283932	-1.50912	0.131269	0.747871	Aff4
ENSMUSG00000050856	2.87185	0.806694	0.537175	1.50173	0.133166	0.747871	Atp5k
ENSMUSG00000070733	31.1303	-0.738925	0.491354	-1.50385	0.132619	0.747871	Fryl
ENSMUSG00000071533	8.46711	-0.813635	0.542822	-1.4989	0.1339	0.747871	Pcnp
ENSMUSG00000071796	1.65323	-0.835753	0.557328	-1.49957	0.133726	0.747871	6820431F20Rik
ENSMUSG00000074358	1.6124	-1.63391	1.08867	-1.50083	0.133399	0.747871	Ccdc61
ENSMUSG00000074748	49.641	0.5829	0.387817	1.50303	0.132832	0.747871	Atxn7l3b
ENSMUSG00000107000	13.5439	1.02609	0.680712	1.50737	0.131715	0.747871	Gm43481
ENSMUSG00000107155	8.38944	-1.31718	0.876187	-1.5033	0.132761	0.747871	Gm43793
ENSMUSG00000024817	51.1645	-0.688432	0.45975	-1.49741	0.134288	0.748683	Uhrf2
ENSMUSG00000028082	42.6661	-0.673959	0.450067	-1.49746	0.134273	0.748683	Sh3d19
ENSMUSG00000035133	48.9091	-0.742935	0.496215	-1.4972	0.13434	0.748683	Arhgap5
ENSMUSG00000040725	25.6524	-0.670988	0.44828	-1.4968	0.134444	0.748816	Hnrnpul1
ENSMUSG00000023044	23.3084	0.886834	0.592755	1.49612	0.134622	0.749359	Csad
ENSMUSG00000003545	144.353	-0.910449	0.60927	-1.49433	0.13509	0.74952	Fosb
ENSMUSG00000015942	1.87289	-1.33809	0.89505	-1.49499	0.134917	0.74952	Gtf2ird2
ENSMUSG00000020122	133.649	-0.442992	0.29642	-1.49447	0.135052	0.74952	Egfr
ENSMUSG00000028673	62.2174	0.696931	0.466355	1.49442	0.135065	0.74952	Fuca1
ENSMUSG00000041153	5.09054	1.35738	0.908447	1.49418	0.13513	0.74952	Osgin2
ENSMUSG00000048612	26.9159	-0.730711	0.489042	-1.49417	0.135132	0.74952	Myof
ENSMUSG00000038412	2.78792	1.28393	0.860055	1.49285	0.135477	0.750705	Higd1a
ENSMUSG00000103509	5.32717	-1.56021	1.0452	-1.49274	0.135506	0.750705	Gm38372
ENSMUSG00000037119	32.9557	-0.778937	0.521929	-1.49242	0.135589	0.750722	Fam91a1
ENSMUSG00000024529	117.256	0.528339	0.354259	1.49139	0.135858	0.750877	Lox
ENSMUSG00000033987	2.94128	-1.36215	0.91307	-1.49184	0.135741	0.750877	Dnah17
ENSMUSG00000035299	11.3911	-0.742812	0.498046	-1.49145	0.135842	0.750877	Mid1
ENSMUSG00000017615	23.2304	1.0431	0.699914	1.49033	0.136138	0.751534	Tnfaip1
ENSMUSG00000039834	12.6106	1.0081	0.676337	1.49053	0.136086	0.751534	Zfp335
ENSMUSG00000020246	21.499	-0.873191	0.586137	-1.48974	0.136293	0.751943	Hcfc2
ENSMUSG00000003228	3.42532	-1.19597	0.803943	-1.48763	0.13685	0.752098	Grk5
ENSMUSG00000019767	13.1828	-1.07176	0.720545	-1.48743	0.136903	0.752098	Ccdc170
ENSMUSG00000021408	16.0781	-0.871505	0.585693	-1.48799	0.136754	0.752098	Ripk1
ENSMUSG00000025265	3.16347	1.29053	0.867763	1.48719	0.136964	0.752098	Fgd1
ENSMUSG00000029772	39.8231	-0.93717	0.630123	-1.48728	0.13694	0.752098	Ahcyl2
ENSMUSG00000058812	1.37	-1.49648	1.00492	-1.48915	0.136447	0.752098	0610039K10Rik
ENSMUSG00000059323	36.6274	0.770774	0.518163	1.48751	0.136879	0.752098	Tonsl
ENSMUSG00000086964	5.10191	-1.29212	0.868182	-1.48831	0.136669	0.752098	Gm15948
ENSMUSG00000030555	13.0928	0.923766	0.621523	1.48629	0.137202	0.752958	Ttc23
ENSMUSG00000003199	15.2468	-1.23903	0.83503	-1.48381	0.137859	0.755028	Mpnd
ENSMUSG00000022378	1.69045	-1.37001	0.923215	-1.48396	0.137821	0.755028	Fam49b
ENSMUSG00000023067	5.50304	-1.08316	0.730126	-1.48352	0.137936	0.755028	Cdkn1a
ENSMUSG00000027134	3.78826	0.981483	0.661164	1.48448	0.137682	0.755028	Lpcat4
ENSMUSG00000072501	40.0109	-0.588754	0.39691	-1.48334	0.137983	0.755028	Phf20l1
ENSMUSG00000001419	17.767	-0.739404	0.499213	-1.48114	0.138569	0.755141	Mef2d
ENSMUSG00000002428	11.9256	1.14462	0.77229	1.48211	0.138312	0.755141	Hltf
ENSMUSG00000006215	4.17213	-1.335	0.901145	-1.48144	0.138488	0.755141	Zbtb17
ENSMUSG00000028691	35.6707	0.495605	0.334528	1.48151	0.138472	0.755141	Prdx1
ENSMUSG00000029238	49.3908	-0.693061	0.467629	-1.48207	0.138321	0.755141	Clock
ENSMUSG00000032353	69.3421	0.634076	0.427952	1.48165	0.138433	0.755141	Tmed3
ENSMUSG00000034795	2.74584	1.30696	0.882198	1.48149	0.138477	0.755141	Ccdc122
ENSMUSG00000002846	2.50527	1.4708	0.99345	1.4805	0.13874	0.75519	Timmdc1
ENSMUSG00000024235	7.99358	1.31091	0.885372	1.48063	0.138704	0.75519	Map3k8
ENSMUSG00000106636	13.4179	-1.13554	0.767182	-1.48015	0.138834	0.755262	Gm43813
ENSMUSG00000016831	16.3799	-0.979795	0.662354	-1.47926	0.13907	0.75611	Tox4
ENSMUSG00000032599	27.3429	-0.837539	0.566682	-1.47797	0.139416	0.756361	Ip6k2
ENSMUSG00000036188	8.55928	1.16541	0.78849	1.47802	0.139402	0.756361	Ankmy2
ENSMUSG00000036555	15.8466	-1.0282	0.695728	-1.47788	0.13944	0.756361	Iqce
ENSMUSG00000104867	2.17903	-1.63656	1.10686	-1.47856	0.139259	0.756361	Gm43728
ENSMUSG00000025764	11.308	1.33175	0.902788	1.47516	0.140171	0.758503	Jade1
ENSMUSG00000025766	15.4875	-1.48029	1.00362	-1.47495	0.140225	0.758503	D3Ertd751e
ENSMUSG00000028047	1.54108	-1.22184	0.828271	-1.47516	0.140168	0.758503	Thbs3
ENSMUSG00000042605	88.4198	-0.547323	0.37081	-1.47602	0.139938	0.758503	Atxn2
ENSMUSG00000070002	10.8278	0.975038	0.661091	1.47489	0.140241	0.758503	Ell
ENSMUSG00000036053	34.0975	0.760895	0.516009	1.47458	0.140327	0.758527	Fmnl2
ENSMUSG00000022801	26.3749	-0.677774	0.459906	-1.47372	0.140557	0.759331	Lrch3
ENSMUSG00000017478	10.0803	-1.14026	0.774985	-1.47133	0.141201	0.760174	Zc3h18
ENSMUSG00000028603	41.6593	-0.483516	0.328484	-1.47196	0.141031	0.760174	Scp2
ENSMUSG00000033382	26.2445	-0.783224	0.532157	-1.47179	0.141077	0.760174	Trappc8
ENSMUSG00000050989	37.956	-0.682647	0.463901	-1.47154	0.141146	0.760174	Selenon
ENSMUSG00000075254	96.2114	0.594378	0.403713	1.47228	0.140946	0.760174	Heg1
ENSMUSG00000101111	3.58102	-0.422443	0.286957	-1.47215	0.140981	0.760174	Gm28437
ENSMUSG00000028991	31.9884	-0.770632	0.524204	-1.4701	0.141535	0.76128	Mtor
ENSMUSG00000030127	35.1548	-0.89576	0.609553	-1.46954	0.141687	0.76128	Cops7a
ENSMUSG00000047414	33.8242	-0.98617	0.670914	-1.46989	0.141591	0.76128	Flrt2
ENSMUSG00000056305	5.19445	-1.35916	0.924997	-1.46937	0.141732	0.76128	Usp39
ENSMUSG00000027823	26.4825	-0.995619	0.678004	-1.46846	0.14198	0.761301	Gmps
ENSMUSG00000055148	65.9074	-0.814754	0.554705	-1.46881	0.141885	0.761301	Klf2
ENSMUSG00000070372	4.30379	-0.775211	0.527863	-1.46858	0.141946	0.761301	Capza1
ENSMUSG00000022528	62.0463	0.629664	0.429082	1.46747	0.142249	0.762303	Hes1
ENSMUSG00000097859	7.2511	-1.16125	0.79163	-1.46691	0.142401	0.762683	Gm26601
ENSMUSG00000026761	26.0506	-0.699791	0.477456	-1.46567	0.142739	0.764055	Orc4
ENSMUSG00000029632	24.2702	0.511531	0.349084	1.46535	0.142825	0.764077	Ndufa4
ENSMUSG00000040616	43.519	1.02947	0.702754	1.4649	0.142947	0.764294	Tmem51
ENSMUSG00000001761	58.416	-0.641301	0.438633	-1.46205	0.143728	0.764915	Smo
ENSMUSG00000019880	26.473	0.852292	0.583462	1.46075	0.144084	0.764915	Rspo3
ENSMUSG00000025290	7.82851	0.437213	0.299401	1.46029	0.144209	0.764915	Rps24
ENSMUSG00000026113	13.9803	-0.909921	0.621727	-1.46354	0.14332	0.764915	Inpp4a
ENSMUSG00000036667	29.8044	0.976663	0.668606	1.46075	0.144085	0.764915	Tcaf1
ENSMUSG00000041642	6.31042	-1.2945	0.885268	-1.46227	0.143666	0.764915	Kif21b
ENSMUSG00000051586	39.2239	-0.642121	0.439085	-1.46241	0.143629	0.764915	Mical3
ENSMUSG00000053113	219.522	-0.678288	0.464336	-1.46077	0.144079	0.764915	Socs3
ENSMUSG00000057522	34.1688	0.687561	0.470823	1.46034	0.144197	0.764915	Spop
ENSMUSG00000059851	14.4918	-1.06324	0.727331	-1.46183	0.143787	0.764915	Kmt5c
ENSMUSG00000059923	8.74988	-0.909741	0.621918	-1.4628	0.143522	0.764915	Grb2
ENSMUSG00000060227	20.9939	-0.826069	0.564691	-1.46287	0.143504	0.764915	Casc4
ENSMUSG00000060393	2.83287	0.756318	0.5167	1.46375	0.143263	0.764915	Gm5580
ENSMUSG00000081157	1.65364	1.42321	0.974008	1.46118	0.143965	0.764915	Gm13552
ENSMUSG00000000916	5.97986	1.31661	0.901987	1.45968	0.144377	0.765019	Nsun5
ENSMUSG00000005483	34.0853	-0.904254	0.619689	-1.45921	0.144508	0.765019	Dnajb1
ENSMUSG00000021767	50.3506	-0.582661	0.399337	-1.45907	0.144545	0.765019	Kat6b
ENSMUSG00000038970	4.22138	1.12565	0.771509	1.45902	0.14456	0.765019	Lmtk2
ENSMUSG00000049791	24.8988	-0.967089	0.662965	-1.45873	0.144638	0.765019	Fzd4
ENSMUSG00000047777	7.59196	1.12021	0.768168	1.45829	0.14476	0.765228	Phf13
ENSMUSG00000032741	22.6511	-0.824083	0.565364	-1.45761	0.144947	0.765352	Tpcn1
ENSMUSG00000062031	25.7333	-0.803705	0.551373	-1.45764	0.144939	0.765352	Pgghg
ENSMUSG00000062115	32.5558	-0.945895	0.649077	-1.45729	0.145036	0.76539	Rai1
ENSMUSG00000021222	5.8753	-1.52688	1.04836	-1.45644	0.14527	0.765762	Dcaf4
ENSMUSG00000038236	8.96512	-1.13921	0.782096	-1.45661	0.145224	0.765762	Hoxa7
ENSMUSG00000026439	13.7872	-0.974618	0.669816	-1.45505	0.145655	0.766059	Rbbp5
ENSMUSG00000043943	26.5195	-1.19507	0.821222	-1.45523	0.145605	0.766059	Naalad2
ENSMUSG00000050002	11.6417	0.909914	0.624986	1.45589	0.145422	0.766059	Idnk
ENSMUSG00000063087	3.42527	-1.41327	0.970953	-1.45554	0.145519	0.766059	Gm10125
ENSMUSG00000039477	53.7923	-0.538686	0.370587	-1.4536	0.146057	0.767627	Tnrc18
ENSMUSG00000074182	10.0318	-1.23056	0.846684	-1.45338	0.146117	0.767627	Znhit6
ENSMUSG00000038535	35.7542	-0.637281	0.438598	-1.453	0.146225	0.767762	Zfp280d
ENSMUSG00000043311	2.54268	1.39351	0.959268	1.45268	0.146313	0.767792	D17H6S53E
ENSMUSG00000018412	59.2861	-0.553639	0.381341	-1.45182	0.146551	0.768267	Kansl1
ENSMUSG00000020664	21.6015	0.891706	0.614374	1.45141	0.146667	0.768267	Dld
ENSMUSG00000024528	4.58489	-1.41428	0.974574	-1.45117	0.146732	0.768267	Srfbp1
ENSMUSG00000040857	9.51698	-0.971004	0.669045	-1.45133	0.146689	0.768267	Erf
ENSMUSG00000016344	5.15828	0.798568	0.550925	1.4495	0.147197	0.768542	Ppdpf
ENSMUSG00000022469	52.5863	-0.806633	0.55619	-1.45028	0.146979	0.768542	Rapgef3
ENSMUSG00000026159	34.8172	0.717678	0.495174	1.44934	0.147241	0.768542	Agfg1
ENSMUSG00000071350	4.39123	1.58691	1.09487	1.44942	0.147222	0.768542	Setdb2
ENSMUSG00000100862	2.13103	-0.510745	0.352429	-1.44921	0.147278	0.768542	Gm10925
ENSMUSG00000104293	4.07407	-1.56623	1.0805	-1.44955	0.147184	0.768542	Gm38043
ENSMUSG00000015002	27.9647	-0.736931	0.509253	-1.44708	0.147874	0.769932	Efr3a
ENSMUSG00000026737	14.4218	0.936194	0.646847	1.44732	0.147808	0.769932	Pip4k2a
ENSMUSG00000040029	19.3631	-0.935017	0.646115	-1.44714	0.147859	0.769932	Ipo8
ENSMUSG00000053040	2.42773	-1.58137	1.09244	-1.44756	0.14774	0.769932	Aph1c
ENSMUSG00000020483	5.1266	1.25816	0.869651	1.44674	0.147968	0.769996	Dynll2
ENSMUSG00000015568	566.83	0.461974	0.319407	1.44635	0.148079	0.770092	Lpl
ENSMUSG00000094530	13.7707	0.504679	0.348995	1.44609	0.148152	0.770092	Gm21399
ENSMUSG00000001424	35.4368	0.664679	0.461234	1.44109	0.14956	0.770671	Snd1
ENSMUSG00000002015	53.5764	0.605868	0.420389	1.44121	0.149526	0.770671	Bcap31
ENSMUSG00000002279	10.7017	1.1461	0.794563	1.44243	0.149181	0.770671	Lmf1
ENSMUSG00000003184	54.2252	-0.614621	0.427876	-1.43645	0.150875	0.770671	Irf3
ENSMUSG00000004207	358.473	0.336058	0.23389	1.43682	0.15077	0.770671	Psap
ENSMUSG00000006527	18.8542	-0.801076	0.557349	-1.4373	0.150633	0.770671	Sfmbt1
ENSMUSG00000020807	9.51136	-1.05703	0.73385	-1.44039	0.149756	0.770671	4933427D14Rik
ENSMUSG00000024213	14.4556	0.683334	0.476364	1.43448	0.151436	0.770671	Nudt3
ENSMUSG00000024350	18.097	-1.0479	0.72805	-1.43933	0.150057	0.770671	Dnajc18
ENSMUSG00000024566	39.4656	-0.694409	0.484094	-1.43445	0.151444	0.770671	Atp9b
ENSMUSG00000024851	10.231	0.984602	0.681691	1.44435	0.14864	0.770671	Pitpnm1
ENSMUSG00000024858	14.2292	0.878056	0.609232	1.44125	0.149514	0.770671	Grk2
ENSMUSG00000025362	4.40626	0.584322	0.406958	1.43583	0.151051	0.770671	Rps26
ENSMUSG00000025816	28.8765	-0.815941	0.566622	-1.44001	0.149865	0.770671	Sec61a2
ENSMUSG00000026821	6.36985	-1.12079	0.780471	-1.43604	0.15099	0.770671	Ralgds
ENSMUSG00000027531	19.9742	1.097	0.762044	1.43956	0.149993	0.770671	Impa1
ENSMUSG00000027569	17.5278	-1.10892	0.772956	-1.43464	0.151388	0.770671	Mrgbp
ENSMUSG00000028106	51.6368	-0.721168	0.502888	-1.43405	0.151558	0.770671	Rprd2
ENSMUSG00000028399	526.904	-0.272116	0.189076	-1.43919	0.150097	0.770671	Ptprd
ENSMUSG00000028403	10.9348	-1.06302	0.738626	-1.43919	0.150097	0.770671	Zdhhc21
ENSMUSG00000029577	26.1402	-0.79012	0.5508	-1.43449	0.151431	0.770671	Ube3b
ENSMUSG00000030074	2.74746	1.35078	0.94213	1.43375	0.151644	0.770671	Gxylt2
ENSMUSG00000031568	4.65008	-1.15247	0.803023	-1.43516	0.151241	0.770671	Rwdd4a
ENSMUSG00000031913	21.1568	0.921551	0.640215	1.43944	0.150026	0.770671	Vps4a
ENSMUSG00000032185	26.4793	0.745741	0.51784	1.4401	0.14984	0.770671	Carm1
ENSMUSG00000032463	10.2186	1.41534	0.981668	1.44177	0.149368	0.770671	Faim
ENSMUSG00000033940	35.2064	0.603159	0.41977	1.43688	0.150752	0.770671	Brk1
ENSMUSG00000034297	67.4388	-0.473286	0.328402	-1.44118	0.149535	0.770671	Med13
ENSMUSG00000035107	31.2099	-0.642964	0.445715	-1.44255	0.149148	0.770671	Dcbld2
ENSMUSG00000038014	78.8158	-0.488907	0.340807	-1.43456	0.151414	0.770671	Fam120a
ENSMUSG00000038279	2.90515	-1.57887	1.09382	-1.44345	0.148895	0.770671	Nop2
ENSMUSG00000038900	5.63077	1.07504	0.749377	1.43458	0.151408	0.770671	Rpl12
ENSMUSG00000052155	57.3723	-0.518316	0.3615	-1.43379	0.151632	0.770671	Acvr2a
ENSMUSG00000055024	61.3289	-0.490407	0.339497	-1.44451	0.148596	0.770671	Ep300
ENSMUSG00000056214	13.9433	1.06807	0.744647	1.43433	0.151479	0.770671	Pard6g
ENSMUSG00000078619	19.1524	0.801259	0.556219	1.44054	0.149713	0.770671	Smarcd2
ENSMUSG00000079489	3.42868	1.358	0.943349	1.43956	0.149993	0.770671	C030013D06Rik
ENSMUSG00000097194	4.63318	-1.14929	0.795177	-1.44532	0.148368	0.770671	9330175E14Rik
ENSMUSG00000097375	6.44627	-1.06866	0.74425	-1.43589	0.151034	0.770671	6720427I07Rik
ENSMUSG00000097431	3.60445	1.50155	1.04717	1.43391	0.151598	0.770671	Gm26782
ENSMUSG00000103238	5.02756	-1.46953	1.02427	-1.4347	0.151371	0.770671	Gm36527
ENSMUSG00000005583	23.7248	-0.98301	0.685927	-1.43311	0.151826	0.771178	Mef2c
ENSMUSG00000021719	16.0707	-1.04434	0.728958	-1.43264	0.15196	0.771438	Rgs7bp
ENSMUSG00000002732	38.4142	-0.71343	0.498788	-1.43033	0.152623	0.771439	Fkbp7
ENSMUSG00000025781	41.8071	-0.602574	0.420844	-1.43182	0.152195	0.771439	Atp5c1
ENSMUSG00000026064	8.27891	-1.23056	0.860124	-1.43068	0.152523	0.771439	Ptp4a1
ENSMUSG00000029179	6.86618	1.25755	0.879376	1.43005	0.152703	0.771439	Zcchc4
ENSMUSG00000031529	35.1518	-0.610074	0.426341	-1.43095	0.152444	0.771439	Tnks
ENSMUSG00000035278	14.3098	-0.900593	0.629099	-1.43156	0.15227	0.771439	Plekhj1
ENSMUSG00000048677	15.1108	-1.02255	0.714793	-1.43056	0.152557	0.771439	Tpcn2
ENSMUSG00000051730	3.98141	1.49436	1.04334	1.43229	0.152062	0.771439	Mettl5
ENSMUSG00000062373	23.7973	-0.735762	0.514294	-1.43062	0.152538	0.771439	Tmem65
ENSMUSG00000027624	16.196	-0.987589	0.69099	-1.42924	0.152936	0.771781	Epb41l1
ENSMUSG00000038683	5.35559	-1.45698	1.01938	-1.42928	0.152924	0.771781	Pak1ip1
ENSMUSG00000024598	6.92508	1.577	1.10389	1.42859	0.153123	0.772099	Fbn2
ENSMUSG00000097290	7.01098	1.39885	0.979284	1.42844	0.153164	0.772099	1300002E11Rik
ENSMUSG00000026879	65.9829	-0.600468	0.420674	-1.42739	0.153466	0.772789	Gsn
ENSMUSG00000032526	2.5087	-1.39037	0.973899	-1.42764	0.153396	0.772789	Ss18l2
ENSMUSG00000019710	11.2421	-1.14331	0.801241	-1.42693	0.153601	0.77305	Mrpl24
ENSMUSG00000050900	3.65357	1.04644	0.733605	1.42643	0.153744	0.77334	Gm7327
ENSMUSG00000055319	19.4162	0.922552	0.646881	1.42615	0.153824	0.77334	Sec23ip
ENSMUSG00000004270	39.6203	0.924916	0.649205	1.42469	0.154247	0.773594	Lpcat3
ENSMUSG00000015944	3.48	0.9335	0.655752	1.42356	0.154575	0.773594	Gatsl2
ENSMUSG00000024050	7.2194	1.00713	0.706999	1.42452	0.154296	0.773594	Wiz
ENSMUSG00000026565	18.0886	-0.888973	0.624399	-1.42373	0.154526	0.773594	Pou2f1
ENSMUSG00000028789	15.3285	-1.11282	0.781798	-1.42341	0.154617	0.773594	Azin2
ENSMUSG00000034108	23.7388	1.02221	0.717446	1.42479	0.154217	0.773594	Ccs
ENSMUSG00000034463	101.712	0.482831	0.33897	1.42441	0.154329	0.773594	Scara3
ENSMUSG00000060002	16.6893	0.873403	0.612647	1.42562	0.153978	0.773594	Chpt1
ENSMUSG00000067851	46.5157	-0.609683	0.428328	-1.4234	0.15462	0.773594	Arfgef1
ENSMUSG00000040007	8.81857	-1.29374	0.909272	-1.42283	0.154786	0.774012	Bahd1
ENSMUSG00000021728	62.0778	0.710683	0.500774	1.41917	0.15585	0.774953	Emb
ENSMUSG00000024581	12.8398	-1.08006	0.761238	-1.41882	0.155952	0.774953	Napg
ENSMUSG00000026374	37.8	0.770815	0.543302	1.41876	0.155969	0.774953	Tsn
ENSMUSG00000026811	22.7568	-0.756288	0.532556	-1.42011	0.155576	0.774953	St6galnac6
ENSMUSG00000031556	47.0075	0.777269	0.547826	1.41882	0.15595	0.774953	Tm2d2
ENSMUSG00000031954	25.7141	0.761826	0.536395	1.42027	0.155528	0.774953	Cfdp1
ENSMUSG00000036893	53.982	-0.626263	0.4414	-1.41881	0.155955	0.774953	Ehmt1
ENSMUSG00000037197	6.73504	-1.11865	0.78744	-1.42062	0.155428	0.774953	Rbm17
ENSMUSG00000038095	90.9712	-0.54661	0.385135	-1.41927	0.155821	0.774953	Sbno1
ENSMUSG00000039901	12.2615	-1.17379	0.827266	-1.41888	0.155935	0.774953	9130011E15Rik
ENSMUSG00000039942	12.6267	-1.17614	0.828453	-1.41968	0.155702	0.774953	Ptger4
ENSMUSG00000041895	24.249	-0.585111	0.411826	-1.42077	0.155383	0.774953	Wipi1
ENSMUSG00000022676	127.129	0.551246	0.3887	1.41818	0.156139	0.775285	Snai2
ENSMUSG00000081729	2.68706	-1.05408	0.743376	-1.41796	0.156202	0.775285	Hspa9-ps1
ENSMUSG00000006289	17.0581	-0.970937	0.685212	-1.41699	0.156486	0.775473	Osgep
ENSMUSG00000019797	6.31961	1.25777	0.887501	1.41721	0.156423	0.775473	1700021F05Rik
ENSMUSG00000035885	25.7417	0.510896	0.360553	1.41698	0.156489	0.775473	Cox8a
ENSMUSG00000031862	18.6513	-0.872472	0.61665	-1.41486	0.15711	0.777186	Atp13a1
ENSMUSG00000039768	29.8756	1.11151	0.78586	1.41438	0.15725	0.777186	Dnajc11
ENSMUSG00000041891	50.6869	-0.608864	0.430465	-1.41443	0.157234	0.777186	Lman1
ENSMUSG00000047657	3.2529	0.930025	0.657387	1.41473	0.157147	0.777186	Crry-ps
ENSMUSG00000058672	14.6104	-0.862166	0.609348	-1.4149	0.157098	0.777186	Tubb2a
ENSMUSG00000030538	24.6535	0.920021	0.650638	1.41403	0.157353	0.777286	Cib1
ENSMUSG00000020994	49.5225	-0.700182	0.495714	-1.41247	0.157812	0.778315	Pnn
ENSMUSG00000030583	5.06675	0.995853	0.704952	1.41265	0.157758	0.778315	Sipa1l3
ENSMUSG00000100394	3.76128	1.42016	1.0053	1.41268	0.157751	0.778315	Gm28791
ENSMUSG00000001143	43.8745	-0.805674	0.572442	-1.40743	0.159299	0.778451	Lman2l
ENSMUSG00000001829	5.62031	-1.18138	0.83729	-1.41095	0.158258	0.778451	Clpb
ENSMUSG00000004642	31.582	-0.635436	0.451145	-1.4085	0.158984	0.778451	Slbp
ENSMUSG00000021809	7.68345	1.24958	0.88719	1.40847	0.158993	0.778451	Nudt13
ENSMUSG00000022043	38.031	-0.677548	0.480953	-1.40876	0.158905	0.778451	Trim35
ENSMUSG00000028494	20.146	-1.10233	0.781942	-1.40973	0.158618	0.778451	Plin2
ENSMUSG00000029486	5.82507	-1.32829	0.942485	-1.40935	0.158732	0.778451	Mrpl1
ENSMUSG00000031536	11.6279	1.03506	0.734818	1.40859	0.158955	0.778451	Polb
ENSMUSG00000031696	35.7111	-0.747747	0.530406	-1.40976	0.15861	0.778451	Vps35
ENSMUSG00000032179	71.6481	-0.564688	0.401297	-1.40716	0.15938	0.778451	Bmp5
ENSMUSG00000037736	239.78	-0.666691	0.472482	-1.41104	0.158232	0.778451	Limch1
ENSMUSG00000043940	64.745	0.517934	0.368108	1.40702	0.159422	0.778451	Wdfy3
ENSMUSG00000043998	33.3585	0.812287	0.575806	1.4107	0.158334	0.778451	Mgat2
ENSMUSG00000046434	8.5898	-0.696634	0.494737	-1.40809	0.159104	0.778451	Hnrnpa1
ENSMUSG00000046447	26.1822	-0.721486	0.511537	-1.41043	0.158413	0.778451	Camk2n1
ENSMUSG00000052560	22.0998	-0.847814	0.602248	-1.40775	0.159206	0.778451	Cpne8
ENSMUSG00000075324	23.1125	-0.825078	0.584895	-1.41064	0.15835	0.778451	Fign
ENSMUSG00000079020	7.50122	-1.12343	0.798302	-1.40728	0.159345	0.778451	Slc45a4
ENSMUSG00000092837	23.7064	-0.368135	0.261363	-1.40852	0.158977	0.778451	Rpph1
ENSMUSG00000078578	100.819	-0.43623	0.310103	-1.40673	0.159508	0.778466	Ube2d3
ENSMUSG00000023034	22.374	0.884831	0.629354	1.40594	0.159743	0.778632	Nr4a1
ENSMUSG00000025404	25.4818	-0.613341	0.436486	-1.40518	0.159968	0.778632	R3hdm2
ENSMUSG00000031392	30.3719	-0.749807	0.533457	-1.40556	0.159854	0.778632	Irak1
ENSMUSG00000041849	7.95319	-1.3607	0.967838	-1.40592	0.159748	0.778632	Card6
ENSMUSG00000042622	2.5395	-1.53536	1.09277	-1.40501	0.160019	0.778632	Maff
ENSMUSG00000071379	11.1041	1.35525	0.964639	1.40493	0.160042	0.778632	Hpcal1
ENSMUSG00000026150	30.25	0.801365	0.570753	1.40405	0.160304	0.779502	Mff
ENSMUSG00000001151	27.309	-0.784466	0.559149	-1.40296	0.160628	0.78017	Pcnt
ENSMUSG00000002052	25.2833	-0.890157	0.634581	-1.40275	0.160692	0.78017	Supt6
ENSMUSG00000057113	16.8358	-0.541423	0.385941	-1.40287	0.160657	0.78017	Npm1
ENSMUSG00000064127	38.8057	-0.751361	0.536153	-1.40139	0.161097	0.781729	Med14
ENSMUSG00000043090	27.7948	-0.993431	0.709033	-1.40111	0.161182	0.781738	Zfp866
ENSMUSG00000015202	11.52	-0.871579	0.622216	-1.40077	0.161284	0.781826	Magi1
ENSMUSG00000097141	2.65715	-1.24755	0.890931	-1.40028	0.16143	0.782128	Gm10524
ENSMUSG00000042541	22.9482	-0.482947	0.345199	-1.39904	0.161801	0.783053	Sem1
ENSMUSG00000042548	25.952	0.805357	0.575695	1.39893	0.161834	0.783053	Asxl1
ENSMUSG00000081113	4.42233	0.43574	0.311509	1.3988	0.161872	0.783053	Gm7308
ENSMUSG00000020705	29.4874	0.622168	0.445228	1.39741	0.162289	0.783357	Ddx42
ENSMUSG00000035671	9.81342	-1.17506	0.841012	-1.3972	0.162354	0.783357	Zswim4
ENSMUSG00000048379	13.6741	1.04717	0.74932	1.39749	0.162266	0.783357	Socs4
ENSMUSG00000053411	25.0262	-0.792169	0.566954	-1.39724	0.162342	0.783357	Cbx7
ENSMUSG00000079427	5.69151	-0.916217	0.655574	-1.39758	0.162239	0.783357	Mthfsl
ENSMUSG00000075415	15.4984	-0.968214	0.693116	-1.3969	0.162444	0.783384	Fnbp1
ENSMUSG00000005803	9.63843	-1.11987	0.801896	-1.39653	0.162556	0.783467	Sqor
ENSMUSG00000032757	13.1073	0.990009	0.709454	1.39545	0.16288	0.783467	Bet1
ENSMUSG00000040548	5.49946	-1.15265	0.826007	-1.39545	0.16288	0.783467	Tex2
ENSMUSG00000041354	15.2688	0.968763	0.694081	1.39575	0.16279	0.783467	Rgl2
ENSMUSG00000073676	5.95952	-0.884846	0.633753	-1.3962	0.162654	0.783467	Hspe1
ENSMUSG00000020089	1.49437	1.28514	0.921442	1.39471	0.163103	0.783714	Ppa1
ENSMUSG00000028076	67.7372	0.609041	0.436612	1.39492	0.163038	0.783714	Cd1d1
ENSMUSG00000090272	15.5379	-0.808263	0.57963	-1.39445	0.163183	0.783714	Mndal
ENSMUSG00000021156	48.0477	-0.50794	0.364808	-1.39235	0.163817	0.78559	Zmynd11
ENSMUSG00000028854	15.8182	-0.83752	0.601616	-1.39212	0.163887	0.78559	Slc9a1
ENSMUSG00000070462	9.69848	1.00384	0.72127	1.39176	0.163994	0.78559	Tlnrd1
ENSMUSG00000073987	35.3201	0.78103	0.561108	1.39194	0.16394	0.78559	Ggh
ENSMUSG00000080824	3.98352	0.941888	0.676535	1.39222	0.163855	0.78559	Gm9001
ENSMUSG00000024290	53.5928	-0.5736	0.412229	-1.39146	0.164086	0.785629	Rock1
ENSMUSG00000027540	79.0135	-0.539618	0.387888	-1.39117	0.164174	0.785648	Ptpn1
ENSMUSG00000031370	14.7818	-0.893129	0.642223	-1.39068	0.164321	0.78595	Zrsr2
ENSMUSG00000002249	6.95107	-0.967508	0.709825	-1.36302	0.172875	0.786559	Tead3
ENSMUSG00000004931	12.4682	-1.13934	0.828632	-1.37497	0.169141	0.786559	Apba3
ENSMUSG00000007570	7.80784	-1.35534	0.987098	-1.37305	0.169736	0.786559	Fance
ENSMUSG00000012483	8.25954	0.811925	0.588237	1.38027	0.167504	0.786559	Rpa3
ENSMUSG00000014426	6.89395	-1.00949	0.74185	-1.36077	0.173587	0.786559	Map3k4
ENSMUSG00000014606	32.4244	1.02453	0.745152	1.37493	0.169153	0.786559	Slc25a11
ENSMUSG00000016481	36.3394	0.703309	0.510624	1.37735	0.168403	0.786559	Cr1l
ENSMUSG00000017999	7.42597	-1.33702	0.978029	-1.36705	0.171609	0.786559	Ddx27
ENSMUSG00000019494	31.1984	0.858288	0.632258	1.3575	0.174624	0.786559	Cops6
ENSMUSG00000019810	32.6741	0.94672	0.696949	1.35838	0.174344	0.786559	Fuca2
ENSMUSG00000019820	113.942	-0.471536	0.343532	-1.37261	0.169873	0.786559	Utrn
ENSMUSG00000019837	5.46972	1.47981	1.07807	1.37266	0.169859	0.786559	Gtf3c6
ENSMUSG00000020218	95.6306	-0.791461	0.571808	-1.38414	0.166317	0.786559	Wif1
ENSMUSG00000020375	6.55772	-1.22829	0.900807	-1.36354	0.172712	0.786559	Rufy1
ENSMUSG00000020614	50.6331	-0.748373	0.541966	-1.38085	0.167326	0.786559	Fam20a
ENSMUSG00000020821	21.4556	-0.786492	0.56902	-1.38219	0.166914	0.786559	Kif1c
ENSMUSG00000021007	5.97961	-1.42318	1.02774	-1.38476	0.166126	0.786559	Spata7
ENSMUSG00000021432	10.8019	-1.14372	0.825335	-1.38577	0.165818	0.786559	Slc35b3
ENSMUSG00000021470	10.5331	-1.1305	0.819978	-1.37869	0.16799	0.786559	Ercc6l2
ENSMUSG00000021559	65.4726	-0.578952	0.422074	-1.37169	0.170161	0.786559	Dapk1
ENSMUSG00000021693	7.84467	-1.05447	0.762333	-1.38321	0.1666	0.786559	Kif2a
ENSMUSG00000021764	24.1596	0.610644	0.439513	1.38936	0.164722	0.786559	Ndufs4
ENSMUSG00000021796	63.0978	-0.520588	0.377615	-1.37862	0.168012	0.786559	Bmpr1a
ENSMUSG00000021807	12.5321	0.655937	0.483115	1.35772	0.174551	0.786559	Rtraf
ENSMUSG00000021900	26.2323	0.898669	0.661457	1.35862	0.174267	0.786559	Btd
ENSMUSG00000022607	28.5652	0.775971	0.564928	1.37358	0.169573	0.786559	Ptk2
ENSMUSG00000022812	59.053	-0.524084	0.383144	-1.36785	0.171358	0.786559	Gsk3b
ENSMUSG00000023764	6.0112	-0.859027	0.620097	-1.38531	0.165957	0.786559	Sfi1
ENSMUSG00000024070	57.5831	-0.583571	0.421811	-1.38349	0.166515	0.786559	Prkd3
ENSMUSG00000024079	7.85584	1.27568	0.938108	1.35984	0.173881	0.786559	Eif2ak2
ENSMUSG00000024404	20.0379	-0.760712	0.557219	-1.36519	0.172192	0.786559	Riok3
ENSMUSG00000024792	10.2958	1.13224	0.820314	1.38025	0.16751	0.786559	Zfpl1
ENSMUSG00000024909	133.016	0.438846	0.322115	1.36239	0.173075	0.786559	Efemp2
ENSMUSG00000025138	36.3479	-0.938508	0.67656	-1.38718	0.165388	0.786559	Sirt7
ENSMUSG00000025428	164.038	0.489233	0.353578	1.38366	0.166461	0.786559	Atp5a1
ENSMUSG00000025439	17.7888	-0.905199	0.65781	-1.37608	0.168797	0.786559	Clns1a
ENSMUSG00000026478	137.36	-0.371442	0.270632	-1.3725	0.169908	0.786559	Lamc1
ENSMUSG00000027983	2.67585	1.51357	1.10116	1.37452	0.169279	0.786559	Cyp2u1
ENSMUSG00000028093	3.12826	1.49484	1.09803	1.36138	0.173394	0.786559	Acp6
ENSMUSG00000028224	11.0763	-1.04566	0.767233	-1.3629	0.172913	0.786559	Nbn
ENSMUSG00000028256	6.49752	-1.18303	0.861743	-1.37284	0.169804	0.786559	Odf2l
ENSMUSG00000028496	8.84584	-1.14701	0.828986	-1.38362	0.166473	0.786559	Mllt3
ENSMUSG00000028560	6.05781	-1.09701	0.801132	-1.36933	0.170896	0.786559	Usp1
ENSMUSG00000028576	6.1636	1.24792	0.911539	1.36903	0.17099	0.786559	Ift74
ENSMUSG00000028578	3.87837	1.31778	0.956972	1.37703	0.168502	0.786559	Caap1
[truncated: 7,347 more rows]

## Sheet: OPr like DEG
Ensembl ID	baseMean	log2Fold Change	lfcSE	stat	P-value	Padj	Gene Symbol
ENSMUSG00000015950	59.6839	-11.8044	1.10256	-10.7063	9.50744e-27	8.22394e-23	Ncf1
ENSMUSG00000020120	283.471	-9.06443	0.860017	-10.5398	5.66052e-26	2.44818e-22	Plek
ENSMUSG00000039232	101.552	-7.68599	0.734041	-10.4708	1.17665e-25	3.39268e-22	Stx11
ENSMUSG00000027398	699.218	-13.3141	1.3722	-9.70272	2.9356e-22	5.07859e-19	Il1b
ENSMUSG00000047420	32.2706	11.1416	1.14643	9.71852	2.51406e-22	5.07859e-19	Fam180a
ENSMUSG00000056054	561.536	-12.8255	1.34221	-9.55549	1.22998e-21	1.77322e-18	S100a8
ENSMUSG00000027737	79.9984	-9.56461	1.03485	-9.24252	2.40753e-20	2.97502e-17	Slc7a11
ENSMUSG00000048120	128.492	-11.1261	1.25302	-8.87943	6.72011e-19	7.26612e-16	Entpd1
ENSMUSG00000069516	255.631	-9.70108	1.09677	-8.84512	9.1426e-19	8.78706e-16	Lyz2
ENSMUSG00000029334	71.2535	11.8364	1.34468	8.80245	1.33859e-18	1.15788e-15	Prkg2
ENSMUSG00000067235	62.139	-9.2808	1.08217	-8.57608	9.81614e-18	7.71906e-15	H2-Q10
ENSMUSG00000031722	180.168	-6.43012	0.760542	-8.45466	2.79893e-17	2.01756e-14	Hp
ENSMUSG00000026271	70.9455	-8.0301	0.993362	-8.08376	6.28002e-16	4.17863e-13	Gpr35
ENSMUSG00000052854	13.8321	8.98042	1.16286	7.7227	1.13887e-14	7.0366e-12	Nrk
ENSMUSG00000087149	39.0068	8.46219	1.09749	7.71053	1.25297e-14	7.22544e-12	Itih5l-ps
ENSMUSG00000049775	650.226	-4.32126	0.569676	-7.58547	3.31286e-14	1.79101e-11	Tmsb4x
ENSMUSG00000000290	38.8671	-8.1385	1.07435	-7.5753	3.58286e-14	1.82304e-11	Itgb2
ENSMUSG00000020089	457.757	5.68643	0.781383	7.27739	3.40353e-13	1.63558e-10	Ppa1
ENSMUSG00000024661	2237	-2.68435	0.374236	-7.17289	7.34328e-13	3.34313e-10	Fth1
ENSMUSG00000056071	1014.58	-10.3286	1.44975	-7.12441	1.0453e-12	4.52094e-10	S100a9
ENSMUSG00000084289	99.4271	-2.74244	0.39105	-7.01302	2.33233e-12	9.60697e-10	Gm6977
ENSMUSG00000019278	61.7107	-6.50996	0.936181	-6.95374	3.55734e-12	1.39868e-09	Dpep1
ENSMUSG00000051439	622.358	-9.59759	1.41048	-6.80448	1.01414e-11	3.81406e-09	Cd14
ENSMUSG00000032332	293.094	4.48065	0.66414	6.74655	1.514e-11	5.4567e-09	Col12a1
ENSMUSG00000089855	38.3667	-2.69666	0.413208	-6.52616	6.74772e-11	2.33471e-08	Gm15662
ENSMUSG00000022483	4955.52	5.32369	0.819161	6.49896	8.08792e-11	2.69079e-08	Col2a1
ENSMUSG00000032946	19.3511	-6.69386	1.03956	-6.43911	1.2018e-10	3.8502e-08	Rasgrp2
ENSMUSG00000001156	279.351	-5.39368	0.8466	-6.37099	1.8781e-10	5.802e-08	Mxd1
ENSMUSG00000020520	24.2282	6.30368	1.00361	6.28097	3.36463e-10	1.00359e-07	Galnt10
ENSMUSG00000045763	58.6683	-7.70732	1.23636	-6.2339	4.54967e-10	1.31182e-07	Basp1
ENSMUSG00000020583	236.961	6.68014	1.08237	6.17179	6.75203e-10	1.79935e-07	Matn3
ENSMUSG00000032373	29.9057	7.40431	1.20021	6.16918	6.86456e-10	1.79935e-07	Car12
ENSMUSG00000035274	13.4426	7.16652	1.16138	6.17071	6.79839e-10	1.79935e-07	Tpbg
ENSMUSG00000027435	8.3094	-6.79891	1.14386	-5.94384	2.78419e-09	7.08331e-07	Cd93
ENSMUSG00000009876	13.1764	6.46737	1.10578	5.84872	4.95382e-09	1.2243e-06	Cox4i2
ENSMUSG00000018293	230.088	-2.73939	0.472088	-5.8027	6.52538e-09	1.5679e-06	Pfn1
ENSMUSG00000048612	13.4122	5.74248	0.9922	5.78763	7.1387e-09	1.66891e-06	Myof
ENSMUSG00000027750	24.8359	7.04897	1.21997	5.77798	7.56038e-09	1.72098e-06	Postn
ENSMUSG00000022351	13.0142	6.21977	1.09368	5.68701	1.29281e-08	2.86739e-06	Sqle
ENSMUSG00000022548	895.857	-6.40722	1.1332	-5.65411	1.56652e-08	3.38761e-06	Apod
ENSMUSG00000027907	53.2882	-3.40506	0.609338	-5.58813	2.29532e-08	4.84256e-06	S100a11
ENSMUSG00000049313	113.217	-5.56861	1.00075	-5.56445	2.6298e-08	5.41614e-06	Sorl1
ENSMUSG00000020077	465.55	-5.05532	0.910847	-5.55014	2.85449e-08	5.74217e-06	Srgn
ENSMUSG00000028729	15.2823	4.59681	0.830675	5.53382	3.13329e-08	6.15977e-06	Ebna1bp2
ENSMUSG00000031906	154.252	6.39421	1.16837	5.47275	4.43104e-08	8.51009e-06	Smpd3
ENSMUSG00000032596	13.6821	-6.47811	1.18451	-5.46901	4.5256e-08	8.51009e-06	Uba7
ENSMUSG00000024965	13.5585	-5.52544	1.01183	-5.46085	4.73871e-08	8.72125e-06	Fermt3
ENSMUSG00000060924	3.35968	-5.44728	1.01596	-5.36168	8.24496e-08	1.48581e-05	Csmd1
ENSMUSG00000039934	26.4681	-6.58686	1.23856	-5.31815	1.04826e-07	1.85051e-05	Gsap
ENSMUSG00000058975	36.5837	-5.38635	1.02677	-5.24591	1.55514e-07	2.6904e-05	Kcnc1
ENSMUSG00000028599	115.472	-5.83534	1.11908	-5.21443	1.8438e-07	3.12724e-05	Tnfrsf1b
ENSMUSG00000063628	6.9247	-3.58265	0.687611	-5.21028	1.88551e-07	3.13647e-05	Gm7665
ENSMUSG00000026147	451.765	4.8797	0.939024	5.19656	2.03007e-07	3.25187e-05	Col9a1
ENSMUSG00000078238	10.3691	-3.34186	0.642764	-5.19921	2.00137e-07	3.25187e-05	Gm12854
ENSMUSG00000026360	19.9637	-6.4657	1.24664	-5.18652	2.14264e-07	3.36978e-05	Rgs2
ENSMUSG00000034473	16.4033	4.95463	0.966554	5.12608	2.95835e-07	4.5696e-05	Sec22a
ENSMUSG00000027966	483.833	4.19996	0.820094	5.12132	3.03409e-07	4.60437e-05	Col11a1
ENSMUSG00000006732	8.71098	4.3851	0.860688	5.09487	3.48973e-07	5.11631e-05	Mettl1
ENSMUSG00000025499	11.7015	5.57415	1.09363	5.0969	3.45257e-07	5.11631e-05	Hras
ENSMUSG00000001946	9.53966	-5.83952	1.14721	-5.09021	3.57668e-07	5.15638e-05	Esam
ENSMUSG00000056501	262.384	-3.19409	0.628708	-5.0804	3.76635e-07	5.17126e-05	Cebpb
ENSMUSG00000068631	5.09178	-3.91661	0.770314	-5.08443	3.68727e-07	5.17126e-05	Gm7676
ENSMUSG00000106320	4.60359	4.95325	0.974725	5.08169	3.74083e-07	5.17126e-05	Gm42992
ENSMUSG00000026675	16.3185	5.55412	1.09619	5.06677	4.04632e-07	5.46885e-05	Hsd17b7
ENSMUSG00000018648	14.091	6.07916	1.20743	5.03479	4.78377e-07	6.3661e-05	Dusp14
ENSMUSG00000027506	79.3706	-4.7317	0.946788	-4.99763	5.80385e-07	7.60656e-05	Tpd52
ENSMUSG00000099104	79.9897	-2.17549	0.437962	-4.9673	6.78926e-07	8.76524e-05	Gm17087
ENSMUSG00000024042	75.3082	-3.49921	0.709643	-4.93095	8.183e-07	0.000104093	Sik1
ENSMUSG00000028664	10.4151	5.32942	1.08532	4.91047	9.08574e-07	0.000112274	Ephb2
ENSMUSG00000030551	6.9136	-5.18558	1.05545	-4.91314	8.96312e-07	0.000112274	Nr2f2
ENSMUSG00000034432	30.2359	3.68962	0.754971	4.88711	1.02329e-06	0.000124669	Cops8
ENSMUSG00000024065	11.3377	5.76244	1.17986	4.884	1.03953e-06	0.000124889	Ehd3
ENSMUSG00000063430	8.92793	5.40843	1.11019	4.87162	1.10684e-06	0.000131153	Wscd2
ENSMUSG00000052681	242.546	-2.48914	0.512068	-4.86096	1.16819e-06	0.000136552	Rap1b
ENSMUSG00000020334	10.3568	5.74356	1.18261	4.8567	1.19359e-06	0.00013766	Slc22a4
ENSMUSG00000028700	8.94701	4.96656	1.02346	4.85273	1.21776e-06	0.000138601	Pomgnt1
ENSMUSG00000022555	170.625	-4.26686	0.880656	-4.84509	1.26555e-06	0.000142169	Dgat1
ENSMUSG00000046862	5.63636	5.24206	1.09632	4.78148	1.74006e-06	0.000192969	Pramef8
ENSMUSG00000018593	6210.39	2.16769	0.454241	4.77212	1.82293e-06	0.0001996	Sparc
ENSMUSG00000049690	9.90669	5.31999	1.11626	4.76591	1.88001e-06	0.000203276	Nckap5
ENSMUSG00000017132	67.1335	-3.93725	0.826776	-4.76218	1.91517e-06	0.000204522	Cyth1
ENSMUSG00000009030	5.66419	4.58504	0.965316	4.74978	2.03634e-06	0.000214809	Pdcl
ENSMUSG00000032000	35.6338	-4.78038	1.00789	-4.74295	2.10625e-06	0.000219507	Birc3
ENSMUSG00000041559	1286.58	3.39992	0.722017	4.70893	2.49027e-06	0.000256438	Fmod
ENSMUSG00000071567	5.08996	5.01554	1.06672	4.70182	2.57858e-06	0.000262408
ENSMUSG00000018736	265.085	-2.86757	0.61063	-4.69608	2.65207e-06	0.000266749	Ndel1
ENSMUSG00000019817	50.5146	3.52316	0.75381	4.6738	2.95673e-06	0.000293974	Plagl1
ENSMUSG00000027411	8.25582	5.29571	1.1345	4.66787	3.04339e-06	0.000299151	Vps16
ENSMUSG00000025776	159.591	3.71218	0.799187	4.64494	3.40175e-06	0.00033062	Crispld1
ENSMUSG00000001521	6.20405	4.71186	1.02262	4.60761	4.07316e-06	0.00038682	Tulp3
ENSMUSG00000014158	59.5107	4.42555	0.961391	4.60328	4.15887e-06	0.00038682	Trpv4
ENSMUSG00000022500	293.128	-2.87316	0.623968	-4.60465	4.13151e-06	0.00038682	Litaf
ENSMUSG00000031703	19.8628	3.1541	0.684273	4.60942	4.03794e-06	0.00038682	Itfg1
ENSMUSG00000025161	121.234	-5.58844	1.22185	-4.57374	4.79092e-06	0.000440866	Slc16a3
ENSMUSG00000024772	68.6773	-3.72308	0.814851	-4.56904	4.89968e-06	0.000441481	Ehd1
ENSMUSG00000026888	29.1636	5.59947	1.22501	4.57097	4.85466e-06	0.000441481	Grb14
ENSMUSG00000061024	5.86149	5.14156	1.12727	4.56106	5.08955e-06	0.000453862	Rrs1
ENSMUSG00000039137	7.66098	4.21859	0.926224	4.55461	5.24825e-06	0.000463238	Whrn
ENSMUSG00000022620	11.2653	4.03938	0.894457	4.51601	6.30152e-06	0.000545082	Arsa
ENSMUSG00000026153	4.72386	4.36491	0.966427	4.51654	6.28573e-06	0.000545082	Fam135a
ENSMUSG00000003810	19.6032	3.46064	0.767021	4.5118	6.42804e-06	0.00055052	Mast2
ENSMUSG00000033319	48.4322	-4.03881	0.897146	-4.50184	6.73685e-06	0.000571311	Fem1c
ENSMUSG00000053641	147.66	-3.30546	0.736277	-4.48942	7.14161e-06	0.000599757	Dennd4a
ENSMUSG00000029338	93.4676	-3.32973	0.743148	-4.48058	7.44415e-06	0.000618283	Antxr2
ENSMUSG00000046618	19.2951	-4.6554	1.03942	-4.47883	7.50516e-06	0.000618283	Olfml2a
ENSMUSG00000087604	9.0569	-2.32817	0.520419	-4.47364	7.68997e-06	0.000627531	Cdrt4os1
ENSMUSG00000060477	29.496	-5.0203	1.1237	-4.46767	7.9075e-06	0.000639251	Irak2
ENSMUSG00000029580	2493.48	-1.79973	0.404413	-4.45024	8.57734e-06	0.000680679	Actb
ENSMUSG00000056966	10.7393	5.20097	1.16853	4.45086	8.55282e-06	0.000680679	Gjc3
ENSMUSG00000044026	6.53766	4.87972	1.10011	4.43564	9.17977e-06	0.000721864	Slc35g1
ENSMUSG00000029757	12.0169	4.82506	1.09182	4.41928	9.90303e-06	0.000771723	Dync1i1
ENSMUSG00000022142	4.70643	4.3376	0.983066	4.41232	1.0227e-05	0.00078286	Nup155
ENSMUSG00000022883	9.23107	4.63936	1.0513	4.41296	1.01966e-05	0.00078286	Robo1
ENSMUSG00000021061	6.01507	-5.11063	1.16032	-4.4045	1.06028e-05	0.00080451	Sptb
ENSMUSG00000042677	49.3067	-4.65437	1.05778	-4.40011	1.08195e-05	0.000813812	Zc3h12a
ENSMUSG00000048126	430.855	3.0303	0.689511	4.39485	1.10849e-05	0.000826591	Col6a3
ENSMUSG00000028517	74.3641	-2.93577	0.671101	-4.37456	1.21677e-05	0.00089958	Plpp3
ENSMUSG00000042988	7.48496	5.30693	1.21821	4.35634	1.32258e-05	0.000969518	Notum
ENSMUSG00000026202	31.6916	-4.53878	1.04254	-4.35357	1.33939e-05	0.000973592	Tuba4a
ENSMUSG00000042854	2.5513	-3.64093	0.836663	-4.35173	1.3507e-05	0.000973627	Trp53rkb
ENSMUSG00000035181	12.731	3.76831	0.873897	4.31208	1.61726e-05	0.0011504	Heatr5a
ENSMUSG00000091313	2.32241	-3.8261	0.887445	-4.31136	1.62253e-05	0.0011504	Fth-ps2
ENSMUSG00000027508	17.5075	-4.84106	1.1328	-4.27355	1.92386e-05	0.00135296	Pag1
ENSMUSG00000028541	11.2766	4.45411	1.04309	4.27011	1.95375e-05	0.0013629	B4galt2
ENSMUSG00000038936	3.76888	4.50245	1.06205	4.2394	2.24121e-05	0.00155092	Sccpdh
ENSMUSG00000034930	5.40307	4.73446	1.1175	4.23664	2.2689e-05	0.00155762	Rtkn
ENSMUSG00000042254	36.0102	3.04842	0.720385	4.23166	2.31977e-05	0.00158	Cilp
ENSMUSG00000024511	4.88665	4.56652	1.08023	4.22736	2.36445e-05	0.00159785	Rab27b
ENSMUSG00000097162	1.1071	-3.27842	0.776097	-4.22424	2.39744e-05	0.00160758	2310010J17Rik
ENSMUSG00000045045	5.16048	4.53266	1.07519	4.21568	2.49029e-05	0.00164435	Lrfn4
ENSMUSG00000045672	173.346	3.29762	0.782222	4.21571	2.48991e-05	0.00164435	Col27a1
ENSMUSG00000027570	759.875	4.29099	1.02178	4.19952	2.67479e-05	0.0017528	Col9a3
ENSMUSG00000047281	8.33262	5.3072	1.2651	4.19509	2.72765e-05	0.001774	Sfn
ENSMUSG00000028843	66.9129	-2.93034	0.698843	-4.19313	2.75137e-05	0.00177607	Sh3bgrl3
ENSMUSG00000022676	25.4604	4.15893	0.996922	4.17177	3.02239e-05	0.00193628	Snai2
ENSMUSG00000075705	10.1469	-4.65288	1.11576	-4.17013	3.04432e-05	0.00193628	Msrb1
ENSMUSG00000094594	8.79889	-4.7693	1.14463	-4.16668	3.09069e-05	0.00195142	Tpd52-ps
ENSMUSG00000026094	66.533	-3.8338	0.921415	-4.16078	3.17166e-05	0.00197682	Stk17b
ENSMUSG00000043903	6.34889	4.81597	1.15792	4.15917	3.19412e-05	0.00197682	Zfp469
ENSMUSG00000087235	5.07094	-1.92108	0.461934	-4.15878	3.19948e-05	0.00197682	Gm4750
ENSMUSG00000048965	16.0616	-2.00404	0.482401	-4.1543	3.26291e-05	0.00200171	Mrgpre
ENSMUSG00000033295	51.9258	3.31269	0.799289	4.14454	3.40497e-05	0.00207415	Ptprf
ENSMUSG00000012535	12.9068	-3.38102	0.816308	-4.14185	3.44523e-05	0.002084	Tnpo3
ENSMUSG00000019362	133.449	-2.40054	0.580031	-4.13864	3.4937e-05	0.00209865	D8Ertd738e
ENSMUSG00000030159	4.74029	-4.63714	1.12317	-4.12862	3.6495e-05	0.00217711	Clec1b
ENSMUSG00000043415	4.84987	4.77427	1.15889	4.11969	3.79385e-05	0.00224773	Otud1
ENSMUSG00000030607	642.581	3.4253	0.834122	4.10647	4.01753e-05	0.00236406	Acan
ENSMUSG00000006519	72.5051	-2.67397	0.652965	-4.09512	4.21952e-05	0.00245145	Cyba
ENSMUSG00000031827	43.0827	-4.02619	0.983209	-4.09494	4.22272e-05	0.00245145	Cotl1
ENSMUSG00000025470	8.82195	4.64167	1.13773	4.07976	4.50827e-05	0.00259977	Zfp511
ENSMUSG00000021103	6.3563	3.86942	0.95039	4.0714	4.67309e-05	0.00267697	Mnat1
ENSMUSG00000002257	9.66808	-4.72228	1.16443	-4.05545	5.00374e-05	0.00283545	Def6
ENSMUSG00000101939	1.65101	2.747	0.677449	4.05491	5.01531e-05	0.00283545	Gm28438
ENSMUSG00000006014	321.148	3.10351	0.77396	4.00991	6.07423e-05	0.00341182	Prg4
ENSMUSG00000029465	64.2428	-3.4	0.850001	-4	6.33426e-05	0.00353493	Arpc3
ENSMUSG00000027287	63.4417	-3.00682	0.753336	-3.99134	6.5701e-05	0.00364304	Snap23
ENSMUSG00000033039	20.3657	3.83165	0.962203	3.98216	6.82922e-05	0.00376259	Micall1
ENSMUSG00000031600	8.84064	3.74953	0.945734	3.96467	7.34968e-05	0.00402372	Vps37a
ENSMUSG00000060802	287.455	-1.74011	0.43983	-3.95632	7.61138e-05	0.00414078	B2m
ENSMUSG00000097290	10.4368	-4.83907	1.22536	-3.94912	7.84406e-05	0.0042407	1300002E11Rik
ENSMUSG00000039497	18.7059	3.33801	0.846258	3.94444	7.99876e-05	0.00427094	Dse
ENSMUSG00000073411	672.047	-1.81749	0.460757	-3.94458	7.99388e-05	0.00427094	H2-D1
ENSMUSG00000033253	15.628	3.5321	0.895952	3.94228	8.07091e-05	0.00428303	Szt2
ENSMUSG00000029469	4.44146	4.66147	1.1844	3.93572	8.29478e-05	0.00437499	Ift81
ENSMUSG00000039239	37.2858	3.12258	0.793947	3.93298	8.38978e-05	0.00439828	Tgfb2
ENSMUSG00000030452	12.6818	3.89185	0.99157	3.92493	8.67535e-05	0.00452059	Nipa2
ENSMUSG00000030605	449.288	2.56298	0.654337	3.91691	8.96917e-05	0.00464571	Mfge8
ENSMUSG00000030401	13.5357	4.12675	1.05429	3.91426	9.06829e-05	0.00466909	Rtn2
ENSMUSG00000041235	92.4613	-3.56051	0.910521	-3.91041	9.21414e-05	0.00471611	Chd7
ENSMUSG00000045954	2.20103	-3.80633	0.974236	-3.90699	9.34538e-05	0.00475515	Cavin2
ENSMUSG00000094615	3.39493	-3.01884	0.773053	-3.90509	9.41917e-05	0.00476467	Gm4899
ENSMUSG00000087569	2.35385	-2.14746	0.55034	-3.90207	9.53749e-05	0.00479647	Gm8464
ENSMUSG00000001506	579.896	2.71909	0.700681	3.88064	0.00010418	0.005209	Col1a1
ENSMUSG00000021901	16.8859	4.12566	1.06602	3.87015	0.00010877	0.00536592	Bap1
ENSMUSG00000026749	20.1999	3.75182	0.969654	3.86923	0.000109179	0.00536592	Nek6
ENSMUSG00000064337	861.156	-0.822809	0.21259	-3.8704	0.000108658	0.00536592	mt-Rnr1
ENSMUSG00000042228	37.316	-5.25839	1.35974	-3.86721	0.000110086	0.0053799	Lyn
ENSMUSG00000025503	162.69	-2.91468	0.756454	-3.85308	0.00011664	0.00566819	Taldo1
ENSMUSG00000037966	128.124	-2.88902	0.751118	-3.84629	0.000119918	0.00579494	Ninj1
ENSMUSG00000027787	18.2742	3.34836	0.870955	3.84447	0.000120811	0.00580563	Nmd3
ENSMUSG00000022032	84.5611	-5.07477	1.32566	-3.82811	0.000129129	0.00617108	Scara5
ENSMUSG00000054499	38.8369	-4.99614	1.30792	-3.81991	0.0001335	0.00634494	Dedd2
ENSMUSG00000060591	94.6722	-1.86988	0.489757	-3.81799	0.000134546	0.00635968	Ifitm2
ENSMUSG00000031644	12.5564	4.06688	1.06655	3.81312	0.000137224	0.00645101	Nek1
ENSMUSG00000018401	13.2952	-4.17091	1.09548	-3.80736	0.000140457	0.00650623	Mtmr4
ENSMUSG00000020527	4.73839	4.3375	1.13933	3.80708	0.000140618	0.00650623	Myo19
ENSMUSG00000060572	24.2873	4.43305	1.16444	3.80701	0.000140655	0.00650623	Mfap2
ENSMUSG00000036856	20.7363	4.69935	1.23662	3.80015	0.000144606	0.0066534	Wnt4
ENSMUSG00000023048	40.7177	-3.55733	0.939039	-3.78826	0.000151703	0.00694303	Prr13
ENSMUSG00000106229	2.54956	4.01746	1.06866	3.75936	0.000170347	0.00775527	Gm19409
ENSMUSG00000021950	141.083	3.21239	0.856575	3.75027	0.000176642	0.00797581	Anxa8
ENSMUSG00000067786	5.93362	-2.84931	0.759874	-3.74972	0.000177035	0.00797581	Nnat
ENSMUSG00000047714	26.4899	-2.49659	0.666771	-3.74429	0.000180902	0.00810777	Ppp1r2
ENSMUSG00000001025	237.01	-1.69353	0.45359	-3.73361	0.000188757	0.00816373	S100a6
ENSMUSG00000001964	23.8298	-3.22827	0.864022	-3.73633	0.000186728	0.00816373	Emd
ENSMUSG00000005087	149.517	-2.91353	0.778824	-3.74094	0.000183336	0.00816373	Cd44
ENSMUSG00000019359	5.32405	-3.95427	1.05807	-3.73725	0.000186041	0.00816373	Gdpd2
ENSMUSG00000033542	6.10722	4.21999	1.13018	3.7339	0.000188541	0.00816373	Arhgef5
ENSMUSG00000037997	5.33236	4.47331	1.19808	3.73373	0.000188662	0.00816373	Parp11
ENSMUSG00000060098	6.8779	4.72185	1.26301	3.73855	0.000185082	0.00816373	Prmt7
ENSMUSG00000075014	23.7481	-2.25779	0.605342	-3.72977	0.000191651	0.00824767	Gm10800
ENSMUSG00000031799	236.738	-2.19341	0.588362	-3.728	0.000193004	0.00826479	Tpm4
ENSMUSG00000060467	20.6147	-1.49841	0.402554	-3.72226	0.000197451	0.00841356	Gm10080
ENSMUSG00000012405	12.5078	3.02311	0.812507	3.72072	0.000198656	0.00842339	Rpl15
ENSMUSG00000036698	81.2968	-2.17848	0.586036	-3.71732	0.00020135	0.00848668	Ago2
ENSMUSG00000069255	2.75202	3.96962	1.06815	3.71636	0.000202111	0.00848668	Dusp22
ENSMUSG00000059316	73.0426	-4.74087	1.27632	-3.71448	0.000203619	0.0085087	Slc27a4
ENSMUSG00000025323	2.98823	4.16845	1.12299	3.71191	0.000205703	0.00855449	Sp4
ENSMUSG00000002020	12.6621	3.61446	0.974489	3.70908	0.000208013	0.00860915	Ltbp2
ENSMUSG00000029063	88.0854	-3.17919	0.858236	-3.70433	0.00021195	0.00873031	Nadk
ENSMUSG00000053007	7.09067	4.48416	1.21697	3.68469	0.000228984	0.00938727	Creb5
ENSMUSG00000025453	6.67168	2.78626	0.759397	3.66904	0.000243461	0.00988702	Nnt
ENSMUSG00000032842	6.23498	4.18401	1.14002	3.67013	0.000242426	0.00988702	Abcc10
ENSMUSG00000021451	54.4253	-4.58271	1.25151	-3.66174	0.000250509	0.0101257	Sema4d
ENSMUSG00000056201	83.5208	-1.56322	0.427688	-3.65506	0.000257124	0.0103448	Cfl1
ENSMUSG00000028195	749.604	2.20285	0.603436	3.6505	0.000261726	0.0104812	Cyr61
ENSMUSG00000095440	3.12574	-1.70964	0.468819	-3.64669	0.000265637	0.0105888	Fignl2
ENSMUSG00000022443	139.785	-2.0033	0.549921	-3.64288	0.000269602	0.0106975	Myh9
ENSMUSG00000033538	25.1478	-4.19306	1.15246	-3.63834	0.000274397	0.010838	Casp4
ENSMUSG00000032872	16.242	-4.37471	1.20547	-3.62905	0.000284467	0.0111847	Cyb5r4
ENSMUSG00000034868	36.7637	-2.57231	0.709609	-3.62497	0.000288996	0.0113114	Myl12b
ENSMUSG00000014077	64.763	-2.12619	0.587998	-3.61598	0.000299216	0.0116586	Chp1
ENSMUSG00000005514	119.262	-2.76462	0.766391	-3.60732	0.000309372	0.0120003	Por
ENSMUSG00000052331	38.6793	-3.32396	0.922601	-3.60281	0.000314793	0.0121561	Ankrd44
ENSMUSG00000051344	36.458	-4.03746	1.12107	-3.60143	0.000316467	0.0121664	Plekhm3
ENSMUSG00000027472	61.8548	2.94552	0.818887	3.59698	0.00032193	0.0122674	Pdrg1
ENSMUSG00000101567	10.4472	-2.01423	0.559813	-3.59803	0.000320631	0.0122674	Txn-ps1
ENSMUSG00000021273	14.5004	3.93124	1.09625	3.58607	0.0003357	0.012736	Fdft1
ENSMUSG00000062382	0.78205	-2.16374	0.603876	-3.58309	0.00033956	0.012797	Ftl1-ps1
ENSMUSG00000092181	3.25653	-2.2741	0.634773	-3.58254	0.000340267	0.012797	Gm20432
ENSMUSG00000010936	11.663	4.05323	1.13233	3.57953	0.00034421	0.0128892	Vac14
ENSMUSG00000030499	8.69513	3.68654	1.03022	3.57838	0.000345725	0.0128902	Kctd15
ENSMUSG00000010755	20.0518	3.56592	0.99784	3.57364	0.000352057	0.0130699	Cars
ENSMUSG00000024856	91.1419	-2.91021	0.81507	-3.57051	0.000356288	0.0131144	Cdk2ap2
ENSMUSG00000045624	7.68395	3.57994	1.00247	3.57111	0.000355474	0.0131144	Esf1
ENSMUSG00000074918	23.8532	-3.23286	0.906122	-3.5678	0.000359989	0.0131945	Inafm2
ENSMUSG00000038305	18.7027	3.289	0.923594	3.56109	0.000369321	0.0134794	Spats2l
ENSMUSG00000021928	6.11208	3.61786	1.01637	3.55958	0.000371444	0.0135	Ebpl
ENSMUSG00000025371	2.60374	3.96835	1.11814	3.54907	0.000386594	0.0139194	Chmp6
ENSMUSG00000027995	54.4971	-3.87786	1.09289	-3.54827	0.000387773	0.0139194	Tlr2
ENSMUSG00000035356	273.916	-2.16583	0.610396	-3.54824	0.000387812	0.0139194	Nfkbiz
ENSMUSG00000034320	69.402	2.8713	0.809493	3.54703	0.000389595	0.0139256	Slc26a2
ENSMUSG00000000567	234.057	2.38574	0.673462	3.5425	0.000396348	0.0141087	Sox9
ENSMUSG00000015957	24.8229	3.78941	1.07116	3.53767	0.000403682	0.0141842	Wnt11
ENSMUSG00000023947	50.8664	-4.82103	1.36208	-3.53946	0.000400952	0.0141842	Nfkbie
ENSMUSG00000037656	5.41013	4.13223	1.16812	3.53749	0.000403952	0.0141842	Slc20a2
ENSMUSG00000061353	134.469	-1.97948	0.559773	-3.53622	0.000405895	0.0141842	Cxcl12
ENSMUSG00000079477	117.869	-1.82603	0.516451	-3.53572	0.000406668	0.0141842	Rab7
ENSMUSG00000053038	19.7629	-1.55358	0.43953	-3.53463	0.000408351	0.0141857	Gm6180
ENSMUSG00000097266	25.312	3.79372	1.07683	3.52305	0.000426613	0.0147608	Gm26802
ENSMUSG00000040990	44.5897	2.70169	0.767662	3.51938	0.000432559	0.0149069	Sh3kbp1
ENSMUSG00000022951	304.75	2.77101	0.788826	3.51283	0.000443364	0.0150239	Rcan1
ENSMUSG00000023243	15.3112	4.19941	1.19562	3.51232	0.000444217	0.0150239	Kcnk5
ENSMUSG00000028656	101.344	-2.31875	0.659673	-3.515	0.00043975	0.0150239	Cap1
ENSMUSG00000053965	3.14444	-4.06712	1.15831	-3.51126	0.000445992	0.0150239	Pde5a
ENSMUSG00000079499	6.62019	-4.03497	1.14923	-3.51103	0.000446373	0.0150239	6530402F18Rik
ENSMUSG00000097441	5.19512	2.97724	0.847072	3.51475	0.000440173	0.0150239	Gm26633
ENSMUSG00000034007	7.62164	3.10949	0.886204	3.50877	0.000450176	0.0150931	Scaper
ENSMUSG00000009633	152.668	-5.12107	1.46484	-3.496	0.000472285	0.0157126	G0s2
ENSMUSG00000039210	3.91724	3.8158	1.09139	3.49628	0.000471787	0.0157126	Gpatch2
ENSMUSG00000042035	37.3963	2.56765	0.734779	3.49445	0.00047504	0.0157436	Igsf3
ENSMUSG00000024953	96.8673	-2.36428	0.676842	-3.4931	0.000477447	0.015763	Prdx5
ENSMUSG00000022043	2.42805	3.68765	1.05632	3.49104	0.000481141	0.0158246	Trim35
ENSMUSG00000016262	19.105	3.18957	0.914717	3.48695	0.000488564	0.0159475	Sertad4
ENSMUSG00000024456	35.7434	-2.73134	0.783108	-3.48782	0.000486971	0.0159475	Diaph1
ENSMUSG00000035299	2.129	-3.35452	0.962525	-3.48513	0.000491903	0.0159961	Mid1
ENSMUSG00000082066	3.38698	-1.72407	0.495385	-3.48026	0.000500922	0.0162284	Gm13904
ENSMUSG00000001039	5.35326	3.86435	1.11072	3.47915	0.000503001	0.0162349	B9d1
ENSMUSG00000025185	31.8781	4.34163	1.24903	3.476	0.000508948	0.0163658	Loxl4
ENSMUSG00000059195	25.9662	-1.80033	0.518977	-3.46901	0.000522384	0.0167356	Gm12715
ENSMUSG00000021760	53.2969	2.36112	0.680869	3.4678	0.000524743	0.0167492	Gpx8
ENSMUSG00000057649	18.7759	3.40615	0.983606	3.46292	0.000534337	0.0169927	Brd9
ENSMUSG00000000275	15.4602	-3.61261	1.04538	-3.45579	0.000548685	0.0172599	Trim25
ENSMUSG00000008874	61.5941	3.61513	1.0456	3.45748	0.000545251	0.0172599	Clec3a
ENSMUSG00000037278	10.8926	3.22217	0.93286	3.45408	0.000552168	0.0172599	Tmem97
ENSMUSG00000038612	308.472	-1.67509	0.48498	-3.45394	0.000552469	0.0172599	Mcl1
ENSMUSG00000063406	32.0123	-2.65757	0.76946	-3.45381	0.000552717	0.0172599	Tmed5
ENSMUSG00000022706	9.74081	3.93698	1.14115	3.45	0.00056058	0.01738	Mrpl40
ENSMUSG00000022718	5.03502	3.85025	1.11596	3.45016	0.000560255	0.01738	Dgcr8
ENSMUSG00000018567	199.03	-1.39082	0.403602	-3.44601	0.000568919	0.0174835	Gabarap
ENSMUSG00000022895	99.709	-2.90273	0.842467	-3.44551	0.000569983	0.0174835	Ets2
ENSMUSG00000030341	103.829	-2.07965	0.603574	-3.44555	0.000569889	0.0174835	Tnfrsf1a
ENSMUSG00000037946	38.2946	-4.9519	1.43813	-3.4433	0.000574658	0.0175028	Fgd3
ENSMUSG00000078584	3.50511	3.63056	1.05429	3.44362	0.000573988	0.0175028	AU022252
ENSMUSG00000001627	555.33	-1.73665	0.506698	-3.42738	0.000609433	0.0184968	Ifrd1
ENSMUSG00000027639	94.0206	-2.97129	0.867648	-3.42453	0.000615854	0.0186263	Samhd1
ENSMUSG00000000530	17.8147	-4.14154	1.20996	-3.42288	0.000619623	0.018675	Acvrl1
ENSMUSG00000027333	124.638	-3.2235	0.942939	-3.41857	0.000629514	0.0189073	Smox
ENSMUSG00000006288	9.97778	3.76785	1.10458	3.41113	0.000646952	0.0193638	Ttc5
ENSMUSG00000035569	105.459	-1.99188	0.584304	-3.40899	0.000652039	0.0194485	Ankrd11
ENSMUSG00000040659	142.142	-3.07098	0.901094	-3.40805	0.000654281	0.0194485	Efhd2
ENSMUSG00000028007	8.75501	3.5445	1.04083	3.40545	0.000660553	0.0195677	Snx7
ENSMUSG00000024193	13.5254	-2.89263	0.855239	-3.38225	0.000718944	0.0212248	Phf1
ENSMUSG00000024948	32.8879	-3.31227	0.979635	-3.38112	0.000721897	0.0212395	Map4k2
ENSMUSG00000036943	57.2117	-3.2788	0.971157	-3.37618	0.000734991	0.0214786	Rab8b
ENSMUSG00000067377	28.7762	3.29914	0.977074	3.37655	0.000734009	0.0214786	Tspan6
ENSMUSG00000013160	82.454	-2.50304	0.742711	-3.37015	0.000751281	0.0218758	Atp6v0d1
ENSMUSG00000015839	82.5056	-2.49292	0.739907	-3.36924	0.000753768	0.0218758	Nfe2l2
ENSMUSG00000062234	31.1366	-2.17788	0.646571	-3.36836	0.000756171	0.0218758	Gak
ENSMUSG00000039043	7.22246	3.76272	1.11779	3.36621	0.000762074	0.0219731	Arpin
ENSMUSG00000063254	1.8882	3.40668	1.01238	3.36501	0.00076542	0.021995
ENSMUSG00000075288	4.90478	-1.44635	0.429937	-3.36411	0.000767917	0.021995	Gm6913
ENSMUSG00000046876	22.806	2.49194	0.741935	3.35871	0.000783086	0.0223554	Atxn1
ENSMUSG00000054728	6.33017	-3.86679	1.15296	-3.35379	0.000797139	0.0226818	Phactr1
ENSMUSG00000004032	28.1942	2.98943	0.892237	3.35048	0.000806705	0.0228787	Gstm5
ENSMUSG00000006304	202.476	-1.81368	0.542614	-3.34248	0.000830334	0.0231807	Arpc2
ENSMUSG00000030056	73.6659	-3.26097	0.97526	-3.34369	0.000826711	0.0231807	Isy1
ENSMUSG00000030849	41.9623	2.37735	0.711283	3.34234	0.000830753	0.0231807	Fgfr2
ENSMUSG00000033060	23.9671	2.73085	0.81637	3.34511	0.000822498	0.0231807	Lmo7
ENSMUSG00000039804	6.56325	3.46532	1.03668	3.34271	0.000829656	0.0231807	Ncoa5
ENSMUSG00000074794	17.6536	-3.51547	1.05213	-3.3413	0.000833875	0.023193	Arrdc3
ENSMUSG00000020794	5.613	2.96301	0.888688	3.33415	0.000855619	0.0237215	Ube2g1
ENSMUSG00000073409	11.5014	-3.12056	0.938434	-3.32529	0.000883271	0.0244099	H2-Q6
ENSMUSG00000075284	24.7749	-2.66803	0.803099	-3.32217	0.000893206	0.0246058	Wipf1
ENSMUSG00000021508	98.6347	-2.97832	0.897122	-3.31986	0.000900617	0.0247312	Cxcl14
ENSMUSG00000002210	3.03209	3.09373	0.932869	3.31636	0.000911971	0.0247713	Smg9
ENSMUSG00000021464	4.72391	3.71191	1.11943	3.31589	0.000913532	0.0247713	Ror2
ENSMUSG00000027422	168.787	1.63002	0.491385	3.3172	0.000909235	0.0247713	Rrbp1
ENSMUSG00000036478	289.601	-1.68429	0.507751	-3.31715	0.000909412	0.0247713	Btg1
ENSMUSG00000008540	39.6878	-4.36785	1.31856	-3.31259	0.000924371	0.0249869	Mgst1
ENSMUSG00000024330	520.916	2.786	0.841901	3.30918	0.000935688	0.0250579	Col11a2
ENSMUSG00000032353	85.3124	2.05738	0.621621	3.30971	0.00093392	0.0250579	Tmed3
ENSMUSG00000036242	12.612	4.18097	1.26325	3.30969	0.000933996	0.0250579	3632451O06Rik
ENSMUSG00000032925	11.1223	4.51929	1.36793	3.30375	0.000954001	0.0254501	Itgbl1
ENSMUSG00000074505	47.6527	4.25539	1.2883	3.3031	0.000956216	0.0254501	Fat3
ENSMUSG00000022564	210.77	-2.6354	0.798915	-3.29872	0.000971271	0.0257714	Grina
ENSMUSG00000050708	56.2239	-1.42498	0.432277	-3.29646	0.000979106	0.0258999	Ftl1
ENSMUSG00000025978	22.985	2.56675	0.78072	3.28766	0.00101023	0.0266416	Rftn2
ENSMUSG00000052539	9.46252	-3.20515	0.976105	-3.28361	0.00102486	0.0269454	Magi3
ENSMUSG00000020232	10.2088	-2.2643	0.690081	-3.28122	0.0010336	0.027011	Hmg20b
ENSMUSG00000097041	3.41828	-1.91855	0.584686	-3.28134	0.00103317	0.027011	Pafah1b1-ps1
ENSMUSG00000075706	16.2011	-1.65888	0.505797	-3.27974	0.00103902	0.0270708	Gpx4
ENSMUSG00000025981	104.179	-2.15965	0.659507	-3.27465	0.00105793	0.0274809	Coq10b
ENSMUSG00000017493	259.305	-2.15447	0.658777	-3.2704	0.00107394	0.0275656	Igfbp4
ENSMUSG00000023800	101.051	2.47484	0.756585	3.27106	0.00107145	0.0275656	Tiam2
ENSMUSG00000024014	26.5179	-2.53097	0.773768	-3.27097	0.0010718	0.0275656	Pim1
ENSMUSG00000050989	79.0375	-2.89935	0.885998	-3.27241	0.00106636	0.0275656	Selenon
ENSMUSG00000046523	5.62878	3.83518	1.17517	3.26352	0.00110039	0.0281609	Kctd4
ENSMUSG00000083646	7.70159	-2.78365	0.85326	-3.26237	0.00110485	0.0281917	Gm6088
ENSMUSG00000039671	14.0806	2.32768	0.713773	3.26109	0.00110983	0.0282355	Zmynd8
ENSMUSG00000031584	54.782	-2.86822	0.880362	-3.258	0.001122	0.0284613	Gsr
ENSMUSG00000031610	72.0517	3.93016	1.20847	3.25217	0.00114528	0.0289668	Scrg1
ENSMUSG00000031880	70.74	3.39572	1.04458	3.25081	0.00115076	0.0290207	Rrad
ENSMUSG00000035572	7.53309	2.86998	0.883456	3.24858	0.00115983	0.0290797	Dcaf10
ENSMUSG00000040102	6.01455	3.82008	1.17575	3.24906	0.00115789	0.0290797	Klhl42
ENSMUSG00000106918	23.6719	-2.40259	0.740149	-3.24609	0.00117002	0.0292506	Mrpl33
ENSMUSG00000032525	167.528	-1.69825	0.523329	-3.2451	0.00117409	0.0292678	Nktr
ENSMUSG00000024830	7.53742	3.23242	0.99681	3.24276	0.00118376	0.029424	Rps6kb2
ENSMUSG00000025875	3.26632	3.59833	1.11267	3.23397	0.00122083	0.0302584	Tspan17
ENSMUSG00000025025	48.1742	-2.90022	0.897833	-3.23024	0.00123687	0.0305683	Mxi1
ENSMUSG00000044328	21.0107	2.57387	0.797451	3.22762	0.00124823	0.0306743	Trp53i13
ENSMUSG00000082810	0.442166	-1.8874	0.584767	-3.22762	0.00124825	0.0306743	Gm8682
ENSMUSG00000035297	36.1834	2.8538	0.885099	3.22427	0.00126293	0.0309472	Cops4
ENSMUSG00000050299	56.7103	-1.07035	0.332371	-3.22034	0.00128038	0.031286	Gm9843
ENSMUSG00000026095	4.40262	-3.53404	1.09808	-3.21838	0.00128915	0.0314117	Asnsd1
ENSMUSG00000043889	38.6724	-1.58156	0.491738	-3.21626	0.00129873	0.0315563	Gm8399
ENSMUSG00000094518	7.31757	-1.46484	0.456096	-3.21171	0.0013195	0.031971	Gm6421
ENSMUSG00000050891	2.52349	3.18993	0.994697	3.20694	0.00134157	0.0324149	Tatdn1
ENSMUSG00000024525	12.8217	3.2037	1.00027	3.20283	0.00136082	0.0327886	Impa2
ENSMUSG00000006699	167.314	-1.36436	0.4263	-3.20048	0.001372	0.0328969	Cdc42
ENSMUSG00000032743	3.18853	3.57832	1.11812	3.20028	0.00137292	0.0328969	D430042O09Rik
ENSMUSG00000008475	120.725	-1.78809	0.559141	-3.19792	0.00138422	0.0329847	Arpc5
ENSMUSG00000040302	4.62887	3.37072	1.05385	3.19848	0.00138156	0.0329847	Rbm48
ENSMUSG00000020817	21.3753	2.45377	0.767977	3.19511	0.00139776	0.0332159	Rabep1
ENSMUSG00000000600	50.3395	-2.48413	0.778097	-3.19257	0.00141011	0.0332356	Krit1
ENSMUSG00000035530	163.52	-1.35356	0.423919	-3.19298	0.00140815	0.0332356	Eif1
ENSMUSG00000070780	3.9306	-3.14447	0.98461	-3.19362	0.00140503	0.0332356	Rbm47
ENSMUSG00000024150	31.708	2.63477	0.826703	3.18708	0.00143715	0.0337808	Mcfd2
ENSMUSG00000104126	24.5778	-1.48401	0.466014	-3.18448	0.00145013	0.0339935	Gm37486
ENSMUSG00000028367	68.9381	-1.76531	0.554628	-3.18287	0.00145823	0.0340911	Txn1
ENSMUSG00000028680	84.8415	-3.78629	1.19338	-3.17275	0.00151002	0.0352066	Plk3
ENSMUSG00000009687	213.646	-2.21315	0.698207	-3.16976	0.00152564	0.0354753	Fxyd5
ENSMUSG00000024773	77.4301	-2.95089	0.932048	-3.16602	0.00154539	0.0358381	Atg2a
ENSMUSG00000026932	10.5913	3.02969	0.958874	3.15964	0.00157965	0.0365348	Nacc2
ENSMUSG00000019254	41.7747	-2.7211	0.862662	-3.1543	0.00160883	0.0371104	Ppp1r12c
ENSMUSG00000028626	493.932	2.96145	0.939293	3.15285	0.00161687	0.0371967	Col9a2
ENSMUSG00000022960	7.23341	-3.70089	1.17491	-3.14993	0.00163311	0.0372728	Donson
ENSMUSG00000063273	18.0952	-2.36481	0.750719	-3.15006	0.00163235	0.0372728	Naa15
ENSMUSG00000082431	3.44945	2.59901	0.824827	3.15097	0.00162727	0.0372728	Tdpx-ps1
ENSMUSG00000031972	0.408482	-2.19517	0.698036	-3.14478	0.00166211	0.0378348	Acta1
ENSMUSG00000059182	47.6368	-2.90823	0.925153	-3.14352	0.00166932	0.0378992	Skap2
ENSMUSG00000019768	33.3057	-2.81845	0.897524	-3.14025	0.00168805	0.0382242	Esr1
ENSMUSG00000020241	297.062	1.85475	0.591371	3.13636	0.00171061	0.0386339	Col6a2
ENSMUSG00000105452	5.93253	-1.58561	0.505747	-3.13519	0.00171742	0.0386866	Gm5276
ENSMUSG00000024048	148.974	-1.49351	0.476799	-3.13236	0.00173409	0.0389606	Myl12a
ENSMUSG00000073838	2.2478	3.32711	1.06365	3.12801	0.00175997	0.0394397	Tufm
ENSMUSG00000001119	319.711	1.71557	0.549813	3.12028	0.00180682	0.0401291	Col6a1
ENSMUSG00000025795	8.14555	-3.83745	1.23	-3.11987	0.00180929	0.0401291	Rassf3
ENSMUSG00000037406	2.74006	3.31249	1.06135	3.12101	0.0018023	0.0401291	Htra4
ENSMUSG00000060680	6.62634	-1.4357	0.459978	-3.12124	0.00180093	0.0401291	Gm8894
ENSMUSG00000019297	3.39162	3.52465	1.13408	3.10793	0.00188403	0.0413625	Nop9
ENSMUSG00000020183	8.52062	3.65979	1.17719	3.10891	0.00187781	0.0413625	Cpm
ENSMUSG00000024451	0.450891	-2.18935	0.704148	-3.10922	0.00187582	0.0413625	Arap3
ENSMUSG00000040018	1.60224	3.09461	0.995532	3.1085	0.00188038	0.0413625	Cox15
ENSMUSG00000021613	351.339	3.24943	1.04579	3.10715	0.00188901	0.0413669	Hapln1
ENSMUSG00000008763	13.522	2.15878	0.695093	3.10574	0.00189801	0.0414591	Man1a2
ENSMUSG00000062797	11.1212	3.14286	1.01259	3.10377	0.00191072	0.0416316	Hikeshi
ENSMUSG00000001128	13.5582	-3.95114	1.27395	-3.10147	0.0019256	0.0418505	Cfp
ENSMUSG00000020859	132.934	-1.50421	0.485562	-3.09787	0.00194919	0.0419416	Spag9
ENSMUSG00000026584	2.1566	2.48842	0.803144	3.09835	0.00194602	0.0419416	Scyl3
ENSMUSG00000031400	36.2222	-3.34973	1.08057	-3.09996	0.00193549	0.0419416	G6pdx
ENSMUSG00000080950	1.57089	-2.21922	0.71626	-3.09834	0.0019461	0.0419416	Gm7278
ENSMUSG00000022305	4.21428	3.4772	1.12469	3.09169	0.00199021	0.0426579	Lrp12
ENSMUSG00000082420	14.3309	-1.53333	0.496003	-3.09137	0.00199235	0.0426579	Gm6517
ENSMUSG00000020718	14.1012	3.61073	1.16862	3.08973	0.00200335	0.0427876	Polg2
ENSMUSG00000000594	80.1776	-2.1883	0.709188	-3.08564	0.00203114	0.0432744	Gm2a
ENSMUSG00000020029	77.4036	-1.86965	0.606475	-3.08281	0.00205054	0.0435802	Nudt4
ENSMUSG00000024782	25.5144	-2.69491	0.875478	-3.07822	0.00208241	0.0441492	Ak3
ENSMUSG00000059343	9.25683	-1.69127	0.549947	-3.07534	0.00210265	0.0444692	Aldoart1
ENSMUSG00000038648	91.5598	1.87665	0.610881	3.07203	0.00212606	0.0447454	Creb3l2
ENSMUSG00000042105	11.6356	-3.41014	1.10985	-3.07262	0.00212185	0.0447454	Inpp5f
ENSMUSG00000036552	1.59587	2.64828	0.862769	3.06951	0.0021441	0.0450157	Ermard
ENSMUSG00000016494	91.0808	-3.63816	1.18882	-3.06032	0.00221104	0.0461649	Cd34
ENSMUSG00000022037	1440.21	2.34448	0.766029	3.06056	0.00220926	0.0461649	Clu
ENSMUSG00000028538	3.55544	3.4446	1.12576	3.0598	0.00221485	0.0461649	St3gal3
ENSMUSG00000021027	59.7484	-1.88742	0.617371	-3.05719	0.00223422	0.0464567	Ralgapa1
ENSMUSG00000029916	6.95564	3.17625	1.03976	3.05479	0.00225217	0.0467177	Agk
ENSMUSG00000038705	2.47556	3.20269	1.04911	3.05277	0.00226738	0.0469206	Gmeb2
ENSMUSG00000018425	52.8308	-2.91352	0.954624	-3.05201	0.00227315	0.0469279	Dhx40
ENSMUSG00000037375	7.55636	3.05651	1.00172	3.05126	0.00227886	0.0469337	Hhat
ENSMUSG00000027254	7.17736	2.84802	0.934091	3.04897	0.00229626	0.0471797	Map1a
ENSMUSG00000035275	12.7788	-3.3345	1.09641	-3.0413	0.00235559	0.048284	Raver2
ENSMUSG00000061904	348.359	-1.42646	0.469168	-3.04041	0.00236252	0.0483117	Slc25a3
ENSMUSG00000034902	24.4506	-2.81687	0.926929	-3.03893	0.0023742	0.0484359	Pip5k1c
ENSMUSG00000020235	18.7934	3.26304	1.07418	3.03769	0.00238397	0.0485208	Fzr1
ENSMUSG00000028370	8.2693	2.6747	0.88091	3.03629	0.00239505	0.0486157	Pappa
ENSMUSG00000028766	262.891	2.79357	0.920243	3.03569	0.00239987	0.0486157	Alpl
ENSMUSG00000023367	68.1128	2.2371	0.737258	3.03435	0.00241055	0.048718	Tmem176a
ENSMUSG00000018821	10.0969	3.72507	1.22862	3.03191	0.0024301	0.0489887	Avpi1
ENSMUSG00000027091	16.629	2.3719	0.78302	3.02916	0.00245233	0.0489887	Zc3h15
ENSMUSG00000029135	162.896	-1.63941	0.541456	-3.02778	0.0024636	0.0489887	Fosl2
ENSMUSG00000030695	213.106	-1.53523	0.506656	-3.03013	0.00244452	0.0489887	Aldoa
ENSMUSG00000031453	74.5632	-2.18398	0.720838	-3.02977	0.00244737	0.0489887	Rasa3
ENSMUSG00000039682	12.4939	2.94339	0.971082	3.03104	0.00243715	0.0489887	Lap3
ENSMUSG00000097039	3.78386	3.34039	1.10323	3.02782	0.00246322	0.0489887	Pvt1
ENSMUSG00000035107	23.9307	-2.5117	0.829974	-3.02624	0.00247613	0.0491251	Dcbld2
ENSMUSG00000040128	200.227	-1.61429	0.534169	-3.02205	0.00251068	0.0496966	Pnrc1
ENSMUSG00000020766	25.2416	3.4273	1.13478	3.02024	0.00252577	0.049881	Galk1
ENSMUSG00000020733	68.3418	-4.49662	1.49375	-3.01029	0.00261003	0.0514276	Slc9a3r1
ENSMUSG00000020788	1.87435	-2.57218	0.85527	-3.00745	0.00263448	0.051674	Atp2a3
ENSMUSG00000049792	10.2312	3.40271	1.13139	3.00756	0.00263355	0.051674	Bag5
ENSMUSG00000022053	20.0201	-3.53103	1.1749	-3.00539	0.00265237	0.0519073	Ebf2
ENSMUSG00000104230	1.61401	-1.67531	0.557821	-3.00332	0.00267052	0.0521445	Gm37591
ENSMUSG00000060743	17.6769	-1.39718	0.465462	-3.0017	0.00268475	0.0523043	H3f3a
ENSMUSG00000058317	9.0982	-2.54487	0.848587	-2.99895	0.00270916	0.0526611	Ube2e2
ENSMUSG00000030671	9.02059	2.90281	0.96836	2.99765	0.0027207	0.0527669	Pde3b
ENSMUSG00000028530	118.469	-1.56298	0.522107	-2.99359	0.00275713	0.0533539	Jak1
ENSMUSG00000040690	72.3161	2.25169	0.752767	2.99121	0.00277872	0.0536517	Col16a1
ENSMUSG00000020658	2.90684	2.78986	0.934334	2.98593	0.00282717	0.0543496	Efr3b
ENSMUSG00000028101	11.5995	-3.40409	1.14006	-2.98589	0.00282754	0.0543496	Pias3
ENSMUSG00000031134	29.4491	-2.89366	0.969327	-2.98522	0.00283372	0.0543496	Rbmx
ENSMUSG00000017291	50.3896	-1.63493	0.547919	-2.98389	0.00284613	0.0544669	Taok1
ENSMUSG00000020097	24.8336	-2.22266	0.745516	-2.98137	0.00286958	0.0545535	Sgpl1
ENSMUSG00000028041	16.2836	2.6966	0.904414	2.9816	0.0028675	0.0545535	Adam15
ENSMUSG00000033016	109.992	1.87882	0.630055	2.98199	0.00286378	0.0545535	Nfatc1
ENSMUSG00000041889	31.9232	2.89302	0.970707	2.98032	0.00287948	0.0546218	Shisa4
ENSMUSG00000003153	21.9596	-3.03559	1.01961	-2.97721	0.00290887	0.0548186	Slc2a3
ENSMUSG00000037032	9.44019	3.87601	1.30168	2.9777	0.00290422	0.0548186	Apbb1
ENSMUSG00000038679	114.434	1.88347	0.632372	2.97842	0.00289741	0.0548186	Trps1
ENSMUSG00000028047	91.5031	2.24004	0.753173	2.97413	0.00293818	0.0552506	Thbs3
ENSMUSG00000074553	11.6962	-1.14852	0.38648	-2.97175	0.0029611	0.0555608	Eif1-ps1
ENSMUSG00000009907	55.2141	-2.50497	0.84338	-2.97015	0.0029765	0.0557288	Vps4b
ENSMUSG00000029752	7.55321	3.17343	1.06897	2.96867	0.0029909	0.0558094	Asns
ENSMUSG00000093384	2.77568	-3.02343	1.01854	-2.96838	0.00299371	0.0558094	Gm20689
ENSMUSG00000002550	8.58409	-2.91793	0.983564	-2.96669	0.00301022	0.0559965	Uck1
ENSMUSG00000083539	0.639682	-1.88327	0.635147	-2.96509	0.0030259	0.0561675	Gm12466
ENSMUSG00000054555	1.73264	3.15161	1.06351	2.96341	0.00304247	0.056354	Adam12
ENSMUSG00000022969	35.3442	-3.31846	1.1207	-2.96106	0.00306581	0.0566651	Il10rb
ENSMUSG00000031578	5.03932	2.71532	0.91748	2.95954	0.00308094	0.0568233	Mak16
ENSMUSG00000028214	167.957	-2.74176	0.926892	-2.95801	0.00309634	0.0568648	Gem
ENSMUSG00000042473	14.0599	2.73493	0.924487	2.95832	0.00309319	0.0568648	Tbc1d8b
ENSMUSG00000025873	22.9244	2.5111	0.849611	2.95559	0.00312071	0.05707	Faf2
ENSMUSG00000089999	5.07593	-1.38148	0.467411	-2.9556	0.00312066	0.05707	Gm6485
ENSMUSG00000063727	51.7363	2.90243	0.983276	2.95179	0.00315935	0.0576548	Tnfrsf11b
ENSMUSG00000001131	107.459	2.9649	1.00475	2.95087	0.00316877	0.057705	Timp1
ENSMUSG00000032470	11.3507	2.92237	0.991304	2.948	0.00319834	0.0581211	Mras
ENSMUSG00000023921	9.48948	3.12248	1.06098	2.94301	0.00325041	0.0589435	Mut
ENSMUSG00000026341	69.4082	-1.77519	0.603373	-2.94212	0.00325977	0.0589895	Actr3
ENSMUSG00000042793	2.61096	3.4902	1.18794	2.93804	0.00330298	0.0596468	Lgr6
ENSMUSG00000028496	6.77925	-3.31924	1.13113	-2.93444	0.0033415	0.0602165	Mllt3
ENSMUSG00000022074	6.2519	3.16516	1.07894	2.93357	0.00335084	0.0602593	Tnfrsf10b
ENSMUSG00000002608	9.8744	2.33972	0.799502	2.92647	0.00342834	0.0614021	Ccdc97
ENSMUSG00000030689	4.33883	3.25872	1.11354	2.92645	0.00342858	0.0614021	Ino80e
ENSMUSG00000020961	24.3981	-3.63986	1.24497	-2.92365	0.00345954	0.0615742	Ston2
ENSMUSG00000024170	8.30482	3.56027	1.21765	2.92388	0.00345696	0.0615742	Telo2
ENSMUSG00000028114	3.23272	2.93059	1.00234	2.92375	0.00345845	0.0615742	Mettl14
ENSMUSG00000003617	187.985	-2.24883	0.770218	-2.91973	0.00350336	0.0622259	Cp
ENSMUSG00000060032	16.7672	-2.13183	0.730461	-2.91847	0.00351751	0.0623493	H2afj
ENSMUSG00000043872	7.50697	-3.2123	1.10195	-2.9151	0.00355574	0.0628981	Zmym1
ENSMUSG00000087943	0.677003	-1.49864	0.514443	-2.91313	0.00357827	0.0631675	Gm24245
ENSMUSG00000037960	77.9776	-2.701	0.927774	-2.91126	0.00359969	0.0634162	Card19
ENSMUSG00000040152	1865.34	-1.94604	0.668604	-2.91061	0.00360727	0.0634205	Thbs1
ENSMUSG00000066278	37.0675	-2.82799	0.972073	-2.90924	0.00362313	0.0635701	Vps37b
ENSMUSG00000028066	3.83691	3.41782	1.17593	2.90649	0.00365513	0.0640017	Pmf1
ENSMUSG00000028995	12.2664	-2.98477	1.02733	-2.90536	0.00366826	0.0641019	Fam126a
ENSMUSG00000021493	69.9744	-2.00403	0.689943	-2.90463	0.00367693	0.0641238	Pdlim7
ENSMUSG00000057672	14.8523	-2.98201	1.02741	-2.90244	0.00370269	0.0644432	Pkn1
ENSMUSG00000092240	1.76581	-2.76781	0.955458	-2.89684	0.00376939	0.0654724	Gm4246
ENSMUSG00000036087	35.9862	-2.47145	0.853433	-2.89589	0.00378083	0.0655394	Slain2
ENSMUSG00000031849	2039.71	1.94271	0.671244	2.89419	0.00380142	0.0657645	Comp
ENSMUSG00000107028	2.50532	-2.97293	1.02854	-2.89044	0.00384699	0.0664201	Gm5043
ENSMUSG00000001569	2.78574	3.08753	1.06918	2.88776	0.00387992	0.0668551	Nom1
ENSMUSG00000038351	9.05596	3.06055	1.06235	2.88091	0.00396524	0.0681896	Sgsm2
ENSMUSG00000028194	7.0949	3.50267	1.2165	2.87931	0.00398544	0.0684009	Ddah1
ENSMUSG00000031529	17.0638	-2.31467	0.805389	-2.87397	0.00405345	0.0694303	Tnks
ENSMUSG00000027601	7.79656	2.8301	0.9859	2.87058	0.00409719	0.0700409	Mtfr1
ENSMUSG00000008604	21.2259	-3.10323	1.08203	-2.86796	0.00413123	0.0704835	Ubqln4
ENSMUSG00000020629	9.91545	3.20209	1.11723	2.8661	0.00415561	0.0707599	Adi1
ENSMUSG00000027833	13.4081	2.49368	0.870448	2.86482	0.00417246	0.0709072	Shox2
ENSMUSG00000001750	27.4582	-2.56648	0.896248	-2.86358	0.00418888	0.0710466	Tcirg1
ENSMUSG00000036833	29.2006	-3.10564	1.0857	-2.86049	0.00422992	0.0715406	Pnpla7
ENSMUSG00000048677	15.3697	-2.99264	1.04633	-2.86014	0.00423454	0.0715406	Tpcn2
ENSMUSG00000022665	247.335	1.87466	0.655788	2.85864	0.00425464	0.07174	Ccdc80
ENSMUSG00000002981	47.4842	2.10862	0.738391	2.8557	0.00429419	0.0722661	Clptm1
ENSMUSG00000041438	10.1034	3.12272	1.09419	2.8539	0.0043186	0.0725357	Utp4
ENSMUSG00000001441	22.8448	-2.06215	0.722886	-2.85267	0.00433538	0.0726765	Npepps
ENSMUSG00000048234	29.3537	-2.41667	0.847361	-2.852	0.00434454	0.0726891	Rnf149
ENSMUSG00000071177	38.2947	4.09745	1.43751	2.85037	0.00436681	0.0729207	Serpina1d
ENSMUSG00000057897	2.07992	2.4078	0.845172	2.84888	0.0043873	0.0729811	Camk2b
ENSMUSG00000066629	3.92117	-1.14807	0.402972	-2.84901	0.00438557	0.0729811	Rpl36-ps3
ENSMUSG00000026283	8.73775	-3.31589	1.16431	-2.84795	0.00440025	0.0730559	Ing5
ENSMUSG00000040174	10.6798	3.31967	1.16595	2.84717	0.00441097	0.0730937	Alkbh3
ENSMUSG00000029581	25.6727	2.62126	0.921327	2.84509	0.00443989	0.073314	Fscn1
ENSMUSG00000035129	3.58496	2.98999	1.05097	2.84499	0.00444122	0.073314	Gm6781
ENSMUSG00000034612	125.507	2.22996	0.784598	2.84217	0.0044807	0.0738248	Chst11
ENSMUSG00000032374	145.243	1.92298	0.677085	2.84009	0.00451009	0.0740271	Plod2
ENSMUSG00000103622	2.47463	2.77013	0.975344	2.84016	0.0045091	0.0740271	Gm38391
ENSMUSG00000005299	16.7581	2.61917	0.923718	2.83546	0.00457591	0.0748234	Letm1
ENSMUSG00000017446	6.75126	3.01404	1.06287	2.83576	0.00457174	0.0748234	C1qtnf1
ENSMUSG00000022025	1092.95	2.46517	0.870362	2.83235	0.00462068	0.075271	Cnmd
ENSMUSG00000038366	58.9603	-1.90434	0.672313	-2.83252	0.00461822	0.075271	Lasp1
ENSMUSG00000020190	64.2164	-1.77759	0.628198	-2.82966	0.00465974	0.0756224	Mknk2
ENSMUSG00000021838	24.513	2.0539	0.725808	2.82981	0.00465759	0.0756224	Samd4
ENSMUSG00000032431	103.779	1.61723	0.571887	2.82789	0.00468557	0.0758992	Crtap
ENSMUSG00000005161	55.2208	1.62457	0.574868	2.82598	0.00471361	0.0762107	Prdx2
ENSMUSG00000010025	2.86228	3.16404	1.12084	2.82292	0.00475886	0.0767988	Aldh3a2
ENSMUSG00000011877	18.1769	-3.05953	1.08584	-2.81766	0.00483755	0.0772282	Git1
ENSMUSG00000023010	53.3537	-1.41185	0.501322	-2.81625	0.00485877	0.0772282	Tmbim6
ENSMUSG00000024665	17.0696	2.58716	0.918807	2.81578	0.00486582	0.0772282	Fads2
ENSMUSG00000026042	157.437	1.99354	0.707751	2.81673	0.00485158	0.0772282	Col5a2
ENSMUSG00000030138	6.41961	3.17806	1.12814	2.81707	0.00484635	0.0772282	Bms1
ENSMUSG00000035781	59.2419	-2.2514	0.798894	-2.81815	0.0048301	0.0772282	R3hdm4
ENSMUSG00000042599	38.9002	-1.95763	0.695115	-2.81627	0.00485841	0.0772282	Kdm7a
ENSMUSG00000049686	4.14891	2.9629	1.0509	2.8194	0.0048114	0.0772282	Orai1
ENSMUSG00000058444	12.6994	-3.09414	1.09795	-2.81812	0.00483061	0.0772282	Map2k5
ENSMUSG00000004085	15.5633	-3.04006	1.08157	-2.81078	0.00494222	0.078297	Map3k20
ENSMUSG00000025223	33.9321	-1.78839	0.637203	-2.80662	0.0050064	0.0785942	Ldb1
ENSMUSG00000026258	118.135	3.10839	1.10726	2.80729	0.00499601	0.0785942	3110079O15Rik
ENSMUSG00000029781	199.651	1.58006	0.56283	2.80734	0.00499526	0.0785942	Fkbp9
ENSMUSG00000034656	5.56215	-3.32309	1.18354	-2.80775	0.00498895	0.0785942	Cacna1a
ENSMUSG00000082791	3.27375	-2.38936	0.851247	-2.80689	0.00500216	0.0785942	Gm4875
ENSMUSG00000025872	12.2227	2.96846	1.05876	2.80373	0.00505155	0.0787314	Thoc3
ENSMUSG00000031328	402.583	-1.44437	0.515141	-2.80384	0.00504977	0.0787314	Flna
ENSMUSG00000031805	4.54143	3.07051	1.09464	2.80505	0.00503083	0.0787314	Jak3
ENSMUSG00000053716	8.82528	2.73646	0.975797	2.80434	0.00504201	0.0787314	Dusp7
ENSMUSG00000073982	48.7364	-2.33822	0.835001	-2.80027	0.00510607	0.0794379	Rhog
ENSMUSG00000027660	152.808	-1.55317	0.554799	-2.79952	0.00511789	0.079479	Skil
ENSMUSG00000024952	17.9832	2.68799	0.960484	2.79858	0.0051328	0.0795676	Rps6ka4
ENSMUSG00000051000	4.30151	3.15547	1.1283	2.79666	0.00516335	0.079898	Fam160a1
ENSMUSG00000021361	35.1702	-2.37778	0.850854	-2.79458	0.00519678	0.0802717	Tmem14c
ENSMUSG00000017999	14.4246	2.63809	0.944766	2.79233	0.00523307	0.0806882	Ddx27
ENSMUSG00000001998	10.9661	-3.38411	1.21302	-2.78983	0.00527363	0.0809685	Ap4e1
ENSMUSG00000024259	4.75676	2.65559	0.951795	2.79009	0.00526936	0.0809685	Slc25a46
ENSMUSG00000025823	41.9751	1.86627	0.669451	2.78776	0.00530741	0.0809685	Pdia4
ENSMUSG00000038489	4.90689	2.04935	0.734707	2.78934	0.00528158	0.0809685	Polr2l
ENSMUSG00000047139	118.92	-2.98653	1.07107	-2.78836	0.00529758	0.0809685	Cd24a
ENSMUSG00000063897	11.9016	-2.49118	0.893553	-2.78795	0.00530425	0.0809685	CAAA01118383.1
ENSMUSG00000035236	5.07002	2.53825	0.910721	2.78707	0.00531863	0.0809967	Scai
ENSMUSG00000026074	53.0994	-1.79808	0.646305	-2.78209	0.00540103	0.0812664	Map4k4
ENSMUSG00000026478	88.648	-2.20151	0.79161	-2.78105	0.00541833	0.0812664	Lamc1
ENSMUSG00000026577	3.37718	3.28827	1.18181	2.78241	0.00539576	0.0812664	Blzf1
ENSMUSG00000033021	18.9916	2.40641	0.865178	2.78141	0.00541241	0.0812664	Gmppa
ENSMUSG00000034168	18.7329	2.31817	0.833606	2.7809	0.00542089	0.0812664	Irf2bpl
ENSMUSG00000037773	4.81062	2.88491	1.03598	2.78471	0.00535754	0.0812664	Pced1a
ENSMUSG00000041236	41.0071	-2.35831	0.847589	-2.78238	0.00539626	0.0812664	Vps41
ENSMUSG00000065954	76.1917	-1.83138	0.658378	-2.78165	0.0054083	0.0812664	Tacc1
ENSMUSG00000107092	5.71043	-1.85088	0.66469	-2.78457	0.00535988	0.0812664	Gm7993
ENSMUSG00000038518	28.8942	-2.35938	0.849305	-2.77802	0.0054692	0.0818136	Jarid2
ENSMUSG00000067586	3.90583	3.01346	1.08492	2.77759	0.00547631	0.0818136	S1pr3
ENSMUSG00000020677	7.26395	3.28968	1.18547	2.775	0.00552021	0.082052	Ddx52
ENSMUSG00000022836	23.3727	2.50089	0.901635	2.77373	0.00554173	0.082052	Mylk
ENSMUSG00000024423	52.6639	-2.10422	0.758136	-2.77552	0.00551134	0.082052	Impact
ENSMUSG00000047907	8.69344	-2.59213	0.934199	-2.77471	0.00552507	0.082052	Tshz2
ENSMUSG00000059412	86.5056	3.97159	1.43236	2.77276	0.00555829	0.082052	Fxyd2
ENSMUSG00000073867	128.435	-0.911105	0.328594	-2.77274	0.00555867	0.082052	AA474408
ENSMUSG00000082360	1.00037	-1.70862	0.616111	-2.77324	0.00555011	0.082052	Gm8814
ENSMUSG00000025340	92.1539	-2.4386	0.88033	-2.7701	0.00560392	0.0825791	Rabgef1
ENSMUSG00000057230	17.4946	2.3902	0.863205	2.76898	0.00562316	0.0827216	Aak1
ENSMUSG00000020181	4.98608	3.27567	1.18479	2.76478	0.00569615	0.0836532	Nav3
ENSMUSG00000062846	3.07466	-1.83007	0.663098	-2.75988	0.00578219	0.0847728	Gm14176
ENSMUSG00000040356	10.265	2.39732	0.869057	2.75853	0.00580612	0.0848361	Skiv2l
ENSMUSG00000046733	9.31132	3.6599	1.32669	2.75868	0.00580361	0.0848361	Gprc5a
ENSMUSG00000018196	7.4954	-2.60656	0.94629	-2.75451	0.00587808	0.0852527	Glrx2
ENSMUSG00000032175	3.36592	2.69833	0.979885	2.75373	0.00589212	0.0852527	Tyk2
ENSMUSG00000032515	75.9268	-2.00269	0.726632	-2.75613	0.00584905	0.0852527	Csrnp1
ENSMUSG00000034488	36.2401	2.56319	0.930476	2.75471	0.00587448	0.0852527	Edil3
ENSMUSG00000036078	7.63933	2.79757	1.01596	2.75363	0.00589377	0.0852527	Sigmar1
ENSMUSG00000101685	2.25705	-1.75377	0.63666	-2.75464	0.00587559	0.0852527	Gm17837
ENSMUSG00000036591	46.1476	-1.87991	0.682956	-2.75261	0.00591228	0.0853777	Arhgap21
ENSMUSG00000040274	47.7422	2.61026	0.948723	2.75134	0.00593529	0.085567	Cdk6
ENSMUSG00000022771	24.8442	-2.40541	0.874463	-2.75073	0.00594633	0.0855836	Ppil2
ENSMUSG00000036908	24.3578	-3.21918	1.17095	-2.74921	0.005974	0.085839	Unc93b1
ENSMUSG00000019726	79.2707	-2.62171	0.953844	-2.74857	0.00598554	0.0858623	Lyst
ENSMUSG00000022263	46.3059	1.8482	0.673601	2.74376	0.00607404	0.0868437	Trio
ENSMUSG00000049659	15.8677	-3.12041	1.13724	-2.74386	0.00607223	0.0868437	Aftph
ENSMUSG00000081251	1.28903	-1.64618	0.600179	-2.74282	0.00609141	0.0869484	Gm12164
ENSMUSG00000053110	23.9496	2.03664	0.742974	2.7412	0.00612149	0.0872338	Yap1
ENSMUSG00000024664	34.9342	-2.34828	0.857549	-2.73837	0.00617448	0.0878442	Fads3
ENSMUSG00000033416	3.78254	-3.24071	1.1838	-2.73755	0.00618986	0.0879183	Gucd1
ENSMUSG00000009894	14.2997	2.72918	0.997287	2.73661	0.00620762	0.0880261	Snap47
ENSMUSG00000033159	33.5118	-2.5105	0.917789	-2.73537	0.00623095	0.0880682	Cnppd1
ENSMUSG00000046993	54.0426	-1.47281	0.53833	-2.73589	0.00622114	0.0880682	Gm5637
ENSMUSG00000009406	2.1353	2.78913	1.02045	2.73325	0.00627132	0.0882368	Elk1
ENSMUSG00000018899	313.964	-2.13997	0.782883	-2.73345	0.00626756	0.0882368	Irf1
ENSMUSG00000020697	4.27898	3.08517	1.12902	2.7326	0.00628368	0.0882368	Lig3
ENSMUSG00000062981	6.70053	2.52878	0.925371	2.73272	0.00628135	0.0882368	Mrpl42
ENSMUSG00000021281	23.6415	-2.54103	0.930984	-2.7294	0.00634501	0.0888096	Tnfaip2
ENSMUSG00000078134	1.28675	-1.63274	0.598183	-2.72949	0.00634315	0.0888096	Gm12355
ENSMUSG00000005447	9.21181	3.00847	1.10274	2.72818	0.00636848	0.0889729	Pafah1b3
ENSMUSG00000040195	2.17936	2.58914	0.949194	2.72773	0.00637725	0.0889729	Nemp1
ENSMUSG00000038502	75.5526	1.71962	0.631066	2.72494	0.00643136	0.0895833	Ptov1
ENSMUSG00000016559	438.581	-1.1293	0.414806	-2.72249	0.00647923	0.0898162	H3f3b
ENSMUSG00000021987	13.025	-2.60127	0.955442	-2.72258	0.0064774	0.0898162	Mtmr6
ENSMUSG00000081239	0.907382	-1.94069	0.712656	-2.72318	0.00646561	0.0898162	Gm11836
ENSMUSG00000022210	1.83944	3.52406	1.29488	2.72154	0.00649793	0.0899313	Dhrs4
ENSMUSG00000024978	3.41607	3.10056	1.13993	2.71995	0.00652914	0.0902189	Gpam
ENSMUSG00000025171	12.4373	2.52231	0.928003	2.718	0.00656784	0.090609	Ubtd1
ENSMUSG00000029231	154.059	-2.37039	0.873044	-2.71509	0.00662576	0.0911174	Pdgfra
ENSMUSG00000030257	11.6265	2.85308	1.05076	2.71524	0.00662276	0.0911174	Srgap3
ENSMUSG00000074405	2.38512	2.7787	1.02581	2.70878	0.00675304	0.0927203	Zfp865
ENSMUSG00000039617	3.52082	2.71861	1.00408	2.70757	0.00677778	0.0929124	Gm7488
ENSMUSG00000015112	4.67039	3.13235	1.15899	2.70265	0.00687886	0.0940003	Slc25a13
ENSMUSG00000061306	64.3439	1.81913	0.67303	2.7029	0.00687367	0.0940003	Slc38a10
ENSMUSG00000031802	12.5698	2.98084	1.10411	2.69978	0.00693855	0.0945172	Phxr4
ENSMUSG00000035671	80.7241	-2.09311	0.775246	-2.69994	0.00693526	0.0945172	Zswim4
ENSMUSG00000020262	56.1818	-1.97657	0.733359	-2.69523	0.00703399	0.0955019	Adarb1
ENSMUSG00000034853	2.97136	3.10667	1.15283	2.69483	0.00704253	0.0955019	Acot11
ENSMUSG00000036452	30.1362	-2.93952	1.09091	-2.69456	0.00704812	0.0955019	Arhgap26
ENSMUSG00000062825	8.97112	-1.52382	0.565585	-2.69424	0.007055	0.0955019	Actg1
ENSMUSG00000030872	18.7997	2.34497	0.870554	2.69365	0.00706748	0.0955213	Gga2
ENSMUSG00000051343	18.3402	2.35919	0.877394	2.68886	0.00716969	0.0967517	Rab11fip5
ENSMUSG00000004473	107.875	2.33965	0.870573	2.68748	0.00719939	0.0970011	Clec11a
ENSMUSG00000033373	6.25475	-2.88212	1.07295	-2.68617	0.00722756	0.0972292	Fntb
ENSMUSG00000024780	16.1196	2.23435	0.832584	2.68364	0.00728264	0.097818	Cdc37l1
ENSMUSG00000037486	5.37714	-2.59049	0.966236	-2.68101	0.00734009	0.0984368	Asxl2
ENSMUSG00000025492	144.852	-2.08781	0.780409	-2.67528	0.00746666	0.0999146	Ifitm3
ENSMUSG00000066979	19.8487	2.46854	0.922824	2.67498	0.00747338	0.0999146	Bub3
ENSMUSG00000002578	10.6501	3.16674	1.18541	2.67144	0.00755275	0.100665	Ikzf4
ENSMUSG00000024087	11.2642	-2.65127	0.992439	-2.67147	0.00755209	0.100665	Cyp1b1
ENSMUSG00000000346	96.6568	-1.69987	0.63672	-2.66973	0.00759112	0.10102	Dazap2
ENSMUSG00000022203	18.5648	2.7017	1.01308	2.66681	0.00765744	0.101435	Efs
ENSMUSG00000034908	130.528	-1.54826	0.58053	-2.66698	0.00765362	0.101435	Sidt2
ENSMUSG00000073647	4.77339	-1.79098	0.671512	-2.66708	0.00765135	0.101435	Gm10557
ENSMUSG00000018669	7.11272	2.85041	1.06925	2.66582	0.00768019	0.101518	Cdk5rap3
ENSMUSG00000044792	23.1616	-2.1953	0.823596	-2.66551	0.00768719	0.101518	Isca1
ENSMUSG00000027087	37.8924	1.5914	0.598562	2.65871	0.00784411	0.103432	Itgav
ENSMUSG00000062210	20.9592	-3.35885	1.26368	-2.65799	0.00786075	0.103494	Tnfaip8
ENSMUSG00000022840	2.57585	-2.63667	0.992834	-2.6557	0.0079144	0.103786	Adcy5
ENSMUSG00000024858	36.7252	-2.45592	0.924839	-2.65551	0.0079189	0.103786	Grk2
ENSMUSG00000050974	1.00283	2.07896	0.782671	2.65624	0.00790184	0.103786	Gm9847
ENSMUSG00000022967	49.4598	-2.25368	0.849035	-2.6544	0.00794488	0.103818	Ifnar1
ENSMUSG00000042729	4.28123	3.05038	1.14941	2.65387	0.00795737	0.103818	Wdr74
ENSMUSG00000082491	3.4691	2.32608	0.876327	2.65435	0.00794616	0.103818	Gm5909
ENSMUSG00000030060	11.8796	-2.8477	1.07335	-2.6531	0.00797562	0.103899	Hmces
ENSMUSG00000040928	9.32267	-2.85274	1.07567	-2.65205	0.00800055	0.104067	S100pbp
ENSMUSG00000055447	163.297	-1.44614	0.545613	-2.65049	0.00803741	0.10439	Cd47
ENSMUSG00000040560	19.0091	2.44747	0.924443	2.6475	0.00810884	0.10516	Wdr7
ENSMUSG00000017774	65.9529	-1.7047	0.644309	-2.64577	0.00815043	0.105541	Myo1c
ENSMUSG00000002983	46.9907	-2.07833	0.786454	-2.64265	0.00822588	0.106359	Relb
ENSMUSG00000019539	211.375	1.30889	0.495466	2.64172	0.0082485	0.106377	Rcn3
ENSMUSG00000028552	15.3061	-2.55502	0.967231	-2.64159	0.0082519	0.106377	Eps15
ENSMUSG00000061838	2.81234	2.74092	1.03859	2.63907	0.00831347	0.107006	Suclg2
ENSMUSG00000107201	0.410495	-1.84252	0.6983	-2.63858	0.00832545	0.107006	5930420M18Rik
ENSMUSG00000015647	1.04218	2.42022	0.918321	2.63548	0.00840183	0.107828	Lama5
ENSMUSG00000020592	22.653	2.92052	1.10925	2.63288	0.00846631	0.108165	Sdc1
ENSMUSG00000024725	49.5018	-1.95533	0.74279	-2.63241	0.00847817	0.108165	Ostf1
ENSMUSG00000039001	14.8761	-1.07717	0.40903	-2.63347	0.00845183	0.108165	Rps21
ENSMUSG00000041057	21.4833	2.25496	0.856357	2.6332	0.00845851	0.108165	Wdr43
ENSMUSG00000014444	80.3611	1.76329	0.670762	2.62878	0.00856907	0.108425	Piezo1
ENSMUSG00000016528	82.6088	-1.84465	0.701963	-2.62784	0.00859297	0.108425	Mapkapk2
ENSMUSG00000020101	90.7778	-2.92423	1.11377	-2.62552	0.00865178	0.108425	Vsir
ENSMUSG00000022378	11.4867	-2.85602	1.08644	-2.62879	0.00856903	0.108425	Fam49b
ENSMUSG00000027134	5.12162	-1.96608	0.748755	-2.6258	0.00864452	0.108425	Lpcat4
ENSMUSG00000029622	186.647	-1.37555	0.523733	-2.62644	0.00862841	0.108425	Arpc1b
ENSMUSG00000030598	1.81211	2.97589	1.13133	2.63044	0.00852734	0.108425	Fbxo17
ENSMUSG00000034263	6.65112	3.08312	1.17304	2.62833	0.00858063	0.108425	Ints14
ENSMUSG00000041797	58.9687	-2.7038	1.02962	-2.62602	0.00863896	0.108425	Abca9
ENSMUSG00000050244	6.40191	2.99102	1.13954	2.62476	0.00867097	0.108425	Heatr1
ENSMUSG00000068250	5.08028	3.36979	1.28367	2.62512	0.00866184	0.108425	Amn1
ENSMUSG00000083895	0.992121	-1.79712	0.683339	-2.62991	0.00854062	0.108425	Gm12074
ENSMUSG00000090628	14.7934	-3.17565	1.20963	-2.62532	0.00865681	0.108425	Gm17083
ENSMUSG00000091020	1.36491	-2.45539	0.935513	-2.62464	0.00867402	0.108425	Gm5828
ENSMUSG00000038256	2.48112	2.98839	1.13915	2.62335	0.00870697	0.108523	Bcl9
ENSMUSG00000078151	2.21294	-2.24684	0.856321	-2.62382	0.00869488	0.108523	Gm12226
ENSMUSG00000024070	55.6372	-1.95488	0.745567	-2.622	0.00874153	0.108752	Prkd3
ENSMUSG00000029775	16.0222	2.27507	0.867799	2.62165	0.00875043	0.108752	Klhdc10
ENSMUSG00000024561	9.39553	-2.74845	1.04878	-2.62061	0.00877714	0.108927	Mbd1
ENSMUSG00000026585	7.50213	2.63943	1.00851	2.61717	0.00886628	0.10977	Kifap3
ENSMUSG00000051627	5.14878	2.44093	0.932719	2.61701	0.00887042	0.10977	Hist1h1e
ENSMUSG00000023008	29.5404	-1.88975	0.722512	-2.61553	0.00890893	0.110089	Fmnl3
ENSMUSG00000006058	17.2333	-2.3739	0.908101	-2.61413	0.0089454	0.110382	Snf8
ENSMUSG00000044030	10.8589	3.01811	1.15517	2.6127	0.00898291	0.110687	Irf2bp1
ENSMUSG00000081295	4.81799	-1.99494	0.764221	-2.61043	0.00904297	0.111268	Gm6275
ENSMUSG00000078484	18.7846	-3.02348	1.15846	-2.60991	0.0090566	0.111278	Klhl17
ENSMUSG00000024766	1.93781	2.87249	1.10094	2.60912	0.00907745	0.111281	Lipo3
ENSMUSG00000040322	10.0867	-2.59775	0.995714	-2.60893	0.00908257	0.111281	Slc25a24
ENSMUSG00000022285	75.4253	-1.19792	0.459516	-2.60691	0.00913626	0.111622	Ywhaz
ENSMUSG00000024143	42.7631	-1.89887	0.728367	-2.60702	0.00913341	0.111622	Rhoq
ENSMUSG00000059447	9.32446	-2.1626	0.829906	-2.60584	0.00916485	0.111814	Hadhb
ENSMUSG00000037408	35.7345	1.5988	0.615085	2.59932	0.00934087	0.113801	Cnnm4
ENSMUSG00000015733	104.751	-1.47279	0.566884	-2.59805	0.00937559	0.114063	Capza2
ENSMUSG00000000631	28.3581	1.60946	0.620245	2.59488	0.00946235	0.114083	Myo18a
ENSMUSG00000018209	9.86827	-2.88303	1.11152	-2.59378	0.00949283	0.114083	Stk4
ENSMUSG00000019823	37.7644	-2.62722	1.0131	-2.59324	0.00950756	0.114083	Mical1
ENSMUSG00000022108	747.512	-0.97326	0.375383	-2.59271	0.00952233	0.114083	Itm2b
ENSMUSG00000024290	52.0819	-1.45832	0.561639	-2.59654	0.00941687	0.114083	Rock1
ENSMUSG00000030536	169.698	-1.38734	0.534354	-2.59629	0.00942362	0.114083	Iqgap1
ENSMUSG00000033335	52.1878	-1.63005	0.627986	-2.59568	0.00944033	0.114083	Dnm2
ENSMUSG00000033392	23.4614	1.72373	0.664782	2.59293	0.00951612	0.114083	Clasp2
ENSMUSG00000040385	177.712	-1.56112	0.601154	-2.59688	0.00940759	0.114083	Ppp1ca
ENSMUSG00000070972	6.62558	2.30236	0.887637	2.59381	0.0094919	0.114083	Dnajc25
ENSMUSG00000081895	0.400759	-1.37519	0.529915	-2.59511	0.00945599	0.114083	Rpl17-ps10
ENSMUSG00000036916	11.6605	3.17996	1.22894	2.58756	0.00966579	0.115642	Zfp280c
ENSMUSG00000054252	101.737	2.18759	0.846135	2.58539	0.0097269	0.116212	Fgfr3
ENSMUSG00000022064	5.65915	2.34961	0.909401	2.5837	0.00977478	0.116623	Pibf1
ENSMUSG00000019986	7.23326	2.70824	1.04886	2.58208	0.00982056	0.116847	Ahi1
ENSMUSG00000022299	2.80231	2.36421	0.915572	2.58223	0.0098165	0.116847	Slc25a32
ENSMUSG00000016503	1.92459	2.76904	1.07304	2.58055	0.00986436	0.117207	Gtf3a
ENSMUSG00000027397	108.978	1.85857	0.721947	2.57438	0.0100419	0.11899	Slc20a1
ENSMUSG00000036596	3.04538	-2.55595	0.9928	-2.57449	0.0100388	0.11899	Cpz
ENSMUSG00000010830	73.3994	2.30268	0.894834	2.5733	0.0100733	0.11912	Kdelr3
ENSMUSG00000017009	274.585	1.59469	0.619877	2.57259	0.0100942	0.11912	Sdc4
ENSMUSG00000090150	4.00175	2.69383	1.04709	2.57267	0.0100917	0.11912	Acad11
ENSMUSG00000020218	231.19	2.39124	0.929953	2.57136	0.01013	0.119379	Wif1
ENSMUSG00000085622	3.49765	2.86718	1.11536	2.57064	0.0101512	0.119467	3110056K07Rik
ENSMUSG00000083183	0.811533	-1.73435	0.674892	-2.56982	0.0101751	0.119585	Gm15575
ENSMUSG00000095588	4.63469	-1.22706	0.477884	-2.56769	0.010238	0.120161	Gm12350
ENSMUSG00000096887	1.42592	-1.08528	0.423047	-2.56538	0.0103062	0.120634	Gm20594
ENSMUSG00000102844	3.28703	2.51819	0.981536	2.56556	0.0103008	0.120634	Gm38034
ENSMUSG00000106386	2.00447	2.85213	1.1121	2.56463	0.0103287	0.120734	Gm42991
ENSMUSG00000002885	36.7538	-3.10383	1.21158	-2.56181	0.0104129	0.121421	Adgre5
ENSMUSG00000032411	31.9239	-2.37715	0.92795	-2.56172	0.0104156	0.121421	Tfdp2
ENSMUSG00000022905	16.9814	-2.21812	0.867495	-2.55693	0.0105601	0.122572	Kpna1
ENSMUSG00000032562	222.289	-1.19015	0.465301	-2.55781	0.0105334	0.122572	Gnai2
ENSMUSG00000037958	29.7885	-2.71105	1.06043	-2.55657	0.010571	0.122572	Nsrp1
ENSMUSG00000103847	3.73373	-1.94146	0.759258	-2.55705	0.0105563	0.122572	Gm20056
ENSMUSG00000040479	9.2788	-2.52342	0.987776	-2.55465	0.0106295	0.123086	Dgkz
ENSMUSG00000006333	94.933	-0.853102	0.334078	-2.5536	0.0106615	0.123291	Rps9
ENSMUSG00000013833	41.1382	-2.36626	0.928538	-2.54837	0.0108227	0.124952	Med16
ENSMUSG00000033396	20.2118	2.41212	0.946841	2.54754	0.0108484	0.124952	Spg11
ENSMUSG00000048701	14.0804	-2.03556	0.799026	-2.54756	0.010848	0.124952	Ccdc6
ENSMUSG00000033685	60.1988	-3.70983	1.45662	-2.54687	0.0108693	0.125026	Ucp2
ENSMUSG00000034187	10.8373	-2.50887	0.985416	-2.546	0.0108964	0.125172	Nsf
ENSMUSG00000044098	15.1952	2.47507	0.972526	2.54499	0.010928	0.125368	Rsbn1
ENSMUSG00000106049	8.96008	-3.20497	1.2604	-2.54282	0.0109963	0.125984	Gm43019
ENSMUSG00000005981	17.5753	-2.8023	1.10303	-2.54056	0.0110674	0.126631	Trap1
ENSMUSG00000023055	22.7733	2.40032	0.945229	2.53941	0.011104	0.126882	Calcoco1
ENSMUSG00000038812	1.04949	2.27261	0.895734	2.53714	0.0111761	0.127537	Trmt112
ENSMUSG00000020893	103.766	-1.50732	0.594219	-2.53664	0.0111924	0.127554	Per1
ENSMUSG00000018449	10.9375	3.0164	1.1898	2.53522	0.0112377	0.127902	Rpain
ENSMUSG00000022361	21.5585	-2.40738	0.951032	-2.53133	0.011363	0.128989	Zhx1
ENSMUSG00000027878	168.808	-1.28293	0.506727	-2.53179	0.0113481	0.128989	Notch2
ENSMUSG00000075254	74.0516	-2.31546	0.915192	-2.53003	0.0114053	0.129299	Heg1
ENSMUSG00000025958	16.1867	-1.36199	0.539024	-2.52677	0.0115116	0.130334	Creb1
ENSMUSG00000023224	537.487	-1.80845	0.716008	-2.52573	0.0115457	0.130549	Serping1
ENSMUSG00000000325	1.62491	2.5844	1.0236	2.5248	0.0115763	0.130724	Arvcf
ENSMUSG00000036356	18.3091	2.4506	0.972276	2.52047	0.0117197	0.132073	Csgalnact1
ENSMUSG00000051412	8.10193	2.65336	1.05281	2.52028	0.0117263	0.132073	Vamp7
ENSMUSG00000027829	158.946	-1.27964	0.508013	-2.51892	0.0117716	0.132411	Ccnl1
ENSMUSG00000021806	39.0633	2.35621	0.93784	2.51238	0.011992	0.134716	Nid2
ENSMUSG00000027854	7.86662	2.26327	0.902401	2.50805	0.0121399	0.136072	Sike1
ENSMUSG00000029306	263.155	1.87659	0.748262	2.50793	0.0121442	0.136072	Ibsp
ENSMUSG00000063889	28.6774	-2.41543	0.964367	-2.50468	0.0122564	0.137151	Crem
ENSMUSG00000006442	31.1039	2.18907	0.874268	2.50389	0.0122838	0.13728	Srm
ENSMUSG00000050222	22.2507	2.57947	1.03134	2.50108	0.0123815	0.138015	Il17d
ENSMUSG00000066357	19.8589	2.50037	0.99959	2.5014	0.0123703	0.138015	Wdr6
ENSMUSG00000021666	13.506	-2.69806	1.0792	-2.50006	0.0124172	0.138236	Gfm2
ENSMUSG00000020571	102.063	1.65342	0.661679	2.49882	0.0124607	0.138541	Pdia6
ENSMUSG00000025816	12.102	2.6526	1.06263	2.49626	0.0125509	0.138831	Sec61a2
ENSMUSG00000031256	4.10376	2.66176	1.06619	2.49651	0.0125421	0.138831	Cstf2
ENSMUSG00000082319	25.2974	-1.76946	0.708774	-2.49651	0.0125423	0.138831	Gm8822
ENSMUSG00000094257	1.48914	-1.89184	0.757632	-2.49704	0.0125233	0.138831	Ap3s1-ps2
ENSMUSG00000056429	113.083	-1.56742	0.628095	-2.49551	0.0125776	0.138948	Tgoln1
ENSMUSG00000030987	31.1318	-2.53255	1.01539	-2.49415	0.0126258	0.139303	Stim1
ENSMUSG00000001436	11.0796	2.66544	1.06905	2.49329	0.0126565	0.139463	Slc19a1
ENSMUSG00000019929	4745.24	-1.58455	0.635761	-2.49237	0.0126893	0.139647	Dcn
ENSMUSG00000041408	44.3296	-1.99411	0.800398	-2.4914	0.0127242	0.139853	Wapl
ENSMUSG00000027656	41.0763	-2.60893	1.04763	-2.49031	0.0127632	0.139975	Wisp2
ENSMUSG00000036241	26.9226	-1.86196	0.74772	-2.49019	0.0127676	0.139975	Ube2r2
ENSMUSG00000070436	437.782	1.35548	0.544741	2.4883	0.0128355	0.140541	Serpinh1
ENSMUSG00000051855	15.4681	3.04268	1.22521	2.48339	0.0130138	0.142313	Mest
ENSMUSG00000004221	11.8402	-3.22089	1.29914	-2.47925	0.0131659	0.143432	Ikbkg
ENSMUSG00000030403	33.0714	-2.20272	0.88824	-2.47987	0.0131431	0.143432	Vasp
ENSMUSG00000081712	1.21954	1.97521	0.796655	2.47937	0.0131613	0.143432	Gm12096
ENSMUSG00000004880	23.6317	-1.72832	0.697829	-2.47672	0.0132597	0.144273	Lbr
ENSMUSG00000015971	8.27671	-2.67335	1.07978	-2.47583	0.0132926	0.144448	Actr8
ENSMUSG00000020152	32.9266	-1.45516	0.588322	-2.47341	0.013383	0.145066	Actr2
ENSMUSG00000081152	1.52182	-2.21843	0.896909	-2.47341	0.013383	0.145066	Gm12430
ENSMUSG00000063146	4.51626	-2.33636	0.945061	-2.47218	0.0134292	0.145261	Clip2
ENSMUSG00000068200	1.49613	-1.63915	0.663076	-2.47204	0.0134345	0.145261	Gm5931
ENSMUSG00000041488	1.70367	2.43361	0.98511	2.47039	0.0134965	0.145749	Stx3
ENSMUSG00000024283	25.4708	-1.5001	0.607813	-2.46804	0.0135857	0.146529	Wac
ENSMUSG00000014767	3.71547	2.88679	1.17054	2.46621	0.0136552	0.146729	Tbp
ENSMUSG00000020612	127.096	-1.33204	0.539995	-2.46677	0.0136339	0.146729	Prkar1a
ENSMUSG00000031239	111.907	1.93767	0.785612	2.46644	0.0136463	0.146729	Itm2a
ENSMUSG00000010095	194.871	-1.5334	0.622444	-2.46352	0.0137579	0.147467	Slc3a2
ENSMUSG00000057605	0.567784	-1.67812	0.681166	-2.4636	0.0137551	0.147467	Gm6807
ENSMUSG00000041308	26.9848	-1.95868	0.795686	-2.46163	0.0138308	0.148065	Sntb2
ENSMUSG00000027394	7.39089	2.84257	1.15521	2.46066	0.0138682	0.148281	Ttl
ENSMUSG00000026313	42.1471	-1.80504	0.733909	-2.45949	0.0139135	0.148583	Hdac4
ENSMUSG00000031536	8.72171	2.37731	0.967173	2.458	0.0139713	0.149016	Polb
ENSMUSG00000032475	13.3022	-2.44958	0.997164	-2.45655	0.014028	0.149436	Nck1
ENSMUSG00000014177	16.9219	2.4409	0.994583	2.45419	0.0141202	0.149496	Tvp23b
ENSMUSG00000029415	1.5316	2.46727	1.00466	2.45582	0.0140563	0.149496	Sdad1
ENSMUSG00000050530	5.69475	-2.81845	1.14852	-2.45399	0.014128	0.149496	Fam171a1
ENSMUSG00000050628	2.60732	-2.086	0.84998	-2.45418	0.0141207	0.149496	Ubald2
ENSMUSG00000053646	24.1652	2.00767	0.818204	2.45376	0.0141373	0.149496	Plxnb1
ENSMUSG00000054452	39.3255	-1.44702	0.5893	-2.45549	0.0140694	0.149496	Aes
ENSMUSG00000002489	3.09224	2.58014	1.05568	2.44407	0.0145228	0.152269	Tiam1
ENSMUSG00000015002	19.4081	1.81927	0.744253	2.44442	0.0145084	0.152269	Efr3a
ENSMUSG00000021190	30.5993	2.35979	0.965017	2.44533	0.0144718	0.152269	Lgmn
ENSMUSG00000021385	1.8679	2.59204	1.05975	2.44589	0.0144495	0.152269	Ippk
ENSMUSG00000032123	12.8747	2.8032	1.1468	2.44438	0.0145103	0.152269	Dpagt1
ENSMUSG00000036398	18.9494	-2.24953	0.920122	-2.44482	0.0144926	0.152269	Ppp1r11
ENSMUSG00000037692	15.4882	1.86318	0.762033	2.44501	0.0144849	0.152269	Ahdc1
ENSMUSG00000029309	291.169	-2.16115	0.885247	-2.44129	0.0146347	0.153106	Sparcl1
ENSMUSG00000039850	1.42673	2.50134	1.02463	2.44121	0.014638	0.153106	Endov
ENSMUSG00000037553	38.8636	-2.26835	0.931508	-2.43513	0.0148863	0.155515	Zdhhc18
ENSMUSG00000023277	2.91524	-2.98112	1.22496	-2.43364	0.0149477	0.15578	Twf2
ENSMUSG00000024927	103.007	-1.51286	0.621535	-2.43408	0.0149297	0.15578	Rela
ENSMUSG00000025995	12.1202	2.65895	1.09305	2.43259	0.0149912	0.156018	Wdr75
ENSMUSG00000029380	251.819	-2.98549	1.22748	-2.43222	0.0150066	0.156018	Cxcl1
ENSMUSG00000074182	12.179	2.60125	1.06982	2.43149	0.015037	0.156146	Znhit6
ENSMUSG00000002660	26.6152	-2.55257	1.05026	-2.43041	0.0150819	0.156425	Clpp
ENSMUSG00000055917	7.77416	-2.72163	1.12008	-2.42986	0.0151046	0.156473	Zfp277
ENSMUSG00000062753	1.79811	2.42377	0.997695	2.42937	0.0151249	0.156496	AI413582
ENSMUSG00000020810	42.939	-3.55348	1.46338	-2.42827	0.015171	0.156785	Cygb
ENSMUSG00000022018	121.893	1.55142	0.639023	2.42781	0.0151905	0.156799	Rgcc
ENSMUSG00000036860	4.46524	-2.75014	1.1333	-2.42666	0.0152385	0.156938	Mrpl55
ENSMUSG00000067276	28.6134	2.49197	1.02693	2.42662	0.0152402	0.156938	Capn6
ENSMUSG00000026603	5.0638	2.6569	1.09555	2.42518	0.0153009	0.157375	Smyd2
ENSMUSG00000051650	2.37697	-1.83176	0.755573	-2.42433	0.0153365	0.157554	B3gnt2
ENSMUSG00000043067	10.1965	2.3362	0.964145	2.42308	0.0153894	0.15791	Dpy19l1
ENSMUSG00000041040	12.9037	2.3912	0.987107	2.42243	0.0154171	0.158007	Fam117b
ENSMUSG00000042082	12.5357	2.19719	0.907811	2.42032	0.0155069	0.158739	Arsb
ENSMUSG00000024146	17.378	-2.12821	0.879675	-2.41931	0.0155499	0.158814	Cript
ENSMUSG00000024271	9.68839	2.79416	1.15495	2.41929	0.015551	0.158814	Elp2
ENSMUSG00000027809	4.93552	2.79698	1.15699	2.41746	0.0156291	0.158999	Etfdh
ENSMUSG00000035049	6.37157	3.04408	1.25922	2.41743	0.0156305	0.158999	Rrp12
ENSMUSG00000060227	15.937	1.78871	0.739785	2.41788	0.0156112	0.158999	Casc4
ENSMUSG00000083483	2.41073	-1.28135	0.530107	-2.41715	0.0156425	0.158999	Gm14044
ENSMUSG00000020894	41.4413	-1.64003	0.678855	-2.41588	0.0156972	0.159327	Vamp2
ENSMUSG00000022946	31.0584	-2.31174	0.957024	-2.41555	0.0157116	0.159327	Dopey2
ENSMUSG00000037580	33.3888	-2.63937	1.09333	-2.41406	0.015776	0.159792	Gch1
ENSMUSG00000025155	6.07864	2.70907	1.12283	2.41272	0.0158339	0.15992	Dus1l
ENSMUSG00000045636	31.8347	1.96251	0.813519	2.41237	0.0158492	0.15992	Mtus1
ENSMUSG00000060419	26.3903	-0.808554	0.335066	-2.41312	0.0158167	0.15992	Rps16-ps2
ENSMUSG00000072407	1.52344	2.18085	0.904144	2.41206	0.0158626	0.15992	Gm6419
ENSMUSG00000025268	83.8341	1.75789	0.729412	2.41001	0.0159519	0.160633	Maged2
ENSMUSG00000047766	5.44516	2.81243	1.16764	2.40865	0.0160118	0.161049	Lrrc49
ENSMUSG00000004567	21.7416	2.57241	1.06828	2.408	0.0160401	0.161051	Mcoln1
ENSMUSG00000050114	2.1468	-1.5678	0.651135	-2.40779	0.0160492	0.161051	Prdx6b
ENSMUSG00000020902	17.7789	-2.36633	0.983412	-2.40624	0.0161175	0.161548	Ntn1
ENSMUSG00000026810	25.3579	1.99782	0.830649	2.40513	0.0161665	0.161852	Dpm2
ENSMUSG00000030054	1.01449	-1.84751	0.768406	-2.40434	0.0162018	0.162018	Gp9
ENSMUSG00000079139	19.0829	-1.6388	0.681936	-2.40315	0.0162544	0.162357	Gm4204
ENSMUSG00000038312	11.7842	2.90138	1.20755	2.40269	0.0162749	0.162374	Edem2
ENSMUSG00000107283	14.372	-2.39915	0.99875	-2.40215	0.0162989	0.162426	Mpv17
ENSMUSG00000029468	6.41424	3.05882	1.27418	2.40062	0.0163673	0.162919	P2rx7
ENSMUSG00000104053	2.1074	2.49404	1.0391	2.4002	0.0163861	0.162919	Gm38126
ENSMUSG00000000811	4.99562	2.66777	1.11203	2.399	0.01644	0.163248	Txnrd3
ENSMUSG00000029163	83.6644	1.78082	0.742436	2.39862	0.0164569	0.163248	Emilin1
ENSMUSG00000081010	2.90331	-1.98559	0.828101	-2.39776	0.0164957	0.163445	Gm13880
ENSMUSG00000026185	374.757	-1.56882	0.654427	-2.39725	0.0165187	0.163486	Igfbp5
ENSMUSG00000038776	101.753	-2.02359	0.844592	-2.39593	0.0165781	0.163887	Ephx1
ENSMUSG00000030397	5.73433	-2.62654	1.09654	-2.39529	0.0166071	0.163986	Mark4
ENSMUSG00000015087	22.5939	-1.78365	0.745212	-2.39348	0.0166895	0.164444	Rabl6
ENSMUSG00000043870	0.775612	2.00254	0.836826	2.39302	0.0167105	0.164444	Gm5809
ENSMUSG00000051331	8.26811	2.11083	0.882058	2.39307	0.016708	0.164444	Cacna1c
ENSMUSG00000084183	2.96595	-1.10405	0.461448	-2.39259	0.01673	0.164448	Gm12009
ENSMUSG00000057863	1.79179	-1.5441	0.645869	-2.39073	0.0168148	0.165094	Rpl36
ENSMUSG00000038733	54.6134	-1.53792	0.643576	-2.38964	0.0168648	0.165397	Wdr26
ENSMUSG00000041577	495.743	1.44394	0.605398	2.3851	0.0170744	0.167263	Prelp
ENSMUSG00000022314	19.2159	-1.87601	0.787134	-2.38334	0.0171563	0.167308	Rad21
ENSMUSG00000031375	1167.2	0.998697	0.418964	2.38373	0.0171382	0.167308	Bgn
ENSMUSG00000039914	15.2288	-2.88771	1.21151	-2.38356	0.0171461	0.167308	Coq10a
ENSMUSG00000040234	25.3858	2.08977	0.876726	2.3836	0.0171441	0.167308	Tm7sf3
ENSMUSG00000083364	0.863506	1.84154	0.772829	2.38285	0.0171791	0.167341	Llph-ps2
ENSMUSG00000025092	2.53552	-2.71892	1.14133	-2.38225	0.0172073	0.167428	Hspa12a
ENSMUSG00000028437	40.6418	-1.85534	0.779834	-2.37915	0.0173526	0.168652	Ubap1
ENSMUSG00000031342	40.7505	2.75333	1.15824	2.37718	0.0174458	0.169367	Gpm6b
ENSMUSG00000024357	20.2137	2.09334	0.880997	2.37611	0.0174964	0.169478	Sil1
ENSMUSG00000038290	28.4485	-2.00478	0.8436	-2.37646	0.0174795	0.169478	Smg6
ENSMUSG00000026473	90.3804	-1.87536	0.789738	-2.37466	0.0175649	0.169656	Glul
ENSMUSG00000031169	4.45226	2.96874	1.25027	2.37448	0.0175736	0.169656	Porcn
ENSMUSG00000079834	4.17069	2.74164	1.15434	2.37508	0.0175451	0.169656	Tmlhe
ENSMUSG00000024381	29.842	-2.30422	0.970776	-2.37358	0.0176164	0.169879	Bin1
ENSMUSG00000025225	61.9299	-1.76621	0.745122	-2.37036	0.0177706	0.171054	Nfkb2
ENSMUSG00000041645	41.4129	-1.71956	0.725486	-2.37021	0.0177778	0.171054	Ddx24
ENSMUSG00000027680	31.0273	-1.60992	0.679385	-2.36967	0.0178038	0.171115	Fxr1
ENSMUSG00000099397	19.4057	-1.4897	0.628981	-2.36843	0.0178638	0.171501	Gm7809
ENSMUSG00000021986	2.03713	-2.22449	0.939729	-2.36716	0.017925	0.171517	Amer2
ENSMUSG00000027386	109.591	2.11812	0.89478	2.3672	0.0179235	0.171517	Fbln7
ENSMUSG00000096768	0.803612	1.59468	0.67366	2.36718	0.0179241	0.171517	Gm47283
ENSMUSG00000026155	13.2665	-1.84221	0.778602	-2.36605	0.0179789	0.171739	Smap1
ENSMUSG00000063754	1.63321	-1.37173	0.579802	-2.36587	0.0179879	0.171739	Gm10136
ENSMUSG00000106239	1.57711	-1.6569	0.700712	-2.36459	0.0180498	0.17214	Gm9260
ENSMUSG00000032243	52.0319	2.03466	0.860889	2.36344	0.0181061	0.172487	Itga11
ENSMUSG00000034190	17.7333	-2.86953	1.21475	-2.36224	0.0181647	0.17285	Chmp7
ENSMUSG00000102550	31.0224	-0.984509	0.416839	-2.36185	0.0181842	0.17285	Gm8276
ENSMUSG00000058799	23.9407	-1.63208	0.691385	-2.3606	0.0182455	0.173242	Nap1l1
ENSMUSG00000027944	1.42032	1.92075	0.815028	2.35666	0.01844	0.174897	Hax1
ENSMUSG00000035112	5.20749	2.59252	1.10069	2.35535	0.0185053	0.175133	Wnk4
ENSMUSG00000071064	2.76908	2.30627	0.979148	2.35538	0.0185036	0.175133	Zfp827
ENSMUSG00000017837	7.34761	-3.02687	1.28593	-2.35384	0.0185805	0.175467	Nkiras2
ENSMUSG00000040459	13.6514	-1.72283	0.731926	-2.35383	0.0185813	0.175467	Arglu1
ENSMUSG00000028557	78.5134	-1.60829	0.684091	-2.35099	0.0187234	0.176425	Rnf11
ENSMUSG00000038481	3.19114	2.40637	1.02345	2.35122	0.018712	0.176425	Cdk19
ENSMUSG00000028920	32.7504	-2.51526	1.07023	-2.35021	0.0187629	0.176604	Fbxo42
ENSMUSG00000022010	580.357	1.30009	0.553473	2.34897	0.0188254	0.177	Tsc22d1
ENSMUSG00000020917	61.8724	1.54691	0.658825	2.34798	0.0188753	0.177277	Acly
ENSMUSG00000035248	43.2885	-1.76871	0.753442	-2.34751	0.0188994	0.17731	Zcchc6
ENSMUSG00000010045	13.185	2.70311	1.1529	2.34463	0.0190462	0.178493	Tmem115
ENSMUSG00000082454	137.513	-0.911392	0.388897	-2.34353	0.0191021	0.178824	Gm12183
ENSMUSG00000002844	38.0638	-1.95527	0.835063	-2.34147	0.0192081	0.178901	Adprh
ENSMUSG00000018537	4.83828	2.08725	0.891612	2.34098	0.0192331	0.178901	Pcgf2
ENSMUSG00000021943	34.1039	2.33333	0.996741	2.34095	0.0192345	0.178901	Gdf10
ENSMUSG00000024542	6.62501	2.66617	1.13798	2.3429	0.0191346	0.178901	Cep192
ENSMUSG00000034893	19.9322	-2.1057	0.899449	-2.3411	0.0192271	0.178901	Cog3
ENSMUSG00000037787	7.33039	2.17269	0.927962	2.34136	0.0192137	0.178901	Apopt1
ENSMUSG00000026918	20.2533	-2.03062	0.867658	-2.34035	0.0192658	0.179	Brd3
ENSMUSG00000031357	21.2609	-1.92648	0.823487	-2.33941	0.019314	0.179255	Syap1
ENSMUSG00000071379	6.66036	-2.84486	1.21643	-2.33869	0.0193514	0.179405	Hpcal1
ENSMUSG00000089764	47.085	-0.926232	0.396113	-2.3383	0.0193716	0.179405	Gm16580
ENSMUSG00000026849	17.1471	-2.14339	0.917163	-2.33698	0.0194402	0.179848	Tor1a
ENSMUSG00000039197	64.5806	1.65935	0.71017	2.33656	0.0194621	0.179858	Adk
ENSMUSG00000004771	50.0135	-1.63523	0.700088	-2.33575	0.0195044	0.180057	Rab11a
ENSMUSG00000033653	6.42119	2.37661	1.01767	2.33533	0.0195262	0.180065	Vps8
ENSMUSG00000002107	54.2894	-2.57965	1.10563	-2.3332	0.0196377	0.180313	Celf2
ENSMUSG00000022842	5.57602	2.89294	1.23982	2.33336	0.0196295	0.180313	Ece2
ENSMUSG00000022867	46.6612	-1.95611	0.838431	-2.33305	0.0196453	0.180313	Usp25
ENSMUSG00000039361	68.3426	-1.34891	0.577901	-2.33416	0.0195873	0.180313	Picalm
ENSMUSG00000083087	0.543833	-1.47857	0.633809	-2.33283	0.0196572	0.180313	Gm11249
ENSMUSG00000023495	4.36058	2.97831	1.27785	2.33072	0.019768	0.180949	Pcbp4
ENSMUSG00000032194	42.7028	-1.99553	0.856189	-2.33071	0.0197685	0.180949	Kank2
ENSMUSG00000040124	1.70799	2.49124	1.06979	2.32871	0.0198743	0.181339	Gorab
ENSMUSG00000044465	9.28715	2.47701	1.0636	2.32889	0.0198651	0.181339	Fam160a2
ENSMUSG00000045767	41.7359	-1.56826	0.673473	-2.32862	0.0198794	0.181339	B230219D22Rik
ENSMUSG00000083012	10.6958	-2.21845	0.95281	-2.32832	0.0198949	0.181339	Fam220a
ENSMUSG00000030609	4.53879	2.60573	1.11952	2.32755	0.0199362	0.181524	Aen
ENSMUSG00000024140	105.355	-1.6766	0.720535	-2.32688	0.0199719	0.181658	Epas1
ENSMUSG00000060261	34.6176	1.44137	0.619667	2.32604	0.0200165	0.181873	Gtf2i
ENSMUSG00000041773	22.7726	2.97742	1.28154	2.32331	0.0201626	0.183008	Enc1
ENSMUSG00000028576	7.81938	2.89979	1.24916	2.32139	0.020266	0.183562	Ift74
ENSMUSG00000041268	43.5179	-2.48545	1.07066	-2.32141	0.0202646	0.183562	Dmxl2
ENSMUSG00000028124	24.0427	-2.21725	0.956048	-2.31918	0.020385	0.184446	Gclm
ENSMUSG00000020400	29.8068	-1.84727	0.796772	-2.31844	0.0204254	0.184618	Tnip1
ENSMUSG00000090213	18.8594	-2.17993	0.940952	-2.31673	0.0205185	0.185266	Tmem189
ENSMUSG00000029634	4.66375	2.32962	1.00585	2.31608	0.0205541	0.185394	Rnf6
ENSMUSG00000019936	70.9446	3.01752	1.30335	2.31521	0.0206017	0.185552	Epyc
ENSMUSG00000024164	27.7958	-2.69668	1.16508	-2.31458	0.020636	0.185552	C3
ENSMUSG00000039740	7.74026	2.27898	0.984502	2.31485	0.020621	0.185552	Alg2
ENSMUSG00000052911	124.451	-1.28551	0.555629	-2.31362	0.0206886	0.185832	Lamb2
ENSMUSG00000028382	51.8844	-1.55654	0.673317	-2.31174	0.0207919	0.186566	Ptbp3
ENSMUSG00000003665	85.1922	-2.22937	0.965283	-2.30955	0.0209131	0.187375	Has1
ENSMUSG00000026915	19.9373	-2.62825	1.1381	-2.30933	0.0209253	0.187375	Strbp
ENSMUSG00000000532	4.66583	2.39624	1.0384	2.30763	0.0210197	0.187953	Acvr1b
ENSMUSG00000055044	5.27521	-2.73749	1.1864	-2.30739	0.0210334	0.187953	Pdlim1
ENSMUSG00000031166	11.2289	-1.95865	0.849431	-2.30584	0.0211195	0.188008	Wdr13
ENSMUSG00000040029	7.93354	-2.18917	0.949454	-2.30572	0.0211264	0.188008	Ipo8
ENSMUSG00000079469	4.52445	-2.52929	1.09678	-2.3061	0.0211051	0.188008	Pigb
ENSMUSG00000106219	0.52569	-1.49784	0.64948	-2.30621	0.0210988	0.188008	5830416I19Rik
ENSMUSG00000028252	4.81875	2.33899	1.01519	2.30399	0.0212232	0.188675	Ccnc
ENSMUSG00000022544	2.03991	2.46026	1.06828	2.303	0.0212789	0.188782	Eef2kmt
ENSMUSG00000024899	124.829	2.08502	0.90529	2.30316	0.02127	0.188782	Papss2
ENSMUSG00000045103	9.53828	-2.71081	1.17959	-2.29808	0.021557	0.190858	Dmd
ENSMUSG00000071866	5.06365	2.105	0.915897	2.29829	0.0215452	0.190858	Ppia
ENSMUSG00000034271	49.7096	-2.35501	1.02534	-2.2968	0.0216302	0.191234	Jdp2
ENSMUSG00000041355	77.9078	1.60686	0.699679	2.29656	0.0216438	0.191234	Ssr2
ENSMUSG00000026655	32.8841	-3.45095	1.50329	-2.2956	0.0216985	0.191241	Fam107b
ENSMUSG00000051154	35.1127	1.94897	0.848928	2.2958	0.0216871	0.191241	Commd3
ENSMUSG00000097703	4.9327	-1.48405	0.646534	-2.29539	0.0217109	0.191241	Gm26623
ENSMUSG00000014763	23.4894	-1.96284	0.855814	-2.29354	0.0218169	0.191805	Fam120b
ENSMUSG00000060284	11.8011	2.43994	1.06385	2.2935	0.0218192	0.191805	Sp7
ENSMUSG00000024054	37.6074	-1.79938	0.784877	-2.29256	0.0218731	0.192083	Smchd1
ENSMUSG00000018474	14.4135	-1.83961	0.80312	-2.29058	0.0219879	0.19285	Chd3
ENSMUSG00000029188	0.419056	-1.32889	0.580329	-2.2899	0.0220272	0.19285	Slc34a2
ENSMUSG00000042369	1.42984	-2.36055	1.03081	-2.28999	0.0220218	0.19285	Rbm45
ENSMUSG00000024487	30.1754	1.74684	0.763766	2.28714	0.0221876	0.193861	Yipf5
ENSMUSG00000106110	2.68577	2.51902	1.10127	2.28737	0.022174	0.193861	Gm43571
ENSMUSG00000019997	718.28	1.5432	0.675005	2.28621	0.0222419	0.194139	Ctgf
ENSMUSG00000039195	5.5668	2.45668	1.07505	2.28518	0.0223024	0.194471	1110008P14Rik
ENSMUSG00000035529	6.41852	1.91896	0.840825	2.28224	0.0224754	0.195783	Prdm4
ENSMUSG00000015127	2.72314	2.24608	0.984944	2.28041	0.0225833	0.196525	Unkl
ENSMUSG00000029422	78.1621	-1.39165	0.610731	-2.27865	0.0226876	0.197234	Rsrc2
ENSMUSG00000023050	16.0525	-2.17271	0.953716	-2.27816	0.0227173	0.197294	Map3k12
ENSMUSG00000021494	12.326	2.60222	1.14308	2.2765	0.0228161	0.197717	Ddx41
ENSMUSG00000041482	44.4022	-2.56984	1.12897	-2.27628	0.0228295	0.197717	Piezo2
ENSMUSG00000105421	0.735858	-1.74403	0.766208	-2.27619	0.0228346	0.197717	5830411K02Rik
ENSMUSG00000031283	44.4896	1.90181	0.835708	2.27569	0.0228645	0.197778	Chrdl1
ENSMUSG00000024235	27.4022	-2.42335	1.06544	-2.27452	0.0229349	0.198158	Map3k8
ENSMUSG00000081302	5.02298	-1.25574	0.552169	-2.2742	0.0229542	0.198158	Gm12020
ENSMUSG00000018774	30.1086	-2.57282	1.13166	-2.27349	0.0229968	0.198327	Cd68
ENSMUSG00000104963	3.76375	-2.01885	0.888308	-2.27269	0.0230446	0.198542	Gm42974
ENSMUSG00000036461	47.2359	-1.5322	0.67478	-2.27066	0.0231674	0.199401	Elf1
ENSMUSG00000028163	114.011	-1.44724	0.637656	-2.26963	0.02323	0.199741	Nfkb1
ENSMUSG00000044006	95.749	2.2182	0.97876	2.26633	0.023431	0.20127	Cilp2
ENSMUSG00000061315	14.3845	-0.970785	0.428593	-2.26505	0.0235094	0.201743	Naca
ENSMUSG00000051116	2.19606	-2.24281	0.991169	-2.26279	0.0236486	0.202543	Gm8121
ENSMUSG00000066026	36.8883	-1.91623	0.846849	-2.26278	0.0236495	0.202543	Dhrs3
ENSMUSG00000031298	10.0969	2.52585	1.1166	2.26209	0.023692	0.202706	Adgrg2
ENSMUSG00000047557	17.3025	2.48971	1.10092	2.26148	0.0237293	0.202825	Lxn
ENSMUSG00000030101	27.8505	-2.04807	0.905812	-2.26103	0.0237572	0.202863	Sumf1
ENSMUSG00000062461	0.457575	-1.57553	0.697587	-2.25855	0.0239117	0.20398	Gm5453
ENSMUSG00000001518	3.56344	2.54245	1.1259	2.25816	0.023936	0.203986	Itfg2
ENSMUSG00000042834	43.9451	1.78134	0.78922	2.25708	0.0240028	0.204355	Nrep
ENSMUSG00000071547	20.8039	2.17546	0.964247	2.25612	0.0240631	0.204465	Nt5dc2
ENSMUSG00000084319	43.5378	-0.71888	0.318617	-2.25625	0.024055	0.204465	Tpt1-ps3
ENSMUSG00000022602	126.153	2.95643	1.31126	2.25465	0.0241556	0.204858	Arc
ENSMUSG00000046516	6.02837	-1.93124	0.856567	-2.25463	0.0241566	0.204858	Cox17
ENSMUSG00000051427	3.02623	1.90612	0.845858	2.25348	0.0242292	0.205272	Ccdc157
ENSMUSG00000032249	10.0486	-1.64237	0.729211	-2.25226	0.0243061	0.205722	Anp32a
ENSMUSG00000022013	5.64728	2.4741	1.09934	2.25053	0.0244154	0.206445	Dnajc15
ENSMUSG00000019055	41.8965	1.60269	0.712378	2.24978	0.0244628	0.206643	Plod1
ENSMUSG00000030342	405.314	-0.976802	0.434292	-2.24918	0.0245008	0.206763	Cd9
ENSMUSG00000003421	2.27959	2.41759	1.07514	2.24863	0.0245364	0.206787	Nosip
ENSMUSG00000058152	7.15581	2.30558	1.02544	2.24839	0.0245515	0.206787	Chsy3
ENSMUSG00000002728	6.67881	2.2606	1.00595	2.24723	0.0246255	0.207208	Naa20
ENSMUSG00000000266	7.48928	2.35875	1.05014	2.24613	0.0246957	0.207598	Mid2
ENSMUSG00000020133	9.30877	-2.86112	1.2743	-2.24524	0.0247525	0.207873	2310011J03Rik
ENSMUSG00000027377	5.41969	2.555	1.13826	2.24466	0.0247902	0.207987	Mall
ENSMUSG00000022283	153.072	-0.866517	0.38626	-2.24335	0.0248743	0.208197	Pabpc1
ENSMUSG00000036427	57.409	-1.30367	0.581095	-2.24347	0.0248663	0.208197	Gpi1
ENSMUSG00000078974	4.42009	-1.4657	0.653411	-2.24315	0.0248873	0.208197	Sec61g
ENSMUSG00000017817	4.57267	-1.02046	0.455312	-2.24124	0.0250108	0.208423	Jph2
ENSMUSG00000021549	29.9019	-1.81727	0.810647	-2.24175	0.0249774	0.208423	Rasa1
ENSMUSG00000032553	26.0129	2.08558	0.930512	2.24132	0.0250054	0.208423	Srprb
ENSMUSG00000101262	0.422339	-1.5347	0.684512	-2.24203	0.0249594	0.208423	Gm8326
ENSMUSG00000028197	12.6324	2.51515	1.12246	2.24076	0.0250418	0.208481	Col24a1
ENSMUSG00000059714	56.969	-1.58475	0.707837	-2.23887	0.0251643	0.209299	Flot1
ENSMUSG00000084249	4.70541	-1.03586	0.462922	-2.23765	0.0252438	0.209759	Gm12267
ENSMUSG00000073481	39.1075	-1.76938	0.791323	-2.23598	0.025353	0.21018	Mtarc2
ENSMUSG00000000794	1.60144	-1.61911	0.724146	-2.23588	0.0253594	0.21018	Kcnn3
ENSMUSG00000057160	0.925726	-1.90204	0.850736	-2.23576	0.0253673	0.21018	Gm16372
ENSMUSG00000002332	5.81644	2.29088	1.02516	2.23465	0.0254402	0.210437	Dhrs1
ENSMUSG00000032064	19.7986	2.14636	0.960804	2.23392	0.0254885	0.210437	Dixdc1
ENSMUSG00000056749	63.7591	-2.29129	1.02552	-2.23427	0.0254653	0.210437	Nfil3
ENSMUSG00000067212	54.4121	-2.08673	0.934159	-2.23381	0.0254957	0.210437	H2-T23
ENSMUSG00000006476	14.4754	2.24614	1.00631	2.23205	0.0256117	0.211193	Nsmf
ENSMUSG00000031657	2.54949	2.35696	1.05652	2.23087	0.0256898	0.211635	Heatr3
ENSMUSG00000026914	29.0096	2.02309	0.907368	2.22962	0.0257726	0.212115	Psmd14
ENSMUSG00000021248	46.581	1.15054	0.516203	2.22885	0.0258239	0.212304	Tmed10
ENSMUSG00000040254	27.2306	2.19706	0.985876	2.22854	0.0258446	0.212304	Sema3d
ENSMUSG00000020745	92.4695	-1.07297	0.482005	-2.22605	0.0260106	0.212658	Pafah1b1
ENSMUSG00000021681	20.0332	-2.49601	1.12102	-2.22655	0.0259775	0.212658	Aggf1
ENSMUSG00000022828	2.48448	2.51311	1.12887	2.22622	0.0259992	0.212658	Gtf2e1
ENSMUSG00000031930	192.441	1.51304	0.679496	2.22671	0.0259664	0.212658	Wwp2
ENSMUSG00000042608	53.1034	-1.72841	0.776123	-2.22698	0.0259483	0.212658	Stk40
ENSMUSG00000050079	2.84192	2.28874	1.02847	2.22538	0.026056	0.212828	Rspry1
ENSMUSG00000068856	3.5415	-1.92889	0.867145	-2.22442	0.0261201	0.21315	Sf3b4
ENSMUSG00000022151	2.18581	-2.48537	1.11751	-2.22402	0.0261474	0.213172	Ttc33
ENSMUSG00000032312	24.7757	-1.89321	0.851542	-2.22328	0.0261972	0.213377	Csk
ENSMUSG00000020282	19.79	-1.83743	0.826923	-2.222	0.0262831	0.213875	Rhbdf1
ENSMUSG00000031485	22.6505	-2.10587	0.948408	-2.22043	0.0263895	0.214136	Plpbp
ENSMUSG00000052512	7.7087	1.66546	0.750016	2.22057	0.0263803	0.214136	Nav2
ENSMUSG00000098343	4.34687	0.720723	0.324515	2.22092	0.0263563	0.214136	Mir6240
ENSMUSG00000039357	10.6184	1.96879	0.887992	2.21712	0.0266147	0.215661	Fut11
ENSMUSG00000100913	1.09241	-1.53256	0.691298	-2.21694	0.0266273	0.215661	Gm8392
ENSMUSG00000019969	18.721	2.00182	0.903956	2.21451	0.0267939	0.216605	Psen1
ENSMUSG00000022656	10.1846	1.99217	0.899532	2.21468	0.0267824	0.216605	Nectin3
ENSMUSG00000019689	10.119	-2.19723	0.99238	-2.2141	0.0268217	0.216627	Fmc1
ENSMUSG00000018501	105.423	-1.07623	0.486377	-2.21276	0.0269145	0.216971	Ncor1
ENSMUSG00000020153	42.5364	-1.31369	0.593653	-2.21288	0.0269056	0.216971	Ndufs7
ENSMUSG00000037935	6.92631	-2.05515	0.929002	-2.21221	0.026952	0.217071	Smarce1
ENSMUSG00000009112	18.3777	-2.63298	1.19248	-2.20798	0.0272457	0.21796	Bcl2l13
ENSMUSG00000026072	35.1888	1.92979	0.874273	2.20731	0.0272924	0.21796	Il1r1
ENSMUSG00000028341	122.698	-1.89172	0.856289	-2.20921	0.02716	0.21796	Nr4a3
ENSMUSG00000028641	71.5897	1.66068	0.75224	2.20764	0.0272691	0.21796	P3h1
ENSMUSG00000032244	30.1229	1.94988	0.882781	2.20879	0.0271893	0.21796	Fem1b
ENSMUSG00000036940	33.1158	1.7441	0.790257	2.207	0.0273143	0.21796	Kdm1a
ENSMUSG00000041515	0.850069	-2.27166	1.02911	-2.2074	0.0272862	0.21796	Irf8
ENSMUSG00000042121	26.523	2.10869	0.955288	2.20738	0.0272873	0.21796	Ssh1
ENSMUSG00000042680	6.31964	2.44849	1.10816	2.20952	0.0271386	0.21796	Garem1
ENSMUSG00000047989	4.02378	2.41109	1.09089	2.21021	0.0270904	0.21796	Ino80c
ENSMUSG00000047213	19.7628	-1.74175	0.789551	-2.206	0.0273838	0.218313	Ythdf3
ENSMUSG00000044791	30.2028	-1.52105	0.689814	-2.20502	0.0274529	0.218662	Setd2
ENSMUSG00000026171	3.62887	2.58311	1.17224	2.20357	0.0275547	0.219271	Rnf25
ENSMUSG00000021686	36.7166	-1.81476	0.824181	-2.2019	0.0276725	0.219309	Ap3b1
ENSMUSG00000021967	7.4031	2.19855	0.998541	2.20176	0.027682	0.219309	Mrpl57
ENSMUSG00000028180	48.8711	-1.85105	0.840724	-2.20173	0.0276843	0.219309	Zranb2
ENSMUSG00000063931	11.915	2.35538	1.0698	2.20171	0.0276862	0.219309	Pepd
ENSMUSG00000067873	30.8563	-1.93155	0.877049	-2.20233	0.0276423	0.219309	Htatsf1
ENSMUSG00000020485	9.06131	-2.10505	0.95662	-2.20051	0.0277709	0.219378	Supt4a
ENSMUSG00000031841	6.39504	-2.32894	1.05811	-2.20104	0.0277331	0.219378	Cdh13
ENSMUSG00000040009	0.95268	-1.12179	0.509759	-2.20063	0.0277625	0.219378	Gnaz
ENSMUSG00000036504	4.232	1.53603	0.69818	2.20004	0.0278037	0.219436	Phpt1
ENSMUSG00000026626	32.4068	-1.5156	0.689105	-2.19938	0.0278509	0.219527	Ppp2r5a
ENSMUSG00000037902	37.1062	-2.53019	1.15052	-2.19917	0.0278659	0.219527	Sirpa
ENSMUSG00000030960	6.91241	2.23002	1.0147	2.19772	0.0279693	0.219992	Eef1akmt2
ENSMUSG00000070733	49.7172	-1.71975	0.782549	-2.19762	0.0279759	0.219992	Fryl
ENSMUSG00000007415	14.2503	-1.65808	0.754767	-2.19681	0.0280339	0.220248	Gatad1
ENSMUSG00000020758	3.33051	2.33248	1.06248	2.19532	0.0281409	0.220488	Itgb4
ENSMUSG00000030224	31.406	1.84861	0.841947	2.19563	0.0281181	0.220488	Strap
ENSMUSG00000032601	15.6445	1.87737	0.854913	2.19598	0.0280935	0.220488	Prkar2a
ENSMUSG00000033054	6.65105	2.21751	1.01066	2.19411	0.0282272	0.220964	Npat
ENSMUSG00000021096	21.689	-1.485	0.677024	-2.19342	0.0282768	0.221152	Ppm1a
ENSMUSG00000029922	19.4076	-1.77418	0.809138	-2.19268	0.0283306	0.221173	Mkrn1
ENSMUSG00000032434	28.8512	-2.36479	1.07839	-2.19289	0.0283155	0.221173	Cmtm6
ENSMUSG00000026179	11.0331	-1.713	0.781914	-2.19078	0.0284678	0.221843	Pnkd
ENSMUSG00000029810	106.111	1.32032	0.602613	2.19099	0.0284523	0.221843	Tmem176b
ENSMUSG00000048807	33.0256	2.18197	0.996482	2.18968	0.0285477	0.222266	Slc35e4
ENSMUSG00000024663	4.80049	-3.01806	1.37868	-2.1891	0.0285897	0.222393	Rab3il1
ENSMUSG00000002014	57.5397	1.35927	0.6214	2.18743	0.0287114	0.223044	Ssr4
ENSMUSG00000016995	5.72168	2.57602	1.17775	2.18724	0.028725	0.223044	Matn4
ENSMUSG00000029267	13.7207	-2.27003	1.03892	-2.185	0.0288892	0.224082	Mtf2
ENSMUSG00000090592	1.89409	1.91119	0.874804	2.18471	0.0289105	0.224082	Gm17571
ENSMUSG00000061330	0.307949	-1.3084	0.598995	-2.18432	0.0289385	0.224099	Gm6436
ENSMUSG00000021669	32.6034	-1.90711	0.873369	-2.18363	0.0289896	0.224293	Col4a3bp
ENSMUSG00000024758	94.0149	-1.41842	0.649992	-2.18221	0.0290944	0.224787	Rtn3
ENSMUSG00000044017	16.563	-2.34398	1.0742	-2.18206	0.0291053	0.224787	Adgrd1
ENSMUSG00000036775	3.68717	2.38833	1.09474	2.18165	0.0291357	0.224821	Decr2
ENSMUSG00000019907	36.6483	-1.53299	0.703401	-2.1794	0.029302	0.225755	Ppp1r12a
ENSMUSG00000025558	22.5551	-1.78027	0.816898	-2.17931	0.029309	0.225755	Dock9
ENSMUSG00000022094	43.537	2.05375	0.943054	2.17776	0.029424	0.226439	Slc39a14
ENSMUSG00000005102	11.9119	2.20364	1.01233	2.17679	0.0294964	0.226794	Eif2ak4
ENSMUSG00000028838	9.42317	2.71197	1.24607	2.17642	0.0295238	0.226804	Extl1
ENSMUSG00000001942	12.2388	2.28635	1.0513	2.17479	0.0296456	0.227537	Siae
ENSMUSG00000029253	3.376	-2.3054	1.06114	-2.17257	0.0298126	0.228527	Cenpc1
ENSMUSG00000089917	7.51449	2.26353	1.04196	2.17237	0.0298274	0.228527	Uckl1
ENSMUSG00000025794	48.3727	-0.862064	0.396905	-2.17197	0.0298583	0.228561	Rpl14
ENSMUSG00000003541	274.843	-1.31989	0.607875	-2.17133	0.0299065	0.228632	Ier3
ENSMUSG00000060301	9.71416	2.27908	1.04972	2.17114	0.0299204	0.228632	2610008E11Rik
ENSMUSG00000038384	13.2753	-1.97954	0.912044	-2.17045	0.0299731	0.228833	Setd1b
ENSMUSG00000071637	270.443	-1.57518	0.72593	-2.16988	0.030016	0.228958	Cebpd
ENSMUSG00000025147	13.6813	-1.7524	0.808143	-2.16842	0.0301265	0.228993	Mob2
ENSMUSG00000027615	9.17041	-2.6982	1.24396	-2.16905	0.0300789	0.228993	Hps3
ENSMUSG00000053175	32.4208	-1.9609	0.904188	-2.16868	0.0301067	0.228993	Bcl3
ENSMUSG00000086324	1667.74	-0.475232	0.21908	-2.16922	0.0300663	0.228993	Gm15564
ENSMUSG00000026755	16.3471	1.95393	0.901321	2.16785	0.0301702	0.229124	Arpc5l
ENSMUSG00000017707	339.755	-0.9662	0.445794	-2.16737	0.0302066	0.229199	Serinc3
ENSMUSG00000022837	8.28135	2.48729	1.14802	2.16659	0.0302664	0.22925	Iqcb1
ENSMUSG00000092193	44.4215	-0.993683	0.45857	-2.16691	0.0302414	0.22925	Cd9-ps
ENSMUSG00000032264	12.8375	2.62701	1.21281	2.16605	0.0303075	0.229299	Zw10
ENSMUSG00000058542	0.718674	-1.60175	0.739561	-2.16581	0.0303258	0.229299	Gm15590
ENSMUSG00000031604	46.8259	2.35655	1.08836	2.16524	0.0303693	0.229427	Msmo1
ENSMUSG00000022568	8.842	2.13087	0.984588	2.16422	0.0304474	0.229658	Scrib
ENSMUSG00000034342	10.339	-2.23708	1.0337	-2.16415	0.0304529	0.229658	Cbl
ENSMUSG00000066491	2.60542	-1.02771	0.47524	-2.16251	0.0305788	0.230407	Gm6265
ENSMUSG00000020908	3.50316	-1.531	0.708517	-2.16086	0.0307065	0.230522	Myh3
ENSMUSG00000025047	12.3141	1.79106	0.829102	2.16024	0.0307541	0.230522	Pdcd11
ENSMUSG00000026483	53.3919	-1.81129	0.838313	-2.16064	0.0307234	0.230522	Fam129a
ENSMUSG00000040003	6.73724	2.42024	1.11982	2.16128	0.0306739	0.230522	Magi2
ENSMUSG00000041351	7.16967	2.53955	1.17514	2.16105	0.0306913	0.230522	Rap1gap
ENSMUSG00000071649	10.8682	2.07837	0.962095	2.16026	0.0307527	0.230522	B3gat3
ENSMUSG00000032555	3.29379	2.52838	1.17063	2.15985	0.0307846	0.230551	Topbp1
ENSMUSG00000032388	10.8146	1.88427	0.872843	2.15877	0.0308677	0.230774	Spg21
ENSMUSG00000086938	2.62478	-1.89602	0.878179	-2.15904	0.0308473	0.230774	4930481A15Rik
ENSMUSG00000028567	2.39391	2.33009	1.07978	2.15793	0.0309335	0.230867	Txndc12
ENSMUSG00000035673	136.564	-1.49805	0.694156	-2.15809	0.0309208	0.230867	Sbno2
ENSMUSG00000020015	18.1971	-1.72402	0.799656	-2.15596	0.031087	0.231613	Cdk17
ENSMUSG00000045414	32.1624	1.73345	0.803963	2.15613	0.0310734	0.231613	1190002N15Rik
ENSMUSG00000018171	78.2367	-1.65749	0.768946	-2.15553	0.0311201	0.23166	Vmp1
ENSMUSG00000040033	16.9264	-1.98013	0.919358	-2.15382	0.0312544	0.23246	Stat2
ENSMUSG00000005034	12.2648	1.45483	0.675813	2.15271	0.0313416	0.23272	Prkacb
ENSMUSG00000106246	3.8366	-1.3258	0.615882	-2.15269	0.0313432	0.23272	Gm18867
ENSMUSG00000045983	113.217	-1.16818	0.542784	-2.15221	0.0313812	0.232802	Eif4g1
ENSMUSG00000020986	10.2842	1.71155	0.795549	2.15141	0.0314436	0.233065	Sec23a
ENSMUSG00000009585	5.37708	-2.69316	1.25244	-2.15033	0.0315288	0.233326	Apobec3
ENSMUSG00000032507	2.25652	2.17238	1.01045	2.14991	0.0315625	0.233326	Fbxl2
ENSMUSG00000047905	5.72053	-1.39166	0.647404	-2.1496	0.0315866	0.233326	Gm8566
ENSMUSG00000071337	9.44708	2.53522	1.17923	2.1499	0.0315635	0.233326	Tia1
ENSMUSG00000026942	8.88319	2.48072	1.15436	2.149	0.0316344	0.233479	Traf2
ENSMUSG00000061607	17.1709	-2.43025	1.13184	-2.14717	0.0317799	0.234353	Mdc1
ENSMUSG00000008855	21.3995	-1.73281	0.807423	-2.1461	0.0318651	0.234581	Hdac5
ENSMUSG00000028487	22.61	-2.32823	1.08482	-2.14619	0.0318576	0.234581	Bnc2
ENSMUSG00000026463	28.648	-1.68614	0.786065	-2.14503	0.0319502	0.235008	Atp2b4
ENSMUSG00000027953	22.2681	1.94693	0.908102	2.14395	0.0320368	0.235134	Slc50a1
ENSMUSG00000029106	79.4363	-1.48243	0.691394	-2.14412	0.0320231	0.235134	Add1
ENSMUSG00000041939	23.6941	-3.14848	1.46864	-2.1438	0.0320489	0.235134	Mvk
ENSMUSG00000005899	20.4021	-2.13729	0.997377	-2.14291	0.0321203	0.235458	Smpd4
ENSMUSG00000017639	58.8336	2.09522	0.978554	2.14114	0.0322628	0.236103	Rab11fip4
ENSMUSG00000040824	5.30501	-1.42182	0.664041	-2.14117	0.0322607	0.236103	Snrpd2
ENSMUSG00000021238	13.3513	-1.81369	0.848811	-2.13674	0.0326189	0.236352	Aldh6a1
ENSMUSG00000025584	14.2887	1.76139	0.823532	2.13882	0.03245	0.236352	Pde8a
ENSMUSG00000029191	10.4514	2.20407	1.03044	2.13896	0.0324391	0.236352	Rfc1
ENSMUSG00000029344	60.0024	-1.6618	0.777344	-2.13779	0.0325335	0.236352	Tpst2
ENSMUSG00000031112	29.3314	1.94074	0.908302	2.13667	0.0326248	0.236352	Stk26
ENSMUSG00000032040	2.9368	2.66056	1.2432	2.1401	0.0323466	0.236352	Dcps
ENSMUSG00000032959	23.3051	1.28686	0.601753	2.13853	0.0324741	0.236352	Pebp1
ENSMUSG00000034349	13.7407	2.18307	1.02164	2.13683	0.0326115	0.236352	Smc4
ENSMUSG00000038342	38.0599	1.49823	0.700139	2.1399	0.0323626	0.236352	Mlxip
ENSMUSG00000039701	27.9218	1.83712	0.859601	2.13718	0.0325837	0.236352	Usp53
ENSMUSG00000043542	2.3188	2.31468	1.08224	2.13878	0.0324536	0.236352	Zc2hc1a
ENSMUSG00000054079	26.8075	-1.91959	0.89839	-2.13669	0.0326228	0.236352	Utp18
ENSMUSG00000019850	11.408	-2.56935	1.20307	-2.13567	0.0327062	0.236546	Tnfaip3
ENSMUSG00000035202	4235.72	-0.447069	0.209313	-2.13589	0.0326882	0.236546	Lars2
ENSMUSG00000001052	42.7748	-1.49113	0.698326	-2.13529	0.0327371	0.236571	Sec24b
ENSMUSG00000021520	8.33324	-1.42673	0.668537	-2.1341	0.0328343	0.237076	Uqcrb
ENSMUSG00000025041	35.5882	-1.89295	0.887761	-2.13227	0.0329846	0.237401	Nt5c2
ENSMUSG00000029672	42.0296	2.10767	0.988642	2.13188	0.0330166	0.237401	Fam3c
ENSMUSG00000035960	2.84826	2.24415	1.05263	2.13196	0.0330105	0.237401	Apex1
ENSMUSG00000038248	21.0705	1.58285	0.74222	2.13259	0.0329586	0.237401	Sobp
ENSMUSG00000060279	20.8403	-1.85253	0.868511	-2.133	0.0329251	0.237401	Ap2a1
ENSMUSG00000020680	6.02125	-1.87978	0.883174	-2.12843	0.0333012	0.237854	Taf15
ENSMUSG00000022816	124.603	-1.41959	0.666725	-2.12921	0.0332372	0.237854	Fstl1
ENSMUSG00000030844	4.19065	-2.66542	1.25093	-2.13076	0.0331093	0.237854	Rgs10
ENSMUSG00000037563	18.1638	-0.718249	0.337504	-2.12812	0.033327	0.237854	Rps16
ENSMUSG00000039145	26.5914	-1.76133	0.826931	-2.12996	0.0331748	0.237854	Camk1d
ENSMUSG00000048787	6.51759	2.233	1.04912	2.12845	0.0333002	0.237854	Dcun1d3
ENSMUSG00000066324	18.2435	1.49906	0.704196	2.12875	0.0332748	0.237854	Impad1
ENSMUSG00000081833	0.409285	-1.47324	0.692003	-2.12894	0.0332589	0.237854	Gm13669
ENSMUSG00000082896	4.36723	-1.16461	0.546912	-2.12942	0.0332194	0.237854	Gm5844
ENSMUSG00000032589	2.16274	1.95867	0.920887	2.12693	0.0334256	0.238164	Bsn
ENSMUSG00000038806	26.5769	-2.08328	0.979403	-2.12709	0.0334126	0.238164	Sde2
ENSMUSG00000030220	138.676	-2.68304	1.26223	-2.12564	0.0335333	0.238381	Arhgdib
ENSMUSG00000039047	19.2534	1.5947	0.750242	2.12558	0.0335386	0.238381	Pigk
ENSMUSG00000085148	34.1895	-1.86392	0.876705	-2.12605	0.0334993	0.238381	Mir22hg
ENSMUSG00000069806	1.40566	1.80554	0.849694	2.12493	0.0335923	0.238566	Cacng7
ENSMUSG00000048058	44.4944	1.74315	0.820746	2.12386	0.0336818	0.239006	Ldlrad3
ENSMUSG00000048930	7.1486	2.65354	1.24972	2.1233	0.0337284	0.23914	Tada3
ENSMUSG00000025504	18.4081	2.07094	0.975584	2.12277	0.0337728	0.239259	Eps8l2
ENSMUSG00000079037	149.06	1.41963	0.668889	2.12236	0.0338072	0.239306	Prnp
ENSMUSG00000028798	31.8781	1.69133	0.797188	2.12162	0.0338694	0.239379	Eif3i
ENSMUSG00000068040	43.8725	1.32545	0.624747	2.12158	0.0338729	0.239379	Tm9sf4
ENSMUSG00000027774	7.5974	2.43407	1.14768	2.12087	0.0339329	0.239608	Gfm1
ENSMUSG00000048546	31.3888	-1.5397	0.726396	-2.11965	0.0340357	0.239969	Tob2
ENSMUSG00000062980	37.4405	-1.79618	0.847411	-2.1196	0.0340395	0.239969	Cped1
ENSMUSG00000030748	61.4209	-2.65717	1.25393	-2.11907	0.0340845	0.240091	Il4ra
ENSMUSG00000027782	49.5947	-1.33416	0.629785	-2.11843	0.0341384	0.240274	Kpna4
ENSMUSG00000024077	8.50029	-1.85362	0.875472	-2.11728	0.0342364	0.240377	Strn
ENSMUSG00000029576	0.806645	-1.87267	0.88424	-2.11783	0.0341899	0.240377	Radil
ENSMUSG00000029913	6.36429	2.03491	0.960996	2.1175	0.0342177	0.240377	Prdm5
ENSMUSG00000056116	6.82551	-2.58741	1.22259	-2.11634	0.034316	0.240546	H2-T22
ENSMUSG00000106558	5.35471	-1.51878	0.717627	-2.11639	0.0343113	0.240546	Gm5552
ENSMUSG00000034341	38.2624	-1.48169	0.700391	-2.11552	0.0343859	0.24084	Wbp2
ENSMUSG00000029826	70.885	-1.64694	0.778939	-2.11434	0.0344865	0.24135	Zc3hav1
ENSMUSG00000029455	134.358	-1.24753	0.590506	-2.11264	0.0346317	0.241687	Aldh2
ENSMUSG00000041891	39.5455	1.73692	0.822277	2.11233	0.0346582	0.241687	Lman1
ENSMUSG00000064339	5650.28	-0.42715	0.202125	-2.1133	0.0345753	0.241687	mt-Rnr2
ENSMUSG00000066362	0.510993	-1.30568	0.618179	-2.11214	0.0346744	0.241687	Rps13-ps1
ENSMUSG00000083757	0.73726	-1.20852	0.572074	-2.11253	0.0346414	0.241687	Rps15a-ps4
ENSMUSG00000020361	40.8872	-1.52566	0.722639	-2.11123	0.0347527	0.241908	Hspa4
ENSMUSG00000030533	22.324	-1.93628	0.917323	-2.11079	0.03479	0.241908	Unc45a
ENSMUSG00000040414	3.03816	2.31625	1.09732	2.11082	0.0347877	0.241908	Slc25a28
ENSMUSG00000024990	23.8818	2.62359	1.2435	2.10984	0.0348726	0.242093	Rbp4
ENSMUSG00000082806	2.46111	-1.01791	0.482424	-2.10999	0.0348589	0.242093	Rpl13-ps1
ENSMUSG00000020936	19.6449	-1.73209	0.821995	-2.10717	0.0351026	0.242535	Nmt1
ENSMUSG00000024892	2.02282	1.84626	0.875645	2.10846	0.0349913	0.242535	Pcx
ENSMUSG00000028479	19.4913	2.11701	1.00448	2.10757	0.035068	0.242535	Gne
ENSMUSG00000029547	20.2817	-2.23059	1.05858	-2.10715	0.0351045	0.242535	Ints1
ENSMUSG00000034940	12.5997	1.81348	0.86035	2.10784	0.0350452	0.242535	Synrg
ENSMUSG00000046721	91.3109	-0.848518	0.402464	-2.10831	0.0350045	0.242535	Rpl14-ps1
ENSMUSG00000035203	5.93704	1.749	0.830271	2.10654	0.0351578	0.242709	Epn1
ENSMUSG00000029686	65.9291	-1.35655	0.64435	-2.1053	0.0352651	0.243256	Cul1
ENSMUSG00000004508	12.1438	-2.69466	1.28147	-2.10279	0.0354845	0.244018	Gab2
ENSMUSG00000028104	6.30198	-2.16754	1.03111	-2.10214	0.0355414	0.244018	Polr3gl
ENSMUSG00000038539	7.79383	-2.04981	0.974644	-2.10314	0.0354537	0.244018	Atf5
ENSMUSG00000060206	5.92486	2.5109	1.19447	2.1021	0.0355449	0.244018	Zfp462
ENSMUSG00000090394	70.6824	1.75338	0.834107	2.1021	0.0355446	0.244018	4930523C07Rik
ENSMUSG00000101970	6.39871	2.26276	1.07621	2.10253	0.0355065	0.244018	1810026B05Rik
ENSMUSG00000035469	3.55385	2.18202	1.03851	2.1011	0.035632	0.244422	Rcbtb1
ENSMUSG00000016256	167.03	-1.3489	0.642265	-2.10022	0.0357099	0.244569	Ctsz
ENSMUSG00000058503	14.7546	1.88181	0.89595	2.10035	0.0356977	0.244569	Fam133b
ENSMUSG00000024535	3.79587	2.52508	1.20254	2.09979	0.0357475	0.244633	Snx24
ENSMUSG00000035139	3.21634	2.04355	0.973653	2.09884	0.0358306	0.244814	Secisbp2
ENSMUSG00000106375	17.1873	2.21793	1.05671	2.0989	0.0358262	0.244814	Gm43361
ENSMUSG00000038141	1.38028	-1.52315	0.725859	-2.09841	0.0358688	0.244881	Tmem181a
ENSMUSG00000001962	34.4223	-1.89588	0.903629	-2.09807	0.0358985	0.244891	Fam50a
ENSMUSG00000071847	12.3814	2.67562	1.27622	2.09652	0.0360364	0.245638	Apcdd1
ENSMUSG00000028961	42.0745	-1.69631	0.80956	-2.09535	0.0361398	0.245762	Pgd
ENSMUSG00000036718	9.07851	2.55175	1.21778	2.09541	0.036135	0.245762	Micall2
ENSMUSG00000052920	14.3661	2.27291	1.08463	2.09557	0.03612	0.245762	Prkg1
ENSMUSG00000027425	1.81623	2.26946	1.08344	2.09469	0.0361988	0.24597	Kat14
ENSMUSG00000022533	46.6369	-1.64605	0.786363	-2.09325	0.0363273	0.246262	Atp13a3
ENSMUSG00000029249	42.6244	-2.07669	0.991997	-2.09345	0.036309	0.246262	Rest
ENSMUSG00000035824	8.92631	-2.81646	1.34513	-2.09383	0.0362754	0.246262	Tk2
ENSMUSG00000037270	127.888	-1.13263	0.541292	-2.09246	0.0363969	0.246349	4932438A13Rik
ENSMUSG00000069895	9.32002	-2.07627	0.992177	-2.09264	0.0363816	0.246349	Atxn1l
ENSMUSG00000032199	31.4088	1.80497	0.863184	2.09106	0.0365223	0.247004	Polr2m
ENSMUSG00000020593	5.88955	2.29693	1.09889	2.09022	0.0365977	0.247181	Lpin1
ENSMUSG00000030990	4.8043	2.20776	1.0566	2.0895	0.0366627	0.247181	Pgap2
ENSMUSG00000032816	16.5154	2.06625	0.988577	2.09013	0.0366062	0.247181	Igdcc4
ENSMUSG00000072941	75.4165	1.85593	0.888119	2.08973	0.0366421	0.247181	Sod3
ENSMUSG00000074483	70.2644	2.06099	0.986875	2.0884	0.0367617	0.247655	Bglap
ENSMUSG00000026127	3.41415	2.2821	1.09343	2.0871	0.0368791	0.248252	Imp4
ENSMUSG00000020770	4.93917	1.8977	0.909766	2.08592	0.0369861	0.248779	Unk
ENSMUSG00000029687	18.4682	-1.88119	0.90246	-2.08451	0.0371134	0.249441	Ezh2
ENSMUSG00000027018	16.8226	2.39244	1.14833	2.0834	0.0372149	0.249763	Hat1
ENSMUSG00000029577	32.3708	-1.65015	0.79217	-2.08308	0.0372441	0.249763	Ube3b
ENSMUSG00000062554	1.47295	-1.98015	0.950609	-2.08304	0.0372479	0.249763	Gm12751
ENSMUSG00000051548	2.40044	-1.58589	0.761462	-2.08269	0.0372791	0.249779	Gm6365
ENSMUSG00000053332	95.127	1.05371	0.506136	2.08188	0.0373539	0.250086	Gas5
ENSMUSG00000049517	1.47633	-1.3733	0.6598	-2.08138	0.0373988	0.250193	Rps23
ENSMUSG00000053754	25.2742	-1.4874	0.714794	-2.08089	0.0374443	0.250304	Chd8
ENSMUSG00000020227	7.47311	-2.39488	1.15166	-2.0795	0.0375714	0.250905	Irak3
ENSMUSG00000081886	0.585645	1.4299	0.687691	2.07927	0.0375922	0.250905	Gm6175
ENSMUSG00000019961	22.8015	-1.79429	0.863303	-2.0784	0.0376722	0.250995	Tmpo
ENSMUSG00000020899	3.8286	2.10223	1.01157	2.07818	0.0376928	0.250995	Pfas
ENSMUSG00000037949	16.0739	1.90833	0.918034	2.07871	0.0376437	0.250995	Ano10
ENSMUSG00000034595	44.6056	-1.93218	0.930341	-2.07685	0.0378155	0.251131	Ppp1r18
ENSMUSG00000044456	7.11506	-2.54865	1.2271	-2.07696	0.0378052	0.251131	Rin3
ENSMUSG00000046818	47.3191	2.1488	1.03441	2.07732	0.0377724	0.251131	Ddit4l
ENSMUSG00000071041	28.5619	-1.39159	0.670095	-2.0767	0.0378293	0.251131	Impdh2-ps
ENSMUSG00000022529	23.4214	-2.37084	1.14203	-2.07598	0.0378957	0.251328	Zfp263
ENSMUSG00000031987	15.5858	-1.99909	0.963067	-2.07575	0.0379171	0.251328	Egln1
ENSMUSG00000005698	18.3583	-1.9534	0.941894	-2.0739	0.0380882	0.251779	Ctcf
ENSMUSG00000020467	61.1523	-2.82374	1.36132	-2.07427	0.0380542	0.251779	Efemp1
ENSMUSG00000035284	15.8569	1.7934	0.864517	2.07446	0.038037	0.251779	Vps13c
ENSMUSG00000105586	2.2664	2.09907	1.0122	2.07376	0.0381016	0.251779	Gm43009
ENSMUSG00000029345	12.9643	-2.19454	1.05889	-2.07248	0.0382208	0.252374	Tfip11
ENSMUSG00000007589	33.6434	-2.25564	1.08902	-2.07125	0.0383351	0.25255	Tinf2
ENSMUSG00000014599	25.5796	-1.62996	0.786909	-2.07135	0.0383262	0.25255	Csf1
ENSMUSG00000018819	261.735	-1.36604	0.659412	-2.07161	0.0383019	0.25255	Lsp1
ENSMUSG00000015247	8.66683	2.15585	1.0418	2.06935	0.038513	0.253529	Nipsnap3b
ENSMUSG00000096173	0.902016	1.56744	0.757606	2.06894	0.0385516	0.25359	Gm3150
ENSMUSG00000042328	9.59258	-2.45798	1.18861	-2.06795	0.0386445	0.254009	Hps4
ENSMUSG00000024477	14.1562	-2.55709	1.23838	-2.06487	0.0389353	0.255188	Pggt1b
ENSMUSG00000027466	33.4465	-1.71756	0.832067	-2.06421	0.0389979	0.255188	Rbck1
ENSMUSG00000029569	11.3123	2.11414	1.02364	2.06532	0.0388931	0.255188	Tmem168
ENSMUSG00000032046	54.2206	-1.57426	0.762656	-2.06418	0.039001	0.255188	Abhd12
ENSMUSG00000079547	5.36609	2.34013	1.13338	2.06473	0.0389483	0.255188	H2-DMb1
ENSMUSG00000093402	2.71521	1.48107	0.717491	2.06423	0.0389957	0.255188	Gm18588
ENSMUSG00000001847	104.387	-1.01454	0.49189	-2.06254	0.0391564	0.255336	Rac1
ENSMUSG00000033327	40.359	-2.33566	1.13214	-2.06305	0.0391078	0.255336	Tnxb
ENSMUSG00000069601	4.2877	2.69058	1.30434	2.06278	0.0391331	0.255336	Ank3
ENSMUSG00000074971	55.2265	1.85091	0.897048	2.06334	0.0390807	0.255336	Fibin
ENSMUSG00000100347	2.25809	-1.80995	0.877603	-2.06238	0.0391713	0.255336	Gm7895
ENSMUSG00000048271	37.7704	-1.38018	0.66952	-2.06145	0.0392601	0.255723	Rbm33
ENSMUSG00000012428	32.1028	-2.83108	1.37382	-2.06073	0.0393289	0.255978	Steap4
ENSMUSG00000014313	32.4389	-0.977234	0.474439	-2.05977	0.0394207	0.256217	Cox6c
ENSMUSG00000063895	6.61964	2.09088	1.01524	2.0595	0.0394465	0.256217	Nupl1
ENSMUSG00000071662	9.1306	2.10103	1.02021	2.05941	0.0394545	0.256217	Polr2g
ENSMUSG00000024176	10.7246	2.60116	1.26465	2.05683	0.0397027	0.257253	Sox8
ENSMUSG00000041733	19.0216	-2.23853	1.0883	-2.05691	0.0396952	0.257253	Coq5
ENSMUSG00000100441	2.70593	-0.953004	0.463337	-2.05682	0.0397032	0.257253	Gm7266
ENSMUSG00000039887	16.1836	2.2249	1.08207	2.05614	0.0397686	0.257484	Alg14
ENSMUSG00000020473	69.0726	1.56079	0.759395	2.0553	0.0398496	0.257692	Aebp1
ENSMUSG00000022562	17.2396	2.12252	1.03276	2.05519	0.0398603	0.257692	Oplah
ENSMUSG00000021614	19.317	2.59251	1.26165	2.05485	0.0398938	0.257716	Vcan
ENSMUSG00000019794	27.7767	-1.85026	0.900866	-2.05387	0.0399885	0.25772	Katna1
ENSMUSG00000035164	1.89514	2.25943	1.10043	2.05322	0.0400508	0.25772	Zc3h12c
ENSMUSG00000037062	79.7929	-1.3	0.633041	-2.05357	0.0400169	0.25772	Sh3glb1
ENSMUSG00000038400	45.4307	1.3956	0.679328	2.05438	0.0399388	0.25772	Pmepa1
ENSMUSG00000052534	20.3396	-1.71708	0.836379	-2.05299	0.0400732	0.25772	Pbx1
ENSMUSG00000054309	12.034	1.90389	0.927201	2.05338	0.040036	0.25772	Cpsf3
ENSMUSG00000085917	0.659098	-1.57211	0.76621	-2.0518	0.0401893	0.258274	Gm15899
ENSMUSG00000020828	4.69925	2.3036	1.12413	2.04923	0.0404394	0.258728	Pld2
ENSMUSG00000024339	27.4123	-2.2568	1.10114	-2.0495	0.0404132	0.258728	Tap2
ENSMUSG00000028271	12.9541	2.15248	1.04993	2.05012	0.0403525	0.258728	Gtf2b
ENSMUSG00000041570	37.7673	1.30064	0.634341	2.05038	0.0403274	0.258728	Camsap2
ENSMUSG00000046934	1.91443	-1.79861	0.877165	-2.05047	0.0403181	0.258728	Csl
ENSMUSG00000068699	15.0815	-3.28931	1.60504	-2.04936	0.0404265	0.258728	Flnc
ENSMUSG00000020074	27.8453	-1.45565	0.710759	-2.04803	0.0405575	0.259292	Ccar1
ENSMUSG00000026751	1.80027	-0.799461	0.390646	-2.04651	0.0407062	0.259811	Nr5a1
ENSMUSG00000049892	49.3061	-2.16634	1.05861	-2.0464	0.0407171	0.259811	Rasd1
ENSMUSG00000055723	23.4354	1.97089	0.963215	2.04616	0.0407404	0.259811	Rras2
ENSMUSG00000061175	11.1342	1.98771	0.971519	2.04598	0.0407587	0.259811	Fnip2
ENSMUSG00000030083	7.80112	-2.3732	1.16042	-2.04513	0.0408425	0.259962	Abtb1
ENSMUSG00000059323	57.5087	-1.53624	0.751107	-2.0453	0.0408256	0.259962	Tonsl
ENSMUSG00000028923	31.1326	-1.83965	0.900152	-2.04371	0.0409819	0.260657	Necap2
ENSMUSG00000023571	10.3296	2.24976	1.10135	2.04274	0.0410783	0.260695	C1qtnf12
ENSMUSG00000040725	19.8747	-1.25931	0.616426	-2.04292	0.04106	0.260695	Hnrnpul1
ENSMUSG00000047888	59.0731	-1.08678	0.531959	-2.04297	0.0410554	0.260695	Tnrc6b
ENSMUSG00000017776	48.962	-1.4105	0.690879	-2.04159	0.0411918	0.261224	Crk
ENSMUSG00000029761	90.7289	-1.3813	0.676881	-2.04069	0.0412815	0.261575	Cald1
ENSMUSG00000095597	3.94021	-0.893166	0.437734	-2.04043	0.0413077	0.261575	Gm6472
ENSMUSG00000026457	137.536	-1.32637	0.650352	-2.03947	0.0414034	0.261798	Adipor1
ENSMUSG00000027274	16.0034	-2.40898	1.18101	-2.03976	0.0413744	0.261798	Mkks
ENSMUSG00000006276	10.6641	2.02864	0.996756	2.03525	0.0418261	0.263699	Eps15l1
ENSMUSG00000024247	20.9076	1.46644	0.720321	2.03582	0.0417689	0.263699	Pkdcc
ENSMUSG00000035783	13.2285	-2.42282	1.19032	-2.03544	0.0418071	0.263699	Acta2
ENSMUSG00000039988	14.0864	1.54988	0.761467	2.03539	0.0418118	0.263699	Ankrd13c
ENSMUSG00000092274	4096.23	-1.0487	0.51584	-2.03299	0.0420537	0.264748	Neat1
ENSMUSG00000107369	22.5146	-2.04909	1.00778	-2.03326	0.042026	0.264748	Gstm2-ps1
ENSMUSG00000040746	65.6169	-1.50268	0.7394	-2.0323	0.0421237	0.264974	Rnf167
ENSMUSG00000051256	14.7951	2.66539	1.31169	2.03203	0.0421508	0.264974	Jagn1
ENSMUSG00000087687	2.52149	-1.50654	0.741793	-2.03094	0.0422608	0.265473	Pet100
ENSMUSG00000052593	21.0018	-1.82323	0.898296	-2.02965	0.0423918	0.266103	Adam17
ENSMUSG00000024781	15.5765	-2.46573	1.21566	-2.02831	0.0425287	0.266768	Lipa
ENSMUSG00000020689	3.59111	-1.82758	0.901454	-2.02737	0.0426245	0.267175	Itgb3
ENSMUSG00000020376	44.3702	-1.50521	0.742912	-2.02609	0.0427556	0.267593	Rnf130
ENSMUSG00000034731	3.07409	2.17053	1.07121	2.02624	0.0427402	0.267593	Dgkh
ENSMUSG00000078480	4.64882	1.60044	0.790021	2.02581	0.0427839	0.267593	Mrpl48-ps
ENSMUSG00000020929	8.66371	1.65819	0.818731	2.02531	0.0428351	0.267687	Eftud2
ENSMUSG00000061028	9.51534	-2.08627	1.03022	-2.02506	0.0428608	0.267687	Clasrp
ENSMUSG00000075602	12.8124	-1.96648	0.971359	-2.02446	0.0429228	0.26788	Ly6a
ENSMUSG00000050295	67.0222	1.25923	0.622447	2.02303	0.0430698	0.26841	Foxc1
ENSMUSG00000089872	7.07882	-2.15529	1.0653	-2.02318	0.0430545	0.26841	Rps6kc1
ENSMUSG00000001467	62.0593	1.85004	0.914675	2.02262	0.0431122	0.268481	Cyp51
ENSMUSG00000071176	7.74468	2.21679	1.09624	2.02217	0.0431589	0.268579	Arhgef10
ENSMUSG00000019975	24.8529	1.43711	0.710889	2.02156	0.0432214	0.268774	Ikbip
ENSMUSG00000032802	232.816	1.78925	0.885466	2.02069	0.0433118	0.268807	Srxn1
ENSMUSG00000073563	13.4932	-1.62492	0.804172	-2.02061	0.0433199	0.268807	Csnk1g3
ENSMUSG00000089661	29.8211	2.00621	0.992829	2.0207	0.0433107	0.268807	Mia
ENSMUSG00000020747	10.5398	-1.65703	0.8207	-2.01904	0.0434828	0.269504	Tmem94
ENSMUSG00000063316	2.83097	1.68937	0.836763	2.01893	0.0434945	0.269504	Rpl27
ENSMUSG00000032911	185.033	1.39665	0.691916	2.01852	0.0435367	0.269572	Cspg4
ENSMUSG00000053617	40.1929	1.3856	0.686668	2.01786	0.0436059	0.269808	Sh3pxd2a
ENSMUSG00000027088	10.2612	-2.57464	1.27785	-2.01482	0.0439235	0.270997	Phospho2
ENSMUSG00000028381	23.4145	-1.71221	0.849457	-2.01566	0.0438358	0.270997	Ugcg
ENSMUSG00000075609	1.07835	-1.72381	0.855514	-2.01494	0.0439107	0.270997	Gm7935
ENSMUSG00000083705	4.64148	-0.746685	0.370576	-2.01493	0.0439117	0.270997	Gm8624
ENSMUSG00000033294	8.87848	2.03818	1.01186	2.0143	0.0439781	0.271141	Noc4l
ENSMUSG00000039377	3.50837	2.1466	1.06588	2.01393	0.0440164	0.271184	Hlx
ENSMUSG00000044715	3.92854	2.36319	1.17369	2.01347	0.0440647	0.271288	Gskip
ENSMUSG00000033813	4.45756	-1.28974	0.640679	-2.01309	0.0441055	0.271346	Tcea1
ENSMUSG00000021916	30.7304	1.78469	0.886992	2.01207	0.0442124	0.271643	Glt8d1
ENSMUSG00000024218	16.6251	-1.96229	0.97528	-2.01203	0.0442166	0.271643	Taf11
ENSMUSG00000034083	14.0703	-2.2062	1.09682	-2.01145	0.0442782	0.271829	Ccdc174
ENSMUSG00000091952	0.518914	-1.79425	0.892616	-2.0101	0.0444207	0.27251	Gm17709
ENSMUSG00000083327	20.5554	1.40137	0.697452	2.00927	0.044509	0.272858	Vcp-rs
ENSMUSG00000016520	4.25763	2.34413	1.1675	2.00783	0.0446614	0.273598	Lnx2
ENSMUSG00000028521	16.5344	1.67104	0.832955	2.00615	0.0448399	0.274497	Slc35d1
ENSMUSG00000009927	1.75259	-0.951528	0.47439	-2.00579	0.0448785	0.274539	Rps25
ENSMUSG00000001995	3.52994	2.52015	1.25764	2.00387	0.045084	0.274825	Sipa1l2
ENSMUSG00000031441	37.2093	1.31875	0.658065	2.00398	0.0450719	0.274825	Atp11a
ENSMUSG00000031626	25.6899	-1.78107	0.888316	-2.00499	0.0449638	0.274825	Sorbs2
ENSMUSG00000054196	23.4043	2.52431	1.2595	2.00421	0.0450475	0.274825	Cthrc1
ENSMUSG00000061288	22.9037	-1.95104	0.973272	-2.00462	0.0450038	0.274825	Taok3
ENSMUSG00000046841	92.6221	1.29645	0.64718	2.00323	0.0451528	0.275051	Ckap4
ENSMUSG00000023456	117.48	-1.35395	0.67643	-2.00161	0.0453268	0.275916	Tpi1
ENSMUSG00000021431	7.38683	1.83436	0.917259	1.99983	0.0455186	0.276694	Snrnp48
ENSMUSG00000034621	22.5737	-1.48154	0.740728	-2.00011	0.0454885	0.276694	Gpatch8
ENSMUSG00000038696	6.22589	1.75713	0.878861	1.99933	0.0455731	0.276831	Mapkap1
ENSMUSG00000070572	1.84769	1.27795	0.639342	1.99885	0.0456245	0.276949	Trmt112-ps2
ENSMUSG00000028568	4.76277	-1.84502	0.923577	-1.99769	0.0457506	0.277325	Btf3l4
ENSMUSG00000035247	79.4385	-1.24375	0.622559	-1.9978	0.0457381	0.277325	Hectd1
ENSMUSG00000034765	146.918	-1.51662	0.759653	-1.99647	0.0458827	0.277931	Dusp5
ENSMUSG00000014846	110.527	-2.5561	1.2818	-1.99415	0.046136	0.278005	Tppp3
ENSMUSG00000025404	27.569	-1.23416	0.618847	-1.99429	0.0461205	0.278005	R3hdm2
ENSMUSG00000026158	14.0654	-2.21625	1.11179	-1.99342	0.0462158	0.278005	Ogfrl1
ENSMUSG00000027642	121.053	1.18491	0.594459	1.99326	0.0462328	0.278005	Rpn2
ENSMUSG00000031309	18.6658	1.32038	0.662556	1.99285	0.0462776	0.278005	Rps6ka3
ENSMUSG00000034321	3.37411	-2.20917	1.10782	-1.99416	0.0461348	0.278005	Exosc1
ENSMUSG00000036402	33.4494	-1.40776	0.705886	-1.99432	0.0461172	0.278005	Gng12
ENSMUSG00000047731	15.9012	-1.96429	0.985333	-1.99353	0.0462031	0.278005	Wbp1l
ENSMUSG00000061232	162.381	-1.00228	0.502945	-1.99282	0.0462806	0.278005	H2-K1
ENSMUSG00000064397	0.247182	-1.11519	0.559591	-1.99287	0.0462753	0.278005	Gm23624
ENSMUSG00000071369	48.7016	-1.67979	0.842332	-1.99422	0.0461282	0.278005	Map3k5
ENSMUSG00000080944	0.81095	-1.28536	0.644763	-1.99354	0.0462021	0.278005	Gm12967
ENSMUSG00000022629	18.6845	1.92119	0.964331	1.99225	0.0463439	0.278192	Kif21a
ENSMUSG00000031402	22.7248	-2.01548	1.01203	-1.99152	0.0464233	0.278306	Mpp1
ENSMUSG00000059923	24.6044	-1.55201	0.779323	-1.99149	0.0464275	0.278306	Grb2
ENSMUSG00000069020	10.2223	-2.62683	1.31922	-1.9912	0.0464594	0.278306	Urm1
ENSMUSG00000038855	53.1563	-1.48965	0.748598	-1.98993	0.0465992	0.278461	Itpkb
ENSMUSG00000039697	5.74102	-2.40538	1.20904	-1.9895	0.0466463	0.278461	Ncoa7
ENSMUSG00000058569	43.6351	1.24504	0.625799	1.98952	0.0466442	0.278461	Tmed9
ENSMUSG00000082534	1.28676	-1.83622	0.922548	-1.99038	0.0465487	0.278461	Gm13712
ENSMUSG00000107286	7.33467	2.13229	1.07177	1.9895	0.0466458	0.278461	Gm43788
ENSMUSG00000032369	5.27317	2.34971	1.18164	1.98851	0.0467552	0.278919	Plscr1
ENSMUSG00000052192	10.3595	-0.819949	0.412692	-1.98683	0.0469411	0.279835	Gm5963
ENSMUSG00000021670	27.5224	1.92534	0.969704	1.98549	0.0470903	0.280151	Hmgcr
ENSMUSG00000049477	1.23511	-1.58257	0.797093	-1.98543	0.0470966	0.280151	Gm8508
ENSMUSG00000056121	15.5636	-2.24432	1.13009	-1.98596	0.0470377	0.280151	Fez2
ENSMUSG00000102869	2.87164	-1.31125	0.660516	-1.98519	0.0471236	0.280151	2900097C17Rik
ENSMUSG00000006369	64.8907	2.43085	1.2259	1.98291	0.0473776	0.281081	Fbln1
ENSMUSG00000036299	34.068	-1.57003	0.791753	-1.98298	0.0473701	0.281081	BC031181
ENSMUSG00000094530	22.4092	1.02878	0.518732	1.98326	0.0473388	0.281081	Gm21399
ENSMUSG00000033916	42.8688	-1.2753	0.643475	-1.9819	0.0474906	0.281405	Chmp2a
ENSMUSG00000035206	8.12684	1.89821	0.957802	1.98184	0.0474973	0.281405	Sppl2b
ENSMUSG00000037622	6.42988	-2.03213	1.02602	-1.9806	0.047636	0.282034	Wdtc1
ENSMUSG00000027646	3.94023	-1.93826	0.978852	-1.98014	0.0476883	0.282112	Src
ENSMUSG00000032024	29.7882	1.7486	0.883172	1.9799	0.0477143	0.282112	Clmp
ENSMUSG00000038074	24.4976	1.78035	0.899441	1.9794	0.0477714	0.282256	Fkbp14
ENSMUSG00000029714	5.37077	1.57099	0.793934	1.97874	0.0478452	0.282306	Gigyf1
ENSMUSG00000081775	8.36344	-0.994032	0.50235	-1.97876	0.0478428	0.282306	Gm12420
ENSMUSG00000025423	15.4111	1.51755	0.767358	1.97763	0.0479704	0.282852	Pias2
ENSMUSG00000007659	36.5427	-1.69874	0.859184	-1.97716	0.0480235	0.282973	Bcl2l1
ENSMUSG00000034353	30.3572	-2.78729	1.41102	-1.97537	0.0482257	0.28397	Ramp1
ENSMUSG00000027284	9.69869	-2.28617	1.15857	-1.97328	0.0484641	0.284792	Cdan1
ENSMUSG00000046574	8.37994	-1.9764	1.00155	-1.97333	0.0484582	0.284792	Prr12
ENSMUSG00000056493	24.0697	-1.49784	0.758926	-1.97363	0.0484244	0.284792	Foxk1
ENSMUSG00000033545	9.75655	1.82633	0.925745	1.97282	0.0485155	0.284901	Znrf1
ENSMUSG00000021583	15.6604	-2.23674	1.13403	-1.97238	0.0485659	0.285004	Erap1
ENSMUSG00000026880	17.4092	-2.30789	1.17049	-1.97173	0.0486405	0.285201	Stom
ENSMUSG00000035674	10.1115	-1.34615	0.682802	-1.97151	0.0486656	0.285201	Ndufa3
ENSMUSG00000031007	62.825	-1.43968	0.730524	-1.97075	0.0487527	0.285518	Atp6ap2
ENSMUSG00000037876	210.252	-0.934559	0.474362	-1.97014	0.0488223	0.285733	Jmjd1c
ENSMUSG00000033014	16.2349	-1.82458	0.926335	-1.96968	0.0488752	0.285849	Trim33
ENSMUSG00000020903	5.50581	-2.20425	1.11933	-1.96926	0.0489228	0.285934	Stx8
ENSMUSG00000083767	1.87762	-1.894	0.961941	-1.96894	0.0489603	0.28596	Gm11405
ENSMUSG00000061878	27.161	2.05073	1.04177	1.96851	0.049009	0.286051	Sphk1
ENSMUSG00000005057	44.1986	-2.74305	1.39406	-1.96767	0.0491063	0.286426	Sh2b2
ENSMUSG00000027004	48.551	2.73697	1.39156	1.96683	0.0492026	0.286794	Frzb
ENSMUSG00000030189	71.5395	-1.18461	0.603099	-1.96421	0.0495056	0.288366	Ybx3
ENSMUSG00000018848	6.62066	2.2948	1.16942	1.96233	0.0497238	0.289266	Rars
ENSMUSG00000033207	7.53811	-2.51032	1.27927	-1.9623	0.049727	0.289266	Mamdc2
ENSMUSG00000020525	6.09927	-1.94367	0.990976	-1.96137	0.0498359	0.289584	Ppm1d
ENSMUSG00000021468	20.1917	-1.7297	0.881934	-1.96126	0.0498487	0.289584	Sptlc1
ENSMUSG00000037722	8.74449	-2.24316	1.14433	-1.96025	0.0499667	0.289686	Gnpnat1
ENSMUSG00000046186	72.7019	1.43852	0.733827	1.9603	0.0499609	0.289686	Cd109
ENSMUSG00000093017	2.94988	-1.79159	0.913877	-1.96043	0.0499452	0.289686	Mir5108
ENSMUSG00000028902	17.7583	1.98092	1.01077	1.95981	0.0500182	0.289791	Sf3a3
ENSMUSG00000025184	19.5529	-2.11545	1.0804	-1.95802	0.0502274	0.290031	R3hcc1l
ENSMUSG00000038324	76.1258	-1.23668	0.631499	-1.95833	0.0501912	0.290031	Trpc4ap
ENSMUSG00000043391	12.4119	1.77638	0.906841	1.95887	0.0501278	0.290031	2510009E07Rik
ENSMUSG00000057541	8.61256	-2.31737	1.18336	-1.95829	0.0501963	0.290031	Pus7
ENSMUSG00000058325	32.3168	1.24717	0.636694	1.95883	0.0501332	0.290031	Dock1
ENSMUSG00000005958	8.19588	1.93598	0.99049	1.95457	0.0506337	0.29044	Ephb3
ENSMUSG00000008305	9.38402	1.71976	0.879945	1.95439	0.0506548	0.29044	Tle1
ENSMUSG00000011832	3.97976	1.96393	1.00493	1.95429	0.0506674	0.29044	Evi5l
ENSMUSG00000022450	25.7934	-1.08285	0.55333	-1.95698	0.0503501	0.29044	Ndufa6
ENSMUSG00000025407	4.02634	2.16505	1.10718	1.95547	0.0505274	0.29044	Gli1
ENSMUSG00000026051	176.053	1.66145	0.849328	1.95619	0.0504423	0.29044	1500015O10Rik
ENSMUSG00000051007	3.08975	2.26071	1.15538	1.95669	0.0503843	0.29044	Gatd1
ENSMUSG00000055128	9.82793	1.90091	0.971956	1.95576	0.0504939	0.29044	Cgrrf1
ENSMUSG00000072501	40.7483	-1.54237	0.788999	-1.95484	0.0506019	0.29044	Phf20l1
ENSMUSG00000101878	10.1501	-1.21629	0.621739	-1.95628	0.0504324	0.29044	Gm8203
ENSMUSG00000106133	5.69632	-1.34855	0.689832	-1.9549	0.0505954	0.29044	Gm3724
ENSMUSG00000038025	17.813	-1.32998	0.680923	-1.9532	0.0507959	0.290983	Phf2
ENSMUSG00000005683	32.2226	-1.79436	0.919016	-1.95248	0.0508815	0.291281	Cs
ENSMUSG00000091971	76.1361	-1.73169	0.887076	-1.95214	0.050922	0.29132	Hspa1a
ENSMUSG00000026082	17.5836	-1.59588	0.817671	-1.95174	0.0509693	0.291371	Rev1
ENSMUSG00000039911	97.8862	1.61661	0.828397	1.95149	0.0509983	0.291371	Spsb1
ENSMUSG00000047409	54.7158	1.35243	0.693645	1.94975	0.0512057	0.292221	Ctdspl
ENSMUSG00000052406	15.0923	-2.05905	1.0561	-1.94968	0.0512147	0.292221	Rexo4
ENSMUSG00000019088	16.5806	-2.17749	1.11738	-1.94874	0.0513264	0.292665	Dnase1l1
ENSMUSG00000006289	16.0638	-1.78587	0.917042	-1.94742	0.0514839	0.293177	Osgep
ENSMUSG00000034610	15.5545	-1.59937	0.821231	-1.94753	0.0514709	0.293177	Zcchc11
ENSMUSG00000026853	8.89288	-2.42718	1.24666	-1.94695	0.0515405	0.293306	Crat
ENSMUSG00000024085	6.61546	1.88808	0.96992	1.94663	0.0515787	0.293331	Man2a1
ENSMUSG00000002602	57.6325	-1.95687	1.00751	-1.94229	0.0521021	0.295918	Axl
ENSMUSG00000092607	8.03143	2.08529	1.07359	1.94235	0.0520952	0.295918	Scnm1
ENSMUSG00000032557	20.4722	1.6492	0.849265	1.94191	0.0521478	0.295983	Uba5
ENSMUSG00000059461	1.53647	-1.08004	0.556321	-1.9414	0.0522092	0.296137	Gm7331
ENSMUSG00000026987	57.1641	-1.18757	0.611819	-1.94105	0.0522525	0.296189	Baz2b
ENSMUSG00000030067	46.0483	1.40367	0.723564	1.93994	0.0523865	0.296409	Foxp1
ENSMUSG00000030199	30.0063	-1.65463	0.852941	-1.93991	0.0523906	0.296409	Etv6
ENSMUSG00000045948	5.37527	2.48111	1.279	1.93988	0.0523941	0.296409	Mrps12
ENSMUSG00000084208	1.02673	-1.41041	0.72717	-1.93959	0.0524296	0.296416	Gm12792
ENSMUSG00000025979	26.6167	-1.60434	0.82757	-1.93861	0.0525483	0.296893	Mob4
ENSMUSG00000020409	21.0815	-2.23004	1.15113	-1.93726	0.0527139	0.297634	Slu7
ENSMUSG00000100018	3.50473	-1.73053	0.893856	-1.93603	0.0528638	0.298286	Gm7776
ENSMUSG00000024544	33.2289	1.66615	0.861094	1.93492	0.0529997	0.298468	Ldlrad4
ENSMUSG00000042032	24.5065	-1.67235	0.864242	-1.93505	0.052984	0.298468	Mat2b
ENSMUSG00000061718	30.6222	2.134	1.10287	1.93495	0.0529968	0.298468	Ppp1r1b
ENSMUSG00000061455	5.08682	-2.1982	1.1364	-1.93435	0.0530697	0.298668	Stx17
ENSMUSG00000052698	15.897	1.78554	0.923443	1.93357	0.0531663	0.298823	Tln2
ENSMUSG00000053436	29.7064	-1.6956	0.876908	-1.93361	0.0531612	0.298823	Mapk14
ENSMUSG00000068284	21.5753	-1.80206	0.932163	-1.9332	0.0532111	0.298881	Usf3
ENSMUSG00000038954	5.20266	2.25248	1.16623	1.93143	0.0534297	0.299914	Supt3
ENSMUSG00000022982	16.6959	-1.27213	0.658764	-1.93109	0.0534722	0.299957	Sod1
ENSMUSG00000086567	1.45263	-1.1823	0.612369	-1.9307	0.0535203	0.300033	Gm2830
ENSMUSG00000014426	15.4171	1.80953	0.937892	1.92936	0.0536866	0.300575	Map3k4
ENSMUSG00000060475	24.0728	-0.584483	0.302936	-1.92939	0.053682	0.300575	Wtap
ENSMUSG00000020946	26.8575	-1.75922	0.912809	-1.92726	0.0539473	0.301644	Gosr2
ENSMUSG00000024002	56.277	-1.02106	0.529769	-1.92736	0.0539346	0.301644	Brd4
ENSMUSG00000028691	56.6536	1.02245	0.530656	1.92677	0.0540079	0.301788	Prdx1
ENSMUSG00000022558	12.6456	-1.73283	0.90044	-1.92442	0.0543017	0.303234	Mroh1
ENSMUSG00000032497	37.353	-1.31374	0.68285	-1.9239	0.054367	0.303403	Lrrfip2
ENSMUSG00000017418	57.7899	-1.43714	0.748341	-1.92044	0.0548026	0.304459	Arl5b
ENSMUSG00000021193	25.5738	-1.67885	0.874095	-1.92067	0.0547727	0.304459	Pitrm1
ENSMUSG00000022453	34.2185	1.31948	0.686823	1.92114	0.0547141	0.304459	Naga
ENSMUSG00000027015	5.68765	2.20297	1.14669	1.92115	0.0547124	0.304459	Cybrd1
ENSMUSG00000045136	2.0749	1.94337	1.01122	1.92182	0.054629	0.304459	Tubb2b
ENSMUSG00000079055	29.1897	1.95823	1.0195	1.92078	0.0547599	0.304459	Slc8a3
ENSMUSG00000098104	13.1685	-1.43703	0.74789	-1.92145	0.0546748	0.304459	Gm6085
ENSMUSG00000028890	12.2671	-1.68238	0.876478	-1.91948	0.0549235	0.304934	Mtf1
ENSMUSG00000090210	33.0467	1.45753	0.759993	1.91782	0.0551335	0.305904	Itga10
ENSMUSG00000106106	45721.7	-0.35679	0.186101	-1.91718	0.0552147	0.306158	CT010467.1
ENSMUSG00000044609	4.35871	-0.856019	0.446633	-1.9166	0.0552883	0.30637	Gm9294
ENSMUSG00000040699	40.9535	-2.17886	1.13702	-1.91629	0.0553287	0.306397	Limd2
ENSMUSG00000002326	14.9322	-1.74595	0.912084	-1.91424	0.0555893	0.307055	Gmpr2
ENSMUSG00000020564	13.9541	-1.83986	0.961017	-1.91449	0.0555578	0.307055	Atxn7l1
ENSMUSG00000021536	27.4972	-1.62496	0.84854	-1.91501	0.0554918	0.307055	Adcy2
ENSMUSG00000082274	3.9547	1.76017	0.91931	1.91467	0.0555348	0.307055	Gm14026
ENSMUSG00000019943	114.005	-1.08383	0.566416	-1.91348	0.0556863	0.307394	Atp2b1
ENSMUSG00000037029	9.79004	2.01781	1.05484	1.9129	0.0557608	0.307609	Zfp146
ENSMUSG00000000531	15.5364	-1.69538	0.886732	-1.91194	0.0558839	0.307861	Grasp
ENSMUSG00000021186	30.6892	-1.5269	0.798709	-1.91171	0.0559132	0.307861	Fbln5
ENSMUSG00000030659	30.5598	1.80778	0.945415	1.91216	0.0558558	0.307861	Nucb2
ENSMUSG00000024066	51.5607	-2.38788	1.25069	-1.90925	0.0562304	0.30941	Xdh
ENSMUSG00000058013	58.8167	-1.25986	0.660516	-1.90738	0.0564713	0.310538	Sept11
ENSMUSG00000027835	7.7544	-1.49143	0.782368	-1.9063	0.0566107	0.311107	Pdcd10
ENSMUSG00000021282	115.55	-1.04809	0.550642	-1.9034	0.0569882	0.311828	Eif5
ENSMUSG00000025278	97.5674	1.29782	0.681812	1.90349	0.0569764	0.311828	Flnb
ENSMUSG00000028111	109.698	1.51348	0.794679	1.90452	0.056843	0.311828	Ctsk
ENSMUSG00000031755	22.9082	-2.83388	1.48888	-1.90336	0.0569942	0.311828	Bbs2
ENSMUSG00000037868	92.2353	-1.68945	0.887398	-1.90383	0.0569327	0.311828	Egr2
ENSMUSG00000038671	11.8717	-1.91778	1.00707	-1.90432	0.0568683	0.311828	Arfrp1
ENSMUSG00000041540	44.1177	1.50215	0.78892	1.90405	0.0569033	0.311828	Sox5
ENSMUSG00000016252	29.7335	-0.992	0.521757	-1.90127	0.0572667	0.31284	Atp5e
ENSMUSG00000027778	1.77643	1.91442	1.00679	1.90152	0.0572337	0.31284	Ift80
ENSMUSG00000031095	9.2014	1.9403	1.02062	1.90111	0.0572877	0.31284	Cul4b
ENSMUSG00000056666	13.0051	-2.08874	1.09918	-1.90028	0.057397	0.313239	Retsat
ENSMUSG00000057530	45.2711	-1.60934	0.847236	-1.89952	0.0574966	0.313585	Ece1
ENSMUSG00000046096	10.9726	-1.84021	0.968921	-1.89923	0.0575339	0.31359	BC030336
ENSMUSG00000003948	4.91445	-2.2477	1.18408	-1.89827	0.0576599	0.313955	Mmd
ENSMUSG00000030768	7.86293	2.00356	1.0556	1.89802	0.0576932	0.313955	Disp1
ENSMUSG00000034158	64.435	-1.02303	0.539036	-1.8979	0.0577097	0.313955	Lrrc58
ENSMUSG00000026797	21.2264	1.58972	0.837983	1.89707	0.0578181	0.314347	Stxbp1
ENSMUSG00000020719	387.411	-0.696794	0.367471	-1.89619	0.057935	0.314785	Ddx5
ENSMUSG00000056268	20.2053	1.55817	0.821981	1.89563	0.0580094	0.314991	Dennd1b
ENSMUSG00000042572	10.7017	-1.88856	0.996633	-1.89494	0.0581004	0.315288	Ube2q1
ENSMUSG00000027381	56.8945	-1.5842	0.836711	-1.89336	0.0583097	0.316027	Bcl2l11
ENSMUSG00000039206	2.76639	-2.24315	1.18467	-1.89348	0.0582944	0.316027	Daglb
ENSMUSG00000000320	5.17092	-1.44069	0.761647	-1.89154	0.0585522	0.317143	Alox12
ENSMUSG00000079557	18.8976	-1.68865	0.893348	-1.89025	0.0587243	0.317478	Marchf2
ENSMUSG00000028854	24.8506	1.34651	0.712331	1.89029	0.0587188	0.317478	Slc9a1
ENSMUSG00000034714	6.00083	2.11106	1.11669	1.89046	0.0586966	0.317478	Ttyh2
ENSMUSG00000038095	110.234	-1.19265	0.631069	-1.8899	0.0587719	0.317537	Sbno1
ENSMUSG00000003235	13.1434	1.91555	1.01466	1.88787	0.0590431	0.317541	Eif2b5
ENSMUSG00000026229	64.3689	-1.22032	0.646374	-1.88795	0.0590323	0.317541	Psmd1
ENSMUSG00000030691	20.5056	-1.46022	0.772822	-1.88946	0.0588302	0.317541	Fchsd2
ENSMUSG00000031715	18.6948	-1.264	0.669455	-1.8881	0.0590119	0.317541	Smarca5
ENSMUSG00000032329	20.382	-1.74694	0.924668	-1.88926	0.0588566	0.317541	Hmg20a
ENSMUSG00000038880	1.92657	2.00327	1.06067	1.88868	0.0589347	0.317541	Mrps34
ENSMUSG00000039968	4.25636	1.50409	0.796682	1.88794	0.0590336	0.317541	Rsbn1l
ENSMUSG00000040268	17.9531	1.66983	0.884587	1.8877	0.0590664	0.317541	Plekha1
ENSMUSG00000010517	17.0669	1.52055	0.805865	1.88686	0.0591791	0.317753	Faf1
ENSMUSG00000024182	11.9342	-1.76854	0.93724	-1.88696	0.0591657	0.317753	Axin1
ENSMUSG00000031149	21.8036	1.60446	0.850881	1.88565	0.0593419	0.318231	Praf2
ENSMUSG00000091512	11.9751	-1.57381	0.834547	-1.88582	0.0593188	0.318231	Lamtor3
ENSMUSG00000027406	51.9331	-1.30684	0.693981	-1.88311	0.0596856	0.319482	Idh3b
ENSMUSG00000034858	12.8447	-1.65992	0.881607	-1.88283	0.0597228	0.319482	Fam214a
ENSMUSG00000037419	20.1977	1.99688	1.0603	1.88332	0.0596571	0.319482	Endod1
ENSMUSG00000058126	22.6203	-1.15437	0.613019	-1.88308	0.0596893	0.319482	Tpm3-rs7
ENSMUSG00000015806	15.7761	-2.15213	1.14427	-1.88079	0.0600001	0.320718	Qdpr
ENSMUSG00000025647	63.3514	-1.4507	0.77163	-1.88004	0.0601022	0.320718	Shisa5
ENSMUSG00000039159	16.4495	-1.24747	0.663382	-1.88048	0.0600431	0.320718	Ube2h
ENSMUSG00000087291	4.19777	2.13356	1.13484	1.88005	0.060101	0.320718	Gm11946
ENSMUSG00000019179	82.3563	-1.24219	0.661126	-1.8789	0.0602576	0.320866	Mdh2
ENSMUSG00000032097	87.5207	-1.01882	0.542196	-1.87905	0.0602372	0.320866	Ddx6
ENSMUSG00000055210	0.946972	2.07323	1.10359	1.87862	0.0602969	0.320866	Foxd2
ENSMUSG00000056999	8.98806	1.78432	0.949379	1.87946	0.0601823	0.320866	Ide
ENSMUSG00000101449	1.13568	1.75846	0.936109	1.87848	0.0603154	0.320866	Gm17791
ENSMUSG00000028433	18.7541	1.64951	0.878372	1.87791	0.0603931	0.321082	Ubap2
ENSMUSG00000026668	152.956	2.02356	1.07789	1.87733	0.0604733	0.321144	Ucma
ENSMUSG00000028681	4.88608	-2.29223	1.22114	-1.87712	0.0605018	0.321144	Ptch2
ENSMUSG00000034258	7.22292	1.98133	1.05557	1.87701	0.0605162	0.321144	Flvcr2
ENSMUSG00000050721	49.5831	-1.65448	0.881621	-1.87663	0.0605684	0.321224	Plekho2
ENSMUSG00000106099	3.33793	2.37868	1.26836	1.87539	0.0607384	0.321929	Gm42664
ENSMUSG00000025279	4.42379	-1.38402	0.738338	-1.8745	0.060861	0.322283	Dnase1l3
ENSMUSG00000025607	4.15704	2.08497	1.11236	1.87437	0.0608798	0.322283	Copg2
ENSMUSG00000026077	2.07557	1.92949	1.02972	1.87379	0.0609593	0.322309	Npas2
ENSMUSG00000038708	25.6752	-1.283	0.684626	-1.87401	0.0609292	0.322309	Golga4
ENSMUSG00000026223	149.749	0.97693	0.521581	1.87302	0.0610658	0.322374	Itm2c
ENSMUSG00000028837	22.8529	1.34712	0.719065	1.87343	0.0610093	0.322374	Psmb2
ENSMUSG00000029056	9.40945	-2.10222	1.12244	-1.87289	0.0610833	0.322374	Pank4
ENSMUSG00000042042	33.1698	-1.48959	0.795614	-1.87226	0.0611709	0.322639	Csgalnact2
ENSMUSG00000021000	28.04	-1.43008	0.764418	-1.87081	0.061371	0.322711	Mia2
ENSMUSG00000038212	13.0756	-1.68784	0.901934	-1.87136	0.0612952	0.322711	Mfsd14b
ENSMUSG00000040407	54.2558	-1.22011	0.652036	-1.87122	0.0613139	0.322711	Akap9
ENSMUSG00000055413	1.33008	-1.50803	0.806044	-1.8709	0.0613583	0.322711	H2-Q5
ENSMUSG00000083367	2.34177	1.51059	0.807094	1.87165	0.0612554	0.322711	Gm8806
ENSMUSG00000042712	40.5128	1.17382	0.627714	1.86999	0.0614849	0.323113	Tceal9
ENSMUSG00000025612	52.369	-1.40497	0.751972	-1.86838	0.0617086	0.324023	Bach1
ENSMUSG00000068267	38.5477	-1.64394	0.879955	-1.86821	0.0617329	0.324023	Cenpb
ENSMUSG00000047361	5.92803	2.1117	1.13058	1.86779	0.0617908	0.32413	Gm973
ENSMUSG00000038736	3.77276	1.87217	1.0027	1.86713	0.0618835	0.324419	Nudcd1
ENSMUSG00000006360	80.5114	-1.12176	0.601054	-1.86633	0.0619959	0.324812	Crip1
ENSMUSG00000022517	26.2405	1.4372	0.770456	1.86539	0.0621271	0.325302	Mgrn1
ENSMUSG00000021458	111.258	1.04706	0.561578	1.86449	0.0622534	0.325346	2010111I01Rik
ENSMUSG00000046447	5.89494	1.6555	0.887694	1.86495	0.0621889	0.325346	Camk2n1
ENSMUSG00000052056	7.52015	-1.88253	1.00972	-1.86442	0.0622632	0.325346	Zfp217
ENSMUSG00000066456	14.8143	1.67514	0.898555	1.86425	0.062286	0.325346	Hmgn3
ENSMUSG00000021703	100.567	1.53817	0.825298	1.86378	0.062353	0.325356	Serinc5
ENSMUSG00000024851	15.5366	-1.81398	0.973319	-1.86371	0.0623631	0.325356	Pitpnm1
ENSMUSG00000046229	4.77483	-1.59203	0.854463	-1.8632	0.0624348	0.325534	Scand1
ENSMUSG00000026234	193.196	-0.888385	0.476967	-1.86257	0.0625224	0.325794	Ncl
ENSMUSG00000025887	14.5425	-1.90514	1.02303	-1.86226	0.0625665	0.325828	Casp12
ENSMUSG00000022370	13.7472	1.88838	1.01422	1.86191	0.0626153	0.325886	Mrpl13
ENSMUSG00000040687	3.63014	-2.3403	1.25722	-1.86149	0.0626757	0.326004	Madd
ENSMUSG00000032405	40.2884	-1.5745	0.8461	-1.86089	0.0627594	0.326243	Pias1
ENSMUSG00000025156	6.66324	-1.59254	0.856075	-1.86028	0.0628459	0.326497	Gps1
ENSMUSG00000023092	106.395	-1.51482	0.814904	-1.85889	0.0630429	0.327324	Fhl1
ENSMUSG00000036867	1.10614	1.64436	0.884742	1.85858	0.0630865	0.327354	Smad6
ENSMUSG00000023068	4.09908	1.81478	0.976766	1.85795	0.0631763	0.327585	Nus1
ENSMUSG00000081068	1.11361	-1.61313	0.868333	-1.85773	0.0632069	0.327585	Gm12804
ENSMUSG00000028497	20.5206	-2.31621	1.24715	-1.8572	0.0632825	0.327781	Hacd4
ENSMUSG00000058704	4.14951	1.60681	0.865354	1.85683	0.0633357	0.32786	Memo1
ENSMUSG00000091449	8.99454	-0.743283	0.40039	-1.8564	0.0633966	0.327979	Gm10269
ENSMUSG00000003380	149.78	-0.751972	0.405259	-1.85554	0.0635197	0.328419	Rabac1
ENSMUSG00000053644	19.1004	1.79776	0.969453	1.85441	0.0636812	0.329057	Aldh7a1
ENSMUSG00000095478	3.35188	1.07635	0.580514	1.85414	0.0637191	0.329057	Gm9824
ENSMUSG00000030264	2.18799	1.96623	1.06117	1.85288	0.0638996	0.329792	Thumpd3
ENSMUSG00000000171	72.658	-1.4821	0.800166	-1.85225	0.0639904	0.329902	Sdhd
ENSMUSG00000074486	20.9457	1.96081	1.05864	1.8522	0.0639971	0.329902	Bglap2
ENSMUSG00000006740	51.0762	-1.19907	0.647861	-1.85081	0.0641963	0.330534	Kif5b
ENSMUSG00000060636	4.0195	0.902108	0.487398	1.85087	0.0641888	0.330534	Rpl35a
ENSMUSG00000029726	18.8546	-1.73599	0.939135	-1.8485	0.0645301	0.332055	Mepce
ENSMUSG00000024750	90.1973	-0.92887	0.502744	-1.8476	0.0646601	0.332525	Zfand5
ENSMUSG00000025357	23.3339	-1.79123	0.96963	-1.84734	0.0646983	0.332525	Dgka
ENSMUSG00000020263	37.1921	1.31291	0.710866	1.84691	0.0647603	0.332528	Appl2
ENSMUSG00000056770	17.9395	1.54244	0.835314	1.84654	0.0648141	0.332528	Setd3
ENSMUSG00000096014	0.433428	-1.32624	0.718222	-1.84656	0.0648104	0.332528	Sox1
ENSMUSG00000032932	11.3904	1.7765	0.96231	1.84608	0.0648812	0.332675	Hspa13
ENSMUSG00000033400	1.8546	-1.89736	1.02803	-1.84562	0.0649472	0.332816	Agl
ENSMUSG00000022797	27.4433	1.64443	0.892173	1.84317	0.0653042	0.333897	Tfrc
ENSMUSG00000026135	20.4639	-1.68562	0.914433	-1.84335	0.0652777	0.333897	Zfp142
ENSMUSG00000026374	49.8545	1.2872	0.698385	1.84311	0.0653126	0.333897	Tsn
ENSMUSG00000030956	10.0723	-2.20704	1.19731	-1.84332	0.0652816	0.333897	Fam53b
ENSMUSG00000026879	4026.27	-1.00387	0.545204	-1.84127	0.0655813	0.334677	Gsn
ENSMUSG00000038128	41.8867	1.77253	0.962422	1.84174	0.0655127	0.334677	Camk4
ENSMUSG00000061983	1.71215	-1.45965	0.792676	-1.84143	0.0655593	0.334677	Rps12
ENSMUSG00000028452	9.59054	1.22347	0.66486	1.84019	0.0657409	0.334702	Vcp
ENSMUSG00000036646	16.4653	-1.48885	0.809038	-1.84027	0.0657292	0.334702	Man1b1
ENSMUSG00000045817	38.4776	-1.1138	0.605187	-1.84042	0.0657066	0.334702	Zfp36l2
ENSMUSG00000075470	5.96936	-2.33722	1.26999	-1.84035	0.0657173	0.334702	Deaf1
ENSMUSG00000026814	16.0391	1.84353	1.00265	1.83867	0.0659644	0.335445	Eng
ENSMUSG00000031311	16.2458	1.43458	0.780179	1.83878	0.0659476	0.335445	Nono
ENSMUSG00000020561	4.30891	2.00954	1.09321	1.8382	0.0660335	0.335599	Twistnb
ENSMUSG00000007458	23.3881	-1.51326	0.823518	-1.83756	0.0661269	0.335662	M6pr
ENSMUSG00000009073	19.1187	1.53893	0.837397	1.83775	0.0660991	0.335662	Nf2
ENSMUSG00000024516	33.803	-1.6137	0.878338	-1.83722	0.0661777	0.335662	Sec11c
ENSMUSG00000025134	27.9393	1.25132	0.681187	1.83696	0.0662153	0.335662	Alyref
ENSMUSG00000034401	7.86105	1.86156	1.01348	1.8368	0.06624	0.335662	Spata6
ENSMUSG00000034707	42.863	-1.18082	0.643105	-1.83612	0.0663403	0.335974	Gns
ENSMUSG00000056952	8.69565	-1.82203	0.992815	-1.83521	0.0664742	0.336258	Tatdn2
ENSMUSG00000083912	1.48276	-1.54151	0.839949	-1.83524	0.0664698	0.336258	Gm5391
ENSMUSG00000022863	1.40415	1.41675	0.772397	1.83422	0.0666208	0.336803	Btg3
ENSMUSG00000011752	1.61004	-1.16823	0.637221	-1.83331	0.0667558	0.337114	Pgam1
ENSMUSG00000013822	7.93601	1.91263	1.0433	1.83325	0.066766	0.337114	Elof1
ENSMUSG00000047735	20.7911	-2.3916	1.30473	-1.83302	0.0667991	0.337114	Samd9l
ENSMUSG00000061689	42.3407	-1.24376	0.679021	-1.83169	0.0669978	0.337919	Dlgap4
ENSMUSG00000043964	1.26649	1.52758	0.834675	1.83014	0.0672283	0.338884	Orai3
ENSMUSG00000038535	10.6991	1.50778	0.824419	1.8289	0.0674143	0.339373	Zfp280d
ENSMUSG00000038871	5.80158	1.93118	1.05634	1.82819	0.0675215	0.339373	Bpgm
ENSMUSG00000047126	83.3369	-0.910123	0.49777	-1.8284	0.0674897	0.339373	Cltc
ENSMUSG00000063550	51.4503	-1.1564	0.632185	-1.82922	0.0673667	0.339373	Nup98
ENSMUSG00000081232	2.73226	1.91954	1.04983	1.82843	0.0674856	0.339373	Gm14373
ENSMUSG00000025130	509.442	0.742774	0.406438	1.82752	0.0676215	0.339525	P4hb
ENSMUSG00000037475	41.3759	-1.22742	0.671825	-1.827	0.0677005	0.339525	Thoc2
ENSMUSG00000042821	7.72755	1.7987	0.984334	1.82732	0.0676511	0.339525	Snai1
ENSMUSG00000081992	0.456996	-1.01782	0.557118	-1.82694	0.0677088	0.339525	Gm13408
ENSMUSG00000020653	14.1862	-2.21401	1.21214	-1.82654	0.0677695	0.339633	Klf11
ENSMUSG00000002845	24.1827	1.17387	0.643009	1.82559	0.0679119	0.339862	Tmem39a
ENSMUSG00000027349	3.10394	2.07815	1.13838	1.82554	0.0679202	0.339862	Fam98b
ENSMUSG00000047547	47.1988	1.21605	0.666164	1.82545	0.067933	0.339862	Cltb
ENSMUSG00000041372	6.16117	1.69652	0.92994	1.82433	0.068102	0.34051	B4galnt3
ENSMUSG00000026193	2247.86	1.06759	0.58529	1.82404	0.0681464	0.340535	Fn1
ENSMUSG00000019970	247.788	1.17013	0.641757	1.82332	0.0682557	0.340884	Sgk1
ENSMUSG00000025132	86.1676	-0.98697	0.541505	-1.82264	0.0683573	0.341195	Arhgdia
ENSMUSG00000027522	2.97012	1.81345	0.995584	1.82149	0.068532	0.34187	Stx16
ENSMUSG00000081758	0.682776	-1.49159	0.819642	-1.81981	0.0687877	0.342947	Gm11460
ENSMUSG00000016495	11.0025	-1.91253	1.05153	-1.81882	0.0689395	0.343506	Plgrkt
ENSMUSG00000027332	33.0033	-1.7186	0.945731	-1.81722	0.0691832	0.34372	Ivd
ENSMUSG00000028249	193.727	-0.896502	0.493403	-1.81698	0.0692209	0.34372	Sdcbp
ENSMUSG00000038280	0.907764	1.51187	0.831734	1.81774	0.0691042	0.34372	Ostm1
ENSMUSG00000052752	21.6176	-1.50634	0.829011	-1.81703	0.0692129	0.34372	Traf7
ENSMUSG00000091549	1.10254	-1.08744	0.598472	-1.81703	0.0692126	0.34372	Gm6548
ENSMUSG00000096210	92.5966	1.32507	0.728891	1.81793	0.0690749	0.34372	H1f0
ENSMUSG00000005802	2.1827	1.83918	1.01263	1.81624	0.0693341	0.344085	Slc30a4
ENSMUSG00000023960	17.3203	-1.96808	1.08395	-1.81566	0.0694231	0.344329	Enpp5
ENSMUSG00000057098	47.8637	-1.37714	0.75871	-1.81511	0.069507	0.344548	Ebf1
ENSMUSG00000020220	36.3363	-1.19721	0.659963	-1.81406	0.0696688	0.344786	Vps13d
ENSMUSG00000043192	34.0562	-1.19093	0.656329	-1.81453	0.0695959	0.344786	Gm1840
ENSMUSG00000105195	14.7274	-1.06037	0.584543	-1.81402	0.0696747	0.344786	Gm43584
ENSMUSG00000003746	32.5958	-1.57616	0.870646	-1.81033	0.0702442	0.346613	Man1a
ENSMUSG00000025817	4.66884	2.20326	1.21652	1.81112	0.0701221	0.346613	Nudt5
ENSMUSG00000040760	26.6946	1.41421	0.781102	1.81053	0.0702134	0.346613	Appl1
ENSMUSG00000042284	8.28806	1.93725	1.07009	1.81036	0.0702398	0.346613	Itga1
ENSMUSG00000099875	6.11958	-0.918406	0.507126	-1.811	0.0701406	0.346613	Rbm3-ps
ENSMUSG00000026672	24.5133	-1.67926	0.927808	-1.80992	0.0703078	0.346721	Optn
ENSMUSG00000042460	9.40928	-2.18086	1.20517	-1.80959	0.0703598	0.346721	C1galt1
ENSMUSG00000073131	6.81834	1.71246	0.946418	1.80942	0.0703863	0.346721	Vma21
ENSMUSG00000055817	13.2868	-2.09442	1.15768	-1.80915	0.070428	0.346728	Mta3
ENSMUSG00000024912	17.7038	2.02821	1.12137	1.80869	0.0704988	0.34688	Fosl1
ENSMUSG00000000711	3.59887	1.53718	0.850598	1.80718	0.0707344	0.347274	Rab5b
ENSMUSG00000027374	3.70839	2.1199	1.17257	1.80791	0.0706202	0.347274	Mrps5
ENSMUSG00000068823	118.531	-0.707749	0.391695	-1.80689	0.0707797	0.347274	Csde1
ENSMUSG00000070729	15.4902	-0.903231	0.499795	-1.8072	0.0707308	0.347274	Gm12966
ENSMUSG00000090119	5.52416	-1.16191	0.642992	-1.80704	0.0707564	0.347274	Gm8185
ENSMUSG00000025860	20.8625	1.64836	0.912574	1.80628	0.070875	0.347348	Xiap
ENSMUSG00000037926	54.488	-1.36103	0.753487	-1.8063	0.070871	0.347348	Ssh2
ENSMUSG00000068917	5.08819	1.60683	0.889938	1.80555	0.0709889	0.347709	Clk2
ENSMUSG00000040883	16.419	-2.30277	1.27598	-1.8047	0.0711215	0.348161	Tmem205
ENSMUSG00000037936	29.232	1.52715	0.84636	1.80437	0.0711735	0.348219	Scarb1
ENSMUSG00000028672	18.3223	2.04636	1.13433	1.80403	0.071227	0.348283	Hmgcl
ENSMUSG00000035840	11.5576	-1.78825	0.991712	-1.80319	0.0713582	0.348728	Lysmd3
ENSMUSG00000015837	640.495	-0.843488	0.467945	-1.80254	0.0714611	0.349034	Sqstm1
ENSMUSG00000027195	10.331	1.80896	1.00529	1.79945	0.0719481	0.351214	Hsd17b12
ENSMUSG00000034211	16.5042	1.90112	1.05688	1.79881	0.0720486	0.351292	Mrps17
ENSMUSG00000040054	25.7504	-1.20811	0.671626	-1.79878	0.0720532	0.351292	Baz2a
ENSMUSG00000068663	11.7419	-1.78449	0.992169	-1.79858	0.0720858	0.351292	Clec16a
ENSMUSG00000020432	58.6173	-1.93324	1.07572	-1.79715	0.0723112	0.352191	Tcn2
ENSMUSG00000045374	4.25127	-2.00257	1.11454	-1.79677	0.0723726	0.352292	Wdr81
ENSMUSG00000038970	7.65331	-1.94532	1.0831	-1.79607	0.0724829	0.35263	Lmtk2
ENSMUSG00000083270	5.7851	-0.903952	0.503415	-1.79564	0.072552	0.352768	Gm13498
ENSMUSG00000046111	3.53123	1.7813	0.992455	1.79485	0.0726782	0.353051	Cep295
ENSMUSG00000060550	7.35633	-1.929	1.07479	-1.79476	0.0726918	0.353051	H2-Q7
ENSMUSG00000002105	63.6896	1.40576	0.783787	1.79355	0.0728857	0.35306	Slc39a13
ENSMUSG00000026771	3.66295	1.72547	0.962185	1.79329	0.072927	0.35306	Spopl
ENSMUSG00000034640	115.308	-1.16793	0.651303	-1.79322	0.0729384	0.35306	Tiparp
ENSMUSG00000043924	45.2385	1.77326	0.988842	1.79327	0.0729294	0.35306	Ncmap
ENSMUSG00000097195	7.67927	1.88087	1.04883	1.7933	0.0729256	0.35306	Snhg5
ENSMUSG00000105434	5.2107	2.16601	1.20745	1.79387	0.072834	0.35306	Gm43359
ENSMUSG00000009741	18.3644	1.35116	0.753676	1.79276	0.0730109	0.353213	Ubp1
ENSMUSG00000020034	43.6342	-1.29723	0.723784	-1.79229	0.0730858	0.353333	Tcp11l2
ENSMUSG00000020444	17.9998	1.83967	1.02654	1.7921	0.0731175	0.353333	Guk1
ENSMUSG00000027303	53.56	1.3484	0.752653	1.79153	0.0732078	0.353375	Ptpra
ENSMUSG00000039599	9.23997	1.85596	1.03585	1.79174	0.0731749	0.353375	Fam149b
ENSMUSG00000098234	6.1106	1.44116	0.804573	1.79121	0.0732601	0.35343	Snhg6
ENSMUSG00000011179	95.4674	-1.10192	0.615366	-1.79068	0.0733454	0.353447	Odc1
ENSMUSG00000022538	8.06956	1.86544	1.0417	1.79076	0.0733318	0.353447	Lsg1
ENSMUSG00000031918	8.23257	1.61284	0.901418	1.78922	0.0735795	0.353791	Mtmr2
ENSMUSG00000040225	92.5504	-0.869163	0.485779	-1.78921	0.0735804	0.353791	Prrc2c
ENSMUSG00000050229	11.7139	-2.11499	1.18182	-1.7896	0.0735183	0.353791	Pigm
ENSMUSG00000064210	53.2714	1.28258	0.716777	1.78937	0.0735555	0.353791	Ano6
ENSMUSG00000063765	117.39	1.78329	0.996907	1.78882	0.0736434	0.353897	Chadl
ENSMUSG00000019370	45.7282	-1.20215	0.672836	-1.78669	0.0739871	0.35443	Calm3
ENSMUSG00000021635	6.62159	-2.11445	1.18341	-1.78675	0.073978	0.35443	Rad17
ENSMUSG00000021866	22.4124	-1.31892	0.738326	-1.78636	0.0740406	0.35443	Anxa11
ENSMUSG00000022231	59.0338	-1.63983	0.91794	-1.78642	0.0740311	0.35443	Sema5a
ENSMUSG00000028690	7.88156	2.155	1.20652	1.78612	0.0740795	0.35443	Mmachc
ENSMUSG00000032306	4.22749	2.06519	1.15623	1.78615	0.0740756	0.35443	Mpi
ENSMUSG00000040713	48.4501	-1.52289	0.852631	-1.78611	0.0740819	0.35443	Creg1
ENSMUSG00000060002	27.5031	1.54191	0.863265	1.78614	0.0740774	0.35443	Chpt1
ENSMUSG00000037827	4.4563	1.4418	0.807778	1.78489	0.0742785	0.355174	Gm5884
ENSMUSG00000027286	5.52581	-2.30615	1.29287	-1.78374	0.0744661	0.355728	Lrrc57
ENSMUSG00000028580	28.6678	-1.11248	0.623703	-1.78367	0.0744767	0.355728	Pum1
ENSMUSG00000056692	41.0043	-1.17859	0.661369	-1.78205	0.0747418	0.356797	D17Wsu92e
ENSMUSG00000036446	627.914	1.23494	0.693261	1.78134	0.0748565	0.357148	Lum
ENSMUSG00000038299	3.83641	2.09396	1.17593	1.78069	0.0749632	0.357459	Wdr36
ENSMUSG00000017221	29.3844	1.57443	0.884886	1.77925	0.0751987	0.358138	Psmd3
ENSMUSG00000021870	20.7607	-1.46356	0.822515	-1.77937	0.0751798	0.358138	Slmap
ENSMUSG00000029462	18.6514	-1.51572	0.85198	-1.77906	0.0752298	0.358138	Vps29
ENSMUSG00000017264	37.4391	-1.47557	0.829731	-1.77837	0.0753433	0.358404	Exosc10
ENSMUSG00000049482	3.4672	1.66866	0.938391	1.77822	0.0753685	0.358404	Ctu2
ENSMUSG00000049421	16.8583	1.51771	0.854096	1.77698	0.0755714	0.359172	Zfp260
ENSMUSG00000027954	15.9472	2.21368	1.24718	1.77495	0.0759058	0.360563	Efna1
ENSMUSG00000079426	60.8597	-1.05924	0.596983	-1.77432	0.0760095	0.360857	Arpc4
ENSMUSG00000030876	35.5943	-1.34472	0.75824	-1.77347	0.0761509	0.361331	Mettl9
ENSMUSG00000020393	16.3455	1.55533	0.877294	1.77288	0.0762492	0.3614	Kremen1
ENSMUSG00000028420	8.63007	-2.18896	1.2346	-1.77302	0.0762257	0.3614	Tmem38b
ENSMUSG00000015176	35.3719	1.42123	0.802384	1.77126	0.0765167	0.362111	Nolc1
ENSMUSG00000025324	12.5419	1.63598	0.923639	1.77123	0.0765219	0.362111	Atp10a
ENSMUSG00000036667	17.4665	1.6131	0.91073	1.77122	0.0765247	0.362111	Tcaf1
ENSMUSG00000046223	110.182	-2.31264	1.30644	-1.77018	0.0766968	0.362727	Plaur
ENSMUSG00000022216	21.5869	-1.63482	0.923796	-1.76967	0.0767817	0.36293	Psme1
ENSMUSG00000079427	1.17871	1.67169	0.945533	1.76798	0.0770636	0.364063	Mthfsl
ENSMUSG00000030978	21.221	-2.17399	1.23025	-1.76711	0.0772094	0.364553	Rrm1
ENSMUSG00000026107	42.1316	-2.09256	1.18531	-1.76541	0.0774947	0.36543	Nabp1
ENSMUSG00000027016	17.548	1.50428	0.852165	1.76525	0.0775218	0.36543	Zfp385b
ENSMUSG00000044857	11.0405	1.59824	0.905348	1.76533	0.0775079	0.36543	Lemd2
ENSMUSG00000022685	14.3796	-1.82315	1.03326	-1.76447	0.0776528	0.365649	Parn
ENSMUSG00000028634	60.2739	1.5275	0.865672	1.76453	0.0776429	0.365649	Hivep3
ENSMUSG00000044573	3.53944	1.85364	1.05072	1.76417	0.077704	0.365691	Acp1
ENSMUSG00000039483	6.8944	-2.27434	1.28938	-1.7639	0.0777485	0.365701	Asb6
ENSMUSG00000074364	21.9218	1.349	0.765456	1.76235	0.0780101	0.366732	Ehd2
ENSMUSG00000062866	38.6993	-1.39555	0.79217	-1.76168	0.0781237	0.367067	Phactr2
ENSMUSG00000022024	13.8637	-1.63099	0.925964	-1.76139	0.078172	0.367094	Sugt1
ENSMUSG00000015536	11.798	1.84246	1.04634	1.76086	0.078262	0.367318	Mocs2
ENSMUSG00000020620	59.2537	-2.12017	1.20548	-1.75878	0.0786141	0.36877	Abca8b
ENSMUSG00000036257	25.1458	-1.32169	0.751754	-1.75815	0.0787227	0.368948	Pnpla8
ENSMUSG00000037369	7.19138	1.69383	0.963465	1.75806	0.0787372	0.368948	Kdm6a
ENSMUSG00000006920	33.0567	-1.82541	1.03877	-1.75729	0.0788691	0.368966	Ezh1
ENSMUSG00000020186	21.1526	-2.01728	1.14783	-1.75746	0.0788386	0.368966	Csrp2
ENSMUSG00000038859	5.15883	2.1138	1.20266	1.7576	0.0788161	0.368966	Baiap2l1
ENSMUSG00000043079	74.4595	1.27127	0.723587	1.7569	0.0789341	0.36907	Synpo
ENSMUSG00000025878	32.5404	-1.48002	0.842958	-1.75574	0.079132	0.369796	Uimc1
ENSMUSG00000003038	9.60213	-1.26344	0.719932	-1.75495	0.079268	0.369989	Hmgn2
ENSMUSG00000006418	52.9356	-1.4187	0.808605	-1.7545	0.0793444	0.369989	Rnf114
ENSMUSG00000038077	10.0319	1.91099	1.08913	1.75461	0.0793262	0.369989	Kcna6
ENSMUSG00000073418	193.584	1.47701	0.841617	1.75496	0.0792658	0.369989	C4b
ENSMUSG00000022965	30.3186	-1.86285	1.06222	-1.75373	0.0794761	0.370036	Ifngr2
ENSMUSG00000037438	2.39058	-0.881002	0.502369	-1.75369	0.0794828	0.370036	Uqcrh-ps1
ENSMUSG00000097451	25.7426	1.80061	1.02662	1.75393	0.0794431	0.370036	Rian
ENSMUSG00000026970	73.9595	-1.02421	0.584212	-1.75315	0.0795769	0.370274	Rbms1
ENSMUSG00000017858	8.17108	2.04797	1.16869	1.75235	0.079713	0.370708	Ift52
ENSMUSG00000027679	5.94557	1.27812	0.73004	1.75075	0.0799889	0.371375	Dnajc19
ENSMUSG00000030733	15.6915	-1.71456	0.979445	-1.75054	0.0800251	0.371375	Sh2b1
ENSMUSG00000035011	17.4818	-1.48437	0.847835	-1.75078	0.0799842	0.371375	Zbtb7a
ENSMUSG00000078440	10.6304	2.03631	1.16326	1.75052	0.0800281	0.371375	Dohh
ENSMUSG00000065037	87.2287	-0.53302	0.304808	-1.74871	0.0803411	0.372628	Rn7sk
ENSMUSG00000078348	19.9786	-1.38203	0.790621	-1.74803	0.0804581	0.37297	Sf3b5
ENSMUSG00000025403	14.6161	2.03121	1.16244	1.74737	0.0805728	0.373102	Shmt2
ENSMUSG00000028962	9.95979	1.5419	0.8824	1.74739	0.0805699	0.373102	Slc4a2
ENSMUSG00000030055	25.5073	-1.628	0.932165	-1.74647	0.080729	0.373626	Rab43
ENSMUSG00000001100	15.0679	-1.6271	0.932662	-1.74458	0.0810583	0.374548	Poldip2
ENSMUSG00000028670	13.4106	-1.63676	0.938139	-1.74469	0.0810385	0.374548	Lypla2
ENSMUSG00000033099	5.08003	1.96586	1.12653	1.74506	0.0809741	0.374548	Nol12
ENSMUSG00000044700	3.76932	-2.15809	1.23734	-1.74413	0.0811361	0.374708	Tmem201
ENSMUSG00000039318	15.8463	1.41127	0.809349	1.74371	0.0812104	0.374851	Rab3gap2
ENSMUSG00000026960	2.3086	1.89874	1.08914	1.74335	0.0812733	0.374941	Arl6ip6
ENSMUSG00000030738	38.8662	-1.26529	0.72667	-1.74122	0.0816443	0.376452	Eif3c
ENSMUSG00000020827	6.39776	-1.57952	0.907652	-1.74023	0.0818186	0.376997	Mink1
ENSMUSG00000027628	5.55774	-2.10107	1.20748	-1.74005	0.0818497	0.376997	Aar2
ENSMUSG00000039828	1.56657	-1.77483	1.02065	-1.73893	0.0820469	0.377503	Wdr70
ENSMUSG00000041560	56.7967	-1.14267	0.657042	-1.73911	0.0820157	0.377503	Nop53
ENSMUSG00000001089	53.6068	1.12824	0.649035	1.73834	0.0821507	0.377719	Luzp1
ENSMUSG00000022184	6.05538	2.00581	1.15398	1.73817	0.0821811	0.377719	Fbxo4
ENSMUSG00000022421	3.87318	1.81168	1.04269	1.73751	0.082297	0.378004	Nptxr
ENSMUSG00000024360	78.9404	-1.10767	0.637586	-1.73729	0.0823364	0.378004	Etf1
ENSMUSG00000061950	13.6158	1.30522	0.751388	1.73707	0.0823743	0.378004	Ppp4r1
ENSMUSG00000021288	37.1557	1.04872	0.603875	1.73665	0.0824488	0.378145	Klc1
ENSMUSG00000021929	3.15346	1.93399	1.11532	1.73403	0.0829135	0.379329	Kpna3
ENSMUSG00000023886	585.848	-1.45082	0.83671	-1.73395	0.0829261	0.379329	Smoc2
ENSMUSG00000029833	6.48926	2.07024	1.19381	1.73415	0.0828917	0.379329	Trim24
ENSMUSG00000046532	13.8321	-1.87809	1.08284	-1.7344	0.0828466	0.379329	Ar
ENSMUSG00000091825	16.4064	-0.818693	0.472077	-1.73424	0.0828762	0.379329	Gm5778
ENSMUSG00000030654	48.2169	-1.47274	0.849477	-1.7337	0.0829706	0.379332	Arl6ip1
ENSMUSG00000086331	6.28589	-1.95263	1.12669	-1.73306	0.0830847	0.379653	Gm16310
ENSMUSG00000030747	18.6544	-2.08952	1.20627	-1.73221	0.0832369	0.380147	Dgat2
ENSMUSG00000007036	76.2545	-1.29965	0.750582	-1.73152	0.0833594	0.380506	Abhd16a
ENSMUSG00000022789	22.5492	-1.5041	0.869048	-1.73074	0.0834975	0.380935	Dnm1l
ENSMUSG00000031765	309.042	-1.18637	0.686115	-1.72911	0.0837886	0.38186	Mt1
ENSMUSG00000035086	21.4863	-1.41626	0.81895	-1.72935	0.0837456	0.38186	Becn1
ENSMUSG00000028618	186.491	0.74175	0.429183	1.72828	0.0839373	0.382337	Tmem59
ENSMUSG00000022528	28.1623	-1.34942	0.781234	-1.72729	0.0841155	0.382947	Hes1
ENSMUSG00000033735	13.7618	-1.94356	1.12557	-1.72674	0.0842151	0.382997	Spr
ENSMUSG00000091421	22.0523	-0.783689	0.453855	-1.72674	0.0842143	0.382997	Gm4202
ENSMUSG00000020532	11.2825	1.41096	0.817278	1.72641	0.0842735	0.383025	Acaca
ENSMUSG00000042675	74.5648	-1.11008	0.643073	-1.72621	0.0843097	0.383025	Ypel3
ENSMUSG00000033880	51.9898	1.57359	0.91182	1.72577	0.0843882	0.38318	Lgals3bp
ENSMUSG00000090582	20.7259	-1.71854	0.996144	-1.72519	0.0844931	0.383455	Gm17024
ENSMUSG00000049807	31.9918	1.13736	0.659471	1.72465	0.0845902	0.383695	Arhgap23
ENSMUSG00000015869	25.5361	1.33602	0.775009	1.72387	0.0847305	0.383928	Prpsap1
ENSMUSG00000081233	0.499115	-1.21829	0.7067	-1.72392	0.0847227	0.383928	Gm12857
ENSMUSG00000026003	39.7003	-1.5101	0.876557	-1.72277	0.0849308	0.384528	Acadl
ENSMUSG00000038866	16.8804	-1.55487	0.902601	-1.72265	0.0849517	0.384528	Zcchc2
ENSMUSG00000020870	2.30471	-1.69773	0.986017	-1.7218	0.0851054	0.384935	Cdc34b
ENSMUSG00000104141	0.872128	-1.16465	0.67647	-1.72166	0.0851306	0.384935	Gm6140
ENSMUSG00000039157	5.7471	1.55749	0.904963	1.72105	0.085242	0.385237	Fam102a
ENSMUSG00000047787	1.998	-1.8692	1.08645	-1.72047	0.0853462	0.385506	Flrt1
ENSMUSG00000025162	59.1833	-0.995469	0.57876	-1.72	0.0854322	0.385693	Csnk1d
ENSMUSG00000074925	9.01589	1.50433	0.875262	1.71871	0.0856663	0.386549	Ptar1
ENSMUSG00000034574	19.0843	-1.45518	0.846815	-1.71842	0.0857203	0.38659	Daam1
ENSMUSG00000055435	17.995	1.57559	0.917694	1.7169	0.0859978	0.38764	Maf
ENSMUSG00000059439	19.961	-1.65785	0.965769	-1.71661	0.0860497	0.387672	Bcas3
ENSMUSG00000026037	6.78859	-2.17717	1.2692	-1.71538	0.0862756	0.387988	Orc2
ENSMUSG00000027531	7.94843	1.79301	1.04515	1.71556	0.0862428	0.387988	Impa1
ENSMUSG00000035642	7.76228	1.99661	1.16403	1.71525	0.0862993	0.387988	Aamdc
ENSMUSG00000041654	13.4348	1.89483	1.10447	1.7156	0.0862353	0.387988	Slc39a11
ENSMUSG00000034903	21.7956	1.79396	1.04612	1.71487	0.0863693	0.388101	Cobll1
ENSMUSG00000025138	24.2575	-1.95867	1.14245	-1.71444	0.0864478	0.388252	Sirt7
ENSMUSG00000018199	7.19239	1.75155	1.02214	1.7136	0.086602	0.388743	Trove2
ENSMUSG00000023348	23.1642	1.60276	0.936217	1.71196	0.0869044	0.389323	Trip6
ENSMUSG00000029311	12.5981	-1.71252	1.00035	-1.71192	0.0869112	0.389323	Hsd17b11
ENSMUSG00000064368	26.4723	0.779754	0.455367	1.71236	0.0868296	0.389323	mt-Nd6
ENSMUSG00000083626	1.79052	-1.34165	0.783481	-1.71242	0.0868192	0.389323	Gm4459
ENSMUSG00000050029	4.02766	1.73425	1.01321	1.71164	0.0869636	0.389356	Rap2c
ENSMUSG00000001054	30.9396	-1.62012	0.948095	-1.70881	0.0874855	0.389636	Rmnd5b
ENSMUSG00000019782	5.63119	1.397	0.816705	1.71053	0.087167	0.389636	Rwdd1
ENSMUSG00000021039	23.777	-1.5117	0.883709	-1.71063	0.0871495	0.389636	Snw1
ENSMUSG00000024909	67.3015	1.21696	0.71157	1.71024	0.087221	0.389636	Efemp2
ENSMUSG00000026047	3.85791	1.98365	1.16097	1.70862	0.0875217	0.389636	Kdelc1
ENSMUSG00000029670	5.22788	1.94249	1.13644	1.70927	0.0874002	0.389636	Ing3
ENSMUSG00000035863	11.1685	-1.79083	1.04736	-1.70985	0.0872928	0.389636	Palm
ENSMUSG00000041915	9.12945	2.01238	1.17623	1.71087	0.0871054	0.389636	Ammecr1l
ENSMUSG00000046727	17.6527	-2.11676	1.2383	-1.70941	0.0873755	0.389636	Cystm1
ENSMUSG00000059920	10.799	-1.81917	1.06423	-1.70938	0.0873809	0.389636	4930453N24Rik
ENSMUSG00000081887	2.19913	1.39845	0.818238	1.70909	0.0874334	0.389636	Gm12097
ENSMUSG00000040669	15.5609	-1.71383	1.00337	-1.70808	0.0876211	0.389878	Phc1
ENSMUSG00000035521	7.32626	1.74792	1.02357	1.70768	0.0876958	0.389957	Gnptg
ENSMUSG00000046201	18.2275	-1.25942	0.73758	-1.7075	0.087729	0.389957	Scaf8
ENSMUSG00000020023	10.1389	-2.15078	1.26054	-1.70623	0.0879644	0.390714	Tmcc3
ENSMUSG00000026389	43.0012	-1.90464	1.11637	-1.7061	0.0879898	0.390714	Steap3
ENSMUSG00000022536	37.3608	-1.20268	0.705344	-1.7051	0.0881754	0.391337	Glyr1
ENSMUSG00000022389	44.6048	-1.13654	0.66675	-1.7046	0.0882695	0.391554	Tef
ENSMUSG00000020412	9.64409	1.63619	0.960217	1.70398	0.0883851	0.391676	Ascc2
ENSMUSG00000097769	6.10483	1.98991	1.16781	1.70397	0.0883874	0.391676	Snhg4
ENSMUSG00000020288	9.44195	-1.73558	1.01885	-1.70346	0.0884815	0.391691	Ahsa2
ENSMUSG00000042594	30.4698	-0.758136	0.445054	-1.70347	0.0884804	0.391691	Sh2b3
ENSMUSG00000070327	48.6466	-1.51474	0.890669	-1.70067	0.0890041	0.393602	Rnf213
ENSMUSG00000074259	29.5234	2.06292	1.21298	1.7007	0.0889992	0.393602	Gramd2
ENSMUSG00000058446	17.6854	-1.52549	0.897305	-1.70007	0.0891169	0.393899	Znrf2
ENSMUSG00000071180	8.57895	2.17269	1.27831	1.69965	0.0891964	0.394049	Smim15
ENSMUSG00000028937	9.70943	1.84214	1.0843	1.69891	0.0893354	0.394462	Acot7
ENSMUSG00000005973	39.2891	1.31301	0.772995	1.6986	0.089394	0.394519	Rcn1
ENSMUSG00000022780	97.6428	1.68766	0.994051	1.69776	0.0895529	0.394723	Meltf
ENSMUSG00000028467	4.87371	-1.93642	1.14098	-1.69715	0.0896682	0.394723	Gba2
ENSMUSG00000031939	14.7415	1.35485	0.798041	1.69772	0.0895605	0.394723	Taf1d
ENSMUSG00000062604	32.5118	-1.2027	0.708562	-1.69738	0.0896257	0.394723	Srpk2
ENSMUSG00000096145	24.3854	1.18084	0.695772	1.69717	0.0896654	0.394723	Vkorc1
ENSMUSG00000021662	2.07564	1.94875	1.14905	1.69596	0.0898939	0.394808	Arhgef28
ENSMUSG00000027111	5.38227	1.55771	0.918244	1.6964	0.0898107	0.394808	Itga6
ENSMUSG00000040296	30.412	-1.67623	0.988326	-1.69603	0.0898796	0.394808	Ddx58
ENSMUSG00000041828	176.422	-1.86991	1.10264	-1.69584	0.0899159	0.394808	Abca8a
ENSMUSG00000090841	44.036	-0.668113	0.393967	-1.69586	0.0899117	0.394808	Myl6
ENSMUSG00000074698	5.21833	1.27688	0.753241	1.69518	0.090042	0.395162	Csnk2a1
ENSMUSG00000029201	106.222	1.13307	0.668896	1.69393	0.0902779	0.395795	Ugdh
ENSMUSG00000046434	5.58851	1.09173	0.644413	1.69415	0.0902372	0.395795	Hnrnpa1
ENSMUSG00000008301	5.84438	1.62989	0.96328	1.69202	0.0906422	0.395881	Phax
ENSMUSG00000018931	9.39017	-2.09519	1.23748	-1.69311	0.0904345	0.395881	Natd1
ENSMUSG00000020863	28.2414	-1.25028	0.738436	-1.69314	0.0904279	0.395881	Luc7l3
ENSMUSG00000022808	22.8533	-1.43989	0.851247	-1.69151	0.0907396	0.395881	Snx4
ENSMUSG00000027742	10.1838	1.94273	1.14858	1.69143	0.0907552	0.395881	Cog6
ENSMUSG00000036565	13.784	-1.55832	0.920702	-1.69253	0.0905445	0.395881	Ttyh3
ENSMUSG00000038059	87.7706	-1.48516	0.877645	-1.69221	0.0906056	0.395881	Smim3
ENSMUSG00000044749	22.683	-2.49464	1.47421	-1.69219	0.0906105	0.395881	Abca6
ENSMUSG00000058135	75.1521	-1.58002	0.934124	-1.69144	0.0907525	0.395881	Gstm1
ENSMUSG00000061046	6.5346	-1.94637	1.15056	-1.69167	0.0907081	0.395881	Haghl
ENSMUSG00000006818	55.091	-1.3553	0.801809	-1.6903	0.0909704	0.39642	Sod2
ENSMUSG00000021495	8.3459	-1.93357	1.14388	-1.69037	0.0909578	0.39642	Fam193b
ENSMUSG00000028036	10.9846	-1.48444	0.878444	-1.68985	0.0910561	0.396594	Ptgfr
ENSMUSG00000052557	6.83821	1.66251	0.984132	1.68932	0.0911587	0.396841	Gan
ENSMUSG00000032293	18.0202	-1.47473	0.873374	-1.68854	0.0913067	0.397285	Ireb2
ENSMUSG00000030751	31.4329	-1.42941	0.847345	-1.68693	0.0916176	0.398438	Psma1
ENSMUSG00000018481	27.6557	1.2903	0.76506	1.68653	0.0916928	0.398485	Appbp2
ENSMUSG00000018572	11.7631	1.73988	1.03196	1.686	0.0917957	0.398485	Phf23
ENSMUSG00000036707	53.7103	-1.05073	0.623241	-1.68591	0.091814	0.398485	Cab39
ENSMUSG00000038773	14.9637	-1.59181	0.944315	-1.68567	0.0918589	0.398485	Kdm3b
ENSMUSG00000055707	23.4583	-1.82481	1.08209	-1.68638	0.0917229	0.398485	Klhl26
ENSMUSG00000005124	29.2838	1.8472	1.09639	1.68481	0.0920257	0.398953	Wisp1
ENSMUSG00000020032	10.4213	1.68349	0.999319	1.68464	0.092059	0.398953	Nuak1
ENSMUSG00000031103	13.8013	1.60284	0.95211	1.68346	0.0922863	0.399738	Elf4
ENSMUSG00000020740	5.74325	-1.71333	1.01792	-1.68317	0.0923427	0.399782	Gga3
ENSMUSG00000031320	18.9864	-0.781791	0.464571	-1.68282	0.0924093	0.39987	Rps4x
[truncated: 6,651 more rows]

## Sheet: MSC-S like DEG
Ensembl ID	baseMean	log2Fold Change	lfcSE	stat	P-value	Padj	Gene Symbol
ENSMUSG00000022037	3271.04	7.33371	0.602096	12.1803	3.95839e-34	1.9596e-30	Clu
ENSMUSG00000039084	134.224	9.36631	0.768579	12.1865	3.66698e-34	1.9596e-30	Chad
ENSMUSG00000030607	162.897	11.2893	1.0498	10.7538	5.68909e-27	1.87759e-23	Acan
ENSMUSG00000020218	107.03	10.348	0.979447	10.5652	4.32239e-26	1.0699e-22	Wif1
ENSMUSG00000062329	174.886	9.8763	0.965764	10.2264	1.51006e-24	2.99022e-21	Cytl1
ENSMUSG00000029304	104.314	6.3228	0.703364	8.98937	2.48641e-19	4.103e-16	Spp1
ENSMUSG00000020183	198.197	9.28144	1.1469	8.09264	5.83847e-16	8.2581e-13	Cpm
ENSMUSG00000022483	42.1715	7.95393	0.992647	8.01284	1.12087e-15	1.38722e-12	Col2a1
ENSMUSG00000038370	20.3922	6.89859	1.01063	6.82602	8.73005e-12	9.60403e-09	Pcp4l1
ENSMUSG00000047139	101.417	8.65116	1.27095	6.80684	9.97655e-12	9.87779e-09	Cd24a
ENSMUSG00000101939	1.22176	3.37575	0.536411	6.29322	3.10946e-10	2.7988e-07	Gm28438
ENSMUSG00000038665	8.31731	5.42622	0.912746	5.94495	2.76547e-09	2.28174e-06	Dgki
ENSMUSG00000060924	17.7771	-5.98406	1.0206	-5.86331	4.53734e-09	3.45571e-06	Csmd1
ENSMUSG00000029832	6.36313	4.4071	0.790213	5.5771	2.44556e-08	1.72953e-05	Nfe2l3
ENSMUSG00000073867	84.1297	1.58281	0.285189	5.55004	2.85601e-08	1.88516e-05	AA474408
ENSMUSG00000026725	8.10239	6.32688	1.15164	5.4938	3.93377e-08	2.43427e-05	Tnn
ENSMUSG00000038128	26.7313	6.27222	1.16611	5.37877	7.49961e-08	4.36786e-05	Camk4
ENSMUSG00000063455	82.4162	3.9693	0.750973	5.28554	1.25332e-07	6.89398e-05	D630045J12Rik
ENSMUSG00000030605	538.799	1.70444	0.328707	5.18528	2.15693e-07	0.000112399	Mfge8
ENSMUSG00000024661	1775.94	-0.827135	0.161046	-5.13601	2.80634e-07	0.000132312	Fth1
ENSMUSG00000084289	76.227	-0.852851	0.166024	-5.13692	2.79271e-07	0.000132312	Gm6977
ENSMUSG00000028989	459.776	4.97093	0.97382	5.10456	3.31559e-07	0.000142729	Angptl7
ENSMUSG00000029306	4.64826	2.95754	0.57889	5.10898	3.23902e-07	0.000142729	Ibsp
ENSMUSG00000023206	8.63987	5.18252	1.02522	5.05501	4.30364e-07	0.000177543	Il15ra
ENSMUSG00000025776	110.219	5.10079	1.01363	5.03221	4.84861e-07	0.000192024	Crispld1
ENSMUSG00000022265	290.424	2.53038	0.511028	4.95154	7.36267e-07	0.000280376	Ank
ENSMUSG00000018593	3728.9	1.22985	0.249815	4.92304	8.52114e-07	0.000312116	Sparc
ENSMUSG00000096780	3.00306	2.90409	0.590726	4.91614	8.82664e-07	0.000312116	Tmem181b-ps
ENSMUSG00000027523	9.40235	1.2102	0.248505	4.86991	1.11648e-06	0.000368474	Gnas
ENSMUSG00000073418	180.53	-3.66782	0.752851	-4.8719	1.10528e-06	0.000368474	C4b
ENSMUSG00000000392	392.299	-2.41667	0.497979	-4.85295	1.21638e-06	0.000388497	Fap
ENSMUSG00000026034	254.559	1.1016	0.228079	4.82989	1.3661e-06	0.00042268	Clk1
ENSMUSG00000023915	27.1793	5.72278	1.2417	4.60884	4.04926e-06	0.0012149	Tnfrsf21
ENSMUSG00000021319	2234.38	-3.34595	0.729108	-4.58911	4.45149e-06	0.00125926	Sfrp4
ENSMUSG00000023150	167.482	1.74793	0.380668	4.59174	4.3956e-06	0.00125926	Ivns1abp
ENSMUSG00000049551	40.2843	5.79112	1.27856	4.5294	5.91507e-06	0.00162681	Fzd9
ENSMUSG00000029126	43.5839	-2.69659	0.610489	-4.4171	1.00035e-05	0.00267689	Nsg1
ENSMUSG00000092998	135.703	0.952694	0.220755	4.31562	1.59156e-05	0.00414684	Mir5099
ENSMUSG00000034664	6.26579	-2.26726	0.528114	-4.29312	1.7618e-05	0.0044727	Itga2b
ENSMUSG00000033022	25.7126	4.05626	0.94797	4.27889	1.87829e-05	0.00464924	Cdo1
ENSMUSG00000040528	4.83102	3.69736	0.87053	4.24725	2.16406e-05	0.00522594	Milr1
ENSMUSG00000048756	80.4786	1.39742	0.336741	4.14985	3.32691e-05	0.00784279	Foxo3
ENSMUSG00000020788	4.85124	3.18609	0.782222	4.07312	4.6387e-05	0.0106809	Atp2a3
ENSMUSG00000020900	20.7709	2.61242	0.645435	4.04754	5.17593e-05	0.011647	Myh10
ENSMUSG00000028583	58.622	-1.65272	0.412783	-4.00385	6.23209e-05	0.013308	Pdpn
ENSMUSG00000051177	12.3178	4.15832	1.03807	4.00581	6.18062e-05	0.013308	Plcb1
ENSMUSG00000097971	2912.11	0.802348	0.200555	4.00063	6.31728e-05	0.013308	Gm26917
ENSMUSG00000016559	249.982	0.686756	0.172416	3.98314	6.80106e-05	0.0140286	H3f3b
ENSMUSG00000041592	79.835	2.91144	0.733617	3.9686	7.22947e-05	0.014608	Sdk2
ENSMUSG00000090394	129.181	1.65549	0.420491	3.93703	8.24949e-05	0.0163356	4930523C07Rik
ENSMUSG00000017493	543.049	-1.39895	0.358059	-3.90703	9.34372e-05	0.0181396	Igfbp4
ENSMUSG00000021613	69.5476	4.8068	1.23566	3.89007	0.000100213	0.019081	Hapln1
ENSMUSG00000064325	29.3458	4.3537	1.13677	3.8299	0.000128198	0.0239488	Hhip
ENSMUSG00000031283	132.586	-3.26504	0.854327	-3.82177	0.000132495	0.0242932	Chrdl1
ENSMUSG00000035569	51.5792	1.54232	0.40701	3.78938	0.000151022	0.0271868	Ankrd11
ENSMUSG00000022586	0.994715	-1.98238	0.53025	-3.73857	0.00018507	0.0327211	Ly6i
ENSMUSG00000027966	98.7973	3.39091	0.917974	3.6939	0.000220837	0.0383597	Col11a1
ENSMUSG00000021281	210.707	-1.82702	0.496165	-3.68228	0.000231159	0.038971	Tnfaip2
ENSMUSG00000025746	83.8846	-3.55794	0.967669	-3.67682	0.000236164	0.038971	Il6
ENSMUSG00000029312	18.4686	3.18364	0.865113	3.68003	0.000233207	0.038971	Klhl8
ENSMUSG00000002504	17.0893	3.04214	0.833186	3.65122	0.000261002	0.0423636	Slc9a3r2
ENSMUSG00000026051	190.046	3.1595	0.867555	3.64184	0.000270691	0.0432277	1500015O10Rik
ENSMUSG00000030315	32.5578	2.03292	0.564619	3.60051	0.000317588	0.0499117	Vgll4
ENSMUSG00000042408	10.3432	-3.5299	0.983565	-3.58889	0.000332094	0.0513759	Zmym6
ENSMUSG00000005533	70.2055	1.22357	0.342319	3.57436	0.00035108	0.0529026	Igf1r
ENSMUSG00000083512	1.05541	2.27317	0.636173	3.5732	0.000352648	0.0529026	Gm12749
ENSMUSG00000023800	89.9054	1.5959	0.45104	3.53828	0.000402748	0.0595166	Tiam2
ENSMUSG00000086043	1.59249	2.55273	0.723079	3.53036	0.000415002	0.0604255	Gm12473
ENSMUSG00000082301	9.63866	-0.855246	0.242532	-3.52632	0.00042138	0.0604649	Gm14032
ENSMUSG00000027656	109.549	-2.64258	0.751383	-3.51695	0.000436539	0.0617454	Wisp2
ENSMUSG00000020717	1.18107	2.56199	0.731002	3.50477	0.000457007	0.0619839	Pecam1
ENSMUSG00000024074	51.9662	2.04426	0.582356	3.51033	0.000447547	0.0619839	Crim1
ENSMUSG00000025504	16.4962	3.78371	1.07915	3.50618	0.000454582	0.0619839	Eps8l2
ENSMUSG00000036916	5.9877	-2.98141	0.853083	-3.49487	0.000474296	0.0634595	Zfp280c
ENSMUSG00000047749	15.0487	2.71942	0.786974	3.45555	0.00054918	0.0724991	Zc3hav1l
ENSMUSG00000000938	18.2134	2.35182	0.686998	3.42333	0.000618593	0.0795414	Hoxa10
ENSMUSG00000021939	1173.02	-0.632156	0.184532	-3.42573	0.000613148	0.0795414	Ctsb
ENSMUSG00000092274	4393.38	1.01404	0.296672	3.41806	0.000630698	0.0800582	Neat1
ENSMUSG00000021091	106.75	-2.72609	0.801084	-3.403	0.000666496	0.0835314	Serpina3n
ENSMUSG00000044006	271.82	3.25371	0.960453	3.38769	0.000704841	0.0872329	Cilp2
ENSMUSG00000057637	48.4266	1.28488	0.379863	3.38248	0.000718338	0.0878057	Prdm2
ENSMUSG00000057531	63.7754	-1.4463	0.43183	-3.34923	0.000810353	0.0978452	Dtnbp1
ENSMUSG00000048581	6.64261	-3.26362	0.988003	-3.30325	0.000955706	0.114005	E130311K13Rik
ENSMUSG00000016255	0.979945	-1.30999	0.398376	-3.28832	0.00100786	0.118796	Tubb1
ENSMUSG00000034485	41.5403	1.93904	0.59086	3.28173	0.00103172	0.120177	Uaca
ENSMUSG00000042476	2.65908	3.15149	0.962983	3.27264	0.00106549	0.121258	Abcb4
ENSMUSG00000058922	2.46475	1.22653	0.374476	3.27532	0.00105541	0.121258	Gm10052
ENSMUSG00000029687	12.3705	2.22069	0.679385	3.26867	0.00108053	0.121572	Ezh2
ENSMUSG00000083834	2.58112	1.73556	0.533335	3.25417	0.00113725	0.126516	Gm12577
ENSMUSG00000017754	120.12	-1.66584	0.514514	-3.23769	0.001205	0.131107	Pltp
ENSMUSG00000040957	3.95292	3.00456	0.927662	3.23886	0.0012001	0.131107	Cables1
ENSMUSG00000054252	9.47932	3.56367	1.11017	3.21001	0.00132731	0.141309	Fgfr3
ENSMUSG00000071537	3.76517	2.90372	0.903786	3.21284	0.00131431	0.141309	Klrg2
ENSMUSG00000029373	0.996457	-1.90936	0.595959	-3.20384	0.00135609	0.142837	Pf4
ENSMUSG00000090150	1.67513	3.25037	1.02053	3.185	0.00144756	0.150866	Acad11
ENSMUSG00000027329	3.66874	-3.01489	0.947969	-3.18037	0.00147085	0.151697	Spef1
ENSMUSG00000022010	270.698	1.26813	0.403111	3.14586	0.00165602	0.169033	Tsc22d1
ENSMUSG00000019647	2.47982	3.00391	0.959579	3.13045	0.00174541	0.172813	Sema6a
ENSMUSG00000024077	24.079	2.06936	0.660944	3.13092	0.0017426	0.172813	Strn
ENSMUSG00000034602	42.509	1.13402	0.362176	3.13114	0.00174131	0.172813	Mon2
ENSMUSG00000032487	75.9845	-3.77991	1.21115	-3.12093	0.00180281	0.176729	Ptgs2
ENSMUSG00000020063	48.2481	1.31083	0.421407	3.1106	0.00186708	0.178232	Sirt1
ENSMUSG00000029838	13.0559	3.57377	1.15024	3.10697	0.00189014	0.178232	Ptn
ENSMUSG00000040732	22.8656	2.88937	0.929815	3.10746	0.001887	0.178232	Erg
ENSMUSG00000091313	0.935385	-1.42191	0.457468	-3.10821	0.00188225	0.178232	Fth-ps2
ENSMUSG00000028467	8.1725	2.77832	0.895183	3.10364	0.00191158	0.178552	Gba2
ENSMUSG00000027947	26.6919	-1.90332	0.614409	-3.09781	0.00194956	0.180398	Il6ra
ENSMUSG00000009013	67.8386	0.596411	0.194128	3.07226	0.00212446	0.184511	Dynll1
ENSMUSG00000017929	15.2012	-1.62942	0.529409	-3.07781	0.00208531	0.184511	B4galt5
ENSMUSG00000023224	1860.06	-1.36416	0.442792	-3.08083	0.00206426	0.184511	Serping1
ENSMUSG00000025393	354.38	0.497865	0.161792	3.07719	0.00208966	0.184511	Atp5b
ENSMUSG00000035310	6.47147	2.87862	0.936488	3.07385	0.00211315	0.184511	Lin54
ENSMUSG00000041164	38.0221	1.63174	0.531011	3.07289	0.00211996	0.184511	Zmiz2
ENSMUSG00000090247	7.35664	-1.07463	0.349534	-3.07447	0.0021088	0.184511	Bloc1s1
ENSMUSG00000023942	194.389	1.17489	0.383286	3.06531	0.00217446	0.185598	Slc29a1
ENSMUSG00000037552	48.2218	2.05509	0.669954	3.06751	0.00215848	0.185598	Plekhg2
ENSMUSG00000090958	15.7717	-2.95448	0.966896	-3.05563	0.00224585	0.190053	Lrrc32
ENSMUSG00000018537	3.26917	2.3124	0.758654	3.04803	0.00230344	0.190196	Pcgf2
ENSMUSG00000039145	79.079	1.22709	0.402615	3.04781	0.00230517	0.190196	Camk1d
ENSMUSG00000097366	0.642524	-1.77094	0.580905	-3.04859	0.00229919	0.190196	Gm8177
ENSMUSG00000030849	45.541	2.37218	0.780313	3.04003	0.00236554	0.193563	Fgfr2
ENSMUSG00000028195	570.081	1.36005	0.451804	3.01027	0.00261015	0.211829	Cyr61
ENSMUSG00000020810	101.643	-1.60304	0.533703	-3.00362	0.00266788	0.214753	Cygb
ENSMUSG00000005087	315.944	-0.983081	0.329741	-2.98138	0.00286957	0.227293	Cd44
ENSMUSG00000098470	1.40098	-1.52741	0.512244	-2.9818	0.00286562	0.227293	C1rb
ENSMUSG00000085925	15.0055	3.11232	1.04574	2.97618	0.00291866	0.229346	Rtl1
ENSMUSG00000026036	17.4604	3.14333	1.05718	2.97333	0.0029459	0.229664	Nif3l1
ENSMUSG00000029910	3.98227	1.99289	0.67155	2.9676	0.00300134	0.230359	Mad2l1
ENSMUSG00000074971	114.184	2.71333	0.913662	2.96973	0.00298063	0.230359	Fibin
ENSMUSG00000014158	24.455	3.36326	1.1343	2.96506	0.00302629	0.230487	Trpv4
ENSMUSG00000015846	45.3541	1.40886	0.476449	2.95701	0.00310637	0.233001	Rxra
ENSMUSG00000029649	37.6947	1.14887	0.388409	2.95789	0.00309755	0.233001	Pomp
ENSMUSG00000032420	149.17	2.04701	0.69478	2.94627	0.00321636	0.239438	Nt5e
ENSMUSG00000029718	675.028	-0.693761	0.236037	-2.93921	0.00329052	0.24313	Pcolce
ENSMUSG00000015932	433	0.677888	0.230964	2.93504	0.0033351	0.243748	Dstn
ENSMUSG00000025200	4.86771	3.05076	1.03997	2.93351	0.00335156	0.243748	Cwf19l1
ENSMUSG00000055172	74.9766	-1.46651	0.500636	-2.92929	0.00339736	0.243748	C1ra
ENSMUSG00000062825	6.55273	0.984487	0.335826	2.93154	0.0033729	0.243748	Actg1
ENSMUSG00000020381	5.07037	2.15791	0.737589	2.92563	0.00343761	0.244862	Mrnip
ENSMUSG00000041488	13.4174	-2.19784	0.754392	-2.91339	0.0035753	0.252531	Stx3
ENSMUSG00000046731	46.9015	-2.0227	0.694714	-2.91156	0.00359629	0.252531	Kctd11
ENSMUSG00000036533	41.663	2.01642	0.693888	2.90598	0.00366106	0.255269	Cdc42ep3
ENSMUSG00000020718	21.5652	1.94958	0.673656	2.89403	0.00380328	0.261502	Polg2
ENSMUSG00000040102	10.5753	2.55795	0.883386	2.89562	0.00378409	0.261502	Klhl42
ENSMUSG00000038859	10.6545	2.5152	0.870449	2.88954	0.00385809	0.263441	Baiap2l1
ENSMUSG00000030747	13.7515	2.34719	0.817922	2.8697	0.00410859	0.278049	Dgat2
ENSMUSG00000052085	15.4645	2.17542	0.758463	2.8682	0.00412818	0.278049	Dock8
ENSMUSG00000001119	809.503	0.766449	0.268366	2.85599	0.00429035	0.285093	Col6a1
ENSMUSG00000079018	318.767	-1.16707	0.408441	-2.85738	0.00427155	0.285093	Ly6c1
ENSMUSG00000022012	6.02686	2.73589	0.960808	2.84749	0.00440652	0.287179	Enox1
ENSMUSG00000031380	11.1064	-2.94886	1.03525	-2.84846	0.00439314	0.287179	Vegfd
ENSMUSG00000033538	14.0695	-2.20248	0.773525	-2.84733	0.00440876	0.287179	Casp4
ENSMUSG00000031839	63.183	0.843882	0.29694	2.84193	0.00448419	0.290183	Hsbp1
ENSMUSG00000000567	141.578	2.0095	0.709079	2.83396	0.00459752	0.295036	Sox9
ENSMUSG00000037573	150.872	0.938637	0.33151	2.8314	0.00463449	0.295036	Tob1
ENSMUSG00000060743	15.3047	0.597989	0.211271	2.83043	0.00464857	0.295036	H3f3a
ENSMUSG00000047767	15.4454	2.10853	0.746708	2.82376	0.00474637	0.299324	Atg16l2
ENSMUSG00000030218	599.51	1.49699	0.531681	2.81559	0.00486878	0.30407	Mgp
ENSMUSG00000083465	9.93733	1.00076	0.355554	2.81465	0.00488305	0.30407	Gm11652
ENSMUSG00000020473	437.468	-1.13581	0.404879	-2.80529	0.00502708	0.304829	Aebp1
ENSMUSG00000021876	485.51	-0.797267	0.283753	-2.80972	0.00495843	0.304829	Rnase4
ENSMUSG00000022584	1.82711	-1.15741	0.412514	-2.80576	0.00501981	0.304829	Ly6c2
ENSMUSG00000027878	193.658	0.774005	0.275943	2.80495	0.00503246	0.304829	Notch2
ENSMUSG00000083126	2.76857	-1.36072	0.485298	-2.80388	0.00504918	0.304829	Gm14109
ENSMUSG00000051223	98.7345	0.861002	0.307362	2.80126	0.0050903	0.305449	Bzw1
ENSMUSG00000024990	23.7077	3.5159	1.25703	2.79699	0.00515808	0.307652	Rbp4
ENSMUSG00000025355	15.1858	-2.19169	0.788107	-2.78096	0.00541989	0.307913	Mmp19
ENSMUSG00000027386	450.706	-1.21603	0.437577	-2.77902	0.00545232	0.307913	Fbln7
ENSMUSG00000027799	24.2454	1.77258	0.635032	2.79133	0.00524923	0.307913	Nbea
ENSMUSG00000030064	31.4938	1.87723	0.675746	2.77801	0.00546933	0.307913	Frmd4b
ENSMUSG00000030096	238.992	1.00699	0.36252	2.77776	0.00547345	0.307913	Slc6a6
ENSMUSG00000034858	19.7858	-1.49976	0.539009	-2.78244	0.00539523	0.307913	Fam214a
ENSMUSG00000041143	10.9625	2.34599	0.843039	2.78277	0.00538962	0.307913	Tmco4
ENSMUSG00000044813	3.89526	2.03288	0.729772	2.78564	0.0053422	0.307913	Shb
ENSMUSG00000056501	123.219	-0.983351	0.35234	-2.79092	0.0052559	0.307913	Cebpb
ENSMUSG00000073702	3.15013	1.17604	0.423057	2.77986	0.00543828	0.307913	Rpl31
ENSMUSG00000001870	191.238	-1.46936	0.529913	-2.77284	0.00555696	0.310844	Ltbp1
ENSMUSG00000017007	9.00628	2.39911	0.874355	2.74386	0.00607208	0.316419	Rbpjl
ENSMUSG00000022893	272.757	-1.27515	0.464622	-2.74448	0.00606069	0.316419	Adamts1
ENSMUSG00000026785	24.4071	2.60362	0.946851	2.74977	0.00596369	0.316419	Pkn3
ENSMUSG00000028339	79.6428	1.77618	0.643043	2.76215	0.00574221	0.316419	Col15a1
ENSMUSG00000031872	9.76334	-2.5898	0.942125	-2.74889	0.00597966	0.316419	Bean1
ENSMUSG00000035279	120.849	-1.06505	0.387922	-2.74554	0.00604117	0.316419	Ssc5d
ENSMUSG00000041741	13.7941	2.25711	0.819953	2.75273	0.00591003	0.316419	Pde3a
ENSMUSG00000042197	40.9745	-1.4003	0.508657	-2.75294	0.00590631	0.316419	Zfp451
ENSMUSG00000042404	5.81896	2.58642	0.935594	2.76447	0.00570157	0.316419	Dennd4b
ENSMUSG00000042793	9.13302	2.50776	0.913342	2.7457	0.00603817	0.316419	Lgr6
ENSMUSG00000053175	46.5949	-1.55198	0.564703	-2.74831	0.00599026	0.316419	Bcl3
ENSMUSG00000055771	5.59206	-1.02489	0.373079	-2.74711	0.00601221	0.316419	Gm7936
ENSMUSG00000106432	8.09468	2.80754	1.01947	2.75392	0.00588866	0.316419	Gm43259
ENSMUSG00000032855	451.657	0.733526	0.268163	2.73537	0.00623096	0.322999	Pkd1
ENSMUSG00000052912	0.919995	1.70242	0.626148	2.71887	0.00655044	0.336041	Smarca5-ps
ENSMUSG00000066607	4.5543	-1.64578	0.60506	-2.72003	0.00652751	0.336041	6030419C18Rik
ENSMUSG00000063362	14.1941	-2.10461	0.774806	-2.71631	0.00660144	0.336912	Alg11
ENSMUSG00000039220	35.1658	1.52639	0.563047	2.71094	0.00670928	0.338922	Ppp1r10
ENSMUSG00000072680	0.385625	-1.35908	0.501151	-2.71192	0.0066894	0.338922	Tmem254c
ENSMUSG00000024066	87.3541	-1.4775	0.546078	-2.70566	0.00681696	0.340927	Xdh
ENSMUSG00000050856	4.438	0.806502	0.298085	2.70561	0.00681785	0.340927	Atp5k
ENSMUSG00000014232	3.28631	2.52667	0.935448	2.70103	0.00691256	0.342206	Cluap1
ENSMUSG00000023336	18.8668	3.21488	1.19023	2.70105	0.00691218	0.342206	Wfdc1
ENSMUSG00000039208	188.374	-1.18811	0.440666	-2.69616	0.00701434	0.343807	Metrnl
ENSMUSG00000054408	54.2328	-1.04844	0.388837	-2.69635	0.0070103	0.343807	Spcs3
ENSMUSG00000000628	56.5488	-1.43037	0.531999	-2.68867	0.00717381	0.346478	Hk2
ENSMUSG00000014767	6.38426	2.3087	0.85817	2.69025	0.00713975	0.346478	Tbp
ENSMUSG00000031431	127.252	1.23919	0.460772	2.68939	0.00715828	0.346478	Tsc22d3
ENSMUSG00000023169	42.0476	2.88138	1.07625	2.67723	0.00742337	0.355067	Slc38a1
ENSMUSG00000037405	124.082	-2.15666	0.805352	-2.67791	0.00740842	0.355067	Icam1
ENSMUSG00000030717	241.932	0.757497	0.283338	2.67348	0.00750691	0.356521	Nupr1
ENSMUSG00000037411	126.615	1.43894	0.538396	2.67264	0.0075258	0.356521	Serpine1
ENSMUSG00000020747	22.8617	1.82889	0.687676	2.65953	0.00782501	0.364369	Tmem94
ENSMUSG00000024050	13.116	1.77834	0.66958	2.6559	0.00790969	0.364369	Wiz
ENSMUSG00000025185	16.6633	2.76666	1.03868	2.66364	0.00772999	0.364369	Loxl4
ENSMUSG00000027447	1766.49	0.672662	0.2531	2.65769	0.00786783	0.364369	Cst3
ENSMUSG00000032324	353.482	0.548119	0.205971	2.66115	0.00778744	0.364369	Tspan3
ENSMUSG00000097961	2.45788	1.87856	0.707343	2.65579	0.00791226	0.364369	Gm27000
ENSMUSG00000019850	31.4266	-1.95117	0.738274	-2.64288	0.00822032	0.365513	Tnfaip3
ENSMUSG00000022438	1.90197	-2.13042	0.809232	-2.63265	0.00847221	0.365513	Parvb
ENSMUSG00000023965	21.6411	1.34424	0.509314	2.63931	0.0083075	0.365513	Fbxl17
ENSMUSG00000025503	41.5403	1.10499	0.417849	2.64448	0.00818176	0.365513	Taldo1
ENSMUSG00000027544	82.0253	2.2004	0.833275	2.64067	0.00827421	0.365513	Nfatc2
ENSMUSG00000028680	31.4097	1.63141	0.617374	2.64249	0.0082298	0.365513	Plk3
ENSMUSG00000031119	31.1604	-1.70611	0.648242	-2.6319	0.00849086	0.365513	Gpc4
ENSMUSG00000032064	37.5633	2.12907	0.805414	2.64344	0.00820675	0.365513	Dixdc1
ENSMUSG00000050900	5.52456	-1.42347	0.538999	-2.64095	0.00826742	0.365513	Gm7327
ENSMUSG00000051910	31.096	1.93633	0.730537	2.65056	0.00803589	0.365513	Sox6
ENSMUSG00000083899	21.5941	0.671514	0.253385	2.65017	0.00804513	0.365513	Gm12346
ENSMUSG00000090737	4.33151	0.612612	0.231788	2.64298	0.00821793	0.365513	Gm6788
ENSMUSG00000097451	76.694	2.19677	0.834576	2.6322	0.00848332	0.365513	Rian
ENSMUSG00000097589	25.8942	1.41169	0.535353	2.63694	0.00836584	0.365513	Dleu2
ENSMUSG00000102854	8.31566	2.71862	1.03161	2.63531	0.00840608	0.365513	C130023A14Rik
ENSMUSG00000021065	31.6667	1.34962	0.514354	2.62391	0.00869265	0.36835	Fut8
ENSMUSG00000024063	5.84498	2.16228	0.823961	2.62425	0.008684	0.36835	Lbh
ENSMUSG00000029056	13.2918	-2.17268	0.827192	-2.62658	0.00862479	0.36835	Pank4
ENSMUSG00000033526	6.75864	2.16331	0.824618	2.6234	0.00870558	0.36835	Ppip5k1
ENSMUSG00000018565	22.3474	1.73002	0.662081	2.613	0.00897506	0.371654	Elp5
ENSMUSG00000032740	37.5167	1.14095	0.435782	2.61817	0.0088402	0.371654	Ccdc88a
ENSMUSG00000040435	293.854	0.87703	0.335974	2.61041	0.00904329	0.371654	Ppp1r15a
ENSMUSG00000051627	3.00951	2.06124	0.790088	2.60888	0.00908397	0.371654	Hist1h1e
ENSMUSG00000073643	27.0281	1.55814	0.59534	2.61724	0.00886449	0.371654	Wdfy1
ENSMUSG00000079037	270.115	-0.662267	0.253192	-2.61567	0.00890525	0.371654	Prnp
ENSMUSG00000095440	5.88552	-1.03481	0.396586	-2.60929	0.00907299	0.371654	Fignl2
ENSMUSG00000104141	1.01858	1.08703	0.416325	2.61102	0.00902723	0.371654	Gm6140
ENSMUSG00000061353	189.903	-1.13679	0.436003	-2.6073	0.009126	0.371838	Cxcl12
ENSMUSG00000032020	3.01525	-2.26441	0.86932	-2.60481	0.00919256	0.373014	Ubash3b
ENSMUSG00000039221	5.80919	-0.986062	0.379202	-2.60036	0.00931257	0.376342	Rpl22l1
ENSMUSG00000078982	2.36503	1.08874	0.419726	2.59392	0.00948879	0.381265	Gm11025
ENSMUSG00000096544	10.3532	0.564299	0.217615	2.5931	0.00951141	0.381265	Gm4617
ENSMUSG00000002012	89.9988	-0.360073	0.138984	-2.59074	0.00957686	0.382341	Pnck
ENSMUSG00000000320	9.35509	1.43608	0.555779	2.5839	0.00976889	0.386153	Alox12
ENSMUSG00000029726	12.5386	1.76626	0.683127	2.58555	0.00972232	0.386153	Mepce
ENSMUSG00000046056	70.0702	1.59801	0.61862	2.58318	0.00978935	0.386153	Sbsn
ENSMUSG00000038521	198.968	-1.6667	0.646447	-2.57825	0.00993016	0.387081	C1s1
ENSMUSG00000046169	16.5572	2.18519	0.847135	2.57951	0.00989403	0.387081	Adamts6
ENSMUSG00000047888	52.1645	0.957853	0.371166	2.58066	0.00986126	0.387081	Tnrc6b
ENSMUSG00000030872	30.2174	1.62367	0.63152	2.57105	0.010139	0.389934	Gga2
ENSMUSG00000038866	14.0357	1.73065	0.673005	2.57153	0.0101251	0.389934	Zcchc2
ENSMUSG00000055866	17.9441	1.91259	0.74411	2.57031	0.0101609	0.389934	Per2
ENSMUSG00000058624	73.4048	-1.20394	0.468063	-2.57217	0.0101063	0.389934	Gda
ENSMUSG00000042834	36.5509	1.55885	0.606802	2.56895	0.0102006	0.389946	Nrep
ENSMUSG00000030123	11.3312	-2.30205	0.896918	-2.56663	0.0102693	0.391062	Plxnd1
ENSMUSG00000025153	69.435	-1.11909	0.436821	-2.56189	0.0104105	0.393412	Fasn
ENSMUSG00000035877	79.5906	0.901751	0.351879	2.56268	0.0103869	0.393412	Zhx3
ENSMUSG00000032422	17.0037	1.53736	0.602322	2.55238	0.0106989	0.401175	Snx14
ENSMUSG00000041559	3258.3	1.84318	0.722185	2.55222	0.0107038	0.401175	Fmod
ENSMUSG00000106459	0.643835	-1.77051	0.694008	-2.55113	0.0107374	0.401175	Gm43245
ENSMUSG00000028763	600.843	0.522481	0.205001	2.54867	0.0108133	0.402492	Hspg2
ENSMUSG00000015165	40.869	0.794422	0.31325	2.53606	0.0112107	0.40679	Hnrnpl
ENSMUSG00000021945	30.2322	1.27757	0.503442	2.53767	0.0111592	0.40679	Zmym2
ENSMUSG00000022548	426.846	-1.88738	0.742398	-2.54228	0.0110133	0.40679	Apod
ENSMUSG00000026042	361.059	0.70504	0.278026	2.53588	0.0112164	0.40679	Col5a2
ENSMUSG00000037426	10.2111	2.04961	0.807019	2.53973	0.0110937	0.40679	Depdc5
ENSMUSG00000056174	23.8318	2.45487	0.96759	2.5371	0.0111774	0.40679	Col8a2
ENSMUSG00000062647	16.3975	0.543671	0.214105	2.53927	0.0111085	0.40679	Rpl7a
ENSMUSG00000029578	60.7625	1.10399	0.437077	2.52585	0.011542	0.415858	Wipi2
ENSMUSG00000045672	15.5212	2.09108	0.828377	2.52431	0.0115925	0.415858	Col27a1
ENSMUSG00000071415	32.9956	-0.401643	0.15906	-2.5251	0.0115665	0.415858	Rpl23
ENSMUSG00000041324	128.859	-1.69704	0.672675	-2.52282	0.0116418	0.416121	Inhba
ENSMUSG00000022146	154.157	-1.05136	0.418273	-2.51358	0.0119513	0.422932	Osmr
ENSMUSG00000025068	39.4699	2.03194	0.809873	2.50896	0.0121087	0.422932	Gsto1
ENSMUSG00000027828	149.142	-0.555834	0.221102	-2.51393	0.0119393	0.422932	Ssr3
ENSMUSG00000032679	17.0527	2.61817	1.04339	2.50931	0.0120969	0.422932	Cd59a
ENSMUSG00000041120	911.965	-0.67804	0.270266	-2.50879	0.0121147	0.422932	Nbl1
ENSMUSG00000043872	4.99182	2.16947	0.865069	2.50786	0.0121463	0.422932	Zmym1
ENSMUSG00000045007	3.13388	-2.44221	0.973553	-2.50856	0.0121226	0.422932	Tubg2
ENSMUSG00000054150	61.7681	-1.31746	0.525502	-2.50706	0.0121741	0.422932	Syne3
ENSMUSG00000005813	20.2567	-1.42324	0.568279	-2.50448	0.0122632	0.424538	Metap1
ENSMUSG00000021366	79.3119	1.08667	0.435302	2.49636	0.0125473	0.428423	Hivep1
ENSMUSG00000031451	184.132	-1.27303	0.510117	-2.49556	0.0125758	0.428423	Gas6
ENSMUSG00000038738	1.60628	1.69811	0.680433	2.49564	0.0125731	0.428423	Shank1
ENSMUSG00000040249	1987.51	-0.349773	0.140183	-2.49511	0.0125918	0.428423	Lrp1
ENSMUSG00000044337	560.32	-0.892654	0.357541	-2.49665	0.0125374	0.428423	Ackr3
ENSMUSG00000002881	22.4938	-1.48279	0.597068	-2.48345	0.0130117	0.432238	Nab1
ENSMUSG00000009927	1.73528	0.822571	0.331372	2.48232	0.0130531	0.432238	Rps25
ENSMUSG00000028161	104.468	0.810932	0.325753	2.48941	0.0127955	0.432238	Ppp3ca
ENSMUSG00000028341	104.293	-1.34452	0.540766	-2.48632	0.0129071	0.432238	Nr4a3
ENSMUSG00000029504	4.20458	2.53757	1.02062	2.48631	0.0129076	0.432238	Ddx51
ENSMUSG00000032599	3.41912	-2.12667	0.854611	-2.48847	0.0128295	0.432238	Ip6k2
ENSMUSG00000071648	15.7534	2.68485	1.08114	2.48334	0.0130157	0.432238	Rom1
ENSMUSG00000081232	2.5605	-1.69152	0.681147	-2.48334	0.0130157	0.432238	Gm14373
ENSMUSG00000048387	16.4347	-2.29508	0.925527	-2.47975	0.0131473	0.433636	Osr1
ENSMUSG00000075602	544.405	-0.968831	0.390849	-2.47879	0.013183	0.433636	Ly6a
ENSMUSG00000021464	9.03537	-2.28869	0.92534	-2.47336	0.0133851	0.43594	Ror2
ENSMUSG00000028788	57.6876	-0.654154	0.26436	-2.47448	0.013343	0.43594	Ptp4a2
ENSMUSG00000055835	5.42902	2.63168	1.06302	2.47566	0.0132991	0.43594	Zfp1
ENSMUSG00000017897	25.6404	2.87618	1.16664	2.46535	0.0136879	0.444342	Eya2
ENSMUSG00000020888	11.1507	1.85779	0.754989	2.46068	0.0138673	0.448694	Dvl2
ENSMUSG00000022545	4.36296	-2.3974	0.975207	-2.45835	0.0139577	0.449004	Ercc4
ENSMUSG00000027962	31.8292	-1.96743	0.800487	-2.45779	0.0139795	0.449004	Vcam1
ENSMUSG00000090136	1.79405	-0.82974	0.337714	-2.45693	0.014013	0.449004	Gm10177
ENSMUSG00000020241	819.496	0.65367	0.266356	2.45412	0.0141228	0.449615	Col6a2
ENSMUSG00000049477	1.34252	1.43097	0.583072	2.45419	0.0141204	0.449615	Gm8508
ENSMUSG00000055435	12.0905	1.74937	0.714955	2.44683	0.014412	0.457349	Maf
ENSMUSG00000047675	14.5541	0.471783	0.19313	2.44283	0.0145725	0.459497	Rps8
ENSMUSG00000059824	80.3154	0.90445	0.37021	2.44307	0.0145629	0.459497	Dbp
ENSMUSG00000048878	47.4267	0.981586	0.402344	2.43967	0.0147008	0.462073	Hexim1
ENSMUSG00000090074	0.839882	-1.6092	0.660776	-2.43533	0.0148784	0.466175	Gm6921
ENSMUSG00000002496	40.2255	1.21316	0.498633	2.43296	0.0149759	0.466276	Tsc2
ENSMUSG00000020546	5.38514	2.58034	1.06017	2.43388	0.0149378	0.466276	Stxbp4
ENSMUSG00000027611	158.467	-1.52135	0.626573	-2.42804	0.0151806	0.47117	Procr
ENSMUSG00000015085	54.3628	-1.69749	0.700118	-2.42457	0.0153264	0.471724	Entpd2
ENSMUSG00000038296	16.1928	2.63174	1.0856	2.42422	0.0153414	0.471724	Galnt18
ENSMUSG00000056602	50.3215	1.93032	0.795542	2.42642	0.0152488	0.471724	Fry
ENSMUSG00000027750	71.7378	3.0068	1.24205	2.42084	0.0154846	0.474653	Postn
ENSMUSG00000020528	3.63958	2.0592	0.852898	2.41436	0.015763	0.480214	Prpsap2
ENSMUSG00000056492	0.602984	-1.95085	0.807733	-2.41522	0.0157257	0.480214	Adgrf5
ENSMUSG00000026566	39.0686	2.2152	0.92066	2.4061	0.016124	0.486718	Mpzl1
ENSMUSG00000039987	31.2411	1.48506	0.617044	2.40673	0.0160963	0.486718	Phtf2
ENSMUSG00000040363	39.8223	-1.15058	0.477777	-2.40819	0.0160318	0.486718	Bcor
ENSMUSG00000003378	11.312	2.09745	0.873105	2.40229	0.0162927	0.487354	Grik5
ENSMUSG00000028163	141.704	-0.969602	0.403386	-2.40366	0.016232	0.487354	Nfkb1
ENSMUSG00000071645	6.47665	-2.52523	1.05109	-2.40247	0.0162846	0.487354	Tut1
ENSMUSG00000029767	387.78	-0.482666	0.201153	-2.39949	0.0164179	0.489618	Calu
ENSMUSG00000001741	36.3457	1.32216	0.55508	2.38193	0.0172221	0.509002	Il16
ENSMUSG00000021457	5.2791	-2.34603	0.984857	-2.3821	0.0172141	0.509002	Syk
ENSMUSG00000078786	3.35079	1.97873	0.830304	2.38314	0.0171657	0.509002	BC024978
ENSMUSG00000031239	94.0167	1.79123	0.752829	2.37933	0.017344	0.511079	Itm2a
ENSMUSG00000039529	20.6191	-2.0061	0.843976	-2.37697	0.0174556	0.512844	Atp8b1
ENSMUSG00000021277	30.1254	1.30351	0.549486	2.37223	0.0176813	0.517084	Traf3
ENSMUSG00000103622	9.47735	2.11646	0.892363	2.37174	0.0177044	0.517084	Gm38391
ENSMUSG00000029406	28.314	1.21608	0.513539	2.36803	0.017883	0.520763	Pitpnm2
ENSMUSG00000008450	5.57379	2.29252	0.969033	2.36578	0.0179921	0.521437	Nutf2
ENSMUSG00000026223	229.564	0.674893	0.285321	2.36538	0.0180114	0.521437	Itm2c
ENSMUSG00000038248	27.5162	0.994556	0.420724	2.36392	0.0180828	0.521977	Sobp
ENSMUSG00000022708	544.399	0.440091	0.186599	2.35848	0.0183499	0.523239	Zbtb20
ENSMUSG00000032514	7.7611	1.76285	0.747713	2.35765	0.0183908	0.523239	Ttc21a
ENSMUSG00000045896	7.21348	1.20839	0.512509	2.35779	0.0183843	0.523239	Paip2b
ENSMUSG00000048965	7.92535	1.03529	0.439092	2.35779	0.0183842	0.523239	Mrgpre
ENSMUSG00000083289	2.50016	1.2779	0.541927	2.35806	0.0183706	0.523239	Gm8812
ENSMUSG00000020122	221.248	-0.791011	0.336499	-2.35071	0.0187379	0.524559	Egfr
ENSMUSG00000022661	18.329	2.25321	0.958889	2.34982	0.0187827	0.524559	Cd200
ENSMUSG00000037375	11.1694	2.39962	1.0195	2.35373	0.0185863	0.524559	Hhat
ENSMUSG00000042292	8.12196	-1.43146	0.609308	-2.34931	0.0188081	0.524559	Mkl1
ENSMUSG00000055148	356.501	0.9673	0.411488	2.35074	0.0187363	0.524559	Klf2
ENSMUSG00000064340	1.23387	1.2715	0.539768	2.35563	0.0184912	0.524559	mt-Tl1
ENSMUSG00000091537	4.24666	0.885457	0.376719	2.35045	0.0187509	0.524559	Tma7
ENSMUSG00000021339	7.10751	1.77942	0.758422	2.34622	0.018965	0.525974	Mrs2
ENSMUSG00000081656	0.592412	1.16772	0.497494	2.34719	0.0189154	0.525974	Gm11246
ENSMUSG00000008730	62.7069	0.884585	0.37741	2.34383	0.0190869	0.526637	Hipk1
ENSMUSG00000064337	830.149	-0.27594	0.117759	-2.34326	0.0191161	0.526637	mt-Rnr1
ENSMUSG00000064343	0.672145	1.41261	0.603003	2.34263	0.0191485	0.526637	mt-Tq
ENSMUSG00000020889	310.61	0.720672	0.308398	2.33682	0.0194485	0.531933	Nr1d1
ENSMUSG00000047153	9.4082	2.33762	1.00011	2.33737	0.0194198	0.531933	Khnyn
ENSMUSG00000000568	27.1936	0.970411	0.417559	2.32401	0.020125	0.533996	Hnrnpd
ENSMUSG00000013698	74.1156	1.00434	0.432785	2.32065	0.0203055	0.533996	Pea15a
ENSMUSG00000014301	0.83358	1.92788	0.826197	2.33343	0.0196254	0.533996	Pam16
ENSMUSG00000019970	389.942	0.828849	0.355931	2.32868	0.0198759	0.533996	Sgk1
ENSMUSG00000022124	31.9568	0.939942	0.403701	2.32831	0.0198955	0.533996	Fbxl3
ENSMUSG00000024420	77.5452	0.98202	0.423006	2.32153	0.0202582	0.533996	Zfp521
ENSMUSG00000026701	110.361	0.800512	0.344806	2.32163	0.0202528	0.533996	Prdx6
ENSMUSG00000026782	26.7335	1.14143	0.491963	2.32015	0.0203329	0.533996	Abi2
ENSMUSG00000030124	8.11689	1.89942	0.818565	2.32043	0.0203176	0.533996	Lag3
ENSMUSG00000031988	17.1619	1.55994	0.670104	2.32791	0.0199171	0.533996	Vps26b
ENSMUSG00000032006	4.18693	2.38402	1.02693	2.3215	0.0202597	0.533996	Pdgfd
ENSMUSG00000032340	63.8071	1.13969	0.489882	2.32647	0.0199937	0.533996	Neo1
ENSMUSG00000034810	19.8024	-2.81581	1.21108	-2.32504	0.0200697	0.533996	Scn7a
ENSMUSG00000051518	6.12315	2.14512	0.920252	2.33102	0.0197525	0.533996	Rps19bp1
ENSMUSG00000092193	62.7675	0.424066	0.182519	2.3234	0.0201574	0.533996	Cd9-ps
ENSMUSG00000026335	631.133	0.4781	0.206178	2.31887	0.0204019	0.534389	Pam
ENSMUSG00000020363	891.948	-0.812765	0.351008	-2.31552	0.0205847	0.537754	Gfpt2
ENSMUSG00000025213	25.1557	1.74708	0.756218	2.31028	0.0208725	0.540042	Kazald1
ENSMUSG00000039232	11.3298	-1.42397	0.615866	-2.31214	0.02077	0.540042	Stx11
ENSMUSG00000073147	12.6037	1.34203	0.580708	2.31102	0.0208317	0.540042	5031425E22Rik
ENSMUSG00000084153	5.46211	0.68444	0.2963	2.30996	0.0208904	0.540042	Gm12186
ENSMUSG00000042331	6.73615	2.04891	0.888298	2.30656	0.0210792	0.542091	Specc1
ENSMUSG00000090137	4.69515	-0.939462	0.407247	-2.30686	0.0210627	0.542091	Uba52
ENSMUSG00000012428	15.7653	-2.83098	1.22938	-2.30277	0.0212915	0.546134	Steap4
ENSMUSG00000080877	3.07124	-0.636913	0.27686	-2.30049	0.0214206	0.546611	Rpl22-ps1
ENSMUSG00000091845	1.01511	-0.976998	0.424534	-2.30134	0.0213723	0.546611	Rpl36-ps12
ENSMUSG00000020003	14.7556	-1.79898	0.783409	-2.29634	0.0216563	0.550511	Pex7
ENSMUSG00000020105	19.7148	1.48997	0.648983	2.29585	0.0216846	0.550511	Lrig3
ENSMUSG00000024163	22.9383	1.08133	0.472158	2.29018	0.0220109	0.552546	Mapk8ip3
ENSMUSG00000028134	15.3447	1.14822	0.501351	2.29025	0.0220068	0.552546	Ptbp2
ENSMUSG00000041453	5.02982	1.13726	0.496228	2.29181	0.0219169	0.552546	Rpl21
ENSMUSG00000048200	11.1831	2.29222	0.999641	2.29304	0.0218455	0.552546	Cracr2b
ENSMUSG00000079491	0.540266	-1.56884	0.6852	-2.28961	0.0220438	0.552546	H2-T10
ENSMUSG00000009291	329.077	-0.502463	0.219966	-2.28428	0.022355	0.553599	Pttg1ip
ENSMUSG00000024335	211.349	0.625859	0.274356	2.2812	0.0225368	0.553599	Brd2
ENSMUSG00000029390	19.2591	0.433571	0.189792	2.28445	0.0223452	0.553599	Tmed2
ENSMUSG00000030878	55.5804	-1.284	0.562897	-2.28106	0.0225452	0.553599	Cdr2
ENSMUSG00000031075	24.1764	2.66732	1.16827	2.28315	0.0224217	0.553599	Ano1
ENSMUSG00000056851	40.5245	0.551655	0.24112	2.28788	0.0221442	0.553599	Pcbp2
ENSMUSG00000078671	45.2784	0.971478	0.426028	2.28031	0.022589	0.553599	Chd2
ENSMUSG00000081485	0.392803	-1.09723	0.481066	-2.28084	0.022558	0.553599	Gm12338
ENSMUSG00000089855	6.20864	0.481043	0.210918	2.28071	0.0225658	0.553599	Gm15662
ENSMUSG00000050761	0.624773	1.23785	0.544247	2.27443	0.0229402	0.560817	Gp1bb
ENSMUSG00000026349	33.4684	1.15733	0.510124	2.26872	0.0232853	0.563686	Ccnt2
ENSMUSG00000036552	4.97911	1.91778	0.84455	2.27077	0.0231609	0.563686	Ermard
ENSMUSG00000040842	8.9373	1.10194	0.485583	2.26932	0.0232489	0.563686	Szrd1
ENSMUSG00000068328	42.245	0.891694	0.392879	2.26964	0.0232296	0.563686	Aup1
ENSMUSG00000062098	32.1637	1.63465	0.721156	2.26671	0.0234078	0.56527	Btbd3
ENSMUSG00000020156	35.5904	1.62765	0.71966	2.26169	0.0237166	0.566495	Mum1
ENSMUSG00000028538	8.96703	-1.82866	0.807503	-2.26458	0.0235384	0.566495	St3gal3
ENSMUSG00000034947	20.6118	-1.78881	0.790957	-2.26158	0.0237235	0.566495	Tmem106a
ENSMUSG00000057605	0.853356	-1.02187	0.451707	-2.26224	0.0236825	0.566495	Gm6807
ENSMUSG00000085711	3.35476	1.68369	0.744586	2.26124	0.0237446	0.566495	Gm15163
ENSMUSG00000015305	141.143	-0.862433	0.381994	-2.25771	0.0239634	0.57025	Sash1
ENSMUSG00000029563	8.27002	-2.30395	1.02087	-2.25685	0.0240172	0.57025	Foxp2
ENSMUSG00000039115	32.6491	1.29484	0.574046	2.25564	0.024093	0.570681	Itga9
ENSMUSG00000022425	244.687	-1.34556	0.597028	-2.25376	0.0242113	0.570789	Enpp2
ENSMUSG00000032440	181.421	-0.746391	0.33118	-2.25373	0.0242129	0.570789	Tgfbr2
ENSMUSG00000030674	20.3022	-2.08834	0.927376	-2.25188	0.0243297	0.572181	Qprt
ENSMUSG00000003665	1516.56	-1.04065	0.462345	-2.25081	0.0243977	0.572422	Has1
ENSMUSG00000001131	104.397	-1.19217	0.530467	-2.24741	0.024614	0.57613	Timp1
ENSMUSG00000058833	28.4644	-0.833163	0.370957	-2.24598	0.0247051	0.576898	Rex1bd
ENSMUSG00000064899	0.786346	1.49407	0.665657	2.24451	0.0247997	0.577745	Snord118
ENSMUSG00000024909	88.5714	-0.824053	0.36767	-2.24129	0.0250076	0.579818	Efemp2
ENSMUSG00000030342	550.356	0.390931	0.17464	2.2385	0.0251887	0.579818	Cd9
ENSMUSG00000038095	72.0842	0.849244	0.379515	2.23771	0.02524	0.579818	Sbno1
ENSMUSG00000039126	37.2953	-1.68815	0.753846	-2.23938	0.0251311	0.579818	Prune2
ENSMUSG00000052911	422.406	-0.45182	0.201908	-2.23775	0.0252377	0.579818	Lamb2
ENSMUSG00000096255	1.64979	1.2022	0.536994	2.23876	0.0251715	0.579818	Dynlt1
ENSMUSG00000019338	4.86441	2.00775	0.898979	2.23336	0.025525	0.580972	Zfp687
ENSMUSG00000043241	13.1256	1.41313	0.63198	2.23604	0.0253492	0.580972	Upf2
ENSMUSG00000047747	7.61868	-2.36534	1.05902	-2.23353	0.0255142	0.580972	Rnf150
ENSMUSG00000082896	3.7204	0.746494	0.334116	2.23423	0.0254678	0.580972	Gm5844
ENSMUSG00000082013	0.945781	1.49095	0.667927	2.2322	0.0256015	0.581378	Gm13216
ENSMUSG00000023092	460.35	-0.781582	0.350437	-2.23031	0.025727	0.581572	Fhl1
ENSMUSG00000028469	46.3824	1.31013	0.587423	2.2303	0.0257275	0.581572	Npr2
ENSMUSG00000041702	35.3152	0.905774	0.406647	2.22742	0.0259192	0.584569	Btbd7
ENSMUSG00000003477	60.7646	-3.06492	1.38077	-2.21972	0.0264376	0.585858	Inmt
ENSMUSG00000024132	29.4972	1.27366	0.572921	2.2231	0.0262089	0.585858	Eci1
ENSMUSG00000026707	4.43607	2.31395	1.04045	2.22398	0.0261499	0.585858	Nsun6
ENSMUSG00000026839	2.54977	1.98651	0.893051	2.22441	0.0261211	0.585858	Upp2
ENSMUSG00000028820	98.241	0.559149	0.251921	2.21954	0.0264497	0.585858	Sfpq
ENSMUSG00000035372	71.67	1.02774	0.462467	2.2223	0.0262632	0.585858	1810055G02Rik
ENSMUSG00000060591	103.548	-0.337866	0.15222	-2.2196	0.0264461	0.585858	Ifitm2
ENSMUSG00000094936	4.42259	-1.98455	0.893956	-2.21996	0.0264216	0.585858	Rbm4
ENSMUSG00000040663	11.869	-2.0785	0.937373	-2.21737	0.0265978	0.586514	Clcf1
ENSMUSG00000055413	0.739014	-1.08979	0.491464	-2.21744	0.0265933	0.586514	H2-Q5
ENSMUSG00000047368	8.86592	2.06513	0.933241	2.21286	0.0269076	0.592027	Abhd17b
ENSMUSG00000052957	546.482	0.720221	0.32565	2.21164	0.0269915	0.592557	Gas1
ENSMUSG00000090210	15.0534	1.51016	0.683815	2.20843	0.0272142	0.596124	Itga10
ENSMUSG00000094790	0.979434	0.977789	0.443003	2.20718	0.0273013	0.59671	Gm6625
ENSMUSG00000082906	1.6179	-0.913249	0.414348	-2.20406	0.0275199	0.600164	Smt3h1-ps
ENSMUSG00000021822	98.8976	-1.86264	0.847329	-2.19825	0.0279313	0.600918	Plau
ENSMUSG00000026103	213.806	0.586749	0.266465	2.20197	0.0276673	0.600918	Gls
ENSMUSG00000031714	32.1386	1.47034	0.669206	2.19715	0.02801	0.600918	Gab1
ENSMUSG00000031980	10.5318	2.49053	1.13255	2.19904	0.0278751	0.600918	Agt
ENSMUSG00000039834	7.72609	-1.69273	0.769616	-2.19945	0.0278456	0.600918	Zfp335
ENSMUSG00000048175	10.7896	-2.43895	1.1085	-2.20022	0.0277914	0.600918	Asb8
ENSMUSG00000058927	1.04801	1.04693	0.47574	2.20063	0.0277625	0.600918	Gm10053
ENSMUSG00000097059	2.76207	-1.74764	0.795564	-2.19673	0.02804	0.600918	Fam120aos
ENSMUSG00000014956	76.8592	0.74208	0.338242	2.19393	0.0282404	0.601308	Ppp1cb
ENSMUSG00000026365	387.598	-1.21794	0.554947	-2.1947	0.0281851	0.601308	Cfh
ENSMUSG00000074918	5.30718	1.38593	0.631305	2.19534	0.0281395	0.601308	Inafm2
ENSMUSG00000079343	0.627092	-1.28681	0.586961	-2.19233	0.0283555	0.602463	C1s2
ENSMUSG00000002602	342.102	-0.558132	0.254697	-2.19136	0.028426	0.602667	Axl
ENSMUSG00000019261	9.23432	-1.9564	0.893128	-2.1905	0.0284877	0.602684	Map1s
ENSMUSG00000067212	44.2798	-1.1517	0.526018	-2.18946	0.0285633	0.602997	H2-T23
ENSMUSG00000035382	11.7193	-1.7331	0.792221	-2.18764	0.0286956	0.604501	Pcsk7
ENSMUSG00000027551	8.98299	2.13542	0.976525	2.18676	0.0287604	0.604579	Zfp64
ENSMUSG00000026082	18.4225	1.21363	0.555332	2.18541	0.0288588	0.605362	Rev1
ENSMUSG00000059588	106.357	-1.96157	0.898089	-2.18416	0.0289504	0.606	Calcrl
ENSMUSG00000020115	14.1928	-1.33901	0.61348	-2.18265	0.0290615	0.607041	Tbk1
ENSMUSG00000000149	33.8188	1.18765	0.547223	2.17032	0.0299823	0.607057	Gna12
ENSMUSG00000002897	19.0848	-1.54893	0.713058	-2.17223	0.0298382	0.607057	Il17ra
ENSMUSG00000004100	11.772	-1.74862	0.803066	-2.17742	0.0294489	0.607057	Ppan
ENSMUSG00000020359	35.5762	1.11076	0.511777	2.1704	0.0299765	0.607057	Phykpl
ENSMUSG00000021975	17.201	1.74073	0.801415	2.17207	0.0298501	0.607057	Ints9
ENSMUSG00000029673	52.5118	0.806251	0.371626	2.16952	0.0300432	0.607057	Auts2
ENSMUSG00000031838	34.6631	1.15246	0.529549	2.17631	0.0295321	0.607057	Ifi30
ENSMUSG00000032220	39.8883	0.996546	0.458282	2.17453	0.0296654	0.607057	Myo1e
ENSMUSG00000032666	32.0541	1.12842	0.519875	2.17057	0.029964	0.607057	1700025G04Rik
ENSMUSG00000033161	120.66	0.652696	0.300239	2.17393	0.0297108	0.607057	Atp1a1
ENSMUSG00000034203	5.73166	2.01658	0.927054	2.17526	0.029611	0.607057	Chchd4
ENSMUSG00000040152	814.946	1.39361	0.639224	2.18016	0.0292455	0.607057	Thbs1
ENSMUSG00000057315	37.533	-1.44526	0.664108	-2.17624	0.0295375	0.607057	Arhgap24
ENSMUSG00000062083	6.93862	-0.399019	0.183719	-2.1719	0.0298635	0.607057	Rpl13a-ps1
ENSMUSG00000087201	3.52098	2.18027	1.00068	2.1788	0.0293468	0.607057	Gm15261
ENSMUSG00000090389	0.885464	-1.32765	0.610713	-2.17393	0.0297104	0.607057	Cdv3-ps
ENSMUSG00000029049	8.20133	1.8239	0.841231	2.16813	0.030149	0.607954	Morn1
ENSMUSG00000087604	1.19294	0.819776	0.378247	2.1673	0.0302118	0.607983	Cdrt4os1
ENSMUSG00000020773	105.434	1.01863	0.471277	2.16143	0.0306622	0.615794	Trim47
ENSMUSG00000067818	4.50726	1.26658	0.586718	2.15875	0.0308692	0.618697	Myl9
ENSMUSG00000034317	5.87832	2.051	0.950743	2.15726	0.0309855	0.619772	Trim59
ENSMUSG00000029119	37.3714	-1.10402	0.512811	-2.15287	0.0313289	0.624069	Man2b2
ENSMUSG00000030159	0.419078	-1.11604	0.519125	-2.14985	0.0315674	0.624069	Clec1b
ENSMUSG00000034640	105.158	-0.92453	0.430073	-2.14971	0.0315785	0.624069	Tiparp
ENSMUSG00000036249	8.51047	2.30176	1.06994	2.1513	0.0314529	0.624069	Rbm43
ENSMUSG00000040852	21.3013	1.3871	0.644659	2.15168	0.0314229	0.624069	Plekhh2
ENSMUSG00000103049	2.81764	1.97961	0.920045	2.15164	0.0314256	0.624069	Gm37311
ENSMUSG00000029372	1.69116	-0.872152	0.406297	-2.14659	0.0318263	0.624479	Ppbp
ENSMUSG00000046897	18.7133	-1.59847	0.744647	-2.14661	0.0318243	0.624479	Zfp740
ENSMUSG00000051111	54.3535	-1.98567	0.92486	-2.147	0.0317934	0.624479	Sv2c
ENSMUSG00000078974	3.18292	-0.967059	0.450577	-2.14627	0.0318515	0.624479	Sec61g
ENSMUSG00000038256	7.24297	1.75334	0.817572	2.14457	0.0319872	0.6259	Bcl9
ENSMUSG00000000282	6.41217	1.47327	0.689233	2.13755	0.032553	0.626027	Mnt
ENSMUSG00000003199	48.521	1.25618	0.587663	2.13758	0.0325508	0.626027	Mpnd
ENSMUSG00000006021	10.1649	2.06918	0.965508	2.1431	0.0321048	0.626027	Kptn
ENSMUSG00000020101	83.8926	-0.908966	0.425741	-2.13502	0.0327592	0.626027	Vsir
ENSMUSG00000026670	517.738	-0.604965	0.282653	-2.14031	0.0323298	0.626027	Uap1
ENSMUSG00000027176	8.06205	1.49048	0.698801	2.13291	0.0329321	0.626027	Cstf3
ENSMUSG00000029836	2.00008	1.0701	0.500419	2.13841	0.0324833	0.626027	Cbx3
ENSMUSG00000035900	11.0136	-1.64735	0.770606	-2.13773	0.0325385	0.626027	Gramd4
ENSMUSG00000038582	35.4032	-1.188	0.557018	-2.13279	0.0329421	0.626027	Pptc7
ENSMUSG00000040928	11.9792	1.75075	0.820316	2.13423	0.0328238	0.626027	S100pbp
ENSMUSG00000041126	40.8315	0.867192	0.405866	2.13664	0.032627	0.626027	H2afv
ENSMUSG00000042997	7.59487	2.20073	1.02969	2.13728	0.0325752	0.626027	Nhlrc3
ENSMUSG00000066621	10.9686	1.81051	0.847949	2.13516	0.0327476	0.626027	Tecpr1
ENSMUSG00000082912	0.458553	1.37027	0.64198	2.13445	0.0328062	0.626027	Gm8770
ENSMUSG00000084338	0.64574	1.57131	0.734218	2.14012	0.0323452	0.626027	Gm13531
ENSMUSG00000020430	8.72827	-1.66344	0.780917	-2.13011	0.0331627	0.626611	Pes1
ENSMUSG00000024308	118.837	-0.741572	0.348074	-2.1305	0.0331302	0.626611	Tapbp
ENSMUSG00000037321	4.23664	-1.96837	0.923739	-2.13088	0.0330994	0.626611	Tap1
ENSMUSG00000028967	1686.15	-0.829978	0.390737	-2.12413	0.0336591	0.633571	Errfi1
ENSMUSG00000063142	78.6704	1.85925	0.874983	2.12489	0.0335956	0.633571	Kcnma1
ENSMUSG00000098761	4.11552	0.852809	0.401846	2.12223	0.0338184	0.635363	Gm18821
ENSMUSG00000000194	38.0756	1.05963	0.500073	2.11896	0.0340942	0.635465	Gpr107
ENSMUSG00000016520	2.55595	2.00897	0.948363	2.11836	0.0341447	0.635465	Lnx2
ENSMUSG00000023977	53.4594	0.842078	0.397106	2.12054	0.0339606	0.635465	Ubr2
ENSMUSG00000043496	11.7127	2.18776	1.03207	2.11978	0.0340247	0.635465	Tril
ENSMUSG00000056673	3.74855	-2.10335	0.992091	-2.12012	0.0339962	0.635465	Kdm5d
ENSMUSG00000038119	363.846	0.544841	0.257646	2.11468	0.0344568	0.64007	Cdon
ENSMUSG00000032649	56.3431	1.32353	0.626503	2.11256	0.0346382	0.642234	Colgalt2
ENSMUSG00000029363	10.7486	1.90113	0.901087	2.10982	0.0348742	0.644592	Rfc5
ENSMUSG00000060739	2.56125	1.01817	0.482644	2.10957	0.0348956	0.644592	Nsa2
ENSMUSG00000024807	36.1072	0.902665	0.428188	2.1081	0.035022	0.645397	Syvn1
ENSMUSG00000029422	56.8854	0.720136	0.341693	2.10755	0.0350696	0.645397	Rsrc2
ENSMUSG00000029674	11.4576	-1.83974	0.873858	-2.10531	0.0352641	0.647773	Limk1
ENSMUSG00000043822	50.9903	-1.21656	0.578746	-2.10206	0.0355484	0.651787	Adamtsl5
ENSMUSG00000003429	46.1163	0.276969	0.131872	2.10029	0.0357035	0.652215	Rps11
ENSMUSG00000031841	342.93	-0.807741	0.38454	-2.10054	0.0356816	0.652215	Cdh13
ENSMUSG00000034463	805.196	0.760708	0.362496	2.09852	0.0358588	0.653846	Scara3
ENSMUSG00000036371	76.8184	0.590021	0.281343	2.09715	0.0359799	0.654848	Serbp1
ENSMUSG00000019966	7.07962	1.58658	0.757874	2.09346	0.0363077	0.658392	Kitl
ENSMUSG00000042524	149.305	0.817545	0.390488	2.09365	0.0362912	0.658392	Sun2
ENSMUSG00000027569	13.9215	1.71817	0.821354	2.09187	0.0364502	0.658628	Mrgbp
ENSMUSG00000034621	33.4104	-1.08187	0.517371	-2.09109	0.0365202	0.658628	Gpatch8
ENSMUSG00000052726	12.7782	-1.68593	0.806092	-2.09149	0.0364845	0.658628	Kcnt2
ENSMUSG00000022750	20.0463	-1.6269	0.778959	-2.08856	0.0367474	0.661521	Klhl22
ENSMUSG00000004947	12.7957	-1.13531	0.545493	-2.08125	0.0374115	0.662774	Dtx2
ENSMUSG00000009281	70.3804	-1.01782	0.488927	-2.08174	0.0373665	0.662774	Rarres2
ENSMUSG00000024098	153.536	0.583819	0.280259	2.08314	0.0372387	0.662774	Twsg1
ENSMUSG00000026249	562.533	-0.82692	0.397488	-2.08036	0.0374923	0.662774	Serpine2
ENSMUSG00000027358	33.8286	1.1357	0.546472	2.07824	0.0376873	0.662774	Bmp2
ENSMUSG00000030741	20.8526	1.51885	0.73059	2.07894	0.037623	0.662774	Spns1
ENSMUSG00000031849	2749.2	1.13188	0.543306	2.08332	0.0372222	0.662774	Comp
ENSMUSG00000033760	24.9257	1.18549	0.568441	2.08552	0.0370224	0.662774	Rbm4b
ENSMUSG00000034135	43.9999	-0.958741	0.460935	-2.07999	0.0375265	0.662774	Sik3
ENSMUSG00000035048	6.09325	0.827835	0.398062	2.07967	0.0375562	0.662774	Anapc13
ENSMUSG00000061482	4.20466	1.28832	0.619546	2.07946	0.0375753	0.662774	Hist1h4d
ENSMUSG00000065954	49.9399	-0.771238	0.370097	-2.08388	0.0371709	0.662774	Tacc1
ENSMUSG00000098973	3743.72	0.345509	0.166097	2.08016	0.0375107	0.662774	Mir6236
ENSMUSG00000078862	1.30542	-1.61833	0.779334	-2.07655	0.0378432	0.664335	Gm14326
ENSMUSG00000022261	349.986	-0.671387	0.323681	-2.07423	0.0380583	0.665751	Sdc2
ENSMUSG00000036591	75.6006	-0.733246	0.353486	-2.07433	0.0380491	0.665751	Arhgap21
ENSMUSG00000018412	36.7018	0.888052	0.428466	2.07263	0.0382065	0.665779	Kansl1
ENSMUSG00000027342	23.7772	0.75929	0.366446	2.07204	0.0382616	0.665779	Pcna
ENSMUSG00000062867	10.9755	0.744683	0.359242	2.07293	0.0381789	0.665779	Impdh2
ENSMUSG00000058745	1.56607	1.11283	0.537597	2.07	0.0384523	0.667924	Gm9174
ENSMUSG00000021754	14.1779	1.45046	0.701558	2.06749	0.0386884	0.66913	Map3k1
ENSMUSG00000022507	64.6737	0.800266	0.387296	2.06629	0.0388009	0.66913	1810013L24Rik
ENSMUSG00000028600	60.6479	-1.35566	0.656281	-2.06567	0.0388597	0.66913	Podn
ENSMUSG00000043556	5.87131	-2.12199	1.02721	-2.06577	0.0388498	0.66913	Fbxl7
ENSMUSG00000056515	147.321	0.753289	0.364615	2.06599	0.0388297	0.66913	Rab31
ENSMUSG00000073411	835.503	-0.389679	0.18873	-2.06474	0.0389477	0.669481	H2-D1
ENSMUSG00000078440	27.9182	-1.36345	0.66108	-2.06245	0.0391647	0.672045	Dohh
ENSMUSG00000020272	3.46788	-2.04814	0.994209	-2.06007	0.0393919	0.673784	Stk10
ENSMUSG00000021109	93.9701	0.749547	0.363919	2.05965	0.0394317	0.673784	Hif1a
ENSMUSG00000079478	5.38906	2.04413	0.992659	2.05925	0.0394702	0.673784	Sssca1
ENSMUSG00000022635	20.972	0.83451	0.405651	2.05721	0.039666	0.675961	Zcrb1
ENSMUSG00000031485	27.3579	-1.18897	0.578243	-2.05618	0.039765	0.676484	Plpbp
ENSMUSG00000031585	13.8988	1.60328	0.780676	2.05371	0.0400042	0.679385	Gtf2e2
ENSMUSG00000048376	28.9148	-1.56124	0.761349	-2.05062	0.0403038	0.682133	F2r
ENSMUSG00000073775	5.74733	-2.04855	0.998786	-2.05104	0.040263	0.682133	Kti12
ENSMUSG00000019278	76.0474	-1.98303	0.96876	-2.04697	0.0406608	0.687	Dpep1
ENSMUSG00000054309	35.3915	1.20362	0.588263	2.04605	0.0407513	0.687357	Cpsf3
ENSMUSG00000030657	25.4971	1.27859	0.625384	2.04449	0.0409051	0.688778	Xylt1
ENSMUSG00000022890	49.1597	0.474813	0.232606	2.04127	0.0412236	0.689452	Atp5j
ENSMUSG00000022965	18.3026	-1.30737	0.640436	-2.04138	0.041213	0.689452	Ifngr2
ENSMUSG00000025736	13.5001	1.0928	0.534798	2.04338	0.0410149	0.689452	Jmjd8
ENSMUSG00000052962	16.3654	1.78868	0.87618	2.04145	0.0412065	0.689452	Mrpl35
ENSMUSG00000081389	1.29082	1.01447	0.49748	2.03921	0.0414287	0.691712	Gm13368
ENSMUSG00000026678	125.78	-2.31884	1.13818	-2.03732	0.0416181	0.693704	Rgs5
ENSMUSG00000050213	16.5053	2.48066	1.21921	2.03465	0.0418863	0.697003	Snip1
ENSMUSG00000105896	8.90278	1.751	0.860959	2.03378	0.0419736	0.697284	Gm43311
ENSMUSG00000030199	12.3443	1.28668	0.633254	2.03186	0.0421682	0.699342	Etv6
ENSMUSG00000022360	11.1382	-1.92179	0.947031	-2.02928	0.0424303	0.701373	Atad2
ENSMUSG00000041685	33.4422	0.721117	0.35536	2.02926	0.0424323	0.701373	Fcho2
ENSMUSG00000023046	1495.91	-0.909239	0.448221	-2.02855	0.042504	0.701387	Igfbp6
ENSMUSG00000027583	13.9149	-1.72662	0.851971	-2.02662	0.0427014	0.701796	Zbtb46
ENSMUSG00000028156	26.0861	-0.894495	0.441314	-2.02689	0.0426736	0.701796	Eif4e
ENSMUSG00000032352	12.5543	1.70617	0.842041	2.02623	0.0427414	0.701796	Lrrc1
ENSMUSG00000064373	377.622	-0.632612	0.312698	-2.02308	0.0430653	0.705944	Selenop
ENSMUSG00000030509	4.33188	1.99107	0.984832	2.02173	0.0432042	0.707049	Asb7
ENSMUSG00000020472	20.5127	1.61398	0.798825	2.02044	0.0433373	0.708058	Zkscan17
ENSMUSG00000025747	4.21066	-1.84644	0.917401	-2.01269	0.0441473	0.720102	Tyms
ENSMUSG00000031278	23.0611	-1.29829	0.645499	-2.0113	0.0442937	0.720651	Acsl4
ENSMUSG00000033671	46.1611	1.00909	0.501787	2.01099	0.0443265	0.720651	Cep350
ENSMUSG00000016487	71.8404	0.783801	0.392359	1.99766	0.0457534	0.723795	Ppfibp1
ENSMUSG00000020044	182.473	1.02536	0.513102	1.99836	0.0456779	0.723795	Timp3
ENSMUSG00000020424	10.0951	1.99047	0.991792	2.00694	0.0447557	0.723795	Gatsl3
ENSMUSG00000022895	34.4597	-1.04856	0.522483	-2.00688	0.0447621	0.723795	Ets2
ENSMUSG00000026289	11.5798	1.65123	0.825497	2.00028	0.0454699	0.723795	Atg16l1
ENSMUSG00000027333	9.47171	1.86203	0.930044	2.00209	0.0452752	0.723795	Smox
ENSMUSG00000027397	172.138	0.853137	0.427213	1.99698	0.0458272	0.723795	Slc20a1
ENSMUSG00000029247	56.0446	0.822033	0.411785	1.99627	0.0459049	0.723795	Paics
ENSMUSG00000030465	75.3287	0.805498	0.401655	2.00545	0.0449154	0.723795	Psd3
ENSMUSG00000030790	9.84323	2.34519	1.17044	2.00368	0.0451041	0.723795	Adm
ENSMUSG00000031770	209.034	0.631568	0.315643	2.00089	0.0454042	0.723795	Herpud1
ENSMUSG00000037936	11.5049	1.80205	0.89842	2.0058	0.0448775	0.723795	Scarb1
ENSMUSG00000039270	10.4545	1.79622	0.898127	1.99996	0.0455049	0.723795	Megf9
ENSMUSG00000046345	0.790714	0.760137	0.380786	1.99623	0.0459088	0.723795	Smco1
ENSMUSG00000052684	680.333	0.682371	0.341017	2.00099	0.0453934	0.723795	Jun
ENSMUSG00000059005	7.68096	0.787588	0.392188	2.00819	0.0446234	0.723795	Hnrnpa3
ENSMUSG00000074212	22.813	1.24434	0.622751	1.99813	0.0457025	0.723795	Dnajb14
ENSMUSG00000079355	4.44976	2.09842	1.04718	2.00386	0.0450846	0.723795	Ackr4
ENSMUSG00000097300	27.2995	1.21855	0.610328	1.99655	0.0458745	0.723795	Gm26835
ENSMUSG00000062093	1.07954	1.25003	0.626582	1.995	0.0460425	0.724748	Gm10110
ENSMUSG00000020817	23.9225	-1.04182	0.522538	-1.99377	0.0461773	0.725717	Rabep1
ENSMUSG00000042677	17.2262	-1.15984	0.582463	-1.99127	0.0464507	0.727703	Zc3h12a
ENSMUSG00000053560	255.997	0.718237	0.360634	1.9916	0.0464154	0.727703	Ier2
ENSMUSG00000065037	45.0435	0.357626	0.17976	1.98946	0.0466508	0.729683	Rn7sk
ENSMUSG00000002625	35.9315	0.990435	0.498206	1.988	0.0468113	0.731039	Akap8l
ENSMUSG00000005893	29.4642	1.19128	0.599607	1.98677	0.0469479	0.732018	Nr2c2
ENSMUSG00000003452	4.13432	-1.9337	0.979257	-1.97467	0.0483061	0.73527	Bicd1
ENSMUSG00000018379	44.3285	0.778062	0.392544	1.9821	0.0474677	0.73527	Srsf1
ENSMUSG00000020691	9.64526	1.98049	0.999809	1.98087	0.0476057	0.73527	Mettl2
ENSMUSG00000024646	125.125	-0.552922	0.279955	-1.97504	0.048264	0.73527	Cyb5a
ENSMUSG00000025810	68.6374	-1.22603	0.620917	-1.97455	0.0483191	0.73527	Nrp1
ENSMUSG00000026991	9.97388	1.51801	0.767775	1.97715	0.0480242	0.73527	Pkp4
ENSMUSG00000027011	37.6467	1.09264	0.553424	1.97433	0.0483447	0.73527	Ube2e3
ENSMUSG00000027671	9.84948	1.83668	0.930197	1.97451	0.0483241	0.73527	Actl6a
ENSMUSG00000028033	16.5615	1.85684	0.939917	1.97554	0.0482071	0.73527	Kcnq5
ENSMUSG00000028423	31.2919	-1.12374	0.568611	-1.9763	0.0481212	0.73527	Nfx1
ENSMUSG00000030213	75.8531	0.914527	0.462608	1.9769	0.0480534	0.73527	Atf7ip
ENSMUSG00000030815	5.79369	1.86863	0.942299	1.98305	0.0473616	0.73527	Phkg2
ENSMUSG00000031930	69.6253	1.03836	0.524244	1.98068	0.0476271	0.73527	Wwp2
ENSMUSG00000041187	12.8193	1.95243	0.986416	1.97931	0.0477806	0.73527	Prkd2
ENSMUSG00000044066	9.66305	1.54719	0.781393	1.98005	0.0476983	0.73527	Cep68
ENSMUSG00000063727	68.846	1.97119	0.996371	1.97837	0.0478872	0.73527	Tnfrsf11b
ENSMUSG00000028525	117.959	0.984442	0.498802	1.97361	0.0484258	0.735374	Pde4b
ENSMUSG00000021635	7.65839	2.12183	1.07625	1.9715	0.0486672	0.736779	Rad17
ENSMUSG00000058301	45.0114	1.01479	0.514565	1.97214	0.0485939	0.736779	Upf1
ENSMUSG00000048583	1.44066	2.1665	1.09972	1.97005	0.0488325	0.738153	Igf2
ENSMUSG00000000751	39.3101	1.34536	0.683138	1.96938	0.0489094	0.73819	Rpa1
ENSMUSG00000084098	3.39578	-0.803435	0.408618	-1.96623	0.0492726	0.742539	Gm13422
ENSMUSG00000026110	57.1593	1.81561	0.924371	1.96416	0.0495118	0.743879	Mgat4a
ENSMUSG00000027678	94.421	0.687608	0.350065	1.96423	0.0495032	0.743879	Ncoa3
ENSMUSG00000063506	2.64328	-1.73657	0.884429	-1.96349	0.0495891	0.743912	Arhgap22
ENSMUSG00000073676	8.14626	-0.813865	0.414648	-1.96279	0.049671	0.744012	Hspe1
ENSMUSG00000028633	8.30608	-1.91578	0.977542	-1.95979	0.0500201	0.74811	Ctps
ENSMUSG00000022668	6.55174	1.9641	1.00286	1.9585	0.0501715	0.748115	Gtpbp8
ENSMUSG00000023951	51.679	-1.04678	0.534345	-1.95899	0.0501139	0.748115	Vegfa
ENSMUSG00000034793	9.42554	-1.56002	0.796941	-1.95752	0.0502869	0.748708	G6pc3
ENSMUSG00000026193	13193.9	-0.647684	0.331104	-1.95613	0.0504494	0.74971	Fn1
ENSMUSG00000037935	8.1059	0.878169	0.449055	1.95559	0.0505132	0.74971	Smarce1
ENSMUSG00000040254	102.281	1.59312	0.814888	1.95501	0.0505814	0.74971	Sema3d
ENSMUSG00000001802	7.60589	-1.64843	0.844611	-1.9517	0.0509739	0.752215	Lrp3
ENSMUSG00000002205	13.9369	-1.99004	1.02027	-1.9505	0.0511168	0.752215	Vrk3
ENSMUSG00000021994	30.3178	2.29265	1.17549	1.95038	0.0511303	0.752215	Wnt5a
ENSMUSG00000026113	28.6595	1.04174	0.533601	1.95228	0.0509045	0.752215	Inpp4a
ENSMUSG00000028413	106.392	-0.739887	0.379245	-1.95095	0.0510634	0.752215	B4galt1
ENSMUSG00000102145	1.80272	1.71444	0.879328	1.94972	0.0512093	0.752259	Gm38056
ENSMUSG00000025324	26.9577	1.18244	0.606888	1.94837	0.0513706	0.752398	Atp10a
ENSMUSG00000035547	17.8884	1.24495	0.638941	1.94846	0.0513596	0.752398	Capn5
ENSMUSG00000057738	249.777	0.430242	0.220925	1.94745	0.0514803	0.75289	Sptan1
ENSMUSG00000001768	111.22	0.792928	0.408212	1.94244	0.0520836	0.753725	Rin2
ENSMUSG00000013419	15.6694	1.24928	0.642947	1.94306	0.052009	0.753725	Zfp651
ENSMUSG00000025134	46.1738	0.781954	0.402462	1.94293	0.052025	0.753725	Alyref
ENSMUSG00000027593	46.35	0.650528	0.334514	1.9447	0.0518116	0.753725	Raly
ENSMUSG00000036990	32.0288	1.07552	0.55306	1.94467	0.0518145	0.753725	Otud4
ENSMUSG00000038456	13.6929	-1.26659	0.651914	-1.94288	0.0520301	0.753725	Dennd2a
ENSMUSG00000039158	9.14806	-1.66867	0.858405	-1.94392	0.051905	0.753725	Akna
ENSMUSG00000067851	39.4138	0.918292	0.472878	1.94192	0.0521464	0.753725	Arfgef1
ENSMUSG00000026519	116.594	0.838952	0.432433	1.94007	0.0523709	0.755867	Tmem63a
ENSMUSG00000046580	1.374	0.778461	0.401459	1.93908	0.0524915	0.756505	Gm7862
ENSMUSG00000003153	6.76794	-1.79342	0.926311	-1.93609	0.0528567	0.758163	Slc2a3
ENSMUSG00000006519	64.2201	-0.550555	0.284395	-1.93588	0.0528821	0.758163	Cyba
ENSMUSG00000021650	10.3116	1.97534	1.02041	1.93584	0.0528872	0.758163	Ptcd2
ENSMUSG00000027630	63.5695	0.773851	0.399792	1.93563	0.0529129	0.758163	Tbl1xr1
ENSMUSG00000020027	13.576	-1.59894	0.826446	-1.93472	0.0530243	0.758661	Socs2
ENSMUSG00000025268	127.349	1.02312	0.530282	1.92939	0.0536824	0.76517	Maged2
ENSMUSG00000028862	22.6434	-1.19746	0.620716	-1.92916	0.053711	0.76517	Map3k6
ENSMUSG00000031732	19.4651	1.4067	0.728876	1.92995	0.0536125	0.76517	Phlpp2
ENSMUSG00000023110	16.8426	1.52821	0.793486	1.92595	0.0541108	0.766809	Prmt5
ENSMUSG00000027236	4.99293	-0.811487	0.420982	-1.9276	0.0539044	0.766809	Eif3j1
ENSMUSG00000033707	6.67393	-1.78592	0.927307	-1.92592	0.0541145	0.766809	Lrrc24
ENSMUSG00000071172	85.3678	0.552095	0.286691	1.92575	0.0541359	0.766809	Srsf3
ENSMUSG00000092341	4317.82	0.280505	0.145762	1.9244	0.0543045	0.768098	Malat1
ENSMUSG00000020964	83.4516	-0.752708	0.391533	-1.92246	0.0545476	0.770028	Sel1l
ENSMUSG00000028790	31.6303	0.868399	0.452234	1.92024	0.0548274	0.770028	Khdrbs1
ENSMUSG00000030421	9.78399	-1.41941	0.739662	-1.91899	0.0549853	0.770028	Uri1
ENSMUSG00000030759	45.484	-0.801287	0.417417	-1.91963	0.0549046	0.770028	Far1
ENSMUSG00000033253	8.95342	1.64483	0.856064	1.92139	0.0546831	0.770028	Szt2
ENSMUSG00000073664	103.249	0.680419	0.354412	1.91985	0.0548768	0.770028	Nbeal1
ENSMUSG00000101609	73.7491	1.23324	0.642516	1.9194	0.054934	0.770028	Kcnq1ot1
ENSMUSG00000022100	25.6223	1.01647	0.531239	1.91339	0.0556977	0.771277	Xpo7
ENSMUSG00000024759	89.839	0.625987	0.327044	1.91408	0.0556103	0.771277	Atl3
ENSMUSG00000024949	86.3003	0.554782	0.289879	1.91384	0.0556409	0.771277	Sf1
ENSMUSG00000027610	22.2923	1.72553	0.901804	1.91342	0.0556942	0.771277	Gss
ENSMUSG00000028399	53.0258	-1.41393	0.738059	-1.91574	0.0553982	0.771277	Ptprd
ENSMUSG00000037206	423.309	-0.671905	0.351106	-1.91368	0.0556608	0.771277	Islr
ENSMUSG00000066900	17.0897	0.93647	0.489078	1.91477	0.0555224	0.771277	Suds3
ENSMUSG00000103869	5.81211	2.07843	1.08426	1.91692	0.0552487	0.771277	Gm37420
ENSMUSG00000020092	8.22531	1.86952	0.977965	1.91165	0.0559216	0.773121	Pald1
ENSMUSG00000034390	36.2581	0.936397	0.489969	1.91114	0.055987	0.773121	Cmip
ENSMUSG00000031627	14.762	-1.26246	0.660812	-1.91047	0.0560727	0.773225	Irf2
ENSMUSG00000027245	3.64498	1.01949	0.534079	1.90888	0.0562776	0.77378	Hypk
ENSMUSG00000041241	10.098	-1.66799	0.874051	-1.90834	0.0563474	0.77378	Mul1
ENSMUSG00000081344	6.05861	-0.393848	0.206347	-1.90867	0.0563045	0.77378	Gm14303
ENSMUSG00000028676	31.2579	0.660575	0.346954	1.90393	0.0569199	0.775249	Srsf10
ENSMUSG00000028700	24.222	1.3811	0.725407	1.90389	0.0569242	0.775249	Pomgnt1
ENSMUSG00000037287	13.4293	1.57837	0.828904	1.90417	0.0568887	0.775249	Tbcel
ENSMUSG00000043421	12.044	-2.02861	1.06426	-1.90612	0.0566345	0.775249	Hilpda
ENSMUSG00000045107	8.33715	-1.68432	0.883473	-1.90648	0.0565881	0.775249	Saysd1
ENSMUSG00000059658	0.535731	1.10291	0.578964	1.90498	0.0567832	0.775249	Gm16379
ENSMUSG00000013833	37.2165	-1.22938	0.646142	-1.90265	0.0570858	0.776382	Med16
ENSMUSG00000098404	6.89667	-0.742842	0.390849	-1.90058	0.0573564	0.778993	Mrip-ps
ENSMUSG00000020422	42.6593	1.02016	0.537191	1.89906	0.0575571	0.780648	Tns3
ENSMUSG00000096992	4.05589	1.74318	0.918554	1.89774	0.0577298	0.781919	Gm26788
ENSMUSG00000020262	47.0144	1.0759	0.569093	1.89056	0.0586835	0.784179	Adarb1
ENSMUSG00000020346	42.3822	-0.785896	0.416221	-1.88817	0.059003	0.784179	Mgat1
ENSMUSG00000022094	29.3762	-1.3134	0.693694	-1.89335	0.0583116	0.784179	Slc39a14
ENSMUSG00000022557	25.8432	1.31911	0.69697	1.89263	0.0584071	0.784179	Bop1
ENSMUSG00000026238	21.0296	0.381462	0.201303	1.89497	0.058097	0.784179	Ptma
ENSMUSG00000026361	21.3611	-1.0036	0.531226	-1.88921	0.0588634	0.784179	Cdc73
ENSMUSG00000027651	20.9867	1.19931	0.633943	1.89183	0.0585133	0.784179	Rprd1b
ENSMUSG00000034154	20.8854	0.966389	0.510118	1.89444	0.0581665	0.784179	Ino80
ENSMUSG00000042254	2572.77	1.25825	0.666598	1.88756	0.0590847	0.784179	Cilp
ENSMUSG00000045636	23.8219	1.2282	0.649566	1.89081	0.0586501	0.784179	Mtus1
ENSMUSG00000046546	7.84595	1.19058	0.629481	1.89136	0.0585759	0.784179	Fam43a
ENSMUSG00000066640	18.9654	1.61473	0.854634	1.88938	0.058841	0.784179	Fbxl18
ENSMUSG00000083169	1.82791	-1.20758	0.639603	-1.88802	0.0590231	0.784179	Gm6580
ENSMUSG00000084230	1.5305	0.955838	0.505918	1.88931	0.0588497	0.784179	Gm14388
ENSMUSG00000105452	8.9683	0.443249	0.234778	1.88795	0.059033	0.784179	Gm5276
ENSMUSG00000021870	35.4618	0.821108	0.435461	1.88561	0.0593478	0.784211	Slmap
ENSMUSG00000034120	110.61	0.395757	0.209803	1.88633	0.0592501	0.784211	Srsf2
ENSMUSG00000036225	3.30219	-1.7419	0.923773	-1.88564	0.0593435	0.784211	Kctd1
ENSMUSG00000050222	17.7822	1.29795	0.6885	1.88519	0.0594039	0.784211	Il17d
ENSMUSG00000038351	13.5161	-1.22982	0.652582	-1.88454	0.0594914	0.78432	Sgsm2
ENSMUSG00000017561	11.5125	1.53464	0.8178	1.87655	0.0605794	0.788169	Crlf3
ENSMUSG00000020038	6.86722	1.55247	0.826255	1.87892	0.0602549	0.788169	Cry1
ENSMUSG00000021051	13.444	-1.09765	0.584908	-1.87662	0.0605703	0.788169	Ppp2r5e
ENSMUSG00000031320	21.1648	0.344509	0.183316	1.87932	0.0602013	0.788169	Rps4x
ENSMUSG00000038633	136.26	0.488459	0.259756	1.88045	0.0600463	0.788169	Degs1
ENSMUSG00000044098	14.2185	-1.35451	0.721584	-1.87714	0.0604993	0.788169	Rsbn1
ENSMUSG00000059355	7.49287	0.770645	0.410439	1.87761	0.0604343	0.788169	Wdr83os
ENSMUSG00000059555	11.4996	2.1678	1.15246	1.88102	0.0599691	0.788169	Tor4a
ENSMUSG00000073471	1.42219	1.43914	0.766879	1.87661	0.060571	0.788169	Rsph3a
ENSMUSG00000074182	15.0044	1.74181	0.926796	1.87939	0.0601908	0.788169	Znhit6
ENSMUSG00000037720	52.7704	0.875516	0.466898	1.87518	0.0607683	0.789589	Tmem33
ENSMUSG00000103037	8.21143	-2.06622	1.10277	-1.87366	0.0609776	0.79127	Pcdhgb1
ENSMUSG00000061838	7.52389	1.37375	0.734187	1.87112	0.061328	0.793736	Suclg2
ENSMUSG00000082243	0.698332	-1.02722	0.548917	-1.87136	0.0612957	0.793736	Gm3810
ENSMUSG00000032249	8.12563	1.06212	0.567992	1.86996	0.0614896	0.793752	Anp32a
ENSMUSG00000053332	94.5737	0.55042	0.294341	1.87001	0.0614825	0.793752	Gas5
ENSMUSG00000104623	6.72476	0.388744	0.208145	1.86766	0.0618096	0.796845	Gm6394
ENSMUSG00000006134	18.5528	-1.20225	0.645868	-1.86145	0.062681	0.798238	Crkl
ENSMUSG00000020142	51.4681	1.11578	0.598026	1.86578	0.0620728	0.798238	Slc1a4
ENSMUSG00000021136	33.13	1.90374	1.02376	1.85955	0.0629487	0.798238	Smoc1
ENSMUSG00000025351	196.803	-0.332932	0.178844	-1.86158	0.0626626	0.798238	Cd63
ENSMUSG00000025647	167.743	-0.454941	0.243872	-1.86549	0.0621131	0.798238	Shisa5
ENSMUSG00000027506	7.07614	-1.60715	0.863564	-1.86107	0.0627346	0.798238	Tpd52
ENSMUSG00000028693	54.538	0.83955	0.451216	1.86064	0.0627952	0.798238	Nasp
ENSMUSG00000043631	141.153	0.923928	0.495665	1.86402	0.0623195	0.798238	Ecm2
ENSMUSG00000047676	4.45942	0.445947	0.239861	1.85919	0.0630004	0.798238	Rpsa-ps10
ENSMUSG00000049775	300.893	-0.498004	0.267907	-1.85886	0.0630464	0.798238	Tmsb4x
ENSMUSG00000056608	58.5865	0.667838	0.35901	1.86022	0.0628543	0.798238	Chd9
ENSMUSG00000061232	172.236	-0.53728	0.288492	-1.86237	0.0625506	0.798238	H2-K1
ENSMUSG00000078853	1.84997	-1.56262	0.838726	-1.86308	0.0624508	0.798238	Igtp
ENSMUSG00000095288	0.46716	-0.844292	0.452724	-1.86492	0.062193	0.798238	Gm7618
ENSMUSG00000028104	6.4693	-1.38875	0.747816	-1.85708	0.0633004	0.80043	Polr3gl
ENSMUSG00000028906	8.76375	0.939818	0.506997	1.8537	0.0637827	0.801075	Epb41
ENSMUSG00000037370	176.215	1.10728	0.597263	1.85393	0.0637489	0.801075	Enpp1
ENSMUSG00000039828	9.51429	-1.5083	0.812691	-1.85593	0.0634628	0.801075	Wdr70
ENSMUSG00000048039	6.56806	-1.64123	0.885485	-1.85348	0.0638142	0.801075	Isg20l2
ENSMUSG00000048186	0.357247	1.12884	0.608754	1.85435	0.0636891	0.801075	Bend7
ENSMUSG00000068329	14.9469	1.38408	0.746813	1.85332	0.0638368	0.801075	Htra2
ENSMUSG00000071302	4.93891	-1.75376	0.946685	-1.85252	0.0639508	0.801178	2610044O15Rik8
ENSMUSG00000105528	17.7304	1.69008	0.912507	1.85213	0.0640069	0.801178	Gm43519
ENSMUSG00000020612	130.728	-0.557512	0.301766	-1.84749	0.0646757	0.802118	Prkar1a
ENSMUSG00000027858	38.423	1.46017	0.79017	1.84792	0.064614	0.802118	Tspan2
ENSMUSG00000028049	29.1226	0.996856	0.539682	1.84712	0.06473	0.802118	Scamp3
ENSMUSG00000028541	19.9774	-1.27	0.686664	-1.84952	0.0643821	0.802118	B4galt2
ENSMUSG00000029228	28.3947	-1.41305	0.764049	-1.84942	0.0643974	0.802118	Lnx1
ENSMUSG00000030557	107.079	0.647422	0.350228	1.84858	0.064519	0.802118	Mef2a
ENSMUSG00000030816	14.3135	1.27166	0.687047	1.85091	0.0641831	0.802118	Rnf40
ENSMUSG00000047098	14.2425	1.40585	0.76074	1.84801	0.0646012	0.802118	Rnf31
ENSMUSG00000083087	0.579034	-0.773845	0.419251	-1.84578	0.0649244	0.803521	Gm11249
ENSMUSG00000001630	23.9212	1.06448	0.581416	1.83083	0.0671253	0.804609	Stk38l
ENSMUSG00000004069	21.8309	1.25701	0.684429	1.83658	0.0662721	0.804609	Dnaja3
ENSMUSG00000017386	12.9677	-1.83896	1.00248	-1.8344	0.0665941	0.804609	Traf4
ENSMUSG00000017677	102.879	0.682093	0.369967	1.84366	0.0652329	0.804609	Wsb1
ENSMUSG00000022702	1.52593	-1.44881	0.790988	-1.83165	0.0670041	0.804609	Hira
ENSMUSG00000024097	88.716	0.58559	0.318645	1.83775	0.0660991	0.804609	Srsf7
ENSMUSG00000024247	8.66112	1.15076	0.624658	1.84222	0.0654425	0.804609	Pkdcc
ENSMUSG00000025358	9.66642	1.61652	0.882389	1.83198	0.0669543	0.804609	Cdk2
ENSMUSG00000026600	36.8481	1.15321	0.628068	1.83613	0.0663382	0.804609	Soat1
ENSMUSG00000028402	66.3162	-0.737452	0.399996	-1.84365	0.0652347	0.804609	Mpdz
ENSMUSG00000029333	5.85537	1.79391	0.976405	1.83726	0.0661716	0.804609	Rasgef1b
ENSMUSG00000033653	10.4038	1.62111	0.883924	1.83399	0.0666548	0.804609	Vps8
ENSMUSG00000038156	36.8537	-1.62306	0.881236	-1.84179	0.0655052	0.804609	Spon1
ENSMUSG00000039747	3.72935	-1.64232	0.894815	-1.83538	0.0664496	0.804609	Orai2
ENSMUSG00000041354	16.4553	1.30634	0.712487	1.83349	0.0667292	0.804609	Rgl2
ENSMUSG00000042138	9.77531	-1.67866	0.914477	-1.83565	0.0664088	0.804609	Msantd2
ENSMUSG00000042842	0.500267	1.34989	0.735998	1.83409	0.0666401	0.804609	Serpinb6b
ENSMUSG00000048100	6.57629	1.40527	0.766179	1.83413	0.0666354	0.804609	Taf13
ENSMUSG00000049659	15.5185	-1.29694	0.704824	-1.84009	0.065755	0.804609	Aftph
ENSMUSG00000055538	84.9997	-0.684768	0.373938	-1.83123	0.067066	0.804609	Zcchc24
ENSMUSG00000060260	10.4646	-1.62516	0.886904	-1.8324	0.0668922	0.804609	Pwwp2b
ENSMUSG00000061315	17.0897	0.417908	0.226707	1.84338	0.0652728	0.804609	Naca
ENSMUSG00000063254	9.01279	1.43128	0.781243	1.83205	0.0669434	0.804609	B230325K18
ENSMUSG00000082810	0.398337	-0.841588	0.458134	-1.83699	0.0662111	0.804609	Gm8682
ENSMUSG00000086228	0.874289	1.11663	0.606368	1.84151	0.0655473	0.804609	Ubap1l
ENSMUSG00000086596	35.3103	2.12879	1.15985	1.83541	0.0664451	0.804609	Susd5
ENSMUSG00000025147	33.9875	1.10424	0.603754	1.82895	0.0674071	0.805423	Mob2
ENSMUSG00000028799	9.11427	1.72194	0.942153	1.82766	0.0675999	0.805423	Zfp362
ENSMUSG00000031004	1.34146	1.73684	0.949436	1.82934	0.0673485	0.805423	Mki67
ENSMUSG00000038195	8.92765	1.94477	1.06346	1.82872	0.0674413	0.805423	Rilp
ENSMUSG00000084342	1.61925	-0.850126	0.46505	-1.82803	0.067545	0.805423	Gm11224
ENSMUSG00000021268	83.1488	1.36413	0.747308	1.82539	0.0679421	0.806588	Meg3
ENSMUSG00000034055	16.3018	1.2405	0.679537	1.8255	0.067925	0.806588	Phka1
ENSMUSG00000050199	24.2858	1.02075	0.559109	1.82567	0.0678993	0.806588	Lgr4
ENSMUSG00000021036	26.4496	-1.41778	0.777637	-1.82319	0.0682743	0.80691	Sptlc2
ENSMUSG00000025138	23.6506	1.40628	0.771384	1.82305	0.0682951	0.80691	Sirt7
ENSMUSG00000038482	5.65975	1.37757	0.755064	1.82443	0.0680864	0.80691	Tfdp1
ENSMUSG00000064080	398.993	-1.01704	0.557723	-1.82355	0.0682202	0.80691	Fbln2
ENSMUSG00000020176	76.8694	0.776614	0.426738	1.81989	0.0687764	0.807287	Grb10
ENSMUSG00000020719	427.415	0.273113	0.150001	1.82075	0.0686452	0.807287	Ddx5
ENSMUSG00000021270	51.7747	0.450899	0.24769	1.82042	0.0686953	0.807287	Hsp90aa1
ENSMUSG00000021549	28.06	0.930689	0.511533	1.81941	0.068849	0.807287	Rasa1
ENSMUSG00000026837	302.378	0.57401	0.315463	1.81958	0.0688233	0.807287	Col5a1
ENSMUSG00000030431	6.64901	1.33673	0.734833	1.81909	0.0688979	0.807287	Tmem238
ENSMUSG00000089791	4.0721	1.17722	0.646932	1.81969	0.0688064	0.807287	Gm3555
ENSMUSG00000002365	77.4157	-0.604174	0.332445	-1.81736	0.0691615	0.809419	Snx9
ENSMUSG00000020074	43.0982	0.838201	0.46151	1.81622	0.0693374	0.810519	Ccar1
ENSMUSG00000037643	11.5406	-0.878385	0.483932	-1.8151	0.0695084	0.811098	Prkci
ENSMUSG00000084957	10.0883	1.49426	0.823365	1.81483	0.0695508	0.811098	Bbip1
ENSMUSG00000007603	7.86386	1.61154	0.889126	1.8125	0.0699089	0.812994	Dus3l
ENSMUSG00000019978	120.745	-0.524496	0.289271	-1.81317	0.0698063	0.812994	Epb41l2
ENSMUSG00000103220	20.7812	1.37126	0.756693	1.81217	0.0699597	0.812994	Gm37728
ENSMUSG00000024975	33.7809	0.777616	0.429393	1.81096	0.0701464	0.813255	Pdcd4
ENSMUSG00000028975	11.8242	1.18937	0.656743	1.81101	0.0701401	0.813255	Pex14
ENSMUSG00000021468	28.2173	1.12721	0.622802	1.8099	0.0703109	0.813257	Sptlc1
ENSMUSG00000031889	12.4658	1.42603	0.787696	1.81039	0.0702359	0.813257	D230025D16Rik
ENSMUSG00000020677	12.0842	1.52621	0.844835	1.80652	0.0708376	0.816038	Ddx52
ENSMUSG00000021131	2.70546	0.789656	0.437247	1.80597	0.0709224	0.816038	Erh
ENSMUSG00000024472	8.13232	1.71303	0.948368	1.8063	0.070872	0.816038	Dcp2
ENSMUSG00000030105	61.5159	-0.682418	0.377922	-1.80571	0.0709634	0.816038	Arl8b
ENSMUSG00000081739	2.17249	1.14427	0.633587	1.80601	0.070916	0.816038	Mdm4-ps
ENSMUSG00000018076	77.7813	0.572742	0.317937	1.80143	0.0716352	0.819888	Med13l
ENSMUSG00000027601	15.3832	-1.2186	0.676683	-1.80084	0.0717285	0.819888	Mtfr1
ENSMUSG00000039680	15.9863	1.1809	0.655453	1.80166	0.0715985	0.819888	Mrps6
ENSMUSG00000040549	19.3532	1.36681	0.75824	1.8026	0.0714506	0.819888	Ckap5
ENSMUSG00000058672	93.4076	0.67408	0.374278	1.80102	0.0717005	0.819888	Tubb2a
ENSMUSG00000085303	0.7116	1.44474	0.802449	1.80042	0.0717951	0.819888	Gm16751
ENSMUSG00000000787	108.135	0.535166	0.298022	1.79573	0.072538	0.824568	Ddx3x
ENSMUSG00000026489	23.091	1.57876	0.879109	1.79586	0.0725167	0.824568	Coq8a
ENSMUSG00000030706	17.3623	0.916844	0.510463	1.7961	0.0724783	0.824568	Mrpl48
ENSMUSG00000036617	5.04996	1.73289	0.964294	1.79705	0.0723274	0.824568	Etl4
ENSMUSG00000046032	19.192	-1.06289	0.592111	-1.79509	0.0726388	0.824767	Snx12
ENSMUSG00000016024	425.763	-0.804295	0.448302	-1.79409	0.0727987	0.824934	Lbp
ENSMUSG00000019795	50.9537	0.659368	0.367807	1.7927	0.0730207	0.824934	Pcmt1
ENSMUSG00000035437	41.5937	-0.879898	0.490916	-1.79236	0.0730753	0.824934	Rabgap1
ENSMUSG00000081086	0.59966	-0.985771	0.549781	-1.79302	0.0729691	0.824934	Gm9506
ENSMUSG00000082878	0.56504	0.910408	0.508077	1.79187	0.0731535	0.824934	Gm12583
ENSMUSG00000085148	39.4922	-0.955409	0.532786	-1.79323	0.0729358	0.824934	Mir22hg
ENSMUSG00000005580	9.85458	-1.36123	0.760837	-1.78912	0.073596	0.827467	Adcy9
ENSMUSG00000027223	11.0251	1.39462	0.779511	1.78909	0.0735996	0.827467	Mapk8ip1
ENSMUSG00000053333	17.8256	1.25193	0.699824	1.78891	0.0736288	0.827467	Dis3l2
ENSMUSG00000002871	20.1378	1.38267	0.773217	1.7882	0.073743	0.827811	Tpra1
ENSMUSG00000028436	41.5552	-0.903778	0.505757	-1.78698	0.0739406	0.828168	Dcaf12
ENSMUSG00000106574	0.356879	1.09237	0.611294	1.78697	0.0739421	0.828168	Gm2451
ENSMUSG00000032243	184.265	0.877015	0.491101	1.78581	0.0741293	0.828283	Itga11
ENSMUSG00000055116	6.03665	1.77503	0.993977	1.78579	0.0741335	0.828283	Arntl
ENSMUSG00000091277	2.1665	1.44425	0.80894	1.78536	0.0742034	0.828283	Gm1818
ENSMUSG00000002949	9.91638	1.31287	0.736111	1.78352	0.0745012	0.829974	Timm44
ENSMUSG00000011257	3.82789	1.01576	0.570083	1.78178	0.0747849	0.829974	Pabpc4
ENSMUSG00000029587	5.11815	1.75454	0.984554	1.78207	0.074738	0.829974	Zfp12
ENSMUSG00000033287	14.0469	-1.00778	0.566234	-1.7798	0.0751092	0.829974	Kctd17
ENSMUSG00000037526	9.13524	1.91355	1.07441	1.78103	0.0749081	0.829974	Atg14
ENSMUSG00000042380	9.30617	1.67135	0.937768	1.78227	0.0747057	0.829974	Smim12
ENSMUSG00000062563	16.9669	1.14244	0.641774	1.78012	0.0750559	0.829974	Cys1
ENSMUSG00000068663	12.8843	-1.15048	0.646377	-1.77989	0.0750944	0.829974	Clec16a
ENSMUSG00000068758	6.15013	-1.6206	0.910523	-1.77985	0.0751002	0.829974	Il3ra
ENSMUSG00000025236	19.6568	-1.29746	0.730388	-1.7764	0.0756664	0.834268	Adpgk
ENSMUSG00000027582	11.9175	-1.52648	0.859225	-1.77658	0.075637	0.834268	Zgpat
ENSMUSG00000022463	41.2843	0.873573	0.492382	1.77418	0.0760341	0.83646	Srebf2
ENSMUSG00000037434	8.62056	1.41767	0.7989	1.77453	0.0759761	0.83646	Slc30a1
ENSMUSG00000029782	7.746	-1.13365	0.63931	-1.77324	0.0761885	0.837069	Tmem209
ENSMUSG00000064210	135.471	-0.4897	0.276226	-1.77282	0.0762586	0.837069	Ano6
ENSMUSG00000004936	43.0971	0.934497	0.52755	1.77139	0.0764956	0.838741	Map2k1
ENSMUSG00000002845	38.6239	0.76144	0.431389	1.76509	0.0775486	0.840021	Tmem39a
ENSMUSG00000005846	40.441	-0.96235	0.545358	-1.76462	0.0776276	0.840021	Rsl1d1
ENSMUSG00000007050	4.10137	1.48916	0.844287	1.76381	0.0777641	0.840021	Lsm2
ENSMUSG00000014551	9.66323	-1.36474	0.77281	-1.76595	0.0774048	0.840021	Mrps25
ENSMUSG00000021061	1.11981	1.58435	0.898095	1.76412	0.0777114	0.840021	Sptb
ENSMUSG00000021338	75.4648	1.00696	0.569797	1.76722	0.0771908	0.840021	Carmil1
ENSMUSG00000022587	123.095	-0.700899	0.396418	-1.76808	0.0770477	0.840021	Ly6e
ENSMUSG00000029094	55.1458	-0.785922	0.444462	-1.76825	0.0770187	0.840021	Afap1
ENSMUSG00000031671	7.67047	1.62521	0.922071	1.76256	0.0779739	0.840021	Setd6
ENSMUSG00000032816	9.29496	1.93632	1.09888	1.76209	0.0780547	0.840021	Igdcc4
ENSMUSG00000032846	19.6889	-1.09674	0.621363	-1.76506	0.0775544	0.840021	Zswim6
ENSMUSG00000033152	9.26389	-1.48243	0.840467	-1.76381	0.0777635	0.840021	Podxl2
ENSMUSG00000034248	14.3822	-1.39175	0.787405	-1.76751	0.0771422	0.840021	Slc25a37
ENSMUSG00000039509	11.5828	-1.62232	0.920569	-1.7623	0.078019	0.840021	Nup133
ENSMUSG00000043702	36.7117	0.909637	0.515271	1.76536	0.0775037	0.840021	Pde12
ENSMUSG00000052192	6.47929	-0.40833	0.231664	-1.7626	0.0779679	0.840021	Gm5963
ENSMUSG00000081544	2.50448	0.710356	0.402488	1.76491	0.0775782	0.840021	Gm13077
ENSMUSG00000059981	21.4347	-1.05454	0.598732	-1.76128	0.0781907	0.840572	Taok2
ENSMUSG00000021820	8.94738	-1.17078	0.668201	-1.75214	0.0797497	0.840774	Camk2g
ENSMUSG00000023044	21.0474	-1.39856	0.795967	-1.75706	0.0789084	0.840774	Csad
ENSMUSG00000024145	4.74872	1.60401	0.915024	1.75297	0.0796063	0.840774	Pigf
ENSMUSG00000024897	6.04799	-1.5239	0.866034	-1.75963	0.0784702	0.840774	Apba1
ENSMUSG00000029185	81.1069	-0.66369	0.378813	-1.75202	0.0797699	0.840774	Fam114a1
ENSMUSG00000029270	17.3764	1.74466	0.992334	1.75813	0.078725	0.840774	Fam69a
ENSMUSG00000029426	51.0301	-0.755631	0.431436	-1.75143	0.0798716	0.840774	Scarb2
ENSMUSG00000029470	29.4383	-1.05156	0.598744	-1.75628	0.07904	0.840774	P2rx4
ENSMUSG00000031963	13.9096	-1.7381	0.992185	-1.75179	0.0798106	0.840774	Bmper
ENSMUSG00000036599	105.87	0.686188	0.390876	1.75551	0.0791718	0.840774	Chst12
ENSMUSG00000037254	20.917	2.11926	1.21016	1.75122	0.0799079	0.840774	Itih2
ENSMUSG00000037679	50.0181	-0.683704	0.38988	-1.75363	0.0794943	0.840774	Inf2
ENSMUSG00000040550	15.1467	1.1594	0.661698	1.75217	0.0797452	0.840774	Otud6b
ENSMUSG00000052298	29.996	1.03866	0.591344	1.75643	0.0790142	0.840774	Cdc42se2
ENSMUSG00000055862	9.79904	-1.43276	0.816296	-1.7552	0.0792253	0.840774	Izumo4
ENSMUSG00000057177	17.5737	0.815713	0.46442	1.75641	0.0790181	0.840774	Gsk3a
ENSMUSG00000061882	1.07174	1.73016	0.983737	1.75877	0.0786171	0.840774	Ccdc62
ENSMUSG00000063889	16.0516	-1.15136	0.656441	-1.75394	0.0794404	0.840774	Crem
ENSMUSG00000068267	87.6342	0.706947	0.40242	1.75674	0.0789625	0.840774	Cenpb
ENSMUSG00000072941	1100.49	0.53032	0.302697	1.75198	0.079777	0.840774	Sod3
ENSMUSG00000044906	8.3725	1.7267	0.986409	1.75049	0.0800339	0.841205	4930503L19Rik
ENSMUSG00000020721	38.1846	0.849121	0.486102	1.7468	0.0806728	0.842056	Helz
ENSMUSG00000021759	117.496	0.767974	0.439948	1.7456	0.0808802	0.842056	Plpp1
ENSMUSG00000024581	13.1095	1.26829	0.725221	1.74883	0.0803208	0.842056	Napg
ENSMUSG00000028914	7.25818	-1.68448	0.9648	-1.74594	0.0808222	0.842056	Casp9
ENSMUSG00000030761	5.74503	-1.84839	1.0585	-1.74623	0.0807711	0.842056	Myo7a
ENSMUSG00000044017	112.42	-1.10889	0.635072	-1.74609	0.0807952	0.842056	Adgrd1
ENSMUSG00000047497	18.3582	1.48881	0.852527	1.74634	0.0807512	0.842056	Adamts12
ENSMUSG00000049482	3.74629	-1.5925	0.910482	-1.74907	0.0802787	0.842056	Ctu2
ENSMUSG00000082536	18.4755	0.23464	0.13432	1.74688	0.0806589	0.842056	Gm13456
ENSMUSG00000063049	11.5032	1.47811	0.847054	1.745	0.0809851	0.842262	Ing2
ENSMUSG00000005968	17.0716	1.6197	0.928817	1.74383	0.0811889	0.842611	Tuft1
ENSMUSG00000029826	48.2789	-0.809389	0.464122	-1.74391	0.0811742	0.842611	Zc3hav1
ENSMUSG00000035311	9.53732	1.31279	0.753755	1.74166	0.0815676	0.845656	Gnptab
ENSMUSG00000004285	34.3929	-0.592381	0.340424	-1.74013	0.0818371	0.845878	Atp6v1f
ENSMUSG00000021835	80.098	1.41585	0.813307	1.74085	0.0817097	0.845878	Bmp4
ENSMUSG00000021943	139.393	-1.84401	1.05973	-1.74008	0.0818454	0.845878	Gdf10
ENSMUSG00000038175	27.7988	1.0935	0.628755	1.73915	0.0820081	0.846676	Mylip
ENSMUSG00000031595	57.4579	1.22878	0.706933	1.73819	0.0821773	0.847539	Pdgfrl
ENSMUSG00000028607	8.42463	1.75523	1.01055	1.73691	0.0824038	0.848108	Cpt2
ENSMUSG00000035385	9.33475	-2.06842	1.19057	-1.73733	0.0823291	0.848108	Ccl2
ENSMUSG00000025409	5.64217	1.0078	0.581165	1.7341	0.0829	0.851445	Mbd6
ENSMUSG00000055805	4.84797	-1.79817	1.03688	-1.73422	0.0828791	0.851445	Fmnl1
ENSMUSG00000038349	5.66469	1.89351	1.09223	1.73362	0.0829861	0.851446	Plcl1
ENSMUSG00000001435	23.5566	-1.17184	0.681203	-1.72025	0.0853878	0.851465	Col18a1
ENSMUSG00000006360	449.479	-0.382589	0.221393	-1.7281	0.0839707	0.851465	Crip1
ENSMUSG00000009739	10.9881	-1.36998	0.791457	-1.73096	0.0834594	0.851465	Pou6f1
ENSMUSG00000014778	8.4633	1.48442	0.863097	1.71988	0.0854543	0.851465	Fhod1
ENSMUSG00000020409	20.0281	-1.22621	0.712499	-1.721	0.0852511	0.851465	Slu7
ENSMUSG00000020777	38.341	0.837438	0.487526	1.71773	0.0858459	0.851465	Acox1
ENSMUSG00000023104	22.7556	1.22366	0.709417	1.72489	0.0845478	0.851465	Rfc2
ENSMUSG00000024908	47.0374	0.75741	0.441219	1.71663	0.0860463	0.851465	Ppp6r3
ENSMUSG00000026032	13.1904	0.655208	0.378517	1.73099	0.0834543	0.851465	Ndufb3
ENSMUSG00000026510	36.2414	0.909172	0.525667	1.72956	0.083709	0.851465	Trp53bp2
ENSMUSG00000026657	8.51469	1.66942	0.971085	1.71913	0.0855907	0.851465	Frmd4a
ENSMUSG00000026918	21.6123	0.729897	0.421318	1.73241	0.0831998	0.851465	Brd3
ENSMUSG00000027698	12.292	1.51638	0.875536	1.73195	0.0832827	0.851465	Nceh1
ENSMUSG00000028020	3.548	-1.70167	0.986642	-1.72471	0.0845806	0.851465	Glrb
ENSMUSG00000028099	14.0432	1.54539	0.898962	1.71908	0.0855999	0.851465	Polr3c
ENSMUSG00000029708	5.49481	-1.66756	0.967943	-1.72279	0.0849267	0.851465	Gcc1
ENSMUSG00000030733	14.3407	-1.18209	0.68759	-1.71918	0.0855817	0.851465	Sh2b1
ENSMUSG00000032374	116.038	0.727191	0.421006	1.72727	0.0841192	0.851465	Plod2
ENSMUSG00000038773	18.2951	-0.953442	0.552912	-1.7244	0.0846355	0.851465	Kdm3b
ENSMUSG00000039191	31.4819	0.546337	0.316432	1.72656	0.0842471	0.851465	Rbpj
ENSMUSG00000040170	20.3724	-2.0936	1.2095	-1.73097	0.0834574	0.851465	Fmo2
ENSMUSG00000040943	59.8693	-0.779349	0.450829	-1.7287	0.0838625	0.851465	Tet2
ENSMUSG00000042379	0.304563	0.814637	0.473301	1.72118	0.0852181	0.851465	Esm1
ENSMUSG00000046532	17.0019	-1.50332	0.874568	-1.71893	0.0856279	0.851465	Ar
ENSMUSG00000050708	57.0311	-0.339238	0.196106	-1.72987	0.0836537	0.851465	Ftl1
ENSMUSG00000051323	20.0753	-1.71601	0.994693	-1.72517	0.0844968	0.851465	Pcdh19
ENSMUSG00000052748	18.5157	1.11363	0.64355	1.73044	0.0835514	0.851465	Swt1
ENSMUSG00000059890	32.373	-1.03316	0.600653	-1.72006	0.0854213	0.851465	Ube4a
ENSMUSG00000061559	31.3461	0.84505	0.490285	1.72359	0.0847821	0.851465	Wdr61
ENSMUSG00000067870	10.205	0.267355	0.155674	1.7174	0.0859056	0.851465	Rpl31-ps8
ENSMUSG00000069516	0.619532	0.978773	0.570395	1.71596	0.0861699	0.851465	Lyz2
ENSMUSG00000074748	33.5853	-0.863037	0.502603	-1.71714	0.0859543	0.851465	Atxn7l3b
ENSMUSG00000075012	1.58313	1.82489	1.06069	1.72048	0.0853458	0.851465	Fjx1
ENSMUSG00000082632	0.443048	0.851625	0.495366	1.71918	0.0855808	0.851465	Gm13365
ENSMUSG00000085133	12.7662	1.50562	0.875706	1.71933	0.0855551	0.851465	B930095G15Rik
ENSMUSG00000085939	179.342	-0.315396	0.183681	-1.71709	0.0859632	0.851465	Cd63-ps
ENSMUSG00000089774	180.854	0.943289	0.549671	1.7161	0.0861441	0.851465	Slc5a3
ENSMUSG00000045573	96.2735	-1.73046	1.00889	-1.71521	0.0863064	0.851964	Penk
ENSMUSG00000041115	15.2111	1.02355	0.596941	1.71466	0.0864069	0.852107	Iqsec2
ENSMUSG00000032231	1034.81	-0.343394	0.200491	-1.71277	0.0867555	0.852528	Anxa2
ENSMUSG00000039384	9.40859	-1.47898	0.863607	-1.71256	0.0867941	0.852528	Dusp10
ENSMUSG00000102543	7.18422	-1.74249	1.01676	-1.71377	0.0865707	0.852528	Pcdhgc5
ENSMUSG00000104126	13.1226	0.405806	0.236937	1.71272	0.0867638	0.852528	Gm37486
ENSMUSG00000028619	1.72691	1.81641	1.06155	1.7111	0.0870628	0.85432	Tceanc2
ENSMUSG00000031826	27.6385	-0.958869	0.560957	-1.70934	0.0873872	0.856017	Usp10
ENSMUSG00000034751	30.9065	1.13022	0.661265	1.70917	0.087419	0.856017	Mast4
ENSMUSG00000099377	4.16861	1.04117	0.609315	1.70876	0.0874952	0.856017	Gm6159
ENSMUSG00000054598	0.447403	0.908294	0.53183	1.70787	0.0876614	0.856797	9130230L23Rik
ENSMUSG00000018160	23.1741	-0.924976	0.542594	-1.70473	0.088245	0.85957	Med1
ENSMUSG00000027254	23.3459	-1.10825	0.650262	-1.70431	0.0883239	0.85957	Map1a
ENSMUSG00000046311	11.0706	-1.52569	0.895225	-1.70425	0.088334	0.85957	Zfp62
ENSMUSG00000061665	13.352	-0.835278	0.490184	-1.70401	0.0883792	0.85957	Cd2ap
ENSMUSG00000067194	56.8657	0.71811	0.421091	1.70536	0.088128	0.85957	Eif1ax
ENSMUSG00000048126	564.614	0.56826	0.333717	1.70282	0.0886023	0.860895	Col6a3
ENSMUSG00000033565	75.5707	0.57763	0.339538	1.70122	0.0889008	0.861259	Rbfox2
ENSMUSG00000040054	20.8583	0.981802	0.576962	1.70168	0.0888161	0.861259	Baz2a
ENSMUSG00000052926	10.8083	1.49557	0.878768	1.70189	0.088776	0.861259	Rnaseh2a
ENSMUSG00000102876	0.671429	-1.21923	0.716881	-1.70074	0.0889913	0.861293	Gm37136
ENSMUSG00000044408	31.0211	-0.766752	0.45111	-1.6997	0.0891869	0.861606	Sptssa
ENSMUSG00000061410	50.2337	0.685286	0.403193	1.69965	0.0891977	0.861606	Zcchc14
ENSMUSG00000033111	12.4291	1.19939	0.706164	1.69846	0.0894203	0.861752	3830406C13Rik
ENSMUSG00000041308	60.1872	-0.680012	0.400436	-1.69818	0.0894739	0.861752	Sntb2
ENSMUSG00000046516	2.45214	1.08039	0.63606	1.69856	0.0894023	0.861752	Cox17
ENSMUSG00000031388	6.45682	-1.20316	0.709253	-1.69638	0.0898147	0.864194	Naa10
ENSMUSG00000022552	21.6012	1.06846	0.63053	1.69455	0.0901609	0.866066	Sharpin
ENSMUSG00000032902	16.7331	-1.3857	0.817999	-1.69402	0.090262	0.866066	Slc16a1
ENSMUSG00000041264	23.1539	1.16297	0.686631	1.69374	0.0903147	0.866066	Uspl1
ENSMUSG00000101372	1.87711	0.793398	0.468494	1.69351	0.0903592	0.866066	Gm19028
ENSMUSG00000020149	115.812	0.506642	0.299366	1.69238	0.0905727	0.866435	Rab1
ENSMUSG00000031755	6.56718	1.83986	1.0871	1.69244	0.090562	0.866435	Bbs2
ENSMUSG00000025323	3.42932	1.3659	0.807862	1.69076	0.0908826	0.86856	Sp4
ENSMUSG00000001062	7.07993	-1.59753	0.945606	-1.68943	0.0911377	0.869703	Vps9d1
ENSMUSG00000028382	52.4121	-0.541758	0.320716	-1.68922	0.0911778	0.869703	Ptbp3
ENSMUSG00000031657	8.19175	-1.35024	0.799647	-1.68854	0.0913072	0.870099	Heatr3
ENSMUSG00000003762	13.1718	1.3626	0.807515	1.6874	0.0915263	0.870511	Coq8b
[truncated: 8,861 more rows]

## Sheet: AEC like DEG
Ensembl ID	baseMean	log2Fold Change	lfcSE	stat	P-value	Padj	Gene Symbol
[truncated: 9,306 more rows]

## Sheet: SEC like DEG
Ensembl ID	baseMean	log2Fold Change	lfcSE	stat	P-value	Padj	Gene Symbol
[truncated: 9,742 more rows]

[truncated: 8 more sheets: Young MSC-L like GSEA, Old MSC-L like GSEA, Young OPr like GSEA, Old OPr like GSEA, Young MSC-S like GSEA, Old MSC-S like GSEA, AEC like IPA, SEC like IPA]
