# Supplementary material for: Stromal inflammation is a targetable driver of hematopoietic aging
Source: Research Square preprint supplement (doi:10.21203/rs.3.rs-1065222/v1), 2021-11-12
Supplement: Supplementary file 3 [file fefb463141fe13cd41f4effd.xlsx]

## Sheet: YvO SAM scores
HSC - upregulated in young				HSC - upregulated in old				MPP3 - upregulated in young				MPP3 - upregulated in old				MPP4 - upregulated in young				MPP4 - upregulated in old
Gene Symbol	Probe ID	SAM score		Gene Symbol	Probe ID	SAM score		Gene Symbol	Probe ID	SAM score		Gene Symbol	Probe ID	SAM score		Gene Symbol	Probe ID	SAM score		Gene Symbol	Probe ID	SAM score
Ggt5	10364072	21.1983		Oprk1	10344653	-12.6718		LOC638407	10456246	11.2711		Thoc6	10448292	-7.86116		Gstt4	10370007	11.7017		Nfatc3	10574962	-12.9999
EG630499	10450069	16.1395		Akr1b8	10537146	-12.5543		Rbm16	10441344	8.86897		Nfe2l2	10483809	-7.60534		Tchp	10524572	11.6806		Tnni3k	10502982	-11.487
Mcm6	10357436	11.6414		BC085271	10598180	-11.7497		N4bp2l2	10535946	8.50602		Osbpl7	10380739	-7.21264		Tnfaip6	10472050	9.12696		Tm9sf2	10417147	-11.0517
Mcm8	10476362	10.4338		Rbm38	10479041	-11.0183		Ldb1	10468159	8.43465		Ide	10467230	-7.03198		Klf2	10572800	9.03634		LOC100044428	10601610	-10.0434
1700023L04Rik	10536973	10.3927		Scml4	10362861	-10.9086		Foxred2	10430255	8.23197		Rffl	10389087	-6.54949		Ndufb7	10573194	8.76235		Clptm1l	10406067	-8.96926
Rras2	10567043	10.0802		1110018G07Rik	10401564	-10.4386		Krtcap2	10493484	7.43702		Bex6	10435009	-6.14529		Efna5	10452419	8.40567		1700029P11Rik	10425630	-8.93798
Eif1ad	10460573	10.0673		Gpr125	10529957	-10.3865		Mrps12	10561513	7.41454		Hsp90b1	10371482	-6.1052		Mlxipl	10526277	8.36672		EG236749	10599054	-8.74959
Ebi3	10445977	9.87758		Masp2	10510399	-10.3476		Plag1	10511333	7.15061		Osbpl2	10479335	-6.07199		Foxg1	10395596	8.19279		Thy1	10584628	-8.49691
0610010F05Rik	10384691	9.81604		Pign	10357008	-10.3271		Dynll1	10532984	6.90348		Ube2v2	10540273	-6.06088		Psmg4	10404531	8.09072		Muc15	10474467	-8.43339
Abcd1	10600235	9.64843		Suv420h2	10549700	-9.88846		B930078G14Rik	10570008	6.8633		Wdr24	10442893	-5.97983		Ankrd13b	10388648	8.01116		Galnt6	10432661	-8.36738
Bag2	10353750	9.63003		Kif21a	10431659	-9.63495		Irf6	10352815	6.67595		Xlr3c	10605007	-5.66633		Ptprn	10355813	7.73731		Cd74	10456005	-8.17355
Pygl	10400844	9.4386		Lonrf3	10599192	-9.57249		Tada2l	10389245	6.35572		9630013D21Rik	10515086	-5.61155		Hspb9	10381170	7.55505		Fanci	10554281	-8.15541
Rps6kc1	10361031	9.42582		Csrp2	10366293	-9.4091		Calml3	10407416	6.35197		Birc7	10479483	-5.57271		Supt5h	10561401	7.50253		2810408A11Rik	10387723	-8.01375
A130057D12Rik	10594998	9.38187		Hk2	10545588	-9.28729		Sprr2k	10493886	6.26846		1700112E06Rik	10413152	-5.56259		Fam126a	10528527	7.38616		Tlr3	10578493	-7.9822
Ctss	10494271	9.19292		Slc12a3	10574059	-9.16763		Eid2	10551483	6.22166		Rfx7	10586920	-5.55279		Pou6f2	10407929	7.21429		OTTMUSG00000005647	10376052	-7.83104
Ly9	10360158	8.85448		Casp4	10582997	-9.10853		Trp53inp1	10503259	6.11868		Pkp4	10472212	-5.53953		1700021A07Rik	10362062	7.19457		4930547N16Rik	10371591	-7.70403
Dhfr	10406581	8.77365		Mllt3	10514255	-8.78996		Trappc5	10569886	5.94518		Galnt3	10483249	-5.32961		Hdgfrp2	10446044	7.18783		Hivep2	10361807	-7.48508
Tcam1	10382083	8.75794		Krt15	10391025	-8.67692		Prkacb	10502732	5.94011		Gm650	10607473	-5.29096		Nudt17	10500378	7.18775		Nt5dc3	10365518	-7.4808
Rbbp7	10603011	8.67517		Glra3	10571829	-8.58622		Myeov2	10356677	5.92736		Sh2d1b1	10351477	-5.27863		Il9	10409586	7.10243		Rorb	10466587	-7.44311
Aldh18a1	10467470	8.61499		Fyb	10422760	-8.5363		Cd247	10351353	5.85408		4933424B01Rik	10549341	-5.2737		BC016201	10580854	6.98526		Ffar2	10562117	-7.35254
Itm2a	10606369	8.09641		ENSMUSG00000072769	10523977	-8.47775		EG240921	10360367	5.67354		Mbd1	10456622	-5.26796		Tpm2	10512499	6.97008		Ptger3	10497079	-7.30761
2500003M10Rik	10499847	8.09354		Sh3bgrl	10601449	-8.45413		Esrp2	10581455	5.67185		Glb1	10589889	-5.21456		Svip	10563820	6.86498		Selm	10373768	-7.15756
Epcam	10447383	8.08108		Cacna1e	10358928	-8.35288		Pftk1	10527940	5.66623		Ccdc91	10542842	-5.18167		Atrnl1	10464251	6.76391		Spo11	10479010	-7.10339
Vegfc	10571788	8.05244		Plscr1	10587792	-8.28856		Fdx1	10593483	5.62412		Vps16	10476136	-5.16307		Scg3	10595033	6.74013		Gpr172b	10424922	-7.03645
Ifne	10514335	7.9593		Fli1	10592067	-8.19456		Spib	10562812	5.61235		Zbtb22	10444066	-5.15527		Prmt1	10563014	6.67668		Tmem156	10530156	-7.01843
Wdr5	10470427	7.9067		Pam	10356968	-8.19113		Zbtb3	10461217	5.53466		Tbl1xr1	10491056	-5.09675		Rnaseh2c	10460626	6.66468		Krtap15	10436752	-6.89495
Fignl1	10384373	7.8751		Gda	10466659	-8.16587		Mx2	10437224	5.44747		Stk16	10347552	-5.0771		Stard10	10555460	6.39448		Skint4	10507062	-6.86966
Fam110b	10503118	7.86813		Clec1a	10548367	-8.07719		Trim46	10499514	5.32451		Tnfaip2	10398665	-5.0714		Tmem132d	10534002	6.34918		Zik1	10559964	-6.72783
Cdc25a	10589420	7.8136		Plcl1	10346330	-8.06497		Rpgrip1	10414663	5.31312		Tax1bp1	10538318	-5.03975		Plag1	10511333	6.30724		Orm3	10505445	-6.67912
Map3k13	10434629	7.74841		Cnpy1	10528864	-8.00658		Grasp	10427026	5.26574		Eps15	10506939	-5.01164		Eya4	10368243	6.20035		Olfr33	10566168	-6.67807
Fntb	10396699	7.70681		Ap3b1	10406681	-7.84301		Sirt4	10532999	5.23478		Prpf3	10500253	-4.9936		Tulp1	10449435	6.18533		Olfr971	10584512	-6.6025
Snrpa1	10553993	7.60271		Cfl2	10400350	-7.82016		Lrrn3	10400126	5.23442		Soat1	10359161	-4.97098		Csn1s2a	10522845	6.1463		LOC674717	10361352	-6.60006
Hormad2	10383853	7.56983		Chgb	10476355	-7.72686		Tmbim4	10366630	5.2214		Lars	10458607	-4.92242		Theg	10370573	6.12301		Esco2	10420877	-6.58572
ENSMUSG00000055181	10474371	7.55375		BC005764	10370651	-7.65614		Pex11a	10564805	5.20278		Psma4	10585474	-4.89374		4922505E12Rik	10360828	6.11952		C130021O09Rik	10467840	-6.54907
Mamdc2	10466712	7.54755		Plscr2	10587799	-7.50046		Nat6	10588696	5.13131		Mrpl9	10494060	-4.82727		ENSMUSG00000052236	10540289	6.11536		Clec4e	10547664	-6.50198
Nat11	10465638	7.54583		Taar5	10362156	-7.47636		Plxdc2	10469457	5.11195		Llph	10603702	-4.75653		Snora30	10557703	6.10108		Tlr6	10530151	-6.49887
Creb3	10504349	7.54141		3110082J24Rik	10528925	-7.42662		Ifnar2	10436830	5.02483		Lims1	10363265	-4.69786		Dnaja2	10580370	6.0987		Dhx32	10568651	-6.48442
Siah2	10498332	7.51318		Soat1	10359161	-7.33625		Klhl28	10400572	5.01204		Tfg	10439991	-4.65309		Sfrs16	10560551	6.08749		Ulk2	10386789	-6.21882
Myl10	10526493	7.50006		Ubash3b	10592515	-7.31314		C4b	10450242	4.96678		Sptlc1	10409294	-4.63822		Banp	10576073	6.05951		Traf1	10481949	-6.15339
Cyp51	10527920	7.48075		Klhl4	10601519	-7.31263		Cdca5	10460738	4.94314		B4galt1	10512129	-4.63086		ENSMUSG00000052098	10517742	6.03022		Mef2a	10564451	-6.08984
Eepd1	10583920	7.46158		Spns1	10567838	-7.29724		Spock1	10409616	4.92833		Sirt7	10393866	-4.59473		Tspan3	10593842	6.00689		Ide	10467230	-6.08185
Xrcc5	10347232	7.38351		Ccdc50	10434869	-7.22119		Ggct	10544906	4.90268		Fndc3a	10421488	-4.50909		Lgi3	10416279	5.99547		C7	10427436	-6.01371
Nup133	10582599	7.37928		5930403N24Rik	10362534	-7.13588		Vapb	10479077	4.88549		OTTMUSG00000011960	10469782	-4.50819		Sec22b	10494583	5.92244		Olfr1358	10364381	-5.99136
1700061G19Rik	10446190	7.28963		Mmrn1	10538706	-7.12477		Hipk1	10500813	4.8702		Mirhg1	10416945	-4.46474		Ptprcap	10460371	5.914		Clec9a	10542181	-5.94592
Gna15	10371220	7.28306		Krt79	10432897	-7.10735		Tmem201	10518714	4.86541		Cdca8	10516246	-4.44994		2510002D24Rik	10434248	5.83883		Hoxb2	10380660	-5.91463
Lix1l	10494445	7.28256		Ccbe1	10459496	-7.05232		AI662250	10452142	4.85023		1700016M24Rik	10429462	-4.4407		Tmcc2	10357698	5.83287		Six1	10400967	-5.90997
Clnk	10529711	7.26314		Mcc	10458731	-7.0406		Tff1	10449666	4.84259		Ddx46	10405511	-4.40182		A930041I02Rik	10482301	5.80372		Chac2	10384956	-5.8956
Hdac1	10516605	7.2486		Ralgds	10470564	-6.99351		Dbil5	10378765	4.80273		Pbk	10416037	-4.40155		Gigyf1	10526587	5.76585		Gpm6a	10571815	-5.89364
Nrap	10468593	7.15696		Pcdh18	10498018	-6.89159		Fbrs	10557644	4.79779		Ntng2	10481349	-4.37929		Slfn2	10379630	5.68057		Nmt1	10381668	-5.88332
Thap1	10571106	7.12589		Gh	10392135	-6.86271		Spag9	10380341	4.77656		Pa2g4	10373454	-4.35329		Tac4	10380506	5.67017		Oprk1	10344653	-5.8831
Fech	10459391	7.11414		Nek5	10577471	-6.81177		Mrpl28	10442948	4.77285		Ipo8	10549447	-4.34584		Rtn4rl2	10484482	5.67016		Ppap2b	10506488	-5.83061
OTTMUSG00000015975	10488804	7.03202		Epha4	10355893	-6.80371		Tcfe2a	10370837	4.7593		Il4i1	10552743	-4.33371		Cyb561d2	10596664	5.66301		Polr2j	10526482	-5.79002
Caprin2	10549473	7.02607		Olfr922	10584462	-6.76149		Tdrd3	10416709	4.75756		Lyar	10521555	-4.32948		Camk4	10454632	5.65635		Psma4	10585474	-5.69526
AI747699	10467110	7.02035		EG432982	10426905	-6.72741		Styxl1	10534519	4.75576		Pln	10363157	-4.31046		Fxyd1	10562211	5.63298		Tmtc3	10372121	-5.59077
Hsd17b7	10359917	6.99948		Ttc18	10417841	-6.66416		Fbxl17	10452430	4.70944		Chmp5	10504008	-4.30612		Zswim4	10580139	5.55189		Trdmt1	10480224	-5.58489
Msh6	10447417	6.97453		Selp	10351206	-6.66007		Klhl1	10421934	4.67372		Khk	10520612	-4.26238		4933409G03Rik	10472449	5.53481		Glipr1	10372410	-5.57535
Polr2b	10522716	6.89126		Hspa2	10396652	-6.63445		A130022J15Rik	10546567	4.67188		Gpr128	10440002	-4.24553		1810049H13Rik	10393801	5.49791		2010204N08Rik	10498659	-5.56944
Myst1	10557831	6.87279		Mef2c	10406434	-6.59275		Meg3	10398326	4.64277		Zfp677	10442194	-4.23832		4933417A18Rik	10404566	5.48236		Spata17	10360942	-5.56583
Gmnn	10408321	6.83792		Gata6	10453857	-6.51751		Ubtd2	10375079	4.62871		Arf3	10432256	-4.22673		ENSMUSG00000075265	10439084	5.47317		AI504432	10495186	-5.56256
Rbm7	10593213	6.83299		Unc5cl	10445803	-6.49707		Naip3	10407940	4.57609		Gng12	10538842	-4.20239		Brunol5	10371188	5.39617		Vsig1	10602081	-5.55458
Parvg	10425866	6.80552		Dmrtc1c	10606138	-6.45352		2900026A02Rik	10532669	4.56792		Ppp2r5d	10451434	-4.20154		OTTMUSG00000012596	10482791	5.33343		B3galt1	10472436	-5.55454
Rai12	10387757	6.79769		Nfe2l1	10390271	-6.41797		Prpf4	10505282	4.55561		Gosr1	10388579	-4.2		Lrrc68	10560532	5.32621		Ccdc14	10435329	-5.54545
Nono	10601164	6.77948		Sdpr	10346164	-6.41205		Tmem64	10503410	4.53598		1200009F10Rik	10365716	-4.19341		Mkrn2	10540923	5.31537		Olfr1056	10484590	-5.54193
Gabpb1	10487252	6.75409		Efemp2	10460603	-6.39021		Mrps2	10470547	4.50305		Tlr6	10530151	-4.1564		EG547328	10414960	5.29177		Ndst3	10501924	-5.53717
Mtbp	10424188	6.71279		Diap1	10458430	-6.26865		Ccr10	10391373	4.5023		Bri3bp	10525887	-4.15438		Defb25	10488652	5.27714		EG633736	10602176	-5.50982
Mlec	10532954	6.66237		Ampd3	10556302	-6.24486		Steap4	10519497	4.45688		Zfp652	10380560	-4.13892		Zfp516	10457040	5.26485		Larp6	10586011	-5.50806
Cd34	10352905	6.64539		LOC545291	10467826	-6.24148		Sox3	10604837	4.45565		Aurka	10490104	-4.13356		Eif3i	10516640	5.25063		Rbm4	10464813	-5.49785
BC016495	10461909	6.64442		Nckap1	10484318	-6.20994		Gm2049	10490271	4.45282		Arhgap19	10467637	-4.1061		EG545790	10531970	5.23057		Sfmbt2	10469167	-5.49227
Sema4b	10554375	6.63557		Cgref1	10529034	-6.20154		EG210714	10568432	4.44322		Ppil3	10354832	-4.07477		Svs1	10538179	5.23019		Klhl4	10601519	-5.42589
Wrap53	10387492	6.61957		D10Wsu52e	10371432	-6.14509		Hnf4a	10478389	4.43695		Xlr3a	10604996	-4.06586		LOC100040329	10608304	5.20502		Pdgfrb	10456046	-5.41148
Tagap1	10447629	6.60961		Osbpl9	10515051	-6.13634		ENSMUSG00000026654	10445235	4.42452		Ampd3	10556302	-4.02065		Igsf1	10604473	5.16544		Gas2	10553521	-5.39226
Chchd3	10543835	6.60536		Cysltr2	10421517	-6.12508		Cenpm	10430825	4.41163		Ogfrl1	10353524	-4.01686		Clk4	10375820	5.1626		EG629133	10394922	-5.37872
Olfr134	10445176	6.60208		Gprin3	10545065	-6.1201		ENSMUSG00000069448	10454061	4.41143		Snx7	10501762	-4.0136		EG665154	10590888	5.12845		2310057M21Rik	10568521	-5.35702
EG628070	10493380	6.59236		Olfr867	10591214	-6.1142		Ece1	10509441	4.39922		Copb2	10588049	-4.00933		Ryr3	10485840	5.12741		Large	10579744	-5.34265
Degs1	10360789	6.58413		Apol6	10425031	-6.08803		Lrrc8c	10523766	4.39903		Hmg1l1	10552337	-4.00758		Sytl1	10517009	5.11624		Gm239	10372557	-5.30694
Ttc7	10447361	6.5704		Mrgprb3	10563764	-6.08404		Cbx2	10383055	4.39073		Timm23	10418804	-4.00494		Olfr473	10556117	5.11346		Pld4	10398907	-5.30195
Dusp10	10352448	6.54314		Mkl2	10433639	-6.06261		Fkbp7	10483865	4.38164		Dhx8	10381477	-3.99974		Bcl7c	10568282	5.11261		Th	10569370	-5.28603
Tap1	10444244	6.53263		Resp18	10355836	-6.02318		RP23-100C5.8	10487700	4.36669		Vps45	10500304	-3.99676		Olfr557	10555734	5.10888		Tacc3	10521090	-5.28242
Tmem48	10506680	6.49985		Samsn1	10440393	-6.00845		OTTMUSG00000007987	10506148	4.36664		EG432534	10374325	-3.99618		Slc16a11	10377790	5.09226		Epha6	10440216	-5.26642
Cdk10	10576258	6.47543		Gpr142	10382421	-6.0002		Lass4	10569972	4.36556		Prkci	10491279	-3.96619		Gjb3	10516484	5.08246		Lamp3	10438435	-5.26624
Nqo2	10404496	6.45123		Rps6ka2	10441565	-5.97355		Shisa5	10589350	4.36078		Etfa	10593789	-3.96381		D330028D13Rik	10538214	5.06602		Sephs2	10568221	-5.2413
Emcn	10496359	6.44692		4632404H12Rik	10499652	-5.94823		Taz	10600357	4.32423		Usp2	10584634	-3.95619		Wdyhv1	10424252	5.05805		Pdgfra	10522503	-5.23201
Ripk2	10511703	6.43137		Dolpp1	10471036	-5.94574		Odf3b	10431558	4.31665		Tmem2	10462005	-3.93313		Poldip3	10430945	5.05737		C030030A07Rik	10548871	-5.21648
Rnase6	10414548	6.42519		Zfp53	10442211	-5.92488		Fis1	10526508	4.31221		Alox15	10387855	-3.93112		C1qtnf9	10415737	5.05097		Slc22a9	10465715	-5.21213
Cd86	10439312	6.42296		Ugt2b36	10531051	-5.90536		Folr1	10566034	4.31021		Mrps23	10380238	-3.92942		Dhx30	10597103	5.04718		Fam83b	10595070	-5.19265
2010012O05Rik	10463695	6.42249		Foxk2	10383545	-5.89209		Gm6236	10490833	4.29207		Ccdc6	10363845	-3.90648		Ccdc92	10533869	5.04234		Olfr232	10461707	-5.17802
Ndufa3	10549546	6.41362		Eif3c	10567941	-5.88084		Trp53bp1	10486722	4.28547		EG547109	10587659	-3.90476		Entpd3	10590306	5.0362		Olfr452	10537795	-5.15338
EG631319	10600821	6.40088		6330578E17Rik	10353993	-5.88037		Nphp4	10510767	4.28101		Dbt	10495549	-3.89797		4933434E20Rik	10493612	5.01922		Dcp1a	10413530	-5.14811
2810407C02Rik	10492220	6.32331		Mt4	10574013	-5.86677		Plagl2	10488697	4.27865		Ncapg	10521731	-3.89212		Trp53inp2	10477644	5.01754		BC051665	10409840	-5.13181
Rsad2	10399710	6.3135		Lrp5	10464504	-5.86632		Hmga2	10372796	4.27449		Ripk1	10404506	-3.89147		Taf10	10566525	5.00289		Olfr3	10482121	-5.12083
Dhrs7	10400941	6.30752		Lbx2	10539316	-5.86312		Pla2g4b	10475113	4.26611		0610012H03Rik	10474307	-3.87939		4930548H24Rik	10520796	4.96246		Stat1	10346191	-5.11716
Sla	10429128	6.29007		EG218444	10406622	-5.86301		Ndufa3	10549546	4.25385		Myo1b	10354432	-3.85909		6720401G13Rik	10604505	4.95682		Sfxn1	10405236	-5.11557
OTTMUSG00000010750	10518224	6.28646		App	10440491	-5.85758		Lck	10516620	4.24905		Incenp	10465861	-3.8458		Tfdp1	10582981	4.93461		Gabrb1	10522324	-5.09332
Cib1	10564869	6.28551		Muc13	10435288	-5.8243		Olfr61	10558661	4.24371		Jagn1	10540676	-3.82398		Trav13-4/dv7	10414882	4.93337		Sdccag10	10411927	-5.07547
Acvr1	10482824	6.28381		Zpld1	10439917	-5.82237		Med24	10390653	4.2256		Gdi2	10403258	-3.81616		Lrp8	10506714	4.92156		Olfr630	10566241	-5.07415
Cd52	10517165	6.27465		Trim65	10393113	-5.82212		Zfp777	10544547	4.22237		Nop2	10541845	-3.81349		1810007M14Rik	10440881	4.90887		Olfr930	10584476	-5.07023
Srpk3	10600284	6.2654		EG240055	10443007	-5.80384		Vasn	10433274	4.21404		Rsl1d1	10437737	-3.79249		Abl1	10471201	4.9		Cdc27	10392012	-5.0608
Postn	10492021	6.25271		Zfp445	10597900	-5.80276		Btbd3	10476538	4.20563		Pdia3	10475335	-3.79076		ENSMUSG00000073610	10454647	4.88007		Gnptab	10365601	-5.05348
Ufd1l	10434233	6.24365		Sgcz	10578253	-5.78363		Fundc1	10603785	4.1873		Mia3	10598198	-3.78659		Kcne3	10555297	4.87999		Siah3	10416485	-5.05314
Etaa1	10384486	6.21893		Marchf6	10428020	-5.77183		Aig1	10367973	4.18555		Top3b	10433910	-3.78071		Tagln3	10439695	4.87628		Ppil4	10361682	-5.04171
Pfkm	10426557	6.216		Pkdcc	10447130	-5.75376		9030224M15Rik	10362711	4.1837		Fam13a	10545045	-3.76945		1700021K14Rik	10588819	4.86701		Pvr	10560709	-5.01729
Dpysl5	10520527	6.19514		Mgat5	10349404	-5.74575		Msc	10353213	4.17586		Psmd4	10500054	-3.76466		Prss32	10442357	4.86108		Slc25a17	10430711	-4.99867
Rwdd4a	10571728	6.16838		Defa5	10570732	-5.7447		Stk36	10347427	4.16893		Lzic	10510464	-3.76103		Lass5	10432527	4.85683		EG244595	10580593	-4.99084
5330438D12Rik	10366519	6.16745		Gpr171	10498345	-5.74157		Zfyve16	10411059	4.16437		Coq3	10503584	-3.75876		Snora44	10508721	4.85316		Tnip3	10538791	-4.96867
Dclre1a	10468639	6.14678		Kcnma1	10418053	-5.73711		Slc39a4	10430006	4.16016		Myl6b	10373400	-3.73997		Bola2	10557450	4.85288		Chrng	10348166	-4.95866
Hey1	10497203	6.13066		B230216G23Rik	10542656	-5.72921		Speg	10347593	4.14695		2810409K11Rik	10559825	-3.73996		D630004N19Rik	10565900	4.84745		EG243872	10550738	-4.93588
Klk1	10552546	6.12577		Strm	10396862	-5.68912		Col1a2	10536220	4.12096		Atg10	10410959	-3.7359		EG635895	10441899	4.84601		Ifngr1	10361897	-4.92827
Rgl1	10358733	6.09467		Slc7a15	10399365	-5.66715		Pank2	10476287	4.1207		Ndufb10	10448737	-3.73433		4732463B04Rik	10401418	4.83685		Gbp3	10496580	-4.88338
Slc44a4	10444554	6.08602		Olfr298	10565397	-5.66223		Cldn22	10571745	4.119		Utp14a	10599498	-3.72561		Hgs	10383365	4.83497		Hemgn	10512757	-4.87504
Mybl1	10353010	6.06715		ENSMUSG00000072936	10521964	-5.64572		Kcna10	10495199	4.11279		Xlr	10604656	-3.72531		Aqp7	10512145	4.82795		Olfr43	10388302	-4.87425
Gimap6	10544583	6.05448		Eltd1	10496872	-5.63944		Mboat2	10394990	4.07002		Drg1	10383671	-3.72382		Tex28	10605252	4.82763		Ckap2l	10487577	-4.85835
Cwc15	10583254	6.03193		Pfdn2	10351583	-5.62878		Igk-V1	10538880	4.06731		2700062C07Rik	10454326	-3.71395		Polr1e	10504518	4.82462		Pde8b	10411171	-4.84331
Dpy19l3	10562500	6.00266		C230081A13Rik	10593856	-5.61415		Eps15l1	10579663	4.03229		Map3k9	10401343	-3.71383		Vwc2	10374315	4.82053		Pldn	10475525	-4.83866
Slc39a9	10396896	5.99846		Cyr61	10502655	-5.59667		Ythdf3	10490931	4.01866		Midn	10364702	-3.70763		Grhl1	10394954	4.81798		Mical1	10362767	-4.82148
Oxct1	10422608	5.98643		Spint1	10474936	-5.59372		Wdr81	10388451	4.00565		Prmt7	10574996	-3.70591		Tjap1	10451248	4.79946		4933427D14Rik	10388132	-4.81055
OTTMUSG00000007428	10513420	5.98011		EG665097	10424102	-5.58731		Atp7b	10577449	4.00433		Slmap	10418218	-3.70543		Isl2	10585535	4.79848		Abhd2	10554269	-4.75573
Fam109b	10425749	5.97433		Msi1	10524684	-5.58485		Chrm3	10407591	4.00339		Sele	10351182	-3.68037		Osbp2	10383767	4.78805		Tnfsf8	10513729	-4.73223
Dpp9	10452000	5.97187		Tgfbi	10405587	-5.58225		Mif	10590972	4.00042		Vps72	10494153	-3.68007		Srebf1	10386473	4.78388		Olfr812	10373647	-4.73034
Mrps15	10508089	5.95593		Rp1	10352928	-5.5778		EG633457	10403006	3.99696		Serpinb1a	10408557	-3.67157		Zc3h7a	10437712	4.77702		Itpka	10475019	-4.70455
Wdr12	10550098	5.95109		Tmem44	10438942	-5.57496		Car13	10490903	3.99428		Nasp	10515337	-3.65751		2510049I19Rik	10572779	4.76835		2310014L17Rik	10550059	-4.70339
OTTMUSG00000000618	10408364	5.93124		Zfx	10605729	-5.56255		Dmwd	10550564	3.99035		Rad1	10423068	-3.64879		Tenc1	10427095	4.7509		Etfa	10593789	-4.70316
Dnali1	10516259	5.92867		Chmp4b	10477572	-5.56247		Elf2	10498038	3.98615		Supt16h	10419611	-3.63508		Trappc5	10569886	4.74147		Prr11	10389606	-4.68669
Pih1d1	10552845	5.91284		Dmrt3	10462228	-5.55717		1700069B07Rik	10557109	3.97631		Scn3b	10584549	-3.62764		Ifitm5	10569011	4.73289		Lrrc32	10555174	-4.68027
Mtmr2	10583215	5.89067		Ubqln2	10602716	-5.55493		Aqp12	10348697	3.97582		Thra	10381006	-3.62547		Fbxo36	10347910	4.71614		Plaa	10514405	-4.66376
Rnaseh2b	10415791	5.88685		Lcn12	10480744	-5.54652		Golt1b	10542650	3.96159		Pam	10356968	-3.61859		Cib4	10529018	4.70305		Prokr2	10487937	-4.65611
Syt15	10414081	5.88505		3110079O15Rik	10348240	-5.5304		Sfrs16	10560551	3.93065		Mapk3	10557459	-3.60626		Insig1	10520362	4.69088		ENSMUSG00000073076	10544642	-4.65493
Phkb	10573637	5.88269		Gm606	10438784	-5.52998		Gtpbp5	10479324	3.92561		Tnf	10450501	-3.58425		Sbpl	10448399	4.6759		Bmpr1a	10418927	-4.60581
Eme1	10390050	5.87286		Ankrd57	10363346	-5.52614		Zfp68	10535034	3.92397		Acta2	10467124	-3.58363		Tceal3	10601874	4.65737		Csnk1g1	10586458	-4.60314
Acp6	10494551	5.84209		Fam59a	10457780	-5.5118		Lgals7	10551638	3.9206		Nsbp1	10606436	-3.58304		LOC675823	10589958	4.65582		Msr1	10578264	-4.59316
EG633640	10407387	5.83249		Pitpnc1	10392347	-5.51036		Fam46c	10500610	3.90314		Rnf17	10415472	-3.57135		Trib2	10399470	4.6523		ND1	10598029	-4.59248
Ect2	10497520	5.82804		Jakmip3	10558468	-5.51		Gch1	10419288	3.89933		Cstad	10471058	-3.56605		Tmem149	10551989	4.64677		Acpp	10596303	-4.5856
Pole2	10400649	5.82664		Pcmtd1	10344707	-5.50823		Avpi1	10467739	3.89409		Kcnip3	10487392	-3.56508		Lman1l	10593953	4.64268		Klrb1f	10542140	-4.56669
Rnu3a	10362674	5.80316		Dlk1	10398319	-5.50058		6330407A03Rik	10503107	3.8869		Mrgpra2	10563715	-3.56415		Aprt	10582390	4.63272		Wrn	10578071	-4.55674
Smpd4	10434067	5.7942		OTTMUSG00000016575	10490287	-5.49062		ENSMUSG00000060761	10593258	3.87933		Rps8	10565582	-3.5502		Pex10	10510982	4.61905		Abl2	10350823	-4.54337
Cxcr6	10590623	5.77382		Mill2	10550501	-5.48437		St6galnac3	10502890	3.84968		Fcgr3	10360040	-3.54427		ENSMUSG00000073800	10558450	4.60193		Enam	10522961	-4.54217
Yif1b	10551724	5.77344		Atp6v1e2	10453426	-5.47823		Nfasc	10357736	3.84588		Il25	10415127	-3.53435		EG435208	10368405	4.59257		EG666677	10408636	-4.53566
Polr2d	10454478	5.76058		Calu	10536818	-5.47433		Mfng	10430389	3.83152		Rtkn2	10363743	-3.53378		2810025M15Rik	10350848	4.59165		1700052N19Rik	10367626	-4.53304
3222402P14Rik	10596072	5.73731		Os9	10373036	-5.46885		Lemd2	10449327	3.82343		EG668089	10581640	-3.51657		Rtp3	10597273	4.59107		ENSMUSG00000068074	10440711	-4.49653
Xlr	10604656	5.73423		Magea4	10600065	-5.4676		Irx2	10406005	3.82087		Zbtb16	10593225	-3.49673		Six5	10550593	4.58866		Stk32c	10568792	-4.49613
Ppm1g	10529142	5.73009		BC017643	10394093	-5.44225		Ube2r2	10504047	3.80728		Efhc1	10345046	-3.49497		Xrcc3	10402721	4.58198		Egln3	10400304	-4.48203
Seh1l	10456423	5.72591		Tex19.2	10394075	-5.4337		A2ld1	10422512	3.80265		Ppap2b	10506488	-3.49106		Myoz2	10501895	4.58085		Tgds	10422259	-4.45147
Ift20	10379215	5.72458		OTTMUSG00000001474	10380208	-5.40528		OTTMUSG00000009925	10507471	3.78967		Clu	10416057	-3.48838		Homer2	10565156	4.57975		Trpm6	10461934	-4.45144
Plxdc2	10469457	5.72224		Lce1m	10499954	-5.39359		Kcnt1	10470214	3.7808		Slc41a1	10349711	-3.47712		Irx6	10573916	4.57712		Memo1	10452860	-4.43984
Sgpp2	10347734	5.70589		Tbc1d22a	10426065	-5.39168		Ptp4a3	10424607	3.77791		Armetl1	10468974	-3.47475		2410018L13Rik	10394833	4.56305		Dnajc14	10367413	-4.43841
LOC641050	10538892	5.69799		BC037703	10500710	-5.36982		Emcn	10496359	3.77419		Nop16	10409338	-3.45156		Cbln1	10580469	4.54785		EG381852	10550459	-4.43227
Polr3k	10479736	5.66484		Gm1968	10438891	-5.36882		Fam164a	10490802	3.77057		Mbip	10400460	-3.44893		Krtcap2	10493484	4.54617		4930430A15Rik	10485747	-4.41612
Rfc2	10526217	5.66325		Lsr	10562181	-5.36772		Slc25a16	10363563	3.76977		Pld1	10491106	-3.44812		Olfr1453	10466342	4.54381		Whsc1	10521136	-4.41516
Fam69b	10470298	5.65525		Kcnb1	10489872	-5.36374		St3gal4	10592084	3.76753		Gstm2	10501222	-3.44639		Hoxb9	10380622	4.53549		Nsmce2	10424363	-4.41334
Fam161a	10374578	5.65402		Lair1	10559486	-5.35448		Syngr4	10563436	3.76367		EG547447	10599958	-3.44561		Naif1	10471419	4.53315		B130016D09Rik	10559177	-4.4011
Eif2a	10492205	5.65178		Kncn	10507231	-5.34848		Gpr139	10567361	3.76218		Trem3	10445753	-3.4447		Unk	10382756	4.51759		Bbx	10439854	-4.40029
Pop1	10423629	5.64754		Lpin2	10446656	-5.34545		Mov10	10500911	3.75993		Hyou1	10584712	-3.43704		4930526D03Rik	10490745	4.51757		EG667802	10436200	-4.39971
Chad	10380398	5.6423		Mfsd4	10357660	-5.34182		Meis2	10486041	3.75857		Ncln	10371201	-3.43552		Gm705	10465963	4.51495		Taf4b	10454077	-4.3962
Srl	10437376	5.62803		Epas1	10447317	-5.33962		Bcl11b	10402554	3.75504		Ephb6	10537657	-3.43402		Tmem195	10395414	4.50434		Tank	10472289	-4.39618
Tsfm	10373009	5.59907		Slc6a6	10540122	-5.3391		Tmem47	10600597	3.74378		Lair1	10559486	-3.41862		Fbxl3	10422067	4.4906		Zbtb7a	10465740	-4.37804
Olfr453	10537791	5.59293		Fam108c	10565288	-5.30701		Sertad1	10551359	3.74208		AI427809	10512999	-3.39052		Gpr183	10422496	4.4858		Dlgap5	10419323	-4.37752
Agap2	10366825	5.5895		Setbp1	10459905	-5.30557		Dusp22	10404380	3.74054		BC026590	10505109	-3.39012		Impa2	10456383	4.48059		Gpatch1	10562439	-4.37723
Mc5r	10456513	5.57609		Zxdc	10540012	-5.30407		1700094D03Rik	10493626	3.73815		Pccb	10596053	-3.3781		BC003266	10508269	4.47726		Klk1b16	10552599	-4.36933
Irx4	10406017	5.56959		Samd12	10428594	-5.29464		Herpud1	10574087	3.73274		Rnmt	10456501	-3.36758		Gbx2	10356484	4.47027		Trpc1	10595753	-4.36551
Tax1bp3	10472440	5.56691		Acox2	10417544	-5.28649		Romo1	10495252	3.73048		Ccdc47	10392087	-3.36395		Fndc5	10508412	4.46944		D17H6S56E-5	10450374	-4.36142
Nov	10424119	5.56278		Slc22a7	10451291	-5.28589		Slc38a4	10431915	3.72233		Psmc6	10414288	-3.35424		Blcap	10489190	4.46569		EG545952	10562595	-4.34787
Slc35e1	10579724	5.54114		Ifna2	10514315	-5.27727		Olfr550	10555722	3.70987		2700029M09Rik	10571911	-3.34695		EG218444	10406622	4.44227		Mad2l1	10538832	-4.34385
Acyp2	10384936	5.52915		Stxbp2	10569848	-5.25439		Olfr12	10348643	3.70719		Sec23b	10476702	-3.34492		Ubl3	10535866	4.44106		Slc12a1	10475580	-4.33213
AI450353	10379652	5.51723		Olfr1433	10461711	-5.24308		Bbs1	10464858	3.70102		2810055F11Rik	10400896	-3.32915		Rspo3	10368495	4.43982		Stk32a	10455374	-4.32328
Epb4.1l3	10446553	5.50562		Slc4a5	10539393	-5.23936		Gbp4	10531987	3.68205		Spag5	10379127	-3.32789		Morn1	10510991	4.43862		Olfr944	10584488	-4.32122
Psen1	10397094	5.49924		Tdrd9	10398759	-5.2067		Tmem219	10568099	3.67797		Pstk	10558220	-3.32256		Gm3338	10405741	4.43529		Mastl	10480432	-4.31818
Cdk2	10373530	5.49702		EG435337	10401831	-5.20639		Ddx24	10402336	3.67643		Mtfr1	10490955	-3.32043		Npw	10448690	4.42941		Kif2a	10412011	-4.31768
Hscb	10532504	5.49228		9530008L14Rik	10408861	-5.1989		BC057170	10531980	3.67254		1110020C03Rik	10515803	-3.31598		Defa-ps1	10570683	4.42915		Rabif	10350039	-4.31418
Csf2rb	10425066	5.4904		Zfp462	10505073	-5.1988		Mpa2l	10531994	3.66121		EG546090	10580981	-3.31419		Smarcd3	10528664	4.42144		Clec1a	10548367	-4.30641
Cd37	10563178	5.48696		Rassf3	10372844	-5.18736		Pcsk1n	10598493	3.65989		Eif4g2	10566966	-3.31116		Begain	10402598	4.41382		Fam62b	10399061	-4.26513
8430406I07Rik	10476660	5.48376		Htatsf1	10599781	-5.18306		ENSMUSG00000074057	10554321	3.65877		Ncoa4	10413839	-3.30483		Adarb2	10403396	4.41005		Fcnb	10481262	-4.26271
C330018D20Rik	10458992	5.48301		Atp8a1	10530319	-5.17352		LOC100048095	10582006	3.65651		Nsun5	10526345	-3.30167		A630012P03Rik	10599598	4.40443		Opa1	10434888	-4.2575
Rps4y2	10567106	5.47957		Zadh2	10457054	-5.16845		ENSMUSG00000072643	10427877	3.6536		BC030867	10381548	-3.30111		Bax	10563303	4.37784		Tshb	10500748	-4.23028
Nfyc	10515974	5.47333		Paqr4	10448350	-5.16035		Ssbp2	10406551	3.65247		Bnip3	10568785	-3.30075		E130012A19Rik	10390454	4.37484		Spats2	10426689	-4.22777
Nucb2	10556583	5.43286		Ptprq	10372235	-5.15981		Mpl	10515755	3.65027		Glis3	10466888	-3.29757		Mdfi	10451604	4.37312		Blmh	10378802	-4.2084
Jup	10391103	5.42098		EG546337	10605507	-5.15653		Lsm4	10572449	3.64823		Plekha4	10552982	-3.29705		Ptprz1	10536667	4.36703		Rapgef6	10376163	-4.20757
Rgs7bp	10411949	5.41967		Tmem2	10462005	-5.15303		Engase	10383032	3.64711		Eif3g	10591357	-3.29329		1700001C19Rik	10451559	4.36321		Nusap1	10474984	-4.20411
Pla2g6	10430489	5.41941		Arl6ip1	10567219	-5.14022		ENSMUSG00000074383	10578249	3.64584		Rrn3	10433672	-3.28651		Olfr358	10482129	4.35879		Marchf8	10541049	-4.19684
Elp2	10454332	5.41653		Hk3	10409376	-5.13864		Arvcf	10434165	3.63862		Sipa1l1	10397002	-3.28555		Sebox	10379200	4.35793		Myst3	10570875	-4.19338
Tufm	10578984	5.40989		EG232801	10549635	-5.13768		Mast4	10411804	3.63639		Cyth4	10425092	-3.28185		Helt	10578547	4.35473		Ostn	10434860	-4.19063
Med23	10362210	5.40899		Arf2	10381744	-5.12848		2310039H08Rik	10445627	3.63029		Psmd14	10472300	-3.278		Crygn	10528686	4.33989		LOC674122	10601753	-4.18733
LOC432471	10363915	5.40748		Smad1	10579860	-5.11711		Ddx6	10584777	3.61095		Commd1	10384662	-3.27206		Trpa1	10353221	4.33479		Spnb4	10561266	-4.17367
Zfp637	10541094	5.40724		Mog	10450845	-5.11198		Heg1	10435271	3.61092		Sel1l2	10488124	-3.27104		Pde4c	10572466	4.31986		Ppp4r1l	10490169	-4.17094
Stx8	10377255	5.40531		U29423	10545229	-5.10886		Rnu2	10391488	3.60647		Pgk1	10601390	-3.26931		Pick1	10425267	4.31305		8430408G22Rik	10541071	-4.16965
6720416L17Rik	10483803	5.40493		Ctso	10492699	-5.10643		Hoxa9	10544788	3.60389		Clec4e	10547664	-3.24854		Spef1	10487858	4.31298		EG382871	10414173	-4.16304
Psmc2	10520025	5.39204		Slc14a1	10459866	-5.08863		Map1lc3b	10576056	3.60386		Xlr3b	10600122	-3.23022		Nme4	10449236	4.3117		Kpna2	10497503	-4.15169
Trp53rk	10478748	5.39131		Zfp353	10578387	-5.07115		Fxyd1	10562211	3.5919		Pnpt1	10374793	-3.22317		Mrgprg	10569539	4.3113		Aqr	10485989	-4.14548
Igf2bp2	10438603	5.38262		Rnf216	10535389	-5.04657		Akirin2	10503917	3.58267		Apool	10601473	-3.21918		Prdm5	10538811	4.30936		Chmp1b	10456378	-4.13487
Gdap2	10494735	5.36839		Eif1a	10455533	-5.04526		Zmynd8	10489723	3.57938		2610018G03Rik	10599581	-3.21701		Tmed6	10581518	4.30908		Serpinb1a	10408557	-4.12385
Gpatch3	10508892	5.34135		AW551984	10592420	-5.04469		Cdc7	10523802	3.5762		Gm106	10353252	-3.21002		Zfyve19	10474921	4.30723		D330038O06Rik	10579089	-4.12016
Pgk2	10450923	5.32937		Ip6k3	10449320	-5.04025		Tas2r119	10423518	3.57093		Zmat2	10455007	-3.20908		Sar1a	10363512	4.30432		Sgk2	10478326	-4.10912
Rft1	10413559	5.32634		Ripk4	10441270	-5.03826		Exoc3l2	10550706	3.56623		Psme3	10381345	-3.20667		Tmem191c	10433977	4.29392		Cdkl1	10400748	-4.1066
Ccdc103	10381653	5.31761		ENSMUSG00000063087	10457243	-5.03665		1190017O12Rik	10436951	3.56254		Mpp6	10538253	-3.19655		Ndufa13	10579119	4.2886		Lctl	10586140	-4.10491
Robld3	10499420	5.31623		Stxbp3b	10465853	-5.03235		Tgfb1	10551185	3.55821		Cfdp1	10581902	-3.19215		Syt3	10552656	4.28208		Rpgrip1l	10580550	-4.10396
Per2	10356601	5.3093		Chchd8	10555407	-5.03102		Ap2s1	10550326	3.55605		Wdr60	10403081	-3.19151		ENSMUSG00000055732	10404697	4.27407		Irgq	10550931	-4.10317
Klhdc8b	10596912	5.30842		Ly6d	10429520	-5.02762		Cacnb1	10390542	3.54693		Morf4l1	10595673	-3.18423		Mmp25	10448278	4.26871		Rabl4	10430289	-4.10206
Spsb4	10595848	5.29882		Lemd3	10372815	-5.0206		Mtap9	10492720	3.53931		1700071K01Rik	10389062	-3.17721		Cic	10551080	4.26596		Ubr7	10397895	-4.09746
Nedd9	10408850	5.28258		Tmem86b	10559606	-5.01316		Elmo3	10574694	3.53761		Fuca1	10509127	-3.17581		Polr2l	10569200	4.24782		Dnase2b	10502686	-4.08948
Otud6b	10511661	5.28174		Arg1	10368343	-5.00746		Zbtb20	10435789	3.52617		Snrpa1	10553993	-3.17282		5330431N19Rik	10463505	4.24055		Ubash3b	10592515	-4.08244
Rfc4	10438690	5.27954		Kcnq4	10515960	-5.00316		Ppp2r1b	10585249	3.52361		Usp31	10567591	-3.17199		Col25a1	10496036	4.24011		Kcnh6	10381994	-4.06809
Cpsf3l	10511207	5.27429		Styk1	10548573	-4.97714		Tmem39b	10516695	3.51815		Klhdc2	10396094	-3.16742		Tcfap2b	10345016	4.23713		Espl1	10427166	-4.06244
1700029J11Rik	10478994	5.27373		Tas2r115	10548665	-4.97574		Hddc3	10554463	3.51426		Ms4a6c	10461614	-3.1664		Olfr47	10537831	4.23513		Tmed3	10595664	-4.05941
Ppp5c	10560315	5.26973		1700023F06Rik	10391854	-4.96466		LOC100040305	10402262	3.51182		Rangap1	10430748	-3.1658		Trim69	10475420	4.23259		Eml4	10447141	-4.05595
Abcb8	10520154	5.2606		Lysmd4	10554076	-4.95869		Hbb-b1	10566258	3.50657		Kif11	10462796	-3.16438		Grina	10424781	4.22865		Hsp90ab1	10451110	-4.04806
Olfr1245	10484830	5.25779		Gclm	10495763	-4.95219		Dusp2	10475782	3.50388		Anxa2	10586744	-3.15823		B930095I24Rik	10416332	4.22527		Gng7	10371025	-4.04675
Wbp5	10601854	5.25338		EG435528	10450951	-4.94031		Trim24	10537318	3.50303		Xpo1	10374590	-3.15759		Hdgfrp3	10565193	4.22471		Nuf2	10359890	-4.04476
Lrp12	10428353	5.23946		Zbtb20	10435789	-4.94011		Mett10d	10378482	3.50187		Ftsj3	10392098	-3.15718		Twist2	10348632	4.21583		Eif3c	10567941	-4.04087
Arfip2	10566502	5.22829		D230044M03Rik	10368021	-4.93452		Atp5d	10364696	3.50158		Dock9	10422436	-3.15387		Fam48a	10492049	4.21398		Rab11fip3	10449207	-4.03291
Tm7sf2	10465342	5.21709		Apcdd1	10456184	-4.92397		Neto1	10457091	3.49721		Mrps18c	10523541	-3.14309		Adck4	10551319	4.21389		Tmem126b	10565519	-4.02879
Wdr36	10454606	5.21098		Mylk3	10580349	-4.92294		Ankrd23	10353878	3.49719		Fndc3c1	10606333	-3.14185		Ccdc158	10531453	4.21226		4921530L21Rik	10416727	-4.01487
Farsb	10355931	5.19431		Evx1	10538310	-4.92124		C230094A16Rik	10384838	3.48242		Pcnx	10396956	-3.14141		Fkbp8	10572408	4.20596		A530099J19Rik	10407982	-4.01056
Trpc4ap	10488892	5.19309		Slco3a1	10564631	-4.91393		Actl6b	10526614	3.47664		Irx4	10406017	-3.13407		Zxdb	10600819	4.20499		Rrm1	10555695	-3.99911
Ppp2r1b	10585249	5.19169		Zfp606	10550003	-4.91334		Ptpre	10558410	3.47299		Spcs2	10565846	-3.13135		Ccdc121	10360741	4.19835		Bxdc1	10368730	-3.99415
Ppp1r14b	10528143	5.16924		Atf5	10562905	-4.91282		Olfr980	10592463	3.46069		Nmd3	10492598	-3.1258		Ccdc136	10536827	4.1928		1700084J12Rik	10428066	-3.99049
Polr3c	10500388	5.16778		Rrm2b	10428232	-4.91276		Cchcr1	10444858	3.45648		Sema4a	10499378	-3.11498		Tmem85	10485830	4.19148		Pilrb2	10534940	-3.98867
Aim1	10368947	5.16743		Vmn2r120	10452376	-4.90875		Yy1	10398288	3.4563		Smc2	10504957	-3.11075		Magea2	10607443	4.18872		Ngf	10494817	-3.98534
Snora41	10346876	5.1672		Ide	10467230	-4.90136		Cd2ap	10451004	3.4499		Bmpr1a	10418927	-3.09532		Hoxc6	10427293	4.18306		Runx3	10509030	-3.98354
2510006D16Rik	10508468	5.16594		BC107364	10500347	-4.89625		Arntl	10556463	3.44938		Usp36	10393509	-3.09133		Fgf14	10422585	4.18256		Cdc14a	10501629	-3.97996
Mrpl35	10545339	5.16226		Nlrp9a	10551252	-4.89615		AI451617	10566366	3.44621		Epx	10389654	-3.09022		V1rd22	10550818	4.18201		Lias	10522134	-3.97553
Pola2	10465282	5.15869		Gnai3	10501265	-4.89267		Lce1a1	10499911	3.444		OTTMUSG00000012426	10472040	-3.08363		Sik1	10449741	4.17848		Melk	10504470	-3.96647
Usp10	10575961	5.14758		Ogfod1	10573998	-4.89165		Pou4f3	10455335	3.44384		Prmt6	10501485	-3.08271		Elof1	10591735	4.17748		Arfip1	10499080	-3.95662
Gpsm2	10501402	5.1443		Elk1	10603870	-4.89148		Syt16	10396454	3.43477		Zfp654	10440288	-3.07946		Ankrd33	10426991	4.17472		Olfr1110	10484662	-3.95637
Ilk	10556005	5.13887		Cd7	10394054	-4.89093		2900092E17Rik	10568131	3.43259		D930020E02Rik	10421180	-3.07893		OTTMUSG00000015750	10476935	4.17043		EG278167	10605662	-3.95183
Arrdc3	10406407	5.13676		Adra1a	10416099	-4.8773		Myo5c	10587150	3.43215		Esco2	10420877	-3.07613		Lbx1	10468046	4.16809		4930442H23Rik	10371080	-3.95132
Pdlim5	10502469	5.13184		Foxa2	10488374	-4.87514		Rab5a	10445898	3.42814		Gm9558	10575473	-3.06935		Vsig8	10351843	4.1677		Mapkap1	10471571	-3.94115
Stk16	10347552	5.1174		Col8a2	10508142	-4.86863		1700022I11Rik	10504230	3.42667		Cap1	10516051	-3.06781		Gk2	10531556	4.16626		1110001A07Rik	10379989	-3.9407
Casp2	10537728	5.11415		Gstt3	10369993	-4.85822		Abpa	10552121	3.4264		Mlkl	10581813	-3.06672		4930579J09Rik	10465965	4.15917		Pbx3	10481857	-3.93282
Smcp	10499906	5.10675		Kctd9	10416155	-4.84497		EG664886	10514374	3.41626		Frk	10362499	-3.06513		Vstm2b	10552288	4.15887		Gm904	10405149	-3.93192
Nat6	10588696	5.10176		Mcfd2	10453436	-4.8353		Med12	10601099	3.41624		Dio2	10401841	-3.06072		Tmprss11a	10530974	4.15878		Apoc1	10560618	-3.93075
St6galnac3	10502890	5.09425		AY761185	10570641	-4.83524		Abcb4	10519578	3.40108		Hectd3	10507394	-3.05288		Prl2c1	10404330	4.15325		Apbb1ip	10469695	-3.93072
Psat1	10466410	5.09382		Aldh1a1	10461979	-4.83464		Snx21	10478580	3.40044		Hspa4l	10491780	-3.0465		Agps	10473024	4.148		Rbp3	10414034	-3.92446
Oxnad1	10413826	5.08979		E130203B14Rik	10413932	-4.83329		EG383229	10449280	3.39862		2610101N10Rik	10595723	-3.04577		Nos1ap	10359970	4.1464		Vrk2	10384782	-3.91433
Tnfsf9	10446229	5.07239		Olfr464	10389672	-4.82962		Slc25a39	10391669	3.39605		Rad9	10464659	-3.04175		Fbxw2	10481909	4.14084		EG668492	10394680	-3.9113
Robo4	10584288	5.06946		Golga7b	10463242	-4.81168		Rai14	10427744	3.39412		Mapkap1	10471571	-3.03352		Ndufa2	10458386	4.13346		Olfr1283	10474490	-3.90828
Cdk2ap1	10533807	5.06414		Ppp1r7	10348775	-4.81141		Slc2a3	10547641	3.39206		Tmem208	10574718	-3.03284		C2	10450344	4.13002		Prokr1	10546024	-3.90459
Mrpl13	10428690	5.06248		IghmAC38.205.12	10403018	-4.80952		Hs6st1	10345442	3.37845		Nucb2	10556583	-3.03067		EG668158	10402572	4.12941		Fcrls	10499189	-3.90438
AU014645	10504703	5.06141		Siah1b	10607747	-4.80621		Atp6v1f	10536895	3.37146		Nucks1	10349733	-3.03055		Itga9	10590031	4.12664		Gpld1	10404218	-3.90346
Pard6g	10456988	5.05827		Tnfrsf26	10569485	-4.79915		Zmynd15	10377826	3.36676		Slu7	10375290	-3.02736		Crocc	10517842	4.12418		Tmem123	10583145	-3.89841
Hsd17b11	10531919	5.05788		Gm6268	10537558	-4.79694		Acyp2	10384936	3.35802		LOC676160	10603005	-3.02675		Col24a1	10496656	4.1179		Slamf7	10360173	-3.89752
Brunol4	10457895	5.05426		Spred3	10561673	-4.7915		Plk2	10407126	3.35693		Zfp597	10437257	-3.02611		Opn4	10418971	4.11348		Ep300	10425527	-3.89673
2310005G13Rik	10440028	5.0519		2310002J15Rik	10480649	-4.78616		1700110M21Rik	10422026	3.35099		4921508D12Rik	10476342	-3.01994		Rell2	10455199	4.11199		H2-M2	10450880	-3.89423
Spryd4	10373355	5.0443		Ccdc112	10458794	-4.77884		Phc1	10547597	3.34981		1700007K09Rik	10568512	-3.01456		Hapln3	10564704	4.10646		Cx3cl1	10574220	-3.89021
Inpp5f	10558001	5.04101		Sfxn3	10463462	-4.77753		Nnt	10412394	3.34525		Tgm4	10590533	-3.01355		Olfr361	10482133	4.09577		Serpina3f	10398039	-3.88935
A930035D04Rik	10544499	5.03877		Gpr62	10596489	-4.77623		Cic	10551080	3.34465		ENSMUSG00000061438	10451547	-3.0056		BC048507	10405948	4.09186		Ankrd52	10367305	-3.88913
Hint1	10376196	5.03703		Ccdc78	10442870	-4.77613		Olfr1490	10461822	3.34246		Slc38a6	10396383	-3.00472		Map2k1	10594447	4.0901		1700006A11Rik	10501942	-3.88576
Ipp	10507286	5.03142		Kdm1	10517465	-4.772		Pigh	10401166	3.34169		Ebna1bp2	10507557	-2.99893		Defb7	10570627	4.08161		Mrps27	10406865	-3.88321
Txndc14	10484431	5.03103		Nr1d2	10417734	-4.76956		Rspo3	10368495	3.33891		Alcam	10439895	-2.99854		Fahd2a	10487382	4.07722		Sirt1	10369738	-3.88219
Ltb	10444752	5.02317		Dfna5	10544648	-4.76918		0610010K14Rik	10387807	3.33269		1110034B05Rik	10354792	-2.99251		Ddx26b	10599696	4.07437		Aldh3a2	10386652	-3.88124
Cyth2	10563390	5.02161		Doc2b	10388465	-4.76717		Ttc33	10422718	3.33253		Rnpep	10358038	-2.98515		1700029G01Rik	10516277	4.05924		Tpcn1	10533145	-3.87495
1700021C14Rik	10499342	5.01839		ENSMUSG00000051848	10437695	-4.76356		Ceacam20	10550740	3.33028		Tbc1d24	10448459	-2.98494		Gatsl3	10373902	4.0488		5730590G19Rik	10554325	-3.86629
BB014433	10577237	5.00074		Pax7	10517715	-4.76046		Ankrd37	10578515	3.3165		Aggf1	10411199	-2.98483		Fam38b2	10459363	4.0469		Hmmr	10385248	-3.8652
ENSMUSG00000072655	10549544	5.00034		Olfr1352	10364424	-4.76045		ENSMUSG00000076563	10545212	3.31401		D630042F21Rik	10542192	-2.96903		Extl1	10517250	4.04457		Scp2	10514956	-3.84833
Ada	10489391	4.99301		4932414J04Rik	10384595	-4.74735		AI597479	10345904	3.30974		Slc41a2	10371321	-2.96527		Mark1	10360863	4.03129		Has3	10575095	-3.84649
Gtf2f2	10421661	4.98978		R3hdm2	10366909	-4.74528		Snap47	10386388	3.30861		BC003266	10508269	-2.96015		Hcrt	10391273	4.03114		D730039F16Rik	10471599	-3.84357
9030619P08Rik	10429588	4.98547		Pusl1	10519224	-4.74231		Fam149a	10578477	3.30476		Eif2b3	10507418	-2.95976		Npvf	10544704	4.02749		Rrp1b	10443836	-3.83436
Gp5	10438907	4.98232		Tub	10556178	-4.74068		Nsun4	10515242	3.30393		Tlk1	10483563	-2.95081		EG664805	10456781	4.02718		Iqgap2	10411235	-3.83292
Plp1	10601888	4.97938		Gm757	10480646	-4.73978		AI894139	10537938	3.29346		Adam23	10346882	-2.94915		Mdk	10485070	4.02665		Gm355	10475879	-3.83038
Cpa6	10353102	4.97831		Entpd4	10416199	-4.73193		1700037C18Rik	10437263	3.2923		Dab2	10422728	-2.94783		Hnf1b	10379765	4.02524		EG665378	10356262	-3.82483
OTTMUSG00000006556	10512065	4.97142		4930556A20Rik	10451708	-4.72784		Onecut3	10364810	3.28977		Olfr920	10584458	-2.94134		Lrrc16a	10408280	4.02327		Xlr3c	10605007	-3.82119
Lgals1	10425161	4.96985		EG218997	10419390	-4.72675		Isoc2b	10559687	3.28883		Emr1	10446282	-2.93328		Aqp2	10426760	4.01808		Eltd1	10496872	-3.819
Psmb5	10419810	4.96745		Pramel5	10518192	-4.72261		Slc25a27	10451039	3.2792		Cry2	10485170	-2.93215		Sdc1	10394471	4.01435		Pde1c	10544941	-3.8186
Qtrt1	10583634	4.96245		ENSMUSG00000038461	10569222	-4.71191		Dennd3	10424584	3.27669		Gmip	10572212	-2.93054		Palm2	10505120	4.01287		A930018M24Rik	10419525	-3.81852
Cyp2a12	10551287	4.95996		Mllt6	10380793	-4.70209		Kdm5a	10541216	3.2676		Arhgdib	10548892	-2.93041		Rgs6	10397030	4.01212		Galk2	10475630	-3.81805
Eif3g	10591357	4.95953		OTTMUSG00000000169	10379260	-4.7008		4930553M12Rik	10514333	3.26723		Pram1	10444016	-2.92896		Cyp2j11	10514500	4.01145		EG382969	10427603	-3.81672
Cisd1	10369885	4.95883		Bzw1	10346523	-4.69653		Ppfia3	10563220	3.26462		Tmem144	10498871	-2.92063		Rps10	10494296	4.00926		Ms4a6c	10461614	-3.80409
Satb1	10451763	4.95773		Hdhd1a	10458884	-4.69358		Ctf1	10557738	3.26281		Micall2	10535103	-2.92013		Speer4d	10528191	3.99692		Phospho2	10472589	-3.79915
Nudt9	10523674	4.95759		Alcam	10439895	-4.68925		Lrtm1	10413492	3.26184		Vdac1	10375941	-2.91687		Mcf2l	10570236	3.99264		EG382722	10403394	-3.79877
Gmpr	10404885	4.95594		Oca2	10553743	-4.68869		Rab26	10448615	3.2618		Kcnab2	10518927	-2.91419		BC007180	10497012	3.99087		Bard1	10355329	-3.7983
Nhej1	10355711	4.94516		Clk3	10593988	-4.6863		Isl1	10412335	3.25952		5730508B09Rik	10502071	-2.91278		EG619780	10578153	3.98865		Mrgpra3	10563722	-3.7973
Chrnb2	10499643	4.93808		Neurod6	10544936	-4.6853		ENSMUSG00000059775	10581558	3.25412		Riok1	10404630	-2.91083		Nsfl1c	10521813	3.98038		ENSMUSG00000053640	10345877	-3.79374
Nrk	10601942	4.93275		Gsdma	10380976	-4.67614		BC028528	10500276	3.25218		Anp32e	10494322	-2.91039		Allc	10399739	3.97813		Anp32e	10494322	-3.7894
Mcm5	10572906	4.93163		Pde6c	10462887	-4.67401		Cad	10520650	3.25001		Rp2h	10598839	-2.90275		5730409K12Rik	10461051	3.97689		Xlr3a	10604996	-3.77903
Akr1c13	10403303	4.93153		BC002189	10490982	-4.6648		Mfsd6	10354506	3.24506		Sestd1	10484227	-2.89982		Sox8	10448967	3.97683		Xcr1	10597996	-3.77564
Akr1c12	10407445	4.9306		Luzp1	10517463	-4.66458		Cd200	10439651	3.24185		Cald1	10537184	-2.88852		Trappc6a	10550715	3.97654		A530098C11Rik	10354267	-3.77475
Agap1	10348432	4.92852		Tmem224	10559644	-4.66205		Pank4	10510957	3.23606		Myh11	10437885	-2.88767		Zc3h7b	10425578	3.96833		2610002M06Rik	10606376	-3.76973
LOC100046692	10432558	4.92042		Slc47a1	10386683	-4.65956		Ngrn	10554413	3.23534		Lbr	10360745	-2.88616		Ddah1	10496727	3.96816		Xlr3b	10600122	-3.76936
Ctla2a	10409876	4.91707		Tgfb1i1	10557960	-4.6548		Il17ra	10541246	3.23518		Qsox1	10359034	-2.88458		Marchf9	10373021	3.96752		Olfr1277	10485767	-3.76747
Slc25a5	10599215	4.90789		Tsc22d1	10416522	-4.64751		Tusc2	10588678	3.2331		Msi1	10524684	-2.88324		Sorcs3	10463875	3.96415		Zzz3	10496946	-3.76571
Tbc1d17	10562911	4.90746		E2f2	10509168	-4.64727		Mrps28	10497209	3.23287		4930522H14Rik	10515080	-2.88281		Aire	10370397	3.96395		9030617O03Rik	10397763	-3.76178
Tubgcp2	10568897	4.89589		Olfr1277	10485767	-4.64467		Hoxb8	10380629	3.23087		Frg1	10578377	-2.88039		Bcl7a	10525542	3.96302		Psmf1	10488575	-3.76027
Spata13	10415725	4.88969		Lrrc14	10425000	-4.64268		Pclo	10519770	3.22648		Tceal8	10606858	-2.87581		Thsd7a	10543145	3.95887		A830018L16Rik	10344879	-3.76018
C2cd2	10441313	4.88337		Dmkn	10552044	-4.63639		Pvalb	10430297	3.2225		Ston2	10401891	-2.87557		Tshr	10397606	3.95199		H2-Aa	10450154	-3.74688
Cog5	10395227	4.87769		Eml3	10461311	-4.63362		Ypel3	10557481	3.22085		Usp1	10506118	-2.87056		Ccdc8	10550406	3.94524		Pkd1l2	10582025	-3.74658
P2ry10	10601416	4.87636		Rlim	10606195	-4.62851		Cxcl16	10387890	3.21102		Nudt12	10452404	-2.86936		Csta	10439282	3.92859		EG665373	10577065	-3.73641
Gosr2	10391949	4.87283		A330021E22Rik	10527982	-4.62692		Tead2	10552874	3.20782		Zswim5	10507379	-2.8688		Rps14	10498155	3.92727		Smc5	10466682	-3.73373
Exosc5	10551173	4.86473		Dysfip1	10393818	-4.62118		Zgpat	10479596	3.20153		Ppm1m	10596442	-2.86876		Defb18	10353333	3.92649		Asb7	10564448	-3.73282
Nans	10504743	4.85778		Olfr228	10484608	-4.61328		Ang3	10414260	3.20107		Ces8	10574617	-2.86866		4930412O13Rik	10469138	3.92585		Vmn2r15	10532285	-3.73226
Sirt5	10404815	4.85567		Btbd2	10370920	-4.60939		Gm3315	10581031	3.19921		1700012A03Rik	10537098	-2.86766		EG624121	10559243	3.92399		Lamp2	10604187	-3.71833
Zbtb24	10362758	4.85382		Defa5	10570693	-4.59872		Smcr7	10376715	3.19694		Aldh1a1	10461979	-2.86721		Brunol4	10457895	3.92034		Spdya	10446679	-3.71627
Flna	10605256	4.85366		Atg12	10458834	-4.59388		1110013L07Rik	10493421	3.19001		Wdr70	10427521	-2.86517		ORF19	10446427	3.91876		Tubb5	10450605	-3.71247
Neil1	10593887	4.8525		Sema5b	10435415	-4.59302		Tm7sf4	10423894	3.18712		C3	10452316	-2.86395		Gm3315	10581031	3.90585		Ddi1	10590686	-3.7035
Psmb7	10482229	4.84923		Ush2a	10352586	-4.58602		Ebpl	10420631	3.18286		Edem1	10540493	-2.86376		Defa3	10570729	3.90423		Nip7	10575144	-3.69398
Mcm4	10437945	4.84367		EG625716	10549012	-4.58515		Rnu2	10603736	3.18272		Abca8b	10392484	-2.85823		Moxd2	10544286	3.90281		Matn2	10423599	-3.69362
Zfp410	10397201	4.84349		Usp2	10584634	-4.58462		Per1	10377439	3.17934		Sptlc2	10401781	-2.85742		Lhx9	10358272	3.90042		Cyfip1	10553598	-3.68697
Rhox3a	10599251	4.83857		Prtg	10586971	-4.58456		Snrpc	10443215	3.17481		Il8rb	10347291	-2.85559		Rnf186	10509596	3.89872		CYTB	10598069	-3.68576
Serpinb1a	10408557	4.83578		Nkpd1	10550723	-4.5842		F2rl2	10406736	3.17403		EG667141	10538781	-2.85526		6330512M04Rik	10569313	3.89584		Rlim	10606195	-3.68301
Ccdc43	10391755	4.83182		Gm2a	10376208	-4.58404		Krtcap3	10520753	3.16701		Ccdc84	10592856	-2.85237		ENSMUSG00000071362	10399661	3.89344		Slc5a2	10557975	-3.67292
Slbp	10529299	4.83126		Gpr183	10422496	-4.56812		Tssc4	10559270	3.16621		Ugt1a9	10348354	-2.84768		Pycrl	10429666	3.89176		Fam13a	10545045	-3.67088
1700048O20Rik	10590433	4.83045		EG665237	10351138	-4.56576		Tha1	10393436	3.16478		Olfr317	10386209	-2.83368		Chga	10397882	3.88473		Kif11	10462796	-3.66922
Kynu	10471912	4.82402		Defb34	10570587	-4.56451		Fam78a	10481574	3.16313		Dars	10357454	-2.83255		Tnfrsf25	10510668	3.88166		V1rh18	10408154	-3.66405
Lhcgr	10453487	4.82174		Tas2r107	10548606	-4.55857		Prkd2	10550365	3.16181		Acsl5	10464045	-2.82665		Cntn3	10546736	3.8811		Arl9	10522696	-3.6627
Rhoa	10588893	4.82009		D930048N14Rik	10375886	-4.55587		Dyrk1b	10551469	3.15933		C8g	10480751	-2.82353		Ppapdc1a	10558049	3.87766		Hnrnpm	10450006	-3.65979
B330016D10Rik	10510019	4.81249		Canx	10385599	-4.55341		Tmem66	10571302	3.1592		Krt222	10390780	-2.82305		Sprr3	10499896	3.87066		4930415F15Rik	10374327	-3.65969
Hdgfrp2	10446044	4.80943		Klhl5	10522075	-4.55306		Xaf1	10378068	3.14637		Sos2	10400718	-2.82096		Jmjd5	10557317	3.86732		Olfr550	10555722	-3.65619
Spag4	10477791	4.80115		Spnb5	10486327	-4.5516		Ceacam2	10561055	3.14463		BC061194	10469522	-2.81685		Olfr690	10566434	3.86418		Pelp1	10387871	-3.65537
Nfyb	10371307	4.78839		Fgr	10508772	-4.55081		Ube2d2	10498800	3.1439		Coq10b	10346298	-2.81563		Cd200	10439651	3.8585		4930444P10Rik	10353258	-3.64894
Tspan8	10366446	4.78625		Ampd1	10494873	-4.55005		Gale	10509147	3.14004		Ifitm7	10437846	-2.81423		Synpo2l	10417940	3.85625		Zcchc4	10521848	-3.64627
Olfr663	10555889	4.78284		Epha6	10440216	-4.55001		Igsf8	10351769	3.13788		Tmem49	10389507	-2.81318		Ccrk	10405822	3.85534		Lonp1	10452118	-3.64191
Cdca5	10460738	4.77932		Stat3	10391301	-4.55		Cdk5rap1	10488748	3.13731		Gtf2f1	10452213	-2.81066		Coro1a	10568024	3.84993		Syn2	10540880	-3.64182
Rad1	10423068	4.77403		Olfr772	10373620	-4.54833		Pfkl	10370376	3.13569		Nup188	10470973	-2.8095		OTTMUSG00000000720	10408585	3.84723		Bbs5	10472549	-3.64074
Igdcc4	10586306	4.76852		Gm1027	10514842	-4.54657		Tmem51	10518108	3.13495		Arl1	10365637	-2.80409		ENSMUSG00000074728	10490775	3.84712		Unc50	10345608	-3.63837
Spire1	10459552	4.76007		Ifna4	10505890	-4.54195		Rps5	10550052	3.12897		Thrb	10412882	-2.80016		Fam43b	10517614	3.83443		Trpv2	10376868	-3.62698
Snx6	10400336	4.75629		Kif5a	10373113	-4.53606		Boc	10439612	3.12892		Fndc1	10447649	-2.79736		Gpr81	10533725	3.83062		Plscr1	10587792	-3.62616
Prox2	10401586	4.75512		Klhl24	10434302	-4.52617		Add1	10521222	3.12221		LOC100134990	10384715	-2.79435		Nov	10424119	3.82632		2410091C18Rik	10447042	-3.62611
Fam5c	10350506	4.74797		Alg11	10570764	-4.52331		Vkorc1	10568328	3.11935		AA986860	10349562	-2.79407		1810013L24Rik	10433472	3.82368		Nf2	10383897	-3.62264
Cenpp	10409190	4.7453		OTTMUSG00000026089	10535369	-4.51807		Tmem54	10508405	3.11928		4930408F14Rik	10605353	-2.78467		Scx	10424905	3.82176		1700040L02Rik	10369806	-3.6223
Eif2b1	10533858	4.74043		Kctd17	10425082	-4.51692		Smap1	10353533	3.11576		Hmgn2	10591773	-2.78458		ENSMUSG00000052323	10418177	3.82077		Plscr2	10587799	-3.62227
Socs2	10394674	4.73688		2700045P11Rik	10433618	-4.50818		Znrf3	10383982	3.11562		Ankrd36	10374060	-2.78375		1700030K09Rik	10572804	3.82057		Depdc1a	10563883	-3.61724
Itgam	10557862	4.73681		1700029I15Rik	10474041	-4.50314		A330008L17Rik	10574423	3.10849		Mrgprx1	10563740	-2.78191		4933427G23Rik	10528519	3.81817		Cdca2	10421029	-3.61373
2700094K13Rik	10484425	4.72752		1700011F14Rik	10464287	-4.50257		Coro2b	10594301	3.10692		Csda	10548585	-2.77233		Arsi	10456018	3.81658		Zfp677	10442194	-3.61355
Cops4	10523529	4.72721		Itgb1	10582843	-4.49465		1500012F01Rik	10478847	3.10466		Ethe1	10550956	-2.77225		Tmem147	10562096	3.81574		Sulf2	10489759	-3.6097
Wdr75	10346074	4.72241		Olfr901	10584407	-4.49416		Id3	10509163	3.10097		Kcnrg	10415787	-2.77193		Use1	10572580	3.81277		Wipi1	10392449	-3.60935
EG623924	10345181	4.72111		Aox3	10346410	-4.48942		Tas1r2	10509811	3.09862		2310007F21Rik	10586130	-2.77172		Mtus1	10578324	3.8065		Slc7a11	10498024	-3.60844
Tcf19	10450519	4.71718		4933405L10Rik	10574872	-4.4868		Sf3a1	10373873	3.09567		Zmym4	10516435	-2.76916		Timp4	10547022	3.80562		Tmem68	10511311	-3.60777
1810009A15Rik	10461268	4.7028		2310021P13Rik	10413018	-4.48598		Pou2af1	10585276	3.09358		Aldh4a1	10509790	-2.76824		Arl6ip4	10525718	3.80274		Zfp639	10491354	-3.60714
Amigo3	10588849	4.69969		Tnfaip8l3	10593646	-4.48513		Inmt	10544932	3.08945		Bub1b	10474769	-2.76635		Rnase9	10419553	3.80203		Ccdc125	10406905	-3.59986
OTTMUSG00000015026	10414978	4.6958		Rnf43	10380116	-4.48313		Fam71a	10361089	3.08518		Stk11ip	10347672	-2.76491		Olfr664	10566384	3.80098		Eif4enif1	10373709	-3.59874
Tmem67	10511588	4.69375		EG667207	10498591	-4.47402		Csrnp1	10597758	3.07923		Gstm7	10501199	-2.76152		Crim1	10446986	3.79796		Ccnk	10398195	-3.59843
Exoc7	10393241	4.69327		1700030C10Rik	10399579	-4.4681		En1	10349345	3.0764		A530006G24Rik	10476882	-2.75926		1700128F08Rik	10583159	3.79661		Tmem120a	10534504	-3.59575
1700034F02Rik	10374895	4.6929		Fcho2	10411464	-4.46171		Slc39a9	10396896	3.07302		Rab1	10374466	-2.7566		Ccdc134	10425686	3.79419		Mboat7	10559436	-3.59206
Pde5a	10495794	4.68904		Olfr1283	10474490	-4.45477		Hoxa10	10544798	3.07287		Pxk	10412624	-2.75082		Prkx	10605465	3.79132		Rdh12	10396840	-3.59185
Ash2l	10577866	4.68802		Ly6e	10424676	-4.4538		Apba2	10553917	3.071		OTTMUSG00000006556	10512065	-2.75065		Gas8	10576373	3.79091		Zfp654	10440288	-3.59097
Efhc2	10603768	4.6871		1810064F22Rik	10591749	-4.45148		Gabarapl1	10542200	3.05946		Darc	10360344	-2.74908		Hrasls5	10461100	3.78932		Arhgap11a	10485963	-3.58987
Arrdc1	10480570	4.68191		Tmem130	10535577	-4.45128		Efna5	10452419	3.05829		Gstm1	10501229	-2.74482		Olfr1383	10375570	3.78725		Aspm	10350392	-3.5881
Prep	10362941	4.68114		2010106G01Rik	10487321	-4.45036		Thbs4	10411082	3.05388		Dpp8	10586284	-2.74259		Gfra4	10487787	3.78682		5033414K04Rik	10356172	-3.58744
Grik1	10440621	4.68094		Pabpc1l2b	10606158	-4.446		Robo4	10584288	3.04925		Abcf2	10528648	-2.73932		EG633640	10407387	3.784		Mrgpra2	10563715	-3.58141
Scg5	10485955	4.67352		Cyp8b1	10597875	-4.43607		Txndc5	10408741	3.04675		Wfdc6a	10489503	-2.73477		Sost	10391508	3.78182		Stat6	10366956	-3.57947
Olfr1130	10473555	4.67053		A630095E13Rik	10592196	-4.43517		Ssbp3	10506603	3.04651		Bcl6	10438738	-2.73104		Olfr1217	10484779	3.78175		LOC640991	10391424	-3.57929
Chrnd	10348150	4.66549		Stfa3	10439299	-4.43155		Mtvr2	10465209	3.04581		Mark3	10398695	-2.72972		Vmn2r12	10532277	3.78021		Plagl1	10361771	-3.57799
Tbc1d22b	10443535	4.65875		Rnf103	10539002	-4.42987		4930470P17Rik	10490094	3.04172		Prpf31	10549552	-2.72832		Mllt4	10441864	3.77645		Atp6v0d2	10511779	-3.57714
Bhlha15	10527323	4.6502		EG623186	10588075	-4.42087		F2rl3	10572861	3.04163		Olfr53	10558664	-2.72831		Gm1019	10499113	3.77604		Olfr670	10566409	-3.57631
E430025E21Rik	10428877	4.64569		Sv2a	10494372	-4.41934		Sdk2	10392739	3.03466		Usp47	10556350	-2.72509		Peli2	10414417	3.76784		Htatsf1	10599781	-3.57484
Sms	10607524	4.64349		Arf3	10432256	-4.41906		Hrasls5	10461100	3.03211		Prune	10500133	-2.72426		ENSMUSG00000066990	10514556	3.76576		Rfc3	10535979	-3.5737
Ppp1r13b	10402730	4.64128		Naglu	10381211	-4.41456		Itgbl1	10417212	3.03001		Zfp609	10594551	-2.72248		2810432D09Rik	10512288	3.76551		Eif1a	10455533	-3.56958
Hnrnpc	10419607	4.64048		Hipk2	10544114	-4.40906		Zfp36l2	10453272	3.02912		Rpl32-ps	10498651	-2.7208		Kank3	10444028	3.76491		Etv6	10542275	-3.56238
EG237412	10365225	4.6367		A530032D15Rik	10356271	-4.40872		Bcl7a	10525542	3.02782		Nudc	10578019	-2.72068		Ccdc120	10603362	3.76408		Zfx	10605729	-3.56137
EG330948 // EG330948	10585697	4.63366		Ccdc55	10388613	-4.40785		Amigo3	10588849	3.02375		Lce1f	10499927	-2.72021		LOC675046	10344950	3.76385		Fam65a	10574789	-3.5581
Narfl	10442857	4.62635		Med12l	10492231	-4.40021		RP23-34B24.1	10512892	3.02157		Ifnz	10505858	-2.71728		Mpzl2	10584827	3.76152		Hexb	10411373	-3.551
Snip1	10508036	4.62548		Abi1	10480423	-4.3979		Sdc3	10508651	3.01801		Ccdc59	10366186	-2.71708		Mtss1	10428857	3.76031		Olfr1466	10461800	-3.54863
Ctdp1	10459930	4.62322		Wbp2nl	10425741	-4.39756		9130011E15Rik	10468131	3.01756		Dtna	10454254	-2.716		Tsc22d2	10492195	3.75505		Wdr51b	10366026	-3.54801
Atp5h	10542520	4.61867		Eral1	10388734	-4.38218		Tnfrsf25	10510668	3.0141		3830417A13Rik	10599866	-2.71533		1700094C09Rik	10570191	3.74653		Havcr2	10375443	-3.54786
Fam149b	10412960	4.61169		4930455F23Rik	10351269	-4.38147		Ddx59	10350286	3.01369		9030617O03Rik	10397763	-2.71533		Krtdap	10552064	3.74579		Olfr341	10482117	-3.54284
Impa2	10456383	4.60598		Cldn23	10578203	-4.38095		Dnahc2	10387397	3.01364		Bag1	10512136	-2.71449		Exoc3l	10581197	3.7416		Clint1	10375382	-3.54054
B230118H07Rik	10485361	4.60363		Cdc37l1	10462333	-4.37981		Gm459	10545182	3.01017		Tspyl2	10607346	-2.70993		Tsc2	10448631	3.74003		Rasgrp1	10486061	-3.5401
Galr1	10460010	4.60164		Asph	10511446	-4.37754		Med26	10579731	3.00953		Prkab1	10533026	-2.70711		9930038B18Rik	10399376	3.73606		Siah1b	10607747	-3.53837
Mlf2	10541741	4.58968		A930013B10Rik	10380275	-4.3766		Mcoln3	10496756	3.0068		Hras1	10569071	-2.70659		Trmt1	10573401	3.73557		Hus1	10384322	-3.53632
EG620161	10540542	4.58913		ENSMUSG00000074318	10501181	-4.37567		Dusp10	10352448	3.00442		Hnf1b	10379765	-2.70577		Lsmd1	10377541	3.73471		1810009O10Rik	10388898	-3.53163
Nes	10493114	4.58832		Gdf7	10399357	-4.3748		Ttll10	10519241	3.00108		Zkscan5	10527465	-2.7038		Snai3	10582322	3.73223		Ampd3	10556302	-3.53136
0610011F06Rik	10442914	4.57729		Trim2	10499045	-4.37269		BC027072	10452729	2.99942		Dbndd1	10582551	-2.7037		Tmco4	10509601	3.72244		Mmgt1	10604687	-3.52836
Tmem147	10562096	4.57422		Rrbp1	10488195	-4.37188		Refbp2	10360147	2.99799		Lin37	10561994	-2.7004		B230396O12Rik	10510914	3.71938		Olfr1037	10484555	-3.52681
Dna2	10363575	4.57288		Cdk6	10519324	-4.37145		Ring1	10450089	2.99605		4930579G18Rik	10415092	-2.69702		H2-Ke6	10450103	3.71515		Tmem71	10429114	-3.52542
Clptm1	10560592	4.57251		Pfn1	10387932	-4.36622		Mex3a	10493245	2.99592		Ctsa	10478594	-2.69663		Irf5	10536898	3.71495		Mier3	10407145	-3.52535
Uck2	10359851	4.57192		A830019P07Rik	10467175	-4.36497		AI450353	10379652	2.99123		Fam128b	10437963	-2.69576		Nnt	10412394	3.71314		Casc5	10474875	-3.52421
Fkbp14	10544885	4.56969		1600014C10Rik	10552252	-4.36234		Rsrc2	10533703	2.98868		Cd53	10501063	-2.69435		Ccdc146	10528289	3.71036		Cstad	10471058	-3.52119
Dtnb	10394186	4.56736		Lrba	10492890	-4.36204		Bcl3	10560685	2.98774		Dclre1c	10468949	-2.69013		H2-T24	10450675	3.70813		3110082J24Rik	10528925	-3.51467
Magmas	10437392	4.55839		Pamr1	10474129	-4.35746		Olfr979	10592461	2.98272		Krr1	10366350	-2.68817		Orm1	10505438	3.70272		Abcg5	10453318	-3.50377
Tyrobp	10551883	4.55801		Ccdc108	10355670	-4.35481		Uts2	10510594	2.98226		Mterfd2	10356771	-2.68707		EG625046	10466314	3.70105		Slc25a24	10495405	-3.50223
Stox1	10369655	4.55589		Mag	10562152	-4.35305		Smarcd1	10426798	2.98161		Fbxo32	10428796	-2.68481		Pkd2	10523727	3.69972		Tigit	10439527	-3.50104
Pms2	10527268	4.55121		Daam2	10451679	-4.34211		Rpl10a	10443360	2.98112		Polq	10435581	-2.68197		Speer6-ps1	10403248	3.69929		E2f8	10563780	-3.49792
Rabl5	10526502	4.54812		Clec2l	10537406	-4.3399		Cd300lg	10381514	2.98071		Got1	10467842	-2.67913		EG622962	10548684	3.69849		Slc7a6	10574985	-3.49723
Gm885	10382106	4.54329		Rsbn1l	10528257	-4.33905		Gprc5b	10567355	2.97956		Tpi1	10547830	-2.67789		EG668123	10412060	3.6978		Dio1	10514912	-3.4971
Ptk7	10451372	4.54197		Gigyf2	10348201	-4.33829		Fermt3	10465587	2.97951		Timm8a1	10606689	-2.67778		Myg1	10427205	3.69442		S1pr3	10405179	-3.49439
Pex7	10368162	4.54078		Tbkbp1	10390336	-4.33657		Galnt12	10504763	2.97854		Dcun1d5	10583034	-2.67531		Srpx2	10601659	3.68987		Hectd3	10507394	-3.49257
Camk2a	10456021	4.53927		Zbtb8b	10516596	-4.33647		Six3os1	10453390	2.97536		Mysm1	10514441	-2.67488		Akap13	10554166	3.68717		Lypd5	10550870	-3.49106
Tal2	10505059	4.53827		2610109H07Rik	10518464	-4.33552		Tmem8	10442932	2.97499		Pkm2	10585932	-2.67363		Bcas1	10490061	3.68649		Smc2	10504957	-3.48928
Rpn2	10477946	4.53454		Txnrd1	10365260	-4.33372		Anks3	10437454	2.97367		Capza2	10536527	-2.67072		Pnck	10605067	3.68347		Pnpla5	10431124	-3.48399
Ydjc	10433963	4.53127		Runx1t1	10503382	-4.33055		LOC675823	10589958	2.97236		Dolk	10481453	-2.66956		Emilin3	10489261	3.68222		4930579K19Rik	10595895	-3.48208
Tatdn1	10428842	4.53108		Zfp280b	10364130	-4.32866		Agap2	10366825	2.97232		Xab2	10576728	-2.66911		Olfr1180	10484741	3.68167		EG665631	10522944	-3.48029
Map4k2	10460891	4.53104		Scaf1	10563037	-4.3283		Btf3	10411448	2.97215		Invs	10504865	-2.66522		Dnajc27	10394245	3.6801		Zfp131	10412421	-3.47906
Isyna1	10572432	4.52814		D930020E02Rik	10421180	-4.32687		Gpr113	10528951	2.97089		Mnat1	10396372	-2.66156		Muc1	10493474	3.67913		Aytl1b	10523853	-3.47307
Ube2t	10350090	4.52676		Trp53	10377550	-4.32345		Col4a2	10570068	2.96889		Csgalnact2	10547217	-2.66043		Plekha3	10473097	3.67895		Gtse1	10426016	-3.47249
Pard6a	10574866	4.52497		Olfr893	10584382	-4.32099		Pvt1	10424404	2.96615		Supt6h	10388786	-2.6602		Zbtb46	10490682	3.67789		4930470H14Rik	10447546	-3.46702
C1qa	10517517	4.51844		Hnrnph2	10601760	-4.32046		Olfr623	10566233	2.96426		Usp46	10530641	-2.65997		ENSMUSG00000073146	10604895	3.67783		Clspn	10508151	-3.46356
Olfr1465	10466355	4.51757		Nrl	10420013	-4.31615		2310061N02Rik	10440664	2.96337		2900064A13Rik	10474588	-2.6599		1700018L24Rik	10570168	3.67718		Slit3	10375175	-3.46274
1700086L19Rik	10396466	4.51684		Pou2af1	10585276	-4.31291		EG545306	10353305	2.96071		Agps	10473024	-2.65944		Mpl	10515755	3.67235		Kbtbd4	10473754	-3.46207
Skiv2l2	10412177	4.5167		ENSMUSG00000063611	10470562	-4.31255		Dok2	10416334	2.95722		Ubtf	10391625	-2.6577		Tjp2	10466745	3.67159		Cnot4	10543904	-3.46135
Thyn1	10583942	4.51194		1700021F07Rik	10479058	-4.31056		Cryga	10355202	2.95634		Slk	10463803	-2.65759		Flrt1	10465619	3.67103		Cdc2a	10369815	-3.46098
Kank1	10462195	4.51078		Krtap4-2	10390923	-4.30809		Mkrn2	10540923	2.95461		G3bp2	10531323	-2.65409		ORF63	10436727	3.66498		Srr	10388377	-3.46055
Lsp1	10559207	4.50741		Plxnb1	10589368	-4.30296		Noxo1	10442565	2.95419		Pbx2	10444394	-2.65347		Tm7sf2	10465342	3.66478		Zfp58	10410332	-3.45921
Nt5dc2	10413710	4.50739		Smc1a	10602599	-4.29258		Egfr	10374366	2.95138		2310042E22Rik	10438567	-2.65031		Olfr763	10367473	3.66442		Tmem79	10499348	-3.45785
Wdr5b	10435487	4.50595		Nrip1	10440406	-4.29208		Ppap2c	10370552	2.95104		Slc22a4	10385893	-2.64758		Epor	10591660	3.65148		D1Pas1	10352558	-3.45708
2410004B18Rik	10496742	4.50511		Chd3	10387316	-4.29178		Fitm1	10415279	2.95097		Tbcb	10561854	-2.64369		Es22	10580649	3.64916		Tmem184c	10579799	-3.45678
Capsl	10423024	4.50509		Rock2	10394699	-4.29078		Smarcad1	10538755	2.94875		Fbxl2	10597377	-2.64203		Mmp27	10583112	3.64887		Apoh	10382189	-3.45055
Btk	10606694	4.50318		Akap11	10421768	-4.28998		Nrarp	10469936	2.9478		Dnajc3	10417034	-2.64181		ENSMUSG00000074413	10584602	3.64782		EG435366	10409994	-3.44374
ENSMUSG00000072618	10428209	4.50222		Bfsp2	10596190	-4.28775		Ndufs7	10364744	2.94736		Mical1	10362767	-2.64158		Ttll6	10380599	3.64707		Mapk8ip2	10426244	-3.44362
Pter	10469312	4.50128		Msmp	10512594	-4.28665		Rpl18a	10579461	2.94688		Tbc1d8	10354168	-2.63728		2410015M20Rik	10452110	3.64463		Mlkl	10581813	-3.44296
Stxbp3a	10501420	4.50097		Kcnj11	10563480	-4.28547		Spocd1	10508492	2.94663		1110007A13Rik	10568417	-2.63344		Uts2	10510594	3.64222		OTTMUSG00000016364	10547054	-3.44233
Gimap1	10538138	4.50023		Tas2r121	10548663	-4.27922		Kdm4a	10515590	2.94598		Uso1	10523206	-2.62997		Bsx	10584584	3.64181		Trmt61b	10452721	-3.43247
Ppie	10516081	4.49413		Trat1	10439790	-4.27794		Cd81	10559261	2.94534		Ckap5	10473919	-2.62978		Gldc	10466976	3.63606		Vasn	10433274	-3.4275
Pabpc5	10601561	4.48999		Socs7	10380761	-4.27732		Gab1	10579925	2.94261		Snrpb2	10476620	-2.62797		Sqrdl	10475532	3.63001		4931431F19Rik	10566304	-3.42689
Kctd18	10354807	4.48989		ENSMUSG00000072614	10428366	-4.26907		Ppp2r2a	10421012	2.94078		LOC665268	10585823	-2.62781		Chchd7	10503109	3.62777		Them4	10494007	-3.42671
Phldb2	10439710	4.48888		Tcf4	10456522	-4.26789		9030624G23Rik	10399666	2.94003		Bcl2l15	10494972	-2.62644		Hdgfl1	10408367	3.62437		Syt10	10431625	-3.42662
Olfr1461	10461794	4.48431		Gm106	10353252	-4.26772		Rtp4	10434778	2.93942		BC030476	10423623	-2.62489		Gria1	10376245	3.62197		Tpx2	10477187	-3.42658
Abcb4	10519578	4.4843		Chst12	10527009	-4.26547		EG653016	10451142	2.93776		4930505H01Rik	10446341	-2.62212		Havcr1	10375463	3.62156		Olfr340	10471743	-3.42517
Nfkbie	10445412	4.48261		Epha8	10517521	-4.26297		Rps26	10373498	2.93698		Acsl4	10607089	-2.62155		Aldoa	10568050	3.61501		Prelid2	10458589	-3.42393
Mtnr1a	10571560	4.48236		Eps8	10548905	-4.26093		Ankrd6	10511901	2.93649		Snx4	10435226	-2.6208		Arglu1	10576924	3.61483		Fam178a	10463410	-3.42297
Rgs12	10521337	4.48135		Irak3	10372781	-4.26073		Scrib	10429699	2.93649		Elovl2	10408838	-2.61879		Dffa	10510452	3.61481		Ppp1r7	10348775	-3.41949
Vps37b	10533729	4.48104		Zfp654	10440288	-4.26064		Mbc2	10373407	2.92935		Lin7a	10366229	-2.6176		ENSMUSG00000060559	10571724	3.61356		Ctsg	10420261	-3.41824
Plac8	10531724	4.47587		ENSMUSG00000048936	10466970	-4.25936		Hyal2	10588683	2.92896		Fdxr	10392881	-2.61378		Speer3	10519738	3.60799		H60b	10362097	-3.41627
Usp19	10588975	4.46831		Gdf1	10572368	-4.25935		Gcap14	10418991	2.92893		Plcl2	10445867	-2.61301		Cep68	10384529	3.6073		Mettl7b	10373600	-3.41606
Rny1	10544523	4.46666		Scaper	10593799	-4.25877		Fam162a	10439276	2.9269		S1pr3	10405179	-2.60796		Sytl4	10606619	3.6042		Ppil1	10449575	-3.41123
1700104B16Rik	10578120	4.45859		Olfr734	10419452	-4.25565		Ctnnal1	10513061	2.92671		Ica1	10543120	-2.60653		Masp1	10438708	3.60389		Anp32b	10504730	-3.40752
Aco2	10425611	4.45834		Gper	10526952	-4.25082		Slc35d3	10368159	2.92299		Cdgap	10439483	-2.60404		Spp2	10348410	3.59913		E330037G11Rik	10577152	-3.4069
Polr1e	10504518	4.45767		Upf3b	10604078	-4.25059		Il17b	10456136	2.90567		Pigk	10496956	-2.6038		Scg5	10485955	3.59836		Olfr1307	10485798	-3.40644
Ddx24	10402336	4.45733		Sprr2a // Sprr2a	10493850	-4.24857		Tceal1	10601878	2.90448		Srl	10437376	-2.59755		Ppcdc	10593918	3.59813		Slc13a4	10543921	-3.40504
Prkx	10605465	4.45558		Pbx1	10359870	-4.24312		A430110N23Rik	10549733	2.90074		Tbc1d2b	10595680	-2.59724		Tceal6	10606789	3.59669		Zmym2	10415576	-3.40378
Mrps21	10500268	4.44244		Dbpht2	10396472	-4.24228		Picalm	10554839	2.89713		Tm6sf2	10572271	-2.59723		Dci	10442445	3.59619		A630095E13Rik	10592196	-3.40142
Tmsb10	10551009	4.4397		Slc6a11	10540822	-4.24172		Timm10	10473363	2.89456		Scp2	10514956	-2.59485		Optc	10357858	3.59552		Kif4	10601011	-3.40102
Ppil5	10396068	4.43832		2310039D24Rik	10580608	-4.24171		EG260347	10565587	2.89011		Eif2b1	10533858	-2.59169		1810043G02Rik	10364338	3.59445		Ccdc62	10525665	-3.40008
Adap1	10535065	4.43773		P2ry5	10416371	-4.23802		Hipk4	10551377	2.88608		4931440P22Rik	10498526	-2.5897		ENSMUSG00000073518	10457048	3.59292		Alg3	10438517	-3.39982
Zfpl1	10465366	4.43274		Atp1b2	10387505	-4.23582		Prdx4	10607475	2.88396		1110007L15Rik	10526923	-2.58776		Cldn4	10534395	3.58974		E030002O03Rik	10566315	-3.39958
LOC546994	10556932	4.43175		Olfr648	10566322	-4.23427		Klf10	10428302	2.88094		Alas1	10596454	-2.57783		Bspry	10505299	3.57377		Derl2	10388033	-3.38873
2310028O11Rik	10517682	4.43043		Spop	10380534	-4.23353		AY512938	10406456	2.87526		Ncf1	10534202	-2.57702		1810008A18Rik	10370320	3.57232		Gata3	10479981	-3.3884
Tomm20	10582814	4.42888		Gcm1	10587293	-4.23129		Crlf3	10388996	2.87261		Mrpl54	10371107	-2.57668		Fam110b	10503118	3.5709		Smu1	10512111	-3.38711
Nat5	10572932	4.42368		Stk32b	10529636	-4.22922		Crip1	10399005	2.87234		Aatf	10389269	-2.57651		Baiap3	10448878	3.56887		Olfr1099	10484640	-3.38399
Dnajc15	10421723	4.4208		Shisa2	10415693	-4.22843		Arl5a	10482687	2.87115		Plcxd3	10422628	-2.57516		Adcyap1	10447502	3.56747		AF362573	10355105	-3.38203
Nop10	10474541	4.41626		Agmat	10510025	-4.22728		Trfr2	10526630	2.86955		Ptprb	10366476	-2.57356		Sncaip	10455721	3.5628		Prkar2a	10589087	-3.38153
Olfr311 // Olfr311	10376418	4.41221		Mobkl1a	10523001	-4.22375		Ccdc85b	10465054	2.86821		Tyms-ps	10365572	-2.57204		2610028H24Rik	10364155	3.56202		St6galnac2	10393166	-3.38049
Sars	10501358	4.4118		Nek9	10401637	-4.2181		Hivep2	10361807	2.8679		5930416I19Rik	10548176	-2.5646		ENSMUSG00000038461	10569222	3.56029		Tbccd1	10438672	-3.37989
Pttg1ip	10364280	4.40743		Gm847	10590464	-4.21791		Tpm2	10512499	2.86651		Tyms	10528915	-2.56436		Ucn	10529077	3.55526		Lyzl1	10453609	-3.37573
Trim27	10403903	4.40491		Kcnj3	10472155	-4.21754		Bex4	10601850	2.86083		B3gnt9	10581175	-2.56188		Zfp454	10385647	3.5551		Ccdc57	10394018	-3.37385
ENSMUSG00000075319	10367828	4.40162		Nagpa	10437541	-4.21266		Cd27	10547985	2.86076		Tle4	10466374	-2.55808		Dnahc2	10387397	3.5548		Ddo	10362701	-3.37076
Gde1	10567335	4.40153		Tmem214	10520553	-4.21246		5730407I07Rik	10423568	2.86029		Ercc2	10550674	-2.55775		Hes6	10356593	3.55381		Brp16	10424853	-3.3706
4930431L04Rik	10578796	4.40115		Hmx2	10558242	-4.2108		Trim28	10550076	2.86014		Ruvbl2	10563275	-2.55565		Ndufs8	10464551	3.55352		BC017612	10583320	-3.36654
Anxa6	10385966	4.40089		Ccdc47	10392087	-4.20577		Zfp275	10600150	2.8596		Siglece	10562720	-2.55561		Scn8a	10426955	3.55225		Ereg	10523175	-3.36494
Scrn1	10544875	4.39852		Zfp36l3	10604653	-4.20548		Zfp46	10509218	2.85275		Fam57b	10557498	-2.55557		A230050P20Rik	10583485	3.55134		Taar6	10368279	-3.36439
Pctk3	10357676	4.39588		A430089I19Rik	10536136	-4.20444		Cluap1	10437270	2.85154		Ppt1	10507784	-2.54986		Gjb5	10516490	3.54781		Tnfsf9	10446229	-3.36417
Unc119b	10532937	4.39578		Zcchc9	10410975	-4.2043		Traf4	10388749	2.84987		Anxa5	10497817	-2.54834		U2af1l4	10551981	3.54736		Tmem97	10434668	-3.35852
Maoa	10598771	4.39175		A530013C23Rik	10478892	-4.20088		Hhat	10361169	2.84901		Hus1b	10408519	-2.54729		Wbp1	10545644	3.54323		Olfr1184	10473594	-3.35835
Lrrn3	10400126	4.39036		Polk	10411306	-4.19905		A4gnt	10588132	2.84901		ENSMUSG00000063087	10457243	-2.54681		Cd4	10547894	3.54257		Olfr710	10566615	-3.3564
Pmpcb	10520010	4.38609		Klk11	10552480	-4.19851		Vps37d	10534420	2.84802		Flt1	10535807	-2.54559		Rnu3a	10362674	3.54118		Olfr1459	10466351	-3.35601
Slc24a2	10514240	4.3858		Eftud1	10554629	-4.19579		Trim42	10595863	2.84734		Slit3	10375175	-2.54446		4931432M23Rik	10580897	3.54083		Adam24	10571432	-3.35427
Ntan1	10433691	4.38553		Stxbp5	10367775	-4.19423		1700065I17Rik	10455809	2.84464		1810012P15Rik	10379223	-2.53774		4930403N07Rik	10400904	3.53944		Olfr412	10378443	-3.35222
Lrrc66	10530627	4.38549		Defb5	10570612	-4.18884		Tead3	10449419	2.8443		Sned1	10348739	-2.53636		Klra5	10548450	3.53658		Gyk	10605571	-3.34932
Adrb2	10459288	4.38375		Rnf11	10515072	-4.18754		E2f4	10574682	2.84377		Tm4sf19	10435043	-2.53606		Hebp2	10368092	3.53428		Ndrg4	10574384	-3.34832
Prdx4	10607475	4.38291		Tmem178	10447120	-4.18647		6330416G13Rik	10505465	2.84034		Fxc1	10555953	-2.53599		OTTMUSG00000003802	10382927	3.53173		Olfr1419	10466272	-3.34481
Gm973	10346611	4.37914		B130016D09Rik	10559177	-4.18326		2310035K24Rik	10476270	2.83943		Tppp2	10414618	-2.53519		LOC672946	10426240	3.531		Ppap2a	10407211	-3.34295
Fam122b	10604620	4.37448		Gm725	10536440	-4.17414		Mmp11	10370037	2.83834		Cypt2	10601347	-2.5348		Klhl31	10587262	3.53065		Cdc5l	10451083	-3.34005
Sgk3	10344750	4.374		EG435977 // EG435977	10563725	-4.17363		Gba2	10512574	2.83006		Atp1a2	10360270	-2.53468		Slc3a2	10465772	3.52738		Cdc25c	10458195	-3.33979
Nup35	10567131	4.37206		Errfi1	10510574	-4.17171		Rbp1	10588037	2.82929		Ermp1	10466947	-2.53359		BC050254	10528482	3.52541		ENSMUSG00000064159	10594549	-3.3387
Sell	10351197	4.3686		Anapc10	10573048	-4.17083		Ccdc85a	10384797	2.8279		Psd4	10469828	-2.52975		Snx13	10395328	3.52067		Nfatc1	10459944	-3.33067
Snx3	10362823	4.36578		V1rd9	10550815	-4.1689		St8sia6	10480238	2.82562		Grxcr2	10458597	-2.52828		Olfr1385	10375565	3.51949		Cntn4	10540359	-3.33017
Zfp275	10600150	4.36404		4921517D22Rik	10409779	-4.16262		BB014433	10577237	2.8229		Rdh1	10367036	-2.52828		ENSMUSG00000074078	10554032	3.51836		Btbd1	10565178	-3.32626
Gjb3	10516484	4.3625		Itga6	10472820	-4.16218		Wdr76	10475362	2.8209		Cgnl1	10594855	-2.52558		Rnf149	10354191	3.51771		Npy6r	10455457	-3.32323
Ccng2	10523297	4.36222		V1ri9	10408134	-4.1578		Atxn7l2	10501286	2.81998		Htatsf1	10599781	-2.52482		Dclk2	10499138	3.51551		Zfp182	10603881	-3.31977
Psmd12	10382139	4.35999		Mc2r	10459611	-4.15652		Bglap-rs1	10499354	2.81618		Glra4	10606880	-2.52424		6430704M03Rik	10513103	3.5117		H2-Eb2	10444306	-3.31868
Gins4	10577623	4.35734		Tchh	10493984	-4.15086		Pcdhga12	10455148	2.81522		D10Ertd641e	10369295	-2.52216		Gtpbp5	10479324	3.51159		LOC629446	10367744	-3.31622
Zfp398	10537911	4.35191		Olfr139	10388298	-4.15007		Mpped2	10474361	2.81488		Ptgr1	10513320	-2.52192		Ppan	10583496	3.50968		Ccdc47	10392087	-3.31509
2810408M09Rik	10489719	4.35028		Fabp7	10363224	-4.14991		Pdhb	10417538	2.81441		LOC100047728	10551282	-2.51837		Trim34	10555862	3.50873		Lyg2	10354065	-3.31404
Olfr681	10555911	4.34464		Tax1bp1	10538318	-4.14943		Ankrd17	10531215	2.81295		Mrpl41	10561140	-2.51582		4921510H08Rik	10366000	3.50825		EG546482	10364383	-3.31362
Coro1a	10568024	4.34068		Rims1	10353479	-4.14871		Cdc37l1	10462333	2.81219		Lmcd1	10540523	-2.515		Olfr1408	10360334	3.5074		Nsdhl	10600082	-3.31342
Tm9sf4	10477264	4.34064		Olfr575	10566190	-4.14765		Smad9	10492091	2.81152		Slc26a4	10399854	-2.51432		Igsf2	10500656	3.50737		Gas2l3	10371770	-3.31215
Cops3	10386442	4.33988		Ascl4	10365469	-4.14655		BC066107	10449935	2.81121		Aspa	10388254	-2.50934		Ism2	10401774	3.505		Mapk13	10443408	-3.31202
Mrpl2	10445565	4.33876		Sbno1	10533812	-4.14588		Lst1	10450496	2.80999		Olfr589	10566201	-2.50627		Olfr205	10440180	3.50484		Ppat	10530806	-3.31133
4930579K19Rik	10595895	4.33368		A530054K11Rik	10410355	-4.14406		Zfpm1	10576090	2.80971		M6pr	10541484	-2.50617		Myoc	10351131	3.50396		Hsd11b1	10361234	-3.31064
Olfr492	10566688	4.32923		Baz1b	10526319	-4.14151		Gata5	10490491	2.80946		Ppwd1	10411915	-2.50615		Sall4	10490016	3.50057		Olfr507	10556156	-3.30493
Srm	10510391	4.32865		Tmod2	10595013	-4.14129		Casp3	10571696	2.80625		Ncam1	10593293	-2.50358		C79127	10560474	3.50043		EG546090	10580981	-3.30419
Mcm7	10534974	4.3282		B3gnt8	10551169	-4.13919		Rab39b	10605431	2.80441		Actr3	10357332	-2.50182		Msi2	10389680	3.48877		Glp1r	10443690	-3.29806
Anxa2	10586744	4.32446		Ccdc75	10447025	-4.13573		Cd99l2	10604932	2.80376		Efemp1	10374777	-2.49941		Dlec1	10590096	3.48775		Cd53	10501063	-3.29237
Gm340	10463155	4.31194		Chdh	10413517	-4.13229		Fndc4	10529206	2.80372		Parl	10468990	-2.49806		Immp2l	10395520	3.48654		Olfr463 // Olfr463	10389670	-3.29089
Fam105a	10427918	4.3119		Nrp2	10346843	-4.12511		Ldb3	10418950	2.80207		Snrnp27	10545932	-2.49208		Vamp3	10518805	3.47702		Sh3glb1	10502537	-3.28904
Ifna11	10505881	4.30993		Prcp	10554945	-4.12449		AA408296	10361200	2.80111		Tpcn1	10533145	-2.48986		Cisd2	10502329	3.46789		OTTMUSG00000011061	10510225	-3.28324
Msh3	10411019	4.30882		B630019K06Rik	10598562	-4.12299		Pde4c	10572466	2.7927		Zfp143	10556246	-2.48914		Khdrbs3	10424559	3.46779		Cnot6	10385557	-3.28254
Sdc1	10394471	4.30782		Cited2	10361828	-4.1224		4933434E20Rik	10493612	2.78489		Pknox2	10592251	-2.48821		Epo	10534832	3.46768		Lhfpl3	10520043	-3.28253
Pipox	10388718	4.30755		A930104D05Rik	10486096	-4.11154		Arhgap18	10362294	2.7845		Slc15a4	10533993	-2.48339		2410001C21Rik	10478983	3.46089		Olfr1506	10484875	-3.27943
Usp28	10585099	4.30632		Rae1	10479026	-4.10724		Slc38a2	10431894	2.7843		Klhdc10	10536996	-2.4828		Drap1	10465045	3.4575		AI452195	10407124	-3.27435
Eif1ay	10602795	4.30614		Fgf20	10578281	-4.10541		Cyp4f39	10443854	2.78096		Ppyr1	10418898	-2.48069		Krt32	10390985	3.45707		Uba2	10562331	-3.27247
Xrcc6bp1	10373000	4.30499		Bat2	10450451	-4.10009		Tigd3	10465260	2.77605		Tubgcp3	10577070	-2.4796		Fam73a	10502845	3.45402		Rdh14	10394555	-3.27085
Cript	10447349	4.3046		Mamdc4	10480775	-4.10003		OTTMUSG00000005773	10376459	2.77423		Vps53	10388492	-2.47933		Kcne1l	10607085	3.45398		Kpnb1	10390352	-3.26958
Zcwpw1	10526693	4.30394		ENSMUSG00000055048	10553769	-4.0987		2210018M11Rik	10565738	2.7737		Ankrd1	10467191	-2.47715		Cbln2	10457106	3.45311		ENSMUSG00000055790	10383351	-3.2684
Ap1m2	10591522	4.29866		EG665055	10522604	-4.09867		Dlec1	10590096	2.77048		Mpeg1	10461721	-2.47655		Aga	10571774	3.45294		Eny2	10423963	-3.26709
D10Wsu102e	10365297	4.29782		Rps6kb1	10389484	-4.09838		Ighvq52.3.8	10402991	2.76738		Fdxacb1	10585224	-2.47645		B4galnt4	10558773	3.45284		Lama5	10490384	-3.26295
EG268809	10424345	4.28922		Cdc42bpa	10352194	-4.09637		Serpina12	10402428	2.76254		Prss34	10442762	-2.4761		Paqr6	10493235	3.45217		Aldh1a1	10461979	-3.26242
Pde4b	10506335	4.28747		Abcf1	10450648	-4.09613		EG665386	10403868	2.76198		Snap29	10433996	-2.47535		Arl4c	10356475	3.45174		1700020D05Rik	10465103	-3.26004
Slc25a19	10392983	4.28544		Ppp1r3c	10467206	-4.09102		Dqx1	10539295	2.7615		Clp1	10484457	-2.47476		Klrc1	10548409	3.45015		Hnrnpa3	10600593	-3.25943
Ctla2b	10409866	4.28529		Mia2	10395925	-4.09099		ENSMUSG00000057802	10589698	2.76131		Psma3	10543783	-2.47426		1700054O19Rik	10418169	3.4491		6530401N04Rik	10400293	-3.25817
Fxyd2	10584891	4.28243		Fmn1	10474619	-4.09091		Arglu1	10576924	2.76069		Lonp1	10452118	-2.47425		Phc2	10508351	3.44123		Etf1	10458213	-3.2572
Wdfy1	10355974	4.28183		Apbb2	10530287	-4.09066		EG623356	10353522	2.7555		Ctps	10515943	-2.47392		Rnh1	10569057	3.43956		Daf2	10357480	-3.25586
Pars2	10506591	4.27211		Ifnab	10514317	-4.09016		ENSMUSG00000073129	10528615	2.75133		AI597468	10365420	-2.47313		Sgtb	10406941	3.43874		Emr1	10446282	-3.25534
Kcnj16	10382316	4.2689		Kcnc1	10553261	-4.08817		2610001J05Rik	10543226	2.74798		Cdca2	10421029	-2.47227		Olig2	10436823	3.43341		OTTMUSG00000005214	10374450	-3.25445
EG229330	10498391	4.26821		Tprg	10434808	-4.08793		Dexi	10437664	2.74735		Dis3l	10594460	-2.47041		Myl10	10526493	3.43298		Armcx4	10601768	-3.24997
Mrpl20	10511149	4.26753		OTTMUSG00000001062	10489346	-4.08137		Slc6a16	10552888	2.74413		Eif3a	10468828	-2.46695		2310028H24Rik	10512265	3.43241		Il2rg	10606016	-3.24783
Sgce	10542965	4.26627		Mpp6	10538253	-4.08022		Parp12	10544133	2.73877		2410091C18Rik	10447042	-2.46649		Mobkl2a	10370946	3.43237		Sepp1	10422598	-3.24732
Cyp2j11	10514500	4.26619		Ibsp	10523701	-4.08006		Pnrc1	10511935	2.73735		Hist1h4i	10408113	-2.46589		Vamp4	10351119	3.4255		Cyld	10573803	-3.241
Ercc6l	10606071	4.26289		Slc26a5	10528360	-4.08		ENSMUSG00000074742	10366407	2.73613		S100a8	10493831	-2.46257		Ylpm1	10397281	3.42307		2010321M09Rik	10586274	-3.23566
Fdps	10499483	4.25695		Tug1	10383758	-4.07703		Chrdl2	10555280	2.73529		Kif20a	10454709	-2.45989		Gpr161	10351298	3.42244		RP23-233B9.8	10515335	-3.23554
Il1rl2	10345777	4.25421		Gm1008	10489687	-4.0713		Atp5g2	10560816	2.7335		Zc3h7a	10437712	-2.45804		Bet3l	10362479	3.42177		Cacna1f	10598309	-3.22757
Tspan6	10606609	4.25126		Wdr33	10454483	-4.07016		9030612M13Rik	10449914	2.73341		Tas2r115	10548665	-2.4578		EG436008	10556998	3.41911		Ube2a	10599222	-3.22651
Dut	10475610	4.24898		Sh3d19	10492864	-4.06337		ENSMUSG00000062298	10363667	2.72913		LOC622659	10483761	-2.45683		Cacng4	10392369	3.41784		Btaf1	10462752	-3.22251
Rnase12	10419559	4.24707		1110057P08Rik	10436775	-4.06038		Txnip	10494428	2.72672		EG667510	10535954	-2.45067		Snora19	10468851	3.41763		Dab2	10422728	-3.21768
Ndufaf2	10412054	4.24701		Fkbpl	10444436	-4.05894		Olfr1387	10375561	2.72603		Lrfn3	10561911	-2.44933		Serpinf2	10388440	3.41748		Timeless	10367179	-3.21741
Uba2	10562331	4.24609		Nolc1	10463535	-4.05722		1700003F12Rik	10477551	2.72573		Fli1	10592067	-2.44745		BC015286	10574511	3.41687		Olfr301	10554721	-3.2174
2010007H12Rik	10526687	4.24584		Nudt15	10472195	-4.0564		Maff	10425283	2.72268		Mgst3	10359861	-2.44474		Gm52	10534301	3.41533		Olfr1302	10474516	-3.21656
BC003885	10587042	4.244		2810039B14Rik	10424705	-4.05229		Xpo7	10421456	2.72211		Dmxl2	10593671	-2.44415		ENSMUSG00000073103	10384768	3.41475		Olfr371	10573613	-3.21459
Sox12	10488623	4.23795		Olfr74	10484706	-4.04743		Klc3	10560491	2.71975		Crmp1	10521498	-2.44353		Nfx1	10504017	3.4138		Dhx57	10453114	-3.21144
Lyplal1	10360914	4.23598		Islr2	10594048	-4.04662		Zswim4	10580139	2.71879		OTTMUSG00000015732	10488456	-2.44245		Eif4e1b	10405334	3.41171		Sfrs2ip	10431856	-3.21017
EG666814	10346069	4.2322		Gipr	10560443	-4.03992		Dom3z	10444496	2.71594		Ddx49	10579219	-2.4355		Azi1	10393687	3.41158		Anpep	10564818	-3.20902
Uqcrc1	10589196	4.228		Eps8l2	10558880	-4.03914		Hand1	10386110	2.71521		Traf6	10474112	-2.42836		A930011G23Rik	10531627	3.409		4921517D22Rik	10409779	-3.20825
Zkscan5	10527465	4.22521		Grap	10376796	-4.0382		0610010E21Rik	10561907	2.71473		Serpinb5	10349108	-2.42743		OTTMUSG00000010333	10518169	3.40577		Nol4	10457820	-3.20793
Spc25	10483401	4.22456		Tcfap2d	10345007	-4.03776		Metrnl	10383615	2.71143		Hn1	10392943	-2.42689		Fkbp11	10432243	3.40383		Acat2	10447891	-3.20729
Hirip3	10557519	4.22399		2810474O19Rik	10542885	-4.03175		Cd48	10351658	2.70885		Gtf2b	10496621	-2.42498		Dcxr	10393926	3.40332		Tgtp	10385533	-3.2052
Mrps33	10563829	4.22242		Usp12	10535739	-4.03058		Epha8	10517521	2.70705		Tmem216	10465990	-2.42325		Ttll10	10519241	3.40041		Tgm4	10590533	-3.20443
Prmt1	10563014	4.21785		Gm98	10465916	-4.03058		Crk	10378732	2.70636		Arl8a	10350113	-2.42242		Spag16	10347163	3.39626		Tmem38a	10572815	-3.20335
Psmc4	10561356	4.21432		Pdap1	10535629	-4.03039		LOC545845	10538855	2.70475		Calml4	10586118	-2.4223		Best2	10580286	3.39545		Sel1l	10401900	-3.20332
Ccne2	10503264	4.21194		2310044G17Rik	10397476	-4.02985		Ivns1abp	10358675	2.7033		Chdh	10413517	-2.42143		ENSMUSG00000073476	10352794	3.39494		Fcer1a	10360338	-3.20194
Tpm2	10512499	4.21137		Tbc1d8	10354168	-4.02881		Ttc30a2	10483822	2.70088		Wdr40a	10512226	-2.42125		Zfp598	10442549	3.39119		Jak2	10462363	-3.19985
1110002B05Rik	10400321	4.20929		Tln1	10512514	-4.02865		1700020A23Rik	10476130	2.69954		Tbc1d13	10470936	-2.42098		Dusp5	10463945	3.39011		Ano10	10597883	-3.19968
Hdac8	10606088	4.20584		Kcnh1	10352798	-4.0276		EG621697	10361977	2.69765		Tspan2	10494821	-2.41985		Ddx25	10592140	3.38795		Olfr1198	10484758	-3.19939
Kcnab1	10492402	4.20435		Clint1	10375382	-4.02648		Ceacam18	10552451	2.69759		Sft2d1	10453562	-2.41871		Barx1	10404982	3.3839		Olfr598	10555785	-3.1984
Tek	10505954	4.19982		Trim63	10508953	-4.02595		Ndst1	10459089	2.69574		Kat5	10465114	-2.41777		Syngr4	10563436	3.37916		Fam19a4	10546557	-3.1976
Sftpc	10421387	4.19575		ENSMUSG00000074807	10487575	-4.0227		Otub2	10397966	2.68996		Gm1467	10575369	-2.41606		Ankrd34a	10494441	3.37658		Pigb	10594928	-3.19558
LOC677333	10450744	4.19543		Myh14	10562856	-4.02024		OTTMUSG00000003903	10382795	2.68406		Rufy1	10385616	-2.41271		Wdr1	10529689	3.37413		Tifa	10495967	-3.1942
Nsun5	10526345	4.19514		Gm608	10435832	-4.01906		Akap8l	10449854	2.68332		Degs2	10402575	-2.41252		Efcab4a	10558936	3.37235		Krtap13-1	10436746	-3.19244
4921520G13Rik	10535497	4.19329		Clec2h	10542112	-4.01828		ENSMUSG00000051848	10437695	2.67938		Rlbp1l2	10368598	-2.41036		BC004728	10432636	3.37057		Agxt2	10423053	-3.19023
2700078E11Rik	10468816	4.19212		Krtap9-3	10390909	-4.01636		Galntl4	10566993	2.67677		Sh2d1b2	10351473	-2.40697		Stag3	10526797	3.36908		Ehd1	10460833	-3.18998
Lrrc8d	10523772	4.1911		Gria4	10590663	-4.01534		Tceb2	10452890	2.67674		Thoc5	10373964	-2.40484		1700069B07Rik	10557109	3.36899		Taf15	10379689	-3.18663
Itga1	10412298	4.19064		Lgals9	10388902	-4.01397		9530077C05Rik	10583834	2.67608		Gtse1	10426016	-2.40374		H3f3a	10540507	3.36722		Ggps1	10407833	-3.18521
EG269718	10534583	4.19032		Steap3	10357249	-4.00955		9030619P08Rik	10429588	2.67505		Tbc1d4	10422028	-2.40232		Hey1	10497203	3.36645		Tect1	10533446	-3.17984
Klraq1	10447437	4.18673		Sval3	10537696	-4.00224		Hccs	10607933	2.67479		Clrn2	10521705	-2.40096		EG668506	10445891	3.36601		Ets1	10584142	-3.17402
Kcna6	10548051	4.18284		Per3	10518781	-3.99961		Adra1a	10416099	2.67462		Fbxw9	10573549	-2.39792		Rnase6	10414548	3.36457		Tmod3	10595000	-3.17287
Ndufb11	10603837	4.17945		Zfp264	10549886	-3.99909		Rpl36	10594946	2.67294		Nostrin	10472514	-2.39669		Ear2	10414262	3.3596		Prc1	10554445	-3.1719
1110020P15Rik	10383887	4.17904		1700037C18Rik	10437263	-3.99899		Tmem154	10492815	2.66625		Rps6ka2	10441565	-2.39654		Tmem106a	10381445	3.35871		Rp1	10352928	-3.16939
Cxcl2	10523156	4.17623		Mgat3	10425354	-3.99794		1700088E04Rik	10430447	2.66584		Map3k11	10460645	-2.39378		Tctn2	10525780	3.35842		2610039C10Rik	10440794	-3.16936
Psmd6	10417689	4.17609		Gabra2	10530406	-3.99782		Slc16a12	10467153	2.66556		Rnf8	10443550	-2.39315		EG240156	10446617	3.35559		Cox15	10467859	-3.16821
Slc25a32	10428328	4.17543		Nhlrc3	10498146	-3.99476		Rbm12b	10503363	2.66474		Gtpbp4	10407543	-2.39297		Rnu3b1	10380065	3.35528		Pth	10567034	-3.16699
Vars	10444605	4.1722		Cd79a	10551025	-3.99271		Fmnl1	10381708	2.66315		Atp9b	10459962	-2.39222		Prdx5	10465474	3.35379		Tbl1x	10600547	-3.16412
Cblc	10560672	4.17112		1700093J21Rik	10437171	-3.99155		OTTMUSG00000010662	10518364	2.66277		Pik3r6	10377286	-2.38913		Tas2r119	10423518	3.35203		Plscr3	10377612	-3.164
Sash3	10599487	4.16567		Shoc2	10464015	-3.98845		Crlf2	10532289	2.66249		Psmd7	10581560	-2.38866		Plxna2	10352867	3.35172		Zfp260	10551815	-3.15333
Znhit2	10460732	4.16264		Hsp90aa1	10490946	-3.988		Dlx1as	10483624	2.66145		Igsf21	10517731	-2.38485		Dnm3	10359480	3.35119		Rab22a	10479063	-3.15035
Vti1b	10401172	4.15835		Hoxb3	10380654	-3.98581		2010204K13Rik	10603316	2.66077		Bscl2	10461237	-2.38412		Ccdc28b	10516658	3.34963		Cep55	10462866	-3.14721
Galnt5	10472181	4.15817		V1rf5	10448180	-3.98341		Vip	10367582	2.65837		Fscb	10400564	-2.38394		Amdhd2	10448441	3.34827		Fbxo32	10428796	-3.14277
Vmn2r12	10532277	4.15733		4933413J09Rik	10413270	-3.97945		Tsc22d2	10492195	2.65771		Ocln	10411668	-2.38256		Treml4	10445758	3.34758		Dgkg	10438639	-3.13899
E330016A19Rik	10595171	4.156		Fam125a	10572637	-3.97892		Snai3	10582322	2.65683		Foxa2	10488374	-2.38172		Brms1	10460517	3.34751		Lig1	10550102	-3.13772
Cnr2	10509122	4.15581		Ccpg1	10587012	-3.97766		Mpdz	10514000	2.65642		Hebp1	10548761	-2.38063		Rdh16	10367045	3.34574		Ctcf	10574812	-3.13666
Limk1	10534324	4.15377		Olfr1200	10484762	-3.97556		C1qtnf2	10375307	2.65307		Pld5	10360463	-2.3765		Nkx2-5	10449292	3.34558		Gm906	10409208	-3.13606
Shfm1	10543054	4.15295		Rgnef	10411395	-3.97465		BC031353	10587085	2.65296		LOC674623	10464359	-2.37359		Dgkb	10395428	3.34248		Glra3	10571829	-3.13453
Itga9	10590031	4.15173		C4a	10450280	-3.97367		Abhd8	10579500	2.65039		Mlh3	10401616	-2.37334		Ilk	10556005	3.34133		Hnrnpa1l2	10406226	-3.13395
B3gnt2	10384656	4.14687		Tcl1b2	10398091	-3.96986		Rsad1	10390022	2.6497		Jakmip3	10558468	-2.3727		Pura	10454877	3.3381		Olfr351	10482123	-3.13385
Ptpn23	10597136	4.14342		EG667141	10538781	-3.96847		Lrrc42	10514902	2.64865		1100001G20Rik	10379736	-2.37175		Tmem29	10607246	3.33766		Slc26a5	10528360	-3.1332
Bat1a	10444761	4.14102		Cd160	10500406	-3.96778		Spg20	10492102	2.64838		EG626732	10556125	-2.37129		Casp3	10571696	3.33759		Zfp810	10591763	-3.131
Fah	10565315	4.13924		Glra4	10606880	-3.96635		Siah2	10498332	2.64791		Reg1	10539200	-2.37062		1810046K07Rik	10593473	3.33748		Fpr-rs7	10448146	-3.12958
Tbl2	10526302	4.13664		Foxn2	10447431	-3.96338		Ipo11	10411974	2.64597		Acsl1	10571657	-2.3705		Dusp15	10488678	3.33495		Chrna3	10593756	-3.12889
Atg5	10362922	4.13624		Pafah2	10508974	-3.96174		Purb	10384152	2.64445		Bckdha	10561063	-2.36903		Vps11	10592830	3.33393		Olfr807	10373640	-3.12716
Havcr1	10375463	4.13505		4931431F19Rik	10566304	-3.95951		Barx1	10404982	2.64359		5730590G19Rik	10554325	-2.36749		Map2k3	10376733	3.33379		Ccr2	10590631	-3.12706
Rxrb	10444137	4.13505		Lims1	10363265	-3.95844		Psma1	10567072	2.64218		Elovl5	10587284	-2.36705		Trip6	10534718	3.33373		4732465J04Rik	10365926	-3.12031
Erv3	10487890	4.13412		Plch2	10519069	-3.95346		Zfp608	10458940	2.64127		Hk3	10409376	-2.36696		LOC633944	10394682	3.32979		4933439C10Rik	10376507	-3.1153
Nfkbib	10561516	4.13381		Folr1	10566034	-3.95084		Ptprcap	10460371	2.6412		Tbx19	10359701	-2.36631		EG433481	10488233	3.32474		Ighv1-72	10403060	-3.11394
Map2k2	10364971	4.13246		Usp43	10387138	-3.95041		Mfap4	10376778	2.63902		Kif5c	10471994	-2.36372		Ppp1r12c	10559524	3.32452		Hsf2bp	10449756	-3.11327
Ube2r2	10504047	4.13151		Enpp5	10445338	-3.94964		Cldn7	10377673	2.63831		Las1l	10605831	-2.36137		Olfr429	10351891	3.32067		Sav1	10400795	-3.11101
9030624J02Rik	10556658	4.12957		Diras1	10371032	-3.94879		Mcm7	10534974	2.63791		0610010O12Rik	10454881	-2.35729		Tmcc3	10365891	3.32024		Ddhd2	10577838	-3.11036
Pcdh20	10421911	4.12078		Hexdc	10383518	-3.94817		Pm20d2	10511923	2.63673		Smndc1	10532275	-2.35685		Il11	10559667	3.31772		Rgnef	10411395	-3.10975
Rhag	10445192	4.11956		Keg1	10461758	-3.9478		Med16	10370665	2.63559		Irx6	10573916	-2.35657		3632451O06Rik	10419416	3.31476		Olfr282	10426592	-3.10939
Etv3	10492997	4.11898		Ptger3	10497079	-3.94778		Pde4b	10506335	2.63403		Vps25	10381304	-2.35278		LOC100134990	10384715	3.31473		Mst1r	10588731	-3.10801
Cish	10588577	4.11838		Pcdh24	10405303	-3.94644		Med13	10389451	2.6314		OTTMUSG00000002567	10346840	-2.35108		Gm7183	10589793	3.3107		Nfil3	10409278	-3.108
Hist1h4h	10404024	4.11199		Olfr1441	10461715	-3.94563		Gstp2	10464586	2.63065		Ifngr1	10361897	-2.34917		Slitrk3	10498707	3.3105		Iqcd	10525103	-3.10659
1700025G04Rik	10358717	4.11138		Colec10	10424105	-3.94546		AI661453	10445678	2.62963		Stfa3	10439299	-2.34835		Lce3b	10493896	3.30992		Sin3b	10572838	-3.10481
Tasp1	10488090	4.10949		Lamc2	10358787	-3.94236		Htr1b	10595324	2.62879		Iqcf1	10588538	-2.34722		ENSMUSG00000054483	10529799	3.30958		Parl	10468990	-3.10343
Higd1a	10597871	4.10938		Skap1	10380672	-3.94087		Tmem222	10517028	2.62644		Eif3b	10526977	-2.34682		Mapre3	10520544	3.30772		Ccna2	10497831	-3.1021
Wdr55	10454984	4.10924		ENSMUSG00000055072	10388952	-3.94006		EG619597	10348906	2.6258		Apex1	10414522	-2.3434		Nkx3-2	10529752	3.30727		Fbxo48	10374400	-3.10026
Pdhx	10485429	4.10795		Bahd1	10474851	-3.93945		Herpud2	10591869	2.62435		Haus1	10459844	-2.34252		Dnahc7a	10354576	3.30572		LOC640684	10440734	-3.10009
Defb48	10420721	4.10729		Trib1	10424370	-3.93608		Mrpl30	10345620	2.62409		Spsb3	10442629	-2.34222		Fbxw12	10597011	3.30461		ENSMUSG00000072938	10530087	-3.09758
Cyp27a1	10347481	4.10704		Itga8	10480090	-3.93377		Sik1	10449741	2.62386		Actrt1	10599425	-2.34065		1700001C02Rik	10520501	3.30454		Zfp382	10551822	-3.09642
Rnu7	10547793	4.10611		Chrna9	10522186	-3.93157		Atp7a	10601360	2.62315		Brsk1	10549679	-2.33867		LOC637882	10570666	3.30417		Chia	10495136	-3.09521
Gfm1	10492480	4.10131		Drp2	10601729	-3.92699		Entpd1	10463070	2.62248		Enah	10360764	-2.33811		6530411M01Rik	10447697	3.30405		Rfx6	10363090	-3.09232
Kcns2	10423647	4.10068		Chd8	10419638	-3.92524		Gulp1	10346000	2.6223		Trpv1	10378349	-2.33806		Capns1	10561842	3.30331		Ube2w	10353288	-3.09185
Cops5	10353050	4.10037		Otor	10476628	-3.92466		EG624367	10414427	2.61893		Ccr2	10590631	-2.33759		Myef2	10490843	3.30301		Lars	10458607	-3.09105
1810037I17Rik	10604019	4.09994		Lypd2	10429506	-3.9245		4930599N23Rik	10537426	2.61636		2210010C04Rik	10544326	-2.33717		EG627427	10455017	3.30061		Gmeb1	10516867	-3.09046
Nipal2	10428089	4.09988		Itpr1	10546803	-3.92202		Sh2d4a	10572097	2.61547		Ppig	10472570	-2.33688		Tpd52l2	10479627	3.3005		H2-Ab1	10444291	-3.08943
Mat2b	10385239	4.09765		Ly6g6c	10444674	-3.92148		Fto	10573893	2.6151		ENSMUSG00000055790	10383351	-2.33658		Rgs22	10428124	3.29835		Zkscan1	10526726	-3.08899
Srrd	10532524	4.09657		Tmem161b	10406466	-3.92069		Narfl	10442857	2.61318		Cd164	10362803	-2.33596		Tubb6	10456400	3.29775		3300001P08Rik	10389882	-3.08575
Gm1077	10545202	4.09613		Olfr702	10566603	-3.91868		Fam53b	10568586	2.61032		Mosc2	10360848	-2.33495		Accs	10485241	3.29511		Plbd1	10548817	-3.0842
Rab37	10382449	4.09519		Kif12	10513641	-3.91797		Wnt6	10347491	2.60927		Gpld1	10404218	-2.33425		1700052K11Rik	10392035	3.29413		Gnal	10456363	-3.08379
Ercc4	10433620	4.09513		A630005I04Rik	10556487	-3.91396		OTTMUSG00000016083	10477852	2.60663		Xlr4c	10605034	-2.33328		6430550D23Rik	10488959	3.29162		Rab18	10453705	-3.08254
Sult2b1	10563377	4.09198		Lama5	10490384	-3.91314		BC005705	10542573	2.60159		Fam50b	10404535	-2.33273		Ddx4	10412155	3.29159		Klk5	10552526	-3.08205
Fkbp4	10548194	4.09151		Acbd3	10352281	-3.91293		Sra1	10458349	2.60157		1700024P04Rik	10411502	-2.32958		Prkaca	10573266	3.28845		Cog6	10498095	-3.08193
Nudt1	10526972	4.09069		Stc2	10384961	-3.90681		Gpr12	10535732	2.60052		Tceb3	10517443	-2.32872		Snora36b	10352497	3.28502		Pcyox1l	10459229	-3.07418
Ror1	10506201	4.08903		Olfr317	10386209	-3.90525		Myf5	10372226	2.59954		Canx	10385599	-2.32832		Fgf6	10542023	3.28346		Zfp212	10537934	-3.06976
A630001O12Rik	10576603	4.08901		Olfr1278	10474481	-3.90362		Apoa1	10585005	2.59867		Nutf2	10574899	-2.32828		2210020M01Rik	10382692	3.28311		Dhx37	10533961	-3.06742
1700040I03Rik	10545835	4.08881		Ctnna2	10545538	-3.90295		Fam65b	10404152	2.59653		Slc5a6	10529052	-2.32691		Npl	10358879	3.28099		Cst12	10476910	-3.06715
Arhgef6	10604713	4.08869		Runx3	10509030	-3.90148		Rilp	10378627	2.59624		Sgms2	10502224	-2.32644		Ren1	10349922	3.28052		Ube2u	10506213	-3.06637
Tiprl	10359723	4.08842		Clcn1	10537742	-3.90088		1110002B05Rik	10400321	2.59528		Wdr12	10550098	-2.32473		EG630499	10450069	3.27874		Mapk1ip1	10568780	-3.06619
Tigd3	10465260	4.08525		Tcfap2a	10408798	-3.89988		Atp8b2	10499666	2.59471		Npffr2	10523048	-2.3215		Ifi27l1	10397975	3.27775		Trmt6	10487969	-3.06533
Mgl2	10377774	4.08407		Cd300lb	10392796	-3.89948		Odz1	10604292	2.59286		EG268809	10424345	-2.31806		Mrpl28	10442948	3.27679		Oat	10568568	-3.06006
LOC622307	10523111	4.08331		2310046K01Rik	10477052	-3.89918		Pax6	10474312	2.59231		Igfl3	10550482	-2.3172		E130114P18Rik	10514561	3.27676		V1rd17	10550822	-3.05963
Clic4	10517336	4.0821		Foxd4	10466814	-3.89883		Atxn2l	10567919	2.59144		M6prbp1	10452030	-2.31603		Ldhb	10549097	3.27676		Rnf128	10602009	-3.05792
Ass1	10471154	4.08091		Sox15	10377588	-3.8988		Fbxo17	10551542	2.58964		3930402G23Rik	10576967	-2.31375		2810403A07Rik	10493292	3.27289		Dmgdh	10406646	-3.05548
Clec5a	10544273	4.07887		Itgb3	10381809	-3.89787		Htr1a	10407034	2.58498		1700066M21Rik	10346337	-2.31354		Gucy2g	10468562	3.27068		Clec12a	10542164	-3.05405
Ercc8	10407057	4.07811		Snx21	10478580	-3.89323		Sytl3	10441530	2.58458		Wdr49	10498763	-2.30992		Hsd17b7	10359917	3.27038		Adam5	10577712	-3.05157
1810011O10Rik	10577641	4.07744		1700090G07Rik	10447337	-3.89323		Abi3	10390186	2.58193		Zcchc4	10521848	-2.3091		EG380907	10420479	3.26776		Pcgf2	10390458	-3.05016
Map3k12	10433008	4.07648		Kcna1	10548047	-3.89076		Cbr1	10436967	2.58165		Dscam	10441195	-2.3072		Tmem202	10594177	3.26752		Trpv5	10544365	-3.04984
Mgst1	10542470	4.07637		Atad3a	10519183	-3.88899		Cyp11b1	10429538	2.58105		Tnip3	10538791	-2.30626		Fat4	10491732	3.26483		Oxsr1	10597627	-3.04715
Gpr180	10416989	4.07531		Olfr710	10566615	-3.88831		Rab6b	10588283	2.57954		Tuba4a	10355806	-2.30425		Cypt4	10583900	3.26384		Trip13	10410560	-3.04685
Zfyve19	10474921	4.07422		Slc4a1ap	10520815	-3.88799		Zscan10	10442302	2.57866		Ankrd52	10367305	-2.30315		Arl4d	10381474	3.26213		Strm	10396862	-3.04454
Pex26	10541290	4.07036		Zswim5	10507379	-3.88773		Rps21	10479362	2.57717		Ppp2r2b	10458645	-2.29922		Ttll11	10482075	3.25919		Vars2	10450533	-3.04363
EG665085	10442030	4.06994		Nefh	10383920	-3.8876		Ptprt	10489305	2.57482		Fam164c	10397342	-2.29865		AU016765	10452442	3.25852		Sh3bgrl	10601449	-3.04233
2900062L11Rik	10601846	4.06856		Nedd4	10586933	-3.88404		Mds1	10497608	2.57459		Eif3c	10567941	-2.29607		D11Bwg0517e	10393594	3.25794		Tubgcp4	10475293	-3.04094
Tex264	10596533	4.06842		Pxt1	10449523	-3.88388		Hoxa11	10544801	2.57187		Pcbp1	10545917	-2.29434		Cops6	10526743	3.25696		Canx	10385599	-3.03799
As3mt	10463704	4.06714		Lmbrd2	10422980	-3.88362		Tcf12	10594879	2.57102		Arhgap11a	10485963	-2.29359		Alox12	10387821	3.25401		Cct6b	10389072	-3.03566
Cdc7	10523802	4.06446		Gdnf	10422844	-3.88233		Slc10a6	10531887	2.56941		Arap2	10530100	-2.29319		Chst7	10598833	3.25226		Got2	10580969	-3.0349
Rbm17	10480057	4.0625		Smr3a	10522911	-3.88207		Dpp4	10483046	2.56577		Vrk1	10398173	-2.29138		ENSMUSG00000074845	10371319	3.25031		Prkaa1	10422707	-3.03377
Ndufa4l2	10366951	4.06232		OTTMUSG00000015184	10474477	-3.88203		ENSMUSG00000074728	10490775	2.56512		Cdk5rap2	10513824	-2.29128		AY702103	10445865	3.24758		ENSMUSG00000075527	10527799	-3.03318
Wdr6	10596931	4.06056		9230110F15Rik	10592182	-3.88097		Zbtb38	10595831	2.56305		Palm	10364502	-2.28853		C630050I24Rik	10575151	3.24635		Dkk1	10467006	-3.02987
Taf1b	10394942	4.05428		Amica1	10593032	-3.87879		Fzd5	10355152	2.56279		Pstpip1	10585555	-2.28852		Wfdc2	10478525	3.24622		Tbc1d8	10354168	-3.02792
Cenpo	10399254	4.05212		B3gat2	10345091	-3.87696		5730494M16Rik	10457888	2.56195		Ednra	10579812	-2.28704		1700008P02Rik	10497181	3.24381		Mapre1	10477353	-3.02776
Cstb	10364375	4.05133		Ms4a10	10466110	-3.87664		Casc3	10381032	2.56188		Ifitm6	10569020	-2.28621		Trim46	10499514	3.23869		Fgf20	10578281	-3.02749
Gm1078	10559698	4.05123		Adamts2	10375751	-3.87201		BC046404	10386916	2.56101		Mag	10562152	-2.28465		A230069A22Rik	10519203	3.23814		1190007I07Rik	10371293	-3.02698
Skint10	10515144	4.04581		Gjb4	10516487	-3.87042		Omg	10388954	2.56097		Dnmbp	10467871	-2.28377		Casd1	10536273	3.23688		Bub1	10487480	-3.02646
Rnf139	10424335	4.04532		Stk19	10450265	-3.86711		Fktn	10505044	2.55797		Prpsap1	10393309	-2.28318		Defa26	10570726	3.23502		Ntrk2	10405633	-3.02612
Cnp	10381154	4.03929		Gabbr2	10512807	-3.86638		Aga	10571774	2.55657		Dapl1	10472235	-2.28227		Gm1758	10433769	3.23465		Mrgpre	10569542	-3.02592
Plxdc1	10390519	4.03929		Cdc73	10358359	-3.8663		6430527G18Rik	10401698	2.5554		A230107C01Rik	10561690	-2.28128		1700111E14Rik	10537300	3.23413		Chl1	10540298	-3.02385
Golph3l	10494288	4.03864		Cadm3	10360349	-3.86622		Gpr162	10547888	2.55442		Bcl7b	10526311	-2.28011		Trim58	10376396	3.23244		Racgap1	10432511	-3.02358
Hopx	10530819	4.0379		AI314831	10485643	-3.8662		Sar1a	10363512	2.55354		Smu1	10512111	-2.27856		EG432939	10423291	3.2312		Olfr433	10351884	-3.02076
Pdcd5	10562491	4.03523		OTTMUSG00000017824	10604930	-3.86423		Tmem20	10462918	2.55119		Sec14l5	10433373	-2.27778		1700025H01Rik	10434930	3.23023		ENSMUSG00000053810	10395591	-3.01828
Slmo1	10456405	4.03511		Mmp12	10583056	-3.86404		Kcnj14	10563407	2.55111		Limk1	10534324	-2.27729		Col18a1	10370259	3.22931		Arg2	10396831	-3.01677
Ubac1	10480891	4.03464		S1pr1	10501586	-3.86239		Uhrf2	10462454	2.54938		Dhx37	10533961	-2.27646		Ahcyl2	10536931	3.22898		Fbxo15	10457077	-3.01428
Gtf2h2	10411646	4.03343		Rnf128	10602009	-3.85953		Tssk6	10572251	2.54884		Daglb	10527213	-2.27615		Htra1	10558150	3.22547		Tram1l1	10495869	-3.01398
Sec16b	10350864	4.03303		Amn	10398635	-3.85915		Nhej1	10355711	2.5466		Ugp2	10384579	-2.27393		Olfr952	10592406	3.22179		6330577E15Rik	10463826	-3.01384
Nop56	10476093	4.03269		ENSMUSG00000074917	10408935	-3.85692		Tlx1	10463482	2.54652		Top1	10478196	-2.27344		Tspan8	10366446	3.22043		Mrps35	10542824	-3.01383
Serpini1	10492628	4.03147		OTTMUSG00000010657	10518335	-3.85387		Eif4h	10534316	2.54263		Cdk2ap1	10533807	-2.27289		Tsc22d3	10606989	3.21943		Zfp422	10547173	-3.01309
Cyp39a1	10445308	4.02621		EG636398	10448062	-3.85334		Shank3	10426261	2.54173		Alox5	10547153	-2.27216		Krtap16-5	10440685	3.2174		Smarcb1	10370025	-3.00976
Fam118a	10425923	4.02428		Nav3	10372342	-3.8524		Snx6	10400336	2.54169		EG622962	10541049	-2.2709		2410003K15Rik	10538201	3.21699		Vmn2r19	10541623	-3.00535
Strn4	10550345	4.02412		Nrg4	10593776	-3.85096		Pdk2	10390103	2.54112		C230013L11Rik	10449415	-2.26909		2810453I06Rik	10600502	3.21633		Snrnp35	10525741	-3.00164
ENSMUSG00000067371	10538545	4.02094		Slc38a5	10598507	-3.8502		Acvr1	10482824	2.54078		Bpnt1	10352503	-2.26516		Magea1	10607454	3.21614		Cyp11b1	10429538	-3.00134
Nrcam	10395553	4.01942		Zfp386	10399038	-3.85013		Rims2	10423855	2.54075		BC019943	10571221	-2.26392		Cdh1	10575052	3.21474		ND2	10598034	-2.99863
Mtrf1	10416640	4.01894		Rffl	10389087	-3.84987		Olfm1	10470529	2.53769		Bace1	10584941	-2.26363		Mcpt4	10420247	3.2121		Pdrg1	10488687	-2.99806
Krt10	10390831	4.017		Fbxo27	10551534	-3.84903		Gtf3c6	10368739	2.53708		1700084C01Rik	10351465	-2.26344		Kcnc4	10501098	3.21197		Taar7d	10362162	-2.99525
Tubb2a	10408610	4.01601		Ascc3	10363007	-3.8484		Htt	10521261	2.5341		Chmp4b	10477572	-2.26153		LOC432471	10363915	3.21159		Arhgap21	10480381	-2.99167
EG628477	10458870	4.01524		4930442E04Rik	10464363	-3.84717		4930403L05Rik	10603738	2.53283		Gbf1	10463557	-2.2612		Med16	10370665	3.21129		Fam60a	10436442	-2.99063
Trip13	10410560	4.01504		Rce1	10464783	-3.8468		Gosr2	10391949	2.52992		Ltv1	10367931	-2.25984		C2cd2	10441313	3.21061		2410017P07Rik	10368845	-2.98959
Nipa2	10563838	4.01427		9430053O09Rik	10440417	-3.84611		Polr2f	10425257	2.52912		Zhx2	10424213	-2.25888		Bhlhe41	10549276	3.2081		AA408296	10361200	-2.98683
Stard10	10555460	4.01192		6130401L20Rik	10491212	-3.84454		EG622645	10446549	2.52905		EG621343	10502442	-2.25888		Fcrlb	10360012	3.2052		EG667207	10498591	-2.98648
Tesp2	10353786	4.00593		Mylk4	10408543	-3.84412		Pik3ca	10491331	2.52778		Rab44	10443470	-2.25882		Defa25	10570723	3.20085		Nudt16l1	10433331	-2.98645
Stk11	10364683	4.00119		Ube2g2	10364293	-3.84377		2410066E13Rik	10538408	2.52692		Npvf	10544704	-2.25656		Dytn	10355117	3.19898		Cab39l	10415678	-2.98567
Gramd1c	10439547	3.99913		Otud7a	10553842	-3.84247		Ripk2	10511703	2.52479		2700097O09Rik	10400383	-2.2556		Cpne6	10415228	3.19815		Malt1	10456296	-2.98447
Lca5	10595382	3.99711		Olfr653	10555875	-3.84162		1700016K19Rik	10378749	2.5245		EG668184	10459802	-2.25474		1700001L05Rik	10430993	3.19742		Fam49b	10428983	-2.9828
Copa	10351703	3.9952		Tspan13	10400023	-3.84087		Ticam1	10452022	2.52408		OTTMUSG00000011275	10514313	-2.2528		Alx4	10474081	3.1971		AI182371	10482004	-2.98243
Iah1	10394914	3.99376		4933427E11Rik	10424660	-3.8399		Pom121l2	10403973	2.5236		Ldb2	10529875	-2.25104		A330008L17Rik	10574423	3.19492		Pole3	10513622	-2.98215
Qrsl1	10368935	3.98874		Rhox6	10599296	-3.83747		Camsap1	10480878	2.52293		Lrrfip2	10589723	-2.2478		Msc	10353213	3.19464		R3hdm2	10366909	-2.97976
3110001D03Rik	10513952	3.9885		F630111L10Rik	10498357	-3.83638		4930432M17Rik	10495668	2.51819		Sgpp1	10401028	-2.2476		Klf4	10513008	3.19236		V1rc21	10538558	-2.97953
Olfr1052	10473503	3.98764		Smox	10476301	-3.83587		Zfp37	10513544	2.51793		Dlgap5	10419323	-2.24468		Tuft1	10500011	3.1902		Trmt5	10400975	-2.97743
P2rx1	10378240	3.98671		Cryaa	10443830	-3.83356		Ctss	10494271	2.51776		Snx31	10428176	-2.24415		Ints6	10420694	3.18849		EG216081	10369890	-2.97323
2900092E17Rik	10568131	3.98648		Slc9a4	10345840	-3.83163		EG328231	10404766	2.51595		Vcam1	10501608	-2.24407		Serpina3b	10398032	3.18669		D2Ertd750e	10474825	-2.9732
Capzb	10509620	3.98583		Fcrl1	10492971	-3.82971		Zbtb25	10401063	2.51497		Ttll11	10482075	-2.24291		Fam38b	10459335	3.18649		ENSMUSG00000075542	10425319	-2.97255
Arpc5l	10471904	3.98489		ENSMUSG00000073607	10458088	-3.82598		Rph3al	10388476	2.51347		Zscan20	10516507	-2.24251		Espn	10518882	3.18633		Olfr600	10566207	-2.97073
Rnasen	10423185	3.9845		Tekt3	10376941	-3.82385		OTTMUSG00000000461	10408121	2.51172		Oaz2	10586441	-2.24213		Rpl41	10591867	3.18512		Wbp11	10548859	-2.97067
Arl3	10468231	3.98195		Nppa	10510265	-3.82296		Map2k5	10594353	2.51115		Lpar4	10601412	-2.24004		Stac	10597309	3.18257		Olfr478	10566670	-2.96985
Dand5	10580202	3.9794		Gm73	10406777	-3.81995		Flrt2	10397633	2.5104		Nptx1	10393662	-2.23406		Kifc1	10443047	3.18254		EG225457	10458760	-2.9679
Mrpl50	10512901	3.97732		Lrit2	10414168	-3.81866		Wnk4	10381311	2.50965		Wdr7	10456206	-2.23334		Stk33	10566730	3.17928		4632417K18Rik	10461723	-2.96664
Gadd45gip1	10573430	3.97598		Avil	10366774	-3.81801		4930524L23Rik	10598289	2.50898		Olfr684	10566427	-2.23163		1700123I01Rik	10460771	3.17905		C1qtnf7	10521616	-2.96298
Exod1	10567412	3.9756		Ston2	10401891	-3.81638		Sh3d20	10391914	2.50671		4933407H18Rik	10521068	-2.22868		Afmid	10382985	3.17894		Ppyr1	10418898	-2.96291
Sft2d1	10453562	3.97497		Usp26	10604551	-3.81356		Sgce	10542965	2.5035		Ttll1	10431017	-2.22856		Apod	10439009	3.17687		Chrnb3	10571170	-2.96256
Psd2	10454856	3.97414		Lamp2	10604187	-3.81349		ENSMUSG00000066938	10453139	2.50095		Mfsd1	10492499	-2.22613		Speer4e	10528183	3.17684		Fgf16	10601350	-2.96087
Zbed4	10426093	3.97341		Ccnk	10398195	-3.81178		AA066038	10434131	2.50079		Vmn2r88	10405879	-2.22386		Tas1r2	10509811	3.17613		Cd5l	10492964	-2.96078
Tcte2	10447923	3.9699		Tox	10511416	-3.80849		Rcan1	10440993	2.49966		Pou2f2	10560964	-2.22302		Fsd2	10565137	3.1745		Kif2c	10515431	-2.95915
Zfp593	10517236	3.96988		Kif7	10564791	-3.80687		Mrpl14	10445430	2.49757		Ncaph2	10426225	-2.21901		Olfr750	10419561	3.17289		Fam47a	10600586	-2.95723
Znrd1	10450819	3.96315		Drd5	10521583	-3.8051		Cabp1	10532956	2.49737		Anubl1	10541034	-2.21898		Tpd52l1	10368566	3.17184		Pitpnb	10524314	-2.95457
Fsd2	10565137	3.96116		Olfr340	10471743	-3.80438		Chtf18	10448975	2.49656		Srp72	10522676	-2.21652		Ebi3	10445977	3.16973		Cenpe	10496204	-2.95114
2610528E23Rik	10440077	3.95704		Nlrx1	10592763	-3.80281		Drp2	10601729	2.49609		F2	10485027	-2.21517		Zfp93	10550865	3.16931		Heca	10368030	-2.94856
Ugdh	10530201	3.95162		Olfr461	10544271	-3.8028		Grm1	10367830	2.49604		4430402I18Rik	10466903	-2.21465		Acot1	10397148	3.16911		Mpzl3	10584835	-2.94775
Zpbp2	10380944	3.94687		Jag1	10488060	-3.80039		Fam148c	10370584	2.49555		Slc25a41	10452248	-2.21285		Xkr9	10344924	3.16858		Ube2c	10478572	-2.94671
Tjap1	10451248	3.9466		Olfr1480	10461814	-3.79944		Jmjd4	10376496	2.49342		Osgep	10458044	-2.21204		Sec14l3	10373846	3.16808		Eml3	10461311	-2.94642
Wdr48	10590191	3.9464		Ankib1	10527896	-3.79943		Tbxas1	10537410	2.49195		Rnf130	10375667	-2.21112		Trim54	10520706	3.16516		Tex11	10605954	-2.94498
Mrpl4	10583508	3.94539		Apob48r	10557434	-3.79859		Tnk1	10387668	2.49141		Slc43a1	10473367	-2.21058		EG665649	10579142	3.16463		Stil	10507112	-2.94401
Sae1	10560260	3.94452		Ndfip1	10455238	-3.79585		ENSMUSG00000073019	10601312	2.48948		Tm9sf3	10467560	-2.20681		Ccdc74a	10434089	3.16442		Zwilch	10594426	-2.94343
Lama3	10453939	3.94443		EG546989	10566215	-3.79413		Mzf1	10560078	2.48936		Txndc9	10396064	-2.20611		1700047I17Rik1	10400393	3.16429		Dtx3l	10439268	-2.9431
4732496O08Rik	10510061	3.9375		ENSMUSG00000074555	10490194	-3.79293		Art1	10555662	2.48696		Pgd	10518570	-2.20556		Pnkd	10453459	3.16386		Foxs1	10488673	-2.94194
Arhgap4	10605143	3.93687		Mknk2	10370931	-3.79128		Socs5	10447356	2.48641		Hesx1	10413393	-2.20412		Rnf14	10455227	3.16364		Depdc1b	10407081	-2.94151
2700049P18Rik	10349637	3.93671		2210412E05Rik	10552425	-3.78942		Lmtk2	10527306	2.4864		Hmgb1	10604663	-2.20146		Fdx1l	10591423	3.16333		V1rf2	10442184	-2.93758
ENSMUSG00000053218	10386169	3.93453		Olfr1272 // Olfr1272	10484884	-3.78871		Serpinf2	10388440	2.48585		Fgl2	10519983	-2.20027		Nudt3	10449363	3.16033		A230083H22Rik	10461878	-2.93707
Bap1	10413752	3.93448		Fam116b	10431463	-3.78869		2900010M23Rik	10596377	2.48568		Tnfsf14	10452307	-2.20021		Clip4	10446739	3.15895		Olfr1264	10484858	-2.9364
OTTMUSG00000009725	10517419	3.93362		Parp6	10585905	-3.78309		Mbd5	10471967	2.485		Cpped1	10437765	-2.19689		Raf1	10547034	3.15767		Hist1h4i	10408113	-2.935
Capn3	10475144	3.93293		LOC435333 // LOC435333 // LOC435333 // LOC435333 // LOC435333 // LOC435333	10403079	-3.78244		Col4a4	10356088	2.48252		Gpr97	10574276	-2.19654		Prmt2	10370072	3.15729		1500031L02Rik	10435004	-2.93453
Ptges	10481518	3.93242		Trpc1	10595753	-3.78131		Twist2	10348632	2.48085		Mcrs1	10510125	-2.19433		Rhoa	10588893	3.154		Kctd9	10416155	-2.93407
Nudt2	10504064	3.93135		Odz2	10385203	-3.78123		Irf2bp1	10550527	2.4803		Pde3a	10542575	-2.19427		4930533L02Rik	10557313	3.15341		Sos2	10400718	-2.93344
Irf2bp1	10550527	3.93105		Tnnc1	10413726	-3.78054		4930412F15Rik	10512612	2.48004		Rab3b	10506883	-2.19395		Nrg1	10578045	3.15313		Olfr1162	10484712	-2.93203
Snx18	10412227	3.92534		Tmprss7	10439675	-3.77846		Elovl7	10407072	2.47911		Acoxl	10475845	-2.19383		Scube2	10566822	3.15272		Clstn3	10547719	-2.93151
Faah	10515220	3.92435		Osbpl8	10366310	-3.77701		Tubb4	10452295	2.4774		Smok2b	10441862	-2.19345		Sgsh	10393648	3.15086		Batf2	10460767	-2.92758
Bri3	10527327	3.92393		EG209380	10566580	-3.77689		A830005F24Rik	10404979	2.47655		Tlr1	10530145	-2.19162		Herc5	10538590	3.15085		Ifi47	10375515	-2.92546
Wbp1	10545644	3.92192		Hsd3b6	10500559	-3.77583		Gemin4	10388517	2.47495		Car14	10500283	-2.19002		Fam120a	10409099	3.1492		Akr1c20	10407456	-2.9249
Hadha	10528929	3.92007		Hoxd10	10472958	-3.77553		1700061G19Rik	10446190	2.47489		Usp16	10436708	-2.18788		5830453K13Rik	10431946	3.14855		Ebna1bp2	10507557	-2.92447
Lax1	10468898	3.9128		Ktn1	10414374	-3.77466		Casc4	10475378	2.47104		1200014J11Rik	10378271	-2.18671		Ccdc73	10474274	3.14563		ENSMUSG00000074696	10497323	-2.92136
Shmt2	10373202	3.91168		Pla2g2d	10509577	-3.77372		EG329126	10354205	2.46969		Prdm9	10448064	-2.18483		Tcfap2a	10408798	3.14526		Drd4	10558866	-2.92046
Rab3b	10506883	3.90625		Clca3	10502622	-3.77358		Lingo3	10370999	2.46948		Etfb	10552418	-2.18352		EG622178	10465043	3.14487		Iqcf3	10596509	-2.91993
Pdcd6	10410617	3.90601		8030463A06Rik	10505481	-3.7708		OTTMUSG00000000071	10388728	2.46897		Bet3l	10362479	-2.17928		4932412H11Rik	10519414	3.14277		1300014I06Rik	10408629	-2.91976
Camk1d	10479852	3.90597		Fbln2	10540085	-3.76793		A730045E13Rik	10570972	2.46897		9330159F19Rik	10362372	-2.17904		2410017I17Rik	10444997	3.1393		Pnpla1	10443438	-2.9191
Kif22	10568150	3.90429		Ocrl	10599435	-3.76792		Gltp	10532857	2.46871		Atrn	10601612	-2.17779		Klra9	10548532	3.1376		ENSMUSG00000075295	10362102	-2.91837
Timm50	10561388	3.89298		Abcg4	10592772	-3.76663		Nr1d2	10417734	2.46766		4632417K18Rik	10461723	-2.17733		4930408F14Rik	10598222	3.13701		Qser1	10485622	-2.91555
Zcchc8	10533687	3.89249		Lhfpl3	10520043	-3.76573		4933406P04Rik	10368173	2.46645		Fam83f	10425421	-2.17725		Olfr810	10373642	3.13451		Olfr450	10537799	-2.9155
Zfp667	10549842	3.88974		Mfsd1	10492499	-3.76486		Cbln1	10580469	2.46426		Adamts13	10470349	-2.1751		Cd8b1	10538979	3.13438		Wdr5b	10435487	-2.91517
Aig1	10367973	3.88843		Rgs8	10350725	-3.76387		Nudt17	10500378	2.46237		Mpp3	10391518	-2.17407		Tnni2	10559200	3.13152		9130017K11Rik	10377253	-2.91513
Sema4c	10353899	3.88745		Elavl2	10514352	-3.76379		1700027D21Rik	10364217	2.46202		Lce1l	10499945	-2.17398		EG434729	10598569	3.13017		Fam123c	10345401	-2.91427
Cpsf1	10429972	3.88645		Rab7	10546092	-3.76352		Tulp4	10441497	2.46114		Cep350	10359086	-2.17395		Slco1c1	10542596	3.13003		OTTMUSG00000002182	10390954	-2.9137
Tmod4	10494160	3.88607		Ngfr	10390175	-3.76303		AI428936	10551872	2.45947		Hspbap1	10435443	-2.17367		Samd8	10413125	3.1295		Inpp5e	10481011	-2.91328
Med11	10377822	3.88286		Wnt9a	10376490	-3.76269		Sept6	10604057	2.45688		Lsm3	10540118	-2.17252		Igfbp2	10347277	3.12584		Drd3	10435793	-2.91303
Gcdh	10580233	3.88263		2010005J08Rik	10384004	-3.76244		Pard6g	10456988	2.45683		Dnajc11	10510604	-2.16982		D6Wsu116e	10541002	3.12361		Kif20b	10462632	-2.91039
Psma7	10490370	3.87937		Krtap26-1	10440657	-3.76214		Tob2	10430770	2.45672		Serpina1d	10402394	-2.16002		Bend5	10507032	3.12291		Zyg11b	10514985	-2.90673
Tle1	10513884	3.87923		Pbx4	10572241	-3.76136		Enox1	10416541	2.45263		Pdcl3	10345666	-2.15938		Iqch	10594381	3.1193		V1rc29	10544995	-2.90661
Olfr887	10584372	3.87862		Ubqln3	10566306	-3.75987		Olfr557	10555734	2.45257		Calcb	10556546	-2.15712		Tat	10575349	3.11585		Olfr552	10555725	-2.90539
Atp1b3	10598994	3.87599		Pkn2	10502484	-3.75581		Madcam1	10364444	2.45158		Zfp330	10579969	-2.15687		ENSMUSG00000054488	10541083	3.11524		Clec4d	10541614	-2.90491
Thbs1	10474700	3.87517		Nhlrc1	10409016	-3.7518		Mllt4	10441864	2.45131		Slc35c2	10489646	-2.15669		Kirrel2	10561942	3.11472		LOC100040113	10578647	-2.90277
Rai2	10603000	3.87221		5730410E15Rik	10428426	-3.74973		Klf9	10466680	2.4504		BC017158	10568376	-2.15593		Prr15	10538373	3.11472		Il4	10385832	-2.90218
Ppp2r2b	10458645	3.87124		Pcsk5	10466530	-3.7492		Ptplad2	10514275	2.4478		A2m	10541354	-2.15494		Olfr954	10584492	3.11216		Samsn1	10440393	-2.90111
Hmox2	10433292	3.86908		EG382722	10403394	-3.74889		ENSMUSG00000073519	10457038	2.44583		Abce1	10579874	-2.15397		Nbr1	10381419	3.11085		Pabpc5	10601561	-2.90038
Cdc40	10368762	3.86792		EG622408	10407255	-3.74829		Syk	10405216	2.44579		4930578I06Rik	10420798	-2.15249		Gapvd1	10481870	3.11033		Lrrc55	10484503	-2.89839
Ucp2	10555389	3.86737		OTTMUSG00000016588	10479217	-3.74633		Gramd2	10585942	2.44442		Ysk4	10357381	-2.15197		1700008P20Rik	10560851	3.1089		Tmem225	10584528	-2.89775
Cby1	10425293	3.86699		Olfr346	10471751	-3.74621		Olfr666	10566398	2.44378		Scara3	10420891	-2.15161		Hoxc8	10427290	3.10661		Pak2	10439032	-2.89757
Fkbp11	10432243	3.86688		Atp10a	10553788	-3.74438		Lsm14a	10562382	2.44294		Fcer1g	10360070	-2.14998		Pik3cd	10518686	3.10569		Slc13a1	10543411	-2.89749
Kng1	10434719	3.86663		Ptgds	10480734	-3.74394		Aldob	10512904	2.44218		Nars	10459405	-2.14797		Ppm2c	10511580	3.10524		Olfr1445	10461780	-2.89709
Pak1	10555118	3.86495		A330070K13Rik	10534148	-3.74382		Pnpo	10390299	2.44134		EG623849	10519688	-2.14724		Olfr741	10414481	3.1038		ENSMUSG00000075308	10361867	-2.89602
Mfng	10430389	3.86278		Cpeb2	10521602	-3.74368		Mybpc1	10371627	2.44028		Olfr1389	10375553	-2.14663		Fosb	10560481	3.10281		Wdr64	10352020	-2.89477
OTTMUSG00000008370	10562320	3.85996		Plcxd3	10422628	-3.74331		Rfpl4	10559716	2.43931		2610029I01Rik	10511803	-2.14559		Hrg	10434709	3.10256		Suz12	10379346	-2.89099
B930041F14Rik	10511136	3.8595		Olfr1016	10484547	-3.7428		2310028H24Rik	10512265	2.43918		Pramel7	10484669	-2.14303		Rsu1	10480145	3.10205		Olfr1377	10375789	-2.89094
Homez	10419867	3.85898		Tpsg1	10442801	-3.74139		Cdc37	10591472	2.43797		Slc26a10	10373054	-2.14202		Zfp768	10568225	3.09962		2310046K01Rik	10477052	-2.88705
Dtwd1	10475648	3.85521		Kiss1r	10364550	-3.74014		Sirt6	10371256	2.43561		Ngp	10589535	-2.14141		Gipc3	10371134	3.09535		Pdik1l	10517243	-2.88688
6720456B07Rik	10540785	3.85485		Sdk1	10527051	-3.73808		Ntf3	10548038	2.43526		Sprr2b	10493860	-2.13953		D130043K22Rik	10404195	3.09527		Cenph	10411728	-2.88567
Lrriq3	10497033	3.85396		Ptgir	10550394	-3.73733		Kdm5c	10602644	2.43437		Pcdhb11	10455088	-2.13723		Gzmf	10420295	3.0939		Tdg	10564663	-2.88527
Pmch	10365574	3.85393		2310007B03Rik	10356764	-3.7346		Ins1	10463906	2.43362		Rasa2	10595805	-2.13672		Tas2r140	10548677	3.0937		Tnfsf4	10351095	-2.88427
St3gal5	10539080	3.85075		ENSMUSG00000068293	10435745	-3.73373		Cdk2	10373530	2.4309		Dmkn	10552044	-2.13579		Npff	10433027	3.09357		Lzts1	10579043	-2.88377
Pdcl3	10345666	3.85011		Usp47	10556350	-3.73281		5430433E21Rik	10594517	2.42957		Acsm4	10556749	-2.13542		Bnip3	10568785	3.09085		Tpr	10350535	-2.88209
Mta1	10398972	3.84865		Mbd1	10456622	-3.73163		Zfp408	10485042	2.4294		Blzf1	10359677	-2.13498		Mafa	10429621	3.09061		1600002H07Rik	10448495	-2.8811
Emr4	10445953	3.8466		Huwe1	10602501	-3.73122		Ifne	10514335	2.42701		Eif4enif1	10373709	-2.13412		EG667874	10426503	3.08891		Grn	10381588	-2.88108
Ppih	10521690	3.8442		M6prbp1	10452030	-3.73094		Hba-a1	10375051	2.42665		Klra6	10548497	-2.13019		Polr3c	10500388	3.08651		OTTMUSG00000012703	10482863	-2.88005
Tox4	10414693	3.84256		Lnpep	10448094	-3.72889		Dzip3	10439798	2.42431		Wdr18	10364571	-2.12483		Pcdh15	10363921	3.08607		4930562C15Rik	10433302	-2.87896
Kptn	10550250	3.84196		Crebzf	10554895	-3.72864		Il17re	10540679	2.42412		Hmgb2	10571870	-2.12351		Eif4h	10534316	3.08415		Defb46	10570618	-2.87885
Cd59b	10474223	3.83619		Wdr38	10471891	-3.72693		Ptdss2	10558811	2.42131		Olfr1032	10473489	-2.12056		Olfr45	10558668	3.08361		EG432534	10374325	-2.87628
Nudcd2	10375234	3.83114		Zfp652	10380560	-3.7256		Arhgap12	10457250	2.42061		Ywhae	10378739	-2.11888		Foxl2os	10595911	3.08338		Lrpprc	10453334	-2.87151
Snrnp25	10375031	3.82597		Tmed8	10401737	-3.72306		Rbx1	10450646	2.41895		Jarid2	10404848	-2.1188		Hoxb3	10380654	3.08252		Pkn2	10502484	-2.87079
Golga5	10397866	3.82571		Hoxa6	10544774	-3.71843		EG333669	10364112	2.41785		Brpf1	10540622	-2.1184		2900092E17Rik	10568131	3.08212		AU018778	10580663	-2.87067
Mocs2	10407307	3.82354		Adss	10360522	-3.71617		1700023I07Rik	10599028	2.41782		Ubr7	10397895	-2.11713		Plxdc2	10469457	3.07923		Tm6sf2	10572271	-2.86978
Tnfaip1	10388869	3.82258		Adcy5	10435388	-3.71448		Amotl1	10590918	2.41668		Slc10a7	10572989	-2.11586		Peg12	10564266	3.07907		Itgax	10557895	-2.8691
Pus10	10374706	3.82245		Ctnnd1	10484402	-3.71412		2310005N03Rik	10360542	2.41001		Etd	10599650	-2.11515		C030006K11Rik	10430105	3.07851		Olfr1016	10484547	-2.86899
Pacs1	10464949	3.82082		Hydin	10575380	-3.70969		Bach1	10436734	2.40911		Ela2	10364535	-2.11513		Ldha	10553301	3.07756		Birc5	10382998	-2.86854
Islr	10594044	3.82073		Cyp2d10	10430866	-3.70965		Erf	10561004	2.40886		1810013D15Rik	10497086	-2.11424		Acot7	10510687	3.07741		Glt8d2	10371296	-2.86783
Tmem42	10590529	3.82056		Traf2	10480760	-3.70657		Sepp1	10422598	2.40868		Zc3h8	10487564	-2.11371		Umodl1	10443704	3.07667		Pcm1	10571474	-2.86636
Keap1	10591482	3.82002		Tnfrsf23	10569504	-3.70505		Pnmal1	10550402	2.40678		Spata2	10489904	-2.11266		Olfr1423	10466276	3.07652		Psmb11	10415086	-2.86626
LOC638361	10411774	3.81868		Txk	10530516	-3.70494		Lphn1	10580056	2.40582		Rpn2	10477946	-2.11191		Creb3	10504349	3.07467		Mycs	10603249	-2.8646
Tuba3b	10542727	3.81796		Ctcfl	10490138	-3.70405		Bclp2	10501007	2.40579		Hmmr	10385248	-2.11028		Ube2s	10585586	3.07326		Gapt	10412078	-2.86445
Ndufs8	10464551	3.81679		Zfp292	10512011	-3.70205		Cib2	10593713	2.40331		Afap1	10521440	-2.10914		Slc25a39	10391669	3.07307		Krtap10-4	10370330	-2.86258
Diablo	10533633	3.81656		Gcat	10425211	-3.70202		Tbrg3	10430929	2.40275		Ly6f	10424691	-2.1091		C6	10422635	3.07235		Ankrd49	10590968	-2.86162
Pxmp2	10532339	3.81611		Syvn1	10460706	-3.70163		Epha1	10544417	2.40162		Tcf23	10520633	-2.10717		Hao3	10500570	3.07189		EG331529	10601805	-2.85957
Ammecr1l	10454469	3.81585		Atoh7	10363639	-3.70136		Olfr616	10566225	2.40122		Olfr1099	10484640	-2.10678		Thbs1	10474700	3.07023		Adcy1	10374202	-2.8561
Samd4b	10561461	3.81549		Olfr402	10378429	-3.70099		Crip2	10398996	2.39992		Podxl2	10546152	-2.10678		Olfr373	10572743	3.06837		Zfp623	10424746	-2.85521
Uqcrb	10412711	3.81456		Fhad1	10518096	-3.70092		Irf9	10415319	2.39763		Defb23	10488630	-2.10667		Rab3b	10506883	3.06687		EG639653	10459823	-2.85356
Hddc2	10362394	3.80841		Nr1h5	10500780	-3.69961		EG383528	10355454	2.39082		Lclat1	10446771	-2.10543		4930546C10Rik	10459614	3.06543		4933400N17Rik	10354216	-2.85154
Hoxc8	10427290	3.80725		Olfr1118	10473525	-3.69935		Cln3	10567964	2.38797		Smn1	10406881	-2.105		Atp11a	10570201	3.06434		Mtmr1	10599997	-2.85133
Sri	10519504	3.8064		Jsrp1	10370991	-3.69877		Parp9	10435457	2.38725		Rsph9	10451213	-2.10383		Pgpep1	10579335	3.06427		A230051G13Rik	10386344	-2.8468
Uxt	10603878	3.80434		Tas2r130	10548602	-3.69796		Micalcl	10556413	2.38566		Sav1	10400795	-2.10379		Olfr441	10537817	3.06163		Usp22	10386636	-2.84635
Fcgr2b	10360028	3.79569		Slc13a1	10543411	-3.69734		Arhgap17	10567702	2.38547		4933413J09Rik	10413270	-2.10356		Hmga2	10372796	3.06155		Gins1	10476989	-2.84562
Rpa3	10543114	3.79547		Usp32	10389339	-3.68965		BC018242	10583773	2.3802		Dbf4	10528077	-2.10294		Baiap2l1	10535559	3.0613		Tpp1	10566529	-2.84539
Was	10603440	3.79474		Ptpn5	10563685	-3.68952		Mrpl21	10460151	2.37929		Hp	10581605	-2.10253		Tcp11	10449401	3.0582		EG622976	10601456	-2.84458
Zfp628	10549723	3.79205		Olfr1362	10408062	-3.68942		ENSMUSG00000067371	10538545	2.37826		Ptgfr	10502805	-2.10013		Pacs2	10398936	3.05798		4732418C07Rik	10507190	-2.84435
Hsdl1	10582123	3.79146		Mrgpre	10569542	-3.68941		Isy1	10546066	2.37711		Snd1	10536762	-2.09955		Proc	10458016	3.0571		Rpl32-ps	10498651	-2.84341
Mett5d1	10485687	3.79091		Olfr1497	10466361	-3.68816		H2afy	10409557	2.37708		Cttnbp2	10543273	-2.09903		Nodal	10363481	3.05647		Mettl11b	10359644	-2.84242
Rnf123	10596815	3.78684		Fndc3a	10421488	-3.68463		A230046K03Rik	10365302	2.37624		Ctsg	10420261	-2.09876		Sec14l4	10373834	3.05608		Rbm34	10582823	-2.84147
Emg1	10547758	3.78423		Trim44	10485395	-3.68203		Ryr3	10485840	2.37622		Dmp1	10523693	-2.09804		Acacb	10524460	3.05458		Ncoa4	10413839	-2.84084
Pik3c2g	10542477	3.78177		Catsper3	10405552	-3.68181		Morn1	10510991	2.37198		Ncoa1	10399265	-2.09721		LOC631725	10442285	3.05378		Pam	10356968	-2.83897
S100a10	10493995	3.78142		Olfr957	10592412	-3.68159		Pik3cd	10518686	2.37175		Fam82b	10503484	-2.09667		ENSMUSG00000074347	10571824	3.05367		Cpn2	10438899	-2.83851
Spry4	10458555	3.78099		Gpr155	10483679	-3.67858		Cyp2u1	10502214	2.371		Efcab8	10477361	-2.09666		ENSMUSG00000073105	10395606	3.05296		Zfp668	10568311	-2.83677
Papss1	10496110	3.78082		6530401N04Rik	10400293	-3.67214		Fxyd7	10562204	2.37088		EG278181	10603791	-2.09348		Tmem106c	10426550	3.05152		Olfr397	10378417	-2.83669
1810020G14Rik	10441342	3.77885		Cdc2l5	10407892	-3.66907		Samd8	10413125	2.3695		Taar4	10362154	-2.093		Ripply1	10606941	3.05133		Cct4	10374564	-2.83667
Csnk1e	10430519	3.77869		Unc5b	10369388	-3.66852		Rnpepl1	10348670	2.36903		Mblac1	10526781	-2.09282		Zfp612	10575363	3.0505		Olfr794	10367509	-2.8357
Fam166b	10512465	3.7761		AU018778	10580663	-3.66747		Fam120a	10409099	2.3681		EG620143	10410463	-2.09175		Ypel1	10438069	3.04912		Top2a	10590648	-2.83243
H2afy	10409557	3.77575		Tmem114	10437575	-3.66655		Srpr	10584194	2.36785		Serpina1a	10402399	-2.09122		Cc2d1a	10580100	3.04843		Timm9	10400883	-2.82983
LOC677017	10518761	3.77427		Vmn2r-ps104	10410224	-3.66644		Mtap	10505894	2.36743		AI314180	10513268	-2.08987		1700061J05Rik	10430311	3.04761		Brca2	10527801	-2.82969
H2-T22	10450694	3.77326		Dub2a	10566205	-3.66609		2700023E23Rik	10522465	2.36676		Ereg	10523175	-2.08981		Chchd2	10534096	3.04746		Olfr1031	10473487	-2.82922
Ccdc124	10579437	3.77132		Olfr351	10482123	-3.66384		Tmem138	10466000	2.36302		4933440M02Rik	10567739	-2.08978		Col15a1	10504775	3.04543		Tcerg1	10455346	-2.82912
Bnip3	10568785	3.77088		Dab2	10422728	-3.65999		Iigp1	10455961	2.36295		Stom	10482030	-2.08881		Rps6ka4	10465427	3.04408		Rab11fip1	10577954	-2.82799
Srprb	10596137	3.77029		Lrrc46	10390319	-3.65954		Phtf1	10495012	2.36199		Eif4g1	10434481	-2.08653		Oaz1	10448089	3.04352		Kctd13	10557528	-2.82675
Fxyd1	10562211	3.76947		Pglyrp4	10493834	-3.65946		Crocc	10517842	2.36095		1110012L19Rik	10599951	-2.08543		1700020A23Rik	10476130	3.04141		Tomm40l	10360058	-2.82669
9430016H08Rik	10346340	3.76734		Sos2	10400718	-3.65888		Zfp821	10575291	2.35967		Ssr1	10408709	-2.085		Ciz1	10471387	3.03851		Smr3a	10522911	-2.82629
Cdc26	10513583	3.76453		Ifna9	10514296	-3.6583		Peo1	10463448	2.35942		EG217600	10400508	-2.08297		EG620155	10456968	3.0379		Lrrc28	10564467	-2.82589
D330045A20Rik	10601993	3.76096		A930002H24Rik	10452440	-3.65763		Slbp	10529299	2.35882		Erc2	10413461	-2.08021		BC057079	10505791	3.03738		Grik4	10592629	-2.82572
Gbx1	10528617	3.76091		Ppfibp1	10542791	-3.6574		Zfp1	10575609	2.35831		Zfand3	10443589	-2.07975		Olfr52	10484567	3.03685		Marchf5	10462791	-2.82205
Mtcp1	10605421	3.75946		Olfr804	10367517	-3.65544		9430008C03Rik	10489239	2.35785		Bin3	10416256	-2.07911		Olfr1034	10473494	3.03644		Dnajc10	10473190	-2.82001
Ankrd27	10552210	3.7585		1700018B08Rik	10582221	-3.65277		Rpp21	10450746	2.35782		Ms4a2	10466216	-2.07777		Myocd	10386996	3.03642		Bex6	10435009	-2.81994
EG640532	10351489	3.75789		Enpp4	10451054	-3.651		Kif26a	10398814	2.35775		Gsg2	10388234	-2.07446		4933413N12Rik	10449598	3.03589		Mki67	10568714	-2.81865
OTTMUSG00000001247	10513920	3.75482		Ifna5	10505888	-3.64715		Atp6v0a2	10525833	2.35727		Hck	10477250	-2.07366		BC027072	10452729	3.03545		Cdyl	10404578	-2.81629
Cdipt	10557560	3.75432		Slc25a38	10590245	-3.64528		Pgm2l1	10555303	2.35582		Gm355	10475879	-2.07318		Frat1	10463164	3.03336		Cd274	10462390	-2.81615
Cd36	10528207	3.75422		Heatr5a	10400254	-3.64254		Slc6a6	10540122	2.35556		Ccdc154	10442719	-2.0729		Gm4157	10559996	3.02984		Scn7a	10483353	-2.81409
BC049730	10550986	3.75228		V1rg12	10549996	-3.6422		Spcs1	10418475	2.35405		Alkbh4	10526487	-2.07153		Rpl22	10510720	3.02538		Cdk6	10519324	-2.81277
Fancb	10603135	3.75204		Ntn1	10387170	-3.63875		Pkn2	10502484	2.35226		Dbn1	10409464	-2.07112		Agr3	10395356	3.02523		Olfr914	10584433	-2.80961
Ptprt	10489305	3.75151		Foxn1	10388824	-3.63828		Samd9l	10542911	2.35205		BC018473	10382846	-2.07048		Cdv3	10596185	3.0252		Prps1	10602062	-2.80885
Cct3	10493193	3.74892		Csgalnact2	10547217	-3.63672		Cdx1	10459153	2.3506		Hist3h2a	10376455	-2.06977		Pdzrn3	10546725	3.02495		Cops5	10353050	-2.80654
Barx1	10404982	3.74802		Ecel1	10356379	-3.63631		Ptgs2	10350516	2.34757		Ccdc37	10546249	-2.06874		OTTMUSG00000005131	10384221	3.02445		Prl7a2	10408429	-2.80638
Mrps7	10382565	3.74767		ENSMUSG00000074233	10561525	-3.63467		Fyn	10362596	2.34676		Ip6k2	10589099	-2.06808		Irf9	10415319	3.02435		Myadm	10569707	-2.80564
Psmd1	10348004	3.74728		ENSMUSG00000076532	10545180	-3.63392		Krt14	10391052	2.34453		Zcchc17	10516778	-2.06668		Fn1	10355403	3.02404		Slc6a20a	10597960	-2.80503
Pnkp	10552760	3.74481		Stat1	10346191	-3.63381		Tnni3	10559558	2.3411		Kif23	10594251	-2.06614		Lgals2	10430425	3.02299		Olfr734	10419452	-2.80304
Cd96	10439744	3.74388		Chd4	10541803	-3.63349		Parp16	10586347	2.34003		Tmed1	10591537	-2.06535		Glt25d2	10350668	3.02283		Kif23	10594251	-2.8025
Psmc6	10414288	3.74342		Etv6	10542275	-3.63161		Ap1m1	10572786	2.33963		Olfr18	10591220	-2.06389		OTTMUSG00000016823	10569331	3.01994		Hps3	10497421	-2.80193
Irf5	10536898	3.74303		Cdh16	10581132	-3.63122		EG368203	10372338	2.33733		Olfr33	10566168	-2.06385		Klk1b1	10552562	3.01943		Olfr1151	10473574	-2.79979
Mep1a	10451016	3.74258		Fcnb	10481262	-3.62633		Rundc1	10381395	2.33719		Ak2	10508382	-2.0637		Trim9	10400866	3.01713		Rasl10b	10379677	-2.79857
2210023G05Rik	10574572	3.74225		Arhgap21	10480381	-3.62555		Lrrc8a	10470954	2.33704		3000002C10Rik	10597095	-2.06303		Slc35d3	10368159	3.01707		Kntc1	10525591	-2.79743
Zscan21	10526735	3.74191		Krtap16-7	10440721	-3.62452		Grin1	10480676	2.33693		Zfp111	10560818	-2.06286		Rbbp5	10349809	3.01579		Fam76a	10516994	-2.79627
ENSMUSG00000060500	10454840	3.74015		ENSMUSG00000074924	10436781	-3.62094		Entpd6	10476952	2.33664		Twistnb	10395312	-2.06256		Qtrtd1	10439532	3.01525		EG639025	10584248	-2.79617
Ndufa4	10543134	3.73926		Gfi1	10532124	-3.62042		Xlr5b	10605044	2.33613		Glg1	10581772	-2.06227		Timm17b	10598482	3.01406		OTTMUSG00000006556	10512065	-2.79532
Saa1	10563611	3.73802		Lce1c	10493889	-3.61861		H2-Oa	10444223	2.33507		Nol8	10405074	-2.06064		Klf12	10422013	3.01366		Cacna1b	10480492	-2.79428
Rax	10459471	3.73504		Cabp5	10550146	-3.61803		Tox4	10414693	2.33333		Myl12b	10452639	-2.05888		1700016G05Rik	10544263	3.01325		EG624855	10573610	-2.79375
1500041N16Rik	10580309	3.73488		4930503E24Rik	10366735	-3.61713		Ralgps2	10359201	2.33282		G6pc2	10472531	-2.05887		Pnmt	10380891	3.01128		Ly6d	10429520	-2.79175
Angel2	10352690	3.73447		Loxl2	10421184	-3.61408		Esx1	10606914	2.33182		Pip5kl1	10471443	-2.05796		Gps2	10377652	3.01126		Mre11a	10583264	-2.79079
Hlx	10360834	3.73393		Dock9	10422436	-3.61408		C1qtnf3	10423080	2.33072		H2-T3	10450735	-2.05689		Cldn15	10526514	3.01079		Dhrs4	10415176	-2.79077
Fyttd1	10435149	3.73372		Sag	10348301	-3.61032		Mknk1	10507218	2.33022		BC057079	10505791	-2.0564		Olfr297	10554727	3.00937		Ptprc	10358224	-2.79049
C330016O10Rik	10385709	3.73066		EG245174	10476939	-3.60755		Zfp110	10550029	2.32932		Gzf1	10476893	-2.05352		V1rh5	10404010	3.00936		Lyst	10403604	-2.79015
Snora7a	10547073	3.73011		Ggt6	10378082	-3.606		4930505N22Rik	10463513	2.32808		Paf1	10551496	-2.05296		Rftn2	10354741	3.00876		Rtf1	10475000	-2.78982
Mthfd2	10545672	3.72579		Otoa	10557076	-3.60555		Spnb1	10401068	2.32796		Avpr1b	10349644	-2.0523		EG382371	10369825	3.00806		Phtf2	10528238	-2.78845
Lyrm7	10385932	3.72558		Gpr56	10574259	-3.6051		Pkib	10363210	2.32725		Mmadhc	10482486	-2.05225		Gtpbp6	10532317	3.00787		Tcl1b4	10398111	-2.78808
2810433K01Rik	10459755	3.72432		Zc3h12d	10361698	-3.60417		Tcf4	10456522	2.32672		Fam186b	10432431	-2.05197		Hormad2	10383853	3.0066		Itgb3bp	10514650	-2.78749
Dus2l	10574944	3.72273		4930522N08Rik	10523513	-3.60398		Sytl4	10606619	2.32671		Tnni3k	10502982	-2.0519		Pzp	10548207	3.00435		B130024G19Rik	10554129	-2.78678
Fmc1	10537394	3.72266		Vwce	10461526	-3.60245		Ncoa3	10478718	2.32577		Polr3gl	10500362	-2.05112		Vmn2r18	10535974	3.00413		Hnrnpab	10385686	-2.78642
Ccdc89	10554893	3.72062		Arhgef2	10493267	-3.60214		Rassf7	10558840	2.32559		Gm4383	10431943	-2.05018		Mgll	10539894	3.00244		EG668565	10552306	-2.78594
Acbd6	10350777	3.7169		Ctsb	10415844	-3.60114		Trib2	10399470	2.32558		A430093F15Rik	10461553	-2.04706		Rgs20	10352957	3.00225		OTTMUSG00000015584	10488106	-2.78586
Mrpl37	10514884	3.71633		D830013O20Rik	10400981	-3.60097		Pemt	10386460	2.32228		Krtap16-10	10440704	-2.04658		Olfr1160	10484708	3.00173		Higd2a	10405287	-2.78329
Taf9	10512061	3.71515		Sbsn	10552037	-3.6001		Rps4x	10403253	2.32041		Trpm2	10370339	-2.04631		Nrk	10601942	3.00133		Kcnh5	10400989	-2.78227
Pkp1	10358124	3.71513		Man2a2	10564909	-3.5991		Sfrs8	10526014	2.31923		Mrvi1	10566943	-2.04511		Ergic3	10477777	2.9984		1700024P04Rik	10411502	-2.78222
Glrx5	10398085	3.71202		Col4a3bp	10406757	-3.59578		Bhlhe22	10490950	2.31922		Rab3il1	10461408	-2.04463		Tgm2	10489204	2.99623		Cd48	10351658	-2.7821
Hax1	10499705	3.71174		Parvb	10425852	-3.59543		4930483J18Rik	10425503	2.31906		Gmppa	10347639	-2.04385		Nek11	10596327	2.99502		Rcsd1	10359762	-2.77994
Cables2	10490467	3.71022		D430041B17Rik	10559681	-3.59417		Il18rap	10345824	2.31759		Cryba1	10388707	-2.0438		Sfrs12	10411839	2.99477		Anapc10	10573048	-2.77609
Mylpf	10557575	3.70819		Il27	10567987	-3.59385		Col18a1	10370259	2.31703		Alpi	10356367	-2.043		Cxcl13	10523359	2.99371		Tgfbr3	10532085	-2.77558
Mnd1	10499035	3.70597		Itpripl2	10567299	-3.59206		Bcr	10364009	2.31562		Ascc1	10363403	-2.04253		1700094D03Rik	10493626	2.99288		Mcpt8	10420254	-2.77543
Pdzd11	10605943	3.70239		Six3	10447288	-3.59194		Spag11b	10570590	2.31515		Mgam	10537509	-2.04184		Pgd	10518570	2.99252		Zfp763	10449971	-2.77543
Bank1	10502335	3.70235		4931417E11Rik	10545524	-3.59174		Olfr1086	10484624	2.31499		Habp4	10405811	-2.04014		Serpina3c	10402435	2.99088		Olfr569	10566184	-2.77215
EG677785	10360912	3.70214		Gjd3	10390705	-3.5908		Cisd2	10502329	2.31481		Caps2	10366376	-2.03738		1700116B05Rik	10436206	2.99009		2610034M16Rik	10452386	-2.77106
4933408J17Rik	10365812	3.70208		Olfr1402	10500443	-3.59038		Ptprf	10515613	2.31444		Hus1	10384322	-2.03697		Ttc38	10425999	2.99003		Mocos	10454353	-2.77031
Slc35f3	10576586	3.7011		ENSMUSG00000073675	10346321	-3.59011		Elp2	10454332	2.31275		Cct5	10428052	-2.03672		Tinagl1	10516735	2.98962		Napepld	10528332	-2.76998
Mmp28	10389177	3.70096		Esrra	10465485	-3.58998		Grcc10	10547789	2.31184		Zfp710	10554370	-2.03657		BC030336	10556957	2.98932		Psma6	10395816	-2.76824
Arl8b	10540480	3.70035		Tsen34	10549582	-3.58826		Chpf	10355864	2.31075		1810029B16Rik	10578964	-2.03654		Tbc1d14	10529549	2.98862		Olfr1055	10484588	-2.76815
Ykt6	10374106	3.69923		Rbm9	10430145	-3.58742		Sh2b1	10567903	2.31051		Kbtbd8	10540227	-2.03653		ENSMUSG00000053218	10386169	2.9862		Zfp341	10477557	-2.7668
1700027L20Rik	10348144	3.69567		Arfgef1	10353064	-3.58714		Elfn1	10526968	2.31032		Nxf2	10606746	-2.0352		Amotl1	10590918	2.98602		Nf1	10379262	-2.76579
Olfr923	10584466	3.69464		OTTMUSG00000016070	10478281	-3.58605		Rras2	10567043	2.31028		OTTMUSG00000011262	10505874	-2.0351		1810065E05Rik	10376376	2.98485		Pp11r	10431962	-2.76499
Zfp474	10455707	3.69368		Lrit3	10502131	-3.58445		Chtf8	10581499	2.31014		Ptgds2	10545101	-2.03508		Foxe3	10515162	2.98293		Olfr871	10583438	-2.76281
Phrf1	10558847	3.69337		Fam89a	10582694	-3.5824		Tmem125	10515797	2.30987		Nek9	10401637	-2.03452		Serpinh1	10565794	2.98238		Olfr1513	10419709	-2.76224
Impa1	10497285	3.69316		Sh2b3	10533386	-3.58058		Kcnt2	10350438	2.30981		Ebf2	10421026	-2.03441		Cacna1s	10350199	2.98027		Reps1	10361846	-2.76221
EG544707	10364035	3.69217		Anp32e	10494322	-3.57848		Nrtn	10452147	2.30963		Klhl23	10472598	-2.03394		Necab1	10511665	2.97982		Gcc1	10543524	-2.76079
Ak1	10471474	3.69155		Amotl2	10588226	-3.57753		Olfm4	10416689	2.30631		Cenpe	10496204	-2.03315		ENSMUSG00000052368	10478924	2.97872		1110021L09Rik	10362115	-2.75897
Spaca1	10511939	3.69082		Nlrp6	10558742	-3.57566		Med12l	10492231	2.30573		Slc27a5	10560045	-2.03196		RP23-12I24.6	10503876	2.97792		Psma2	10403706	-2.75879
BC031353	10587085	3.69057		Slc46a2	10513406	-3.5746		Entpd3	10590306	2.30514		Neil2	10420736	-2.0311		Gsdmd	10424731	2.97688		Baz1b	10526319	-2.75577
Nap1l1	10366337	3.68916		4930511I11Rik	10443369	-3.57443		2010001K21Rik	10404939	2.30415		Fez1	10584259	-2.03039		2810409K11Rik	10559825	2.97441		Grap	10376796	-2.75528
Ano10	10597883	3.68849		LOC640684	10440734	-3.57415		Fbln1	10425945	2.30404		Vat1	10391454	-2.03018		Spink5	10455395	2.97261		Olfr922	10584462	-2.75136
Apeh	10596857	3.68842		Tgif2	10477924	-3.57382		2010003O02Rik	10503989	2.30345		Olfr1274	10473648	-2.02811		Vill	10590073	2.972		Spink10	10456171	-2.74906
Ahrr	10410604	3.68755		Zbtb44	10584067	-3.57284		Dpf2	10465263	2.30308		Psma6	10395816	-2.02702		Chrm2	10537298	2.97103		1700095B22Rik	10500957	-2.74746
Btnl1	10444320	3.68708		EG245297	10394794	-3.57245		Prmt5	10419759	2.30014		Hnmt	10480459	-2.02555		Rec8	10415332	2.97064		Dhrs9	10472538	-2.74557
Ddx25	10592140	3.68566		Iqce	10535247	-3.56988		rp9	10591806	2.29988		Cx3cr1	10597743	-2.02491		Lass4	10569972	2.97033		Olfr150	10584504	-2.74555
Cyp11a1	10585794	3.68289		Ulk3	10585732	-3.56822		Pim1	10443527	2.2995		Stag2	10599377	-2.02488		1500012F01Rik	10478847	2.96865		Lypla1	10344624	-2.74459
Nlrp1a	10388047	3.68242		Clca2	10502565	-3.5673		H2afv	10384145	2.29899		2310001A20Rik	10488472	-2.02448		Esrp1	10511560	2.96819		Nt5e	10587639	-2.74367
Atg2a	10460787	3.68154		St3gal3	10515574	-3.5657		Acvr1b	10427015	2.29891		Kif15	10590494	-2.02419		Grb10	10384398	2.96776		Nr3c1	10458569	-2.74336
Adcy3	10394258	3.67909		Trpv5	10544365	-3.56537		Mapk1ip1l	10414355	2.297		Tnfrsf26	10569485	-2.02247		Ppm1h	10366712	2.96715		Gtf3c5	10481291	-2.74332
Parp2	10414497	3.67758		Tsga8	10605568	-3.56429		Pfkfb2	10357535	2.29658		Slc38a3	10596718	-2.02158		Myt1	10479698	2.96182		Psd	10468180	-2.74224
Ngdn	10415144	3.67679		Arsj	10495891	-3.5642		Lor	10499870	2.29642		Olfr998	10473450	-2.02029		V1rc7	10538580	2.95741		Rdh13	10559516	-2.74212
Tslp	10454601	3.67612		Tas2r129	10542259	-3.56149		Apc2	10364769	2.29558		Tacc3	10521090	-2.02003		Mapk8ip3	10448765	2.95463		D630037F22Rik	10369176	-2.74073
Fzd4	10554808	3.67576		Syngr3	10448694	-3.55756		Zfp59	10551426	2.29549		Tbc1d15	10372457	-2.01929		Zdhhc24	10460485	2.95444		Phf15	10385747	-2.74014
Klhl29	10399337	3.67255		Trim50	10526339	-3.55689		Ccdc157	10383833	2.29522		Nde1	10433721	-2.01898		Ada	10489391	2.95165		C330027C09Rik	10436106	-2.73978
Bex2	10606835	3.66865		Olfr1097	10484636	-3.55446		B9d2	10551181	2.29517		Tcfec	10543239	-2.01883		Ryr1	10561561	2.9516		Rps6	10604904	-2.73969
Slc28a2	10475487	3.66751		Leprel2	10547869	-3.55181		Ociad1	10522396	2.29446		Utp11l	10516229	-2.0186		Zfyve21	10398751	2.94761		Kif20a	10454709	-2.73796
Cyct	10483851	3.66556		Nr4a2	10482772	-3.55043		Stard13	10535956	2.29403		Ndufa9	10548057	-2.01815		Hrc	10552919	2.94757		Mrps25	10546396	-2.73739
Rell2	10455199	3.66409		Dnm1l	10437992	-3.55006		Cyp51	10527920	2.29267		Pitpnb	10524314	-2.01742		EG637758	10604449	2.94609		Tmed2	10584162	-2.73707
0610009D07Rik	10394353	3.66398		Fads6	10392894	-3.54844		Tap1	10444244	2.29097		Olfr60	10568956	-2.01664		Gpr180	10416989	2.94323		Pramef12	10518201	-2.73547
Acsl5	10464045	3.66366		Khdc1a	10345079	-3.54702		Brap	10525296	2.29051		Pcca	10417183	-2.01654		Rpn1	10539861	2.94314		Slc26a3	10395201	-2.73284
Hhip	10579894	3.66357		Rab36	10363970	-3.54396		Mrpl10	10380732	2.29006		Mgat4b	10375713	-2.01647		Nfkbid	10551891	2.94271		Tram2	10353438	-2.73085
Rab33a	10599530	3.66197		Spnb2	10384885	-3.54337		Prcc	10499265	2.28813		Aqr	10485989	-2.01536		Fbxl14	10541182	2.94195		Gm7191	10580984	-2.73042
Prpsap2	10386775	3.65895		Snord8	10419674	-3.54314		5430407P10Rik	10479925	2.28694		Cotl1	10582162	-2.01449		Prpf40b	10426722	2.94159		Tmem77	10495163	-2.73023
Stil	10507112	3.6585		OTTMUSG00000011097	10518346	-3.54314		Ptprh	10559590	2.28653		Maf1	10424833	-2.01227		Cabp2	10460303	2.941		V1re8	10442151	-2.72909
Hdlbp	10356800	3.65741		Olfr1404	10351863	-3.54071		Itpr2	10549282	2.28613		Scfd1	10395628	-2.01223		4930547C10Rik	10504983	2.93941		Hint3	10368527	-2.72767
1810063B07Rik	10417794	3.65713		Calm2	10599461	-3.54066		Slc11a2	10432573	2.2861		Anapc10	10573048	-2.01221		EG634650	10532019	2.93724		Gdf9	10376004	-2.72676
Cdh2	10457644	3.65557		Pkp3	10558795	-3.54051		2700038C09Rik	10599576	2.28583		ENSMUSG00000074919	10364237	-2.01183		Fam83h	10429691	2.93269		Spag9	10380341	-2.72658
ENSMUSG00000073395	10451052	3.65471		Pten	10462521	-3.54		Fam108a	10370914	2.28582		BC023829	10604922	-2.0111		Rgs4	10359908	2.93215		Dsn1	10489078	-2.72657
Hao1	10488010	3.65278		EG622794	10436766	-3.53989		Hmgn3	10595371	2.28519		Pstpip2	10456904	-2.01058		4921504E06Rik	10480360	2.93112		Muc13	10435288	-2.72578
Trappc10	10370446	3.65002		Sned1	10348739	-3.53973		6430628N08Rik	10507236	2.28465		Pla2g15	10574976	-2.00898		Acadvl	10387768	2.93042		Ccnb1	10562637	-2.72517
Atp5g3	10483756	3.64948		Pdzd3	10592752	-3.53751		Map3k14	10391870	2.28427		Tacc2	10558090	-2.00877		Olfr291	10554714	2.93038		Ctr9	10556321	-2.7231
Abcc12	10580418	3.64851		9930005F22Rik	10511309	-3.53431		Slc46a3	10535841	2.28321		4930402K13Rik	10598571	-2.00594		Pik3ca	10491331	2.93025		ENSMUSG00000072956	10545768	-2.72232
Wdr47	10495343	3.64781		Trav7d-2	10414920	-3.53296		Sfrs2	10393395	2.28302		Shc4	10487139	-2.00566		Olfr1133	10484681	2.9294		Prr13	10427235	-2.72185
C8g	10480751	3.64748		Gstm1	10501229	-3.53234		Plp2	10603346	2.28218		Mmp14	10415052	-2.00566		Angptl7	10518526	2.92922		Darc	10360344	-2.72069
E130120F12Rik	10410302	3.64735		ENSMUSG00000053839	10520696	-3.53219		Rnf144a	10399696	2.28165		Acsm5	10556701	-2.00563		4933430H15Rik	10499200	2.92859		Smcr7l	10425357	-2.7165
Cpt1b	10431564	3.64593		Thoc6	10448292	-3.5278		4833412L08Rik	10407209	2.28104		Auh	10409265	-2.0037		Btn2a2	10408185	2.92793		LOC641089	10403057	-2.71625
Spg20	10492102	3.64557		Pax8	10480477	-3.52653		EG628189	10578021	2.28		Wnt5a	10413482	-2.00356		Maz	10568139	2.92791		Kif14	10350329	-2.71184
Prkrip1	10534575	3.64407		EG244229	10568861	-3.5254		Trim58	10376396	2.27914		Wdr5b	10435487	-2.00286		Defa23	10570676	2.92717		LOC636082	10605512	-2.71109
Tmem107	10377418	3.64078		Dzip3	10439798	-3.52524		OTTMUSG00000002203	10381109	2.27823		Rbm8a	10494452	-2.00282		Rybp	10546706	2.92682		Ifi204	10360382	-2.71077
Mrps23	10380238	3.64077		Ltb4r2	10415388	-3.52518		Rab8a	10572757	2.27375		Prm1	10437684	-2.00244		Gpr113	10528951	2.92634		ENSMUSG00000009116	10364153	-2.71025
Icam4	10583529	3.63916		AA986860	10349562	-3.52427		Dusp6	10366043	2.27351		Dnajb6	10585533	-2.00238		Baalc	10423821	2.92587		Slc25a3	10371877	-2.70948
2310036O22Rik	10573515	3.63824		2310010M20Rik	10435019	-3.52411		Olfr448	10537803	2.27315		Olfr558	10555736	-2.00161		Stk24	10422396	2.92527		Acat3	10447885	-2.70942
A830093I24Rik	10399299	3.63715		Kctd12	10422059	-3.52238		Zfp385b	10484237	2.27277		Cnpy4	10526772	-2.00015		Oaf	10592719	2.9228		AI480653	10438975	-2.70896
Helt	10578547	3.63622		Sycn	10551531	-3.52209		Cradd	10372060	2.27197		Gm4471	10445941	-1.99703		V1rc6	10538582	2.9221		1700069L16Rik	10532716	-2.70786
Eef1b2	10346867	3.63606		Mrvi1	10566943	-3.52141		Ckmt1	10475324	2.27126		Zfp131	10412421	-1.99556		C130026L21Rik	10524331	2.92185		Dnmbp	10467871	-2.7075
Tyk2	10591446	3.63539		4933407I18Rik	10585940	-3.52066		Tomm6	10451591	2.27049		Olfr547	10555716	-1.99309		Mrps6	10436941	2.92016		EG668809	10495867	-2.7073
Lpin1	10399478	3.63367		1700007N14Rik	10415897	-3.51952		Olfr633	10555834	2.2668		Dkc1	10600485	-1.9922		4930415L06Rik	10605648	2.91967		Pilra	10534927	-2.70632
Idi1	10482762	3.63111		Ash1l	10493347	-3.51944		Fam168b	10353794	2.26616		Nusap1	10474984	-1.99174		Zfpm1	10576090	2.9177		Slc35c1	10485183	-2.70414
Intu	10491753	3.63039		Prkg1	10467013	-3.5193		Ttpal	10478401	2.26608		Clcn1	10537742	-1.99124		Pom121l2	10403973	2.91594		Mis12	10378024	-2.70311
Treml4	10445758	3.62968		Cntnap2	10537851	-3.51923		1700001C02Rik	10520501	2.26467		D19Ertd737e	10468802	-1.9912		Gale	10509147	2.91512		Acer3	10565712	-2.70291
Btn1a1	10408175	3.62685		Tas1r3	10519211	-3.51905		ENSMUSG00000073752	10516776	2.26339		Cd24a	10362896	-1.99051		1110020P15Rik	10383887	2.91484		7120482A17Rik	10429460	-2.69938
EG624341	10591200	3.62315		Amhr2	10427222	-3.51722		Car5a	10582287	2.26108		Agrn	10519270	-1.98922		Mrps28	10497209	2.91382		Otub1	10465625	-2.69624
Hspb11	10506658	3.62152		ENSMUSG00000074696	10497323	-3.51694		Art4	10548875	2.25935		Osbp	10461690	-1.98746		4930403L05Rik	10603738	2.9093		Lamb1-1	10395163	-2.69518
Vdac2	10531286	3.62086		Sdcbp	10503134	-3.51654		Kcng2	10459927	2.2593		Numb	10401382	-1.98712		Bloc1s1	10457924	2.90903		Tet2	10502284	-2.69417
Rpl4	10586157	3.6204		1700013G24Rik	10509277	-3.51553		Neurl3	10353844	2.25882		Chaf1b	10437040	-1.98673		Apba2	10553917	2.90755		Zc3hav1l	10544084	-2.69341
Prcc	10499265	3.61818		Sntg1	10352980	-3.5129		Mrpl39	10440471	2.25815		Nr0b1	10600707	-1.98658		4930404A10Rik	10376127	2.90691		Nphs2	10350806	-2.69293
Dhrs1	10420155	3.61759		Myo7a	10565634	-3.51219		EG231836	10526997	2.25802		Mospd2	10607774	-1.98357		Serpina3m	10398069	2.90666		Edem3	10350646	-2.69147
Ccndbp1	10475264	3.61754		Chi3l1	10349968	-3.50974		St3gal1	10429176	2.25683		Ip6k3	10449320	-1.98269		Fam48b1	10605726	2.90587		Plekha1	10558134	-2.68892
EG433632	10494592	3.61749		Aftph	10384555	-3.508		Cxcr6	10590623	2.25589		Lss	10364194	-1.98218		Kif1c	10377982	2.90534		Ranbp3l	10422946	-2.6884
EG435554	10453792	3.61495		Unc93a	10447904	-3.50498		Dpm3	10493490	2.25398		Dlx1	10472809	-1.98188		Trim67	10576495	2.90521		Pltp	10489569	-2.68805
Pja1	10605919	3.61401		Zfhx4	10490777	-3.50385		Taf12	10508711	2.25334		LOC665703	10408127	-1.98027		Ccdc157	10383833	2.90463		Fgf2	10491699	-2.68494
Mcrs1	10510125	3.61049		Six1	10400967	-3.50262		Uba52	10603009	2.25216		Tspyl4	10362490	-1.97737		Olfr823	10373668	2.90186		Krtap16-9	10440677	-2.68459
Spata21	10509910	3.61006		Olfr1415	10356673	-3.50139		C330007P06Rik	10604046	2.2511		Anln	10591781	-1.97699		Cd109	10587383	2.90157		AY026312	10440700	-2.68227
Gtf2b	10496621	3.60858		Th	10569370	-3.50071		Athl1	10558754	2.25107		Fhdc1	10499062	-1.97696		Htr1d	10509238	2.89966		Snord61	10604743	-2.68144
Lsm1	10571048	3.60828		Lmtk3	10553115	-3.50066		Prkag2	10528702	2.2504		Snord37	10365003	-1.9753		Atp12a	10415446	2.89591		Olfr1454	10461792	-2.68005
Sdhb	10509858	3.60796		Fam131b	10544406	-3.49958		Trim34	10555862	2.24996		Gtpbp8	10439634	-1.97375		Lipg	10459772	2.89571		4932438H23Rik	10440903	-2.68001
6330403K07Rik	10388042	3.60671		Disc1	10576538	-3.49892		OTTMUSG00000021609	10348924	2.24984		Hagh	10442616	-1.97338		Crygb	10355199	2.89522		Tcf12	10594879	-2.67982
Polr2l	10569200	3.60467		AY036118	10450920	-3.49813		Zfp771	10557587	2.24818		Nsf	10391963	-1.97326		Olfr827	10373678	2.89447		Olfr836	10583388	-2.67922
Padi6	10517774	3.60459		Rfwd2	10606160	-3.49811		Eng	10471486	2.24805		G6pdx	10605338	-1.97283		Txndc2	10452480	2.89418		Tmem222	10517028	-2.67872
Palld	10578829	3.60398		Slc22a12	10465411	-3.49712		Ifi44	10502791	2.24761		Nek5	10577471	-1.9719		Cdk3	10382779	2.89302		Rnf141	10566926	-2.67857
BC018465	10477512	3.60364		Nmur1	10356335	-3.49676		Speer4f	10519879	2.24723		Lmf2	10431528	-1.97171		Slc15a5	10548931	2.89299		Bcl10	10496737	-2.67639
Olfr532	10568962	3.602		Spinlw1	10489506	-3.49671		Wdr78	10514713	2.24717		OTTMUSG00000016887	10598596	-1.96965		Wdr20b	10396055	2.89273		Ckap2	10577508	-2.67625
Ndufs6	10410508	3.60148		Ppp1r12a	10366238	-3.49398		LOC546695	10446613	2.24709		Golga2	10471360	-1.96922		Bdh1	10434934	2.89132		Mrvi1	10566943	-2.6757
Zc3h14	10397666	3.60113		Snrnp70	10563260	-3.49131		Rpl32	10547068	2.24683		Yipf3	10445496	-1.96865		V1rc26	10544999	2.88976		Hsbp1	10575861	-2.67551
Sf3a3	10507914	3.59927		Tff3	10449657	-3.49043		Krt18	10427075	2.2461		Tfpi2	10542953	-1.96645		Dub2	10555789	2.88942		Rab14	10482017	-2.67549
Surf6	10481122	3.59779		Tff1	10449666	-3.49012		Commd4	10593903	2.24608		Cbara1	10363379	-1.96586		Fxyd2	10584891	2.88828		Parp11	10542040	-2.67467
EG623849 // EG623849	10528154	3.59706		Qser1	10485622	-3.48867		Olfr96	10445117	2.24369		Olfr23	10378413	-1.96513		Spz1	10411078	2.88678		Mapksp1	10566405	-2.67348
Tmem69	10515326	3.59651		4930544M13Rik	10407300	-3.4859		Kif21a	10431659	2.24197		Tmem120a	10534504	-1.96455		Dido1	10490510	2.88426		Rnf5	10450206	-2.67288
Elavl4	10515095	3.59629		Edn3	10479165	-3.48533		Apol7a	10430166	2.24181		Rbm34	10582823	-1.9643		Zfp37	10513544	2.88396		Slc37a3	10544171	-2.67188
Atp5e	10490221	3.59571		1700125F08Rik	10369409	-3.4842		Ube2b	10385761	2.24176		Rdh5	10373588	-1.96213		Mitf	10540265	2.88314		Scyl2	10371811	-2.67158
3632451O06Rik	10419416	3.59319		Zfp654	10440292	-3.48274		Fcho1	10579609	2.24117		OTTMUSG00000009877	10517568	-1.96085		Col4a3	10347807	2.88173		Gc	10531149	-2.67155
P2rx4	10525439	3.59239		Pbx3	10481857	-3.48262		Tusc4	10588642	2.24052		Adad2	10575909	-1.96049		Paf1	10551496	2.8803		Rab30	10554938	-2.67059
Rpl14	10590320	3.5894		Hnrnpa3	10600593	-3.4823		Ctnnbip1	10510473	2.24018		OTTMUSG00000015606	10476617	-1.95915		Kcnh2	10528548	2.88007		Id2	10399691	-2.66947
Poldip2	10379204	3.58902		Fam169a	10406782	-3.48103		Atf4	10425364	2.24015		Psmd3	10380986	-1.95844		Wdr34	10481383	2.87932		Lrat	10498978	-2.66943
U2af1l4	10551981	3.58902		Arntl2	10542764	-3.48089		Nisch	10418578	2.23978		Pcdhb18	10455118	-1.95674		G370120E05Rik	10352292	2.87909		Rab1	10374466	-2.66943
Ascl2	10569385	3.58847		1700071K01Rik	10389062	-3.48034		4933411K20Rik	10571647	2.23862		Tac2	10367024	-1.95638		Slc35f3	10576586	2.87898		Rpusd2	10474870	-2.66893
1700054F22Rik	10504992	3.58769		Spen	10517948	-3.48022		Prnp	10476314	2.23808		1810043G02Rik	10364338	-1.95554		EG384356	10544702	2.8784		Myo7a	10565634	-2.66856
Rpl32 // Rpl32 // Rpl32	10547068	3.58744		Camk2n2	10438527	-3.47924		Cish	10588577	2.23633		Hnrnph2	10601760	-1.95505		Krtap1-3	10390907	2.87819		Gm131	10501074	-2.66821
Ly96	10344966	3.58481		Ctxn3	10455863	-3.47377		Twist1	10395320	2.23594		Sco1	10377010	-1.95505		Dpp6	10520318	2.87785		EG245405	10604342	-2.66803
Sumo3	10364287	3.58262		ENSMUSG00000074919	10364237	-3.47351		Scand3	10526098	2.2349		Slc6a9	10507500	-1.95428		ENSMUSG00000033219	10528177	2.87677		Cpsf2	10397818	-2.66715
Arr3	10600994	3.58244		Whrn	10513692	-3.47245		1700047I17Rik1	10400393	2.23481		Hsd3b6	10500559	-1.95371		Tacr2	10363551	2.87618		Atad3a	10519183	-2.66663
1700047I17Rik1	10400393	3.58188		Olfr1265	10473641	-3.47164		Lamb3	10352838	2.23291		Gorasp2	10483561	-1.95357		Lsm4	10572449	2.87564		Heatr1	10403511	-2.6663
Ino80e	10568065	3.58141		Fam108b	10461999	-3.47113		Prtg	10586971	2.23196		Wfdc16	10489522	-1.9521		Mill1	10550487	2.87559		Bpnt1	10352503	-2.66376
LOC100042621	10414900	3.58062		Cdcp2	10506638	-3.47012		Frem2	10498119	2.23152		App	10440491	-1.9518		Trp63	10434815	2.87523		Tex18	10365535	-2.66316
Dapk2	10586491	3.57867		BC027582	10500804	-3.46862		Cnot6l	10531529	2.23142		Olfr1093	10473507	-1.95143		Kank1	10462195	2.87385		OTTMUSG00000008364	10552118	-2.66299
Csf2rb2	10430302	3.57772		Npb	10383429	-3.46848		4833418N17Rik	10554586	2.23133		Commd9	10474123	-1.95092		Nme1	10389865	2.8734		Zbtb38	10595831	-2.66278
Bax	10563303	3.57667		Gpr141	10407985	-3.46799		Egr3	10416251	2.23102		Cit	10524790	-1.9507		BC031181	10456723	2.87327		Rbm43	10482509	-2.65919
Tmem45a	10440019	3.57652		C230062I16Rik	10551801	-3.4666		Abpg	10562308	2.23079		Gsr	10571274	-1.95067		C1s	10547740	2.87164		Chst14	10474860	-2.65692
Enoph1	10523518	3.5761		Tspan32	10559248	-3.4639		Tgfbr2	10597518	2.22991		A630095E13Rik	10592196	-1.94867		Mkx	10457323	2.86909		Actbl2	10407141	-2.65681
Nsmce4a	10568480	3.57551		Olfr1335	10515828	-3.46297		Fam98b	10474689	2.22956		1110020G09Rik	10422962	-1.94852		2310030G06Rik	10593413	2.86908		EG665751	10583416	-2.65664
Hist1h1e	10408212	3.57545		Rp1l1	10415890	-3.46255		Il11	10559667	2.22891		Fabp6	10385337	-1.94824		Nrcam	10395553	2.86853		Smc1a	10602599	-2.65586
Haus7	10605055	3.57407		Grm5	10554778	-3.46221		EG245174	10476939	2.22821		Pnldc1	10447860	-1.94816		Lhx5	10525069	2.86781		Kpna3	10420637	-2.65497
Taar3	10362152	3.57378		Il28a	10561474	-3.46064		Txnl4a	10456995	2.22793		Acaa2	10456699	-1.94801		Csnk1e	10430519	2.86662		Chi3l3	10501020	-2.65483
Rtn1	10400926	3.57331		ENSMUSG00000056133	10447634	-3.46019		Hgd	10435626	2.22585		Olfr1259	10484856	-1.94795		EG665716	10546337	2.86651		Asprv1	10539739	-2.65349
Prkaca	10573266	3.57301		V1rc15	10545111	-3.45609		Arl5b	10469425	2.22485		Dstn	10476648	-1.94663		D8Ertd738e	10580155	2.86601		Gyltl1b	10485131	-2.65189
Lta4h	10365749	3.56902		Zbtb7a	10465740	-3.45578		Arhgef1	10551030	2.22471		Sec14l2	10383819	-1.94291		Tmem47	10600597	2.86552		Cngb3	10503464	-2.64793
Apip	10474159	3.56895		EG668184	10459802	-3.45487		Tcfeb	10445729	2.22266		Otop1	10521574	-1.94244		Acy3	10460263	2.8649		Il31ra	10412126	-2.64739
Mcee	10553913	3.56854		Pdlim2	10421258	-3.45474		Zbtb26	10482172	2.22173		Etfdh	10498837	-1.94196		Ptprg	10412667	2.86482		Hltf	10491014	-2.64717
Rfc3	10535979	3.56489		Tbl1xr1	10491056	-3.45379		Impa2	10456383	2.22157		Gps2	10377652	-1.93967		Olfr61	10558661	2.86454		Fmnl2	10472097	-2.64708
Fahd2a	10487382	3.56254		Secisbp2l	10487154	-3.45233		Stoml1	10585825	2.22108		Insig1	10520362	-1.93911		Cish	10588577	2.86399		Paip2	10454831	-2.64624
Zbbx	10498720	3.56184		Taar4	10362154	-3.45056		Taar7f	10362166	2.22065		ENSMUSG00000072593	10379838	-1.93907		Dnm1	10481592	2.86371		Nrn1	10408689	-2.64597
Pole4	10545583	3.5615		Trerf1	10445640	-3.44928		1110051M20Rik	10485013	2.21998		Tdpoz1	10499975	-1.93834		Lrp2	10483439	2.86276		Mcph1	10570556	-2.64584
Olfr190	10440156	3.56069		Arx	10600755	-3.4487		Dkkl1	10563170	2.21998		Rsph10b2	10527285	-1.93556		Homer3	10572345	2.86167		Ttc25	10381140	-2.64574
Hmga2	10372796	3.56031		Scamp1	10411156	-3.44687		Slc11a1	10347335	2.21882		Gstm4	10501235	-1.93518		Gas2l1	10383932	2.86082		Ceacam19	10560702	-2.64461
1700021K19Rik	10439092	3.55885		EG627543	10439891	-3.44606		Gbas	10526055	2.21859		Kcne3	10555297	-1.93459		LOC625574	10505908	2.8606		ENSMUSG00000063025	10352792	-2.64069
4932417H02Rik	10383245	3.55834		Mrgprb5	10563745	-3.446		Ndufc1	10498058	2.21841		Rps6kb1	10389484	-1.93284		Spin2	10602722	2.8604		Mtmr11	10494351	-2.64016
Tagap	10441601	3.55821		1700108M19Rik	10400045	-3.44348		Srxn1	10477061	2.21726		OTTMUSG00000016364	10547054	-1.93157		Stac3	10366938	2.86015		Il18r1	10345807	-2.63897
Cdh9	10423230	3.55717		Stom	10482030	-3.44339		Myoc	10351131	2.21711		ENSMUSG00000074077	10554059	-1.93087		Gm97	10461644	2.85893		Brd4	10449815	-2.63812
D2Bwg1335e	10480950	3.55694		Mnt	10378497	-3.44267		Zkscan1	10526726	2.21673		Slit2	10521759	-1.93086		Kctd4	10416505	2.85883		Papd4	10521966	-2.63802
4930519F16Rik	10606163	3.5562		Cecr5	10547513	-3.4402		Fbxo39	10378078	2.21669		Prssl1	10370644	-1.93058		1700024P16Rik	10506470	2.85734		Lhx3	10480912	-2.63778
Nup88	10387992	3.55616		D6Ertd474e	10542686	-3.43911		Fam62b	10399061	2.21595		Itpk1	10402283	-1.93016		Ormdl3	10390685	2.85731		Emr4	10445953	-2.63773
Xist	10606178	3.5551		Umod	10567380	-3.43687		Mdk	10485070	2.21413		Zfp74	10561799	-1.92864		Clec4f	10545731	2.85719		Adamtsl3	10554599	-2.63611
Stag3	10526797	3.55061		Kcnk16	10417807	-3.43566		Krt72	10432820	2.21384		Aarsd1	10391431	-1.92844		Jub	10419790	2.85508		A430084P05Rik	10387985	-2.6356
Tnfrsf25	10510668	3.54942		Fam167b	10516637	-3.43507		Ascc2	10373924	2.21334		Trnau1ap	10516884	-1.92831		Gm9697	10434556	2.85322		Pgm3	10595466	-2.63398
Nup205	10537246	3.54651		Nkain4	10490551	-3.43465		Trim25	10380260	2.21308		Arf1	10456974	-1.92811		Hbb-b1	10566258	2.85215		Fhl5	10511835	-2.63377
Mrp63	10415645	3.54498		Abcb1a	10519527	-3.4338		Zfp667	10549842	2.2123		Btla	10435982	-1.92724		Erlin2	10571114	2.8515		Slc5a8	10365640	-2.63355
Ern1	10392183	3.54483		F830115B05Rik	10532678	-3.43375		Tiaf2	10423379	2.21206		ENSMUSG00000074252	10572525	-1.92627		Icam4	10583529	2.85147		Ap2b1	10379654	-2.63201
Akt2	10551393	3.54481		ENSMUSG00000068924	10499429	-3.43304		Abat	10433445	2.21164		A530032D15Rik	10356271	-1.92617		Rps15	10541520	2.84998		Ddx39	10573217	-2.63072
Hhla1	10429064	3.54283		Acsm5	10556701	-3.43005		St6gal1	10438702	2.20973		ENSMUSG00000074917	10408935	-1.92561		4833413D08Rik	10477528	2.84941		5031414D18Rik	10416423	-2.62985
Mlf1	10492469	3.53969		Olfr920	10584458	-3.42806		Bdh2	10496251	2.2093		Muc2	10558992	-1.92497		Unkl	10453736	2.8471		Arid5b	10369792	-2.62938
Ddx18	10546805	3.53891		Mtap1b	10411519	-3.42792		Prkcq	10469255	2.20864		Myl7	10384044	-1.92475		Mobp	10590269	2.8461		I830134H01Rik	10467315	-2.62826
Hrsp12	10428081	3.53867		6720401G13Rik	10604505	-3.42571		Nr4a1	10427035	2.20812		Gm732	10606386	-1.92407		Ldhd	10581865	2.84594		Olfr1164	10484716	-2.62815
Mdk	10485070	3.53779		ENSMUSG00000058380	10445877	-3.4208		Nanp	10488550	2.20777		Eaf1	10413795	-1.92405		Uqcrq	10385818	2.84556		Pole	10524169	-2.62779
4833420G17Rik	10407370	3.53687		Slc27a4	10470751	-3.4204		Cyp2r1	10567086	2.20666		Npas4	10464905	-1.9235		Mkks	10488048	2.84524		LOC674623	10464359	-2.6273
Ccl27a	10512315	3.53616		Ctrc	10518059	-3.41992		2310034G01Rik	10468213	2.20653		Cnpy1	10528864	-1.92176		Gimap1	10538138	2.84233		Rergl	10548951	-2.62655
Itpa	10485340	3.53492		Ptgds2	10545101	-3.41704		R3hdm1	10349480	2.206		1700018L24Rik	10570168	-1.92107		EG627681	10592248	2.84129		Olfr46	10558659	-2.6254
Ssna1	10480672	3.53014		Gtf2a1	10401882	-3.4164		OTTMUSG00000003802	10382927	2.20466		2310021P13Rik	10413018	-1.92042		Slc25a4	10578539	2.84098		Acta2	10467124	-2.62416
Prdx1	10507328	3.52874		Rab27a	10587023	-3.41563		D11Bwg0517e	10393594	2.20391		RP23-394O9.3	10393569	-1.9203		Nol3	10574676	2.84056		Myl3	10589602	-2.62388
2310007F21Rik	10586130	3.52844		Sh3gl2	10505705	-3.41463		4930431F12Rik	10521702	2.20385		Tiam1	10440738	-1.91776		6030498E09Rik	10599342	2.83951		Dock9	10422436	-2.62156
Ebp	10603485	3.52836		Ttc9b	10551401	-3.4146		Nsmce2	10424363	2.20335		Itgae	10378286	-1.91759		Smcr7	10376715	2.83808		OTTMUSG00000010099	10508770	-2.62115
Reg3b	10539179	3.52813		Ccdc33	10594015	-3.41448		ENSMUSG00000074237	10495972	2.20324		Adipor1	10350015	-1.91649		Rps21	10479362	2.83802		Olfr1270	10484872	-2.6205
Pold4	10460392	3.52764		Asb18	10356489	-3.41428		Drd4	10558866	2.19716		F11	10578427	-1.91645		Scap	10597134	2.83786		Olfr640	10566294	-2.62019
Cyp2c50	10463051	3.5269		Olfr493	10566690	-3.41278		Zcchc10	10375975	2.19692		2700078K21Rik	10569273	-1.91642		Srcrb4d	10534537	2.83684		EG434275	10569998	-2.61967
Pik3cd	10518686	3.52536		Dazap1	10364752	-3.41188		Aox4	10346448	2.19675		Dynlrb2	10575725	-1.91555		Snapc3	10505630	2.83561		EG546723	10467003	-2.61849
Cdc20b	10407262	3.52425		C230021P08Rik	10432473	-3.41141		Ap2a2	10558971	2.19652		Sdha	10410625	-1.91542		Gpr15	10440131	2.83305		Kif18a	10474381	-2.61817
5133400G04Rik	10458285	3.52299		Tbc1d10a	10373890	-3.41076		V165-D-J-C mu	10403031	2.19429		Psmc1	10439878	-1.91327		Bend6	10353775	2.83164		Atp1b3	10598994	-2.61738
I830012O16Rik	10462621	3.52245		Gm1587	10421717	-3.41051		Eif3i	10516640	2.19039		B4galt4	10435724	-1.91254		Vmn2r10	10532270	2.8304		1810033B17Rik	10569877	-2.61567
Map2k6	10382300	3.52209		ENSMUSG00000073682	10519138	-3.41022		Phyhd1	10470959	2.18996		EG244595	10580593	-1.91242		Tnfrsf13b	10376755	2.82749		Eif4g2	10566966	-2.61553
Mthfd1	10396610	3.52172		1110008J03Rik	10533176	-3.40712		Abcg1	10443730	2.18931		Sept5	10438358	-1.91229		Fam5b	10359255	2.8274		Olfr1370	10407995	-2.61532
Cacnb1	10390542	3.51998		Zmat4	10570963	-3.40658		Ttc37	10406287	2.18897		Olfr1265	10473641	-1.91164		2310007H09Rik	10558265	2.82636		Naglu	10381211	-2.61489
Ehd4	10486396	3.51916		Trim25	10380260	-3.40532		Tbc1d10c	10464647	2.18811		C1qtnf9	10415737	-1.91118		4833424O15Rik	10495613	2.82592		Ociad2	10530615	-2.61252
Tceal6	10606789	3.51815		Mylip	10404874	-3.40515		Six6os1	10400948	2.18741		Eif3l	10425226	-1.90959		Ucma	10469058	2.8259		Aph1c	10594638	-2.61239
Msra	10420811	3.51807		Myod1	10553256	-3.4044		Micall1	10425240	2.18733		Ppat	10530806	-1.90817		ENSMUSG00000075550	10416153	2.82512		EG433024	10439845	-2.61081
Tsc2	10448631	3.51784		Il17b	10456136	-3.4038		1700072H12Rik	10375127	2.18561		Zfp473	10562897	-1.90768		F830223B06Rik	10553401	2.82475		Cul4b	10604199	-2.6096
Olfr726	10419438	3.51599		EG382919	10421212	-3.40284		Olfr790	10367503	2.18505		Plxnb1	10589368	-1.90741		EG546272	10603914	2.8245		Cobll1	10483178	-2.60834

## Sheet: Young HSC GSEA
Name	Net Enrichment Score	Nominal P-value	FDR	Contributing Genes
REACTOME_CELL_CYCLE_CHECKPOINTS	-3.38863	0	0	MCM6, MCM8, CDC25A, NUP133, SEH1L, RFC2, CDK2, PSMC2, RFC4, PPP2R1B, PSMB5, MCM5, PSMB7, MCM4, RAD1, CENPP, DNA2, PSMD12, MCM7, ERCC6L, SPC25, PSMC4, CCNE2, PSMD6, SEM1, CDC7, CENPO, PSMA7, RPA3, CDC26, PSMD1, PSMC6, SKA1, RFC3, COP1, ANAPC10, TP53
REACTOME_METABOLISM_OF_RNA	-3.19181	0	0	CHTOP, SNRPA1, NUP133, POLR2B, NDC1, CWC15, WDR12, POLR2D, SEH1L, POP1, PSMC2, IGF2BP2, WDR36, GTF2F2, PSMB5, QTRT1, EXOSC5, PSMB7, SLBP, WDR75, HNRNPC, MTREX, PPIE, NOP10, NUP35, PSMD12, TP53RK, PSMC4, PSMD6, SEM1, DDX39B, RBM17, NOP56, CPSF1, PSMA7, CDC40, PPIH, SNRNP25, EMG1, PSMD1, PSMC6, FYTTD1, DUS2, SF3B6, RPL4, PRCC, LSM1, POLR2L, SF3A3, RPL14, U2AF1L4, NUP88, NUP205, HNRNPA3, SNRNP70, TH…
REACTOME_CELL_CYCLE	-3.14142	0	0	MCM6, MCM8, RBBP7, CDC25A, NUP133, HDAC1, POLR2B, GMNN, WRAP53, NDC1, POLE2, POLR2D, SYCP3, SEH1L, RFC2, CDK2, PSMC2, RFC4, PPP2R1B, POLA2, PSMB5, MCM5, TUBGCP2, PSMB7, MCM4, CDCA5, RAD1, CENPP, DNA2, NOP10, NUP35, PSMD12, GINS4, MCM7, ERCC6L, SPC25, PSMC4, CCNE2, HDAC8, PSMD6, SEM1, CDC7, CENPO, TUBB2A, PSMA7, TUBA3D, RPA3, CDC26, PSMD1, PSMC6, SKA1, MND1, LPIN1, POLR2L, HAUS7, PRKACA, RFC3, POL…
REACTOME_SEPARATION_OF_SISTER_CHROMATIDS	-3.02621	0	0	NUP133, SEH1L, PSMC2, PPP2R1B, PSMB5, PSMB7, CDCA5, CENPP, PSMD12, ERCC6L, SPC25, PSMC4, HDAC8, PSMD6, SEM1, CENPO, TUBB2A, PSMA7, TUBA3D, CDC26, PSMD1, PSMC6, SKA1, ANAPC10, SMC1A
REACTOME_TRANSLATION	-2.9941	0	0	MRPS15, TSFM, TUFM, FARSB, MRPL35, MRPL13, EIF3G, EIF2B1, RPN2, MRPS21, SARS1, MRPL2, PARS2, MRPL20, MRPS33, VARS1, GFM1, SPCS3, MRPL50, GADD45GIP1, MRPL4, SRPRB, MRPS7, MRPL37, APEH, MRPS23, EEF1B2, RPL4, RPL14, MRPL57, ERAL1
REACTOME_G2_M_CHECKPOINTS	-2.92778	0	0
REACTOME_CELL_CYCLE_MITOTIC	-2.91966	0	0
REACTOME_S_PHASE	-2.91042	0	0
REACTOME_DNA_REPAIR	-2.90331	0	0
REACTOME_DNA_REPLICATION	-2.89348	0	0
REACTOME_DNA_REPLICATION_PRE_INITIATION	-2.86342	0	0
REACTOME_MITOTIC_G1_PHASE_AND_G1_S_TRANSITION	-2.8348	0	0
REACTOME_SWITCHING_OF_ORIGINS_TO_A_POST_REPLICATIVE_STATE	-2.83472	0	0
REACTOME_ORC1_REMOVAL_FROM_CHROMATIN	-2.77845	0	9.77444e-05
REACTOME_MITOTIC_METAPHASE_AND_ANAPHASE	-2.66832	0	0.000286572
REACTOME_ASSEMBLY_OF_THE_PRE_REPLICATIVE_COMPLEX	-2.6398	0	0.000268661
REACTOME_THE_CITRIC_ACID_TCA_CYCLE_AND_RESPIRATORY_ELECTRON_TRANSPORT	-2.57899	0	0.000335529
REACTOME_NEDDYLATION	-2.41106	0	0.00144585
REACTOME_TRANSCRIPTIONAL_REGULATION_BY_RUNX1	-2.39216	0	0.00166824
REACTOME_NUCLEOTIDE_EXCISION_REPAIR	-2.38536	0	0.00178411
REACTOME_HOST_INTERACTIONS_OF_HIV_FACTORS	-2.36789	0	0.00212271
REACTOME_RESPIRATORY_ELECTRON_TRANSPORT_ATP_SYNTHESIS_BY_CHEMIOSMOTIC_COUPLING_AND_HEAT_PRODUCTION_BY_UNCOUPLING_PROTEINS	-2.36472	0	0.00208606
REACTOME_HIV_INFECTION	-2.34823	0	0.00237411
REACTOME_CHROMOSOME_MAINTENANCE	-2.29257	0.00199203	0.00349787
REACTOME_ANTIGEN_PROCESSING_CROSS_PRESENTATION	-2.27157	0	0.00389105
REACTOME_MITOCHONDRIAL_TRANSLATION	-2.24138	0	0.0050063
REACTOME_PCP_CE_PATHWAY	-2.23188	0	0.00503397
REACTOME_M_PHASE	-2.16223	0.00198807	0.00694362
REACTOME_G1_S_DNA_DAMAGE_CHECKPOINTS	-2.07035	0	0.0122215
REACTOME_TRANSCRIPTION_COUPLED_NUCLEOTIDE_EXCISION_REPAIR_TC_NER	-2.06461	0.0126582	0.0121137
REACTOME_PROCESSING_OF_CAPPED_INTRON_CONTAINING_PRE_MRNA	-2.02605	0.00753296	0.0145515
REACTOME_GLOBAL_GENOME_NUCLEOTIDE_EXCISION_REPAIR_GG_NER_	-2.02333	0.00598802	0.0143276
REACTOME_BETA_CATENIN_INDEPENDENT_WNT_SIGNALING	-2.02267	0.00588235	0.0138935
REACTOME_ORGANELLE_BIOGENESIS_AND_MAINTENANCE	-1.97536	0.00575816	0.0187404
REACTOME_TCR_SIGNALING	-1.91689	0.0179283	0.0260213
REACTOME_HEDGEHOG_OFF_STATE	-1.91457	0.0123967	0.025592
REACTOME_METABOLISM_OF_AMINO_ACIDS_AND_DERIVATIVES	-1.89163	0.012	0.027988
REACTOME_METABOLISM_OF_LIPIDS	-1.82035	0.0173077	0.0405985
REACTOME_MITOTIC_G2_G2_M_PHASES	-1.81326	0.0146444	0.0414577
REACTOME_DNA_DOUBLE_STRAND_BREAK_REPAIR	-1.80585	0.0252632	0.0418923
REACTOME_FC_EPSILON_RECEPTOR_FCERI_SIGNALING	-1.79848	0.0187891	0.0425893
REACTOME_C_TYPE_LECTIN_RECEPTORS_CLRS_	-1.79659	0.0083682	0.0418909
REACTOME_THE_ROLE_OF_GTSE1_IN_G2_M_PROGRESSION_AFTER_G2_CHECKPOINT	-1.79328	0.0182556	0.0414691
REACTOME_INTERLEUKIN_1_SIGNALING	-1.78996	0.0220441	0.0413732
REACTOME_PROGRAMMED_CELL_DEATH	-1.72653	0.0268199	0.0564358
REACTOME_MITOTIC_PROMETAPHASE	-1.72484	0.0232558	0.0557029
REACTOME_CELLULAR_RESPONSES_TO_EXTERNAL_STIMULI	-1.72167	0.0117878	0.0557157
REACTOME_DISORDERS_OF_TRANSMEMBRANE_TRANSPORTERS	-1.71145	0.0271967	0.0577875
REACTOME_INTERLEUKIN_1_FAMILY_SIGNALING	-1.70274	0.0196078	0.0592098
REACTOME_TRANSCRIPTIONAL_REGULATION_BY_TP53	-1.66646	0.0324544	0.0690922
REACTOME_ABC_FAMILY_PROTEINS_MEDIATED_TRANSPORT	-1.62027	0.0476191	0.0842227
REACTOME_MRNA_SPLICING	-1.59691	0.0511811	0.091711
REACTOME_UB_SPECIFIC_PROCESSING_PROTEASES	-1.5837	0.0383065	0.0953379
REACTOME_SIGNALING_BY_THE_B_CELL_RECEPTOR_BCR_	-1.55337	0.0581395	0.107846
REACTOME_RNA_POLYMERASE_II_TRANSCRIPTION	-1.54367	0.0422535	0.110458
REACTOME_PROTEIN_LOCALIZATION	-1.53087	0.0521042	0.114521
REACTOME_TRANSCRIPTIONAL_REGULATION_BY_RUNX2	-1.51952	0.0641822	0.118716
REACTOME_REGULATION_OF_EXPRESSION_OF_SLITS_AND_ROBOS	-1.46459	0.0733753	0.149262
REACTOME_HIV_LIFE_CYCLE	-1.42548	0.109091	0.172677
REACTOME_SIGNALING_BY_WNT	-1.40822	0.104628	0.182342
REACTOME_DEUBIQUITINATION	-1.36902	0.11245	0.21023
REACTOME_PTEN_REGULATION	-1.34753	0.131148	0.224265
REACTOME_INFLUENZA_INFECTION	-1.34671	0.134653	0.221386
REACTOME_REGULATION_OF_TP53_ACTIVITY	-1.2943	0.162427	0.267028
REACTOME_SIGNALING_BY_HEDGEHOG	-1.27991	0.168627	0.277623
REACTOME_TRANSPORT_OF_MATURE_TRANSCRIPT_TO_CYTOPLASM	-1.27278	0.179884	0.280411
REACTOME_NEUTROPHIL_DEGRANULATION	-1.26151	0.198	0.287761
REACTOME_TCF_DEPENDENT_SIGNALING_IN_RESPONSE_TO_WNT	-1.25868	0.189243	0.286375
REACTOME_CHROMATIN_MODIFYING_ENZYMES	-1.22945	0.219653	0.31471
REACTOME_FATTY_ACID_METABOLISM	-1.21785	0.20751	0.322981
REACTOME_SIGNALING_BY_NOTCH	-1.20946	0.222004	0.32818
REACTOME_INTRACELLULAR_SIGNALING_BY_SECOND_MESSENGERS	-1.19766	0.21822	0.33769
REACTOME_METABOLISM_OF_CARBOHYDRATES	-1.17003	0.244048	0.365669
REACTOME_SIGNALING_BY_ROBO_RECEPTORS	-1.16263	0.258727	0.369506
REACTOME_HEDGEHOG_ON_STATE	-1.15544	0.290581	0.373188
REACTOME_DEATH_RECEPTOR_SIGNALLING	-1.14797	0.299228	0.377739
REACTOME_RHO_GTPASE_EFFECTORS	-1.12827	0.290837	0.398673
REACTOME_CYTOKINE_SIGNALING_IN_IMMUNE_SYSTEM	-1.12584	0.315261	0.396285
REACTOME_SIGNALING_BY_INTERLEUKINS	-1.08414	0.349112	0.447881
REACTOME_METABOLISM_OF_STEROIDS	-1.04197	0.383817	0.503135
REACTOME_INTRA_GOLGI_AND_RETROGRADE_GOLGI_TO_ER_TRAFFIC	-1.04046	0.396078	0.499251
REACTOME_SIGNALING_BY_NUCLEAR_RECEPTORS	-1.02855	0.415058	0.510547
REACTOME_MUSCLE_CONTRACTION	-1.02494	0.409178	0.510092
REACTOME_FLT3_SIGNALING	-0.994735	0.415984	0.54899
REACTOME_CLASS_I_MHC_MEDIATED_ANTIGEN_PROCESSING_PRESENTATION	-0.990847	0.452869	0.548919
REACTOME_SUMOYLATION	-0.976994	0.457256	0.563293
REACTOME_INTERFERON_SIGNALING	-0.975108	0.46833	0.559733
REACTOME_POST_TRANSLATIONAL_PROTEIN_MODIFICATION	-0.968187	0.482402	0.563579
REACTOME_BIOLOGICAL_OXIDATIONS	-0.955291	0.520661	0.577432
REACTOME_SIGNALING_BY_RHO_GTPASES	-0.943806	0.510081	0.588557
REACTOME_INFECTIOUS_DISEASE	-0.921076	0.534553	0.617082
REACTOME_ADAPTIVE_IMMUNE_SYSTEM	-0.910424	0.544031	0.627959
REACTOME_MAPK_FAMILY_SIGNALING_CASCADES	-0.909418	0.575107	0.622829
REACTOME_DISEASES_OF_SIGNAL_TRANSDUCTION_BY_GROWTH_FACTOR_RECEPTORS_AND_SECOND_MESSENGERS	-0.893275	0.566265	0.641789
REACTOME_HCMV_INFECTION	-0.840072	0.649694	0.717387
REACTOME_ESTROGEN_DEPENDENT_GENE_EXPRESSION	-0.817191	0.687739	0.74546
REACTOME_DISEASE	-0.811509	0.703276	0.746529
REACTOME_CELL_JUNCTION_ORGANIZATION	-0.805421	0.743191	0.748228
REACTOME_ANTIGEN_PROCESSING_UBIQUITINATION_PROTEASOME_DEGRADATION	-0.79815	0.695391	0.750734
REACTOME_INNATE_IMMUNE_SYSTEM	-0.795659	0.716667	0.746838
REACTOME_METABOLISM_OF_VITAMINS_AND_COFACTORS	-0.706904	0.834915	0.860806
REACTOME_ESR_MEDIATED_SIGNALING	-0.691203	0.846004	0.870917
REACTOME_PHOSPHOLIPID_METABOLISM	-0.676165	0.852525	0.879042
REACTOME_CELL_CELL_COMMUNICATION	-0.595004	0.952	0.944453

## Sheet: Old HSC GSEA
Name	Net Enrichment Score	Nominal P-value	FDR
REACTOME_G_ALPHA_S_SIGNALLING_EVENTS	2.07899	0.00607287	0.13478
REACTOME_OLFACTORY_SIGNALING_PATHWAY	1.95997	0.00808081	0.129393
REACTOME_SIGNALING_BY_GPCR	1.80672	0.0182186	0.203854
REACTOME_GPCR_LIGAND_BINDING	1.67166	0.0286885	0.306058
REACTOME_SIGNALING_BY_RECEPTOR_TYROSINE_KINASES	1.65443	0.023622	0.266092
REACTOME_SLC_MEDIATED_TRANSMEMBRANE_TRANSPORT	1.34124	0.13347	0.875391
REACTOME_ANTI_INFLAMMATORY_RESPONSE_FAVOURING_LEISHMANIA_PARASITE_INFECTION	1.32475	0.132653	0.799054
REACTOME_L1CAM_INTERACTIONS	1.30687	0.162	0.748045
REACTOME_NEURONAL_SYSTEM	1.23172	0.215768	0.874355
REACTOME_EXTRACELLULAR_MATRIX_ORGANIZATION	1.22889	0.211694	0.793531
REACTOME_LEISHMANIA_INFECTION	1.22412	0.201717	0.734315
REACTOME_DEVELOPMENTAL_BIOLOGY	1.17175	0.262097	0.809845
REACTOME_TRANSPORT_TO_THE_GOLGI_AND_SUBSEQUENT_MODIFICATION	1.15133	0.279022	0.800757
REACTOME_G_ALPHA_Q_SIGNALLING_EVENTS	1.1346	0.293542	0.784671
REACTOME_DISEASES_OF_METABOLISM	1.12167	0.277108	0.763629
REACTOME_HEMOSTASIS	1.11208	0.305019	0.738542
REACTOME_CELL_SURFACE_INTERACTIONS_AT_THE_VASCULAR_WALL	1.10925	0.330661	0.701328
REACTOME_CARDIAC_CONDUCTION	1.10399	0.323136	0.673455
REACTOME_CLASS_A_1_RHODOPSIN_LIKE_RECEPTORS_	1.09809	0.303823	0.649388
REACTOME_IMMUNOREGULATORY_INTERACTIONS_BETWEEN_A_LYMPHOID_AND_A_NON_LYMPHOID_CELL	1.09545	0.307692	0.622029
REACTOME_RESPONSE_TO_ELEVATED_PLATELET_CYTOSOLIC_CA2_	1.08769	0.346639	0.606747
REACTOME_PLATELET_ACTIVATION_SIGNALING_AND_AGGREGATION	1.07614	0.353535	0.599259
REACTOME_FACTORS_INVOLVED_IN_MEGAKARYOCYTE_DEVELOPMENT_AND_PLATELET_PRODUCTION	1.05183	0.368313	0.615056
REACTOME_TRANSPORT_OF_SMALL_MOLECULES	0.998634	0.439689	0.694033
REACTOME_VESICLE_MEDIATED_TRANSPORT	0.961549	0.475915	0.738498
REACTOME_TRANSMISSION_ACROSS_CHEMICAL_SYNAPSES	0.952155	0.497065	0.728078
REACTOME_METABOLISM_OF_NUCLEOTIDES	0.945031	0.552239	0.7148
REACTOME_MEMBRANE_TRAFFICKING	0.918183	0.53719	0.739098
REACTOME_ION_CHANNEL_TRANSPORT	0.913684	0.551515	0.722838
REACTOME_ER_TO_GOLGI_ANTEROGRADE_TRANSPORT	0.909513	0.535294	0.706167
REACTOME_SIGNALING_BY_VEGF	0.843758	0.649706	0.797576
REACTOME_NERVOUS_SYSTEM_DEVELOPMENT	0.806864	0.715953	0.8346
REACTOME_ASPARAGINE_N_LINKED_GLYCOSYLATION	0.723928	0.839175	0.938713
REACTOME_TOLL_LIKE_RECEPTOR_CASCADES	0.71455	0.830986	0.923821
REACTOME_NEUROTRANSMITTER_RECEPTORS_AND_POSTSYNAPTIC_SIGNAL_TRANSMISSION	0.711935	0.809901	0.900991
REACTOME_AUTOPHAGY	0.678532	0.846791	0.916115
REACTOME_G_ALPHA_I_SIGNALLING_EVENTS	0.669468	0.877083	0.901394
REACTOME_PEPTIDE_LIGAND_BINDING_RECEPTORS	0.537436	0.981707	0.976554

## Sheet: Young MPP3 GSEA
Name	Net Enrichment Score	Nominal P-value	FDR
REACTOME_SIGNALING_BY_RECEPTOR_TYROSINE_KINASES	-1.9205	0.00784314	0.28267
REACTOME_OLFACTORY_SIGNALING_PATHWAY	-1.42777	0.0953307	1
REACTOME_SIGNALING_BY_NTRKS	-1.41857	0.0921844	1
REACTOME_G_ALPHA_S_SIGNALLING_EVENTS	-1.40352	0.103718	0.849398
REACTOME_EXTRACELLULAR_MATRIX_ORGANIZATION	-1.39298	0.128655	0.70997
REACTOME_REGULATION_OF_LIPID_METABOLISM_BY_PPARALPHA	-1.32402	0.164659	0.783699
REACTOME_DEVELOPMENTAL_BIOLOGY	-1.3233	0.12449	0.673125
REACTOME_CELL_SURFACE_INTERACTIONS_AT_THE_VASCULAR_WALL	-1.19661	0.249476	0.938749
REACTOME_SIGNALING_BY_GPCR	-1.18059	0.258252	0.885344
REACTOME_METABOLISM_OF_VITAMINS_AND_COFACTORS	-1.12522	0.302187	0.960314
REACTOME_TRANSCRIPTIONAL_REGULATION_BY_RUNX1	-1.05412	0.393443	1
REACTOME_INFLUENZA_INFECTION	-1.01287	0.438134	1
REACTOME_INTERFERON_SIGNALING	-0.988484	0.455796	1
REACTOME_CLASS_A_1_RHODOPSIN_LIKE_RECEPTORS_	-0.987624	0.475822	1
REACTOME_THE_CITRIC_ACID_TCA_CYCLE_AND_RESPIRATORY_ELECTRON_TRANSPORT	-0.866983	0.639344	1
REACTOME_G_ALPHA_Q_SIGNALLING_EVENTS	-0.842016	0.651303	1
REACTOME_AUTOPHAGY	-0.840317	0.656687	1
REACTOME_GPCR_LIGAND_BINDING	-0.837863	0.662698	1
REACTOME_G_ALPHA_I_SIGNALLING_EVENTS	-0.828922	0.685484	1
REACTOME_METABOLISM_OF_WATER_SOLUBLE_VITAMINS_AND_COFACTORS	-0.776611	0.753452	1
REACTOME_RNA_POLYMERASE_II_TRANSCRIPTION	-0.712481	0.851562	1
REACTOME_NEURONAL_SYSTEM	-0.665363	0.880077	1
REACTOME_RAB_REGULATION_OF_TRAFFICKING	-0.660393	0.89336	1
REACTOME_RESPIRATORY_ELECTRON_TRANSPORT_ATP_SYNTHESIS_BY_CHEMIOSMOTIC_COUPLING_AND_HEAT_PRODUCTION_BY_UNCOUPLING_PROTEINS	-0.646512	0.909627	1
REACTOME_CLATHRIN_MEDIATED_ENDOCYTOSIS	-0.603036	0.931106	1
REACTOME_PHOSPHOLIPID_METABOLISM	-0.557277	0.957031	1
REACTOME_HEMOSTASIS	-0.541747	0.968254	1
REACTOME_LEISHMANIA_INFECTION	-0.519606	0.985232	1
REACTOME_PLATELET_ACTIVATION_SIGNALING_AND_AGGREGATION	-0.515376	0.97992	1
REACTOME_SPHINGOLIPID_METABOLISM	-0.509247	0.979839	1
REACTOME_ION_CHANNEL_TRANSPORT	-0.502795	0.988439	1
REACTOME_TRANSMISSION_ACROSS_CHEMICAL_SYNAPSES	-0.478386	0.994424	0.992886

## Sheet: Old MPP3 GSEA
Name	Net Enrichment Score	Nominal P-value	FDR	Contributing Genes
REACTOME_CELL_CYCLE	2.93469	0	0	UBE2V2, PSMA4, CDCA8, PPP2R5D, AURKA, NCAPG, INCENP, PSMD4, SYCP3, RAD1, MAPK3, PSMC6, PSMD14, PSME3, RANGAP1, XPO1, SMC2, ESCO2, RAD9A, LBR, NUP188, BUB1B, RAB1A, NUDC, LIN37, MZT2B, MNAT1, USO1, CKAP5, RHNO1, TYMS, RUVBL2, ANAPC16, TUBGCP3, PSMA3, KIF20A, KAT5, GTSE1, RNF8, PSMD7, MLH3, HAUS1, TUBA4A, VRK1, CDK5RAP2, CHMP4B, NCAPH2, PRDM9, BLZF1, YWHAE, HMMR, DBF4, KIF23, HUS1, NEK9, CENPE, PSM…
REACTOME_NEUTROPHIL_DEGRANULATION	2.7754	0	0.000836	GLB1, B4GALT1, PA2G4, AMPD3, GDI2, SERPINB1, FCGR2A, PLD1, LAIR1, PSMD14, FUCA1, ANXA2, EPX, CAP1, FRK, KCNAB2, QSOX1, C3, CXCR2, STK11IP, CTSA, CD53, PKM, DNAJC3, PTPRB, SLC15A4, SNAP29, S100A8, ARL8A, PSMD7, HK3, CYSTM1, ALOX5, RAB44, HMGB1, FGL2, CPPED1, ADGRG3, SERPINA1, FCER1G, HP, CTSG, STOM, TRPM2, MGAM, VAT1, COTL1, MOSPD2, PSMD3, COMMD9, TBC1D10C, AP2A2, SLC11A1, OLFM4, AP1M1, CTSS, AGA,…
REACTOME_M_PHASE	2.75872	0	0.000557	PSMA4, CDCA8, PPP2R5D, NCAPG, INCENP, PSMD4, MAPK3, PSMC6, PSMD14, PSME3, RANGAP1, XPO1, SMC2, LBR, NUP188, BUB1B, RAB1A, NUDC, MZT2B, USO1, CKAP5, ANAPC16, TUBGCP3, PSMA3, KIF20A, PSMD7, HAUS1, TUBA4A, VRK1, CDK5RAP2, CHMP4B, NCAPH2, BLZF1, YWHAE, KIF23, NEK9, CENPE, PSMA6, STAG2, NDE1, ANAPC10, GOLGA2, PSMD3, GORASP2, PSMC1, UBA52, B9D2, H2AZ2, TUBB4A, PSMA1, PPP2R2A, PPP2R1B, LEMD2, CENPM, CDC…
REACTOME_CELL_CYCLE_MITOTIC	2.68966	0	0.00122731	PSMA4, CDCA8, PPP2R5D, AURKA, NCAPG, INCENP, PSMD4, MAPK3, PSMC6, PSMD14, PSME3, RANGAP1, XPO1, SMC2, ESCO2, LBR, NUP188, BUB1B, RAB1A, NUDC, LIN37, MZT2B, MNAT1, USO1, CKAP5, TYMS, ANAPC16, TUBGCP3, PSMA3, KIF20A, GTSE1, PSMD7, HAUS1, TUBA4A, VRK1, CDK5RAP2, CHMP4B, NCAPH2, BLZF1, YWHAE, HMMR, DBF4, KIF23, NEK9, CENPE, PSMA6, STAG2, NDE1, ANAPC10, GOLGA2, PSMD3, GORASP2, PSMC1, UBA52, RAB8A, B9D…
REACTOME_INNATE_IMMUNE_SYSTEM	2.52164	0	0.00408918	HSP90B1, GLB1, TAX1BP1, PSMA4, B4GALT1, PA2G4, PPP2R5D, TLR6, AMPD3, RIPK1, GDI2, PSMD4, SERPINB1, MAPK3, FCGR2A, CLU, PLD1, LAIR1, PSMC6, PSMD14, CLEC4E, PSME3, FUCA1, ANXA2, EPX, CAP1, FRK, KCNAB2, QSOX1, C3, CXCR2, C8G, STK11IP, HRAS, CTSA, CD53, PKM, CAPZA2, DNAJC3, NCF1, PTPRB, ACTR3, SLC15A4, SNAP29, PSMA3, S100A8, TRAF6, ARL8A, RPS6KA2, PSMD7, HK3, CYSTM1, CCR2, PSTPIP1, LIMK1, ALOX5, RAB4…
REACTOME_POST_TRANSLATIONAL_PROTEIN_MODIFICATION	2.16187	0.00197239	0.0449863
REACTOME_CELL_CYCLE_CHECKPOINTS	2.10378	0.00189036	0.0540295
REACTOME_MITOTIC_PROMETAPHASE	1.96969	0.010352	0.099901
REACTOME_UB_SPECIFIC_PROCESSING_PROTEASES	1.94484	0.012024	0.103683
REACTOME_METABOLISM_OF_RNA	1.86613	0.019084	0.147431
REACTOME_FCERI_MEDIATED_NF_KB_ACTIVATION	1.86365	0.0159363	0.136002
REACTOME_HIV_LIFE_CYCLE	1.86228	0.00779727	0.125281
REACTOME_APC_C_CDH1_MEDIATED_DEGRADATION_OF_CDC20_AND_OTHER_APC_C_CDH1_TARGETED_PROTEINS_IN_LATE_MITOSIS_EARLY_G1	1.79544	0.0170778	0.161974
REACTOME_MITOTIC_METAPHASE_AND_ANAPHASE	1.79136	0.0197628	0.153262
REACTOME_MEMBRANE_TRAFFICKING	1.72975	0.0191939	0.192261
REACTOME_ASPARAGINE_N_LINKED_GLYCOSYLATION	1.69069	0.0368217	0.218899
REACTOME_NEDDYLATION	1.67154	0.0313152	0.22405
REACTOME_APC_C_MEDIATED_DEGRADATION_OF_CELL_CYCLE_PROTEINS	1.65327	0.0417537	0.231378
REACTOME_METABOLISM_OF_AMINO_ACIDS_AND_DERIVATIVES	1.64907	0.036	0.223092
REACTOME_SEPARATION_OF_SISTER_CHROMATIDS	1.64341	0.0588235	0.2177
REACTOME_G2_M_CHECKPOINTS	1.61538	0.0405679	0.237555
REACTOME_PROCESSING_OF_CAPPED_INTRON_CONTAINING_PRE_MRNA	1.60642	0.0358566	0.237659
REACTOME_INTRA_GOLGI_AND_RETROGRADE_GOLGI_TO_ER_TRAFFIC	1.60077	0.0537849	0.233009
REACTOME_MITOTIC_G2_G2_M_PHASES	1.59922	0.0503876	0.224691
REACTOME_CLASS_I_MHC_MEDIATED_ANTIGEN_PROCESSING_PRESENTATION	1.59877	0.0390625	0.216144
REACTOME_MITOTIC_SPINDLE_CHECKPOINT	1.58685	0.0412574	0.219667
REACTOME_ANTIGEN_PROCESSING_CROSS_PRESENTATION	1.57792	0.0503145	0.222214
REACTOME_METABOLISM_OF_STEROIDS	1.53711	0.0818363	0.261367
REACTOME_PROGRAMMED_CELL_DEATH	1.49779	0.0656064	0.30153
REACTOME_FC_EPSILON_RECEPTOR_FCERI_SIGNALING	1.49359	0.0670611	0.296397
REACTOME_DEUBIQUITINATION	1.48773	0.0876191	0.294369
REACTOME_THE_ROLE_OF_GTSE1_IN_G2_M_PROGRESSION_AFTER_G2_CHECKPOINT	1.484	0.0851064	0.288645
REACTOME_INTERLEUKIN_1_FAMILY_SIGNALING	1.48116	0.0758755	0.282901
REACTOME_REGULATION_OF_RAS_BY_GAPS	1.47938	0.0938776	0.276482
REACTOME_SIGNALING_BY_NOTCH4	1.47863	0.0759494	0.269333
REACTOME_CLEC7A_DECTIN_1_SIGNALING	1.45852	0.0920245	0.286248
REACTOME_SIGNALING_BY_THE_B_CELL_RECEPTOR_BCR_	1.45513	0.08125	0.282153
REACTOME_SIGNALING_BY_RHO_GTPASES	1.44267	0.0953307	0.290086
REACTOME_SIGNALING_BY_NOTCH	1.41631	0.0843621	0.315973
REACTOME_FATTY_ACID_METABOLISM	1.40974	0.107943	0.316179
REACTOME_C_TYPE_LECTIN_RECEPTORS_CLRS_	1.40443	0.108696	0.314377
REACTOME_DEGRADATION_OF_BETA_CATENIN_BY_THE_DESTRUCTION_COMPLEX	1.40193	0.102119	0.311066
REACTOME_CYCLIN_A_CDK2_ASSOCIATED_EVENTS_AT_S_PHASE_ENTRY	1.39162	0.114967	0.317571
REACTOME_VESICLE_MEDIATED_TRANSPORT	1.38507	0.0927419	0.318985
REACTOME_ANTIGEN_PROCESSING_UBIQUITINATION_PROTEASOME_DEGRADATION	1.37782	0.119923	0.321293
REACTOME_SWITCHING_OF_ORIGINS_TO_A_POST_REPLICATIVE_STATE	1.36883	0.121212	0.326224
REACTOME_SUMOYLATION	1.36329	0.13442	0.327218
REACTOME_INTERLEUKIN_1_SIGNALING	1.34733	0.131429	0.340556
REACTOME_HIV_INFECTION	1.34654	0.133333	0.334906
REACTOME_RHO_GTPASES_ACTIVATE_FORMINS	1.33894	0.135628	0.337916
REACTOME_RHO_GTPASE_CYCLE	1.33179	0.135458	0.340507
REACTOME_COPI_DEPENDENT_GOLGI_TO_ER_RETROGRADE_TRAFFIC	1.3268	0.15507	0.34074
REACTOME_DNA_REPAIR	1.32543	0.131959	0.336188
REACTOME_MAPK6_MAPK4_SIGNALING	1.31378	0.146091	0.344493
REACTOME_MRNA_SPLICING	1.30926	0.133333	0.345618
REACTOME_TOLL_LIKE_RECEPTOR_CASCADES	1.29953	0.165103	0.352352
REACTOME_ORC1_REMOVAL_FROM_CHROMATIN	1.28079	0.168174	0.371716
REACTOME_ABC_FAMILY_PROTEINS_MEDIATED_TRANSPORT	1.2699	0.183752	0.379906
REACTOME_RHO_GTPASE_EFFECTORS	1.26695	0.167984	0.377171
REACTOME_HEDGEHOG_ON_STATE	1.26633	0.157685	0.371591
REACTOME_TNFR2_NON_CANONICAL_NF_KB_PATHWAY	1.26518	0.177824	0.367366
REACTOME_MUSCLE_CONTRACTION	1.24686	0.188017	0.385592
REACTOME_DEATH_RECEPTOR_SIGNALLING	1.24513	0.197917	0.381432
REACTOME_REGULATION_OF_TP53_ACTIVITY	1.23326	0.184211	0.391305
REACTOME_SIGNALING_BY_INTERLEUKINS	1.22098	0.220202	0.40151
REACTOME_DNA_DOUBLE_STRAND_BREAK_REPAIR	1.21947	0.21748	0.397291
REACTOME_TRANSPORT_TO_THE_GOLGI_AND_SUBSEQUENT_MODIFICATION	1.21748	0.225738	0.393903
REACTOME_RESOLUTION_OF_SISTER_CHROMATID_COHESION	1.21247	0.225352	0.394869
REACTOME_ADAPTIVE_IMMUNE_SYSTEM	1.20998	0.228992	0.392251
REACTOME_PTEN_REGULATION	1.20397	0.206	0.394698
REACTOME_TRANSCRIPTIONAL_REGULATION_BY_RUNX2	1.19465	0.235294	0.402735
REACTOME_FLT3_SIGNALING	1.18897	0.238776	0.405169
REACTOME_ER_TO_GOLGI_ANTEROGRADE_TRANSPORT	1.18822	0.245322	0.400602
REACTOME_DEGRADATION_OF_GLI1_BY_THE_PROTEASOME	1.1842	0.245361	0.40093
REACTOME_DNA_REPLICATION	1.18234	0.233871	0.398003
REACTOME_ASYMMETRIC_LOCALIZATION_OF_PCP_PROTEINS	1.16334	0.27163	0.418042
REACTOME_DISORDERS_OF_TRANSMEMBRANE_TRANSPORTERS	1.14374	0.286902	0.44161
REACTOME_UCH_PROTEINASES	1.14326	0.282692	0.436881
REACTOME_S_PHASE	1.13555	0.283702	0.442606
REACTOME_MAPK_FAMILY_SIGNALING_CASCADES	1.11476	0.293763	0.467694
REACTOME_HEDGEHOG_OFF_STATE	1.1107	0.318	0.467455
REACTOME_INFECTIOUS_DISEASE	1.10598	0.310484	0.469218
REACTOME_TRANSCRIPTIONAL_REGULATION_BY_RUNX3	1.09459	0.315068	0.481763
REACTOME_PCP_CE_PATHWAY	1.06622	0.386454	0.520449
REACTOME_BETA_CATENIN_INDEPENDENT_WNT_SIGNALING	1.0655	0.362429	0.515544
REACTOME_GOLGI_TO_ER_RETROGRADE_TRANSPORT	1.0457	0.391473	0.542555
REACTOME_RRNA_PROCESSING	1.04534	0.386617	0.536916
REACTOME_DNA_REPLICATION_PRE_INITIATION	1.03541	0.417495	0.547034
REACTOME_HOST_INTERACTIONS_OF_HIV_FACTORS	1.01828	0.423459	0.569406
REACTOME_TRANSCRIPTIONAL_REGULATION_BY_TP53	0.995522	0.443992	0.601175
REACTOME_TCF_DEPENDENT_SIGNALING_IN_RESPONSE_TO_WNT	0.988477	0.44316	0.606105
REACTOME_MITOTIC_G1_PHASE_AND_G1_S_TRANSITION	0.985682	0.454728	0.604333
REACTOME_TCR_SIGNALING	0.978378	0.440385	0.610194
REACTOME_DISEASE	0.96846	0.468127	0.620038
REACTOME_RUNX1_REGULATES_TRANSCRIPTION_OF_GENES_INVOLVED_IN_DIFFERENTIATION_OF_HSCS	0.966882	0.456349	0.615905
REACTOME_ORGANELLE_BIOGENESIS_AND_MAINTENANCE	0.940863	0.52988	0.652386
REACTOME_INTRACELLULAR_SIGNALING_BY_SECOND_MESSENGERS	0.934489	0.526733	0.656618
REACTOME_COPI_MEDIATED_ANTEROGRADE_TRANSPORT	0.910193	0.560825	0.692301
REACTOME_SIGNALING_BY_WNT	0.904223	0.531496	0.695789
REACTOME_DISEASES_OF_SIGNAL_TRANSDUCTION_BY_GROWTH_FACTOR_RECEPTORS_AND_SECOND_MESSENGERS	0.903581	0.583665	0.689937
REACTOME_DISEASES_OF_METABOLISM	0.901823	0.567404	0.686193
REACTOME_PEPTIDE_LIGAND_BINDING_RECEPTORS	0.899771	0.560694	0.682869
REACTOME_CYTOKINE_SIGNALING_IN_IMMUNE_SYSTEM	0.893722	0.620408	0.687049
REACTOME_BIOLOGICAL_OXIDATIONS	0.889616	0.586207	0.6872
REACTOME_NERVOUS_SYSTEM_DEVELOPMENT	0.871312	0.653226	0.710371
REACTOME_METABOLISM_OF_CARBOHYDRATES	0.868162	0.622718	0.708953
REACTOME_CILIUM_ASSEMBLY	0.829208	0.666012	0.766218
REACTOME_MHC_CLASS_II_ANTIGEN_PRESENTATION	0.799496	0.703774	0.805952
REACTOME_SIGNALING_BY_HEDGEHOG	0.797753	0.705765	0.801411
REACTOME_FACTORS_INVOLVED_IN_MEGAKARYOCYTE_DEVELOPMENT_AND_PLATELET_PRODUCTION	0.78386	0.748571	0.815546
REACTOME_CHROMATIN_MODIFYING_ENZYMES	0.771842	0.764706	0.827218
REACTOME_EUKARYOTIC_TRANSLATION_INITIATION	0.754124	0.75365	0.846073
REACTOME_SIGNALING_BY_ROBO_RECEPTORS	0.733378	0.779093	0.86729
REACTOME_METABOLISM_OF_LIPIDS	0.717347	0.832323	0.881739
REACTOME_REGULATION_OF_EXPRESSION_OF_SLITS_AND_ROBOS	0.692469	0.844182	0.905473
REACTOME_ESR_MEDIATED_SIGNALING	0.617535	0.924125	0.97577
REACTOME_SIGNALING_BY_NUCLEAR_RECEPTORS	0.615249	0.935547	0.969762
REACTOME_RESPONSE_TO_ELEVATED_PLATELET_CYTOSOLIC_CA2_	0.608261	0.926829	0.967486
REACTOME_CELLULAR_RESPONSES_TO_EXTERNAL_STIMULI	0.573971	0.942197	0.983174
REACTOME_TRANSPORT_OF_SMALL_MOLECULES	0.568592	0.95946	0.97805
REACTOME_TRANSLATION	0.556795	0.959184	0.975745
REACTOME_SLC_MEDIATED_TRANSMEMBRANE_TRANSPORT	0.453077	0.998113	0.996713

## Sheet: Young MPP4 GSEA
Name	Net Enrichment Score	Nominal P-value	FDR
REACTOME_EXTRACELLULAR_MATRIX_ORGANIZATION	-1.77131	0.0234375	0.407985
REACTOME_MUSCLE_CONTRACTION	-1.69816	0.0346939	0.297612
REACTOME_CARDIAC_CONDUCTION	-1.5942	0.0538922	0.323675
REACTOME_CLATHRIN_MEDIATED_ENDOCYTOSIS	-1.32399	0.142035	0.770843
REACTOME_DEGRADATION_OF_THE_EXTRACELLULAR_MATRIX	-1.29288	0.172481	0.693311
REACTOME_PLATELET_ACTIVATION_SIGNALING_AND_AGGREGATION	-1.10368	0.320312	1
REACTOME_TRANSLATION	-1.02355	0.403614	1
REACTOME_MEMBRANE_TRAFFICKING	-0.996419	0.417695	1
REACTOME_RESPONSE_TO_ELEVATED_PLATELET_CYTOSOLIC_CA2_	-0.969766	0.494824	1
REACTOME_METABOLISM_OF_STEROIDS	-0.945045	0.513078	1
REACTOME_CELLULAR_RESPONSES_TO_EXTERNAL_STIMULI	-0.889088	0.598077	1
REACTOME_VESICLE_MEDIATED_TRANSPORT	-0.857978	0.630648	1
REACTOME_THE_CITRIC_ACID_TCA_CYCLE_AND_RESPIRATORY_ELECTRON_TRANSPORT	-0.838496	0.624278	1
REACTOME_REGULATION_OF_EXPRESSION_OF_SLITS_AND_ROBOS	-0.821943	0.6841	1
REACTOME_PHOSPHOLIPID_METABOLISM	-0.802986	0.720879	0.993969
REACTOME_ASPARAGINE_N_LINKED_GLYCOSYLATION	-0.739409	0.790099	1
REACTOME_DEVELOPMENTAL_BIOLOGY	-0.73485	0.808554	0.989788
REACTOME_DISEASES_OF_METABOLISM	-0.713101	0.820076	0.967364
REACTOME_ORGANELLE_BIOGENESIS_AND_MAINTENANCE	-0.708057	0.847584	0.923406
REACTOME_SIGNALING_BY_NTRKS	-0.68742	0.847826	0.902469
REACTOME_G_ALPHA_I_SIGNALLING_EVENTS	1	0.999277	1

## Sheet: Old MPP4 GSEA
Name	Net Enrichment Score	Nominal P-value	FDR	Contributing Genes
REACTOME_CELL_CYCLE	3.6585	0	0	SPO11, ESCO2, POLR2J, PSMA4, CDC27, WRN, NSD2, MAD2L1, MASTL, KIF2A, ESPL1, EML4, HSP90AB1, NUF2, CDC14A, SKA2, VRK2, EP300, HMMR, BARD1, PSMF1, TUBB, RFC3, HUS1, KNL1, SMC2, GTSE1, CLSPN, CDK1, TPX2, CDC25C, KPNB1, JAK2, MIS18A, LIG1, CCNA2, TUBGCP4, MAPRE1, BUB1, POLE3, KIF2C, CENPE, UBE2C, ZWILCH, CENPH, TPR, BIRC5, PCM1, PSMB11, GINS1, TOP2A, BRCA2, CDK6, KIF23, KNTC1, MRE11, ITGB3BP, ANAPC10…
REACTOME_CELL_CYCLE_CHECKPOINTS	3.62292	0	0	PSMA4, CDC27, WRN, NSD2, MAD2L1, KIF2A, NUF2, SKA2, BARD1, PSMF1, RFC3, HUS1, KNL1, GTSE1, CLSPN, CDK1, CDC25C, CCNA2, MAPRE1, BUB1, KIF2C, CENPE, UBE2C, ZWILCH, CENPH, BIRC5, PSMB11, KNTC1, MRE11, ITGB3BP, ANAPC10, PSMA6, PSMA2, DSN1, CCNB1, MIS12, KIF18A, UBE2S, DYNLL1
REACTOME_CELL_CYCLE_MITOTIC	3.61195	0	0	ESCO2, PSMA4, CDC27, MAD2L1, MASTL, KIF2A, ESPL1, EML4, HSP90AB1, NUF2, CDC14A, SKA2, VRK2, EP300, HMMR, PSMF1, TUBB, RFC3, KNL1, SMC2, GTSE1, CDK1, TPX2, CDC25C, KPNB1, JAK2, LIG1, CCNA2, TUBGCP4, MAPRE1, BUB1, POLE3, KIF2C, CENPE, UBE2C, ZWILCH, CENPH, TPR, BIRC5, PCM1, PSMB11, GINS1, TOP2A, CDK6, KIF23, KNTC1, ITGB3BP, ANAPC10, PSMA6, PSMA2, KIF20A, DSN1, CCNB1, MIS12, RAB1A, SMC1A, MCPH1, POL…
REACTOME_M_PHASE	3.21065	0	0	PSMA4, CDC27, MAD2L1, MASTL, KIF2A, ESPL1, EML4, NUF2, SKA2, VRK2, PSMF1, TUBB, KNL1, SMC2, CDK1, KPNB1, TUBGCP4, MAPRE1, BUB1, KIF2C, CENPE, UBE2C, ZWILCH, CENPH, TPR, BIRC5, PCM1, PSMB11, KIF23, KNTC1, ITGB3BP, ANAPC10, PSMA6, PSMA2, KIF20A, DSN1, CCNB1, MIS12, RAB1A, SMC1A, MCPH1, KIF18A, UBE2S, PRKACA, TUBB6, H3-3A, CEP131, DYNLL1
REACTOME_MITOTIC_METAPHASE_AND_ANAPHASE	2.89728	0	0	PSMA4, CDC27, MAD2L1, KIF2A, ESPL1, NUF2, SKA2, VRK2, PSMF1, KNL1, CDK1, KPNB1, MAPRE1, BUB1, KIF2C, CENPE, UBE2C, ZWILCH, CENPH, BIRC5, PSMB11, KNTC1, ITGB3BP, ANAPC10, PSMA6, PSMA2, DSN1, CCNB1, MIS12, SMC1A, KIF18A, UBE2S, TUBB6, DYNLL1
REACTOME_G2_M_CHECKPOINTS	2.73935	0	0.000253
REACTOME_SEPARATION_OF_SISTER_CHROMATIDS	2.70946	0	0.000217
REACTOME_MITOTIC_PROMETAPHASE	2.38754	0	0.00488412
REACTOME_RESOLUTION_OF_SISTER_CHROMATID_COHESION	2.36717	0.0019802	0.00485765
REACTOME_MITOTIC_SPINDLE_CHECKPOINT	2.3553	0.00207039	0.00452098
REACTOME_REGULATION_OF_TP53_ACTIVITY	2.29914	0	0.00693552
REACTOME_DISORDERS_OF_TRANSMEMBRANE_TRANSPORTERS	2.12982	0	0.0173865
REACTOME_SIGNALING_BY_RHO_GTPASES	2.10308	0.00203252	0.0184221
REACTOME_DNA_REPLICATION	2.08004	0	0.0203097
REACTOME_S_PHASE	2.03994	0.00607287	0.0239682
REACTOME_RHO_GTPASE_EFFECTORS	2.0236	0.00407332	0.0244631
REACTOME_TRANSCRIPTIONAL_REGULATION_BY_TP53	1.99808	0.0121458	0.0267535
REACTOME_MITOTIC_G2_G2_M_PHASES	1.98609	0.0101626	0.027446
REACTOME_METABOLISM_OF_RNA	1.97975	0.00215983	0.027382
REACTOME_DNA_REPAIR	1.95989	0.00816327	0.0296642
REACTOME_C_TYPE_LECTIN_RECEPTORS_CLRS_	1.9399	0.004158	0.0313346
REACTOME_DISEASE	1.90522	0.00984252	0.035813
REACTOME_RHO_GTPASES_ACTIVATE_FORMINS	1.88392	0.0077821	0.0376128
REACTOME_ADAPTIVE_IMMUNE_SYSTEM	1.82767	0.0176817	0.0481934
REACTOME_DEUBIQUITINATION	1.80913	0.0142857	0.0516624
REACTOME_CLASS_I_MHC_MEDIATED_ANTIGEN_PROCESSING_PRESENTATION	1.7772	0.013834	0.0584248
REACTOME_TRANSPORT_OF_SMALL_MOLECULES	1.7201	0.0223577	0.0750168
REACTOME_ANTIGEN_PROCESSING_UBIQUITINATION_PROTEASOME_DEGRADATION	1.68935	0.0272537	0.0842437
REACTOME_DNA_DOUBLE_STRAND_BREAK_REPAIR	1.6889	0.0204499	0.0813921
REACTOME_POST_TRANSLATIONAL_PROTEIN_MODIFICATION	1.68484	0.0318091	0.0799835
REACTOME_MHC_CLASS_II_ANTIGEN_PRESENTATION	1.68169	0.0367505	0.0785694
REACTOME_INNATE_IMMUNE_SYSTEM	1.67689	0.0311284	0.078131
REACTOME_MAPK_FAMILY_SIGNALING_CASCADES	1.66715	0.0302376	0.0792835
REACTOME_FLT3_SIGNALING	1.59143	0.0557621	0.111591
REACTOME_UB_SPECIFIC_PROCESSING_PROTEASES	1.57869	0.041841	0.114904
REACTOME_SUMOYLATION	1.55486	0.048583	0.125251
REACTOME_DISEASES_OF_SIGNAL_TRANSDUCTION_BY_GROWTH_FACTOR_RECEPTORS_AND_SECOND_MESSENGERS	1.53484	0.0614407	0.134124
REACTOME_CYTOKINE_SIGNALING_IN_IMMUNE_SYSTEM	1.45188	0.0650096	0.188784
REACTOME_RNA_POLYMERASE_II_TRANSCRIPTION	1.44661	0.06917	0.188114
REACTOME_ESR_MEDIATED_SIGNALING	1.43195	0.12253	0.194841
REACTOME_HIV_INFECTION	1.42084	0.092	0.198107
REACTOME_PROCESSING_OF_CAPPED_INTRON_CONTAINING_PRE_MRNA	1.41729	0.122984	0.196245
REACTOME_INFECTIOUS_DISEASE	1.3594	0.124752	0.243835
REACTOME_G_ALPHA_S_SIGNALLING_EVENTS	1.35455	0.124224	0.243326
REACTOME_LEISHMANIA_INFECTION	1.2978	0.160966	0.294462
REACTOME_FACTORS_INVOLVED_IN_MEGAKARYOCYTE_DEVELOPMENT_AND_PLATELET_PRODUCTION	1.28836	0.172917	0.297851
REACTOME_COPI_DEPENDENT_GOLGI_TO_ER_RETROGRADE_TRAFFIC	1.27981	0.17154	0.302108
REACTOME_NEUTROPHIL_DEGRANULATION	1.27633	0.172888	0.299435
REACTOME_INTRACELLULAR_SIGNALING_BY_SECOND_MESSENGERS	1.2684	0.180198	0.300633
REACTOME_SIGNALING_BY_RECEPTOR_TYROSINE_KINASES	1.26164	0.188119	0.302817
REACTOME_TRANSMISSION_ACROSS_CHEMICAL_SYNAPSES	1.19548	0.237903	0.381505
REACTOME_GOLGI_TO_ER_RETROGRADE_TRANSPORT	1.16786	0.249057	0.410646
REACTOME_SLC_MEDIATED_TRANSMEMBRANE_TRANSPORT	1.16427	0.25974	0.407061
REACTOME_SIGNALING_BY_HEDGEHOG	1.16258	0.27381	0.40157
REACTOME_GPCR_LIGAND_BINDING	1.15792	0.267347	0.400678
REACTOME_SIGNALING_BY_NUCLEAR_RECEPTORS	1.15736	0.257874	0.394371
REACTOME_OLFACTORY_SIGNALING_PATHWAY	1.13443	0.320084	0.417923
REACTOME_SIGNALING_BY_NOTCH	1.08683	0.343689	0.477643
REACTOME_CLASS_A_1_RHODOPSIN_LIKE_RECEPTORS_	1.06419	0.353965	0.503419
REACTOME_NEDDYLATION	1.03016	0.394531	0.548795
REACTOME_INTERFERON_SIGNALING	1.00987	0.436	0.571329
REACTOME_METABOLISM_OF_AMINO_ACIDS_AND_DERIVATIVES	1.00216	0.45328	0.574637
REACTOME_NEUROTRANSMITTER_RECEPTORS_AND_POSTSYNAPTIC_SIGNAL_TRANSMISSION	0.998263	0.445525	0.572122
REACTOME_INTRA_GOLGI_AND_RETROGRADE_GOLGI_TO_ER_TRAFFIC	0.978202	0.475728	0.595639
REACTOME_G_ALPHA_Q_SIGNALLING_EVENTS	0.953325	0.510638	0.626974
REACTOME_PEPTIDE_LIGAND_BINDING_RECEPTORS	0.924526	0.562241	0.665229
REACTOME_NERVOUS_SYSTEM_DEVELOPMENT	0.899783	0.568932	0.698504
REACTOME_SIGNALING_BY_GPCR	0.884407	0.585938	0.714908
REACTOME_CILIUM_ASSEMBLY	0.87706	0.586	0.717691
REACTOME_HEMOSTASIS	0.83467	0.639469	0.777149
REACTOME_PROTEIN_LOCALIZATION	0.819372	0.672727	0.791029
REACTOME_SIGNALING_BY_WNT	0.818666	0.696607	0.781205
REACTOME_ION_CHANNEL_TRANSPORT	0.809704	0.691715	0.784797
REACTOME_METABOLISM_OF_CARBOHYDRATES	0.793352	0.718504	0.799736
REACTOME_SIGNALING_BY_ROBO_RECEPTORS	0.779844	0.749515	0.810494
REACTOME_SIGNALING_BY_INTERLEUKINS	0.77755	0.747082	0.803031
REACTOME_CHROMATIN_MODIFYING_ENZYMES	0.77072	0.726916	0.80233
REACTOME_TRANSCRIPTIONAL_REGULATION_BY_RUNX2	0.766416	0.768145	0.798635
REACTOME_PROGRAMMED_CELL_DEATH	0.717279	0.844488	0.854941
REACTOME_NEURONAL_SYSTEM	0.695662	0.857143	0.870831
REACTOME_TRANSCRIPTIONAL_REGULATION_BY_RUNX1	0.565171	0.955854	0.974481
REACTOME_METABOLISM_OF_LIPIDS	0.530387	0.978887	0.978716
